# Supplementary material for: Replicative and radiation-induced aging: a comparison of gene expression profiles
Source: Aging (Albany NY). 2019 Apr 19;11(8):2378–87. doi: 10.18632/aging.101921 (PMC6520014; doi:10.18632/aging.101921)
Supplement: Supplemental Table S1 [file aging-11-101921-s001.xlsx]

## Sheet: Up-regulation_5cGy_24h_vs_EMTAB
GO biological process complete	upload_1 (fold Enrichment)	upload_1 (raw P-value)
enzyme linked receptor protein signaling pathway (GO:0007167)	4.65	2.41e-05
maintenance of protein location (GO:0045185)	13.63	4.05e-05
regulation of DNA-binding transcription factor activity (GO:0051090)	5.62	9.55e-05
maintenance of location (GO:0051235)	8.93	0.000277
transmembrane receptor protein tyrosine kinase signaling pathway (GO:0007169)	4.75	0.000294
regulation of growth hormone receptor signaling pathway (GO:0060398)	99.98	0.000301
positive regulation of xenophagy (GO:1904417)	99.98	0.000301
regulation of xenophagy (GO:1904415)	99.98	0.000301
transmembrane receptor protein serine/threonine kinase signaling pathway (GO:0007178)	7.57	0.000576
cell development (GO:0048468)	2.62	0.00076
regulation of phosphatidylinositol 3-kinase signaling (GO:0014066)	10	0.000777
regulation of gastric acid secretion (GO:0060453)	49.99	0.000965
SMAD protein signal transduction (GO:0060395)	15.25	0.00115
insulin-like growth factor receptor signaling pathway (GO:0048009)	42.85	0.00127
signaling (GO:0023052)	1.7	0.00134
response to oxygen-containing compound (GO:1901700)	2.56	0.00146
epithelial cell-cell adhesion (GO:0090136)	37.49	0.00161
neuron projection development (GO:0031175)	3.64	0.00162
regulation of localization (GO:0032879)	2.11	0.0018
activation of MAPK activity (GO:0000187)	7.89	0.00182
positive regulation of MAPK cascade (GO:0043410)	3.92	0.00214
peptidyl-serine phosphorylation (GO:0018105)	7.45	0.00223
maintenance of protein location in cell (GO:0032507)	11.84	0.00232
cell surface receptor signaling pathway (GO:0007166)	2.09	0.00254
response to endogenous stimulus (GO:0009719)	2.52	0.00265
response to organic substance (GO:0010033)	1.95	0.00307
plasma membrane bounded cell projection organization (GO:0120036)	2.77	0.00314
peptidyl-serine modification (GO:0018209)	6.49	0.00363
BMP signaling pathway (GO:0030509)	10	0.00368
cell communication (GO:0007154)	1.61	0.00392
protein autophosphorylation (GO:0046777)	6.31	0.00398
cell projection organization (GO:0030030)	2.67	0.00406
maintenance of location in cell (GO:0051651)	9.28	0.00451
protein phosphorylation (GO:0006468)	2.8	0.00475
eating behavior (GO:0042755)	20.69	0.00476
regulation of ion transmembrane transport (GO:0034765)	3.82	0.00504
synaptic transmission, glutamatergic (GO:0035249)	20	0.00506
neuron development (GO:0048666)	2.98	0.00539
regulation of MAP kinase activity (GO:0043405)	4.48	0.00546
cellular response to BMP stimulus (GO:0071773)	8.57	0.00559
response to BMP (GO:0071772)	8.57	0.00559
peptidyl-tyrosine autophosphorylation (GO:0038083)	18.75	0.0057
positive regulation of cytosolic calcium ion concentration involved in phospholipase C-activating G protein-coupled signaling pathway (GO:0051482)	18.75	0.0057
response to retinoic acid (GO:0032526)	8.33	0.00603
cellular response to stimulus (GO:0051716)	1.51	0.00625
positive regulation of intracellular signal transduction (GO:1902533)	2.68	0.00627
regulation of cell migration (GO:0030334)	2.9	0.00635
negative regulation of cellular protein localization (GO:1903828)	8.11	0.00649
rhombomere 5 formation (GO:0021666)	> 100	0.00663
rhombomere 5 morphogenesis (GO:0021664)	> 100	0.00663
rhombomere 3 formation (GO:0021660)	> 100	0.00663
rhombomere formation (GO:0021594)	> 100	0.00663
dendritic cell cytokine production (GO:0002371)	> 100	0.00663
negative regulation of apolipoprotein binding (GO:2000657)	> 100	0.00663
regulation of apolipoprotein binding (GO:2000656)	> 100	0.00663
regulation of copper ion transmembrane transport (GO:1902311)	> 100	0.00663
mast cell proliferation (GO:0070662)	> 100	0.00663
positive regulation of pyloric antrum smooth muscle contraction (GO:0120072)	> 100	0.00663
regulation of pyloric antrum smooth muscle contraction (GO:0120071)	> 100	0.00663
positive regulation of colon smooth muscle contraction (GO:1904343)	> 100	0.00663
regulation of colon smooth muscle contraction (GO:1904341)	> 100	0.00663
melanocyte adhesion (GO:0097326)	> 100	0.00663
heparin catabolic process (GO:0030211)	> 100	0.00663
dermatan sulfate catabolic process (GO:0030209)	> 100	0.00663
signal transduction (GO:0007165)	1.63	0.00677
regulation of stress-activated MAPK cascade (GO:0032872)	5.31	0.00723
biological regulation (GO:0065007)	1.27	0.00738
regulation of stress-activated protein kinase signaling cascade (GO:0070302)	5.26	0.00745
response to lipid (GO:0033993)	2.8	0.0078
anatomical structure development (GO:0048856)	1.57	0.00842
regulation of digestive system process (GO:0044058)	15	0.0086
regulation of transport (GO:0051049)	2.13	0.00872
cell death (GO:0008219)	2.52	0.00936
regulation of cell motility (GO:2000145)	2.7	0.00954
localization (GO:0051179)	1.54	0.0098
positive regulation of gastric acid secretion (GO:0060454)	> 100	0.00994
negative regulation of growth hormone receptor signaling pathway (GO:0060400)	> 100	0.00994
rhombomere 3 morphogenesis (GO:0021658)	> 100	0.00994
rhombomere morphogenesis (GO:0021593)	> 100	0.00994
Kit signaling pathway (GO:0038109)	> 100	0.00994
mast cell cytokine production (GO:0032762)	> 100	0.00994
regulation of Fas signaling pathway (GO:1902044)	> 100	0.00994
inactivation of MAPKK activity (GO:0051389)	> 100	0.00994
cellular response to stem cell factor stimulus (GO:0036216)	> 100	0.00994
response to stem cell factor (GO:0036215)	> 100	0.00994
melanocyte migration (GO:0097324)	> 100	0.00994
regulation of locomotor rhythm (GO:1904059)	> 100	0.00994
lung morphogenesis (GO:0060425)	13.63	0.0103
establishment or maintenance of epithelial cell apical/basal polarity (GO:0045197)	13.63	0.0103
regulation of transmembrane transport (GO:0034762)	3.26	0.0105
cellular response to amino acid starvation (GO:0034198)	13.33	0.0107
detection of mechanical stimulus (GO:0050982)	13.33	0.0107
positive regulation of response to biotic stimulus (GO:0002833)	13.04	0.0111
learning or memory (GO:0007611)	4.67	0.0111
positive regulation of MAP kinase activity (GO:0043406)	4.65	0.0113
establishment or maintenance of apical/basal cell polarity (GO:0035088)	12.76	0.0116
establishment or maintenance of bipolar cell polarity (GO:0061245)	12.76	0.0116
response to amino acid starvation (GO:1990928)	12.5	0.012
regulation of chondrocyte differentiation (GO:0032330)	12.5	0.012
positive regulation of pathway-restricted SMAD protein phosphorylation (GO:0010862)	12.5	0.012
negative regulation of endothelial cell migration (GO:0010596)	12.5	0.012
regulation of MAPK cascade (GO:0043408)	2.83	0.012
intracellular signal transduction (GO:0035556)	2.15	0.0121
transport (GO:0006810)	1.61	0.0122
positive regulation of DNA-binding transcription factor activity (GO:0051091)	4.53	0.0123
oligosaccharide metabolic process (GO:0009311)	12.24	0.0125
behavior (GO:0007610)	3.12	0.0129
regulation of transporter activity (GO:0032409)	4.44	0.0131
mast cell differentiation (GO:0060374)	99.98	0.0132
rhombomere 5 development (GO:0021571)	99.98	0.0132
rhombomere 3 development (GO:0021569)	99.98	0.0132
ureteric bud invasion (GO:0072092)	99.98	0.0132
modulation by host of viral RNA genome replication (GO:0044830)	99.98	0.0132
regulation of kainate selective glutamate receptor activity (GO:2000312)	99.98	0.0132
N-acylethanolamine metabolic process (GO:0070291)	99.98	0.0132
positive regulation of small intestine smooth muscle contraction (GO:1904349)	99.98	0.0132
regulation of small intestine smooth muscle contraction (GO:1904347)	99.98	0.0132
brain segmentation (GO:0035284)	99.98	0.0132
central nervous system segmentation (GO:0035283)	99.98	0.0132
insulin processing (GO:0030070)	99.98	0.0132
epidermal growth factor receptor signaling pathway (GO:0007173)	11.76	0.0134
regulation of system process (GO:0044057)	3.08	0.0136
peptidyl-tyrosine phosphorylation (GO:0018108)	6.12	0.0137
peptidyl-tyrosine modification (GO:0018212)	6	0.0144
regulation of neuronal synaptic plasticity (GO:0048168)	11.32	0.0144
cellular response to endogenous stimulus (GO:0071495)	2.34	0.0145
regulation of locomotion (GO:0040012)	2.49	0.0149
phosphate-containing compound metabolic process (GO:0006796)	1.96	0.0152
stem cell differentiation (GO:0048863)	5.88	0.0152
regulation of cellular component movement (GO:0051270)	2.48	0.0155
regulation of biological process (GO:0050789)	1.26	0.0156
phosphorus metabolic process (GO:0006793)	1.94	0.0159
negative regulation of receptor recycling (GO:0001920)	74.99	0.0165
platelet activating factor biosynthetic process (GO:0006663)	74.99	0.0165
endothelial cell-cell adhesion (GO:0071603)	74.99	0.0165
protein localization to secretory granule (GO:0033366)	74.99	0.0165
metanephric renal vesicle formation (GO:0072093)	74.99	0.0165
erythropoietin-mediated signaling pathway (GO:0038162)	74.99	0.0165
desmosome assembly (GO:0002159)	74.99	0.0165
regulation of Golgi inheritance (GO:0090170)	74.99	0.0165
retinal cell apoptotic process (GO:1990009)	74.99	0.0165
renal sodium ion absorption (GO:0070294)	74.99	0.0165
hematopoietic stem cell migration (GO:0035701)	74.99	0.0165
sequestering of TGFbeta in extracellular matrix (GO:0035583)	74.99	0.0165
taurine transport (GO:0015734)	74.99	0.0165
myeloid leukocyte cytokine production (GO:0061082)	74.99	0.0165
secretion by cell (GO:0032940)	2.43	0.0173
regulation of cell communication (GO:0010646)	1.65	0.0174
neuron differentiation (GO:0030182)	2.42	0.0175
lipid metabolic process (GO:0006629)	2.26	0.0178
cognition (GO:0050890)	4.03	0.0181
regulation of intracellular signal transduction (GO:1902531)	1.99	0.0182
negative regulation of DNA-binding transcription factor activity (GO:0043433)	5.49	0.0182
glial cell differentiation (GO:0010001)	5.45	0.0185
positive regulation of protein kinase B signaling (GO:0051897)	5.39	0.019
regulation of pathway-restricted SMAD protein phosphorylation (GO:0060393)	9.68	0.0192
regulation of glutamate receptor signaling pathway (GO:1900449)	9.68	0.0192
establishment of localization (GO:0051234)	1.57	0.0194
regulation of macroautophagy (GO:0016241)	5.32	0.0196
mast cell chemotaxis (GO:0002551)	59.99	0.0198
cellular response to indole-3-methanol (GO:0071681)	59.99	0.0198
response to indole-3-methanol (GO:0071680)	59.99	0.0198
reduction of food intake in response to dietary excess (GO:0002023)	59.99	0.0198
activated T cell proliferation (GO:0050798)	59.99	0.0198
positive regulation of long-term neuronal synaptic plasticity (GO:0048170)	59.99	0.0198
parkin-mediated stimulation of mitophagy in response to mitochondrial depolarization (GO:0061734)	59.99	0.0198
negative regulation of tubulin deacetylation (GO:1904428)	59.99	0.0198
caveolin-mediated endocytosis (GO:0072584)	59.99	0.0198
regulation of cation channel activity (GO:2001257)	5.2	0.0209
response to cadmium ion (GO:0046686)	9.23	0.0209
negative regulation of epithelial cell migration (GO:0010633)	9.23	0.0209
neurogenesis (GO:0022008)	2.05	0.0212
developmental process (GO:0032502)	1.48	0.0212
positive regulation of macroautophagy (GO:0016239)	9.09	0.0215
neuron projection morphogenesis (GO:0048812)	3.16	0.0217
regulation of cartilage development (GO:0061035)	8.95	0.0221
programmed cell death (GO:0012501)	2.31	0.0223
plasma membrane bounded cell projection morphogenesis (GO:0120039)	3.13	0.0224
regulation of cellular process (GO:0050794)	1.27	0.0227
cell projection morphogenesis (GO:0048858)	3.12	0.0227
protein localization to plasma membrane (GO:0072659)	5.03	0.0228
regulation of autophagy (GO:0010506)	3.75	0.0228
renal sodium ion transport (GO:0003096)	49.99	0.023
trachea formation (GO:0060440)	49.99	0.023
myeloid progenitor cell differentiation (GO:0002318)	49.99	0.023
renal vesicle formation (GO:0072033)	49.99	0.023
cellular response to UV-C (GO:0071494)	49.99	0.023
5-phosphoribose 1-diphosphate biosynthetic process (GO:0006015)	49.99	0.023
insulin metabolic process (GO:1901142)	49.99	0.023
positive regulation of vascular smooth muscle cell differentiation (GO:1905065)	49.99	0.023
copper ion transmembrane transport (GO:0035434)	49.99	0.023
bundle of His cell-Purkinje myocyte adhesion involved in cell communication (GO:0086073)	49.99	0.023
negative regulation of protein export from nucleus (GO:0046826)	49.99	0.023
mast cell migration (GO:0097531)	49.99	0.023
positive regulation of gastro-intestinal system smooth muscle contraction (GO:1904306)	49.99	0.023
regulation of gastro-intestinal system smooth muscle contraction (GO:1904304)	49.99	0.023
ectodermal cell differentiation (GO:0010668)	49.99	0.023
retinal blood vessel morphogenesis (GO:0061304)	49.99	0.023
platelet activating factor metabolic process (GO:0046469)	49.99	0.023
ureteric bud elongation (GO:0060677)	49.99	0.023
5-phosphoribose 1-diphosphate metabolic process (GO:0046391)	49.99	0.023
activation of protein kinase activity (GO:0032147)	3.69	0.0239
peptidyl-amino acid modification (GO:0018193)	2.46	0.0241
ERBB signaling pathway (GO:0038127)	8.45	0.0246
regulation of ossification (GO:0030278)	4.86	0.0247
response to external stimulus (GO:0009605)	1.88	0.0248
glucose homeostasis (GO:0042593)	4.84	0.0251
regulation of neurotransmitter receptor activity (GO:0099601)	8.33	0.0252
carbohydrate homeostasis (GO:0033500)	4.81	0.0254
establishment or maintenance of cell polarity (GO:0007163)	4.81	0.0254
regulation of cation transmembrane transport (GO:1904062)	3.61	0.0256
regulation of signaling (GO:0023051)	1.63	0.0258
phosphatidylinositol-mediated signaling (GO:0048015)	8.22	0.0258
positive regulation of protein serine/threonine kinase activity (GO:0071902)	3.59	0.0261
positive regulation of megakaryocyte differentiation (GO:0045654)	42.85	0.0263
rhombomere development (GO:0021546)	42.85	0.0263
maintenance of protein location in extracellular region (GO:0071694)	42.85	0.0263
store-operated calcium entry (GO:0002115)	42.85	0.0263
negative regulation of interleukin-8 secretion (GO:2000483)	42.85	0.0263
macropinocytosis (GO:0044351)	42.85	0.0263
cellular response to erythropoietin (GO:0036018)	42.85	0.0263
positive regulation of metallopeptidase activity (GO:1905050)	42.85	0.0263
cardiac muscle cell-cardiac muscle cell adhesion (GO:0086042)	42.85	0.0263
ethanolamine-containing compound metabolic process (GO:0042439)	42.85	0.0263
ectopic germ cell programmed cell death (GO:0035234)	42.85	0.0263
positive regulation of sensory perception of pain (GO:1904058)	42.85	0.0263
cell part morphogenesis (GO:0032990)	2.99	0.0267
regulation of ion transport (GO:0043269)	2.63	0.027
regulation of protein serine/threonine kinase activity (GO:0071900)	2.98	0.0271
sensory perception of pain (GO:0019233)	8	0.0271
inositol lipid-mediated signaling (GO:0048017)	7.89	0.0278
response to acid chemical (GO:0001101)	3.49	0.0286
cell morphogenesis (GO:0000902)	2.58	0.0292
DNA damage induced protein phosphorylation (GO:0006975)	37.49	0.0295
bone trabecula formation (GO:0060346)	37.49	0.0295
protein localization to extracellular region (GO:0071692)	37.49	0.0295
Bergmann glial cell differentiation (GO:0060020)	37.49	0.0295
positive regulation of histone phosphorylation (GO:0033129)	37.49	0.0295
pyrimidine dimer repair (GO:0006290)	37.49	0.0295
positive regulation of mitophagy in response to mitochondrial depolarization (GO:0098779)	37.49	0.0295
glial cell-derived neurotrophic factor receptor signaling pathway (GO:0035860)	37.49	0.0295
xenobiotic transport (GO:0042908)	37.49	0.0295
CD8-positive, alpha-beta T cell differentiation (GO:0043374)	37.49	0.0295
response to erythropoietin (GO:0036017)	37.49	0.0295
positive regulation of cytokine secretion involved in immune response (GO:0002741)	37.49	0.0295
chemical homeostasis (GO:0048878)	2.19	0.0297
membrane lipid metabolic process (GO:0006643)	4.5	0.0301
regulation of signal transduction (GO:0009966)	1.65	0.0303
cellular response to UV (GO:0034644)	7.5	0.0305
secretion (GO:0046903)	2.18	0.0306
regulation of biological quality (GO:0065008)	1.57	0.0314
adherens junction organization (GO:0034332)	7.32	0.0319
cellular response to organic substance (GO:0071310)	1.82	0.0322
stem cell development (GO:0048864)	7.23	0.0326
facial nerve structural organization (GO:0021612)	33.33	0.0327
immature B cell differentiation (GO:0002327)	33.33	0.0327
positive regulation of mitophagy (GO:1901526)	33.33	0.0327
negative regulation of adenylate cyclase-activating G protein-coupled receptor signaling pathway (GO:0106072)	33.33	0.0327
thrombin-activated receptor signaling pathway (GO:0070493)	33.33	0.0327
actin filament severing (GO:0051014)	33.33	0.0327
sequestering of extracellular ligand from receptor (GO:0035581)	33.33	0.0327
outer ear morphogenesis (GO:0042473)	33.33	0.0327
germ cell migration (GO:0008354)	33.33	0.0327
heparin metabolic process (GO:0030202)	33.33	0.0327
cardiac neural crest cell development involved in heart development (GO:0061308)	33.33	0.0327
cardiac neural crest cell differentiation involved in heart development (GO:0061307)	33.33	0.0327
cellular response to chemical stimulus (GO:0070887)	1.7	0.033
generation of neurons (GO:0048699)	1.98	0.0336
positive regulation of phosphatidylinositol 3-kinase signaling (GO:0014068)	7.06	0.034
Golgi vesicle transport (GO:0048193)	3.29	0.0344
feeding behavior (GO:0007631)	6.98	0.0347
axonogenesis (GO:0007409)	3.28	0.0347
response to mechanical stimulus (GO:0009612)	4.24	0.0348
gliogenesis (GO:0042063)	4.24	0.0348
MAPK cascade (GO:0000165)	3.26	0.0353
positive regulation of muscle cell differentiation (GO:0051149)	6.9	0.0354
cytoskeletal anchoring at plasma membrane (GO:0007016)	29.99	0.036
ornithine metabolic process (GO:0006591)	29.99	0.036
opioid receptor signaling pathway (GO:0038003)	29.99	0.036
maintenance of epithelial cell apical/basal polarity (GO:0045199)	29.99	0.036
regulation of tubulin deacetylation (GO:0090043)	29.99	0.036
CD8-positive, alpha-beta T cell activation (GO:0036037)	29.99	0.036
phospholipid homeostasis (GO:0055091)	29.99	0.036
programmed cell death involved in cell development (GO:0010623)	29.99	0.036
maintenance of apical/basal cell polarity (GO:0035090)	29.99	0.036
desmosome organization (GO:0002934)	29.99	0.036
dendritic spine maintenance (GO:0097062)	29.99	0.036
cellular chemical homeostasis (GO:0055082)	2.45	0.0362
response to metal ion (GO:0010038)	3.23	0.0365
regulation of protein kinase B signaling (GO:0051896)	4.13	0.0373
leukocyte proliferation (GO:0070661)	6.67	0.0376
system development (GO:0048731)	1.51	0.0378
cardiac conduction (GO:0061337)	6.59	0.0384
response to chemical (GO:0042221)	1.5	0.0386
cell differentiation (GO:0030154)	1.56	0.0389
positive regulation of digestive system process (GO:0060456)	27.27	0.0392
trachea morphogenesis (GO:0060439)	27.27	0.0392
pinocytosis (GO:0006907)	27.27	0.0392
facial nerve morphogenesis (GO:0021610)	27.27	0.0392
facial nerve development (GO:0021561)	27.27	0.0392
metanephric renal vesicle morphogenesis (GO:0072283)	27.27	0.0392
receptor recycling (GO:0001881)	27.27	0.0392
sequestering of actin monomers (GO:0042989)	27.27	0.0392
extracellular negative regulation of signal transduction (GO:1900116)	27.27	0.0392
extracellular regulation of signal transduction (GO:1900115)	27.27	0.0392
bone trabecula morphogenesis (GO:0061430)	27.27	0.0392
retina vasculature morphogenesis in camera-type eye (GO:0061299)	27.27	0.0392
protein localization to cell periphery (GO:1990778)	4.02	0.0399
phosphorylation (GO:0016310)	2.07	0.04
cellular protein modification process (GO:0006464)	1.65	0.0402
protein modification process (GO:0036211)	1.65	0.0402
regulation of multicellular organismal process (GO:0051239)	1.65	0.0403
phospholipase C-activating G protein-coupled receptor signaling pathway (GO:0007200)	6.31	0.0414
response to antineoplastic agent (GO:0097327)	6.31	0.0414
regulation of transmembrane receptor protein serine/threonine kinase signaling pathway (GO:0090092)	3.95	0.0417
signal transduction by protein phosphorylation (GO:0023014)	3.08	0.0418
cranial nerve structural organization (GO:0021604)	25	0.0424
lymphoid progenitor cell differentiation (GO:0002320)	25	0.0424
disaccharide metabolic process (GO:0005984)	25	0.0424
negative regulation of multicellular organism growth (GO:0040015)	25	0.0424
Golgi ribbon formation (GO:0090161)	25	0.0424
regulation of adenylate cyclase-activating G protein-coupled receptor signaling pathway (GO:0106070)	25	0.0424
positive regulation of smooth muscle cell differentiation (GO:0051152)	25	0.0424
positive regulation of autophagy of mitochondrion in response to mitochondrial depolarization (GO:1904925)	25	0.0424
regulation of bile acid metabolic process (GO:1904251)	25	0.0424
lipid biosynthetic process (GO:0008610)	2.62	0.0428
pathway-restricted SMAD protein phosphorylation (GO:0060389)	23.07	0.0455
estrogen biosynthetic process (GO:0006703)	23.07	0.0455
renal vesicle morphogenesis (GO:0072077)	23.07	0.0455
regulation of histone phosphorylation (GO:0033127)	23.07	0.0455
protein kinase C signaling (GO:0070528)	23.07	0.0455
hepatocyte differentiation (GO:0070365)	23.07	0.0455
regulation of autophagy of mitochondrion in response to mitochondrial depolarization (GO:1904923)	23.07	0.0455
positive regulation of pseudopodium assembly (GO:0031274)	23.07	0.0455
regulation of metallopeptidase activity (GO:1905048)	23.07	0.0455
bundle of His cell to Purkinje myocyte communication (GO:0086069)	23.07	0.0455
negative regulation of keratinocyte proliferation (GO:0010839)	23.07	0.0455
dermatan sulfate metabolic process (GO:0030205)	23.07	0.0455
axon development (GO:0061564)	2.99	0.0458
ion homeostasis (GO:0050801)	2.31	0.046
post-Golgi vesicle-mediated transport (GO:0006892)	5.94	0.0461
transforming growth factor beta receptor signaling pathway (GO:0007179)	5.94	0.0461
exocytosis (GO:0006887)	2.3	0.0467
positive regulation of transmembrane receptor protein serine/threonine kinase signaling pathway (GO:0090100)	5.82	0.0477
regulation of multi-organism process (GO:0043900)	2.95	0.0479
positive regulation of protein phosphorylation (GO:0001934)	2.11	0.0483
regulation of heart contraction (GO:0008016)	3.7	0.0486
regulation of secretion (GO:0051046)	2.28	0.0487
DNA damage response, signal transduction by p53 class mediator resulting in transcription of p21 class mediator (GO:0006978)	21.42	0.0487
cellular copper ion homeostasis (GO:0006878)	21.42	0.0487
renal vesicle development (GO:0072087)	21.42	0.0487
establishment of epithelial cell apical/basal polarity (GO:0045198)	21.42	0.0487
detection of mechanical stimulus involved in sensory perception of sound (GO:0050910)	21.42	0.0487
renal absorption (GO:0070293)	21.42	0.0487
positive regulation of urine volume (GO:0035810)	21.42	0.0487
regulation of pseudopodium assembly (GO:0031272)	21.42	0.0487
regulation of vascular smooth muscle cell differentiation (GO:1905063)	21.42	0.0487
positive regulation of macrophage chemotaxis (GO:0010759)	21.42	0.0487
chondroitin sulfate catabolic process (GO:0030207)	21.42	0.0487
type B pancreatic cell development (GO:0003323)	21.42	0.0487
cardiac left ventricle morphogenesis (GO:0003214)	21.42	0.0487
cellular response to dopamine (GO:1903351)	21.42	0.0487
regulation of protein localization (GO:0032880)	2.1	0.0491
neuropeptide signaling pathway (GO:0007218)	5.71	0.0494

## Sheet: Up-regulation_2Gy_24h_vs_EMTAB2
GO biological process complete	upload_1 (fold Enrichment)	upload_1 (raw P-value)
signal transduction by p53 class mediator (GO:0072331)	10.38	7.28e-06
cell death (GO:0008219)	3.18	8.65e-06
programmed cell death (GO:0012501)	3.11	2.02e-05
regulation of autophagy (GO:0010506)	5.05	9.18e-05
DNA damage response, signal transduction by p53 class mediator (GO:0030330)	11.08	0.000117
intrinsic apoptotic signaling pathway (GO:0097193)	7.13	0.000244
response to external stimulus (GO:0009605)	2.16	0.000246
signal transduction in response to DNA damage (GO:0042770)	8.55	0.000369
intracellular signal transduction (GO:0035556)	2.25	0.000449
positive regulation of autophagy (GO:0010508)	7.8	0.00055
apoptotic process (GO:0006915)	2.77	0.000579
mitotic G1/S transition checkpoint (GO:0044819)	10.88	0.00062
mitotic G1 DNA damage checkpoint (GO:0031571)	10.88	0.00062
G1 DNA damage checkpoint (GO:0044783)	10.71	0.000654
cellular response to UV-C (GO:0071494)	59.82	0.000834
positive regulation of cellular catabolic process (GO:0031331)	4.01	0.000999
membrane lipid metabolic process (GO:0006643)	5.38	0.00102
regulation of programmed cell death (GO:0043067)	2.2	0.00113
cellular response to UV (GO:0034644)	8.97	0.00123
cellular response to stimulus (GO:0051716)	1.45	0.0018
response to organic substance (GO:0010033)	1.78	0.00182
biological regulation (GO:0065007)	1.24	0.00185
dendrite extension (GO:0097484)	35.89	0.00194
regulation of cellular catabolic process (GO:0031329)	2.64	0.00214
mitotic cell cycle checkpoint (GO:0007093)	5.64	0.00221
cellular response to amino acid starvation (GO:0034198)	11.96	0.00239
mitotic DNA damage checkpoint (GO:0044773)	7.32	0.00251
cellular response to organic substance (GO:0071310)	1.87	0.00264
regulation of gastric acid secretion (GO:0060453)	29.91	0.00265
negative regulation of multicellular organism growth (GO:0040015)	29.91	0.00265
cell communication (GO:0007154)	1.5	0.0028
response to endogenous stimulus (GO:0009719)	2.13	0.00281
response to amino acid starvation (GO:1990928)	11.22	0.00285
positive regulation of catabolic process (GO:0009896)	3.38	0.00286
Unclassified (UNCLASSIFIED)	0.39	0.00287
biological_process (GO:0008150)	1.11	0.00287
cellular carbohydrate metabolic process (GO:0044262)	5.28	0.00293
regulation of cell death (GO:0010941)	2.03	0.00304
lactate metabolic process (GO:0006089)	27.61	0.00305
cellular response to radiation (GO:0071478)	5.19	0.00315
intrinsic apoptotic signaling pathway by p53 class mediator (GO:0072332)	10.77	0.00318
negative regulation of G1/S transition of mitotic cell cycle (GO:2000134)	6.84	0.00319
mitotic DNA integrity checkpoint (GO:0044774)	6.71	0.0034
negative regulation of developmental growth (GO:0048640)	6.71	0.0034
DNA damage response, signal transduction by p53 class mediator resulting in transcription of p21 class mediator (GO:0006978)	25.64	0.00347
cellular response to ethanol (GO:0071361)	25.64	0.00347
glycolipid metabolic process (GO:0006664)	6.65	0.00351
negative regulation of cell cycle G1/S phase transition (GO:1902807)	6.65	0.00351
liposaccharide metabolic process (GO:1903509)	6.59	0.00363
signaling (GO:0023052)	1.49	0.00371
glycogen metabolic process (GO:0005977)	10.16	0.00371
maintenance of protein location (GO:0045185)	6.53	0.00374
negative regulation of cellular protein localization (GO:1903828)	6.47	0.00386
cellular glucan metabolic process (GO:0006073)	9.97	0.0039
glucan metabolic process (GO:0044042)	9.97	0.0039
response to UV-C (GO:0010225)	23.93	0.00392
DNA damage response, signal transduction resulting in transcription (GO:0042772)	23.93	0.00392
cellular response to DNA damage stimulus (GO:0006974)	2.58	0.00394
cellular response to light stimulus (GO:0071482)	6.35	0.00411
cellular response to chemical stimulus (GO:0070887)	1.72	0.00418
regulation of extrinsic apoptotic signaling pathway via death domain receptors (GO:1902041)	9.61	0.0043
epithelial cell-cell adhesion (GO:0090136)	22.43	0.0044
transport (GO:0006810)	1.52	0.00459
developmental growth involved in morphogenesis (GO:0060560)	6.14	0.00463
DNA damage response, signal transduction by p53 class mediator resulting in cell cycle arrest (GO:0006977)	9.28	0.00473
establishment of localization (GO:0051234)	1.52	0.00477
signal transduction involved in mitotic G1 DNA damage checkpoint (GO:0072431)	9.12	0.00495
signal transduction involved in mitotic cell cycle checkpoint (GO:0072413)	9.12	0.00495
signal transduction involved in mitotic DNA integrity checkpoint (GO:1902403)	9.12	0.00495
signal transduction involved in mitotic DNA damage checkpoint (GO:1902402)	9.12	0.00495
intracellular signal transduction involved in G1 DNA damage checkpoint (GO:1902400)	9.12	0.00495
regulation of biological process (GO:0050789)	1.24	0.00498
regulation of phosphatidylinositol 3-kinase signaling (GO:0014066)	5.98	0.00504
apoptotic signaling pathway (GO:0097190)	3.82	0.00541
glycogen catabolic process (GO:0005980)	19.94	0.00542
cell cycle checkpoint (GO:0000075)	4.53	0.0055
neuron projection extension (GO:1990138)	8.68	0.00564
glucan catabolic process (GO:0009251)	18.89	0.00597
regulation of apoptotic process (GO:0042981)	1.99	0.00653
cytokine production involved in immune response (GO:0002367)	17.95	0.00654
mitochondrion morphogenesis (GO:0070584)	17.95	0.00654
membrane lipid biosynthetic process (GO:0046467)	5.52	0.00662
cellular process (GO:0009987)	1.17	0.00665
protein autoubiquitination (GO:0051865)	8.16	0.00666
positive regulation of macroautophagy (GO:0016239)	8.16	0.00666
regulation of cell communication (GO:0010646)	1.58	0.00671
cellular polysaccharide catabolic process (GO:0044247)	17.09	0.00714
cellular response to amino acid stimulus (GO:0071230)	7.92	0.00721
energy reserve metabolic process (GO:0006112)	7.92	0.00721
regulation of signaling (GO:0023051)	1.56	0.00725
regulation of intracellular signal transduction (GO:1902531)	1.88	0.00741
cellular response to ionizing radiation (GO:0071479)	7.8	0.00749
intrinsic apoptotic signaling pathway in response to DNA damage (GO:0008630)	7.8	0.00749
DNA damage checkpoint (GO:0000077)	5.32	0.00752
cell part morphogenesis (GO:0032990)	2.86	0.00754
glycogen biosynthetic process (GO:0005978)	16.31	0.00776
glucan biosynthetic process (GO:0009250)	16.31	0.00776
response to stimulus (GO:0050896)	1.31	0.0078
cellular response to abiotic stimulus (GO:0071214)	3.51	0.00802
cellular response to environmental stimulus (GO:0104004)	3.51	0.00802
regulation of neurotransmitter receptor activity (GO:0099601)	7.48	0.00838
polysaccharide catabolic process (GO:0000272)	15.6	0.0084
signal transduction involved in DNA damage checkpoint (GO:0072422)	7.37	0.00869
signal transduction involved in DNA integrity checkpoint (GO:0072401)	7.37	0.00869
response to UV (GO:0009411)	5.09	0.00869
cellular response to stress (GO:0033554)	1.94	0.00891
signal transduction involved in cell cycle checkpoint (GO:0072395)	7.28	0.00901
negative regulation of protein localization to plasma membrane (GO:1903077)	14.95	0.00907
inositol phosphate-mediated signaling (GO:0048016)	14.95	0.00907
regulation of cellular process (GO:0050794)	1.23	0.00921
maintenance of protein location in cell (GO:0032507)	7.08	0.00966
cellular response to nutrient levels (GO:0031669)	3.92	0.00984
DNA integrity checkpoint (GO:0031570)	4.88	0.00999
negative regulation of protein localization to cell periphery (GO:1904376)	13.8	0.0105
regulation of DNA-binding transcription factor activity (GO:0051090)	2.94	0.0106
cellular polysaccharide metabolic process (GO:0044264)	6.81	0.0107
G protein-coupled receptor signaling pathway (GO:0007186)	0.14	0.0108
regulation of G1/S transition of mitotic cell cycle (GO:2000045)	4.75	0.0109
cellular response to starvation (GO:0009267)	4.75	0.0109
rhombomere 5 formation (GO:0021666)	> 100	0.0111
rhombomere 5 morphogenesis (GO:0021664)	> 100	0.0111
rhombomere 3 formation (GO:0021660)	> 100	0.0111
apoptotic process in bone marrow cell (GO:0071839)	> 100	0.0111
rhombomere formation (GO:0021594)	> 100	0.0111
negative regulation of activation of membrane attack complex (GO:0001971)	> 100	0.0111
immunoglobulin secretion involved in immune response (GO:0002380)	> 100	0.0111
dendritic cell cytokine production (GO:0002371)	> 100	0.0111
cellular response to vitamin B1 (GO:0071301)	> 100	0.0111
mast cell proliferation (GO:0070662)	> 100	0.0111
positive regulation of pyloric antrum smooth muscle contraction (GO:0120072)	> 100	0.0111
regulation of pyloric antrum smooth muscle contraction (GO:0120071)	> 100	0.0111
intermembrane sphingolipid transfer (GO:0120012)	> 100	0.0111
mitophagy by induced vacuole formation (GO:0035695)	> 100	0.0111
response to formaldehyde (GO:1904404)	> 100	0.0111
positive regulation of colon smooth muscle contraction (GO:1904343)	> 100	0.0111
regulation of colon smooth muscle contraction (GO:1904341)	> 100	0.0111
melanocyte adhesion (GO:0097326)	> 100	0.0111
cellular response to methyl methanesulfonate (GO:0072703)	> 100	0.0111
response to methyl methanesulfonate (GO:0072702)	> 100	0.0111
sphingolipid metabolic process (GO:0006665)	4.72	0.0112
cell-cell fusion (GO:0140253)	13.29	0.0112
syncytium formation by plasma membrane fusion (GO:0000768)	13.29	0.0112
cellular response to external stimulus (GO:0071496)	3.25	0.0113
response to alcohol (GO:0097305)	3.74	0.0118
localization (GO:0051179)	1.39	0.012
ceramide metabolic process (GO:0006672)	6.49	0.0122
polysaccharide metabolic process (GO:0005976)	6.49	0.0122
regulation of catabolic process (GO:0009894)	2.21	0.0123
regulation of heart contraction (GO:0008016)	3.69	0.0124
positive regulation of cell cycle arrest (GO:0071158)	6.41	0.0125
syncytium formation (GO:0006949)	12.38	0.0127
cellular response to gamma radiation (GO:0071480)	12.38	0.0127
glucose catabolic process (GO:0006007)	12.38	0.0127
intrinsic apoptotic signaling pathway in response to DNA damage by p53 class mediator (GO:0042771)	12.38	0.0127
eating behavior (GO:0042755)	12.38	0.0127
cell development (GO:0048468)	1.9	0.0129
cellular response to cytokine stimulus (GO:0071345)	2.18	0.013
cellular response to alcohol (GO:0097306)	6.26	0.0133
synaptic transmission, glutamatergic (GO:0035249)	11.96	0.0135
prostaglandin metabolic process (GO:0006693)	11.58	0.0144
prostanoid metabolic process (GO:0006692)	11.58	0.0144
Golgi to plasma membrane protein transport (GO:0043001)	11.58	0.0144
developmental cell growth (GO:0048588)	6.05	0.0146
autophagy (GO:0006914)	3.52	0.015
process utilizing autophagic mechanism (GO:0061919)	3.52	0.015
sphingolipid biosynthetic process (GO:0030148)	5.98	0.015
negative regulation of protein localization to membrane (GO:1905476)	11.22	0.0152
cellular response to virus (GO:0098586)	11.22	0.0152
regulation of TORC1 signaling (GO:1903432)	11.22	0.0152
learning or memory (GO:0007611)	3.49	0.0154
cell growth (GO:0016049)	5.92	0.0154
maintenance of location (GO:0051235)	4.27	0.0155
regulation of cell cycle G1/S phase transition (GO:1902806)	4.27	0.0155
regulation of macroautophagy (GO:0016241)	4.25	0.0158
cellular component organization (GO:0016043)	1.38	0.0159
behavior (GO:0007610)	2.49	0.0162
signal transduction (GO:0007165)	1.41	0.0164
cellular response to extracellular stimulus (GO:0031668)	3.44	0.0164
quinolinate catabolic process (GO:0034213)	89.73	0.0165
positive regulation of gastric acid secretion (GO:0060454)	89.73	0.0165
negative regulation of growth hormone receptor signaling pathway (GO:0060400)	89.73	0.0165
rhombomere 3 morphogenesis (GO:0021658)	89.73	0.0165
rhombomere morphogenesis (GO:0021593)	89.73	0.0165
Kit signaling pathway (GO:0038109)	89.73	0.0165
mast cell cytokine production (GO:0032762)	89.73	0.0165
regulation of Fas signaling pathway (GO:1902044)	89.73	0.0165
protein localization to pericentriolar material (GO:1905793)	89.73	0.0165
inactivation of MAPKK activity (GO:0051389)	89.73	0.0165
transcription factor catabolic process (GO:0036369)	89.73	0.0165
cellular response to stem cell factor stimulus (GO:0036216)	89.73	0.0165
response to stem cell factor (GO:0036215)	89.73	0.0165
negative regulation of cardiac muscle tissue regeneration (GO:1905179)	89.73	0.0165
regulation of cardiac muscle tissue regeneration (GO:1905178)	89.73	0.0165
early endosome to recycling endosome transport (GO:0061502)	89.73	0.0165
melanocyte migration (GO:0097324)	89.73	0.0165
regulation of locomotor rhythm (GO:1904059)	89.73	0.0165
carbohydrate metabolic process (GO:0005975)	2.68	0.0168
regulation of system process (GO:0044057)	2.46	0.0173
positive regulation of DNA-binding transcription factor activity (GO:0051091)	3.39	0.0173
Golgi vesicle transport (GO:0048193)	2.95	0.0173
bicellular tight junction assembly (GO:0070830)	10.25	0.0179
negative regulation of extrinsic apoptotic signaling pathway via death domain receptors (GO:1902042)	10.25	0.0179
hexose transmembrane transport (GO:0008645)	10.25	0.0179
membrane lipid catabolic process (GO:0046466)	10.25	0.0179
response to oxygen-containing compound (GO:1901700)	1.89	0.0181
maintenance of location in cell (GO:0051651)	5.55	0.0182
cellular response to alkaloid (GO:0071312)	9.97	0.0188
tight junction organization (GO:0120193)	9.97	0.0188
tight junction assembly (GO:0120192)	9.97	0.0188
protein localization to plasma membrane (GO:0072659)	4.01	0.019
monosaccharide transmembrane transport (GO:0015749)	9.7	0.0197
response to cytokine (GO:0034097)	2	0.0198
plasma membrane bounded cell projection organization (GO:0120036)	1.99	0.0202
cellular metabolic process (GO:0044237)	1.29	0.0204
regulation of signal transduction (GO:0009966)	1.53	0.0207
response to nutrient levels (GO:0031667)	2.56	0.021
carbohydrate transmembrane transport (GO:0034219)	9.2	0.0217
glycolytic process (GO:0006096)	9.2	0.0217
cellular carbohydrate catabolic process (GO:0044275)	9.2	0.0217
response to vitamin B1 (GO:0010266)	59.82	0.022
mast cell differentiation (GO:0060374)	59.82	0.022
rhombomere 5 development (GO:0021571)	59.82	0.022
rhombomere 3 development (GO:0021569)	59.82	0.022
methylglyoxal catabolic process to D-lactate via S-lactoyl-glutathione (GO:0019243)	59.82	0.022
regulation of activation of membrane attack complex (GO:0001969)	59.82	0.022
spermidine acetylation (GO:0032918)	59.82	0.022
polyamine acetylation (GO:0032917)	59.82	0.022
suppression by virus of host apoptotic process (GO:0019050)	59.82	0.022
ureteric bud invasion (GO:0072092)	59.82	0.022
modulation by host of viral RNA genome replication (GO:0044830)	59.82	0.022
regulation of kainate selective glutamate receptor activity (GO:2000312)	59.82	0.022
methylglyoxal catabolic process (GO:0051596)	59.82	0.022
putrescine catabolic process (GO:0009447)	59.82	0.022
negative regulation of myofibroblast differentiation (GO:1904761)	59.82	0.022
methylglyoxal catabolic process to lactate (GO:0061727)	59.82	0.022
positive regulation of small intestine smooth muscle contraction (GO:1904349)	59.82	0.022
regulation of small intestine smooth muscle contraction (GO:1904347)	59.82	0.022
brain segmentation (GO:0035284)	59.82	0.022
central nervous system segmentation (GO:0035283)	59.82	0.022
modulation by virus of host apoptotic process (GO:0039526)	59.82	0.022
cellular response to actinomycin D (GO:0072717)	59.82	0.022
response to virus (GO:0009615)	3.17	0.0222
cell-cell junction assembly (GO:0007043)	5.13	0.0222
negative regulation of intracellular signal transduction (GO:1902532)	2.52	0.0224
response to starvation (GO:0042594)	3.8	0.0226
regulation of digestive system process (GO:0044058)	8.97	0.0227
fat cell differentiation (GO:0045444)	5.03	0.0233
ATP generation from ADP (GO:0006757)	8.75	0.0237
regulation of protein export from nucleus (GO:0046825)	8.75	0.0237
regulation of blood circulation (GO:1903522)	3.1	0.024
NAD metabolic process (GO:0019674)	8.55	0.0248
regulation of nucleocytoplasmic transport (GO:0046822)	4.89	0.025
regulation of cellular metabolic process (GO:0031323)	1.33	0.0252
regulation of cell cycle arrest (GO:0071156)	4.85	0.0256
secretion by cell (GO:0032940)	2	0.0264
cognition (GO:0050890)	3.01	0.0269
cellular polysaccharide biosynthetic process (GO:0033692)	8.16	0.0269
polysaccharide biosynthetic process (GO:0000271)	8.16	0.0269
negative regulation by symbiont of host apoptotic process (GO:0033668)	44.86	0.0274
negative regulation of receptor recycling (GO:0001920)	44.86	0.0274
cellular process regulating host cell cycle in response to virus (GO:0060154)	44.86	0.0274
endothelial cell-cell adhesion (GO:0071603)	44.86	0.0274
traversing start control point of mitotic cell cycle (GO:0007089)	44.86	0.0274
metanephric renal vesicle formation (GO:0072093)	44.86	0.0274
negative regulation by organism of programmed cell death in other organism involved in symbiotic interaction (GO:0052490)	44.86	0.0274
erythropoietin-mediated signaling pathway (GO:0038162)	44.86	0.0274
polyamine catabolic process (GO:0006598)	44.86	0.0274
negative regulation of appetite by leptin-mediated signaling pathway (GO:0038108)	44.86	0.0274
desmosome assembly (GO:0002159)	44.86	0.0274
response to water-immersion restraint stress (GO:1990785)	44.86	0.0274
interleukin-17 production (GO:0032620)	44.86	0.0274
negative regulation by symbiont of host programmed cell death (GO:0052041)	44.86	0.0274
retinal cell apoptotic process (GO:1990009)	44.86	0.0274
renal sodium ion absorption (GO:0070294)	44.86	0.0274
immunoglobulin secretion (GO:0048305)	44.86	0.0274
hematopoietic stem cell migration (GO:0035701)	44.86	0.0274
regulation of myofibroblast differentiation (GO:1904760)	44.86	0.0274
ER to Golgi ceramide transport (GO:0035621)	44.86	0.0274
sequestering of TGFbeta in extracellular matrix (GO:0035583)	44.86	0.0274
myo-inositol transport (GO:0015798)	44.86	0.0274
response to actinomycin D (GO:0072716)	44.86	0.0274
myeloid leukocyte cytokine production (GO:0061082)	44.86	0.0274
intestinal epithelial cell maturation (GO:0060574)	44.86	0.0274
detection of mechanical stimulus (GO:0050982)	7.98	0.028
apical junction assembly (GO:0043297)	7.98	0.028
excretion (GO:0007588)	7.98	0.028
cellular response to organonitrogen compound (GO:0071417)	2.4	0.0282
response to extracellular stimulus (GO:0009991)	2.4	0.0285
response to amino acid (GO:0043200)	4.64	0.0286
response to light stimulus (GO:0009416)	2.96	0.0286
ceramide biosynthetic process (GO:0046513)	7.8	0.0291
cellular component organization or biogenesis (GO:0071840)	1.34	0.0292
epidermis development (GO:0008544)	2.61	0.0293
endoplasmic reticulum to Golgi vesicle-mediated transport (GO:0006888)	3.48	0.0295
cellular response to antibiotic (GO:0071236)	4.56	0.0298
carbohydrate catabolic process (GO:0016052)	4.56	0.0298
negative regulation of mitotic cell cycle (GO:0045930)	2.92	0.03
anatomical structure morphogenesis (GO:0009653)	1.62	0.0308
cellular response to toxic substance (GO:0097237)	3.43	0.0309
regulation of chondrocyte differentiation (GO:0032330)	7.48	0.0314
positive regulation of pathway-restricted SMAD protein phosphorylation (GO:0010862)	7.48	0.0314
negative regulation of endothelial cell migration (GO:0010596)	7.48	0.0314
neuron projection development (GO:0031175)	2.18	0.0322
response to mechanical stimulus (GO:0009612)	3.39	0.0323
ADP metabolic process (GO:0046031)	7.32	0.0325
establishment of protein localization to plasma membrane (GO:0061951)	7.32	0.0325
cytokine-mediated signaling pathway (GO:0019221)	2.17	0.0327
mast cell chemotaxis (GO:0002551)	35.89	0.0328
cellular response to indole-3-methanol (GO:0071681)	35.89	0.0328
response to indole-3-methanol (GO:0071680)	35.89	0.0328
reduction of food intake in response to dietary excess (GO:0002023)	35.89	0.0328
modulation by symbiont of host apoptotic process (GO:0052150)	35.89	0.0328
fructose 2,6-bisphosphate metabolic process (GO:0006003)	35.89	0.0328
activated T cell proliferation (GO:0050798)	35.89	0.0328
TRAIL-activated apoptotic signaling pathway (GO:0036462)	35.89	0.0328
positive regulation of long-term neuronal synaptic plasticity (GO:0048170)	35.89	0.0328
mitochondrial protein catabolic process (GO:0035694)	35.89	0.0328
parkin-mediated stimulation of mitophagy in response to mitochondrial depolarization (GO:0061734)	35.89	0.0328
negative regulation of tubulin deacetylation (GO:1904428)	35.89	0.0328
response to cycloheximide (GO:0046898)	35.89	0.0328
quinolinate metabolic process (GO:0046874)	35.89	0.0328
osteoclast fusion (GO:0072675)	35.89	0.0328
negative regulation of cellular process (GO:0048523)	1.39	0.0332
negative regulation of mitotic cell cycle phase transition (GO:1901991)	3.31	0.0347
hexose catabolic process (GO:0019320)	7.04	0.0349
epidermal growth factor receptor signaling pathway (GO:0007173)	7.04	0.0349
ovarian follicle development (GO:0001541)	7.04	0.0349
regulation of vascular smooth muscle cell proliferation (GO:1904705)	7.04	0.0349
response to hormone (GO:0009725)	2	0.035
regulation of protein kinase B signaling (GO:0051896)	3.29	0.0352
cell projection organization (GO:0030030)	1.92	0.0352
regulation of metabolic process (GO:0019222)	1.29	0.0362
regulation of localization (GO:0032879)	1.53	0.037
response to radiation (GO:0009314)	2.46	0.0373
regulation of neuronal synaptic plasticity (GO:0048168)	6.77	0.0374
renal sodium ion transport (GO:0003096)	29.91	0.0382
regulation of growth hormone receptor signaling pathway (GO:0060398)	29.91	0.0382
glutamine transport (GO:0006868)	29.91	0.0382
purine ribonucleoside bisphosphate biosynthetic process (GO:0034036)	29.91	0.0382
regulation of cilium beat frequency involved in ciliary motility (GO:0060296)	29.91	0.0382
regulation of cilium movement involved in cell motility (GO:0060295)	29.91	0.0382
myeloid progenitor cell differentiation (GO:0002318)	29.91	0.0382
renal vesicle formation (GO:0072033)	29.91	0.0382
modulation by organism of apoptotic process in other organism involved in symbiotic interaction (GO:0052433)	29.91	0.0382
positive regulation of glucokinase activity (GO:0033133)	29.91	0.0382
modulation of programmed cell death in other organism involved in symbiotic interaction (GO:0052248)	29.91	0.0382
modulation of apoptotic process in other organism (GO:0044532)	29.91	0.0382
modulation of programmed cell death in other organism (GO:0044531)	29.91	0.0382
regulation of cilium-dependent cell motility (GO:1902019)	29.91	0.0382
modulation by symbiont of host programmed cell death (GO:0052040)	29.91	0.0382
5-phosphoribose 1-diphosphate biosynthetic process (GO:0006015)	29.91	0.0382
3'-phosphoadenosine 5'-phosphosulfate biosynthetic process (GO:0050428)	29.91	0.0382
positive regulation of vascular smooth muscle cell differentiation (GO:1905065)	29.91	0.0382
positive regulation of xenophagy (GO:1904417)	29.91	0.0382
regulation of xenophagy (GO:1904415)	29.91	0.0382
bundle of His cell-Purkinje myocyte adhesion involved in cell communication (GO:0086073)	29.91	0.0382
negative regulation of protein export from nucleus (GO:0046826)	29.91	0.0382
mast cell migration (GO:0097531)	29.91	0.0382
positive regulation of gastro-intestinal system smooth muscle contraction (GO:1904306)	29.91	0.0382
regulation of gastro-intestinal system smooth muscle contraction (GO:1904304)	29.91	0.0382
ectodermal cell differentiation (GO:0010668)	29.91	0.0382
ureteric bud elongation (GO:0060677)	29.91	0.0382
5-phosphoribose 1-diphosphate metabolic process (GO:0046391)	29.91	0.0382
protein localization to cell periphery (GO:1990778)	3.2	0.0382
skeletal muscle cell differentiation (GO:0035914)	6.65	0.0386
skeletal muscle tissue development (GO:0007519)	4.08	0.0393
response to organonitrogen compound (GO:0010243)	1.94	0.0395
response to chemical (GO:0042221)	1.39	0.0395
organic hydroxy compound metabolic process (GO:1901615)	2.42	0.0397
response to gamma radiation (GO:0010332)	6.53	0.0399
regulation of transmembrane receptor protein serine/threonine kinase signaling pathway (GO:0090092)	3.15	0.0403
catabolic process (GO:0009056)	1.6	0.0409
negative regulation of biological process (GO:0048519)	1.34	0.0412
Golgi to plasma membrane transport (GO:0006893)	6.3	0.0424
regulation of I-kappaB kinase/NF-kappaB signaling (GO:0043122)	3.09	0.0425
cell-cell junction organization (GO:0045216)	3.93	0.043
negative regulation of cell cycle phase transition (GO:1901988)	3.08	0.043
exocytosis (GO:0006887)	2.07	0.0432
positive regulation of megakaryocyte differentiation (GO:0045654)	25.64	0.0435
rhombomere development (GO:0021546)	25.64	0.0435
maintenance of protein location in extracellular region (GO:0071694)	25.64	0.0435
ceramide 1-phosphate transport (GO:1902389)	25.64	0.0435
store-operated calcium entry (GO:0002115)	25.64	0.0435
negative regulation of interleukin-8 secretion (GO:2000483)	25.64	0.0435
columnar/cuboidal epithelial cell maturation (GO:0002069)	25.64	0.0435
positive regulation of neurotrophin TRK receptor signaling pathway (GO:0051388)	25.64	0.0435
putrescine metabolic process (GO:0009445)	25.64	0.0435
methylglyoxal metabolic process (GO:0009438)	25.64	0.0435
autophagic cell death (GO:0048102)	25.64	0.0435
cellular response to erythropoietin (GO:0036018)	25.64	0.0435
cardiac muscle cell-cardiac muscle cell adhesion (GO:0086042)	25.64	0.0435
ectopic germ cell programmed cell death (GO:0035234)	25.64	0.0435
positive regulation of sensory perception of pain (GO:1904058)	25.64	0.0435
positive regulation of hexokinase activity (GO:1903301)	25.64	0.0435
pyridine-containing compound catabolic process (GO:0072526)	25.64	0.0435
regulation of cysteine-type endopeptidase activity (GO:2000116)	3.05	0.0441
negative regulation of cell cycle (GO:0045786)	2.17	0.045
SMAD protein signal transduction (GO:0060395)	6.08	0.0451
nucleoside diphosphate phosphorylation (GO:0006165)	6.08	0.0451
cellular carbohydrate biosynthetic process (GO:0034637)	6.08	0.0451
cellular component morphogenesis (GO:0032989)	2.03	0.0456
skeletal muscle organ development (GO:0060538)	3.82	0.0461
cellular response to nitrogen compound (GO:1901699)	2.14	0.0478
purine ribonucleoside diphosphate metabolic process (GO:0009179)	5.88	0.0478
purine nucleoside diphosphate metabolic process (GO:0009135)	5.88	0.0478
nucleotide phosphorylation (GO:0046939)	5.88	0.0478
monosaccharide catabolic process (GO:0046365)	5.88	0.0478
bone trabecula formation (GO:0060346)	22.43	0.0488
protein localization to extracellular region (GO:0071692)	22.43	0.0488
cellular response to UV-B (GO:0071493)	22.43	0.0488
cellular response to hydroperoxide (GO:0071447)	22.43	0.0488
stress-induced premature senescence (GO:0090400)	22.43	0.0488
pyrimidine dimer repair (GO:0006290)	22.43	0.0488
positive regulation of mitophagy in response to mitochondrial depolarization (GO:0098779)	22.43	0.0488
glial cell-derived neurotrophic factor receptor signaling pathway (GO:0035860)	22.43	0.0488
CD8-positive, alpha-beta T cell differentiation (GO:0043374)	22.43	0.0488
response to erythropoietin (GO:0036017)	22.43	0.0488
multinuclear osteoclast differentiation (GO:0072674)	22.43	0.0488
regulation of pathway-restricted SMAD protein phosphorylation (GO:0060393)	5.79	0.0491
regulation of glutamate receptor signaling pathway (GO:1900449)	5.79	0.0491
autophagosome assembly (GO:0000045)	5.79	0.0491
positive regulation of cysteine-type endopeptidase activity (GO:2001056)	3.71	0.0493

## Sheet: Down-regulation_5cGy_24h_vs_EMT
GO biological process complete	upload_1 (fold Enrichment)	upload_1 (raw P-value)
DNA replication (GO:0006260)	34.71	3.68e-31
DNA metabolic process (GO:0006259)	13.5	5.78e-30
DNA-dependent DNA replication (GO:0006261)	52.19	1.63e-29
nucleic acid metabolic process (GO:0090304)	6.01	2.8e-27
nucleobase-containing compound metabolic process (GO:0006139)	5.23	6.51e-27
heterocycle metabolic process (GO:0046483)	5.02	7.78e-27
cellular aromatic compound metabolic process (GO:0006725)	4.95	1.5e-26
organic cyclic compound metabolic process (GO:1901360)	4.6	4.41e-25
cellular nitrogen compound metabolic process (GO:0034641)	4.43	4.71e-25
cell cycle (GO:0007049)	7.2	5.95e-20
cell cycle process (GO:0022402)	8.33	3.62e-18
mitotic cell cycle (GO:0000278)	10.03	4.22e-17
cellular response to DNA damage stimulus (GO:0006974)	9.27	4.24e-17
DNA repair (GO:0006281)	11.85	3.32e-16
mitotic cell cycle process (GO:1903047)	10.69	3.85e-16
nuclear DNA replication (GO:0033260)	73.93	9.01e-16
cell cycle DNA replication (GO:0044786)	72.13	1.12e-15
chromosome organization (GO:0051276)	7.14	2.86e-15
nitrogen compound metabolic process (GO:0006807)	2.37	4.68e-15
DNA replication initiation (GO:0006270)	83.17	1.07e-14
G1/S transition of mitotic cell cycle (GO:0000082)	30.07	1.71e-14
cell cycle G1/S phase transition (GO:0044843)	29.82	1.88e-14
macromolecule metabolic process (GO:0043170)	2.49	3.38e-14
cellular metabolic process (GO:0044237)	2.21	5.9e-14
cellular macromolecule biosynthetic process (GO:0034645)	5.03	6.45e-14
macromolecule biosynthetic process (GO:0009059)	4.87	1.41e-13
primary metabolic process (GO:0044238)	2.21	1.56e-13
organic substance metabolic process (GO:0071704)	2.15	3.17e-13
cell cycle phase transition (GO:0044770)	15.45	5.23e-13
cellular biosynthetic process (GO:0044249)	3.69	1.18e-12
cellular response to stress (GO:0033554)	4.78	2.11e-12
cellular macromolecule metabolic process (GO:0044260)	2.63	2.94e-12
organic substance biosynthetic process (GO:1901576)	3.53	3.98e-12
telomere organization (GO:0032200)	28.99	4.22e-12
mitotic cell cycle phase transition (GO:0044772)	14.79	6.5e-12
biosynthetic process (GO:0009058)	3.46	7.02e-12
metabolic process (GO:0008152)	2.01	7.53e-12
telomere maintenance via semi-conservative replication (GO:0032201)	79.62	1.45e-11
telomere maintenance (GO:0000723)	26.88	9.96e-11
double-strand break repair via homologous recombination (GO:0000724)	26.29	1.37e-09
recombinational repair (GO:0000725)	26	1.49e-09
DNA recombination (GO:0006310)	13.82	3.96e-09
DNA strand elongation involved in DNA replication (GO:0006271)	> 100	4.22e-09
regulation of DNA replication (GO:0006275)	21.91	5.27e-09
double-strand break repair (GO:0006302)	15.38	1.03e-08
translesion synthesis (GO:0019985)	43.28	1.14e-08
DNA strand elongation (GO:0022616)	77.82	1.52e-08
error-prone translesion synthesis (GO:0042276)	73.93	1.9e-08
response to stress (GO:0006950)	2.72	2.05e-08
DNA duplex unwinding (GO:0032508)	24.64	2.36e-08
cell cycle checkpoint (GO:0000075)	13.44	3.15e-08
regulation of cell cycle process (GO:0010564)	5.78	4.04e-08
DNA synthesis involved in DNA repair (GO:0000731)	34.12	4.16e-08
interstrand cross-link repair (GO:0036297)	34.12	4.16e-08
postreplication repair (GO:0006301)	33.48	4.62e-08
regulation of DNA-dependent DNA replication (GO:0090329)	33.48	4.62e-08
DNA geometric change (GO:0032392)	22.02	4.88e-08
DNA integrity checkpoint (GO:0031570)	16.09	5.15e-08
regulation of cell cycle (GO:0051726)	4.49	6.43e-08
DNA unwinding involved in DNA replication (GO:0006268)	> 100	1.57e-07
regulation of metabolic process (GO:0019222)	1.95	2.43e-07
regulation of mitotic cell cycle (GO:0007346)	5.99	2.49e-07
regulation of macromolecule metabolic process (GO:0060255)	2.02	2.5e-07
anatomical structure homeostasis (GO:0060249)	8.72	2.58e-07
response to radiation (GO:0009314)	7.43	2.96e-07
DNA damage response, detection of DNA damage (GO:0042769)	37.91	3.69e-07
DNA conformation change (GO:0071103)	9.86	4e-07
DNA replication checkpoint (GO:0000076)	73.93	5.51e-07
error-free translesion synthesis (GO:0070987)	62.26	9.99e-07
cellular process (GO:0009987)	1.35	1.15e-06
mitotic cell cycle checkpoint (GO:0007093)	13.02	1.45e-06
organelle organization (GO:0006996)	2.48	1.75e-06
nucleotide-excision repair, DNA gap filling (GO:0006297)	51.43	1.96e-06
mitotic DNA integrity checkpoint (GO:0044774)	16.58	2.25e-06
DNA biosynthetic process (GO:0071897)	15.84	2.89e-06
regulation of cellular metabolic process (GO:0031323)	1.91	2.95e-06
regulation of nucleobase-containing compound metabolic process (GO:0019219)	2.25	3.12e-06
regulation of transcription involved in G1/S transition of mitotic cell cycle (GO:0000083)	42.25	3.97e-06
negative regulation of cell cycle (GO:0045786)	5.61	4.3e-06
positive regulation of DNA-directed DNA polymerase activity (GO:1900264)	> 100	4.33e-06
regulation of DNA-directed DNA polymerase activity (GO:1900262)	> 100	4.33e-06
mitotic DNA replication (GO:1902969)	> 100	4.33e-06
regulation of cell cycle checkpoint (GO:1901976)	35.84	7.19e-06
nucleic acid phosphodiester bond hydrolysis (GO:0090305)	8.05	7.9e-06
nucleotide-excision repair, DNA incision, 5'-to lesion (GO:0006296)	31.97	1.09e-05
regulation of mitotic cell cycle phase transition (GO:1901990)	6.43	1.21e-05
nucleotide-excision repair, DNA incision (GO:0033683)	29.57	1.45e-05
regulation of nitrogen compound metabolic process (GO:0051171)	1.88	1.54e-05
regulation of primary metabolic process (GO:0080090)	1.87	1.57e-05
biological_process (GO:0008150)	1.18	1.59e-05
DNA-dependent DNA replication maintenance of fidelity (GO:0045005)	28.85	1.59e-05
negative regulation of cell cycle process (GO:0010948)	7.21	1.71e-05
regulation of cell cycle phase transition (GO:1901987)	5.94	2.22e-05
regulation of chromosome organization (GO:0033044)	6.86	2.44e-05
heterocycle biosynthetic process (GO:0018130)	3.58	3.05e-05
aromatic compound biosynthetic process (GO:0019438)	3.55	3.31e-05
regulation of DNA damage checkpoint (GO:2000001)	49.29	4.67e-05
mitotic recombination (GO:0006312)	46.69	5.4e-05
RNA splicing (GO:0008380)	6.05	5.79e-05
positive regulation of cell cycle process (GO:0090068)	7.16	6.21e-05
mRNA splicing, via spliceosome (GO:0000398)	7.11	6.48e-05
RNA splicing, via transesterification reactions with bulged adenosine as nucleophile (GO:0000377)	7.11	6.48e-05
RNA splicing, via transesterification reactions (GO:0000375)	7.04	6.9e-05
nucleobase-containing compound biosynthetic process (GO:0034654)	3.53	6.94e-05
regulation of cellular biosynthetic process (GO:0031326)	2.04	7.22e-05
regulation of gene silencing (GO:0060968)	11.73	8.07e-05
regulation of biosynthetic process (GO:0009889)	2	8.78e-05
negative regulation of mitotic cell cycle (GO:0045930)	6.74	8.98e-05
positive regulation of DNA biosynthetic process (GO:2000573)	17.4	0.000102
organic cyclic compound biosynthetic process (GO:1901362)	3.18	0.000109
DNA damage checkpoint (GO:0000077)	10.95	0.00011
regulation of macromolecule biosynthetic process (GO:0010556)	2.03	0.000114
meiotic cell cycle (GO:0051321)	7.96	0.000123
response to abiotic stimulus (GO:0009628)	3.33	0.000124
transcription-coupled nucleotide-excision repair (GO:0006283)	16.2	0.000133
negative regulation of cell cycle phase transition (GO:1901988)	7.62	0.000155
regulation of gene expression, epigenetic (GO:0040029)	7.62	0.000155
response to ionizing radiation (GO:0010212)	10.06	0.000162
positive regulation of mitotic cell cycle phase transition (GO:1901992)	14.97	0.000178
regulation of cellular macromolecule biosynthetic process (GO:2000112)	2.02	0.00018
regulation of DNA metabolic process (GO:0051052)	6	0.000182
regulation of G1/S transition of mitotic cell cycle (GO:2000045)	9.79	0.000183
positive regulation of mitotic cell cycle (GO:0045931)	9.6	0.0002
replication fork processing (GO:0031297)	28.62	0.000204
mRNA processing (GO:0006397)	5.02	0.000204
double-strand break repair via break-induced replication (GO:0000727)	> 100	0.000233
mRNA cis splicing, via spliceosome (GO:0045292)	26.88	0.000242
nucleocytoplasmic transport (GO:0006913)	6.96	0.000249
nuclear transport (GO:0051169)	6.88	0.000265
cellular component organization or biogenesis (GO:0071840)	1.74	0.000269
regulation of cell cycle G1/S phase transition (GO:1902806)	8.8	0.000296
maintenance of DNA methylation (GO:0010216)	98.57	0.000309
cellular nitrogen compound biosynthetic process (GO:0044271)	2.72	0.000326
regulation of chromatin silencing (GO:0031935)	23.35	0.000357
positive regulation of cell cycle phase transition (GO:1901989)	12.32	0.000364
cellular component organization (GO:0016043)	1.75	0.000382
negative regulation of DNA replication (GO:0008156)	22.75	0.000383
mitotic DNA damage checkpoint (GO:0044773)	12.07	0.000392
RNA metabolic process (GO:0016070)	2.67	0.000396
regulation of cyclin-dependent protein serine/threonine kinase activity (GO:0000079)	11.95	0.000407
biological regulation (GO:0065007)	1.35	0.000408
cell population proliferation (GO:0008283)	4.01	0.000413
regulation of signal transduction by p53 class mediator (GO:1901796)	8.12	0.000423
positive regulation of cell cycle (GO:0045787)	5.19	0.000432
regulation of cyclin-dependent protein kinase activity (GO:1904029)	11.48	0.00047
base-excision repair (GO:0006284)	20.63	0.000502
nucleotide-excision repair (GO:0006289)	10.95	0.000559
positive regulation of DNA metabolic process (GO:0051054)	7.62	0.000562
mRNA export from nucleus (GO:0006406)	10.85	0.000578
mRNA-containing ribonucleoprotein complex export from nucleus (GO:0071427)	10.85	0.000578
regulation of DNA biosynthetic process (GO:2000278)	10.85	0.000578
regulation of DNA endoreduplication (GO:0032875)	65.72	0.000604
regulation of double-strand break repair via homologous recombination (GO:0010569)	19.29	0.000605
regulation of gene expression (GO:0010468)	1.85	0.000664
mitotic DNA replication checkpoint (GO:0033314)	59.14	0.000723
DNA topological change (GO:0006265)	53.77	0.000853
regulation of response to DNA damage stimulus (GO:2001020)	6.88	0.000883
negative regulation of mitotic cell cycle phase transition (GO:1901991)	6.81	0.000919
spliceosomal complex assembly (GO:0000245)	16.13	0.000991
chromatin silencing at rDNA (GO:0000183)	49.29	0.000993
ribonucleoprotein complex export from nucleus (GO:0071426)	9.24	0.00103
negative regulation of macromolecule biosynthetic process (GO:0010558)	2.66	0.00105
ribonucleoprotein complex localization (GO:0071166)	9.17	0.00106
regulation of localization (GO:0032879)	0.11	0.00111
RNA export from nucleus (GO:0006405)	9.03	0.00112
positive regulation of leukocyte mediated immunity (GO:0002705)	8.89	0.00119
regulation of RNA splicing (GO:0043484)	8.7	0.00129
telomere maintenance via recombination (GO:0000722)	42.25	0.0013
cell division (GO:0051301)	4.24	0.00138
protein monoubiquitination (GO:0006513)	14.08	0.00144
negative regulation of cellular biosynthetic process (GO:0031327)	2.57	0.00145
response to UV (GO:0009411)	8.39	0.00146
regulation of alternative mRNA splicing, via spliceosome (GO:0000381)	13.65	0.00157
mitotic G1/S transition checkpoint (GO:0044819)	13.44	0.00164
mitotic G1 DNA damage checkpoint (GO:0031571)	13.44	0.00164
negative regulation of biosynthetic process (GO:0009890)	2.53	0.00167
G1 DNA damage checkpoint (GO:0044783)	13.24	0.00171
regulation of RNA metabolic process (GO:0051252)	1.85	0.00177
cellular response to stimulus (GO:0051716)	1.58	0.00185
protein export from nucleus (GO:0006611)	7.83	0.00187
negative regulation of cellular macromolecule biosynthetic process (GO:2000113)	2.61	0.002
somatic diversification of immunoglobulins involved in immune response (GO:0002208)	32.86	0.00205
somatic recombination of immunoglobulin genes involved in immune response (GO:0002204)	32.86	0.00205
isotype switching (GO:0045190)	32.86	0.00205
chromosome segregation (GO:0007059)	5.6	0.00214
mRNA transport (GO:0051028)	7.53	0.00215
mRNA metabolic process (GO:0016071)	3.48	0.00216
nuclear export (GO:0051168)	7.39	0.00229
response to stimulus (GO:0050896)	1.45	0.00233
regulation of double-strand break repair (GO:2000779)	11.67	0.00241
regulation of biological process (GO:0050789)	1.32	0.00258
nuclear division (GO:0000280)	5.36	0.00259
RNA processing (GO:0006396)	3.08	0.00259
negative regulation of gene expression, epigenetic (GO:0045814)	10.95	0.00287
somatic recombination of immunoglobulin gene segments (GO:0016447)	26.88	0.00295
mRNA 3'-end processing (GO:0031124)	10.82	0.00297
regulation of sister chromatid segregation (GO:0033045)	10.56	0.00318
cellular homeostasis (GO:0019725)	2.96	0.00337
RNA phosphodiester bond hydrolysis, endonucleolytic (GO:0090502)	10.32	0.00339
immunoglobulin production involved in immunoglobulin mediated immune response (GO:0002381)	23.66	0.00372
negative regulation of DNA-dependent DNA replication (GO:2000104)	23.66	0.00372
regulation of organelle organization (GO:0033043)	2.54	0.0038
DNA modification (GO:0006304)	9.86	0.00383
organelle fission (GO:0048285)	4.86	0.00388
regulation of nucleic acid-templated transcription (GO:1903506)	1.82	0.0039
regulation of RNA biosynthetic process (GO:2001141)	1.81	0.00396
regulation of chromatin organization (GO:1902275)	6.33	0.00396
cell communication (GO:0007154)	0.44	0.00397
regulation of cellular process (GO:0050794)	1.33	0.00413
regulation of mitotic nuclear division (GO:0007088)	6.23	0.00419
response to antineoplastic agent (GO:0097327)	9.34	0.00444
positive regulation of G2/M transition of mitotic cell cycle (GO:0010971)	21.12	0.00458
regulation of G2/M transition of mitotic cell cycle (GO:0010389)	6.04	0.00467
protein-DNA complex assembly (GO:0065004)	6	0.00475
RNA transport (GO:0050658)	6	0.00475
nucleic acid transport (GO:0050657)	6	0.00475
mitotic G2/M transition checkpoint (GO:0044818)	20.39	0.00489
positive regulation of chromosome segregation (GO:0051984)	20.39	0.00489
nucleobase-containing small molecule interconversion (GO:0015949)	20.39	0.00489
establishment of RNA localization (GO:0051236)	5.94	0.00492
regulation of mRNA splicing, via spliceosome (GO:0048024)	8.96	0.00496
telomere maintenance via telomere lengthening (GO:0010833)	19.71	0.0052
negative regulation of cell cycle G2/M phase transition (GO:1902750)	8.78	0.00524
regulation of leukocyte mediated immunity (GO:0002703)	5.83	0.00527
lymphocyte activation involved in immune response (GO:0002285)	8.61	0.00552
regulation of DNA recombination (GO:0000018)	8.61	0.00552
positive regulation of cell cycle G2/M phase transition (GO:1902751)	19.08	0.00553
somatic diversification of immune receptors via germline recombination within a single locus (GO:0002562)	19.08	0.00553
somatic cell DNA recombination (GO:0016444)	19.08	0.00553
signaling (GO:0023052)	0.45	0.00569
negative regulation of G1/S transition of mitotic cell cycle (GO:2000134)	8.45	0.00582
positive regulation of lymphocyte mediated immunity (GO:0002708)	8.37	0.00597
regulation of chromosome segregation (GO:0051983)	8.29	0.00612
import into nucleus (GO:0051170)	8.29	0.00612
somatic diversification of immunoglobulins (GO:0016445)	17.92	0.0062
regulation of cell cycle G2/M phase transition (GO:1902749)	5.55	0.00621
negative regulation of cell cycle G1/S phase transition (GO:1902807)	8.21	0.00627
regulation of nuclear division (GO:0051783)	5.53	0.00631
nuclear chromosome segregation (GO:0098813)	5.53	0.00631
positive regulation of immune effector process (GO:0002699)	5.5	0.00641
regulation of transcription, DNA-templated (GO:0006355)	1.76	0.00656
meiosis I (GO:0007127)	8.07	0.00659
B cell cytokine production (GO:0002368)	> 100	0.00673
cell cycle comprising mitosis without cytokinesis (GO:0033301)	> 100	0.00673
DNA strand elongation involved in nuclear cell cycle DNA replication (GO:1902319)	> 100	0.00673
hepatocyte dedifferentiation (GO:1990828)	> 100	0.00673
DNA strand elongation involved in cell cycle DNA replication (GO:1902296)	> 100	0.00673
isotype switching to IgG isotypes (GO:0048291)	> 100	0.00673
cellular response to putrescine (GO:1904586)	> 100	0.00673
response to putrescine (GO:1904585)	> 100	0.00673
regulation of ubiquinone biosynthetic process (GO:0010795)	> 100	0.00673
positive regulation of T cell mediated immune response to tumor cell (GO:0002842)	> 100	0.00673
DNA strand elongation involved in mitotic DNA replication (GO:1902983)	> 100	0.00673
mitotic DNA replication preinitiation complex assembly (GO:1902977)	> 100	0.00673
RNA localization (GO:0006403)	5.4	0.00683
mismatch repair (GO:0006298)	16.9	0.00691
cellular protein-containing complex assembly (GO:0034622)	2.85	0.00701
in utero embryonic development (GO:0001701)	4.21	0.00702
meiosis I cell cycle process (GO:0061982)	7.85	0.00708
positive regulation of G1/S transition of mitotic cell cycle (GO:1900087)	16.43	0.00728
gene expression (GO:0010467)	2.07	0.0075
deoxyribonucleotide metabolic process (GO:0009262)	15.98	0.00766
spliceosomal snRNP assembly (GO:0000387)	15.56	0.00804
protein-DNA complex subunit organization (GO:0071824)	5.03	0.00867
regulation of DNA repair (GO:0006282)	7.27	0.00869
response to external stimulus (GO:0009605)	0.14	0.00891
nucleobase-containing compound transport (GO:0015931)	4.91	0.00944
somatic diversification of immune receptors (GO:0002200)	14.08	0.00967
positive regulation of DNA endoreduplication (GO:0032877)	> 100	0.0101
cell cycle DNA replication maintenance of fidelity (GO:1902298)	> 100	0.0101
protein import into mitochondrial intermembrane space (GO:0045041)	> 100	0.0101
negative regulation of vascular smooth muscle cell differentiation involved in phenotypic switching (GO:1905931)	> 100	0.0101
negative regulation of cell differentiation involved in phenotypic switching (GO:1905916)	> 100	0.0101
mitotic DNA replication maintenance of fidelity (GO:1990505)	> 100	0.0101
resolution of mitotic recombination intermediates (GO:0071140)	> 100	0.0101
mitotic recombination-dependent replication fork processing (GO:1990426)	> 100	0.0101
regulation of chromatin silencing at telomere (GO:0031938)	> 100	0.0101
response to rapamycin (GO:1901355)	> 100	0.0101
positive regulation of telomerase RNA reverse transcriptase activity (GO:1905663)	> 100	0.0101
negative regulation of vascular associated smooth muscle cell apoptotic process (GO:1905460)	> 100	0.0101
eosinophil fate commitment (GO:0035854)	> 100	0.0101
nucleologenesis (GO:0017126)	> 100	0.0101
negative regulation of phenotypic switching (GO:1900240)	> 100	0.0101
chromosome breakage (GO:0031052)	> 100	0.0101
programmed DNA elimination (GO:0031049)	> 100	0.0101
heteroduplex formation (GO:0030491)	> 100	0.0101
regulation of primitive erythrocyte differentiation (GO:0010725)	> 100	0.0101
regulation of T cell mediated immune response to tumor cell (GO:0002840)	> 100	0.0101
DNA methylation on cytosine within a CG sequence (GO:0010424)	> 100	0.0101
B cell activation involved in immune response (GO:0002312)	13.75	0.0101
regulation of centrosome duplication (GO:0010824)	13.75	0.0101
regulation of cellular response to stress (GO:0080135)	2.92	0.0102
liver development (GO:0001889)	6.67	0.0109
RNA 3'-end processing (GO:0031123)	6.62	0.0111
positive regulation of T cell mediated immunity (GO:0002711)	12.86	0.0114
homeostatic process (GO:0042592)	2.18	0.0114
signal transduction (GO:0007165)	0.48	0.0116
stem cell population maintenance (GO:0019827)	6.52	0.0116
hepaticobiliary system development (GO:0061008)	6.52	0.0116
protein-containing complex localization (GO:0031503)	4.6	0.0117
regulation of mRNA processing (GO:0050684)	6.48	0.0118
sister chromatid segregation (GO:0000819)	6.43	0.012
maintenance of cell number (GO:0098727)	6.43	0.012
positive regulation of cell cycle G1/S phase transition (GO:1902808)	12.32	0.0124
negative regulation of RNA metabolic process (GO:0051253)	2.26	0.0126
sister chromatid cohesion (GO:0007062)	12.07	0.0128
DNA methylation (GO:0006306)	12.07	0.0128
DNA alkylation (GO:0006305)	12.07	0.0128
positive regulation of G2/MI transition of meiotic cell cycle (GO:0110032)	98.57	0.0134
regulation of G2/MI transition of meiotic cell cycle (GO:0110030)	98.57	0.0134
putrescine biosynthetic process from ornithine (GO:0033387)	98.57	0.0134
regulation of vascular smooth muscle cell differentiation involved in phenotypic switching (GO:1905930)	98.57	0.0134
regulation of cell differentiation involved in phenotypic switching (GO:1905915)	98.57	0.0134
DNA replication preinitiation complex assembly (GO:0071163)	98.57	0.0134
resolution of recombination intermediates (GO:0071139)	98.57	0.0134
regulation of telomerase RNA reverse transcriptase activity (GO:1905661)	98.57	0.0134
response to methotrexate (GO:0031427)	98.57	0.0134
response to sodium phosphate (GO:1904383)	98.57	0.0134
cellular response to vasopressin (GO:1904117)	98.57	0.0134
response to vasopressin (GO:1904116)	98.57	0.0134
eosinophil differentiation (GO:0030222)	98.57	0.0134
dihydrofolate metabolic process (GO:0046452)	98.57	0.0134
post-translational protein acetylation (GO:0034421)	98.57	0.0134
adaptive immune response based on somatic recombination of immune receptors built from immunoglobulin superfamily domains (GO:0002460)	4.38	0.0138
reciprocal meiotic recombination (GO:0007131)	11.6	0.0138
negative regulation of cellular process (GO:0048523)	1.59	0.014
homologous recombination (GO:0035825)	11.37	0.0143
cell surface receptor signaling pathway (GO:0007166)	0.24	0.0148
positive regulation of ATPase activity (GO:0032781)	11.16	0.0148
embryo development (GO:0009790)	2.5	0.0149
meiotic nuclear division (GO:0140013)	5.88	0.0152
regulation of megakaryocyte differentiation (GO:0045652)	10.95	0.0153
gene silencing (GO:0016458)	5.84	0.0155
regulation of lymphocyte mediated immunity (GO:0002706)	5.8	0.0158
regulation of mitotic metaphase/anaphase transition (GO:0030071)	10.75	0.0159
regulation of forebrain neuron differentiation (GO:2000977)	73.93	0.0167
traversing start control point of mitotic cell cycle (GO:0007089)	73.93	0.0167
C-5 methylation of cytosine (GO:0090116)	73.93	0.0167
DNA replication, removal of RNA primer (GO:0043137)	73.93	0.0167
strand invasion (GO:0042148)	73.93	0.0167
cellular response to camptothecin (GO:0072757)	73.93	0.0167
circadian regulation of translation (GO:0097167)	73.93	0.0167
regulation of transferase activity (GO:0051338)	2.44	0.0169
regulation of metaphase/anaphase transition of cell cycle (GO:1902099)	10.38	0.0169
RNA phosphodiester bond hydrolysis (GO:0090501)	5.58	0.0174
regulation of centrosome cycle (GO:0046605)	10.02	0.018
natural killer cell activation (GO:0030101)	10.02	0.018
chromatin silencing (GO:0006342)	9.86	0.0186
chromatin organization involved in negative regulation of transcription (GO:0097549)	9.86	0.0186
regulation of mitotic sister chromatid separation (GO:0010965)	9.7	0.0192
meiotic cell cycle process (GO:1903046)	5.38	0.0192
regulation of transport (GO:0051049)	0.16	0.0197
negative regulation of chromatin organization (GO:1905268)	9.54	0.0197
positive regulation of gene expression, epigenetic (GO:0045815)	9.54	0.0197
response to light stimulus (GO:0009416)	3.9	0.02
positive regulation of meiotic cell cycle phase transition (GO:1901995)	59.14	0.0201
DNA repair complex assembly (GO:0090735)	59.14	0.0201
positive regulation of T-helper 1 cell cytokine production (GO:2000556)	59.14	0.0201
regulation of T-helper 1 cell cytokine production (GO:2000554)	59.14	0.0201
DNA replication, synthesis of RNA primer (GO:0006269)	59.14	0.0201
response to camptothecin (GO:1901563)	59.14	0.0201
protein K27-linked ubiquitination (GO:0044314)	59.14	0.0201
DNA recombinase assembly (GO:0000730)	59.14	0.0201
negative regulation of fat cell proliferation (GO:0070345)	59.14	0.0201
positive regulation of DNA ligation (GO:0051106)	59.14	0.0201
putrescine biosynthetic process (GO:0009446)	59.14	0.0201
histone H3-K9 trimethylation (GO:0036124)	59.14	0.0201
replication fork arrest (GO:0043111)	59.14	0.0201
chorionic trophoblast cell differentiation (GO:0060718)	59.14	0.0201
vesicle-mediated transport (GO:0016192)	0.15	0.0202
protein localization to chromosome (GO:0034502)	9.24	0.0209
positive regulation of chromosome organization (GO:2001252)	5.16	0.0213
chromosome organization involved in meiotic cell cycle (GO:0070192)	9.1	0.0215
cellular response to radiation (GO:0071478)	5.13	0.0216
positive regulation of interferon-gamma production (GO:0032729)	8.96	0.0221
protein autoubiquitination (GO:0051865)	8.96	0.0221
regulation of chromosome separation (GO:1905818)	8.96	0.0221
DNA methylation or demethylation (GO:0044728)	8.83	0.0227
cellular response to amino acid stimulus (GO:0071230)	8.7	0.0233
chromatin organization involved in regulation of transcription (GO:0034401)	8.7	0.0233
regulation of T cell mediated immunity (GO:0002709)	8.7	0.0233
selenium compound metabolic process (GO:0001887)	49.29	0.0234
DNA methylation on cytosine (GO:0032776)	49.29	0.0234
positive regulation of DNA topoisomerase (ATP-hydrolyzing) activity (GO:2000373)	49.29	0.0234
regulation of DNA topoisomerase (ATP-hydrolyzing) activity (GO:2000371)	49.29	0.0234
regulation of CD40 signaling pathway (GO:2000348)	49.29	0.0234
embryonic cleavage (GO:0040016)	49.29	0.0234
cell dedifferentiation (GO:0043697)	49.29	0.0234
dedifferentiation (GO:0043696)	49.29	0.0234
regulation of DNA ligation (GO:0051105)	49.29	0.0234
histone H3-K27 trimethylation (GO:0098532)	49.29	0.0234
protein K29-linked ubiquitination (GO:0035519)	49.29	0.0234
histone H4-K20 trimethylation (GO:0034773)	49.29	0.0234
cellular response to ionizing radiation (GO:0071479)	8.57	0.024
regulation of mRNA metabolic process (GO:1903311)	3.64	0.0251
regulation of mitotic sister chromatid segregation (GO:0033047)	8.21	0.0259
negative regulation of cellular metabolic process (GO:0031324)	1.77	0.026
signal transduction involved in DNA damage checkpoint (GO:0072422)	8.1	0.0265
signal transduction involved in DNA integrity checkpoint (GO:0072401)	8.1	0.0265
response to DNA damage checkpoint signaling (GO:0072423)	42.25	0.0267
response to DNA integrity checkpoint signaling (GO:0072402)	42.25	0.0267
tetrahydrobiopterin metabolic process (GO:0046146)	42.25	0.0267
positive regulation of megakaryocyte differentiation (GO:0045654)	42.25	0.0267
negative regulation of macrophage differentiation (GO:0045650)	42.25	0.0267
response to cell cycle checkpoint signaling (GO:0072396)	42.25	0.0267
floor plate development (GO:0033504)	42.25	0.0267
tetrahydrobiopterin biosynthetic process (GO:0006729)	42.25	0.0267
negative regulation of DNA endoreduplication (GO:0032876)	42.25	0.0267
cellular response to interleukin-18 (GO:0071351)	42.25	0.0267
double-strand break repair via synthesis-dependent strand annealing (GO:0045003)	42.25	0.0267
negative regulation of cytokinesis (GO:0032466)	42.25	0.0267
positive regulation of mitotic cell cycle spindle assembly checkpoint (GO:0090267)	42.25	0.0267
positive regulation of spindle checkpoint (GO:0090232)	42.25	0.0267
mRNA 5'-splice site recognition (GO:0000395)	42.25	0.0267
putrescine metabolic process (GO:0009445)	42.25	0.0267
interleukin-18-mediated signaling pathway (GO:0035655)	42.25	0.0267
regulation of phenotypic switching (GO:1900239)	42.25	0.0267
ribosomal small subunit export from nucleus (GO:0000056)	42.25	0.0267
tetrahydrofolate biosynthetic process (GO:0046654)	42.25	0.0267
chorion development (GO:0060717)	42.25	0.0267
commitment of neuronal cell to specific neuron type in forebrain (GO:0021902)	42.25	0.0267
negative regulation of smooth muscle cell apoptotic process (GO:0034392)	42.25	0.0267
negative regulation of nucleobase-containing compound metabolic process (GO:0045934)	2.1	0.027
signal transduction involved in cell cycle checkpoint (GO:0072395)	7.99	0.0272
negative regulation of biological process (GO:0048519)	1.47	0.0274
regulation of microtubule cytoskeleton organization (GO:0070507)	4.67	0.0275
positive regulation of catalytic activity (GO:0043085)	2.08	0.0278
reproductive process (GO:0022414)	2.07	0.0284
reproduction (GO:0000003)	2.07	0.0286
regulation of ATPase activity (GO:0043462)	7.68	0.0292
chromatin organization (GO:0006325)	2.58	0.0296
positive regulation of cell communication (GO:0010647)	0.17	0.0297
positive regulation of signaling (GO:0023056)	0.16	0.0299
regulation of meiotic cell cycle phase transition (GO:1901993)	36.96	0.0299
T-helper 1 cell differentiation (GO:0045063)	36.96	0.0299
depyrimidination (GO:0045008)	36.96	0.0299
changes to DNA methylation involved in embryo development (GO:1901538)	36.96	0.0299
negative regulation of vascular smooth muscle cell differentiation (GO:1905064)	36.96	0.0299
DNA methylation involved in embryo development (GO:0043045)	36.96	0.0299
protein K6-linked ubiquitination (GO:0085020)	36.96	0.0299
regulation of response to stress (GO:0080134)	2.03	0.0305
regulation of cellular response to heat (GO:1900034)	7.49	0.0306
negative regulation of mRNA metabolic process (GO:1903312)	7.3	0.032
positive regulation of cell cycle checkpoint (GO:1901978)	32.86	0.0332
nucleolus organization (GO:0007000)	32.86	0.0332
replication fork protection (GO:0048478)	32.86	0.0332
regulation of vascular associated smooth muscle cell apoptotic process (GO:1905459)	32.86	0.0332
positive regulation of helicase activity (GO:0051096)	32.86	0.0332
ribosomal large subunit export from nucleus (GO:0000055)	32.86	0.0332
positive regulation of isomerase activity (GO:0010912)	32.86	0.0332
regulation of isomerase activity (GO:0010911)	32.86	0.0332
extraembryonic membrane development (GO:1903867)	32.86	0.0332
histone H4-K20 methylation (GO:0034770)	32.86	0.0332
semicircular canal development (GO:0060872)	32.86	0.0332
positive regulation of blood vessel endothelial cell proliferation involved in sprouting angiogenesis (GO:1903589)	32.86	0.0332
regulation of gene silencing by miRNA (GO:0060964)	6.88	0.0356
positive regulation of biological process (GO:0048518)	1.41	0.0356
negative regulation of metabolic process (GO:0009892)	1.66	0.0359
embryonic placenta development (GO:0001892)	6.8	0.0363
ornithine metabolic process (GO:0006591)	29.57	0.0365
base-excision repair, AP site formation (GO:0006285)	29.57	0.0365
positive regulation of methylation-dependent chromatin silencing (GO:0090309)	29.57	0.0365
regulation of removal of superoxide radicals (GO:2000121)	29.57	0.0365
response to interleukin-18 (GO:0070673)	29.57	0.0365
regulation of fat cell proliferation (GO:0070344)	29.57	0.0365
folic acid-containing compound biosynthetic process (GO:0009396)	29.57	0.0365
positive regulation of sister chromatid cohesion (GO:0045876)	29.57	0.0365
regulation of posttranscriptional gene silencing (GO:0060147)	6.72	0.0371
regulation of cytokinesis (GO:0032465)	6.72	0.0371
regulation of gene silencing by RNA (GO:0060966)	6.72	0.0371
negative regulation of G2/M transition of mitotic cell cycle (GO:0010972)	6.65	0.0378
lymphocyte activation (GO:0046649)	3.18	0.0381
positive regulation of metabolic process (GO:0009893)	1.57	0.0383
protein-containing complex assembly (GO:0065003)	1.91	0.0393
telomere maintenance via telomere trimming (GO:0090737)	26.88	0.0397
t-circle formation (GO:0090656)	26.88	0.0397
histone H3-K27 methylation (GO:0070734)	26.88	0.0397
formation of extrachromosomal circular DNA (GO:0001325)	26.88	0.0397
regulation of coenzyme metabolic process (GO:0051196)	26.88	0.0397
susceptibility to natural killer cell mediated cytotoxicity (GO:0042271)	26.88	0.0397
trophoblast giant cell differentiation (GO:0060707)	26.88	0.0397
positive regulation of immune response to tumor cell (GO:0002839)	26.88	0.0397
positive regulation of response to tumor cell (GO:0002836)	26.88	0.0397
forebrain neuron fate commitment (GO:0021877)	26.88	0.0397
regulation of microtubule-based process (GO:0032886)	4.01	0.04
mitochondrial transmembrane transport (GO:1990542)	6.43	0.0401
negative regulation of response to stimulus (GO:0048585)	0.19	0.0425
positive regulation of signal transduction (GO:0009967)	0.18	0.0428
signal transduction involved in G2 DNA damage checkpoint (GO:0072425)	24.64	0.0429
positive regulation of phagocytosis, engulfment (GO:0060100)	24.64	0.0429
tRNA 5'-leader removal (GO:0001682)	24.64	0.0429
positive regulation of DNA-dependent DNA replication (GO:2000105)	24.64	0.0429
positive regulation of membrane invagination (GO:1905155)	24.64	0.0429
response to antimetabolite (GO:0097329)	24.64	0.0429
ribonucleoprotein complex assembly (GO:0022618)	3.89	0.0432
positive regulation of adaptive immune response based on somatic recombination of immune receptors built from immunoglobulin superfamily domains (GO:0002824)	5.97	0.0457
response to ether (GO:0045472)	22.75	0.0462
polyamine biosynthetic process (GO:0006596)	22.75	0.0462
negative regulation of histone H3-K9 methylation (GO:0051573)	22.75	0.0462
hepatocyte differentiation (GO:0070365)	22.75	0.0462
UV protection (GO:0009650)	22.75	0.0462
pyrimidine deoxyribonucleotide catabolic process (GO:0009223)	22.75	0.0462
regulation of blood vessel endothelial cell proliferation involved in sprouting angiogenesis (GO:1903587)	22.75	0.0462
regulation of interferon-gamma production (GO:0032649)	5.86	0.0473
pyrimidine-containing compound metabolic process (GO:0072527)	5.86	0.0473
cellular response to oxidative stress (GO:0034599)	3.74	0.0474
inner cell mass cell proliferation (GO:0001833)	21.12	0.0494
regulation of phagocytosis, engulfment (GO:0060099)	21.12	0.0494
positive regulation of mast cell activation involved in immune response (GO:0033008)	21.12	0.0494
pyrimidine nucleotide catabolic process (GO:0006244)	21.12	0.0494
regulation of methylation-dependent chromatin silencing (GO:0090308)	21.12	0.0494
positive regulation of chromatin silencing (GO:0031937)	21.12	0.0494
regulation of mitotic cell cycle spindle assembly checkpoint (GO:0090266)	21.12	0.0494
regulation of spindle checkpoint (GO:0090231)	21.12	0.0494
regulation of helicase activity (GO:0051095)	21.12	0.0494
positive regulation of mast cell degranulation (GO:0043306)	21.12	0.0494
regulation of vascular smooth muscle cell differentiation (GO:1905063)	21.12	0.0494
regulation of mitotic spindle checkpoint (GO:1903504)	21.12	0.0494
GABAergic neuron differentiation (GO:0097154)	21.12	0.0494
regulation of immune response to tumor cell (GO:0002837)	21.12	0.0494
regulation of response to tumor cell (GO:0002834)	21.12	0.0494
positive regulation of molecular function (GO:0044093)	1.84	0.0495
positive regulation of adaptive immune response (GO:0002821)	5.69	0.0498
ribonucleoprotein complex subunit organization (GO:0071826)	3.67	0.0499

## Sheet: Down-regulation_2Gy_24h_vs_EMTA
GO biological process complete	upload_1 (fold Enrichment)	upload_1 (raw P-value)
cell cycle (GO:0007049)	7.76	2.96e-84
mitotic cell cycle (GO:0000278)	11.12	2.06e-73
cell cycle process (GO:0022402)	8.63	1.19e-70
mitotic cell cycle process (GO:1903047)	11.96	9.76e-70
chromosome organization (GO:0051276)	7.43	3.9e-59
DNA metabolic process (GO:0006259)	8.14	2.18e-48
DNA replication (GO:0006260)	18.74	4.28e-48
nucleic acid metabolic process (GO:0090304)	3.99	7.13e-43
nucleobase-containing compound metabolic process (GO:0006139)	3.52	1.94e-41
heterocycle metabolic process (GO:0046483)	3.34	2.57e-39
cell cycle phase transition (GO:0044770)	13.79	7.92e-39
cellular aromatic compound metabolic process (GO:0006725)	3.29	1.14e-38
cell division (GO:0051301)	9.24	2.19e-38
mitotic cell cycle phase transition (GO:0044772)	13.65	4.41e-37
cellular response to DNA damage stimulus (GO:0006974)	6.76	3.87e-36
DNA-dependent DNA replication (GO:0006261)	22.99	9.66e-36
organic cyclic compound metabolic process (GO:1901360)	3.06	2.47e-35
cellular nitrogen compound metabolic process (GO:0034641)	2.95	8.72e-35
organelle organization (GO:0006996)	2.96	2.72e-34
DNA conformation change (GO:0071103)	12.32	4.65e-33
regulation of cell cycle (GO:0051726)	4.92	5.04e-32
DNA repair (GO:0006281)	8.15	5.55e-32
cell cycle G1/S phase transition (GO:0044843)	20.5	1.39e-30
nuclear division (GO:0000280)	11.52	1.59e-30
chromosome segregation (GO:0007059)	11.76	3.78e-30
regulation of cell cycle process (GO:0010564)	6.07	5.85e-30
G1/S transition of mitotic cell cycle (GO:0000082)	20.05	2.02e-29
organelle fission (GO:0048285)	10.46	5.56e-29
cellular component organization or biogenesis (GO:0071840)	2.16	5.8e-29
regulation of mitotic cell cycle (GO:0007346)	6.45	8.81e-28
cellular component organization (GO:0016043)	2.15	2.93e-27
macromolecule metabolic process (GO:0043170)	2.02	1.68e-25
mitotic nuclear division (GO:0140014)	15.96	3.98e-25
nuclear chromosome segregation (GO:0098813)	11.4	1.9e-23
cellular response to stress (GO:0033554)	3.54	2.04e-23
cellular macromolecule metabolic process (GO:0044260)	2.15	4.21e-23
nuclear DNA replication (GO:0033260)	36.96	4.26e-23
cell cycle DNA replication (GO:0044786)	36.06	6.26e-23
nitrogen compound metabolic process (GO:0006807)	1.86	1.32e-22
cell cycle checkpoint (GO:0000075)	11.57	2.97e-22
mitotic sister chromatid segregation (GO:0000070)	17.6	5.19e-22
regulation of cell cycle phase transition (GO:1901987)	6.93	5.68e-22
sister chromatid segregation (GO:0000819)	14.46	9.78e-22
cellular process (GO:0009987)	1.34	1.75e-21
regulation of mitotic cell cycle phase transition (GO:1901990)	7.14	2.17e-21
telomere organization (GO:0032200)	17.4	4.52e-21
cellular macromolecule biosynthetic process (GO:0034645)	3.34	5.76e-21
cellular metabolic process (GO:0044237)	1.75	2.69e-20
protein-DNA complex assembly (GO:0065004)	10.88	3.21e-20
macromolecule biosynthetic process (GO:0009059)	3.23	3.41e-20
DNA replication initiation (GO:0006270)	39.28	3.7e-20
positive regulation of cell cycle (GO:0045787)	7.04	3.72e-20
telomere maintenance (GO:0000723)	17.18	3.92e-20
organic substance metabolic process (GO:0071704)	1.73	5.19e-20
primary metabolic process (GO:0044238)	1.76	6.58e-20
regulation of mitotic nuclear division (GO:0007088)	10.89	1.44e-19
protein-DNA complex subunit organization (GO:0071824)	9.44	2.63e-19
mitotic cell cycle checkpoint (GO:0007093)	12.09	3.02e-19
negative regulation of cell cycle process (GO:0010948)	7.66	3.66e-19
negative regulation of cell cycle (GO:0045786)	5.48	7.06e-19
positive regulation of cell cycle process (GO:0090068)	8.19	7.38e-19
DNA packaging (GO:0006323)	11.05	2.22e-18
regulation of nuclear division (GO:0051783)	9.67	2.43e-18
negative regulation of cell cycle phase transition (GO:1901988)	8.88	1.82e-17
double-strand break repair (GO:0006302)	10.68	2.08e-17
negative regulation of mitotic cell cycle (GO:0045930)	7.47	2.93e-17
DNA geometric change (GO:0032392)	15.73	5.13e-17
telomere maintenance via semi-conservative replication (GO:0032201)	39.81	7.02e-17
DNA integrity checkpoint (GO:0031570)	11.57	8.8e-17
metabolic process (GO:0008152)	1.61	2.32e-16
chromatin organization (GO:0006325)	4.61	2.61e-16
negative regulation of mitotic cell cycle phase transition (GO:1901991)	8.86	2.88e-16
regulation of chromosome segregation (GO:0051983)	13.82	4.62e-16
regulation of chromosome organization (GO:0033044)	6.64	5.92e-16
microtubule cytoskeleton organization involved in mitosis (GO:1902850)	14.79	8.55e-16
chromatin assembly or disassembly (GO:0006333)	10.63	2.03e-15
spindle organization (GO:0007051)	11.17	3.73e-15
regulation of organelle organization (GO:0033043)	3.29	3.86e-15
meiotic cell cycle (GO:0051321)	8.29	4.46e-15
cellular biosynthetic process (GO:0044249)	2.39	6.46e-15
regulation of DNA replication (GO:0006275)	13.01	6.77e-15
DNA duplex unwinding (GO:0032508)	14.96	2.45e-14
regulation of macromolecule metabolic process (GO:0060255)	1.75	2.7e-14
mitotic spindle organization (GO:0007052)	16.43	4.06e-14
organic substance biosynthetic process (GO:1901576)	2.29	5.35e-14
biosynthetic process (GO:0009058)	2.27	8.54e-14
chromatin assembly (GO:0031497)	10.64	1.72e-13
nucleosome organization (GO:0034728)	9.66	2e-13
nucleosome assembly (GO:0006334)	11.47	2.41e-13
regulation of nucleobase-containing compound metabolic process (GO:0019219)	1.98	2.7e-13
regulation of sister chromatid segregation (GO:0033045)	14.08	3.27e-13
chromatin remodeling (GO:0006338)	9.02	6.46e-13
regulation of metabolic process (GO:0019222)	1.65	8.25e-13
regulation of mitotic sister chromatid separation (GO:0010965)	16.97	1.12e-12
biological_process (GO:0008150)	1.15	1.33e-12
Unclassified (UNCLASSIFIED)	0.16	1.33e-12
positive regulation of DNA metabolic process (GO:0051054)	8	1.38e-12
cellular component biogenesis (GO:0044085)	2.25	1.83e-12
regulation of cellular metabolic process (GO:0031323)	1.68	2.04e-12
regulation of nitrogen compound metabolic process (GO:0051171)	1.71	2.21e-12
regulation of transcription involved in G1/S transition of mitotic cell cycle (GO:0000083)	29.04	2.37e-12
DNA damage checkpoint (GO:0000077)	9.86	2.44e-12
DNA strand elongation (GO:0022616)	38.91	2.45e-12
regulation of chromosome separation (GO:1905818)	15.68	2.83e-12
DNA replication-independent nucleosome assembly (GO:0006336)	22.18	3.25e-12
regulation of DNA-dependent DNA replication (GO:0090329)	18.13	3.52e-12
DNA replication-independent nucleosome organization (GO:0034724)	21.64	4.15e-12
anatomical structure homeostasis (GO:0060249)	5.67	4.28e-12
regulation of mitotic metaphase/anaphase transition (GO:0030071)	17.47	5.28e-12
regulation of DNA metabolic process (GO:0051052)	5.57	6.19e-12
regulation of cell cycle G2/M phase transition (GO:1902749)	7.29	7.08e-12
DNA recombination (GO:0006310)	7.25	7.68e-12
regulation of metaphase/anaphase transition of cell cycle (GO:1902099)	16.86	7.8e-12
regulation of mitotic sister chromatid segregation (GO:0033047)	14.38	7.94e-12
cellular protein-containing complex assembly (GO:0034622)	3.57	8.09e-12
DNA strand elongation involved in DNA replication (GO:0006271)	47.53	8.21e-12
mitotic DNA integrity checkpoint (GO:0044774)	11.05	8.74e-12
ATP-dependent chromatin remodeling (GO:0043044)	14.18	9.35e-12
chromatin remodeling at centromere (GO:0031055)	24.64	1.02e-11
regulation of primary metabolic process (GO:0080090)	1.67	1.36e-11
microtubule cytoskeleton organization (GO:0000226)	4.69	1.84e-11
centromere complex assembly (GO:0034508)	21.98	2.88e-11
nucleobase-containing compound biosynthetic process (GO:0034654)	3.06	4.91e-11
meiotic cell cycle process (GO:1903046)	8.07	5.1e-11
nucleic acid phosphodiester bond hydrolysis (GO:0090305)	5.78	5.38e-11
cellular component assembly (GO:0022607)	2.21	6.38e-11
regulation of G2/M transition of mitotic cell cycle (GO:0010389)	7.17	9.51e-11
heterocycle biosynthetic process (GO:0018130)	2.94	1.03e-10
CENP-A containing nucleosome assembly (GO:0034080)	23.85	1.19e-10
CENP-A containing chromatin organization (GO:0061641)	23.85	1.19e-10
aromatic compound biosynthetic process (GO:0019438)	2.92	1.31e-10
positive regulation of mitotic cell cycle (GO:0045931)	8.16	1.5e-10
protein-containing complex assembly (GO:0065003)	2.58	1.95e-10
regulation of signal transduction by p53 class mediator (GO:1901796)	7.31	2.22e-10
positive regulation of cell cycle phase transition (GO:1901989)	10.78	2.41e-10
cell population proliferation (GO:0008283)	3.68	3.03e-10
mitotic DNA damage checkpoint (GO:0044773)	10.56	3.08e-10
response to stress (GO:0006950)	1.91	6.09e-10
DNA synthesis involved in DNA repair (GO:0000731)	15.64	6.56e-10
metaphase plate congression (GO:0051310)	15.34	7.83e-10
meiotic nuclear division (GO:0140013)	7.83	9.1e-10
establishment of chromosome localization (GO:0051303)	12.5	1.06e-09
double-strand break repair via homologous recombination (GO:0000724)	10.68	1.19e-09
chromosome localization (GO:0050000)	12.32	1.22e-09
protein-containing complex subunit organization (GO:0043933)	2.35	1.32e-09
recombinational repair (GO:0000725)	10.56	1.34e-09
regulation of cellular component organization (GO:0051128)	2.12	1.38e-09
DNA biosynthetic process (GO:0071897)	9.24	1.5e-09
G2/M transition of mitotic cell cycle (GO:0000086)	8.21	1.7e-09
negative regulation of cellular macromolecule biosynthetic process (GO:2000113)	2.61	1.85e-09
cell cycle G2/M phase transition (GO:0044839)	8.09	2.04e-09
negative regulation of macromolecule biosynthetic process (GO:0010558)	2.56	2.33e-09
microtubule-based process (GO:0007017)	3.55	2.42e-09
biological regulation (GO:0065007)	1.29	2.73e-09
regulation of RNA metabolic process (GO:0051252)	1.81	2.86e-09
positive regulation of mitotic cell cycle phase transition (GO:1901992)	11.23	3.13e-09
RNA metabolic process (GO:0016070)	2.4	3.42e-09
histone exchange (GO:0043486)	15.73	3.8e-09
reproductive process (GO:0022414)	2.54	3.96e-09
organic cyclic compound biosynthetic process (GO:1901362)	2.61	4.04e-09
reproduction (GO:0000003)	2.53	4.1e-09
regulation of macromolecule biosynthetic process (GO:0010556)	1.78	4.17e-09
negative regulation of cellular biosynthetic process (GO:0031327)	2.47	4.95e-09
negative regulation of sister chromatid segregation (GO:0033046)	18.48	6.89e-09
negative regulation of biosynthetic process (GO:0009890)	2.43	7.79e-09
positive regulation of DNA biosynthetic process (GO:2000573)	11.96	7.98e-09
mitotic cytokinesis (GO:0000281)	11.96	7.98e-09
negative regulation of chromosome segregation (GO:0051985)	17.98	8.46e-09
nucleotide-excision repair, DNA incision, 5'-to lesion (GO:0006296)	17.98	8.46e-09
positive regulation of cellular process (GO:0048522)	1.62	9.4e-09
DNA replication checkpoint (GO:0000076)	32.34	1.43e-08
meiosis I cell cycle process (GO:0061982)	8.51	1.44e-08
regulation of cellular process (GO:0050794)	1.32	1.47e-08
nucleotide-excision repair, DNA incision (GO:0033683)	16.63	1.52e-08
signal transduction involved in DNA damage checkpoint (GO:0072422)	11.14	1.55e-08
signal transduction involved in DNA integrity checkpoint (GO:0072401)	11.14	1.55e-08
negative regulation of chromosome organization (GO:2001251)	7.55	1.59e-08
regulation of cellular biosynthetic process (GO:0031326)	1.72	1.67e-08
signal transduction involved in cell cycle checkpoint (GO:0072395)	10.99	1.75e-08
regulation of cellular macromolecule biosynthetic process (GO:2000112)	1.76	1.76e-08
regulation of microtubule cytoskeleton organization (GO:0070507)	6.23	1.9e-08
negative regulation of mitotic metaphase/anaphase transition (GO:0045841)	21.12	2e-08
cytoskeleton-dependent cytokinesis (GO:0061640)	9.34	2.03e-08
regulation of biosynthetic process (GO:0009889)	1.71	2.06e-08
regulation of gene expression (GO:0010468)	1.69	2.24e-08
cytokinesis (GO:0000910)	9.15	2.51e-08
negative regulation of metaphase/anaphase transition of cell cycle (GO:1902100)	20.39	2.52e-08
regulation of cell cycle G1/S phase transition (GO:1902806)	6.6	2.59e-08
mitotic metaphase plate congression (GO:0007080)	15.47	2.64e-08
regulation of cyclin-dependent protein serine/threonine kinase activity (GO:0000079)	8.96	3.09e-08
negative regulation of mitotic nuclear division (GO:0045839)	15.12	3.14e-08
negative regulation of cellular process (GO:0048523)	1.65	3.66e-08
negative regulation of cell cycle G2/M phase transition (GO:1902750)	8.78	3.78e-08
negative regulation of mitotic sister chromatid separation (GO:2000816)	19.08	3.92e-08
negative regulation of nucleobase-containing compound metabolic process (GO:0045934)	2.42	3.97e-08
negative regulation of RNA metabolic process (GO:0051253)	2.49	4.41e-08
regulation of cyclin-dependent protein kinase activity (GO:1904029)	8.61	4.6e-08
negative regulation of chromosome separation (GO:1905819)	18.48	4.84e-08
regulation of gene expression, epigenetic (GO:0040029)	5.39	4.85e-08
regulation of G1/S transition of mitotic cell cycle (GO:2000045)	6.85	4.92e-08
spindle assembly (GO:0051225)	9.8	5.11e-08
negative regulation of G1/S transition of mitotic cell cycle (GO:2000134)	8.45	5.58e-08
signal transduction in response to DNA damage (GO:0042770)	8.45	5.58e-08
positive regulation of biological process (GO:0048518)	1.53	5.7e-08
DNA unwinding involved in DNA replication (GO:0006268)	40.33	5.86e-08
mitotic G1/S transition checkpoint (GO:0044819)	11.2	6.72e-08
mitotic G1 DNA damage checkpoint (GO:0031571)	11.2	6.72e-08
positive regulation of macromolecule metabolic process (GO:0010604)	1.82	6.92e-08
regulation of biological process (GO:0050789)	1.29	7.03e-08
negative regulation of mitotic sister chromatid segregation (GO:0033048)	17.4	7.26e-08
mitotic spindle assembly (GO:0090307)	17.4	7.26e-08
negative regulation of cell cycle G1/S phase transition (GO:1902807)	8.21	7.41e-08
G1 DNA damage checkpoint (GO:0044783)	11.03	7.64e-08
meiosis I (GO:0007127)	8.07	8.92e-08
regulation of response to DNA damage stimulus (GO:2001020)	5.5	9.41e-08
nucleotide-excision repair, DNA gap filling (GO:0006297)	22.5	1.1e-07
interstrand cross-link repair (GO:0036297)	12.8	1.12e-07
negative regulation of nuclear division (GO:0051784)	12.55	1.29e-07
postreplication repair (GO:0006301)	12.55	1.29e-07
regulation of microtubule-based process (GO:0032886)	5.35	1.34e-07
DNA damage response, detection of DNA damage (GO:0042769)	15.17	1.83e-07
cellular nitrogen compound biosynthetic process (GO:0044271)	2.22	1.87e-07
regulation of DNA repair (GO:0006282)	7.27	2.51e-07
translesion synthesis (GO:0019985)	14.43	2.56e-07
DNA damage response, signal transduction by p53 class mediator (GO:0030330)	9.13	3.8e-07
negative regulation of organelle organization (GO:0010639)	3.95	3.86e-07
mitotic G2/M transition checkpoint (GO:0044818)	17.85	4.2e-07
histone phosphorylation (GO:0016572)	17.85	4.2e-07
positive regulation of metabolic process (GO:0009893)	1.72	4.38e-07
mitotic spindle elongation (GO:0000022)	46.21	4.82e-07
G2 DNA damage checkpoint (GO:0031572)	17.25	5.12e-07
protein localization to chromosome (GO:0034502)	10.4	5.44e-07
regulation of double-strand break repair via homologous recombination (GO:0010569)	12.86	5.57e-07
nucleotide-excision repair (GO:0006289)	7.53	5.81e-07
regulation of DNA biosynthetic process (GO:2000278)	7.46	6.32e-07
spindle elongation (GO:0051231)	41.07	7.42e-07
negative regulation of cellular metabolic process (GO:0031324)	1.89	8.02e-07
negative regulation of G2/M transition of mitotic cell cycle (GO:0010972)	8.31	8.38e-07
regulation of cell cycle checkpoint (GO:1901976)	15.68	8.96e-07
error-prone translesion synthesis (GO:0042276)	22.18	9.86e-07
negative regulation of biological process (GO:0048519)	1.53	1.16e-06
negative regulation of macromolecule metabolic process (GO:0010605)	1.85	1.2e-06
positive regulation of chromosome organization (GO:2001252)	5.59	1.3e-06
negative regulation of gene expression (GO:0010629)	2.11	1.55e-06
DNA topological change (GO:0006265)	33.6	1.58e-06
positive regulation of nucleobase-containing compound metabolic process (GO:0045935)	2.03	1.67e-06
positive regulation of organelle organization (GO:0010638)	2.99	2e-06
regulation of double-strand break repair (GO:2000779)	8.75	2.01e-06
negative regulation of nitrogen compound metabolic process (GO:0051172)	1.89	2.21e-06
cellular response to stimulus (GO:0051716)	1.43	2.31e-06
double-strand break repair via nonhomologous end joining (GO:0006303)	10.38	2.38e-06
negative regulation of DNA replication (GO:0008156)	13.27	2.4e-06
negative regulation of nucleic acid-templated transcription (GO:1903507)	2.31	2.58e-06
negative regulation of RNA biosynthetic process (GO:1902679)	2.3	2.65e-06
DNA damage response, signal transduction by p53 class mediator resulting in cell cycle arrest (GO:0006977)	10.2	2.68e-06
negative regulation of DNA-dependent DNA replication (GO:2000104)	17.74	2.98e-06
signal transduction involved in mitotic G1 DNA damage checkpoint (GO:0072431)	10.02	3.01e-06
signal transduction involved in mitotic cell cycle checkpoint (GO:0072413)	10.02	3.01e-06
signal transduction involved in mitotic DNA integrity checkpoint (GO:1902403)	10.02	3.01e-06
signal transduction involved in mitotic DNA damage checkpoint (GO:1902402)	10.02	3.01e-06
intracellular signal transduction involved in G1 DNA damage checkpoint (GO:1902400)	10.02	3.01e-06
regulation of centrosome cycle (GO:0046605)	10.02	3.01e-06
DNA-dependent DNA replication maintenance of fidelity (GO:0045005)	12.62	3.23e-06
chromosome condensation (GO:0030261)	12.62	3.23e-06
mitotic spindle assembly checkpoint (GO:0007094)	17.06	3.63e-06
mitotic spindle checkpoint (GO:0071174)	17.06	3.63e-06
spindle assembly checkpoint (GO:0071173)	17.06	3.63e-06
spindle checkpoint (GO:0031577)	17.06	3.63e-06
response to radiation (GO:0009314)	3.38	3.91e-06
positive regulation of cell cycle arrest (GO:0071158)	7.92	4.27e-06
non-recombinational repair (GO:0000726)	9.39	4.69e-06
RNA biosynthetic process (GO:0032774)	2.83	4.83e-06
positive regulation of G2/M transition of mitotic cell cycle (GO:0010971)	15.84	5.26e-06
negative regulation of transcription, DNA-templated (GO:0045892)	2.28	5.93e-06
regulation of binding (GO:0051098)	3.56	6.06e-06
gene expression (GO:0010467)	1.92	6.17e-06
positive regulation of chromosome segregation (GO:0051984)	15.3	6.28e-06
regulation of cellular response to stress (GO:0080135)	2.71	6.51e-06
negative regulation of metabolic process (GO:0009892)	1.74	7.32e-06
female meiotic nuclear division (GO:0007143)	14.79	7.46e-06
regulation of nucleic acid-templated transcription (GO:1903506)	1.63	7.66e-06
chromatin organization involved in regulation of transcription (GO:0034401)	8.7	7.84e-06
regulation of RNA biosynthetic process (GO:2001141)	1.63	7.9e-06
positive regulation of cell cycle G2/M phase transition (GO:1902751)	14.31	8.8e-06
mitotic chromosome condensation (GO:0007076)	21.74	8.94e-06
positive regulation of macromolecule biosynthetic process (GO:0010557)	1.94	9.21e-06
mitotic spindle midzone assembly (GO:0051256)	42.25	9.52e-06
positive regulation of DNA-directed DNA polymerase activity (GO:1900264)	42.25	9.52e-06
regulation of DNA-directed DNA polymerase activity (GO:1900262)	42.25	9.52e-06
mitotic DNA replication (GO:1902969)	42.25	9.52e-06
signal transduction by p53 class mediator (GO:0072331)	6.11	1.07e-05
organelle localization (GO:0051640)	2.85	1.09e-05
mRNA processing (GO:0006397)	3.14	1.09e-05
protein localization to chromosome, centromeric region (GO:0071459)	20.54	1.13e-05
positive regulation of nitrogen compound metabolic process (GO:0051173)	1.68	1.13e-05
reciprocal meiotic recombination (GO:0007131)	10.15	1.18e-05
mRNA cis splicing, via spliceosome (GO:0045292)	13.44	1.21e-05
homologous recombination (GO:0035825)	9.95	1.32e-05
regulation of transferase activity (GO:0051338)	2.36	1.36e-05
error-free translesion synthesis (GO:0070987)	19.46	1.41e-05
establishment of organelle localization (GO:0051656)	3.33	1.45e-05
regulation of DNA binding (GO:0051101)	5.87	1.48e-05
regulation of gene silencing (GO:0060968)	5.87	1.48e-05
regulation of mRNA metabolic process (GO:1903311)	3.64	1.54e-05
mismatch repair (GO:0006298)	12.67	1.63e-05
attachment of spindle microtubules to kinetochore (GO:0008608)	18.48	1.74e-05
regulation of DNA recombination (GO:0000018)	6.46	1.96e-05
regulation of DNA endoreduplication (GO:0032875)	32.86	2.02e-05
positive regulation of mitotic nuclear division (GO:0045840)	9.24	2.05e-05
regulation of catalytic activity (GO:0050790)	1.79	2.28e-05
positive regulation of DNA replication (GO:0045740)	11.67	2.47e-05
negative regulation of gene expression, epigenetic (GO:0045814)	7.3	2.53e-05
positive regulation of cellular component organization (GO:0051130)	2.17	2.63e-05
anaphase-promoting complex-dependent catabolic process (GO:0031145)	7.21	2.74e-05
regulation of RNA splicing (GO:0043484)	5.44	2.75e-05
DNA replication-dependent nucleosome assembly (GO:0006335)	29.57	2.8e-05
spindle midzone assembly (GO:0051255)	29.57	2.8e-05
DNA replication-dependent nucleosome organization (GO:0034723)	29.57	2.8e-05
protein localization to cytoskeleton (GO:0044380)	11.37	2.82e-05
negative regulation of G0 to G1 transition (GO:0070317)	11.37	2.82e-05
regulation of transcription, DNA-templated (GO:0006355)	1.59	2.93e-05
mRNA export from nucleus (GO:0006406)	6.1	2.97e-05
mRNA-containing ribonucleoprotein complex export from nucleus (GO:0071427)	6.1	2.97e-05
chromatin silencing (GO:0006342)	8.63	3.07e-05
chromatin organization involved in negative regulation of transcription (GO:0097549)	8.63	3.07e-05
G protein-coupled receptor signaling pathway (GO:0007186)	0.17	3.08e-05
centrosome cycle (GO:0007098)	7.04	3.22e-05
cytoskeleton organization (GO:0007010)	2.22	3.29e-05
regulation of cell cycle arrest (GO:0071156)	5.99	3.4e-05
response to UV (GO:0009411)	5.24	3.67e-05
positive regulation of gene expression, epigenetic (GO:0045815)	8.35	3.73e-05
regulation of cytokinesis (GO:0032465)	6.72	4.38e-05
regulation of protein localization to nucleus (GO:1900180)	5.79	4.4e-05
DNA replication preinitiation complex assembly (GO:0071163)	73.93	4.57e-05
regulation of G0 to G1 transition (GO:0070316)	10.32	4.63e-05
positive regulation of cellular metabolic process (GO:0031325)	1.61	4.96e-05
response to ionizing radiation (GO:0010212)	5.03	5.11e-05
positive regulation of DNA repair (GO:0045739)	7.72	5.87e-05
positive regulation of biosynthetic process (GO:0009891)	1.82	6.07e-05
positive regulation of nuclear division (GO:0051785)	7.61	6.41e-05
protein localization to kinetochore (GO:0034501)	22.75	6.45e-05
mRNA splicing, via spliceosome (GO:0000398)	3.56	6.62e-05
RNA splicing, via transesterification reactions with bulged adenosine as nucleophile (GO:0000377)	3.56	6.62e-05
microtubule organizing center organization (GO:0031023)	6.29	6.76e-05
RNA localization (GO:0006403)	4.05	6.84e-05
regulation of molecular function (GO:0065009)	1.59	7.06e-05
RNA splicing, via transesterification reactions (GO:0000375)	3.52	7.35e-05
cellular localization (GO:0051641)	1.72	7.37e-05
mRNA metabolic process (GO:0016071)	2.5	7.63e-05
positive regulation of protein localization to kinetochore (GO:1905342)	55.45	7.91e-05
regulation of protein localization to kinetochore (GO:1905340)	55.45	7.91e-05
DNA replication, removal of RNA primer (GO:0043137)	55.45	7.91e-05
inner cell mass cell proliferation (GO:0001833)	21.12	8.2e-05
positive regulation of cellular biosynthetic process (GO:0031328)	1.81	8.32e-05
transcription, DNA-templated (GO:0006351)	2.54	8.74e-05
nucleic acid-templated transcription (GO:0097659)	2.54	8.93e-05
regulation of mRNA splicing, via spliceosome (GO:0048024)	5.97	9.49e-05
ribonucleoprotein complex export from nucleus (GO:0071426)	5.2	9.56e-05
transcription-coupled nucleotide-excision repair (GO:0006283)	7.09	9.69e-05
nuclear export (GO:0051168)	4.62	9.96e-05
ribonucleoprotein complex localization (GO:0071166)	5.16	0.000101
system process (GO:0003008)	0.34	0.000109
chromosome separation (GO:0051304)	11.92	0.00011
RNA export from nucleus (GO:0006405)	5.08	0.000113
DNA replication, synthesis of RNA primer (GO:0006269)	44.36	0.000125
actomyosin contractile ring assembly (GO:0000915)	44.36	0.000125
assembly of actomyosin apparatus involved in cytokinesis (GO:0000912)	44.36	0.000125
double-strand break repair via break-induced replication (GO:0000727)	44.36	0.000125
lipid metabolic process (GO:0006629)	0.19	0.00013
positive regulation of protein localization to nucleus (GO:1900182)	6.72	0.000132
regulation of cell division (GO:0051302)	4.45	0.000133
protein localization to microtubule cytoskeleton (GO:0072698)	11.2	0.000143
response to stimulus (GO:0050896)	1.28	0.000147
regulation of mRNA processing (GO:0050684)	4.86	0.000155
negative regulation of cell division (GO:0051782)	17.4	0.000155
deoxyribonucleotide biosynthetic process (GO:0009263)	17.4	0.000155
regulation of ATP metabolic process (GO:1903578)	5.43	0.000177
maintenance of DNA methylation (GO:0010216)	36.96	0.000186
actomyosin contractile ring organization (GO:0044837)	36.96	0.000186
regulation of cytoskeleton organization (GO:0051493)	2.62	0.000187
regulation of DNA damage checkpoint (GO:2000001)	16.43	0.000188
kinetochore organization (GO:0051383)	16.43	0.000188
positive regulation of telomerase activity (GO:0051973)	10.27	0.000207
cytokinetic process (GO:0032506)	10.27	0.000207
blastocyst growth (GO:0001832)	15.56	0.000225
mitotic G2 DNA damage checkpoint (GO:0007095)	15.56	0.000225
tetrahydrofolate metabolic process (GO:0046653)	15.56	0.000225
transcription initiation from RNA polymerase I promoter (GO:0006361)	9.99	0.000232
deoxyribonucleotide metabolic process (GO:0009262)	9.99	0.000232
RNA processing (GO:0006396)	2.22	0.000233
negative regulation of DNA endoreduplication (GO:0032876)	31.68	0.000263
nucleocytoplasmic transport (GO:0006913)	3.48	0.000265
regulation of exit from mitosis (GO:0007096)	14.79	0.000267
negative regulation of cellular component organization (GO:0051129)	2.37	0.000289
nuclear transport (GO:0051169)	3.44	0.000293
peptidyl-serine modification (GO:0018209)	4	0.000304
protein export from nucleus (GO:0006611)	4.41	0.000308
nucleotide-excision repair, preincision complex stabilization (GO:0006293)	14.08	0.000315
transcription by RNA polymerase I (GO:0006360)	9.24	0.000323
positive regulation of catalytic activity (GO:0043085)	1.88	0.000327
female meiosis I (GO:0007144)	27.72	0.000358
regulation of meiotic cell cycle phase transition (GO:1901993)	27.72	0.000358
protein K6-linked ubiquitination (GO:0085020)	27.72	0.000358
regulation of sister chromatid cohesion (GO:0007063)	13.44	0.000368
nucleotide-excision repair, DNA incision, 3'-to lesion (GO:0006295)	13.44	0.000368
DNA double-strand break processing (GO:0000729)	13.44	0.000368
regulation of alternative mRNA splicing, via spliceosome (GO:0000381)	6.82	0.000371
secretion (GO:0046903)	0.2	0.000374
positive regulation of molecular function (GO:0044093)	1.76	0.000379
immune response (GO:0006955)	0.36	0.000385
RNA splicing (GO:0008380)	2.84	0.000395
positive regulation of DNA recombination (GO:0045911)	8.8	0.000396
mRNA transport (GO:0051028)	4.24	0.000404
base-excision repair (GO:0006284)	8.6	0.000438
regulation of spindle organization (GO:0090224)	8.6	0.000438
modification-dependent macromolecule catabolic process (GO:0043632)	2.51	0.00045
positive regulation of protein localization to Cajal body (GO:1904871)	24.64	0.000473
regulation of protein localization to Cajal body (GO:1904869)	24.64	0.000473
peptidyl-serine phosphorylation (GO:0018105)	4.13	0.00048
cellular response to leukemia inhibitory factor (GO:1990830)	5.28	0.000523
response to leukemia inhibitory factor (GO:1990823)	5.28	0.000523
cellular macromolecule catabolic process (GO:0044265)	2.09	0.00058
mitotic DNA replication checkpoint (GO:0033314)	22.18	0.000609
positive regulation of establishment of protein localization to telomere (GO:1904851)	22.18	0.000609
positive regulation of double-strand break repair via homologous recombination (GO:1905168)	22.18	0.000609
regulation of mitotic centrosome separation (GO:0046602)	22.18	0.000609
positive regulation of response to DNA damage stimulus (GO:2001022)	5.12	0.00062
RNA 3'-end processing (GO:0031123)	4.41	0.000655
negative regulation of transcription by RNA polymerase II (GO:0000122)	2.12	0.000663
transmembrane transport (GO:0055085)	0.29	0.000666
symbiont process (GO:0044403)	2.21	0.000671
regulation of meiotic cell cycle (GO:0051445)	7.7	0.000695
positive regulation of cell population proliferation (GO:0008284)	2.06	0.000719
one-carbon metabolic process (GO:0006730)	10.95	0.000736
establishment of mitotic spindle localization (GO:0040001)	10.95	0.000736
sister chromatid cohesion (GO:0007062)	7.54	0.000757
telomere maintenance via telomere trimming (GO:0090737)	20.16	0.000768
t-circle formation (GO:0090656)	20.16	0.000768
formation of extrachromosomal circular DNA (GO:0001325)	20.16	0.000768
attachment of mitotic spindle microtubules to kinetochore (GO:0051315)	20.16	0.000768
regulation of establishment of protein localization to telomere (GO:0070203)	20.16	0.000768
cellular response to radiation (GO:0071478)	3.85	0.000784
regulation of telomerase activity (GO:0051972)	7.39	0.000824
positive regulation of telomere maintenance (GO:0032206)	7.39	0.000824
folic acid-containing compound metabolic process (GO:0006760)	10.56	0.000832
cellular response to drug (GO:0035690)	2.85	0.000907
animal organ regeneration (GO:0031100)	5.69	0.000912
nucleotide-excision repair, preincision complex assembly (GO:0006294)	10.2	0.000937
nucleobase-containing small molecule interconversion (GO:0015949)	10.2	0.000937
signal transduction involved in G2 DNA damage checkpoint (GO:0072425)	18.48	0.00095
positive regulation of DNA-dependent DNA replication (GO:2000105)	18.48	0.00095
regulation of establishment of protein localization to chromosome (GO:0070202)	18.48	0.00095
chromatin silencing at rDNA (GO:0000183)	18.48	0.00095
negative regulation of meiotic nuclear division (GO:0045835)	18.48	0.00095
regulation of cellular response to heat (GO:1900034)	5.61	0.00097
positive regulation of gene expression (GO:0010628)	1.66	0.000988
regulation of cellular localization (GO:0060341)	2.05	0.000989
regulation of nucleocytoplasmic transport (GO:0046822)	4.7	0.000996
proteasomal protein catabolic process (GO:0010498)	2.82	0.00101
response to drug (GO:0042493)	1.98	0.00103
interspecies interaction between organisms (GO:0044419)	2.09	0.00104
spindle assembly involved in female meiosis I (GO:0007057)	73.93	0.00105
transcription elongation from RNA polymerase I promoter (GO:0006362)	9.86	0.00105
telomere maintenance via telomere lengthening (GO:0010833)	9.86	0.00105
negative regulation of mRNA metabolic process (GO:1903312)	5.48	0.0011
positive regulation of binding (GO:0051099)	3.66	0.0011
regulation of megakaryocyte differentiation (GO:0045652)	6.85	0.00114
positive regulation of protein localization to chromosome, telomeric region (GO:1904816)	17.06	0.00116
regulation of telomere maintenance (GO:0032204)	5.41	0.00116
somatic diversification of immune receptors via germline recombination within a single locus (GO:0002562)	9.54	0.00117
positive regulation of double-strand break repair (GO:2000781)	9.54	0.00117
termination of RNA polymerase I transcription (GO:0006363)	9.54	0.00117
replication fork processing (GO:0031297)	9.54	0.00117
somatic cell DNA recombination (GO:0016444)	9.54	0.00117
regulation of phosphate metabolic process (GO:0019220)	1.69	0.0012
retrograde vesicle-mediated transport, Golgi to endoplasmic reticulum (GO:0006890)	5.28	0.00131
regulation of chromatin organization (GO:1902275)	3.56	0.00132
nervous system process (GO:0050877)	0.32	0.00136
regulation of mitotic cell cycle spindle assembly checkpoint (GO:0090266)	15.84	0.00139
regulation of spindle checkpoint (GO:0090231)	15.84	0.00139
regulation of helicase activity (GO:0051095)	15.84	0.00139
meiotic spindle organization (GO:0000212)	15.84	0.00139
regulation of mitotic spindle checkpoint (GO:1903504)	15.84	0.00139
protein localization to organelle (GO:0033365)	2.18	0.0014
gene silencing (GO:0016458)	3.89	0.00142
regulation of gene silencing by miRNA (GO:0060964)	5.16	0.00146
secretion by cell (GO:0032940)	0.22	0.00152
tRNA-containing ribonucleoprotein complex export from nucleus (GO:0071431)	8.7	0.0016
tRNA export from nucleus (GO:0006409)	8.7	0.0016
positive regulation of telomere maintenance via telomerase (GO:0032212)	8.7	0.0016
protein heterotetramerization (GO:0051290)	8.7	0.0016
pteridine-containing compound metabolic process (GO:0042558)	8.7	0.0016
liver regeneration (GO:0097421)	8.7	0.0016
transport (GO:0006810)	0.64	0.00161
regulation of posttranscriptional gene silencing (GO:0060147)	5.04	0.00164
regulation of gene silencing by RNA (GO:0060966)	5.04	0.00164
proteasome-mediated ubiquitin-dependent protein catabolic process (GO:0043161)	2.8	0.00165
positive regulation of telomerase RNA localization to Cajal body (GO:1904874)	14.79	0.00165
regulation of protein localization to chromosome, telomeric region (GO:1904814)	14.79	0.00165
regulation of phosphorus metabolic process (GO:0051174)	1.68	0.00165
cell-cell signaling (GO:0007267)	0.27	0.00166
meiotic chromosome segregation (GO:0045132)	4.98	0.00173
positive regulation of G2/MI transition of meiotic cell cycle (GO:0110032)	49.29	0.00173
regulation of G2/MI transition of meiotic cell cycle (GO:0110030)	49.29	0.00173
leading strand elongation (GO:0006272)	49.29	0.00173
cellular response to trichostatin A (GO:0035984)	49.29	0.00173
response to trichostatin A (GO:0035983)	49.29	0.00173
L-arginine import across plasma membrane (GO:0097638)	49.29	0.00173
regulation of cellular protein localization (GO:1903827)	2.37	0.00176
positive regulation of transferase activity (GO:0051347)	2.16	0.0018
RNA transport (GO:0050658)	3.38	0.00186
nucleic acid transport (GO:0050657)	3.38	0.00186
regulation of protein metabolic process (GO:0051246)	1.51	0.00188
apoptotic process (GO:0006915)	1.96	0.00194
tRNA transport (GO:0051031)	8.21	0.00195
cellular response to nitric oxide (GO:0071732)	13.86	0.00195
apoptotic DNA fragmentation (GO:0006309)	13.86	0.00195
regulation of cellular protein metabolic process (GO:0032268)	1.52	0.00195
establishment of RNA localization (GO:0051236)	3.34	0.00198
covalent chromatin modification (GO:0016569)	2.6	0.00203
regulation of phosphorylation (GO:0042325)	1.7	0.00204
positive regulation of cellular protein localization (GO:1903829)	2.72	0.00206
cellular lipid metabolic process (GO:0044255)	0.23	0.00208
establishment of spindle localization (GO:0051293)	7.99	0.00213
nucleobase metabolic process (GO:0009112)	7.99	0.00213
positive regulation of telomere maintenance via telomere lengthening (GO:1904358)	7.99	0.00213
regulation of telomere maintenance via telomere lengthening (GO:1904356)	5.87	0.00215
viral process (GO:0016032)	2.13	0.0022
negative regulation of meiotic cell cycle (GO:0051447)	13.05	0.00227
protein sumoylation (GO:0016925)	5.78	0.00229
chromosome organization involved in meiotic cell cycle (GO:0070192)	5.69	0.00244
nucleus organization (GO:0006997)	3.98	0.00247
regulation of mitotic spindle organization (GO:0060236)	7.58	0.00255
positive regulation of cytokinesis (GO:0032467)	7.58	0.00255
ncRNA export from nucleus (GO:0097064)	7.58	0.00255
dTMP metabolic process (GO:0046073)	36.96	0.00257
spindle assembly involved in female meiosis (GO:0007056)	36.96	0.00257
dTMP biosynthetic process (GO:0006231)	36.96	0.00257
cellular response to camptothecin (GO:0072757)	36.96	0.00257
negative regulation of epidermis development (GO:0045683)	12.32	0.00262
regulation of telomerase RNA localization to Cajal body (GO:1904872)	12.32	0.00262
protein modification by small protein conjugation or removal (GO:0070647)	1.89	0.00266
negative regulation of translation (GO:0017148)	3.92	0.00268
antigen processing and presentation of exogenous peptide antigen via MHC class II (GO:0019886)	4.53	0.00273
regulation of protein modification process (GO:0031399)	1.63	0.00274
positive regulation of histone methylation (GO:0031062)	7.39	0.00277
liver development (GO:0001889)	3.89	0.00279
antigen processing and presentation of peptide antigen via MHC class II (GO:0002495)	4.48	0.00286
ubiquitin-dependent protein catabolic process (GO:0006511)	2.3	0.00289
cell adhesion (GO:0007155)	0.24	0.00292
multi-organism localization (GO:1902579)	5.44	0.00293
multi-organism transport (GO:0044766)	5.44	0.00293
biological adhesion (GO:0022610)	0.24	0.00296
response to nitric oxide (GO:0071731)	11.67	0.003
cellular response to reactive nitrogen species (GO:1902170)	11.67	0.003
modification-dependent protein catabolic process (GO:0019941)	2.27	0.00308
intrinsic apoptotic signaling pathway in response to DNA damage (GO:0008630)	5.36	0.00311
hepaticobiliary system development (GO:0061008)	3.81	0.00313
antigen processing and presentation of peptide or polysaccharide antigen via MHC class II (GO:0002504)	4.39	0.00314
somatic diversification of immune receptors (GO:0002200)	7.04	0.00326
spindle localization (GO:0051653)	7.04	0.00326
protein-containing complex localization (GO:0031503)	2.88	0.00326
protein localization to centrosome (GO:0071539)	11.09	0.00342
protein localization to microtubule organizing center (GO:1905508)	11.09	0.00342
negative regulation of nucleocytoplasmic transport (GO:0046823)	11.09	0.00342
regulation of centrosome duplication (GO:0010824)	6.88	0.00353
regulation of protein binding (GO:0043393)	3.05	0.00356
positive regulation of meiotic cell cycle phase transition (GO:1901995)	29.57	0.00357
metaphase/anaphase transition of mitotic cell cycle (GO:0007091)	29.57	0.00357
RNA localization to nucleus (GO:0090685)	29.57	0.00357
RNA localization to Cajal body (GO:0090670)	29.57	0.00357
scaRNA localization to Cajal body (GO:0090666)	29.57	0.00357
metaphase/anaphase transition of cell cycle (GO:0044784)	29.57	0.00357
lagging strand elongation (GO:0006273)	29.57	0.00357
L-lysine transport (GO:1902022)	29.57	0.00357
response to camptothecin (GO:1901563)	29.57	0.00357
nuclear polyadenylation-dependent tRNA catabolic process (GO:0071038)	29.57	0.00357
negative regulation of fat cell proliferation (GO:0070345)	29.57	0.00357
mitochondrial DNA repair (GO:0043504)	29.57	0.00357
positive regulation of DNA ligation (GO:0051106)	29.57	0.00357
replication fork arrest (GO:0043111)	29.57	0.00357
L-lysine transmembrane transport (GO:1903401)	29.57	0.00357
L-arginine transmembrane transport (GO:1903400)	29.57	0.00357
homeostatic process (GO:0042592)	1.63	0.0037
DNA-templated transcription, termination (GO:0006353)	5.06	0.0039
metal ion transport (GO:0030001)	0.12	0.00405
cell death (GO:0008219)	1.79	0.00431
positive regulation of RNA metabolic process (GO:0051254)	1.61	0.00434
nucleotide-excision repair, DNA duplex unwinding (GO:0000717)	10.08	0.00435
meiotic chromosome separation (GO:0051307)	10.08	0.00435
regulation of nuclease activity (GO:0032069)	10.08	0.00435
regulation of ubiquitin protein ligase activity (GO:1904666)	10.08	0.00435
regulation of centriole replication (GO:0046599)	10.08	0.00435
regulation of RNA stability (GO:0043487)	3.21	0.00437
histone modification (GO:0016570)	2.47	0.00437
regulation of response to stress (GO:0080134)	1.68	0.00453
negative regulation of cellular amide metabolic process (GO:0034249)	3.52	0.00471
meiotic chromosome condensation (GO:0010032)	24.64	0.00471
mitotic centrosome separation (GO:0007100)	24.64	0.00471
positive regulation of DNA topoisomerase (ATP-hydrolyzing) activity (GO:2000373)	24.64	0.00471
regulation of DNA topoisomerase (ATP-hydrolyzing) activity (GO:2000371)	24.64	0.00471
chromatin silencing at telomere (GO:0006348)	24.64	0.00471
L-arginine transport (GO:1902023)	24.64	0.00471
nuclear polyadenylation-dependent ncRNA catabolic process (GO:0071046)	24.64	0.00471
nuclear polyadenylation-dependent rRNA catabolic process (GO:0071035)	24.64	0.00471
nuclear ncRNA surveillance (GO:0071029)	24.64	0.00471
positive regulation of exit from mitosis (GO:0031536)	24.64	0.00471
regulation of DNA ligation (GO:0051105)	24.64	0.00471
histone H3-K27 trimethylation (GO:0098532)	24.64	0.00471
female meiosis chromosome segregation (GO:0016321)	24.64	0.00471
ornithine transport (GO:0015822)	24.64	0.00471
arginine transmembrane transport (GO:1903826)	24.64	0.00471
L-ornithine transmembrane transport (GO:1903352)	24.64	0.00471
RNA stabilization (GO:0043489)	6.16	0.00509
positive regulation of cell cycle G1/S phase transition (GO:1902808)	6.16	0.00509
regulation of intracellular steroid hormone receptor signaling pathway (GO:0033143)	4.74	0.00509
regulation of protein serine/threonine kinase activity (GO:0071900)	2.2	0.00524
macromolecule catabolic process (GO:0009057)	1.8	0.00525
protein localization to chromatin (GO:0071168)	9.24	0.00543
DNA catabolic process, endonucleolytic (GO:0000737)	9.24	0.00543
DNA methylation (GO:0006306)	6.04	0.00544
DNA alkylation (GO:0006305)	6.04	0.00544
protein deubiquitination (GO:0016579)	2.66	0.00553
cellular response to UV (GO:0034644)	4.62	0.00563
programmed cell death (GO:0012501)	1.78	0.00569
execution phase of apoptosis (GO:0097194)	5.91	0.00582
response to abiotic stimulus (GO:0009628)	1.73	0.00583
peptidyl-amino acid modification (GO:0018193)	1.9	0.00594
cellular response to oxidative stress (GO:0034599)	2.81	0.00598
positive regulation of megakaryocyte differentiation (GO:0045654)	21.12	0.00601
negative regulation of cell cycle checkpoint (GO:1901977)	21.12	0.00601
meiotic cell cycle checkpoint (GO:0033313)	21.12	0.00601
G-quadruplex DNA unwinding (GO:0044806)	21.12	0.00601
double-strand break repair via synthesis-dependent strand annealing (GO:0045003)	21.12	0.00601
spindle assembly involved in meiosis (GO:0090306)	21.12	0.00601
negative regulation of cytokinesis (GO:0032466)	21.12	0.00601
positive regulation of mitotic cell cycle spindle assembly checkpoint (GO:0090267)	21.12	0.00601
positive regulation of spindle checkpoint (GO:0090232)	21.12	0.00601
polyadenylation-dependent ncRNA catabolic process (GO:0043634)	21.12	0.00601
exonucleolytic trimming to generate mature 3'-end of 5.8S rRNA from tricistronic rRNA transcript (SSU-rRNA, 5.8S rRNA, LSU-rRNA) (GO:0000467)	21.12	0.00601
exonucleolytic trimming involved in rRNA processing (GO:0000459)	21.12	0.00601
pyrimidine deoxyribonucleoside monophosphate biosynthetic process (GO:0009177)	21.12	0.00601
gap junction assembly (GO:0016264)	21.12	0.00601
tRNA catabolic process (GO:0016078)	21.12	0.00601
tetrahydrofolate biosynthetic process (GO:0046654)	21.12	0.00601
regulation of DNA-dependent DNA replication initiation (GO:0030174)	21.12	0.00601
negative regulation of smooth muscle cell apoptotic process (GO:0034392)	21.12	0.00601
apoptotic nuclear changes (GO:0030262)	8.87	0.00602
defense response (GO:0006952)	0.39	0.00603
mRNA 3'-end processing (GO:0031124)	4.51	0.0062
regeneration (GO:0031099)	3.32	0.00639
response to alcohol (GO:0097305)	2.77	0.00646
vesicle-mediated transport (GO:0016192)	0.5	0.00647
regulation of response to stimulus (GO:0048583)	1.33	0.00648
intracellular transport of virus (GO:0075733)	5.69	0.00662
nucleobase-containing compound transport (GO:0015931)	2.76	0.00662
global genome nucleotide-excision repair (GO:0070911)	8.53	0.00665
regulation of histone H3-K9 methylation (GO:0051570)	8.53	0.00665
RNA phosphodiester bond hydrolysis (GO:0090501)	3.25	0.00703
cellular component disassembly involved in execution phase of apoptosis (GO:0006921)	8.21	0.00732
centrosome separation (GO:0051299)	18.48	0.00744
polyadenylation-dependent RNA catabolic process (GO:0043633)	18.48	0.00744
mitochondrial DNA metabolic process (GO:0032042)	18.48	0.00744
pyrimidine deoxyribonucleoside monophosphate metabolic process (GO:0009176)	18.48	0.00744
arginine transport (GO:0015809)	18.48	0.00744
U4 snRNA 3'-end processing (GO:0034475)	18.48	0.00744
RNA phosphodiester bond hydrolysis, endonucleolytic (GO:0090502)	4.3	0.00748
organelle assembly (GO:0070925)	1.97	0.0075
regulation of intracellular signal transduction (GO:1902531)	1.55	0.00769
regulation of telomere maintenance via telomerase (GO:0032210)	5.38	0.00795
spliceosomal complex assembly (GO:0000245)	5.38	0.00795
transport of virus (GO:0046794)	5.38	0.00795
cation transport (GO:0006812)	0.27	0.00803
protein modification by small protein removal (GO:0070646)	2.51	0.00815
sensory perception (GO:0007600)	0.31	0.00845
DNA catabolic process (GO:0006308)	7.65	0.00876
centrosome duplication (GO:0051298)	7.65	0.00876
DNA modification (GO:0006304)	4.11	0.00893
embryo development (GO:0009790)	1.79	0.00895
negative regulation of binding (GO:0051100)	3.1	0.009
positive regulation of cell cycle checkpoint (GO:1901978)	16.43	0.00902
positive regulation of mitotic sister chromatid separation (GO:1901970)	16.43	0.00902
basic amino acid transmembrane transport (GO:1990822)	16.43	0.00902
regulation of macrophage apoptotic process (GO:2000109)	16.43	0.00902
DNA strand renaturation (GO:0000733)	16.43	0.00902
RNA polymerase I preinitiation complex assembly (GO:0001188)	16.43	0.00902
nuclear pore complex assembly (GO:0051292)	16.43	0.00902
replication fork protection (GO:0048478)	16.43	0.00902
DNA ligation involved in DNA repair (GO:0051103)	16.43	0.00902
positive regulation of helicase activity (GO:0051096)	16.43	0.00902
rRNA 3'-end processing (GO:0031125)	16.43	0.00902
positive regulation of isomerase activity (GO:0010912)	16.43	0.00902
regulation of isomerase activity (GO:0010911)	16.43	0.00902
positive regulation of mitotic metaphase/anaphase transition (GO:0045842)	16.43	0.00902
proteolysis involved in cellular protein catabolic process (GO:0051603)	2.06	0.00906
female gamete generation (GO:0007292)	3.47	0.00929
DNA-templated transcription, elongation (GO:0006354)	4.06	0.00932
positive regulation of DNA binding (GO:0043388)	5.1	0.00945
negative regulation of mRNA processing (GO:0050686)	7.39	0.00955
protein phosphorylation (GO:0006468)	1.77	0.00963
response to light stimulus (GO:0009416)	2.44	0.00967
in utero embryonic development (GO:0001701)	2.32	0.00972
cellular response to reactive oxygen species (GO:0034614)	3.41	0.00995
rhythmic process (GO:0048511)	2.58	0.00996
negative regulation of RNA catabolic process (GO:1902369)	5.01	0.00999
regulation of meiotic nuclear division (GO:0040020)	7.15	0.0104
regulation of catabolic process (GO:0009894)	1.74	0.0104
cellular response to abiotic stimulus (GO:0071214)	2.41	0.0105
response to antibiotic (GO:0046677)	2.41	0.0105
cellular response to environmental stimulus (GO:0104004)	2.41	0.0105
ribonucleoprotein complex biogenesis (GO:0022613)	2.17	0.0107
regulation of histone H3-K9 acetylation (GO:2000615)	14.79	0.0107
positive regulation of metaphase/anaphase transition of cell cycle (GO:1902101)	14.79	0.0107
regulation of fat cell proliferation (GO:0070344)	14.79	0.0107
folic acid-containing compound biosynthetic process (GO:0009396)	14.79	0.0107
telomere maintenance in response to DNA damage (GO:0043247)	14.79	0.0107
negative regulation of ubiquitin protein ligase activity (GO:1904667)	14.79	0.0107
pyrimidine deoxyribonucleotide biosynthetic process (GO:0009221)	14.79	0.0107
nuclear-transcribed mRNA catabolic process, exonucleolytic, 3'-5' (GO:0034427)	14.79	0.0107
positive regulation of sister chromatid cohesion (GO:0045876)	14.79	0.0107
exocytosis (GO:0006887)	0.28	0.0108
cellular response to inorganic substance (GO:0071241)	2.73	0.0109
response to antineoplastic agent (GO:0097327)	3.89	0.011
DNA-templated transcription, initiation (GO:0006352)	2.71	0.0112
positive regulation of cyclin-dependent protein serine/threonine kinase activity (GO:0045737)	6.93	0.0112
2'-deoxyribonucleotide metabolic process (GO:0009394)	6.93	0.0112
regulation of hormone levels (GO:0010817)	0.14	0.0114
cellular protein catabolic process (GO:0044257)	1.96	0.0115
detection of stimulus involved in sensory perception (GO:0050906)	0.14	0.0117
regulation of mRNA stability (GO:0043488)	2.91	0.0123
protein monoubiquitination (GO:0006513)	4.69	0.0123
circadian rhythm (GO:0007623)	3.24	0.0125
histone H3-K27 methylation (GO:0070734)	13.44	0.0126
positive regulation of histone H3-K9 methylation (GO:0051574)	13.44	0.0126
positive regulation of chromosome separation (GO:1905820)	13.44	0.0126
tetrahydrofolate interconversion (GO:0035999)	13.44	0.0126
snoRNA 3'-end processing (GO:0031126)	13.44	0.0126
histone-serine phosphorylation (GO:0035404)	13.44	0.0126
purine nucleobase biosynthetic process (GO:0009113)	13.44	0.0126
positive regulation of centrosome cycle (GO:0046607)	13.44	0.0126
trophoblast giant cell differentiation (GO:0060707)	13.44	0.0126
deoxyribose phosphate metabolic process (GO:0019692)	6.52	0.0131
ion transport (GO:0006811)	0.44	0.0132
regulation of cell population proliferation (GO:0042127)	1.56	0.0133
cellular ion homeostasis (GO:0006873)	0.23	0.0138
transforming growth factor beta receptor signaling pathway (GO:0007179)	3.66	0.0139
positive regulation of RNA splicing (GO:0033120)	6.34	0.0141
negative regulation of protein binding (GO:0032091)	3.62	0.0144
deoxyribonucleoside monophosphate biosynthetic process (GO:0009157)	12.32	0.0145
negative regulation of centrosome duplication (GO:0010826)	12.32	0.0145
response to antimetabolite (GO:0097329)	12.32	0.0145
blastocyst development (GO:0001824)	3.59	0.015
DNA methylation or demethylation (GO:0044728)	4.41	0.015
peptidyl-threonine phosphorylation (GO:0018107)	4.41	0.015
cranial skeletal system development (GO:1904888)	4.41	0.015
cellular response to alkaloid (GO:0071312)	6.16	0.0151
positive regulation of cyclin-dependent protein kinase activity (GO:1904031)	6.16	0.0151
regulation of histone modification (GO:0031056)	3.08	0.0155
organonitrogen compound biosynthetic process (GO:1901566)	0.47	0.0157
protein modification by small protein conjugation (GO:0032446)	1.83	0.0157
regulation of histone methylation (GO:0031060)	4.35	0.0157
cellular response to ionizing radiation (GO:0071479)	4.29	0.0165
regulation of generation of precursor metabolites and energy (GO:0043467)	3.04	0.0165
polyamine biosynthetic process (GO:0006596)	11.37	0.0166
regulation of attachment of spindle microtubules to kinetochore (GO:0051988)	11.37	0.0166
V(D)J recombination (GO:0033151)	11.37	0.0166
positive regulation of intracellular estrogen receptor signaling pathway (GO:0033148)	11.37	0.0166
DNA ligation (GO:0006266)	11.37	0.0166
negative regulation of histone H3-K9 methylation (GO:0051573)	11.37	0.0166
kinetochore assembly (GO:0051382)	11.37	0.0166
UV protection (GO:0009650)	11.37	0.0166
positive regulation of chromatin binding (GO:0035563)	11.37	0.0166
snoRNA processing (GO:0043144)	11.37	0.0166
2'-deoxyribonucleotide biosynthetic process (GO:0009265)	11.37	0.0166
basic amino acid transport (GO:0015802)	11.37	0.0166
deoxyribose phosphate biosynthetic process (GO:0046385)	11.37	0.0166
regulation of purine nucleotide metabolic process (GO:1900542)	3.49	0.0167
negative regulation of apoptotic process (GO:0043066)	1.74	0.0167
reproductive structure development (GO:0048608)	2.11	0.0168
regulation of protein kinase activity (GO:0045859)	1.8	0.0168
regulation of anatomical structure size (GO:0090066)	0.14	0.017
import into nucleus (GO:0051170)	3.45	0.0173
regulation of chromatin silencing (GO:0031935)	5.84	0.0173
spliceosomal snRNP assembly (GO:0000387)	5.84	0.0173
reproductive system development (GO:0061458)	2.09	0.0175
regulation of nucleotide metabolic process (GO:0006140)	3.42	0.0179
negative regulation of programmed cell death (GO:0043069)	1.71	0.0181
regulation of protein ubiquitination (GO:0031396)	2.68	0.0182
positive regulation of nucleic acid-templated transcription (GO:1903508)	1.51	0.0183
positive regulation of RNA biosynthetic process (GO:1902680)	1.51	0.0184
posttranscriptional regulation of gene expression (GO:0010608)	2	0.0186
nuclear pore organization (GO:0006999)	10.56	0.0188
DNA damage response, signal transduction by p53 class mediator resulting in transcription of p21 class mediator (GO:0006978)	10.56	0.0188
negative regulation of epidermal cell differentiation (GO:0045605)	10.56	0.0188
telomere maintenance via recombination (GO:0000722)	10.56	0.0188
nuclear mRNA surveillance (GO:0071028)	10.56	0.0188
nuclear RNA surveillance (GO:0071027)	10.56	0.0188
negative regulation of centrosome cycle (GO:0046606)	10.56	0.0188
amino acid import across plasma membrane (GO:0089718)	10.56	0.0188
intrinsic apoptotic signaling pathway (GO:0097193)	2.94	0.019
cation transmembrane transport (GO:0098655)	0.24	0.0194
activation of immune response (GO:0002253)	0.24	0.0194
cellular response to transforming growth factor beta stimulus (GO:0071560)	2.92	0.0196
cortical actin cytoskeleton organization (GO:0030866)	5.54	0.0196
negative regulation of epithelial cell differentiation (GO:0030857)	5.54	0.0196
regulation of glycolytic process (GO:0006110)	4.05	0.0196
neural precursor cell proliferation (GO:0061351)	4.05	0.0196
cellular cation homeostasis (GO:0030003)	0.24	0.0197
oxidation-reduction process (GO:0055114)	0.39	0.0204
positive regulation of protein ubiquitination (GO:0031398)	3.3	0.0204
nucleoside monophosphate metabolic process (GO:0009123)	4	0.0205
regulation of locomotion (GO:0040012)	0.38	0.0205
cellular chemical homeostasis (GO:0055082)	0.3	0.0207
regulation of protein export from nucleus (GO:0046825)	5.41	0.0208
snRNA metabolic process (GO:0016073)	5.41	0.0208
cellular response to light stimulus (GO:0071482)	3.27	0.0211
mitotic sister chromatid cohesion (GO:0007064)	9.86	0.0212
positive regulation of intracellular steroid hormone receptor signaling pathway (GO:0033145)	9.86	0.0212
DNA damage response, signal transduction resulting in transcription (GO:0042772)	9.86	0.0212
deoxyribonucleoside monophosphate metabolic process (GO:0009162)	9.86	0.0212
pore complex assembly (GO:0046931)	9.86	0.0212
pteridine-containing compound biosynthetic process (GO:0042559)	9.86	0.0212
cell communication by electrical coupling involved in cardiac conduction (GO:0086064)	9.86	0.0212
regulation of RNA export from nucleus (GO:0046831)	9.86	0.0212
snoRNA metabolic process (GO:0016074)	9.86	0.0212
cardiac muscle hypertrophy in response to stress (GO:0014898)	9.86	0.0212
cardiac muscle adaptation (GO:0014887)	9.86	0.0212
muscle hypertrophy in response to stress (GO:0003299)	9.86	0.0212
regulation of signal transduction (GO:0009966)	1.33	0.0212
multi-organism process (GO:0051704)	1.39	0.0214
peptidyl-threonine modification (GO:0018210)	3.94	0.0214
regulation of mRNA catabolic process (GO:0061013)	2.59	0.0215
coenzyme metabolic process (GO:0006732)	2.38	0.0221
regulation of intracellular estrogen receptor signaling pathway (GO:0033146)	5.28	0.0221
interaction with host (GO:0051701)	2.83	0.0224
regulation of reproductive process (GO:2000241)	2.83	0.0224
regulation of ATPase activity (GO:0043462)	3.84	0.0232
regulation of epithelial cell apoptotic process (GO:1904035)	3.84	0.0232
cell fate determination (GO:0001709)	5.16	0.0234
mRNA stabilization (GO:0048255)	5.16	0.0234
cellular modified amino acid biosynthetic process (GO:0042398)	5.16	0.0234
ubiquinone biosynthetic process (GO:0006744)	9.24	0.0236
regulation of nuclear cell cycle DNA replication (GO:0033262)	9.24	0.0236
quinone biosynthetic process (GO:1901663)	9.24	0.0236
RNA surveillance (GO:0071025)	9.24	0.0236
organic substance transport (GO:0071702)	0.61	0.0237
protein heterooligomerization (GO:0051291)	3.16	0.024
immune response-regulating cell surface receptor signaling pathway (GO:0002768)	0.15	0.0241
response to transforming growth factor beta (GO:0071559)	2.77	0.0242
regulation of protein catabolic process (GO:0042176)	2.07	0.0243
cellular response to antibiotic (GO:0071236)	3.13	0.0247
positive regulation of cardiac muscle tissue development (GO:0055025)	5.04	0.0248
transcription by RNA polymerase II (GO:0006366)	1.99	0.0258
somatic diversification of immune receptors via somatic mutation (GO:0002566)	8.7	0.0261
ubiquinone metabolic process (GO:0006743)	8.7	0.0261
microtubule depolymerization (GO:0007019)	8.7	0.0261
pyrimidine nucleobase metabolic process (GO:0006206)	8.7	0.0261
positive regulation of histone H3-K4 methylation (GO:0051571)	8.7	0.0261
negative regulation of ubiquitin-protein transferase activity (GO:0051444)	8.7	0.0261
regulation of nucleobase-containing compound transport (GO:0032239)	8.7	0.0261
alternative mRNA splicing, via spliceosome (GO:0000380)	8.7	0.0261
somatic hypermutation of immunoglobulin genes (GO:0016446)	8.7	0.0261
pyrimidine nucleoside monophosphate biosynthetic process (GO:0009130)	8.7	0.0261
positive regulation of mitotic sister chromatid segregation (GO:0062033)	8.7	0.0261
positive regulation of telomere capping (GO:1904355)	8.7	0.0261
S-adenosylmethionine metabolic process (GO:0046500)	8.7	0.0261
negative regulation of fat cell differentiation (GO:0045599)	4.93	0.0262
cellular response to epidermal growth factor stimulus (GO:0071364)	4.93	0.0262
cortical cytoskeleton organization (GO:0030865)	4.93	0.0262
negative regulation of DNA recombination (GO:0045910)	4.93	0.0262
macromolecule modification (GO:0043412)	1.32	0.0265
hexitol catabolic process (GO:0019407)	73.93	0.0265
replication fork reversal (GO:0071932)	73.93	0.0265
pronuclear fusion (GO:0007344)	73.93	0.0265
protein localization to meiotic spindle midzone (GO:1903096)	73.93	0.0265
positive regulation of transforming growth factor-beta secretion (GO:2001203)	73.93	0.0265
female meiosis II (GO:0007147)	73.93	0.0265
protein localization to mitotic spindle (GO:1902480)	73.93	0.0265
deactivation of mitotic spindle assembly checkpoint (GO:1902426)	73.93	0.0265
immortalization of host cell by virus (GO:0019088)	73.93	0.0265
meiotic spindle assembly checkpoint (GO:0033316)	73.93	0.0265
cell cycle comprising mitosis without cytokinesis (GO:0033301)	73.93	0.0265
DNA strand elongation involved in nuclear cell cycle DNA replication (GO:1902319)	73.93	0.0265
synthesis of RNA primer involved in nuclear cell cycle DNA replication (GO:1902318)	73.93	0.0265
nuclear cell cycle DNA replication initiation (GO:1902315)	73.93	0.0265
S-adenosylmethioninamine biosynthetic process (GO:0006557)	73.93	0.0265
hepatocyte dedifferentiation (GO:1990828)	73.93	0.0265
meiotic spindle checkpoint (GO:0044779)	73.93	0.0265
DNA strand elongation involved in cell cycle DNA replication (GO:1902296)	73.93	0.0265
synthesis of RNA primer involved in cell cycle DNA replication (GO:1902295)	73.93	0.0265
cell cycle DNA replication initiation (GO:1902292)	73.93	0.0265
peptidyl-glutamic acid poly-ADP-ribosylation (GO:0018424)	73.93	0.0265
negative regulation of timing of anagen (GO:0051886)	73.93	0.0265
tumor necrosis factor secretion (GO:1990774)	73.93	0.0265
translocation of peptides or proteins into other organism involved in symbiotic interaction (GO:0051808)	73.93	0.0265
septin ring assembly (GO:0000921)	73.93	0.0265
positive regulation of cellular response to alcohol (GO:1905959)	73.93	0.0265
regulation of cellular response to alcohol (GO:1905957)	73.93	0.0265
positive regulation of response to alcohol (GO:1901421)	73.93	0.0265
regulation of response to alcohol (GO:1901419)	73.93	0.0265
negative regulation of spindle checkpoint (GO:0090233)	73.93	0.0265
sorbitol catabolic process (GO:0006062)	73.93	0.0265
karyogamy (GO:0000741)	73.93	0.0265
positive regulation of histone H4-K20 methylation (GO:0070512)	73.93	0.0265
regulation of histone H4-K20 methylation (GO:0070510)	73.93	0.0265
positive regulation of abscisic acid-activated signaling pathway (GO:0009789)	73.93	0.0265
regulation of abscisic acid-activated signaling pathway (GO:0009787)	73.93	0.0265
translocation of peptides or proteins into host cell cytoplasm (GO:0044053)	73.93	0.0265
regulation of restriction endodeoxyribonuclease activity (GO:0032072)	73.93	0.0265
L-xylitol metabolic process (GO:0051164)	73.93	0.0265
L-xylitol catabolic process (GO:0051160)	73.93	0.0265
hepatocyte homeostasis (GO:0036333)	73.93	0.0265
protein localization to meiotic spindle (GO:1905359)	73.93	0.0265
negative regulation of protein localization to kinetochore (GO:1905341)	73.93	0.0265
mitochondrial asparaginyl-tRNA aminoacylation (GO:0070145)	73.93	0.0265
response to tetrachloromethane (GO:1904772)	73.93	0.0265
positive regulation of myofibroblast differentiation (GO:1904762)	73.93	0.0265
cell-abiotic substrate adhesion (GO:0036164)	73.93	0.0265
cellular response to putrescine (GO:1904586)	73.93	0.0265
response to putrescine (GO:1904585)	73.93	0.0265
seminal vesicle morphogenesis (GO:0061682)	73.93	0.0265
regulation of proton-transporting ATPase activity, rotational mechanism (GO:0010849)	73.93	0.0265
regulation of ubiquinone biosynthetic process (GO:0010795)	73.93	0.0265
S-adenosylmethioninamine metabolic process (GO:0046499)	73.93	0.0265
translocation of peptides or proteins into host (GO:0042000)	73.93	0.0265
DNA strand elongation involved in mitotic DNA replication (GO:1902983)	73.93	0.0265
synthesis of RNA primer involved in mitotic DNA replication (GO:1902981)	73.93	0.0265
mitotic DNA replication preinitiation complex assembly (GO:1902977)	73.93	0.0265
mitotic DNA replication initiation (GO:1902975)	73.93	0.0265
pentitol catabolic process (GO:0019527)	73.93	0.0265
pentitol metabolic process (GO:0019519)	73.93	0.0265
sinoatrial valve morphogenesis (GO:0003185)	73.93	0.0265
sinoatrial valve development (GO:0003172)	73.93	0.0265
primary heart field specification (GO:0003138)	73.93	0.0265
protein catabolic process (GO:0030163)	1.77	0.0268
response to external stimulus (GO:0009605)	0.61	0.0269
immune response-regulating signaling pathway (GO:0002764)	0.25	0.0271
negative regulation of response to DNA damage stimulus (GO:2001021)	3.65	0.0271
regulation of carbohydrate catabolic process (GO:0043470)	3.65	0.0271
regulation of erythrocyte differentiation (GO:0045646)	4.82	0.0276
embryonic cranial skeleton morphogenesis (GO:0048701)	4.82	0.0276
nucleoside monophosphate biosynthetic process (GO:0009124)	4.82	0.0276
regulation of microtubule polymerization or depolymerization (GO:0031110)	3.61	0.0281
regulated exocytosis (GO:0045055)	0.32	0.0282
cation homeostasis (GO:0055080)	0.32	0.0283
somatic diversification of immunoglobulins involved in immune response (GO:0002208)	8.21	0.0288
somatic recombination of immunoglobulin genes involved in immune response (GO:0002204)	8.21	0.0288
centriole replication (GO:0007099)	8.21	0.0288
polyamine metabolic process (GO:0006595)	8.21	0.0288
isotype switching (GO:0045190)	8.21	0.0288
regulation of gene expression by genetic imprinting (GO:0006349)	8.21	0.0288
regulation of vascular endothelial cell proliferation (GO:1905562)	8.21	0.0288
mitochondrial genome maintenance (GO:0000002)	8.21	0.0288
deoxyribonucleoside triphosphate metabolic process (GO:0009200)	8.21	0.0288
ventricular cardiac muscle cell differentiation (GO:0055012)	8.21	0.0288
pyrimidine nucleoside monophosphate metabolic process (GO:0009129)	8.21	0.0288
determination of adult lifespan (GO:0008340)	8.21	0.0288
cell communication by electrical coupling (GO:0010644)	8.21	0.0288
sexual reproduction (GO:0019953)	1.71	0.0296
negative regulation of ubiquitin-dependent protein catabolic process (GO:2000059)	4.62	0.0306
ncRNA 3'-end processing (GO:0043628)	4.62	0.0306
chordate embryonic development (GO:0043009)	1.82	0.0307
regulation of protein phosphorylation (GO:0001932)	1.51	0.0315
nucleobase biosynthetic process (GO:0046112)	7.78	0.0315
positive regulation of cardiac muscle cell differentiation (GO:2000727)	7.78	0.0315
nucleosome disassembly (GO:0006337)	7.78	0.0315
mitotic recombination (GO:0006312)	7.78	0.0315
negative regulation of release of cytochrome c from mitochondria (GO:0090201)	7.78	0.0315
chromatin disassembly (GO:0031498)	7.78	0.0315
amino acid import (GO:0043090)	7.78	0.0315
telomere capping (GO:0016233)	7.78	0.0315
rRNA catabolic process (GO:0016075)	7.78	0.0315
folic acid metabolic process (GO:0046655)	7.78	0.0315
regulation of immune response (GO:0050776)	0.46	0.0316
protein complex oligomerization (GO:0051259)	1.87	0.032
response to epidermal growth factor (GO:0070849)	4.53	0.0322
microtubule polymerization or depolymerization (GO:0031109)	4.53	0.0322
positive regulation of cell division (GO:0051781)	3.44	0.0325
regulation of protein modification by small protein conjugation or removal (GO:1903320)	2.35	0.0332
cellular response to nerve growth factor stimulus (GO:1990090)	4.44	0.0338
immune response-activating cell surface receptor signaling pathway (GO:0002429)	0.17	0.034
cellular response to organonitrogen compound (GO:0071417)	1.84	0.0343
glycine metabolic process (GO:0006544)	7.39	0.0344
oocyte maturation (GO:0001556)	7.39	0.0344
cellular response to platelet-derived growth factor stimulus (GO:0036120)	7.39	0.0344
melanocyte differentiation (GO:0030318)	7.39	0.0344
embryo development ending in birth or egg hatching (GO:0009792)	1.76	0.0347
cellular protein modification process (GO:0006464)	1.32	0.0348
protein modification process (GO:0036211)	1.32	0.0348
regulation of leukocyte apoptotic process (GO:2000106)	3.36	0.0348
regulation of ubiquitin-protein transferase activity (GO:0051438)	4.35	0.0354
cochlea development (GO:0090102)	4.35	0.0354
regulation of kinase activity (GO:0043549)	1.63	0.0355
antigen processing and presentation of exogenous peptide antigen (GO:0002478)	2.52	0.0357
pallium development (GO:0021543)	2.52	0.0357
positive regulation of protein modification by small protein conjugation or removal (GO:1903322)	2.82	0.0359
regulation of cell motility (GO:2000145)	0.42	0.036
ion transmembrane transport (GO:0034220)	0.41	0.0367
nucleobase-containing compound catabolic process (GO:0034655)	2.01	0.0367
negative regulation of mRNA catabolic process (GO:1902373)	4.27	0.0371
positive regulation of histone modification (GO:0031058)	3.29	0.0372
protein-DNA complex disassembly (GO:0032986)	7.04	0.0373
purine nucleobase metabolic process (GO:0006144)	7.04	0.0373
cleavage involved in rRNA processing (GO:0000469)	7.04	0.0373
maturation of 5.8S rRNA from tricistronic rRNA transcript (SSU-rRNA, 5.8S rRNA, LSU-rRNA) (GO:0000466)	7.04	0.0373
dendritic cell migration (GO:0036336)	7.04	0.0373
response to platelet-derived growth factor (GO:0036119)	7.04	0.0373
negative regulation of mRNA splicing, via spliceosome (GO:0048025)	7.04	0.0373
pyrimidine deoxyribonucleotide metabolic process (GO:0009219)	7.04	0.0373
positive regulation of protein export from nucleus (GO:0046827)	7.04	0.0373
endocytosis (GO:0006897)	0.27	0.0374
cellular metal ion homeostasis (GO:0006875)	0.27	0.0375
immune response-activating signal transduction (GO:0002757)	0.27	0.0375
regulation of transmembrane transport (GO:0034762)	0.27	0.0375
positive regulation of transcription, DNA-templated (GO:0045893)	1.45	0.0388
positive regulation of ATPase activity (GO:0032781)	4.18	0.0388
response to nerve growth factor (GO:1990089)	4.18	0.0388
positive regulation of fibroblast proliferation (GO:0048146)	4.18	0.0388
regulation of histone acetylation (GO:0035065)	4.18	0.0388
cellular component morphogenesis (GO:0032989)	0.37	0.0388
bronchus morphogenesis (GO:0060434)	36.96	0.0395
nitric oxide production involved in inflammatory response (GO:0002537)	36.96	0.0395
positive regulation of histone H3-K36 trimethylation (GO:2001255)	36.96	0.0395
glycine biosynthetic process from serine (GO:0019264)	36.96	0.0395
regulation of DNA replication origin binding (GO:1902595)	36.96	0.0395
multi-organism nuclear import (GO:1902594)	36.96	0.0395
positive regulation of mediator complex assembly (GO:2001178)	36.96	0.0395
regulation of mediator complex assembly (GO:2001176)	36.96	0.0395
nephron tubule epithelial cell differentiation (GO:0072160)	36.96	0.0395
positive regulation of histone H4-K16 acetylation (GO:2000620)	36.96	0.0395
positive regulation of DNA endoreduplication (GO:0032877)	36.96	0.0395
spermine biosynthetic process (GO:0006597)	36.96	0.0395
sequestering of BMP from receptor via BMP binding (GO:0038098)	36.96	0.0395
cell cycle DNA replication maintenance of fidelity (GO:1902298)	36.96	0.0395
negative regulation of apoptotic cell clearance (GO:2000426)	36.96	0.0395
desensitization of G protein-coupled receptor signaling pathway by arrestin (GO:0002032)	36.96	0.0395
viral penetration into host nucleus (GO:0075732)	36.96	0.0395
negative regulation of metaphase/anaphase transition of meiotic cell cycle (GO:1902103)	36.96	0.0395
DNA replication proofreading (GO:0045004)	36.96	0.0395
negative regulation of oxidative phosphorylation uncoupler activity (GO:2000276)	36.96	0.0395
negative regulation of vascular smooth muscle cell differentiation involved in phenotypic switching (GO:1905931)	36.96	0.0395
negative regulation of cell differentiation involved in phenotypic switching (GO:1905916)	36.96	0.0395
mitotic DNA replication maintenance of fidelity (GO:1990505)	36.96	0.0395
negative regulation of hair follicle maturation (GO:0048817)	36.96	0.0395
mitotic recombination-dependent replication fork processing (GO:1990426)	36.96	0.0395
regulation of chromatin silencing at telomere (GO:0031938)	36.96	0.0395
sorbitol metabolic process (GO:0006060)	36.96	0.0395
strand displacement (GO:0000732)	36.96	0.0395
negative regulation of DNA helicase activity (GO:1905775)	36.96	0.0395
nuclear retention of pre-mRNA with aberrant 3'-ends at the site of transcription (GO:0071049)	36.96	0.0395
nuclear mRNA surveillance of mRNA 3'-end processing (GO:0071031)	36.96	0.0395
response to rapamycin (GO:1901355)	36.96	0.0395
response to leptomycin B (GO:1901344)	36.96	0.0395
positive regulation of DNA-dependent DNA replication initiation (GO:0032298)	36.96	0.0395
negative regulation of nucleobase-containing compound transport (GO:0032240)	36.96	0.0395
tRNA (guanine-N7)-methylation (GO:0106004)	36.96	0.0395
positive regulation of telomerase RNA reverse transcriptase activity (GO:1905663)	36.96	0.0395
negative regulation of double-strand break repair via single-strand annealing (GO:1901291)	36.96	0.0395
female meiosis chromosome separation (GO:0051309)	36.96	0.0395
protein localization to actomyosin contractile ring (GO:1990179)	36.96	0.0395
telomeric loop formation (GO:0031627)	36.96	0.0395
box H/ACA snoRNA 3'-end processing (GO:0000495)	36.96	0.0395
enzyme-directed rRNA pseudouridine synthesis (GO:0000455)	36.96	0.0395
immortalization of host cell (GO:0020021)	36.96	0.0395
negative regulation of vascular associated smooth muscle cell apoptotic process (GO:1905460)	36.96	0.0395
pericentric heterochromatin assembly (GO:0031508)	36.96	0.0395
re-entry into mitotic cell cycle (GO:0000320)	36.96	0.0395
eosinophil fate commitment (GO:0035854)	36.96	0.0395
positive regulation of mesenchymal stem cell migration (GO:1905322)	36.96	0.0395
regulation of mesenchymal stem cell migration (GO:1905320)	36.96	0.0395
nucleologenesis (GO:0017126)	36.96	0.0395
T-helper 1 cell activation (GO:0035711)	36.96	0.0395
negative regulation of RNA polymerase II transcriptional preinitiation complex assembly (GO:0017055)	36.96	0.0395
negative regulation of meiotic chromosome separation (GO:1905133)	36.96	0.0395
negative regulation of phenotypic switching (GO:1900240)	36.96	0.0395
septin ring organization (GO:0031106)	36.96	0.0395
positive regulation of oocyte maturation (GO:1900195)	36.96	0.0395
chromosome breakage (GO:0031052)	36.96	0.0395
histone H3-T11 phosphorylation (GO:0035407)	36.96	0.0395
programmed DNA elimination (GO:0031049)	36.96	0.0395
protein localization to mitotic actomyosin contractile ring (GO:1904498)	36.96	0.0395
cellular response to tetrahydrofolate (GO:1904482)	36.96	0.0395
response to tetrahydrofolate (GO:1904481)	36.96	0.0395
box H/ACA snoRNA processing (GO:0034964)	36.96	0.0395
AV node cell to bundle of His cell communication by electrical coupling (GO:0086053)	36.96	0.0395
SA node cell to atrial cardiac muscle cell communication by electrical coupling (GO:0086021)	36.96	0.0395
negative regulation of RNA export from nucleus (GO:0046832)	36.96	0.0395
heteroduplex formation (GO:0030491)	36.96	0.0395
regulation of primitive erythrocyte differentiation (GO:0010725)	36.96	0.0395
positive regulation of bleb assembly (GO:1904172)	36.96	0.0395
regulation of bleb assembly (GO:1904170)	36.96	0.0395
positive regulation of single strand break repair (GO:1903518)	36.96	0.0395
cellular response to leptomycin B (GO:0072750)	36.96	0.0395
protein localization to cell division site (GO:0072741)	36.96	0.0395
regulation of T cell mediated immune response to tumor cell (GO:0002840)	36.96	0.0395
DNA methylation on cytosine within a CG sequence (GO:0010424)	36.96	0.0395
fructose biosynthetic process (GO:0046370)	36.96	0.0395
muscle cell fate determination (GO:0007521)	36.96	0.0395
regulation of ion transport (GO:0043269)	0.32	0.0397
cellular macromolecule localization (GO:0070727)	1.46	0.0403
regulation of double-strand break repair via nonhomologous end joining (GO:2001032)	6.72	0.0404
positive regulation of meiotic cell cycle (GO:0051446)	6.72	0.0404
regulation of protein homodimerization activity (GO:0043496)	6.72	0.0404
somatic recombination of immunoglobulin gene segments (GO:0016447)	6.72	0.0404
regulation of chromatin binding (GO:0035561)	6.72	0.0404
negative regulation of histone methylation (GO:0031061)	6.72	0.0404
response to bronchodilator (GO:0097366)	4.11	0.0406
gamete generation (GO:0007276)	1.73	0.0411
chemical homeostasis (GO:0048878)	0.47	0.0415
antigen processing and presentation of exogenous antigen (GO:0019884)	2.42	0.0417
negative regulation of DNA binding (GO:0043392)	4.03	0.0424
response to gamma radiation (GO:0010332)	4.03	0.0424
maintenance of cell number (GO:0098727)	2.68	0.043
coenzyme biosynthetic process (GO:0009108)	2.68	0.043
response to oxidative stress (GO:0006979)	1.94	0.0434
telomere maintenance via telomerase (GO:0007004)	6.43	0.0435
genetic imprinting (GO:0071514)	6.43	0.0435
centriole assembly (GO:0098534)	6.43	0.0435
establishment of mitotic spindle orientation (GO:0000132)	6.43	0.0435
cellular biogenic amine biosynthetic process (GO:0042401)	6.43	0.0435
negative regulation of ATP metabolic process (GO:1903579)	6.43	0.0435
ciliary basal body-plasma membrane docking (GO:0097711)	3.11	0.0437
proteolysis (GO:0006508)	1.51	0.044
cellular response to nitrogen compound (GO:1901699)	1.76	0.0442
regulation of cellular component movement (GO:0051270)	0.46	0.0443
antigen processing and presentation of peptide antigen (GO:0048002)	2.38	0.0444
multicellular organismal reproductive process (GO:0048609)	1.62	0.0447
protein tetramerization (GO:0051262)	2.64	0.0452
regulation of proteasomal protein catabolic process (GO:0061136)	2.37	0.0453
homologous chromosome segregation (GO:0045143)	3.89	0.0461
alditol metabolic process (GO:0019400)	6.16	0.0467
regulation of DNA methylation (GO:0044030)	6.16	0.0467
amine biosynthetic process (GO:0009309)	6.16	0.0467
regulation of smooth muscle cell apoptotic process (GO:0034391)	6.16	0.0467
forebrain development (GO:0030900)	1.9	0.0475
negative regulation of cell death (GO:0060548)	1.57	0.0475
monovalent inorganic cation transport (GO:0015672)	0.18	0.0478
cellular response to oxygen-containing compound (GO:1901701)	1.56	0.0478
positive regulation of osteoblast differentiation (GO:0045669)	3.82	0.048
negative regulation of reproductive process (GO:2000242)	3.82	0.048
neural retina development (GO:0003407)	3.82	0.048
regulation of organelle assembly (GO:1902115)	2.33	0.0482
response to reactive oxygen species (GO:0000302)	2.33	0.0482
epidermis development (GO:0008544)	0.18	0.0483
cellular response to growth factor stimulus (GO:0071363)	1.79	0.0485
peptide biosynthetic process (GO:0043043)	0.18	0.0487
generation of precursor metabolites and energy (GO:0006091)	0.17	0.05
