# Supplementary material for: Replicative and radiation-induced aging: a comparison of gene expression profiles
Source: Aging (Albany NY). 2019 Apr 19;11(8):2378–87. doi: 10.18632/aging.101921 (PMC6520014; doi:10.18632/aging.101921)
Supplement: Supplemental Table S2 [file aging-11-101921-s002.xlsx]

## Sheet: GSE59861_3h_EMTAB2086
X1_sets_EMTAB2086_70_vs_30	X1_sets_EMTAB2086_80_vs_30	X1_sets_GSE59861_3h_2Gy	X1_sets_GSE59861_3h_5cGy	X2_sets_EMTAB2086_70_vs_30_EMTAB2086_80_vs_30	X2_sets_EMTAB2086_70_vs_30_GSE59861_3h_2Gy	X2_sets_EMTAB2086_70_vs_30_GSE59861_3h_5cGy	X2_sets_EMTAB2086_80_vs_30_GSE59861_3h_2Gy	X2_sets_EMTAB2086_80_vs_30_GSE59861_3h_5cGy	X2_sets_GSE59861_3h_2Gy_GSE59861_3h_5cGy	X3_sets_EMTAB2086_70_vs_30_EMTAB2086_80_vs_30_GSE59861_3h_2Gy	X3_sets_EMTAB2086_70_vs_30_EMTAB2086_80_vs_30_GSE59861_3h_5cGy	X3_sets_EMTAB2086_70_vs_30_GSE59861_3h_2Gy_GSE59861_3h_5cGy	X3_sets_EMTAB2086_80_vs_30_GSE59861_3h_2Gy_GSE59861_3h_5cGy	X4_sets_EMTAB2086_70_vs_30_EMTAB2086_80_vs_30_GSE59861_3h_2Gy_GSE59861_3h_5cGy
Akt_Signaling_Pathway_Increased_GLUT4_translocation	AHR_Pathway	BRCA1_Pathway_G1_S_arrest	NA	Akt_Signaling_Pathway_Increased_GLUT4_translocation	BRCA1_Pathway_G1_S_arrest	NA	ILK_Signaling_Pathway_Induced_Cell_Proliferation	NA	NA	NA	NA	NA	NA	NA
Akt_Signaling_Pathway_Promotes_Adipogenesis	AHR_Pathway_Cath_D_expression_via_SP1	Estrogen_Pathway_Vasodilatation	NA	Akt_Signaling_Pathway_Promotes_Adipogenesis	NA	NA	reactome_Regulation_of_gene_expression_in_endocrine_committed_NEUROG3_progenitor_cells_Main_Pathway	NA	NA	NA	NA	NA	NA	NA
Akt_Signaling_Pathway_Survival_Genes	AHR_Pathway_PS2_Gene_expression_via_ESR1	ILK_Signaling_Pathway_Induced_Cell_Proliferation	NA	Akt_Signaling_Pathway_Survival_Genes	NA	NA	NA	NA	NA	NA	NA	NA	NA	NA
ATM_Pathway	Akt_Signaling_Pathway	KEGG_D_Arginine_and_D_ornithine_metabolism_Main_Pathway	NA	ATM_Pathway	NA	NA	NA	NA	NA	NA	NA	NA	NA	NA
ATM_Pathway_G2-Mitosis_progression	Akt_Signaling_Pathway_Blood_cell_differentiation	NCI_Downstream_signaling_in_naive_CD8_T_cells_Pathway_(alpha_beta_T_cell_proliferation)	NA	ATM_Pathway_G2-Mitosis_progression	NA	NA	NA	NA	NA	NA	NA	NA	NA	NA
ATM_Pathway_G2_M_Checkpoint_Arrest	Akt_Signaling_Pathway_Cell_Cycle	reactome_Organic_anion_transport_Main_Pathway	NA	ATM_Pathway_G2_M_Checkpoint_Arrest	NA	NA	NA	NA	NA	NA	NA	NA	NA	NA
BRCA1_Pathway_E2_Responsive_Genes	Akt_Signaling_Pathway_Cell_Cycle_Progression	reactome_Regulation_of_gene_expression_in_endocrine_committed_NEUROG3_progenitor_cells_Main_Pathway	NA	KEGG_Allograft_rejection_Main_Pathway	NA	NA	NA	NA	NA	NA	NA	NA	NA	NA
BRCA1_Pathway_G1_S_arrest	Akt_Signaling_Pathway_Cell_Survival	NA	NA	KEGG_Cell_cycle_Main_Pathway	NA	NA	NA	NA	NA	NA	NA	NA	NA	NA
CD40_Pathway_Gene_Expression_Cell_Adhesion_Molecule_via_NFKB2	Akt_Signaling_Pathway_Genetic_Stability	NA	NA	KEGG_Glycosaminoglycan_degradation_Main_Pathway	NA	NA	NA	NA	NA	NA	NA	NA	NA	NA
CD40_Pathway_Gene_Expression_Cell_Survival_via_NFKB2	Akt_Signaling_Pathway_Glucose_Uptake	NA	NA	KEGG_Mineral_absorption_Main_Pathway	NA	NA	NA	NA	NA	NA	NA	NA	NA	NA
CD40_Pathway_Gene_Expression_Co-Stimulatory_Molecules_via_NFKB2	Akt_Signaling_Pathway_Increased_GLUT4_translocation	NA	NA	KEGG_p53_signaling_Main_Pathway	NA	NA	NA	NA	NA	NA	NA	NA	NA	NA
CD40_Pathway_Gene_Expression_COX2_and_Prostaglandins_via_NFKB2	Akt_Signaling_Pathway_Induction_of_Chromatin_Condensation	NA	NA	KEGG_Prion_diseases_Main_Pathway	NA	NA	NA	NA	NA	NA	NA	NA	NA	NA
CD40_Pathway_Gene_Expression_Immunoglobulin_Class_Switch_via_NFKB2	Akt_Signaling_Pathway_JNK_mediated_apoptosis	NA	NA	KEGG_Synaptic_vesicle_cycle_Main_Pathway	NA	NA	NA	NA	NA	NA	NA	NA	NA	NA
CD40_Pathway_Gene_Expression_Pro-Inflamatory_Cytokines_via_NFKB2	Akt_Signaling_Pathway_Promotes_Adipogenesis	NA	NA	NCI_Alpha6_beta4_integrin_ligand_interactions_Main_Pathway	NA	NA	NA	NA	NA	NA	NA	NA	NA	NA
CD40_Pathway_Gene_Expression_Procoagulant_Activity_via_NFKB2	Akt_Signaling_Pathway_Regulation_of_Na+_Transport	NA	NA	NCI_Angiopoietin_receptor_Tie2_mediated_signaling_Main_Pathway	NA	NA	NA	NA	NA	NA	NA	NA	NA	NA
Cellular_Apoptosis_Pathway_Gene_Expression_FLIP_CIAP2_BFL1_BCL2_via_NFKB2	Akt_Signaling_Pathway_Splicing_Regulation	NA	NA	NCI_Arf6_downstream_Pathway_(cortical_actin_cytoskeleton_organization)	NA	NA	NA	NA	NA	NA	NA	NA	NA	NA
Erythropoietin_Pathway_Gene_Expression_Neuroprotection_via_NFKB2	Akt_Signaling_Pathway_Survival_Genes	NA	NA	NCI_Arf6_downstream_Pathway_(lamellipodium_assembly)	NA	NA	NA	NA	NA	NA	NA	NA	NA	NA
KEGG_Allograft_rejection_Main_Pathway	Akt_Signaling_Pathway_Tumor_Supression	NA	NA	NCI_Arf6_trafficking_events_Pathway_(endocytosis)	NA	NA	NA	NA	NA	NA	NA	NA	NA	NA
KEGG_Cell_cycle_Main_Pathway	ATM_Pathway	NA	NA	NCI_Beta1_integrin_cell_surface_interactions_Main_Pathway	NA	NA	NA	NA	NA	NA	NA	NA	NA	NA
KEGG_Glycosaminoglycan_degradation_Main_Pathway	ATM_Pathway_Cell_Survival	NA	NA	NCI_Beta3_integrin_cell_surface_interactions_Main_Pathway	NA	NA	NA	NA	NA	NA	NA	NA	NA	NA
KEGG_Mineral_absorption_Main_Pathway	ATM_Pathway_G2-Mitosis_progression	NA	NA	NCI_Beta5_beta6_beta7_and_beta8_integrin_cell_surface_interactions_Main_Pathway	NA	NA	NA	NA	NA	NA	NA	NA	NA	NA
KEGG_p53_signaling_Main_Pathway	ATM_Pathway_G2_M_Checkpoint_Arrest	NA	NA	NCI_Caspase_Cascade_in_Apoptosis_Pathway_(apoptotic_nuclear_changes)	NA	NA	NA	NA	NA	NA	NA	NA	NA	NA
KEGG_Prion_diseases_Main_Pathway	cAMP_Pathway_Cytokine_Production	NA	NA	NCI_Class_I_PI3K_signaling_events_mediated_by_Akt_Pathway_(negative_regulation_of_cell_cycle)	NA	NA	NA	NA	NA	NA	NA	NA	NA	NA
KEGG_Synaptic_vesicle_cycle_Main_Pathway	cAMP_Pathway_Glycolisis	NA	NA	NCI_Coregulation_of_Androgen_receptor_activity_Main_Pathway	NA	NA	NA	NA	NA	NA	NA	NA	NA	NA
MAPK_Signaling_Pathway_Cell_Survival	CD40_Pathway_Cell_Survival	NA	NA	NCI_Coregulation_of_Androgen_receptor_activity_Pathway_(cell_proliferation)	NA	NA	NA	NA	NA	NA	NA	NA	NA	NA
mTOR_Pathway_Inflammation_Stress_Resistance	Cellular_Apoptosis_Pathway	NA	NA	NCI_CXCR3_mediated_signaling_events_Pathway_(regulation_of_stress_fiber_assembly)	NA	NA	NA	NA	NA	NA	NA	NA	NA	NA
NCI_Alpha6_beta4_integrin_ligand_interactions_Main_Pathway	Cellular_Apoptosis_Pathway_DNA_Fragmentation	NA	NA	NCI_E2F_transcription_factor_network_Main_Pathway	NA	NA	NA	NA	NA	NA	NA	NA	NA	NA
NCI_Alternative_NF_kappaB_Main_Pathway	Circadian_Pathway	NA	NA	NCI_EGFR_dependent_Endothelin_signaling_events_Main_Pathway	NA	NA	NA	NA	NA	NA	NA	NA	NA	NA
NCI_Alternative_NF_kappaB_Pathway_(regulation_of_B_cell_activation)	CREB_Pathway	NA	NA	NCI_Endothelins_Main_Pathway	NA	NA	NA	NA	NA	NA	NA	NA	NA	NA
NCI_Angiopoietin_receptor_Tie2_mediated_signaling_Main_Pathway	EGF_Pathway_Cytoskeleton_Regulation	NA	NA	NCI_Endothelins_Pathway_(cAMP_biosynthetic_process)	NA	NA	NA	NA	NA	NA	NA	NA	NA	NA
NCI_Arf6_downstream_Pathway_(cortical_actin_cytoskeleton_organization)	EGF_Pathway_EGFR_Endocytosis	NA	NA	NCI_Endothelins_Pathway_(positive_regulation_of_muscle_contraction)	NA	NA	NA	NA	NA	NA	NA	NA	NA	NA
NCI_Arf6_downstream_Pathway_(lamellipodium_assembly)	EGF_Pathway_IP3_Signaling	NA	NA	NCI_EPHA2_forward_signaling_Main_Pathway	NA	NA	NA	NA	NA	NA	NA	NA	NA	NA
NCI_Arf6_trafficking_events_Pathway_(endocytosis)	ERK_Signaling_Pathway	NA	NA	NCI_ErbB4_signaling_events_Pathway_(apoptosis)	NA	NA	NA	NA	NA	NA	NA	NA	NA	NA
NCI_Beta1_integrin_cell_surface_interactions_Main_Pathway	ERK_Signaling_Pathway_EGFR_signaling	NA	NA	NCI_ErbB4_signaling_events_Pathway_(axon_guidance)	NA	NA	NA	NA	NA	NA	NA	NA	NA	NA
NCI_Beta3_integrin_cell_surface_interactions_Main_Pathway	Estrogen_Pathway	NA	NA	NCI_ErbB4_signaling_events_Pathway_(cell_proliferation)	NA	NA	NA	NA	NA	NA	NA	NA	NA	NA
NCI_Beta5_beta6_beta7_and_beta8_integrin_cell_surface_interactions_Main_Pathway	FLT3_Signaling_Pathway_Translation	NA	NA	NCI_ErbB4_signaling_events_Pathway_(chemotaxis)	NA	NA	NA	NA	NA	NA	NA	NA	NA	NA
NCI_Caspase_Cascade_in_Apoptosis_Pathway_(apoptotic_nuclear_changes)	Growth_Hormone_Signaling_Pathway	NA	NA	NCI_ErbB4_signaling_events_Pathway_(dendrite_morphogenesis)	NA	NA	NA	NA	NA	NA	NA	NA	NA	NA
NCI_Caspase_Cascade_in_Apoptosis_Pathway_(neuron_apoptosis)	Growth_Hormone_Signaling_Pathway_Cell_Survival	NA	NA	NCI_ErbB4_signaling_events_Pathway_(epithelial_cell_differentiation)	NA	NA	NA	NA	NA	NA	NA	NA	NA	NA
NCI_CD40_CD40L_signaling_Pathway_(proteasomal_ubiquitin_dependent_protein_catabolic_process)	Growth_Hormone_Signaling_Pathway_Gene_Expression_via_SRF_ELK1_STAT5B_CEBPD_STAT1_STAT3	NA	NA	NCI_ErbB4_signaling_events_Pathway_(heart_development)	NA	NA	NA	NA	NA	NA	NA	NA	NA	NA
NCI_Class_I_PI3K_signaling_events_mediated_by_Akt_Pathway_(negative_regulation_of_cell_cycle)	Growth_Hormone_Signaling_Pathway_Glucose_Uptake	NA	NA	NCI_ErbB4_signaling_events_Pathway_(neural_crest_cell_migration)	NA	NA	NA	NA	NA	NA	NA	NA	NA	NA
NCI_Coregulation_of_Androgen_receptor_activity_Main_Pathway	Growth_Hormone_Signaling_Pathway_Protein_Synthesis	NA	NA	NCI_FAS_CD95_signaling_Main_Pathway	NA	NA	NA	NA	NA	NA	NA	NA	NA	NA
NCI_Coregulation_of_Androgen_receptor_activity_Pathway_(cell_proliferation)	GSK3_Signaling_Pathway_Protein_Synthesis	NA	NA	NCI_FAS_CD95_signaling_Pathway_(neuron_projection_development)	NA	NA	NA	NA	NA	NA	NA	NA	NA	NA
NCI_CXCR3_mediated_signaling_events_Pathway_(regulation_of_stress_fiber_assembly)	HIF1Alpha_Pathway_Gene_Expression_via_JUN_CREB3	NA	NA	NCI_Glypican_1_network_Main_Pathway	NA	NA	NA	NA	NA	NA	NA	NA	NA	NA
NCI_E2F_transcription_factor_network_Main_Pathway	HIF1Alpha_Pathway_HIF1a_Degradation	NA	NA	NCI_Glypican_1_network_Pathway_(BMP_signaling_pathway)	NA	NA	NA	NA	NA	NA	NA	NA	NA	NA
NCI_EGFR_dependent_Endothelin_signaling_events_Main_Pathway	HIF1Alpha_Pathway_NOS_Pathway	NA	NA	NCI_Glypican_1_network_Pathway_(cell_growth)	NA	NA	NA	NA	NA	NA	NA	NA	NA	NA
NCI_Endothelins_Main_Pathway	HIF1Alpha_Pathway_VEGF_Pathway	NA	NA	NCI_Glypican_1_network_Pathway_(fibroblast_growth_factor_receptor_signaling_pathway)	NA	NA	NA	NA	NA	NA	NA	NA	NA	NA
NCI_Endothelins_Pathway_(cAMP_biosynthetic_process)	IGF1R_Signaling_Pathway	NA	NA	NCI_p53_Main_Pathway	NA	NA	NA	NA	NA	NA	NA	NA	NA	NA
NCI_Endothelins_Pathway_(positive_regulation_of_muscle_contraction)	IGF1R_Signaling_Pathway_Cell_Migration	NA	NA	NCI_p53_Pathway_(apoptosis)	NA	NA	NA	NA	NA	NA	NA	NA	NA	NA
NCI_EPHA2_forward_signaling_Main_Pathway	IL-10_Pathway_Stability_Determination	NA	NA	NCI_p53_Pathway_(proteasomal_ubiquitin_dependent_protein_catabolic_process)	NA	NA	NA	NA	NA	NA	NA	NA	NA	NA
NCI_Ephrin_B_reverse_signaling_Pathway_(endothelial_cell_proliferation)	IL-2_Pathway_Apoptosis_Inhibition	NA	NA	NCI_PLK3_signaling_events_Main_Pathway	NA	NA	NA	NA	NA	NA	NA	NA	NA	NA
NCI_ErbB4_signaling_events_Pathway_(apoptosis)	IL-6_Pathway	NA	NA	NCI_Signaling_events_mediated_by_HDAC_Class_III_Pathway_(regulation_of_S_phase_of_mitotic_cell_cycle)	NA	NA	NA	NA	NA	NA	NA	NA	NA	NA
NCI_ErbB4_signaling_events_Pathway_(axon_guidance)	ILK_Signaling_Pathway	NA	NA	NCI_Signaling_events_mediated_by_Stem_cell_factor_receptor_c_Kit__Pathway_(actin_filament_polymerization)	NA	NA	NA	NA	NA	NA	NA	NA	NA	NA
NCI_ErbB4_signaling_events_Pathway_(cell_proliferation)	ILK_Signaling_Pathway_Actin_Polymerization_Cytoskeletal_Reorganization	NA	NA	NCI_Signaling_events_mediated_by_Stem_cell_factor_receptor_c_Kit__Pathway_(cell_migration)	NA	NA	NA	NA	NA	NA	NA	NA	NA	NA
NCI_ErbB4_signaling_events_Pathway_(chemotaxis)	ILK_Signaling_Pathway_Cell_Migration_Retraction	NA	NA	NCI_Signaling_events_mediated_by_Stem_cell_factor_receptor_c_Kit__Pathway_(cell_motility)	NA	NA	NA	NA	NA	NA	NA	NA	NA	NA
NCI_ErbB4_signaling_events_Pathway_(dendrite_morphogenesis)	ILK_Signaling_Pathway_Cell_Motility	NA	NA	NCI_Signaling_events_mediated_by_Stem_cell_factor_receptor_c_Kit__Pathway_(positive_regulation_of_cell_proliferation)	NA	NA	NA	NA	NA	NA	NA	NA	NA	NA
NCI_ErbB4_signaling_events_Pathway_(epithelial_cell_differentiation)	ILK_Signaling_Pathway_Cytoskeletal_Adhesion_Complexes	NA	NA	NCI_Urokinase_type_plasminogen_activator_uPA_and_uPAR_mediated_signaling_Main_Pathway	NA	NA	NA	NA	NA	NA	NA	NA	NA	NA
NCI_ErbB4_signaling_events_Pathway_(heart_development)	ILK_Signaling_Pathway_Epithelial_Mesenchymal_Transition_Tubulo-Interstitial_Fibrosis	NA	NA	NCI_VEGF_and_VEGFR_signaling_network_Main_Pathway	NA	NA	NA	NA	NA	NA	NA	NA	NA	NA
NCI_ErbB4_signaling_events_Pathway_(neural_crest_cell_migration)	ILK_Signaling_Pathway_Induced_Cell_Proliferation	NA	NA	NCI_VEGFR1_specific_signals_Main_Pathway	NA	NA	NA	NA	NA	NA	NA	NA	NA	NA
NCI_FAS_CD95_signaling_Main_Pathway	ILK_Signaling_Pathway_Migration_Vasculogenesis	NA	NA	reactome_Acyl_chain_remodeling_of_DAG_and_TAG_Main_Pathway	NA	NA	NA	NA	NA	NA	NA	NA	NA	NA
NCI_FAS_CD95_signaling_Pathway_(neuron_projection_development)	ILK_Signaling_Pathway_Opsonization	NA	NA	reactome_Amino_acid_and_oligopeptide_SLC_transporters_Main_Pathway	NA	NA	NA	NA	NA	NA	NA	NA	NA	NA
NCI_Glypican_1_network_Main_Pathway	IP3_Pathway	NA	NA	reactome_Antigen_Presentation_Folding_assembly_and_peptide_loading_of_class_I_MHC_Main_Pathway	NA	NA	NA	NA	NA	NA	NA	NA	NA	NA
NCI_Glypican_1_network_Pathway_(BMP_signaling_pathway)	JAK-STAT_Pathway_IFN-Inducible_Gene_Expression_via_STAT2_STAT1	NA	NA	reactome_Apoptotic_cleavage_of_cell_adhesion_proteins_Main_Pathway	NA	NA	NA	NA	NA	NA	NA	NA	NA	NA
NCI_Glypican_1_network_Pathway_(cell_growth)	KEGG_Adrenergic_signaling_in_cardiomyocytes_Main_Pathway	NA	NA	reactome_Arachidonate_production_from_DAG_Main_Pathway	NA	NA	NA	NA	NA	NA	NA	NA	NA	NA
NCI_Glypican_1_network_Pathway_(fibroblast_growth_factor_receptor_signaling_pathway)	KEGG_African_trypanosomiasis_Main_Pathway	NA	NA	reactome_Asymmetric_localization_of_PCP_proteins_Main_Pathway	NA	NA	NA	NA	NA	NA	NA	NA	NA	NA
NCI_HIV_1_Nef_Negative_effector_of_Fas_and_TNF_alpha_Pathway_(Pathway_degradation_of_CASP3_CASP7_CASP6)	KEGG_Allograft_rejection_Main_Pathway	NA	NA	reactome_Caspase_mediated_cleavage_of_cytoskeletal_proteins_Main_Pathway	NA	NA	NA	NA	NA	NA	NA	NA	NA	NA
NCI_p53_Main_Pathway	KEGG_Amino_sugar_and_nucleotide_sugar_metabolism_Main_Pathway	NA	NA	reactome_Clathrin_derived_vesicle_budding_Main_Pathway	NA	NA	NA	NA	NA	NA	NA	NA	NA	NA
NCI_p53_Pathway_(apoptosis)	KEGG_Amoebiasis_Main_Pathway	NA	NA	reactome_Cross_presentation_of_particulate_exogenous_antigens_phagosomes__Main_Pathway	NA	NA	NA	NA	NA	NA	NA	NA	NA	NA
NCI_p53_Pathway_(proteasomal_ubiquitin_dependent_protein_catabolic_process)	KEGG_Amyotrophic_lateral_sclerosis_ALS__Main_Pathway	NA	NA	reactome_Crosslinking_of_collagen_fibrils_Main_Pathway	NA	NA	NA	NA	NA	NA	NA	NA	NA	NA
NCI_PLK3_signaling_events_Main_Pathway	KEGG_Antigen_processing_and_presentation_Main_Pathway	NA	NA	reactome_Cyclin_D_associated_events_in_G1_Main_Pathway	NA	NA	NA	NA	NA	NA	NA	NA	NA	NA
NCI_Signaling_events_mediated_by_HDAC_Class_III_Pathway_(regulation_of_S_phase_of_mitotic_cell_cycle)	KEGG_Arrhythmogenic_right_ventricular_cardiomyopathy_ARVC__Main_Pathway	NA	NA	reactome_Dissolution_of_Fibrin_Clot_Main_Pathway	NA	NA	NA	NA	NA	NA	NA	NA	NA	NA
NCI_Signaling_events_mediated_by_Stem_cell_factor_receptor_c_Kit__Pathway_(actin_filament_polymerization)	KEGG_Butirosin_and_neomycin_biosynthesis_Main_Pathway	NA	NA	reactome_Elastic_fibre_formation_Main_Pathway	NA	NA	NA	NA	NA	NA	NA	NA	NA	NA
NCI_Signaling_events_mediated_by_Stem_cell_factor_receptor_c_Kit__Pathway_(cell_migration)	KEGG_Caffeine_metabolism_Main_Pathway	NA	NA	reactome_Endosomal_Vacuolar_Main_Pathway	NA	NA	NA	NA	NA	NA	NA	NA	NA	NA
NCI_Signaling_events_mediated_by_Stem_cell_factor_receptor_c_Kit__Pathway_(cell_motility)	KEGG_Cell_cycle_Main_Pathway	NA	NA	reactome_ER_Quality_Control_Compartment_ERQC__Main_Pathway	NA	NA	NA	NA	NA	NA	NA	NA	NA	NA
NCI_Signaling_events_mediated_by_Stem_cell_factor_receptor_c_Kit__Pathway_(positive_regulation_of_cell_proliferation)	KEGG_Circadian_rhythm_Main_Pathway	NA	NA	reactome_FasL_CD95L_signaling_Main_Pathway	NA	NA	NA	NA	NA	NA	NA	NA	NA	NA
NCI_Urokinase_type_plasminogen_activator_uPA_and_uPAR_mediated_signaling_Main_Pathway	KEGG_Collecting_duct_acid_secretion_Main_Pathway	NA	NA	reactome_Glycosphingolipid_metabolism_Main_Pathway	NA	NA	NA	NA	NA	NA	NA	NA	NA	NA
NCI_VEGF_and_VEGFR_signaling_network_Main_Pathway	KEGG_Complement_and_coagulation_cascades_Main_Pathway	NA	NA	reactome_Interconversion_of_polyamines_Main_Pathway	NA	NA	NA	NA	NA	NA	NA	NA	NA	NA
NCI_VEGFR1_specific_signals_Main_Pathway	KEGG_Dorso_ventral_axis_formation_Main_Pathway	NA	NA	reactome_Interleukin_6_signaling_Main_Pathway	NA	NA	NA	NA	NA	NA	NA	NA	NA	NA
reactome_Acyl_chain_remodeling_of_DAG_and_TAG_Main_Pathway	KEGG_ECM_receptor_interaction_Main_Pathway	NA	NA	reactome_IRS_activation_Main_Pathway	NA	NA	NA	NA	NA	NA	NA	NA	NA	NA
reactome_AKT_phosphorylates_targets_in_the_cytosol_Main_Pathway	KEGG_Endocrine_and_other_factor_regulated_calcium_reabsorption_Main_Pathway	NA	NA	reactome_L1CAM_interactions_Main_Pathway	NA	NA	NA	NA	NA	NA	NA	NA	NA	NA
reactome_Amino_acid_and_oligopeptide_SLC_transporters_Main_Pathway	KEGG_Endocytosis_Main_Pathway	NA	NA	reactome_Nectin_Necl_trans_heterodimerization_Main_Pathway	NA	NA	NA	NA	NA	NA	NA	NA	NA	NA
reactome_Antigen_Presentation_Folding_assembly_and_peptide_loading_of_class_I_MHC_Main_Pathway	KEGG_ErbB_signaling_Main_Pathway	NA	NA	reactome_Nicotinate_metabolism_Main_Pathway	NA	NA	NA	NA	NA	NA	NA	NA	NA	NA
reactome_Apoptotic_cleavage_of_cell_adhesion_proteins_Main_Pathway	KEGG_Fat_digestion_and_absorption_Main_Pathway	NA	NA	reactome_Organic_anion_transporters_Main_Pathway	NA	NA	NA	NA	NA	NA	NA	NA	NA	NA
reactome_Arachidonate_production_from_DAG_Main_Pathway	KEGG_Glycosaminoglycan_biosynthesis_chondroitin_sulfate_dermatan_sulfate_Main_Pathway	NA	NA	reactome_Organic_cation_transport_Main_Pathway	NA	NA	NA	NA	NA	NA	NA	NA	NA	NA
reactome_Asymmetric_localization_of_PCP_proteins_Main_Pathway	KEGG_Glycosaminoglycan_biosynthesis_heparan_sulfate_heparin_Main_Pathway	NA	NA	reactome_Oxidative_Stress_Induced_Senescence_Main_Pathway	NA	NA	NA	NA	NA	NA	NA	NA	NA	NA
reactome_Caspase_mediated_cleavage_of_cytoskeletal_proteins_Main_Pathway	KEGG_Glycosaminoglycan_degradation_Main_Pathway	NA	NA	reactome_Plasmalogen_biosynthesis_Main_Pathway	NA	NA	NA	NA	NA	NA	NA	NA	NA	NA
reactome_Clathrin_derived_vesicle_budding_Main_Pathway	KEGG_Glycosphingolipid_biosynthesis_ganglio_series_Main_Pathway	NA	NA	reactome_PLC_beta_mediated_events_Main_Pathway	NA	NA	NA	NA	NA	NA	NA	NA	NA	NA
reactome_Cross_presentation_of_particulate_exogenous_antigens_phagosomes__Main_Pathway	KEGG_Hepatitis_C_Main_Pathway	NA	NA	reactome_Regulation_by_c_FLIP_Main_Pathway	NA	NA	NA	NA	NA	NA	NA	NA	NA	NA
reactome_Crosslinking_of_collagen_fibrils_Main_Pathway	KEGG_HIF_1_signaling_Main_Pathway	NA	NA	reactome_Regulation_of_KIT_signaling_Main_Pathway	NA	NA	NA	NA	NA	NA	NA	NA	NA	NA
reactome_Cyclin_D_associated_events_in_G1_Main_Pathway	KEGG_Huntington_s_disease_Main_Pathway	NA	NA	reactome_RIG_I_MDA5_mediated_induction_of_IFN_alpha_beta_pathways_Main_Pathway	NA	NA	NA	NA	NA	NA	NA	NA	NA	NA
reactome_Dissolution_of_Fibrin_Clot_Main_Pathway	KEGG_Inflammatory_mediator_regulation_of_TRP_channels_Main_Pathway	NA	NA	reactome_RNA_Polymerase_I_Promoter_Opening_Main_Pathway	NA	NA	NA	NA	NA	NA	NA	NA	NA	NA
reactome_Elastic_fibre_formation_Main_Pathway	KEGG_Inositol_phosphate_metabolism_Main_Pathway	NA	NA	reactome_Signaling_by_ERBB4_Main_Pathway	NA	NA	NA	NA	NA	NA	NA	NA	NA	NA
reactome_Endosomal_Vacuolar_Main_Pathway	KEGG_Intestinal_immune_network_for_IgA_production_Main_Pathway	NA	NA	reactome_Stabilization_of_p53_Main_Pathway	NA	NA	NA	NA	NA	NA	NA	NA	NA	NA
reactome_ER_Quality_Control_Compartment_ERQC__Main_Pathway	KEGG_Legionellosis_Main_Pathway	NA	NA	reactome_Sulfide_oxidation_to_sulfate_Main_Pathway	NA	NA	NA	NA	NA	NA	NA	NA	NA	NA
reactome_FasL_CD95L_signaling_Main_Pathway	KEGG_Leishmaniasis_Main_Pathway	NA	NA	reactome_Synthesis_of_UDP_N_acetyl_glucosamine_Main_Pathway	NA	NA	NA	NA	NA	NA	NA	NA	NA	NA
reactome_Glycosphingolipid_metabolism_Main_Pathway	KEGG_Linoleic_acid_metabolism_Main_Pathway	NA	NA	reactome_The_activation_of_arylsulfatases_Main_Pathway	NA	NA	NA	NA	NA	NA	NA	NA	NA	NA
reactome_Inflammasomes_Main_Pathway	KEGG_Lysosome_Main_Pathway	NA	NA	reactome_The_NLRP1_inflammasome_Main_Pathway	NA	NA	NA	NA	NA	NA	NA	NA	NA	NA
reactome_Interconversion_of_polyamines_Main_Pathway	KEGG_Malaria_Main_Pathway	NA	NA	reactome_Toxicity_of_botulinum_toxin_type_B_BoNT_B__Main_Pathway	NA	NA	NA	NA	NA	NA	NA	NA	NA	NA
reactome_Interleukin_1_processing_Main_Pathway	KEGG_Maturity_onset_diabetes_of_the_young_Main_Pathway	NA	NA	reactome_Toxicity_of_botulinum_toxin_type_G_BoNT_G__Main_Pathway	NA	NA	NA	NA	NA	NA	NA	NA	NA	NA
reactome_Interleukin_1_signaling_Main_Pathway	KEGG_Melanogenesis_Main_Pathway	NA	NA	reactome_TRAIL_signaling_Main_Pathway	NA	NA	NA	NA	NA	NA	NA	NA	NA	NA
reactome_Interleukin_6_signaling_Main_Pathway	KEGG_MicroRNAs_in_cancer_Main_Pathway	NA	NA	reactome_Transport_and_synthesis_of_PAPS_Main_Pathway	NA	NA	NA	NA	NA	NA	NA	NA	NA	NA
reactome_IRS_activation_Main_Pathway	KEGG_Mineral_absorption_Main_Pathway	NA	NA	reactome_Transport_of_inorganic_cations_anions_and_amino_acids_oligopeptides_Main_Pathway	NA	NA	NA	NA	NA	NA	NA	NA	NA	NA
reactome_L1CAM_interactions_Main_Pathway	KEGG_Nicotinate_and_nicotinamide_metabolism_Main_Pathway	NA	NA	reactome_VEGF_binds_to_VEGFR_leading_to_receptor_dimerization_Main_Pathway	NA	NA	NA	NA	NA	NA	NA	NA	NA	NA
reactome_MyD88_dependent_cascade_initiated_on_endosome_Main_Pathway	KEGG_Notch_signaling_Main_Pathway	NA	NA	NA	NA	NA	NA	NA	NA	NA	NA	NA	NA	NA
reactome_Nectin_Necl_trans_heterodimerization_Main_Pathway	KEGG_Other_glycan_degradation_Main_Pathway	NA	NA	NA	NA	NA	NA	NA	NA	NA	NA	NA	NA	NA
reactome_Nicotinate_metabolism_Main_Pathway	KEGG_Other_types_of_O_glycan_biosynthesis_Main_Pathway	NA	NA	NA	NA	NA	NA	NA	NA	NA	NA	NA	NA	NA
reactome_Organic_anion_transporters_Main_Pathway	KEGG_Oxytocin_signaling_Main_Pathway	NA	NA	NA	NA	NA	NA	NA	NA	NA	NA	NA	NA	NA
reactome_Organic_cation_transport_Main_Pathway	KEGG_p53_signaling_Main_Pathway	NA	NA	NA	NA	NA	NA	NA	NA	NA	NA	NA	NA	NA
reactome_Oxidative_Stress_Induced_Senescence_Main_Pathway	KEGG_Pancreatic_secretion_Main_Pathway	NA	NA	NA	NA	NA	NA	NA	NA	NA	NA	NA	NA	NA
reactome_p53_Dependent_G1_DNA_Damage_Response_Main_Pathway	KEGG_Pathways_in_cancer_Main_Pathway	NA	NA	NA	NA	NA	NA	NA	NA	NA	NA	NA	NA	NA
reactome_PCP_CE_Main_Pathway	KEGG_Pertussis_Main_Pathway	NA	NA	NA	NA	NA	NA	NA	NA	NA	NA	NA	NA	NA
reactome_Plasmalogen_biosynthesis_Main_Pathway	KEGG_Phosphatidylinositol_signaling_system_Main_Pathway	NA	NA	NA	NA	NA	NA	NA	NA	NA	NA	NA	NA	NA
reactome_PLC_beta_mediated_events_Main_Pathway	KEGG_PI3K_Akt_signaling_Main_Pathway	NA	NA	NA	NA	NA	NA	NA	NA	NA	NA	NA	NA	NA
reactome_Prostanoid_ligand_receptors_Main_Pathway	KEGG_Prion_diseases_Main_Pathway	NA	NA	NA	NA	NA	NA	NA	NA	NA	NA	NA	NA	NA
reactome_Regulation_by_c_FLIP_Main_Pathway	KEGG_Prolactin_signaling_Main_Pathway	NA	NA	NA	NA	NA	NA	NA	NA	NA	NA	NA	NA	NA
reactome_Regulation_of_KIT_signaling_Main_Pathway	KEGG_Rap1_signaling_Main_Pathway	NA	NA	NA	NA	NA	NA	NA	NA	NA	NA	NA	NA	NA
reactome_RIG_I_MDA5_mediated_induction_of_IFN_alpha_beta_pathways_Main_Pathway	KEGG_Renin_angiotensin_system_Main_Pathway	NA	NA	NA	NA	NA	NA	NA	NA	NA	NA	NA	NA	NA
reactome_RNA_Polymerase_I_Promoter_Opening_Main_Pathway	KEGG_Riboflavin_metabolism_Main_Pathway	NA	NA	NA	NA	NA	NA	NA	NA	NA	NA	NA	NA	NA
reactome_Role_of_Abl_in_Robo_Slit_signaling_Main_Pathway	KEGG_Small_cell_lung_cancer_Main_Pathway	NA	NA	NA	NA	NA	NA	NA	NA	NA	NA	NA	NA	NA
reactome_SHC_activation_Main_Pathway	KEGG_Sphingolipid_metabolism_Main_Pathway	NA	NA	NA	NA	NA	NA	NA	NA	NA	NA	NA	NA	NA
reactome_Signaling_by_ERBB4_Main_Pathway	KEGG_Staphylococcus_aureus_infection_Main_Pathway	NA	NA	NA	NA	NA	NA	NA	NA	NA	NA	NA	NA	NA
reactome_Stabilization_of_p53_Main_Pathway	KEGG_Starch_and_sucrose_metabolism_Main_Pathway	NA	NA	NA	NA	NA	NA	NA	NA	NA	NA	NA	NA	NA
reactome_Sulfide_oxidation_to_sulfate_Main_Pathway	KEGG_Steroid_biosynthesis_Main_Pathway	NA	NA	NA	NA	NA	NA	NA	NA	NA	NA	NA	NA	NA
reactome_Synthesis_of_UDP_N_acetyl_glucosamine_Main_Pathway	KEGG_Steroid_hormone_biosynthesis_Main_Pathway	NA	NA	NA	NA	NA	NA	NA	NA	NA	NA	NA	NA	NA
reactome_The_activation_of_arylsulfatases_Main_Pathway	KEGG_Sulfur_metabolism_Main_Pathway	NA	NA	NA	NA	NA	NA	NA	NA	NA	NA	NA	NA	NA
reactome_The_NLRP1_inflammasome_Main_Pathway	KEGG_Synaptic_vesicle_cycle_Main_Pathway	NA	NA	NA	NA	NA	NA	NA	NA	NA	NA	NA	NA	NA
reactome_Toxicity_of_botulinum_toxin_type_B_BoNT_B__Main_Pathway	KEGG_Systemic_lupus_erythematosus_Main_Pathway	NA	NA	NA	NA	NA	NA	NA	NA	NA	NA	NA	NA	NA
reactome_Toxicity_of_botulinum_toxin_type_G_BoNT_G__Main_Pathway	KEGG_Thyroid_hormone_synthesis_Main_Pathway	NA	NA	NA	NA	NA	NA	NA	NA	NA	NA	NA	NA	NA
reactome_TRAIL_signaling_Main_Pathway	KEGG_Type_I_diabetes_mellitus_Main_Pathway	NA	NA	NA	NA	NA	NA	NA	NA	NA	NA	NA	NA	NA
reactome_Transport_and_synthesis_of_PAPS_Main_Pathway	KEGG_Wnt_signaling_Main_Pathway	NA	NA	NA	NA	NA	NA	NA	NA	NA	NA	NA	NA	NA
reactome_Transport_of_inorganic_cations_anions_and_amino_acids_oligopeptides_Main_Pathway	MAPK_Signaling_Pathway	NA	NA	NA	NA	NA	NA	NA	NA	NA	NA	NA	NA	NA
reactome_VEGF_binds_to_VEGFR_leading_to_receptor_dimerization_Main_Pathway	MAPK_Signaling_Pathway_Cell_Motility_Inflammation_Apoptosis_Osmoregulation	NA	NA	NA	NA	NA	NA	NA	NA	NA	NA	NA	NA	NA
TRAF_Pathway_Direct_Antimicrobial_Response_and_Cell-Mediated_Immunity_and_Apoptosis_of_Host_Cell	MAPK_Signaling_Pathway_Gene_Expression_Cell_Proliferation_Cell_Survival_Tumorigenesis_Differentiation_Development_via_PXN_CREB3_RPS6KA5_RPS6KA6	NA	NA	NA	NA	NA	NA	NA	NA	NA	NA	NA	NA	NA
NA	Mitochondrial_Apoptosis_Pathway_Apoptosis	NA	NA	NA	NA	NA	NA	NA	NA	NA	NA	NA	NA	NA
NA	Mitochondrial_Apoptosis_Pathway_DNA_Fragmentation	NA	NA	NA	NA	NA	NA	NA	NA	NA	NA	NA	NA	NA
NA	mTOR_Pathway	NA	NA	NA	NA	NA	NA	NA	NA	NA	NA	NA	NA	NA
NA	mTOR_Pathway_Lipid_Synthesis	NA	NA	NA	NA	NA	NA	NA	NA	NA	NA	NA	NA	NA
NA	NCI_ALK1_signaling_events_Main_Pathway	NA	NA	NA	NA	NA	NA	NA	NA	NA	NA	NA	NA	NA
NA	NCI_ALK1_signaling_events_Pathway_(endothelial_cell_migration)	NA	NA	NA	NA	NA	NA	NA	NA	NA	NA	NA	NA	NA
NA	NCI_ALK1_signaling_events_Pathway_(endothelial_cell_proliferation)	NA	NA	NA	NA	NA	NA	NA	NA	NA	NA	NA	NA	NA
NA	NCI_ALK1_signaling_events_Pathway_(sprouting_angiogenesis)	NA	NA	NA	NA	NA	NA	NA	NA	NA	NA	NA	NA	NA
NA	NCI_Alpha_synuclein_signaling_Pathway_(neuron_apoptosis)	NA	NA	NA	NA	NA	NA	NA	NA	NA	NA	NA	NA	NA
NA	NCI_Alpha6_beta4_integrin_ligand_interactions_Main_Pathway	NA	NA	NA	NA	NA	NA	NA	NA	NA	NA	NA	NA	NA
NA	NCI_AlphaE_beta7_integrin_cell_surface_interactions_Main_Pathway	NA	NA	NA	NA	NA	NA	NA	NA	NA	NA	NA	NA	NA
NA	NCI_amb2_Integrin_signaling_Main_Pathway	NA	NA	NA	NA	NA	NA	NA	NA	NA	NA	NA	NA	NA
NA	NCI_Angiopoietin_receptor_Tie2_mediated_signaling_Main_Pathway	NA	NA	NA	NA	NA	NA	NA	NA	NA	NA	NA	NA	NA
NA	NCI_Angiopoietin_receptor_Tie2_mediated_signaling_Pathway_(chemokinesis)	NA	NA	NA	NA	NA	NA	NA	NA	NA	NA	NA	NA	NA
NA	NCI_Angiopoietin_receptor_Tie2_mediated_signaling_Pathway_(negative_regulation_of_caspase_activity)	NA	NA	NA	NA	NA	NA	NA	NA	NA	NA	NA	NA	NA
NA	NCI_Arf6_downstream_Pathway_(cortical_actin_cytoskeleton_organization)	NA	NA	NA	NA	NA	NA	NA	NA	NA	NA	NA	NA	NA
NA	NCI_Arf6_downstream_Pathway_(lamellipodium_assembly)	NA	NA	NA	NA	NA	NA	NA	NA	NA	NA	NA	NA	NA
NA	NCI_Arf6_trafficking_events_Pathway_(calcium_ion_dependent_exocytosis)	NA	NA	NA	NA	NA	NA	NA	NA	NA	NA	NA	NA	NA
NA	NCI_Arf6_trafficking_events_Pathway_(endocytosis)	NA	NA	NA	NA	NA	NA	NA	NA	NA	NA	NA	NA	NA
NA	NCI_Arf6_trafficking_events_Pathway_(regulation_of_calcium_dependent_cell_cell_adhesion)	NA	NA	NA	NA	NA	NA	NA	NA	NA	NA	NA	NA	NA
NA	NCI_Beta1_integrin_cell_surface_interactions_Main_Pathway	NA	NA	NA	NA	NA	NA	NA	NA	NA	NA	NA	NA	NA
NA	NCI_Beta2_integrin_cell_surface_interactions_Main_Pathway	NA	NA	NA	NA	NA	NA	NA	NA	NA	NA	NA	NA	NA
NA	NCI_Beta3_integrin_cell_surface_interactions_Main_Pathway	NA	NA	NA	NA	NA	NA	NA	NA	NA	NA	NA	NA	NA
NA	NCI_Beta5_beta6_beta7_and_beta8_integrin_cell_surface_interactions_Main_Pathway	NA	NA	NA	NA	NA	NA	NA	NA	NA	NA	NA	NA	NA
NA	NCI_Caspase_Cascade_in_Apoptosis_Main_Pathway	NA	NA	NA	NA	NA	NA	NA	NA	NA	NA	NA	NA	NA
NA	NCI_Caspase_Cascade_in_Apoptosis_Pathway_(apoptotic_nuclear_changes)	NA	NA	NA	NA	NA	NA	NA	NA	NA	NA	NA	NA	NA
NA	NCI_CD40_CD40L_signaling_Pathway_(B_cell_affinity_maturation)	NA	NA	NA	NA	NA	NA	NA	NA	NA	NA	NA	NA	NA
NA	NCI_CD40_CD40L_signaling_Pathway_(plasma_cell_differentiation)	NA	NA	NA	NA	NA	NA	NA	NA	NA	NA	NA	NA	NA
NA	NCI_CDC42_signaling_events_Pathway_(cell_motility)	NA	NA	NA	NA	NA	NA	NA	NA	NA	NA	NA	NA	NA
NA	NCI_CDC42_signaling_events_Pathway_(cell_proliferation)	NA	NA	NA	NA	NA	NA	NA	NA	NA	NA	NA	NA	NA
NA	NCI_CDC42_signaling_events_Pathway_(cytokinesis)	NA	NA	NA	NA	NA	NA	NA	NA	NA	NA	NA	NA	NA
NA	NCI_CDC42_signaling_events_Pathway_(establishment_of_cell_polarity)	NA	NA	NA	NA	NA	NA	NA	NA	NA	NA	NA	NA	NA
NA	NCI_CDC42_signaling_events_Pathway_(Pathway_positive_regulation_of_NF_kappaB_transcription_factor_activity_via_CDC42)	NA	NA	NA	NA	NA	NA	NA	NA	NA	NA	NA	NA	NA
NA	NCI_Cellular_roles_of_Anthrax_toxin_Main_Pathway	NA	NA	NA	NA	NA	NA	NA	NA	NA	NA	NA	NA	NA
NA	NCI_Cellular_roles_of_Anthrax_toxin_Pathway_(apoptosis)	NA	NA	NA	NA	NA	NA	NA	NA	NA	NA	NA	NA	NA
NA	NCI_Cellular_roles_of_Anthrax_toxin_Pathway_(inflammatory_response)	NA	NA	NA	NA	NA	NA	NA	NA	NA	NA	NA	NA	NA
NA	NCI_Cellular_roles_of_Anthrax_toxin_Pathway_(macrophage_activation)	NA	NA	NA	NA	NA	NA	NA	NA	NA	NA	NA	NA	NA
NA	NCI_Cellular_roles_of_Anthrax_toxin_Pathway_(MAPKKK_cascade)	NA	NA	NA	NA	NA	NA	NA	NA	NA	NA	NA	NA	NA
NA	NCI_Cellular_roles_of_Anthrax_toxin_Pathway_(monocyte_activation)	NA	NA	NA	NA	NA	NA	NA	NA	NA	NA	NA	NA	NA
NA	NCI_Cellular_roles_of_Anthrax_toxin_Pathway_(necrosis)	NA	NA	NA	NA	NA	NA	NA	NA	NA	NA	NA	NA	NA
NA	NCI_Cellular_roles_of_Anthrax_toxin_Pathway_(negative_regulation_of_macrophage_activation)	NA	NA	NA	NA	NA	NA	NA	NA	NA	NA	NA	NA	NA
NA	NCI_Cellular_roles_of_Anthrax_toxin_Pathway_(negative_regulation_of_myeloid_dendritic_cell_antigen_processing_and_presentation)	NA	NA	NA	NA	NA	NA	NA	NA	NA	NA	NA	NA	NA
NA	NCI_Cellular_roles_of_Anthrax_toxin_Pathway_(negative_regulation_of_phagocytosis)	NA	NA	NA	NA	NA	NA	NA	NA	NA	NA	NA	NA	NA
NA	NCI_Cellular_roles_of_Anthrax_toxin_Pathway_(platelet_activation)	NA	NA	NA	NA	NA	NA	NA	NA	NA	NA	NA	NA	NA
NA	NCI_Cellular_roles_of_Anthrax_toxin_Pathway_(regulation_of_endothelial_cell_proliferation)	NA	NA	NA	NA	NA	NA	NA	NA	NA	NA	NA	NA	NA
NA	NCI_Class_I_PI3K_signaling_events_mediated_by_Akt_Main_Pathway	NA	NA	NA	NA	NA	NA	NA	NA	NA	NA	NA	NA	NA
NA	NCI_Class_I_PI3K_signaling_events_mediated_by_Akt_Pathway_(negative_regulation_of_cell_cycle)	NA	NA	NA	NA	NA	NA	NA	NA	NA	NA	NA	NA	NA
NA	NCI_Class_I_PI3K_signaling_events_Pathway_(cell_survival)	NA	NA	NA	NA	NA	NA	NA	NA	NA	NA	NA	NA	NA
NA	NCI_Coregulation_of_Androgen_receptor_activity_Main_Pathway	NA	NA	NA	NA	NA	NA	NA	NA	NA	NA	NA	NA	NA
NA	NCI_Coregulation_of_Androgen_receptor_activity_Pathway_(cell_proliferation)	NA	NA	NA	NA	NA	NA	NA	NA	NA	NA	NA	NA	NA
NA	NCI_CXCR3_mediated_signaling_events_Pathway_(cAMP_biosynthetic_process)	NA	NA	NA	NA	NA	NA	NA	NA	NA	NA	NA	NA	NA
NA	NCI_CXCR3_mediated_signaling_events_Pathway_(regulation_of_stress_fiber_assembly)	NA	NA	NA	NA	NA	NA	NA	NA	NA	NA	NA	NA	NA
NA	NCI_E_cadherin_signaling_in_keratinocytes_Main_Pathway	NA	NA	NA	NA	NA	NA	NA	NA	NA	NA	NA	NA	NA
NA	NCI_E_cadherin_signaling_in_keratinocytes_Pathway_(actin_cable_formation)	NA	NA	NA	NA	NA	NA	NA	NA	NA	NA	NA	NA	NA
NA	NCI_E_cadherin_signaling_in_keratinocytes_Pathway_(adherens_junction_organization)	NA	NA	NA	NA	NA	NA	NA	NA	NA	NA	NA	NA	NA
NA	NCI_E_cadherin_signaling_in_keratinocytes_Pathway_(apoptosis)	NA	NA	NA	NA	NA	NA	NA	NA	NA	NA	NA	NA	NA
NA	NCI_E_cadherin_signaling_in_keratinocytes_Pathway_(establishment_of_polarity_of_embryonic_epithelium)	NA	NA	NA	NA	NA	NA	NA	NA	NA	NA	NA	NA	NA
NA	NCI_E_cadherin_signaling_in_keratinocytes_Pathway_(keratinocyte_differentiation)	NA	NA	NA	NA	NA	NA	NA	NA	NA	NA	NA	NA	NA
NA	NCI_E_cadherin_signaling_in_the_nascent_adherens_junction_Main_Pathway	NA	NA	NA	NA	NA	NA	NA	NA	NA	NA	NA	NA	NA
NA	NCI_E_cadherin_signaling_in_the_nascent_adherens_junction_Pathway_(regulation_of_actin_nucleation)	NA	NA	NA	NA	NA	NA	NA	NA	NA	NA	NA	NA	NA
NA	NCI_E2F_transcription_factor_network_Main_Pathway	NA	NA	NA	NA	NA	NA	NA	NA	NA	NA	NA	NA	NA
NA	NCI_Effects_of_Botulinum_toxin_Main_Pathway	NA	NA	NA	NA	NA	NA	NA	NA	NA	NA	NA	NA	NA
NA	NCI_EGFR_dependent_Endothelin_signaling_events_Main_Pathway	NA	NA	NA	NA	NA	NA	NA	NA	NA	NA	NA	NA	NA
NA	NCI_Endogenous_TLR_signaling_Main_Pathway	NA	NA	NA	NA	NA	NA	NA	NA	NA	NA	NA	NA	NA
NA	NCI_Endogenous_TLR_signaling_Pathway_(cell_migration)	NA	NA	NA	NA	NA	NA	NA	NA	NA	NA	NA	NA	NA
NA	NCI_Endogenous_TLR_signaling_Pathway_(regulation_of_apoptosis)	NA	NA	NA	NA	NA	NA	NA	NA	NA	NA	NA	NA	NA
NA	NCI_Endogenous_TLR_signaling_Pathway_(regulation_of_cell_matrix_adhesion)	NA	NA	NA	NA	NA	NA	NA	NA	NA	NA	NA	NA	NA
NA	NCI_Endogenous_TLR_signaling_Pathway_(regulation_of_cell_proliferation)	NA	NA	NA	NA	NA	NA	NA	NA	NA	NA	NA	NA	NA
NA	NCI_Endogenous_TLR_signaling_Pathway_(regulation_of_interleukin_1_beta_production)	NA	NA	NA	NA	NA	NA	NA	NA	NA	NA	NA	NA	NA
NA	NCI_Endogenous_TLR_signaling_Pathway_(respiratory_burst_involved_in_inflammatory_response)	NA	NA	NA	NA	NA	NA	NA	NA	NA	NA	NA	NA	NA
NA	NCI_Endothelins_Main_Pathway	NA	NA	NA	NA	NA	NA	NA	NA	NA	NA	NA	NA	NA
NA	NCI_Endothelins_Pathway_(cAMP_biosynthetic_process)	NA	NA	NA	NA	NA	NA	NA	NA	NA	NA	NA	NA	NA
NA	NCI_Endothelins_Pathway_(positive_regulation_of_muscle_contraction)	NA	NA	NA	NA	NA	NA	NA	NA	NA	NA	NA	NA	NA
NA	NCI_EPHA_forward_signaling_Pathway_(proteasomal_ubiquitin_dependent_protein_catabolic_process)	NA	NA	NA	NA	NA	NA	NA	NA	NA	NA	NA	NA	NA
NA	NCI_EPHA2_forward_signaling_Main_Pathway	NA	NA	NA	NA	NA	NA	NA	NA	NA	NA	NA	NA	NA
NA	NCI_Ephrin_A_reverse_signaling_Main_Pathway	NA	NA	NA	NA	NA	NA	NA	NA	NA	NA	NA	NA	NA
NA	NCI_Ephrin_A_reverse_signaling_Pathway_(beta_integrin_mediated_adhesion)	NA	NA	NA	NA	NA	NA	NA	NA	NA	NA	NA	NA	NA
NA	NCI_Ephrin_A_reverse_signaling_Pathway_(MAPKKK_cascade)	NA	NA	NA	NA	NA	NA	NA	NA	NA	NA	NA	NA	NA
NA	NCI_Ephrin_A_reverse_signaling_Pathway_(neuron_projection_morphogenesis)	NA	NA	NA	NA	NA	NA	NA	NA	NA	NA	NA	NA	NA
NA	NCI_EPO_signaling_Pathway_(cell_proliferation)	NA	NA	NA	NA	NA	NA	NA	NA	NA	NA	NA	NA	NA
NA	NCI_ErbB_receptor_signaling_network_Main_Pathway	NA	NA	NA	NA	NA	NA	NA	NA	NA	NA	NA	NA	NA
NA	NCI_ErbB1_downstream_signaling_Pathway_(cytoskeleton_organization)	NA	NA	NA	NA	NA	NA	NA	NA	NA	NA	NA	NA	NA
NA	NCI_ErbB4_signaling_events_Main_Pathway	NA	NA	NA	NA	NA	NA	NA	NA	NA	NA	NA	NA	NA
NA	NCI_ErbB4_signaling_events_Pathway_(apoptosis)	NA	NA	NA	NA	NA	NA	NA	NA	NA	NA	NA	NA	NA
NA	NCI_ErbB4_signaling_events_Pathway_(axon_guidance)	NA	NA	NA	NA	NA	NA	NA	NA	NA	NA	NA	NA	NA
NA	NCI_ErbB4_signaling_events_Pathway_(cell_proliferation)	NA	NA	NA	NA	NA	NA	NA	NA	NA	NA	NA	NA	NA
NA	NCI_ErbB4_signaling_events_Pathway_(chemotaxis)	NA	NA	NA	NA	NA	NA	NA	NA	NA	NA	NA	NA	NA
NA	NCI_ErbB4_signaling_events_Pathway_(dendrite_morphogenesis)	NA	NA	NA	NA	NA	NA	NA	NA	NA	NA	NA	NA	NA
NA	NCI_ErbB4_signaling_events_Pathway_(epithelial_cell_differentiation)	NA	NA	NA	NA	NA	NA	NA	NA	NA	NA	NA	NA	NA
NA	NCI_ErbB4_signaling_events_Pathway_(glial_cell_differentiation)	NA	NA	NA	NA	NA	NA	NA	NA	NA	NA	NA	NA	NA
NA	NCI_ErbB4_signaling_events_Pathway_(heart_development)	NA	NA	NA	NA	NA	NA	NA	NA	NA	NA	NA	NA	NA
NA	NCI_ErbB4_signaling_events_Pathway_(neural_crest_cell_migration)	NA	NA	NA	NA	NA	NA	NA	NA	NA	NA	NA	NA	NA
NA	NCI_FAS_CD95_signaling_Main_Pathway	NA	NA	NA	NA	NA	NA	NA	NA	NA	NA	NA	NA	NA
NA	NCI_FAS_CD95_signaling_Pathway_(necroptosis)	NA	NA	NA	NA	NA	NA	NA	NA	NA	NA	NA	NA	NA
NA	NCI_FAS_CD95_signaling_Pathway_(neuron_projection_development)	NA	NA	NA	NA	NA	NA	NA	NA	NA	NA	NA	NA	NA
NA	NCI_Glypican_1_network_Main_Pathway	NA	NA	NA	NA	NA	NA	NA	NA	NA	NA	NA	NA	NA
NA	NCI_Glypican_1_network_Pathway_(BMP_signaling_pathway)	NA	NA	NA	NA	NA	NA	NA	NA	NA	NA	NA	NA	NA
NA	NCI_Glypican_1_network_Pathway_(cell_growth)	NA	NA	NA	NA	NA	NA	NA	NA	NA	NA	NA	NA	NA
NA	NCI_Glypican_1_network_Pathway_(fibroblast_growth_factor_receptor_signaling_pathway)	NA	NA	NA	NA	NA	NA	NA	NA	NA	NA	NA	NA	NA
NA	NCI_IFN_gamma_Main_Pathway	NA	NA	NA	NA	NA	NA	NA	NA	NA	NA	NA	NA	NA
NA	NCI_IFN_gamma_Pathway_(Antibacterial_Response)	NA	NA	NA	NA	NA	NA	NA	NA	NA	NA	NA	NA	NA
NA	NCI_IFN_gamma_Pathway_(antigen_processing_and_presentation_of_peptide_antigen_via_MHC_class_I)	NA	NA	NA	NA	NA	NA	NA	NA	NA	NA	NA	NA	NA
NA	NCI_IFN_gamma_Pathway_(antigen_processing_and_presentation_of_peptide_antigen_via_MHC_class_II)	NA	NA	NA	NA	NA	NA	NA	NA	NA	NA	NA	NA	NA
NA	NCI_IFN_gamma_Pathway_(Antiviral_Response)	NA	NA	NA	NA	NA	NA	NA	NA	NA	NA	NA	NA	NA
NA	NCI_IFN_gamma_Pathway_(apoptosis)	NA	NA	NA	NA	NA	NA	NA	NA	NA	NA	NA	NA	NA
NA	NCI_IFN_gamma_Pathway_(Immunoregulation)	NA	NA	NA	NA	NA	NA	NA	NA	NA	NA	NA	NA	NA
NA	NCI_IFN_gamma_Pathway_(negative_regulation_of_cell_growth)	NA	NA	NA	NA	NA	NA	NA	NA	NA	NA	NA	NA	NA
NA	NCI_IGF1_Pathway_(positive_regulation_of_MAPKKK_cascade)	NA	NA	NA	NA	NA	NA	NA	NA	NA	NA	NA	NA	NA
NA	NCI_IL12_signaling_mediated_by_STAT4_Main_Pathway	NA	NA	NA	NA	NA	NA	NA	NA	NA	NA	NA	NA	NA
NA	NCI_IL12_signaling_mediated_by_STAT4_Pathway_(natural_killer_cell_mediated_cytotoxicity)	NA	NA	NA	NA	NA	NA	NA	NA	NA	NA	NA	NA	NA
NA	NCI_IL12_signaling_mediated_by_STAT4_Pathway_(T_helper_1_cell_differentiation)	NA	NA	NA	NA	NA	NA	NA	NA	NA	NA	NA	NA	NA
NA	NCI_IL12_signaling_mediated_by_STAT4_Pathway_(T_helper_2_cell_differentiation)	NA	NA	NA	NA	NA	NA	NA	NA	NA	NA	NA	NA	NA
NA	NCI_IL27_mediated_signaling_events_Main_Pathway	NA	NA	NA	NA	NA	NA	NA	NA	NA	NA	NA	NA	NA
NA	NCI_IL27_mediated_signaling_events_Pathway_(cytokine_production_during_immune_response)	NA	NA	NA	NA	NA	NA	NA	NA	NA	NA	NA	NA	NA
NA	NCI_IL27_mediated_signaling_events_Pathway_(MAPKKK_cascade)	NA	NA	NA	NA	NA	NA	NA	NA	NA	NA	NA	NA	NA
NA	NCI_IL27_mediated_signaling_events_Pathway_(mast_cell_activation)	NA	NA	NA	NA	NA	NA	NA	NA	NA	NA	NA	NA	NA
NA	NCI_IL27_mediated_signaling_events_Pathway_(positive_regulation_of_mast_cell_cytokine_production)	NA	NA	NA	NA	NA	NA	NA	NA	NA	NA	NA	NA	NA
NA	NCI_IL27_mediated_signaling_events_Pathway_(positive_regulation_of_T_cell_mediated_cytotoxicity)	NA	NA	NA	NA	NA	NA	NA	NA	NA	NA	NA	NA	NA
NA	NCI_IL27_mediated_signaling_events_Pathway_(T_cell_proliferation)	NA	NA	NA	NA	NA	NA	NA	NA	NA	NA	NA	NA	NA
NA	NCI_IL27_mediated_signaling_events_Pathway_(T_cell_proliferation_during_immune_response)	NA	NA	NA	NA	NA	NA	NA	NA	NA	NA	NA	NA	NA
NA	NCI_IL27_mediated_signaling_events_Pathway_(T_helper_2_cell_differentiation)	NA	NA	NA	NA	NA	NA	NA	NA	NA	NA	NA	NA	NA
NA	NCI_IL5_mediated_signaling_events_Main_Pathway	NA	NA	NA	NA	NA	NA	NA	NA	NA	NA	NA	NA	NA
NA	NCI_IL5_mediated_signaling_events_Pathway_(proteasomal_ubiquitin_dependent_protein_catabolic_process)	NA	NA	NA	NA	NA	NA	NA	NA	NA	NA	NA	NA	NA
NA	NCI_IL5_mediated_signaling_events_Pathway_(regulation_of_isotype_switching_to_IgG_isotypes)	NA	NA	NA	NA	NA	NA	NA	NA	NA	NA	NA	NA	NA
NA	NCI_IL6_mediated_signaling_events_Pathway_(cell_cycle_arrest)	NA	NA	NA	NA	NA	NA	NA	NA	NA	NA	NA	NA	NA
NA	NCI_IL6_mediated_signaling_events_Pathway_(cell_survival)	NA	NA	NA	NA	NA	NA	NA	NA	NA	NA	NA	NA	NA
NA	NCI_IL6_mediated_signaling_events_Pathway_(macrophage_differentiation)	NA	NA	NA	NA	NA	NA	NA	NA	NA	NA	NA	NA	NA
NA	NCI_Insulin_mediated_glucose_transport_Main_Pathway	NA	NA	NA	NA	NA	NA	NA	NA	NA	NA	NA	NA	NA
NA	NCI_Insulin_Pathway_Pathway_(negative_regulation_of_MAPKKK_cascade)	NA	NA	NA	NA	NA	NA	NA	NA	NA	NA	NA	NA	NA
NA	NCI_Integrin_linked_kinase_signaling_Main_Pathway	NA	NA	NA	NA	NA	NA	NA	NA	NA	NA	NA	NA	NA
NA	NCI_Integrins_in_angiogenesis_Main_Pathway	NA	NA	NA	NA	NA	NA	NA	NA	NA	NA	NA	NA	NA
NA	NCI_Integrins_in_angiogenesis_Pathway_(angiogenesis)	NA	NA	NA	NA	NA	NA	NA	NA	NA	NA	NA	NA	NA
NA	NCI_Internalization_of_ErbB1_Main_Pathway	NA	NA	NA	NA	NA	NA	NA	NA	NA	NA	NA	NA	NA
NA	NCI_Lissencephaly_gene_LIS1_in_neuronal_migration_and_development_Pathway_(microtubule_based_movement)	NA	NA	NA	NA	NA	NA	NA	NA	NA	NA	NA	NA	NA
NA	NCI_N_cadherin_signaling_events_Main_Pathway	NA	NA	NA	NA	NA	NA	NA	NA	NA	NA	NA	NA	NA
NA	NCI_N_cadherin_signaling_events_Pathway_(actin_filament_polymerization)	NA	NA	NA	NA	NA	NA	NA	NA	NA	NA	NA	NA	NA
NA	NCI_N_cadherin_signaling_events_Pathway_(regulation_of_cell_cell_adhesion)	NA	NA	NA	NA	NA	NA	NA	NA	NA	NA	NA	NA	NA
NA	NCI_N_cadherin_signaling_events_Pathway_(regulation_of_synapse_organization)	NA	NA	NA	NA	NA	NA	NA	NA	NA	NA	NA	NA	NA
NA	NCI_Neurotrophic_factor_mediated_Trk_receptor_signaling_Pathway_(axon_guidance)	NA	NA	NA	NA	NA	NA	NA	NA	NA	NA	NA	NA	NA
NA	NCI_Neurotrophic_factor_mediated_Trk_receptor_signaling_Pathway_(MAPKKK_cascade)	NA	NA	NA	NA	NA	NA	NA	NA	NA	NA	NA	NA	NA
NA	NCI_Nongenotropic_Androgen_signaling_Pathway_(actin_cytoskeleton_reorganization)	NA	NA	NA	NA	NA	NA	NA	NA	NA	NA	NA	NA	NA
NA	NCI_Notch_mediated_HES_HEY_network_Pathway_(Pathway_degradation_of_HEY1)	NA	NA	NA	NA	NA	NA	NA	NA	NA	NA	NA	NA	NA
NA	NCI_Notch_signaling_Main_Pathway	NA	NA	NA	NA	NA	NA	NA	NA	NA	NA	NA	NA	NA
NA	NCI_Notch_signaling_Pathway_(Bergmann_glial_cell_differentiation)	NA	NA	NA	NA	NA	NA	NA	NA	NA	NA	NA	NA	NA
NA	NCI_Notch_signaling_Pathway_(oligodendrocyte_development)	NA	NA	NA	NA	NA	NA	NA	NA	NA	NA	NA	NA	NA
NA	NCI_Osteopontin_mediated_events_Main_Pathway	NA	NA	NA	NA	NA	NA	NA	NA	NA	NA	NA	NA	NA
NA	NCI_Osteopontin_mediated_events_Pathway_(bone_resorption)	NA	NA	NA	NA	NA	NA	NA	NA	NA	NA	NA	NA	NA
NA	NCI_Osteopontin_mediated_events_Pathway_(ruffle_organization)	NA	NA	NA	NA	NA	NA	NA	NA	NA	NA	NA	NA	NA
NA	NCI_p38_signaling_mediated_by_MAPKAP_kinases_Main_Pathway	NA	NA	NA	NA	NA	NA	NA	NA	NA	NA	NA	NA	NA
NA	NCI_p38_signaling_mediated_by_MAPKAP_kinases_Pathway_(regulation_of_mRNA_stability)	NA	NA	NA	NA	NA	NA	NA	NA	NA	NA	NA	NA	NA
NA	NCI_p53_Main_Pathway	NA	NA	NA	NA	NA	NA	NA	NA	NA	NA	NA	NA	NA
NA	NCI_p53_Pathway_(apoptosis)	NA	NA	NA	NA	NA	NA	NA	NA	NA	NA	NA	NA	NA
NA	NCI_p53_Pathway_(proteasomal_ubiquitin_dependent_protein_catabolic_process)	NA	NA	NA	NA	NA	NA	NA	NA	NA	NA	NA	NA	NA
NA	NCI_p73_transcription_factor_network_Main_Pathway	NA	NA	NA	NA	NA	NA	NA	NA	NA	NA	NA	NA	NA
NA	NCI_p73_transcription_factor_network_Pathway_(apoptosis)	NA	NA	NA	NA	NA	NA	NA	NA	NA	NA	NA	NA	NA
NA	NCI_Plexin_D1_Signaling_Pathway_(receptor_recycling)	NA	NA	NA	NA	NA	NA	NA	NA	NA	NA	NA	NA	NA
NA	NCI_PLK3_signaling_events_Main_Pathway	NA	NA	NA	NA	NA	NA	NA	NA	NA	NA	NA	NA	NA
NA	NCI_Posttranslational_regulation_of_adherens_junction_stability_and_dissassembly_Main_Pathway	NA	NA	NA	NA	NA	NA	NA	NA	NA	NA	NA	NA	NA
NA	NCI_Regulation_of_Androgen_receptor_activity_Main_Pathway	NA	NA	NA	NA	NA	NA	NA	NA	NA	NA	NA	NA	NA
NA	NCI_Regulation_of_Androgen_receptor_activity_Pathway_(cell_proliferation)	NA	NA	NA	NA	NA	NA	NA	NA	NA	NA	NA	NA	NA
NA	NCI_Regulation_of_CDC42_activity_Main_Pathway	NA	NA	NA	NA	NA	NA	NA	NA	NA	NA	NA	NA	NA
NA	NCI_Regulation_of_p38_alpha_and_p38_beta_Main_Pathway	NA	NA	NA	NA	NA	NA	NA	NA	NA	NA	NA	NA	NA
NA	NCI_Regulation_of_p38_alpha_and_p38_beta_Pathway_(positive_regulation_of_innate_immune_response)	NA	NA	NA	NA	NA	NA	NA	NA	NA	NA	NA	NA	NA
NA	NCI_Regulation_of_RAC1_activity_Main_Pathway	NA	NA	NA	NA	NA	NA	NA	NA	NA	NA	NA	NA	NA
NA	NCI_Regulation_of_RhoA_activity_Main_Pathway	NA	NA	NA	NA	NA	NA	NA	NA	NA	NA	NA	NA	NA
NA	NCI_Regulation_of_Telomerase_Pathway_(cell_cycle)	NA	NA	NA	NA	NA	NA	NA	NA	NA	NA	NA	NA	NA
NA	NCI_Role_of_Calcineurin_dependent_NFAT_signaling_in_lymphocytes_Pathway_(apoptosis)	NA	NA	NA	NA	NA	NA	NA	NA	NA	NA	NA	NA	NA
NA	NCI_S1P1_Pathway_(receptor_internalization)	NA	NA	NA	NA	NA	NA	NA	NA	NA	NA	NA	NA	NA
NA	NCI_SHP2_signaling_Main_Pathway	NA	NA	NA	NA	NA	NA	NA	NA	NA	NA	NA	NA	NA
NA	NCI_Signaling_events_mediated_by_HDAC_Class_III_Main_Pathway	NA	NA	NA	NA	NA	NA	NA	NA	NA	NA	NA	NA	NA
NA	NCI_Signaling_events_mediated_by_HDAC_Class_III_Pathway_(regulation_of_S_phase_of_mitotic_cell_cycle)	NA	NA	NA	NA	NA	NA	NA	NA	NA	NA	NA	NA	NA
NA	NCI_Signaling_events_mediated_by_PRL_Pathway_(cell_motility)	NA	NA	NA	NA	NA	NA	NA	NA	NA	NA	NA	NA	NA
NA	NCI_Signaling_events_mediated_by_PRL_Pathway_(mitosis)	NA	NA	NA	NA	NA	NA	NA	NA	NA	NA	NA	NA	NA
NA	NCI_Signaling_events_mediated_by_Stem_cell_factor_receptor_c_Kit__Main_Pathway	NA	NA	NA	NA	NA	NA	NA	NA	NA	NA	NA	NA	NA
NA	NCI_Signaling_events_mediated_by_Stem_cell_factor_receptor_c_Kit__Pathway_(actin_filament_polymerization)	NA	NA	NA	NA	NA	NA	NA	NA	NA	NA	NA	NA	NA
NA	NCI_Signaling_events_mediated_by_Stem_cell_factor_receptor_c_Kit__Pathway_(cell_migration)	NA	NA	NA	NA	NA	NA	NA	NA	NA	NA	NA	NA	NA
NA	NCI_Signaling_events_mediated_by_Stem_cell_factor_receptor_c_Kit__Pathway_(cell_motility)	NA	NA	NA	NA	NA	NA	NA	NA	NA	NA	NA	NA	NA
NA	NCI_Signaling_events_mediated_by_Stem_cell_factor_receptor_c_Kit__Pathway_(cell_proliferation)	NA	NA	NA	NA	NA	NA	NA	NA	NA	NA	NA	NA	NA
NA	NCI_Signaling_events_mediated_by_Stem_cell_factor_receptor_c_Kit__Pathway_(megakaryocyte_differentiation)	NA	NA	NA	NA	NA	NA	NA	NA	NA	NA	NA	NA	NA
NA	NCI_Signaling_events_mediated_by_Stem_cell_factor_receptor_c_Kit__Pathway_(Pathway_positive_regulation_of_transcription_via_MAPK3)	NA	NA	NA	NA	NA	NA	NA	NA	NA	NA	NA	NA	NA
NA	NCI_Signaling_events_mediated_by_Stem_cell_factor_receptor_c_Kit__Pathway_(positive_regulation_of_cell_proliferation)	NA	NA	NA	NA	NA	NA	NA	NA	NA	NA	NA	NA	NA
NA	NCI_Signaling_events_mediated_by_Stem_cell_factor_receptor_c_Kit__Pathway_(response_to_radiation)	NA	NA	NA	NA	NA	NA	NA	NA	NA	NA	NA	NA	NA
NA	NCI_Signaling_events_mediated_by_VEGFR1_and_VEGFR2_Pathway_(cell_proliferation)	NA	NA	NA	NA	NA	NA	NA	NA	NA	NA	NA	NA	NA
NA	NCI_Signaling_events_mediated_by_VEGFR1_and_VEGFR2_Pathway_(stress_fiber_assembly)	NA	NA	NA	NA	NA	NA	NA	NA	NA	NA	NA	NA	NA
NA	NCI_Signaling_events_regulated_by_Ret_tyrosine_kinase_Main_Pathway	NA	NA	NA	NA	NA	NA	NA	NA	NA	NA	NA	NA	NA
NA	NCI_Signaling_events_regulated_by_Ret_tyrosine_kinase_Pathway_(activation_of_MAPKK_activity)	NA	NA	NA	NA	NA	NA	NA	NA	NA	NA	NA	NA	NA
NA	NCI_Signaling_events_regulated_by_Ret_tyrosine_kinase_Pathway_(lamellipodium_assembly)	NA	NA	NA	NA	NA	NA	NA	NA	NA	NA	NA	NA	NA
NA	NCI_Signaling_events_regulated_by_Ret_tyrosine_kinase_Pathway_(MAPKKK_cascade)	NA	NA	NA	NA	NA	NA	NA	NA	NA	NA	NA	NA	NA
NA	NCI_Signaling_events_regulated_by_Ret_tyrosine_kinase_Pathway_(tube_development)	NA	NA	NA	NA	NA	NA	NA	NA	NA	NA	NA	NA	NA
NA	NCI_Signaling_mediated_by_p38_alpha_and_p38_beta_Main_Pathway	NA	NA	NA	NA	NA	NA	NA	NA	NA	NA	NA	NA	NA
NA	NCI_Stabilization_and_expansion_of_the_E_cadherin_adherens_junction_Pathway_(actin_cytoskeleton_organization)	NA	NA	NA	NA	NA	NA	NA	NA	NA	NA	NA	NA	NA
NA	NCI_Stabilization_and_expansion_of_the_E_cadherin_adherens_junction_Pathway_(cortical_microtubule_organization)	NA	NA	NA	NA	NA	NA	NA	NA	NA	NA	NA	NA	NA
NA	NCI_Stabilization_and_expansion_of_the_E_cadherin_adherens_junction_Pathway_(epithelial_cell_differentiation)	NA	NA	NA	NA	NA	NA	NA	NA	NA	NA	NA	NA	NA
NA	NCI_Stabilization_and_expansion_of_the_E_cadherin_adherens_junction_Pathway_(regulation_of_calcium_dependent_cell_cell_adhesion)	NA	NA	NA	NA	NA	NA	NA	NA	NA	NA	NA	NA	NA
NA	NCI_Stabilization_and_expansion_of_the_E_cadherin_adherens_junction_Pathway_(Wnt_receptor_signaling_pathway)	NA	NA	NA	NA	NA	NA	NA	NA	NA	NA	NA	NA	NA
NA	NCI_Syndecan_1_mediated_signaling_events_Main_Pathway	NA	NA	NA	NA	NA	NA	NA	NA	NA	NA	NA	NA	NA
NA	NCI_Syndecan_1_mediated_signaling_events_Pathway_(homophilic_cell_adhesion)	NA	NA	NA	NA	NA	NA	NA	NA	NA	NA	NA	NA	NA
NA	NCI_Syndecan_1_mediated_signaling_events_Pathway_(positive_regulation_of_cell_migration)	NA	NA	NA	NA	NA	NA	NA	NA	NA	NA	NA	NA	NA
NA	NCI_Syndecan_1_mediated_signaling_events_Pathway_(Tumor_Cell_Invasion)	NA	NA	NA	NA	NA	NA	NA	NA	NA	NA	NA	NA	NA
NA	NCI_Syndecan_2_mediated_signaling_events_Pathway_(dendrite_morphogenesis)	NA	NA	NA	NA	NA	NA	NA	NA	NA	NA	NA	NA	NA
NA	NCI_Syndecan_2_mediated_signaling_events_Pathway_(determination_of_left_right_symmetry)	NA	NA	NA	NA	NA	NA	NA	NA	NA	NA	NA	NA	NA
NA	NCI_Syndecan_3_mediated_signaling_events_Pathway_(limb_bud_formation)	NA	NA	NA	NA	NA	NA	NA	NA	NA	NA	NA	NA	NA
NA	NCI_TGF_beta_receptor_signaling_Main_Pathway	NA	NA	NA	NA	NA	NA	NA	NA	NA	NA	NA	NA	NA
NA	NCI_Thromboxane_A2_receptor_signaling_Pathway_(chemotaxis)	NA	NA	NA	NA	NA	NA	NA	NA	NA	NA	NA	NA	NA
NA	NCI_Thromboxane_A2_receptor_signaling_Pathway_(MAPKKK_cascade)	NA	NA	NA	NA	NA	NA	NA	NA	NA	NA	NA	NA	NA
NA	NCI_Thromboxane_A2_receptor_signaling_Pathway_(muscle_contraction)	NA	NA	NA	NA	NA	NA	NA	NA	NA	NA	NA	NA	NA
NA	NCI_Trk_receptor_signaling_mediated_by_the_MAPK_Pathway_(neuron_projection_morphogenesis)	NA	NA	NA	NA	NA	NA	NA	NA	NA	NA	NA	NA	NA
NA	NCI_Urokinase_type_plasminogen_activator_uPA_and_uPAR_mediated_signaling_Main_Pathway	NA	NA	NA	NA	NA	NA	NA	NA	NA	NA	NA	NA	NA
NA	NCI_Urokinase_type_plasminogen_activator_uPA_and_uPAR_mediated_signaling_Pathway_(cell_proliferation)	NA	NA	NA	NA	NA	NA	NA	NA	NA	NA	NA	NA	NA
NA	NCI_Validated_transcriptional_targets_of_TAp63_isoforms_Pathway_(Metastasis)	NA	NA	NA	NA	NA	NA	NA	NA	NA	NA	NA	NA	NA
NA	NCI_Validated_transcriptional_targets_of_TAp63_isoforms_Pathway_(Pathway_degradation_of_TP63)	NA	NA	NA	NA	NA	NA	NA	NA	NA	NA	NA	NA	NA
NA	NCI_VEGF_and_VEGFR_signaling_network_Main_Pathway	NA	NA	NA	NA	NA	NA	NA	NA	NA	NA	NA	NA	NA
NA	NCI_VEGFR1_specific_signals_Main_Pathway	NA	NA	NA	NA	NA	NA	NA	NA	NA	NA	NA	NA	NA
NA	NCI_VEGFR3_signaling_in_lymphatic_endothelium_Main_Pathway	NA	NA	NA	NA	NA	NA	NA	NA	NA	NA	NA	NA	NA
NA	NCI_VEGFR3_signaling_in_lymphatic_endothelium_Pathway_(cell_proliferation)	NA	NA	NA	NA	NA	NA	NA	NA	NA	NA	NA	NA	NA
NA	NGF_Pathway_Gene_Expression_via_MYC_ELK1_CREB3_NFKB2	NA	NA	NA	NA	NA	NA	NA	NA	NA	NA	NA	NA	NA
NA	Notch_Signaling_Pathway	NA	NA	NA	NA	NA	NA	NA	NA	NA	NA	NA	NA	NA
NA	Notch_Signaling_Pathway_gamma_Secretase	NA	NA	NA	NA	NA	NA	NA	NA	NA	NA	NA	NA	NA
NA	Notch_Signaling_Pathway_Gene_Expression_Chromatin_Remodeling_via_RBPJ	NA	NA	NA	NA	NA	NA	NA	NA	NA	NA	NA	NA	NA
NA	Notch_Signaling_Pathway_Transcription_of_Target_Genes_Hairy_E-SpI_via_RBPJ	NA	NA	NA	NA	NA	NA	NA	NA	NA	NA	NA	NA	NA
NA	p38_Signaling_Pathway	NA	NA	NA	NA	NA	NA	NA	NA	NA	NA	NA	NA	NA
NA	PAK_Pathway	NA	NA	NA	NA	NA	NA	NA	NA	NA	NA	NA	NA	NA
NA	PAK_Pathway_Actin_Organization	NA	NA	NA	NA	NA	NA	NA	NA	NA	NA	NA	NA	NA
NA	PAK_Pathway_Cell_Survival	NA	NA	NA	NA	NA	NA	NA	NA	NA	NA	NA	NA	NA
NA	PAK_Pathway_Lamelliopodia_and_Filopodia_Outgrowth	NA	NA	NA	NA	NA	NA	NA	NA	NA	NA	NA	NA	NA
NA	PTEN_Pathway	NA	NA	NA	NA	NA	NA	NA	NA	NA	NA	NA	NA	NA
NA	PTEN_Pathway_Adhesion_or_Migration	NA	NA	NA	NA	NA	NA	NA	NA	NA	NA	NA	NA	NA
NA	PTEN_Pathway_Proliferation_CyclinA2_Geminin_AuroraA_PLK1	NA	NA	NA	NA	NA	NA	NA	NA	NA	NA	NA	NA	NA
NA	PTEN_Pathway_Senescence_Ets2_p16	NA	NA	NA	NA	NA	NA	NA	NA	NA	NA	NA	NA	NA
NA	Ras_Pathway	NA	NA	NA	NA	NA	NA	NA	NA	NA	NA	NA	NA	NA
NA	Ras_Pathway_Cell-Cell_Junctions	NA	NA	NA	NA	NA	NA	NA	NA	NA	NA	NA	NA	NA
NA	Ras_Pathway_Golgi_Trafficking_and_Vesicle_Formation	NA	NA	NA	NA	NA	NA	NA	NA	NA	NA	NA	NA	NA
NA	Ras_Pathway_Increased_T-cell_Adhesion	NA	NA	NA	NA	NA	NA	NA	NA	NA	NA	NA	NA	NA
NA	reactome_A_third_proteolytic_cleavage_releases_NICD_Main_Pathway	NA	NA	NA	NA	NA	NA	NA	NA	NA	NA	NA	NA	NA
NA	reactome_Abacavir_metabolism_Main_Pathway	NA	NA	NA	NA	NA	NA	NA	NA	NA	NA	NA	NA	NA
NA	reactome_Abacavir_transmembrane_transport_Main_Pathway	NA	NA	NA	NA	NA	NA	NA	NA	NA	NA	NA	NA	NA
NA	reactome_ABCA_transporters_in_lipid_homeostasis_Main_Pathway	NA	NA	NA	NA	NA	NA	NA	NA	NA	NA	NA	NA	NA
NA	reactome_Acetylcholine_Neurotransmitter_Release_Cycle_Main_Pathway	NA	NA	NA	NA	NA	NA	NA	NA	NA	NA	NA	NA	NA
NA	reactome_Activation_of_BAD_and_translocation_to_mitochondria_Main_Pathway	NA	NA	NA	NA	NA	NA	NA	NA	NA	NA	NA	NA	NA
NA	reactome_Activation_of_C3_and_C5_Main_Pathway	NA	NA	NA	NA	NA	NA	NA	NA	NA	NA	NA	NA	NA
NA	reactome_Activation_of_Matrix_Metalloproteinases_Main_Pathway	NA	NA	NA	NA	NA	NA	NA	NA	NA	NA	NA	NA	NA
NA	reactome_Activation_of_RAS_in_B_cells_Main_Pathway	NA	NA	NA	NA	NA	NA	NA	NA	NA	NA	NA	NA	NA
NA	reactome_Acyl_chain_remodeling_of_DAG_and_TAG_Main_Pathway	NA	NA	NA	NA	NA	NA	NA	NA	NA	NA	NA	NA	NA
NA	reactome_Acyl_chain_remodelling_of_PC_Main_Pathway	NA	NA	NA	NA	NA	NA	NA	NA	NA	NA	NA	NA	NA
NA	reactome_Acyl_chain_remodelling_of_PI_Main_Pathway	NA	NA	NA	NA	NA	NA	NA	NA	NA	NA	NA	NA	NA
NA	reactome_Adherens_junctions_interactions_Main_Pathway	NA	NA	NA	NA	NA	NA	NA	NA	NA	NA	NA	NA	NA
NA	reactome_Adrenaline_signalling_through_Alpha_2_adrenergic_receptor_Main_Pathway	NA	NA	NA	NA	NA	NA	NA	NA	NA	NA	NA	NA	NA
NA	reactome_Adrenoceptors_Main_Pathway	NA	NA	NA	NA	NA	NA	NA	NA	NA	NA	NA	NA	NA
NA	reactome_Alternative_complement_activation_Main_Pathway	NA	NA	NA	NA	NA	NA	NA	NA	NA	NA	NA	NA	NA
NA	reactome_Amine_compound_SLC_transporters_Main_Pathway	NA	NA	NA	NA	NA	NA	NA	NA	NA	NA	NA	NA	NA
NA	reactome_Amino_acid_and_oligopeptide_SLC_transporters_Main_Pathway	NA	NA	NA	NA	NA	NA	NA	NA	NA	NA	NA	NA	NA
NA	reactome_Amino_acid_transport_across_the_plasma_membrane_Main_Pathway	NA	NA	NA	NA	NA	NA	NA	NA	NA	NA	NA	NA	NA
NA	reactome_Anchoring_fibril_formation_Main_Pathway	NA	NA	NA	NA	NA	NA	NA	NA	NA	NA	NA	NA	NA
NA	reactome_Androgen_biosynthesis_Main_Pathway	NA	NA	NA	NA	NA	NA	NA	NA	NA	NA	NA	NA	NA
NA	reactome_Antigen_Presentation_Folding_assembly_and_peptide_loading_of_class_I_MHC_Main_Pathway	NA	NA	NA	NA	NA	NA	NA	NA	NA	NA	NA	NA	NA
NA	reactome_Apoptotic_cleavage_of_cell_adhesion_proteins_Main_Pathway	NA	NA	NA	NA	NA	NA	NA	NA	NA	NA	NA	NA	NA
NA	reactome_Arachidonate_production_from_DAG_Main_Pathway	NA	NA	NA	NA	NA	NA	NA	NA	NA	NA	NA	NA	NA
NA	reactome_Asymmetric_localization_of_PCP_proteins_Main_Pathway	NA	NA	NA	NA	NA	NA	NA	NA	NA	NA	NA	NA	NA
NA	reactome_Beta_oxidation_of_very_long_chain_fatty_acids_Main_Pathway	NA	NA	NA	NA	NA	NA	NA	NA	NA	NA	NA	NA	NA
NA	reactome_Bile_salt_and_organic_anion_SLC_transporters_Main_Pathway	NA	NA	NA	NA	NA	NA	NA	NA	NA	NA	NA	NA	NA
NA	reactome_Binding_and_entry_of_HIV_virion_Main_Pathway	NA	NA	NA	NA	NA	NA	NA	NA	NA	NA	NA	NA	NA
NA	reactome_Ca_activated_K_channels_Main_Pathway	NA	NA	NA	NA	NA	NA	NA	NA	NA	NA	NA	NA	NA
NA	reactome_Caspase_mediated_cleavage_of_cytoskeletal_proteins_Main_Pathway	NA	NA	NA	NA	NA	NA	NA	NA	NA	NA	NA	NA	NA
NA	reactome_cGMP_effects_Main_Pathway	NA	NA	NA	NA	NA	NA	NA	NA	NA	NA	NA	NA	NA
NA	reactome_Chondroitin_sulfate_biosynthesis_Main_Pathway	NA	NA	NA	NA	NA	NA	NA	NA	NA	NA	NA	NA	NA
NA	reactome_Circadian_Clock_Main_Pathway	NA	NA	NA	NA	NA	NA	NA	NA	NA	NA	NA	NA	NA
NA	reactome_Class_II_GLUTs_Main_Pathway	NA	NA	NA	NA	NA	NA	NA	NA	NA	NA	NA	NA	NA
NA	reactome_Classical_Kir_channels_Main_Pathway	NA	NA	NA	NA	NA	NA	NA	NA	NA	NA	NA	NA	NA
NA	reactome_Clathrin_derived_vesicle_budding_Main_Pathway	NA	NA	NA	NA	NA	NA	NA	NA	NA	NA	NA	NA	NA
NA	reactome_Collagen_biosynthesis_and_modifying_enzymes_Main_Pathway	NA	NA	NA	NA	NA	NA	NA	NA	NA	NA	NA	NA	NA
NA	reactome_Collagen_degradation_Main_Pathway	NA	NA	NA	NA	NA	NA	NA	NA	NA	NA	NA	NA	NA
NA	reactome_Constitutive_Signaling_by_NOTCH1_t_7_9_NOTCH1_M1580_K2555_Translocation_Mutant_Main_Pathway	NA	NA	NA	NA	NA	NA	NA	NA	NA	NA	NA	NA	NA
NA	reactome_Cross_presentation_of_particulate_exogenous_antigens_phagosomes__Main_Pathway	NA	NA	NA	NA	NA	NA	NA	NA	NA	NA	NA	NA	NA
NA	reactome_Crosslinking_of_collagen_fibrils_Main_Pathway	NA	NA	NA	NA	NA	NA	NA	NA	NA	NA	NA	NA	NA
NA	reactome_CS_DS_degradation_Main_Pathway	NA	NA	NA	NA	NA	NA	NA	NA	NA	NA	NA	NA	NA
NA	reactome_CTLA4_inhibitory_signaling_Main_Pathway	NA	NA	NA	NA	NA	NA	NA	NA	NA	NA	NA	NA	NA
NA	reactome_Cyclin_D_associated_events_in_G1_Main_Pathway	NA	NA	NA	NA	NA	NA	NA	NA	NA	NA	NA	NA	NA
NA	reactome_CYP2E1_reactions_Main_Pathway	NA	NA	NA	NA	NA	NA	NA	NA	NA	NA	NA	NA	NA
NA	reactome_DAG_and_IP3_signaling_Main_Pathway	NA	NA	NA	NA	NA	NA	NA	NA	NA	NA	NA	NA	NA
NA	reactome_Degradation_of_the_extracellular_matrix_Main_Pathway	NA	NA	NA	NA	NA	NA	NA	NA	NA	NA	NA	NA	NA
NA	reactome_Digestion_of_dietary_lipid_Main_Pathway	NA	NA	NA	NA	NA	NA	NA	NA	NA	NA	NA	NA	NA
NA	reactome_Dissolution_of_Fibrin_Clot_Main_Pathway	NA	NA	NA	NA	NA	NA	NA	NA	NA	NA	NA	NA	NA
NA	reactome_Dopamine_Neurotransmitter_Release_Cycle_Main_Pathway	NA	NA	NA	NA	NA	NA	NA	NA	NA	NA	NA	NA	NA
NA	reactome_Dopamine_receptors_Main_Pathway	NA	NA	NA	NA	NA	NA	NA	NA	NA	NA	NA	NA	NA
NA	reactome_Downregulation_of_TGF_beta_receptor_signaling_Main_Pathway	NA	NA	NA	NA	NA	NA	NA	NA	NA	NA	NA	NA	NA
NA	reactome_ECM_proteoglycans_Main_Pathway	NA	NA	NA	NA	NA	NA	NA	NA	NA	NA	NA	NA	NA
NA	reactome_Effects_of_PIP2_hydrolysis_Main_Pathway	NA	NA	NA	NA	NA	NA	NA	NA	NA	NA	NA	NA	NA
NA	reactome_EGFR_interacts_with_phospholipase_C_gamma_Main_Pathway	NA	NA	NA	NA	NA	NA	NA	NA	NA	NA	NA	NA	NA
NA	reactome_EGFR_Transactivation_by_Gastrin_Main_Pathway	NA	NA	NA	NA	NA	NA	NA	NA	NA	NA	NA	NA	NA
NA	reactome_Elastic_fibre_formation_Main_Pathway	NA	NA	NA	NA	NA	NA	NA	NA	NA	NA	NA	NA	NA
NA	reactome_Elevation_of_cytosolic_Ca2_levels_Main_Pathway	NA	NA	NA	NA	NA	NA	NA	NA	NA	NA	NA	NA	NA
NA	reactome_Endosomal_Vacuolar_Main_Pathway	NA	NA	NA	NA	NA	NA	NA	NA	NA	NA	NA	NA	NA
NA	reactome_EPH_ephrin_mediated_repulsion_of_cells_Main_Pathway	NA	NA	NA	NA	NA	NA	NA	NA	NA	NA	NA	NA	NA
NA	reactome_ER_Quality_Control_Compartment_ERQC__Main_Pathway	NA	NA	NA	NA	NA	NA	NA	NA	NA	NA	NA	NA	NA
NA	reactome_ERKs_are_inactivated_Main_Pathway	NA	NA	NA	NA	NA	NA	NA	NA	NA	NA	NA	NA	NA
NA	reactome_Facilitative_Na_independent_glucose_transporters_Main_Pathway	NA	NA	NA	NA	NA	NA	NA	NA	NA	NA	NA	NA	NA
NA	reactome_FasL_CD95L_signaling_Main_Pathway	NA	NA	NA	NA	NA	NA	NA	NA	NA	NA	NA	NA	NA
NA	reactome_FCGR_activation_Main_Pathway	NA	NA	NA	NA	NA	NA	NA	NA	NA	NA	NA	NA	NA
NA	reactome_Fibronectin_matrix_formation_Main_Pathway	NA	NA	NA	NA	NA	NA	NA	NA	NA	NA	NA	NA	NA
NA	reactome_Formation_of_annular_gap_junctions_Main_Pathway	NA	NA	NA	NA	NA	NA	NA	NA	NA	NA	NA	NA	NA
NA	reactome_Formyl_peptide_receptors_bind_formyl_peptides_and_many_other_ligands_Main_Pathway	NA	NA	NA	NA	NA	NA	NA	NA	NA	NA	NA	NA	NA
NA	reactome_GAB1_signalosome_Main_Pathway	NA	NA	NA	NA	NA	NA	NA	NA	NA	NA	NA	NA	NA
NA	reactome_GABA_synthesis_release_reuptake_and_degradation_Main_Pathway	NA	NA	NA	NA	NA	NA	NA	NA	NA	NA	NA	NA	NA
NA	reactome_Gap_junction_assembly_Main_Pathway	NA	NA	NA	NA	NA	NA	NA	NA	NA	NA	NA	NA	NA
NA	reactome_Gap_junction_degradation_Main_Pathway	NA	NA	NA	NA	NA	NA	NA	NA	NA	NA	NA	NA	NA
NA	reactome_Glutamate_Neurotransmitter_Release_Cycle_Main_Pathway	NA	NA	NA	NA	NA	NA	NA	NA	NA	NA	NA	NA	NA
NA	reactome_Glycogen_breakdown_glycogenolysis__Main_Pathway	NA	NA	NA	NA	NA	NA	NA	NA	NA	NA	NA	NA	NA
NA	reactome_Glycogen_synthesis_Main_Pathway	NA	NA	NA	NA	NA	NA	NA	NA	NA	NA	NA	NA	NA
NA	reactome_Glycosphingolipid_metabolism_Main_Pathway	NA	NA	NA	NA	NA	NA	NA	NA	NA	NA	NA	NA	NA
NA	reactome_Growth_hormone_receptor_signaling_Main_Pathway	NA	NA	NA	NA	NA	NA	NA	NA	NA	NA	NA	NA	NA
NA	reactome_Histamine_receptors_Main_Pathway	NA	NA	NA	NA	NA	NA	NA	NA	NA	NA	NA	NA	NA
NA	reactome_Hypusinylation_Main_Pathway	NA	NA	NA	NA	NA	NA	NA	NA	NA	NA	NA	NA	NA
NA	reactome_Initial_triggering_of_complement_Main_Pathway	NA	NA	NA	NA	NA	NA	NA	NA	NA	NA	NA	NA	NA
NA	reactome_Inositol_transporters_Main_Pathway	NA	NA	NA	NA	NA	NA	NA	NA	NA	NA	NA	NA	NA
NA	reactome_Insulin_receptor_recycling_Main_Pathway	NA	NA	NA	NA	NA	NA	NA	NA	NA	NA	NA	NA	NA
NA	reactome_Interaction_With_The_Zona_Pellucida_Main_Pathway	NA	NA	NA	NA	NA	NA	NA	NA	NA	NA	NA	NA	NA
NA	reactome_Interconversion_of_2_oxoglutarate_and_2_hydroxyglutarate_Main_Pathway	NA	NA	NA	NA	NA	NA	NA	NA	NA	NA	NA	NA	NA
NA	reactome_Interconversion_of_polyamines_Main_Pathway	NA	NA	NA	NA	NA	NA	NA	NA	NA	NA	NA	NA	NA
NA	reactome_Interferon_gamma_signaling_Main_Pathway	NA	NA	NA	NA	NA	NA	NA	NA	NA	NA	NA	NA	NA
NA	reactome_Interleukin_6_signaling_Main_Pathway	NA	NA	NA	NA	NA	NA	NA	NA	NA	NA	NA	NA	NA
NA	reactome_Intrinsic_Pathway_Main_Pathway	NA	NA	NA	NA	NA	NA	NA	NA	NA	NA	NA	NA	NA
NA	reactome_Ion_transport_by_P_type_ATPases_Main_Pathway	NA	NA	NA	NA	NA	NA	NA	NA	NA	NA	NA	NA	NA
NA	reactome_IRS_activation_Main_Pathway	NA	NA	NA	NA	NA	NA	NA	NA	NA	NA	NA	NA	NA
NA	reactome_IRS_related_events_triggered_by_IGF1R_Main_Pathway	NA	NA	NA	NA	NA	NA	NA	NA	NA	NA	NA	NA	NA
NA	reactome_ISG15_antiviral_mechanism_Main_Pathway	NA	NA	NA	NA	NA	NA	NA	NA	NA	NA	NA	NA	NA
NA	reactome_Keratan_sulfate_degradation_Main_Pathway	NA	NA	NA	NA	NA	NA	NA	NA	NA	NA	NA	NA	NA
NA	reactome_L1CAM_interactions_Main_Pathway	NA	NA	NA	NA	NA	NA	NA	NA	NA	NA	NA	NA	NA
NA	reactome_Laminin_interactions_Main_Pathway	NA	NA	NA	NA	NA	NA	NA	NA	NA	NA	NA	NA	NA
NA	reactome_Lysosphingolipid_and_LPA_receptors_Main_Pathway	NA	NA	NA	NA	NA	NA	NA	NA	NA	NA	NA	NA	NA
NA	reactome_Metabolism_of_Angiotensinogen_to_Angiotensins_Main_Pathway	NA	NA	NA	NA	NA	NA	NA	NA	NA	NA	NA	NA	NA
NA	reactome_Metal_ion_SLC_transporters_Main_Pathway	NA	NA	NA	NA	NA	NA	NA	NA	NA	NA	NA	NA	NA
NA	reactome_Miscellaneous_substrates_Main_Pathway	NA	NA	NA	NA	NA	NA	NA	NA	NA	NA	NA	NA	NA
NA	reactome_misspliced_LRP5_mutants_have_enhanced_beta_catenin_dependent_signaling_Main_Pathway	NA	NA	NA	NA	NA	NA	NA	NA	NA	NA	NA	NA	NA
NA	reactome_Molecules_associated_with_elastic_fibres_Main_Pathway	NA	NA	NA	NA	NA	NA	NA	NA	NA	NA	NA	NA	NA
NA	reactome_Multifunctional_anion_exchangers_Main_Pathway	NA	NA	NA	NA	NA	NA	NA	NA	NA	NA	NA	NA	NA
NA	reactome_MyD88_cascade_initiated_on_plasma_membrane_Main_Pathway	NA	NA	NA	NA	NA	NA	NA	NA	NA	NA	NA	NA	NA
NA	reactome_MyD88_independent_cascade_Main_Pathway	NA	NA	NA	NA	NA	NA	NA	NA	NA	NA	NA	NA	NA
NA	reactome_N_Glycan_antennae_elongation_Main_Pathway	NA	NA	NA	NA	NA	NA	NA	NA	NA	NA	NA	NA	NA
NA	reactome_N_glycan_trimming_in_the_ER_and_Calnexin_Calreticulin_cycle_Main_Pathway	NA	NA	NA	NA	NA	NA	NA	NA	NA	NA	NA	NA	NA
NA	reactome_Nectin_Necl_trans_heterodimerization_Main_Pathway	NA	NA	NA	NA	NA	NA	NA	NA	NA	NA	NA	NA	NA
NA	reactome_Neurofascin_interactions_Main_Pathway	NA	NA	NA	NA	NA	NA	NA	NA	NA	NA	NA	NA	NA
NA	reactome_NGF_processing_Main_Pathway	NA	NA	NA	NA	NA	NA	NA	NA	NA	NA	NA	NA	NA
NA	reactome_Nicotinate_metabolism_Main_Pathway	NA	NA	NA	NA	NA	NA	NA	NA	NA	NA	NA	NA	NA
NA	reactome_Non_integrin_membrane_ECM_interactions_Main_Pathway	NA	NA	NA	NA	NA	NA	NA	NA	NA	NA	NA	NA	NA
NA	reactome_Norepinephrine_Neurotransmitter_Release_Cycle_Main_Pathway	NA	NA	NA	NA	NA	NA	NA	NA	NA	NA	NA	NA	NA
NA	reactome_NOTCH2_Activation_and_Transmission_of_Signal_to_the_Nucleus_Main_Pathway	NA	NA	NA	NA	NA	NA	NA	NA	NA	NA	NA	NA	NA
NA	reactome_NrCAM_interactions_Main_Pathway	NA	NA	NA	NA	NA	NA	NA	NA	NA	NA	NA	NA	NA
NA	reactome_O_glycosylation_of_TSR_domain_containing_proteins_Main_Pathway	NA	NA	NA	NA	NA	NA	NA	NA	NA	NA	NA	NA	NA
NA	reactome_Oncogene_Induced_Senescence_Main_Pathway	NA	NA	NA	NA	NA	NA	NA	NA	NA	NA	NA	NA	NA
NA	reactome_Organic_anion_transporters_Main_Pathway	NA	NA	NA	NA	NA	NA	NA	NA	NA	NA	NA	NA	NA
NA	reactome_Organic_cation_transport_Main_Pathway	NA	NA	NA	NA	NA	NA	NA	NA	NA	NA	NA	NA	NA
NA	reactome_Oxidative_Stress_Induced_Senescence_Main_Pathway	NA	NA	NA	NA	NA	NA	NA	NA	NA	NA	NA	NA	NA
NA	reactome_Oxygen_dependent_asparagine_hydroxylation_of_Hypoxia_inducible_Factor_Alpha_Main_Pathway	NA	NA	NA	NA	NA	NA	NA	NA	NA	NA	NA	NA	NA
NA	reactome_PECAM1_interactions_Main_Pathway	NA	NA	NA	NA	NA	NA	NA	NA	NA	NA	NA	NA	NA
NA	reactome_Phagosomal_maturation_early_endosomal_stage__Main_Pathway	NA	NA	NA	NA	NA	NA	NA	NA	NA	NA	NA	NA	NA
NA	reactome_PI3K_AKT_activation_Main_Pathway	NA	NA	NA	NA	NA	NA	NA	NA	NA	NA	NA	NA	NA
NA	reactome_PI3K_Cascade_Main_Pathway	NA	NA	NA	NA	NA	NA	NA	NA	NA	NA	NA	NA	NA
NA	reactome_Plasmalogen_biosynthesis_Main_Pathway	NA	NA	NA	NA	NA	NA	NA	NA	NA	NA	NA	NA	NA
NA	reactome_PLC_beta_mediated_events_Main_Pathway	NA	NA	NA	NA	NA	NA	NA	NA	NA	NA	NA	NA	NA
NA	reactome_Pre_NOTCH_Processing_in_Golgi_Main_Pathway	NA	NA	NA	NA	NA	NA	NA	NA	NA	NA	NA	NA	NA
NA	reactome_Pre_NOTCH_Processing_in_the_Endoplasmic_Reticulum_Main_Pathway	NA	NA	NA	NA	NA	NA	NA	NA	NA	NA	NA	NA	NA
NA	reactome_Pregnenolone_biosynthesis_Main_Pathway	NA	NA	NA	NA	NA	NA	NA	NA	NA	NA	NA	NA	NA
NA	reactome_Prolactin_receptor_signaling_Main_Pathway	NA	NA	NA	NA	NA	NA	NA	NA	NA	NA	NA	NA	NA
NA	reactome_Pyruvate_metabolism_Main_Pathway	NA	NA	NA	NA	NA	NA	NA	NA	NA	NA	NA	NA	NA
NA	reactome_Receptor_ligand_binding_initiates_the_second_proteolytic_cleavage_of_Notch_receptor_Main_Pathway	NA	NA	NA	NA	NA	NA	NA	NA	NA	NA	NA	NA	NA
NA	reactome_Recycling_pathway_of_L1_Main_Pathway	NA	NA	NA	NA	NA	NA	NA	NA	NA	NA	NA	NA	NA
NA	reactome_Regulated_proteolysis_of_p75NTR_Main_Pathway	NA	NA	NA	NA	NA	NA	NA	NA	NA	NA	NA	NA	NA
NA	reactome_Regulation_by_c_FLIP_Main_Pathway	NA	NA	NA	NA	NA	NA	NA	NA	NA	NA	NA	NA	NA
NA	reactome_Regulation_of_Complement_cascade_Main_Pathway	NA	NA	NA	NA	NA	NA	NA	NA	NA	NA	NA	NA	NA
NA	reactome_Regulation_of_gene_expression_in_endocrine_committed_NEUROG3_progenitor_cells_Main_Pathway	NA	NA	NA	NA	NA	NA	NA	NA	NA	NA	NA	NA	NA
NA	reactome_Regulation_of_gene_expression_in_late_stage_branching_morphogenesis_pancreatic_bud_precursor_cells_Main_Pathway	NA	NA	NA	NA	NA	NA	NA	NA	NA	NA	NA	NA	NA
NA	reactome_Regulation_of_IFNG_signaling_Main_Pathway	NA	NA	NA	NA	NA	NA	NA	NA	NA	NA	NA	NA	NA
NA	reactome_Regulation_of_IGF_Activity_by_IGFBP_Main_Pathway	NA	NA	NA	NA	NA	NA	NA	NA	NA	NA	NA	NA	NA
NA	reactome_Regulation_of_KIT_signaling_Main_Pathway	NA	NA	NA	NA	NA	NA	NA	NA	NA	NA	NA	NA	NA
NA	reactome_Rhesus_glycoproteins_mediate_ammonium_transport__Main_Pathway	NA	NA	NA	NA	NA	NA	NA	NA	NA	NA	NA	NA	NA
NA	reactome_RIG_I_MDA5_mediated_induction_of_IFN_alpha_beta_pathways_Main_Pathway	NA	NA	NA	NA	NA	NA	NA	NA	NA	NA	NA	NA	NA
NA	reactome_RNA_Polymerase_I_Promoter_Opening_Main_Pathway	NA	NA	NA	NA	NA	NA	NA	NA	NA	NA	NA	NA	NA
NA	reactome_RNF_mutants_show_enhanced_WNT_signaling_and_proliferation_Main_Pathway	NA	NA	NA	NA	NA	NA	NA	NA	NA	NA	NA	NA	NA
NA	reactome_Role_of_LAT2_NTAL_LAB_on_calcium_mobilization_Main_Pathway	NA	NA	NA	NA	NA	NA	NA	NA	NA	NA	NA	NA	NA
NA	reactome_Role_of_phospholipids_in_phagocytosis_Main_Pathway	NA	NA	NA	NA	NA	NA	NA	NA	NA	NA	NA	NA	NA
NA	reactome_Serotonin_Neurotransmitter_Release_Cycle_Main_Pathway	NA	NA	NA	NA	NA	NA	NA	NA	NA	NA	NA	NA	NA
NA	reactome_Serotonin_receptors_Main_Pathway	NA	NA	NA	NA	NA	NA	NA	NA	NA	NA	NA	NA	NA
NA	reactome_SHC_related_events_triggered_by_IGF1R_Main_Pathway	NA	NA	NA	NA	NA	NA	NA	NA	NA	NA	NA	NA	NA
NA	reactome_SHC1_events_in_ERBB2_signaling_Main_Pathway	NA	NA	NA	NA	NA	NA	NA	NA	NA	NA	NA	NA	NA
NA	reactome_SHC1_events_in_ERBB4_signaling_Main_Pathway	NA	NA	NA	NA	NA	NA	NA	NA	NA	NA	NA	NA	NA
NA	reactome_Sialic_acid_metabolism_Main_Pathway	NA	NA	NA	NA	NA	NA	NA	NA	NA	NA	NA	NA	NA
NA	reactome_Signal_attenuation_Main_Pathway	NA	NA	NA	NA	NA	NA	NA	NA	NA	NA	NA	NA	NA
NA	reactome_Signal_transduction_by_L1_Main_Pathway	NA	NA	NA	NA	NA	NA	NA	NA	NA	NA	NA	NA	NA
NA	reactome_Signaling_by_Activin_Main_Pathway	NA	NA	NA	NA	NA	NA	NA	NA	NA	NA	NA	NA	NA
NA	reactome_Signaling_by_EGFR_Main_Pathway	NA	NA	NA	NA	NA	NA	NA	NA	NA	NA	NA	NA	NA
NA	reactome_Signaling_by_ERBB2_Main_Pathway	NA	NA	NA	NA	NA	NA	NA	NA	NA	NA	NA	NA	NA
NA	reactome_Signaling_by_ERBB4_Main_Pathway	NA	NA	NA	NA	NA	NA	NA	NA	NA	NA	NA	NA	NA
NA	reactome_Signaling_by_Leptin_Main_Pathway	NA	NA	NA	NA	NA	NA	NA	NA	NA	NA	NA	NA	NA
NA	reactome_Signaling_by_NOTCH3_Main_Pathway	NA	NA	NA	NA	NA	NA	NA	NA	NA	NA	NA	NA	NA
NA	reactome_Signaling_by_NOTCH4_Main_Pathway	NA	NA	NA	NA	NA	NA	NA	NA	NA	NA	NA	NA	NA
NA	reactome_Signaling_by_SCF_KIT_Main_Pathway	NA	NA	NA	NA	NA	NA	NA	NA	NA	NA	NA	NA	NA
NA	reactome_Signaling_by_Type_1_Insulin_like_Growth_Factor_1_Receptor_IGF1R__Main_Pathway	NA	NA	NA	NA	NA	NA	NA	NA	NA	NA	NA	NA	NA
NA	reactome_Signaling_by_Wnt_Main_Pathway	NA	NA	NA	NA	NA	NA	NA	NA	NA	NA	NA	NA	NA
NA	reactome_Signalling_to_p38_via_RIT_and_RIN_Main_Pathway	NA	NA	NA	NA	NA	NA	NA	NA	NA	NA	NA	NA	NA
NA	reactome_SMAD2_3_MH2_Domain_Mutants_in_Cancer_Main_Pathway	NA	NA	NA	NA	NA	NA	NA	NA	NA	NA	NA	NA	NA
NA	reactome_SMAD2_3_Phosphorylation_Motif_Mutants_in_Cancer_Main_Pathway	NA	NA	NA	NA	NA	NA	NA	NA	NA	NA	NA	NA	NA
NA	reactome_Smooth_Muscle_Contraction_Main_Pathway	NA	NA	NA	NA	NA	NA	NA	NA	NA	NA	NA	NA	NA
NA	reactome_SOS_mediated_signalling_Main_Pathway	NA	NA	NA	NA	NA	NA	NA	NA	NA	NA	NA	NA	NA
NA	reactome_Sperm_Oocyte_Membrane_Binding_Main_Pathway	NA	NA	NA	NA	NA	NA	NA	NA	NA	NA	NA	NA	NA
NA	reactome_Sphingolipid_de_novo_biosynthesis_Main_Pathway	NA	NA	NA	NA	NA	NA	NA	NA	NA	NA	NA	NA	NA
NA	reactome_Stabilization_of_p53_Main_Pathway	NA	NA	NA	NA	NA	NA	NA	NA	NA	NA	NA	NA	NA
NA	reactome_Sulfide_oxidation_to_sulfate_Main_Pathway	NA	NA	NA	NA	NA	NA	NA	NA	NA	NA	NA	NA	NA
NA	reactome_Synthesis_of_Dolichyl_phosphate_Main_Pathway	NA	NA	NA	NA	NA	NA	NA	NA	NA	NA	NA	NA	NA
NA	reactome_Synthesis_of_IP2_IP_and_Ins_in_the_cytosol_Main_Pathway	NA	NA	NA	NA	NA	NA	NA	NA	NA	NA	NA	NA	NA
NA	reactome_Synthesis_of_PC_Main_Pathway	NA	NA	NA	NA	NA	NA	NA	NA	NA	NA	NA	NA	NA
NA	reactome_Synthesis_of_Prostaglandins_PG_and_Thromboxanes_TX__Main_Pathway	NA	NA	NA	NA	NA	NA	NA	NA	NA	NA	NA	NA	NA
NA	reactome_Synthesis_of_UDP_N_acetyl_glucosamine_Main_Pathway	NA	NA	NA	NA	NA	NA	NA	NA	NA	NA	NA	NA	NA
NA	reactome_Terminal_pathway_of_complement_Main_Pathway	NA	NA	NA	NA	NA	NA	NA	NA	NA	NA	NA	NA	NA
NA	reactome_TGF_beta_receptor_signaling_activates_SMADs_Main_Pathway	NA	NA	NA	NA	NA	NA	NA	NA	NA	NA	NA	NA	NA
NA	reactome_TGFBR1_KD_Mutants_in_Cancer_Main_Pathway	NA	NA	NA	NA	NA	NA	NA	NA	NA	NA	NA	NA	NA
NA	reactome_TGFBR2_Kinase_Domain_Mutants_in_Cancer_Main_Pathway	NA	NA	NA	NA	NA	NA	NA	NA	NA	NA	NA	NA	NA
NA	reactome_The_activation_of_arylsulfatases_Main_Pathway	NA	NA	NA	NA	NA	NA	NA	NA	NA	NA	NA	NA	NA
NA	reactome_The_NLRP1_inflammasome_Main_Pathway	NA	NA	NA	NA	NA	NA	NA	NA	NA	NA	NA	NA	NA
NA	reactome_Tie2_Signaling_Main_Pathway	NA	NA	NA	NA	NA	NA	NA	NA	NA	NA	NA	NA	NA
NA	reactome_Toll_Like_Receptor_4_TLR4_Cascade_Main_Pathway	NA	NA	NA	NA	NA	NA	NA	NA	NA	NA	NA	NA	NA
NA	reactome_Toll_Like_Receptor_TLR6_TLR2_Cascade_Main_Pathway	NA	NA	NA	NA	NA	NA	NA	NA	NA	NA	NA	NA	NA
NA	reactome_Toxicity_of_botulinum_toxin_type_B_BoNT_B__Main_Pathway	NA	NA	NA	NA	NA	NA	NA	NA	NA	NA	NA	NA	NA
NA	reactome_Toxicity_of_botulinum_toxin_type_G_BoNT_G__Main_Pathway	NA	NA	NA	NA	NA	NA	NA	NA	NA	NA	NA	NA	NA
NA	reactome_Trafficking_and_processing_of_endosomal_TLR_Main_Pathway	NA	NA	NA	NA	NA	NA	NA	NA	NA	NA	NA	NA	NA
NA	reactome_Trafficking_of_AMPA_receptors_Main_Pathway	NA	NA	NA	NA	NA	NA	NA	NA	NA	NA	NA	NA	NA
NA	reactome_Trafficking_of_GluR2_containing_AMPA_receptors_Main_Pathway	NA	NA	NA	NA	NA	NA	NA	NA	NA	NA	NA	NA	NA
NA	reactome_TRAIL_signaling_Main_Pathway	NA	NA	NA	NA	NA	NA	NA	NA	NA	NA	NA	NA	NA
NA	reactome_Transferrin_endocytosis_and_recycling_Main_Pathway	NA	NA	NA	NA	NA	NA	NA	NA	NA	NA	NA	NA	NA
NA	reactome_Transport_and_synthesis_of_PAPS_Main_Pathway	NA	NA	NA	NA	NA	NA	NA	NA	NA	NA	NA	NA	NA
NA	reactome_Transport_of_glucose_and_other_sugars_bile_salts_and_organic_acids_metal_ions_and_amine_compounds_Main_Pathway	NA	NA	NA	NA	NA	NA	NA	NA	NA	NA	NA	NA	NA
NA	reactome_Transport_of_inorganic_cations_anions_and_amino_acids_oligopeptides_Main_Pathway	NA	NA	NA	NA	NA	NA	NA	NA	NA	NA	NA	NA	NA
NA	reactome_Transport_of_nucleotide_sugars_Main_Pathway	NA	NA	NA	NA	NA	NA	NA	NA	NA	NA	NA	NA	NA
NA	reactome_Transport_of_organic_anions_Main_Pathway	NA	NA	NA	NA	NA	NA	NA	NA	NA	NA	NA	NA	NA
NA	reactome_Type_I_hemidesmosome_assembly_Main_Pathway	NA	NA	NA	NA	NA	NA	NA	NA	NA	NA	NA	NA	NA
NA	reactome_VEGF_binds_to_VEGFR_leading_to_receptor_dimerization_Main_Pathway	NA	NA	NA	NA	NA	NA	NA	NA	NA	NA	NA	NA	NA
NA	reactome_Vitamin_C_ascorbate_metabolism_Main_Pathway	NA	NA	NA	NA	NA	NA	NA	NA	NA	NA	NA	NA	NA
NA	reactome_Vitamin_D_calciferol_metabolism_Main_Pathway	NA	NA	NA	NA	NA	NA	NA	NA	NA	NA	NA	NA	NA
NA	reactome_Vpr_mediated_induction_of_apoptosis_by_mitochondrial_outer_membrane_permeabilization_Main_Pathway	NA	NA	NA	NA	NA	NA	NA	NA	NA	NA	NA	NA	NA
NA	reactome_WNT_ligand_biogenesis_and_trafficking_Main_Pathway	NA	NA	NA	NA	NA	NA	NA	NA	NA	NA	NA	NA	NA
NA	reactome_Xenobiotics_Main_Pathway	NA	NA	NA	NA	NA	NA	NA	NA	NA	NA	NA	NA	NA
NA	reactome_Zinc_influx_into_cells_by_the_SLC39_gene_family_Main_Pathway	NA	NA	NA	NA	NA	NA	NA	NA	NA	NA	NA	NA	NA
NA	STAT3_Pathway	NA	NA	NA	NA	NA	NA	NA	NA	NA	NA	NA	NA	NA
NA	STAT3_Pathway_Growth_Arrest_and_Differentiation	NA	NA	NA	NA	NA	NA	NA	NA	NA	NA	NA	NA	NA
NA	TGF-Beta_Pathway	NA	NA	NA	NA	NA	NA	NA	NA	NA	NA	NA	NA	NA
NA	TGF-Beta_Pathway_Post_Transciptional_G1_Arrest	NA	NA	NA	NA	NA	NA	NA	NA	NA	NA	NA	NA	NA
NA	TRAF_Pathway_Cell_Survival	NA	NA	NA	NA	NA	NA	NA	NA	NA	NA	NA	NA	NA
NA	WNT_Pathway	NA	NA	NA	NA	NA	NA	NA	NA	NA	NA	NA	NA	NA
NA	WNT_Pathway_NFAT_Pathway	NA	NA	NA	NA	NA	NA	NA	NA	NA	NA	NA	NA	NA
NA	WNT_Pathway_PKC_Pathway	NA	NA	NA	NA	NA	NA	NA	NA	NA	NA	NA	NA	NA

## Sheet: GSE59861_3h_GSE55118
X1_sets_GSE55118_middle_vs_young	X1_sets_GSE55118_old_vs_young	X1_sets_GSE59861_3h_2Gy	X1_sets_GSE59861_3h_5cGy	X2_sets_GSE55118_middle_vs_young_GSE55118_old_vs_young	X2_sets_GSE55118_middle_vs_young_GSE59861_3h_2Gy	X2_sets_GSE55118_middle_vs_young_GSE59861_3h_5cGy	X2_sets_GSE55118_old_vs_young_GSE59861_3h_2Gy	X2_sets_GSE55118_old_vs_young_GSE59861_3h_5cGy	X2_sets_GSE59861_3h_2Gy_GSE59861_3h_5cGy	X3_sets_GSE55118_middle_vs_young_GSE55118_old_vs_young_GSE59861_3h_2Gy	X3_sets_GSE55118_middle_vs_young_GSE55118_old_vs_young_GSE59861_3h_5cGy	X3_sets_GSE55118_middle_vs_young_GSE59861_3h_2Gy_GSE59861_3h_5cGy	X3_sets_GSE55118_old_vs_young_GSE59861_3h_2Gy_GSE59861_3h_5cGy	X4_sets_GSE55118_middle_vs_young_GSE55118_old_vs_young_GSE59861_3h_2Gy_GSE59861_3h_5cGy
AHR_Pathway_PS2_Gene_expression_via_ESR1	NCI_CD40_CD40L_signaling_Pathway_(proteasomal_ubiquitin_dependent_protein_catabolic_process)	BRCA1_Pathway_G1_S_arrest	NA	NCI_N_cadherin_signaling_events_Pathway_(adherens_junction_organization)	NA	NA	NA	NA	NA	NA	NA	NA	NA	NA
NCI_Arf6_downstream_Pathway_(liver_development)	NCI_EPHA2_forward_signaling_Main_Pathway	Estrogen_Pathway_Vasodilatation	NA	NCI_RhoA_signaling_Pathway_(Pathway_positive_regulation_of_NF_kappaB_transcription_factor_activity_via_RHOA)	NA	NA	NA	NA	NA	NA	NA	NA	NA	NA
NCI_Arf6_downstream_Pathway_(myoblast_fusion)	NCI_N_cadherin_signaling_events_Pathway_(adherens_junction_organization)	ILK_Signaling_Pathway_Induced_Cell_Proliferation	NA	NCI_Stabilization_and_expansion_of_the_E_cadherin_adherens_junction_Pathway_(adherens_junction_organization)	NA	NA	NA	NA	NA	NA	NA	NA	NA	NA
NCI_Arf6_downstream_Pathway_(regulation_of_epithelial_cell_migration)	NCI_PAR1_mediated_thrombin_signaling_events_Pathway_(chemotaxis)	KEGG_D_Arginine_and_D_ornithine_metabolism_Main_Pathway	NA	NA	NA	NA	NA	NA	NA	NA	NA	NA	NA	NA
NCI_Arf6_downstream_Pathway_(substrate_adhesion_dependent_cell_spreading)	NCI_PAR1_mediated_thrombin_signaling_events_Pathway_(Regulation_of_Cell_Shape)	NCI_Downstream_signaling_in_naive_CD8_T_cells_Pathway_(alpha_beta_T_cell_proliferation)	NA	NA	NA	NA	NA	NA	NA	NA	NA	NA	NA	NA
NCI_Arf6_trafficking_events_Pathway_(clathrin_independent_pinocytosis)	NCI_PAR4_mediated_thrombin_signaling_events_Pathway_(platelet_aggregation)	reactome_Organic_anion_transport_Main_Pathway	NA	NA	NA	NA	NA	NA	NA	NA	NA	NA	NA	NA
NCI_Arf6_trafficking_events_Pathway_(positive_regulation_of_endocytosis)	NCI_PAR4_mediated_thrombin_signaling_events_Pathway_(Regulation_of_Cell_Shape)	reactome_Regulation_of_gene_expression_in_endocrine_committed_NEUROG3_progenitor_cells_Main_Pathway	NA	NA	NA	NA	NA	NA	NA	NA	NA	NA	NA	NA
NCI_Arf6_trafficking_events_Pathway_(receptor_recycling)	NCI_Regulation_of_nuclear_SMAD2_3_signaling_Pathway_(negative_regulation_of_cell_growth)	NA	NA	NA	NA	NA	NA	NA	NA	NA	NA	NA	NA	NA
NCI_LPA_receptor_mediated_events_Pathway_(contractile_ring_contraction_involved_in_cytokinesis)	NCI_RhoA_signaling_Pathway_(Pathway_positive_regulation_of_NF_kappaB_transcription_factor_activity_via_RHOA)	NA	NA	NA	NA	NA	NA	NA	NA	NA	NA	NA	NA	NA
NCI_N_cadherin_signaling_events_Pathway_(adherens_junction_organization)	NCI_Stabilization_and_expansion_of_the_E_cadherin_adherens_junction_Pathway_(adherens_junction_organization)	NA	NA	NA	NA	NA	NA	NA	NA	NA	NA	NA	NA	NA
NCI_PAR1_mediated_thrombin_signaling_events_Pathway_(focal_adhesion_assembly)	NCI_Syndecan_2_mediated_signaling_events_Pathway_(positive_regulation_of_cell_cell_adhesion)	NA	NA	NA	NA	NA	NA	NA	NA	NA	NA	NA	NA	NA
NCI_PLK2_and_PLK4_events_Main_Pathway	reactome_AMPK_inhibits_chREBP_transcriptional_activation_activity_Main_Pathway	NA	NA	NA	NA	NA	NA	NA	NA	NA	NA	NA	NA	NA
NCI_PLK2_and_PLK4_events_Pathway_(regulation_of_centriole_replication)	reactome_Nonhomologous_End_joining_NHEJ__Main_Pathway	NA	NA	NA	NA	NA	NA	NA	NA	NA	NA	NA	NA	NA
NCI_RhoA_signaling_Pathway_(actin_cytoskeleton_organization)	NA	NA	NA	NA	NA	NA	NA	NA	NA	NA	NA	NA	NA	NA
NCI_RhoA_signaling_Pathway_(Golgi_organization)	NA	NA	NA	NA	NA	NA	NA	NA	NA	NA	NA	NA	NA	NA
NCI_RhoA_signaling_Pathway_(Pathway_positive_regulation_of_NF_kappaB_transcription_factor_activity_via_RHOA)	NA	NA	NA	NA	NA	NA	NA	NA	NA	NA	NA	NA	NA	NA
NCI_Stabilization_and_expansion_of_the_E_cadherin_adherens_junction_Pathway_(adherens_junction_organization)	NA	NA	NA	NA	NA	NA	NA	NA	NA	NA	NA	NA	NA	NA
NCI_Syndecan_2_mediated_signaling_events_Pathway_(dendrite_morphogenesis)	NA	NA	NA	NA	NA	NA	NA	NA	NA	NA	NA	NA	NA	NA
NCI_Syndecan_2_mediated_signaling_events_Pathway_(determination_of_left_right_symmetry)	NA	NA	NA	NA	NA	NA	NA	NA	NA	NA	NA	NA	NA	NA
reactome_Mitochondrial_transcription_initiation_Main_Pathway	NA	NA	NA	NA	NA	NA	NA	NA	NA	NA	NA	NA	NA	NA
reactome_PERK_regulates_gene_expression_Main_Pathway	NA	NA	NA	NA	NA	NA	NA	NA	NA	NA	NA	NA	NA	NA
reactome_Synthesis_of_PIPs_at_the_ER_membrane_Main_Pathway	NA	NA	NA	NA	NA	NA	NA	NA	NA	NA	NA	NA	NA	NA

## Sheet: GSE59861_6h_EMTAB2086
X1_sets_EMTAB2086_70_vs_30	X1_sets_EMTAB2086_80_vs_30	X1_sets_GSE59861_6h_2Gy	X1_sets_GSE59861_6h_5cGy	X2_sets_EMTAB2086_70_vs_30_EMTAB2086_80_vs_30	X2_sets_EMTAB2086_70_vs_30_GSE59861_6h_2Gy	X2_sets_EMTAB2086_70_vs_30_GSE59861_6h_5cGy	X2_sets_EMTAB2086_80_vs_30_GSE59861_6h_2Gy	X2_sets_EMTAB2086_80_vs_30_GSE59861_6h_5cGy	X2_sets_GSE59861_6h_2Gy_GSE59861_6h_5cGy	X3_sets_EMTAB2086_70_vs_30_EMTAB2086_80_vs_30_GSE59861_6h_2Gy	X3_sets_EMTAB2086_70_vs_30_EMTAB2086_80_vs_30_GSE59861_6h_5cGy	X3_sets_EMTAB2086_70_vs_30_GSE59861_6h_2Gy_GSE59861_6h_5cGy	X3_sets_EMTAB2086_80_vs_30_GSE59861_6h_2Gy_GSE59861_6h_5cGy	X4_sets_EMTAB2086_70_vs_30_EMTAB2086_80_vs_30_GSE59861_6h_2Gy_GSE59861_6h_5cGy
Akt_Signaling_Pathway_Increased_GLUT4_translocation	AHR_Pathway	BRCA1_Pathway_G1_S_arrest	NA	Akt_Signaling_Pathway_Increased_GLUT4_translocation	BRCA1_Pathway_G1_S_arrest	NA	NA	NA	NA	NA	NA	NA	NA	NA
Akt_Signaling_Pathway_Promotes_Adipogenesis	AHR_Pathway_Cath_D_expression_via_SP1	NA	NA	Akt_Signaling_Pathway_Promotes_Adipogenesis	NA	NA	NA	NA	NA	NA	NA	NA	NA	NA
Akt_Signaling_Pathway_Survival_Genes	AHR_Pathway_PS2_Gene_expression_via_ESR1	NA	NA	Akt_Signaling_Pathway_Survival_Genes	NA	NA	NA	NA	NA	NA	NA	NA	NA	NA
ATM_Pathway	Akt_Signaling_Pathway	NA	NA	ATM_Pathway	NA	NA	NA	NA	NA	NA	NA	NA	NA	NA
ATM_Pathway_G2-Mitosis_progression	Akt_Signaling_Pathway_Blood_cell_differentiation	NA	NA	ATM_Pathway_G2-Mitosis_progression	NA	NA	NA	NA	NA	NA	NA	NA	NA	NA
ATM_Pathway_G2_M_Checkpoint_Arrest	Akt_Signaling_Pathway_Cell_Cycle	NA	NA	ATM_Pathway_G2_M_Checkpoint_Arrest	NA	NA	NA	NA	NA	NA	NA	NA	NA	NA
BRCA1_Pathway_E2_Responsive_Genes	Akt_Signaling_Pathway_Cell_Cycle_Progression	NA	NA	KEGG_Allograft_rejection_Main_Pathway	NA	NA	NA	NA	NA	NA	NA	NA	NA	NA
BRCA1_Pathway_G1_S_arrest	Akt_Signaling_Pathway_Cell_Survival	NA	NA	KEGG_Cell_cycle_Main_Pathway	NA	NA	NA	NA	NA	NA	NA	NA	NA	NA
CD40_Pathway_Gene_Expression_Cell_Adhesion_Molecule_via_NFKB2	Akt_Signaling_Pathway_Genetic_Stability	NA	NA	KEGG_Glycosaminoglycan_degradation_Main_Pathway	NA	NA	NA	NA	NA	NA	NA	NA	NA	NA
CD40_Pathway_Gene_Expression_Cell_Survival_via_NFKB2	Akt_Signaling_Pathway_Glucose_Uptake	NA	NA	KEGG_Mineral_absorption_Main_Pathway	NA	NA	NA	NA	NA	NA	NA	NA	NA	NA
CD40_Pathway_Gene_Expression_Co-Stimulatory_Molecules_via_NFKB2	Akt_Signaling_Pathway_Increased_GLUT4_translocation	NA	NA	KEGG_p53_signaling_Main_Pathway	NA	NA	NA	NA	NA	NA	NA	NA	NA	NA
CD40_Pathway_Gene_Expression_COX2_and_Prostaglandins_via_NFKB2	Akt_Signaling_Pathway_Induction_of_Chromatin_Condensation	NA	NA	KEGG_Prion_diseases_Main_Pathway	NA	NA	NA	NA	NA	NA	NA	NA	NA	NA
CD40_Pathway_Gene_Expression_Immunoglobulin_Class_Switch_via_NFKB2	Akt_Signaling_Pathway_JNK_mediated_apoptosis	NA	NA	KEGG_Synaptic_vesicle_cycle_Main_Pathway	NA	NA	NA	NA	NA	NA	NA	NA	NA	NA
CD40_Pathway_Gene_Expression_Pro-Inflamatory_Cytokines_via_NFKB2	Akt_Signaling_Pathway_Promotes_Adipogenesis	NA	NA	NCI_Alpha6_beta4_integrin_ligand_interactions_Main_Pathway	NA	NA	NA	NA	NA	NA	NA	NA	NA	NA
CD40_Pathway_Gene_Expression_Procoagulant_Activity_via_NFKB2	Akt_Signaling_Pathway_Regulation_of_Na+_Transport	NA	NA	NCI_Angiopoietin_receptor_Tie2_mediated_signaling_Main_Pathway	NA	NA	NA	NA	NA	NA	NA	NA	NA	NA
Cellular_Apoptosis_Pathway_Gene_Expression_FLIP_CIAP2_BFL1_BCL2_via_NFKB2	Akt_Signaling_Pathway_Splicing_Regulation	NA	NA	NCI_Arf6_downstream_Pathway_(cortical_actin_cytoskeleton_organization)	NA	NA	NA	NA	NA	NA	NA	NA	NA	NA
Erythropoietin_Pathway_Gene_Expression_Neuroprotection_via_NFKB2	Akt_Signaling_Pathway_Survival_Genes	NA	NA	NCI_Arf6_downstream_Pathway_(lamellipodium_assembly)	NA	NA	NA	NA	NA	NA	NA	NA	NA	NA
KEGG_Allograft_rejection_Main_Pathway	Akt_Signaling_Pathway_Tumor_Supression	NA	NA	NCI_Arf6_trafficking_events_Pathway_(endocytosis)	NA	NA	NA	NA	NA	NA	NA	NA	NA	NA
KEGG_Cell_cycle_Main_Pathway	ATM_Pathway	NA	NA	NCI_Beta1_integrin_cell_surface_interactions_Main_Pathway	NA	NA	NA	NA	NA	NA	NA	NA	NA	NA
KEGG_Glycosaminoglycan_degradation_Main_Pathway	ATM_Pathway_Cell_Survival	NA	NA	NCI_Beta3_integrin_cell_surface_interactions_Main_Pathway	NA	NA	NA	NA	NA	NA	NA	NA	NA	NA
KEGG_Mineral_absorption_Main_Pathway	ATM_Pathway_G2-Mitosis_progression	NA	NA	NCI_Beta5_beta6_beta7_and_beta8_integrin_cell_surface_interactions_Main_Pathway	NA	NA	NA	NA	NA	NA	NA	NA	NA	NA
KEGG_p53_signaling_Main_Pathway	ATM_Pathway_G2_M_Checkpoint_Arrest	NA	NA	NCI_Caspase_Cascade_in_Apoptosis_Pathway_(apoptotic_nuclear_changes)	NA	NA	NA	NA	NA	NA	NA	NA	NA	NA
KEGG_Prion_diseases_Main_Pathway	cAMP_Pathway_Cytokine_Production	NA	NA	NCI_Class_I_PI3K_signaling_events_mediated_by_Akt_Pathway_(negative_regulation_of_cell_cycle)	NA	NA	NA	NA	NA	NA	NA	NA	NA	NA
KEGG_Synaptic_vesicle_cycle_Main_Pathway	cAMP_Pathway_Glycolisis	NA	NA	NCI_Coregulation_of_Androgen_receptor_activity_Main_Pathway	NA	NA	NA	NA	NA	NA	NA	NA	NA	NA
MAPK_Signaling_Pathway_Cell_Survival	CD40_Pathway_Cell_Survival	NA	NA	NCI_Coregulation_of_Androgen_receptor_activity_Pathway_(cell_proliferation)	NA	NA	NA	NA	NA	NA	NA	NA	NA	NA
mTOR_Pathway_Inflammation_Stress_Resistance	Cellular_Apoptosis_Pathway	NA	NA	NCI_CXCR3_mediated_signaling_events_Pathway_(regulation_of_stress_fiber_assembly)	NA	NA	NA	NA	NA	NA	NA	NA	NA	NA
NCI_Alpha6_beta4_integrin_ligand_interactions_Main_Pathway	Cellular_Apoptosis_Pathway_DNA_Fragmentation	NA	NA	NCI_E2F_transcription_factor_network_Main_Pathway	NA	NA	NA	NA	NA	NA	NA	NA	NA	NA
NCI_Alternative_NF_kappaB_Main_Pathway	Circadian_Pathway	NA	NA	NCI_EGFR_dependent_Endothelin_signaling_events_Main_Pathway	NA	NA	NA	NA	NA	NA	NA	NA	NA	NA
NCI_Alternative_NF_kappaB_Pathway_(regulation_of_B_cell_activation)	CREB_Pathway	NA	NA	NCI_Endothelins_Main_Pathway	NA	NA	NA	NA	NA	NA	NA	NA	NA	NA
NCI_Angiopoietin_receptor_Tie2_mediated_signaling_Main_Pathway	EGF_Pathway_Cytoskeleton_Regulation	NA	NA	NCI_Endothelins_Pathway_(cAMP_biosynthetic_process)	NA	NA	NA	NA	NA	NA	NA	NA	NA	NA
NCI_Arf6_downstream_Pathway_(cortical_actin_cytoskeleton_organization)	EGF_Pathway_EGFR_Endocytosis	NA	NA	NCI_Endothelins_Pathway_(positive_regulation_of_muscle_contraction)	NA	NA	NA	NA	NA	NA	NA	NA	NA	NA
NCI_Arf6_downstream_Pathway_(lamellipodium_assembly)	EGF_Pathway_IP3_Signaling	NA	NA	NCI_EPHA2_forward_signaling_Main_Pathway	NA	NA	NA	NA	NA	NA	NA	NA	NA	NA
NCI_Arf6_trafficking_events_Pathway_(endocytosis)	ERK_Signaling_Pathway	NA	NA	NCI_ErbB4_signaling_events_Pathway_(apoptosis)	NA	NA	NA	NA	NA	NA	NA	NA	NA	NA
NCI_Beta1_integrin_cell_surface_interactions_Main_Pathway	ERK_Signaling_Pathway_EGFR_signaling	NA	NA	NCI_ErbB4_signaling_events_Pathway_(axon_guidance)	NA	NA	NA	NA	NA	NA	NA	NA	NA	NA
NCI_Beta3_integrin_cell_surface_interactions_Main_Pathway	Estrogen_Pathway	NA	NA	NCI_ErbB4_signaling_events_Pathway_(cell_proliferation)	NA	NA	NA	NA	NA	NA	NA	NA	NA	NA
NCI_Beta5_beta6_beta7_and_beta8_integrin_cell_surface_interactions_Main_Pathway	FLT3_Signaling_Pathway_Translation	NA	NA	NCI_ErbB4_signaling_events_Pathway_(chemotaxis)	NA	NA	NA	NA	NA	NA	NA	NA	NA	NA
NCI_Caspase_Cascade_in_Apoptosis_Pathway_(apoptotic_nuclear_changes)	Growth_Hormone_Signaling_Pathway	NA	NA	NCI_ErbB4_signaling_events_Pathway_(dendrite_morphogenesis)	NA	NA	NA	NA	NA	NA	NA	NA	NA	NA
NCI_Caspase_Cascade_in_Apoptosis_Pathway_(neuron_apoptosis)	Growth_Hormone_Signaling_Pathway_Cell_Survival	NA	NA	NCI_ErbB4_signaling_events_Pathway_(epithelial_cell_differentiation)	NA	NA	NA	NA	NA	NA	NA	NA	NA	NA
NCI_CD40_CD40L_signaling_Pathway_(proteasomal_ubiquitin_dependent_protein_catabolic_process)	Growth_Hormone_Signaling_Pathway_Gene_Expression_via_SRF_ELK1_STAT5B_CEBPD_STAT1_STAT3	NA	NA	NCI_ErbB4_signaling_events_Pathway_(heart_development)	NA	NA	NA	NA	NA	NA	NA	NA	NA	NA
NCI_Class_I_PI3K_signaling_events_mediated_by_Akt_Pathway_(negative_regulation_of_cell_cycle)	Growth_Hormone_Signaling_Pathway_Glucose_Uptake	NA	NA	NCI_ErbB4_signaling_events_Pathway_(neural_crest_cell_migration)	NA	NA	NA	NA	NA	NA	NA	NA	NA	NA
NCI_Coregulation_of_Androgen_receptor_activity_Main_Pathway	Growth_Hormone_Signaling_Pathway_Protein_Synthesis	NA	NA	NCI_FAS_CD95_signaling_Main_Pathway	NA	NA	NA	NA	NA	NA	NA	NA	NA	NA
NCI_Coregulation_of_Androgen_receptor_activity_Pathway_(cell_proliferation)	GSK3_Signaling_Pathway_Protein_Synthesis	NA	NA	NCI_FAS_CD95_signaling_Pathway_(neuron_projection_development)	NA	NA	NA	NA	NA	NA	NA	NA	NA	NA
NCI_CXCR3_mediated_signaling_events_Pathway_(regulation_of_stress_fiber_assembly)	HIF1Alpha_Pathway_Gene_Expression_via_JUN_CREB3	NA	NA	NCI_Glypican_1_network_Main_Pathway	NA	NA	NA	NA	NA	NA	NA	NA	NA	NA
NCI_E2F_transcription_factor_network_Main_Pathway	HIF1Alpha_Pathway_HIF1a_Degradation	NA	NA	NCI_Glypican_1_network_Pathway_(BMP_signaling_pathway)	NA	NA	NA	NA	NA	NA	NA	NA	NA	NA
NCI_EGFR_dependent_Endothelin_signaling_events_Main_Pathway	HIF1Alpha_Pathway_NOS_Pathway	NA	NA	NCI_Glypican_1_network_Pathway_(cell_growth)	NA	NA	NA	NA	NA	NA	NA	NA	NA	NA
NCI_Endothelins_Main_Pathway	HIF1Alpha_Pathway_VEGF_Pathway	NA	NA	NCI_Glypican_1_network_Pathway_(fibroblast_growth_factor_receptor_signaling_pathway)	NA	NA	NA	NA	NA	NA	NA	NA	NA	NA
NCI_Endothelins_Pathway_(cAMP_biosynthetic_process)	IGF1R_Signaling_Pathway	NA	NA	NCI_p53_Main_Pathway	NA	NA	NA	NA	NA	NA	NA	NA	NA	NA
NCI_Endothelins_Pathway_(positive_regulation_of_muscle_contraction)	IGF1R_Signaling_Pathway_Cell_Migration	NA	NA	NCI_p53_Pathway_(apoptosis)	NA	NA	NA	NA	NA	NA	NA	NA	NA	NA
NCI_EPHA2_forward_signaling_Main_Pathway	IL-10_Pathway_Stability_Determination	NA	NA	NCI_p53_Pathway_(proteasomal_ubiquitin_dependent_protein_catabolic_process)	NA	NA	NA	NA	NA	NA	NA	NA	NA	NA
NCI_Ephrin_B_reverse_signaling_Pathway_(endothelial_cell_proliferation)	IL-2_Pathway_Apoptosis_Inhibition	NA	NA	NCI_PLK3_signaling_events_Main_Pathway	NA	NA	NA	NA	NA	NA	NA	NA	NA	NA
NCI_ErbB4_signaling_events_Pathway_(apoptosis)	IL-6_Pathway	NA	NA	NCI_Signaling_events_mediated_by_HDAC_Class_III_Pathway_(regulation_of_S_phase_of_mitotic_cell_cycle)	NA	NA	NA	NA	NA	NA	NA	NA	NA	NA
NCI_ErbB4_signaling_events_Pathway_(axon_guidance)	ILK_Signaling_Pathway	NA	NA	NCI_Signaling_events_mediated_by_Stem_cell_factor_receptor_c_Kit__Pathway_(actin_filament_polymerization)	NA	NA	NA	NA	NA	NA	NA	NA	NA	NA
NCI_ErbB4_signaling_events_Pathway_(cell_proliferation)	ILK_Signaling_Pathway_Actin_Polymerization_Cytoskeletal_Reorganization	NA	NA	NCI_Signaling_events_mediated_by_Stem_cell_factor_receptor_c_Kit__Pathway_(cell_migration)	NA	NA	NA	NA	NA	NA	NA	NA	NA	NA
NCI_ErbB4_signaling_events_Pathway_(chemotaxis)	ILK_Signaling_Pathway_Cell_Migration_Retraction	NA	NA	NCI_Signaling_events_mediated_by_Stem_cell_factor_receptor_c_Kit__Pathway_(cell_motility)	NA	NA	NA	NA	NA	NA	NA	NA	NA	NA
NCI_ErbB4_signaling_events_Pathway_(dendrite_morphogenesis)	ILK_Signaling_Pathway_Cell_Motility	NA	NA	NCI_Signaling_events_mediated_by_Stem_cell_factor_receptor_c_Kit__Pathway_(positive_regulation_of_cell_proliferation)	NA	NA	NA	NA	NA	NA	NA	NA	NA	NA
NCI_ErbB4_signaling_events_Pathway_(epithelial_cell_differentiation)	ILK_Signaling_Pathway_Cytoskeletal_Adhesion_Complexes	NA	NA	NCI_Urokinase_type_plasminogen_activator_uPA_and_uPAR_mediated_signaling_Main_Pathway	NA	NA	NA	NA	NA	NA	NA	NA	NA	NA
NCI_ErbB4_signaling_events_Pathway_(heart_development)	ILK_Signaling_Pathway_Epithelial_Mesenchymal_Transition_Tubulo-Interstitial_Fibrosis	NA	NA	NCI_VEGF_and_VEGFR_signaling_network_Main_Pathway	NA	NA	NA	NA	NA	NA	NA	NA	NA	NA
NCI_ErbB4_signaling_events_Pathway_(neural_crest_cell_migration)	ILK_Signaling_Pathway_Induced_Cell_Proliferation	NA	NA	NCI_VEGFR1_specific_signals_Main_Pathway	NA	NA	NA	NA	NA	NA	NA	NA	NA	NA
NCI_FAS_CD95_signaling_Main_Pathway	ILK_Signaling_Pathway_Migration_Vasculogenesis	NA	NA	reactome_Acyl_chain_remodeling_of_DAG_and_TAG_Main_Pathway	NA	NA	NA	NA	NA	NA	NA	NA	NA	NA
NCI_FAS_CD95_signaling_Pathway_(neuron_projection_development)	ILK_Signaling_Pathway_Opsonization	NA	NA	reactome_Amino_acid_and_oligopeptide_SLC_transporters_Main_Pathway	NA	NA	NA	NA	NA	NA	NA	NA	NA	NA
NCI_Glypican_1_network_Main_Pathway	IP3_Pathway	NA	NA	reactome_Antigen_Presentation_Folding_assembly_and_peptide_loading_of_class_I_MHC_Main_Pathway	NA	NA	NA	NA	NA	NA	NA	NA	NA	NA
NCI_Glypican_1_network_Pathway_(BMP_signaling_pathway)	JAK-STAT_Pathway_IFN-Inducible_Gene_Expression_via_STAT2_STAT1	NA	NA	reactome_Apoptotic_cleavage_of_cell_adhesion_proteins_Main_Pathway	NA	NA	NA	NA	NA	NA	NA	NA	NA	NA
NCI_Glypican_1_network_Pathway_(cell_growth)	KEGG_Adrenergic_signaling_in_cardiomyocytes_Main_Pathway	NA	NA	reactome_Arachidonate_production_from_DAG_Main_Pathway	NA	NA	NA	NA	NA	NA	NA	NA	NA	NA
NCI_Glypican_1_network_Pathway_(fibroblast_growth_factor_receptor_signaling_pathway)	KEGG_African_trypanosomiasis_Main_Pathway	NA	NA	reactome_Asymmetric_localization_of_PCP_proteins_Main_Pathway	NA	NA	NA	NA	NA	NA	NA	NA	NA	NA
NCI_HIV_1_Nef_Negative_effector_of_Fas_and_TNF_alpha_Pathway_(Pathway_degradation_of_CASP3_CASP7_CASP6)	KEGG_Allograft_rejection_Main_Pathway	NA	NA	reactome_Caspase_mediated_cleavage_of_cytoskeletal_proteins_Main_Pathway	NA	NA	NA	NA	NA	NA	NA	NA	NA	NA
NCI_p53_Main_Pathway	KEGG_Amino_sugar_and_nucleotide_sugar_metabolism_Main_Pathway	NA	NA	reactome_Clathrin_derived_vesicle_budding_Main_Pathway	NA	NA	NA	NA	NA	NA	NA	NA	NA	NA
NCI_p53_Pathway_(apoptosis)	KEGG_Amoebiasis_Main_Pathway	NA	NA	reactome_Cross_presentation_of_particulate_exogenous_antigens_phagosomes__Main_Pathway	NA	NA	NA	NA	NA	NA	NA	NA	NA	NA
NCI_p53_Pathway_(proteasomal_ubiquitin_dependent_protein_catabolic_process)	KEGG_Amyotrophic_lateral_sclerosis_ALS__Main_Pathway	NA	NA	reactome_Crosslinking_of_collagen_fibrils_Main_Pathway	NA	NA	NA	NA	NA	NA	NA	NA	NA	NA
NCI_PLK3_signaling_events_Main_Pathway	KEGG_Antigen_processing_and_presentation_Main_Pathway	NA	NA	reactome_Cyclin_D_associated_events_in_G1_Main_Pathway	NA	NA	NA	NA	NA	NA	NA	NA	NA	NA
NCI_Signaling_events_mediated_by_HDAC_Class_III_Pathway_(regulation_of_S_phase_of_mitotic_cell_cycle)	KEGG_Arrhythmogenic_right_ventricular_cardiomyopathy_ARVC__Main_Pathway	NA	NA	reactome_Dissolution_of_Fibrin_Clot_Main_Pathway	NA	NA	NA	NA	NA	NA	NA	NA	NA	NA
NCI_Signaling_events_mediated_by_Stem_cell_factor_receptor_c_Kit__Pathway_(actin_filament_polymerization)	KEGG_Butirosin_and_neomycin_biosynthesis_Main_Pathway	NA	NA	reactome_Elastic_fibre_formation_Main_Pathway	NA	NA	NA	NA	NA	NA	NA	NA	NA	NA
NCI_Signaling_events_mediated_by_Stem_cell_factor_receptor_c_Kit__Pathway_(cell_migration)	KEGG_Caffeine_metabolism_Main_Pathway	NA	NA	reactome_Endosomal_Vacuolar_Main_Pathway	NA	NA	NA	NA	NA	NA	NA	NA	NA	NA
NCI_Signaling_events_mediated_by_Stem_cell_factor_receptor_c_Kit__Pathway_(cell_motility)	KEGG_Cell_cycle_Main_Pathway	NA	NA	reactome_ER_Quality_Control_Compartment_ERQC__Main_Pathway	NA	NA	NA	NA	NA	NA	NA	NA	NA	NA
NCI_Signaling_events_mediated_by_Stem_cell_factor_receptor_c_Kit__Pathway_(positive_regulation_of_cell_proliferation)	KEGG_Circadian_rhythm_Main_Pathway	NA	NA	reactome_FasL_CD95L_signaling_Main_Pathway	NA	NA	NA	NA	NA	NA	NA	NA	NA	NA
NCI_Urokinase_type_plasminogen_activator_uPA_and_uPAR_mediated_signaling_Main_Pathway	KEGG_Collecting_duct_acid_secretion_Main_Pathway	NA	NA	reactome_Glycosphingolipid_metabolism_Main_Pathway	NA	NA	NA	NA	NA	NA	NA	NA	NA	NA
NCI_VEGF_and_VEGFR_signaling_network_Main_Pathway	KEGG_Complement_and_coagulation_cascades_Main_Pathway	NA	NA	reactome_Interconversion_of_polyamines_Main_Pathway	NA	NA	NA	NA	NA	NA	NA	NA	NA	NA
NCI_VEGFR1_specific_signals_Main_Pathway	KEGG_Dorso_ventral_axis_formation_Main_Pathway	NA	NA	reactome_Interleukin_6_signaling_Main_Pathway	NA	NA	NA	NA	NA	NA	NA	NA	NA	NA
reactome_Acyl_chain_remodeling_of_DAG_and_TAG_Main_Pathway	KEGG_ECM_receptor_interaction_Main_Pathway	NA	NA	reactome_IRS_activation_Main_Pathway	NA	NA	NA	NA	NA	NA	NA	NA	NA	NA
reactome_AKT_phosphorylates_targets_in_the_cytosol_Main_Pathway	KEGG_Endocrine_and_other_factor_regulated_calcium_reabsorption_Main_Pathway	NA	NA	reactome_L1CAM_interactions_Main_Pathway	NA	NA	NA	NA	NA	NA	NA	NA	NA	NA
reactome_Amino_acid_and_oligopeptide_SLC_transporters_Main_Pathway	KEGG_Endocytosis_Main_Pathway	NA	NA	reactome_Nectin_Necl_trans_heterodimerization_Main_Pathway	NA	NA	NA	NA	NA	NA	NA	NA	NA	NA
reactome_Antigen_Presentation_Folding_assembly_and_peptide_loading_of_class_I_MHC_Main_Pathway	KEGG_ErbB_signaling_Main_Pathway	NA	NA	reactome_Nicotinate_metabolism_Main_Pathway	NA	NA	NA	NA	NA	NA	NA	NA	NA	NA
reactome_Apoptotic_cleavage_of_cell_adhesion_proteins_Main_Pathway	KEGG_Fat_digestion_and_absorption_Main_Pathway	NA	NA	reactome_Organic_anion_transporters_Main_Pathway	NA	NA	NA	NA	NA	NA	NA	NA	NA	NA
reactome_Arachidonate_production_from_DAG_Main_Pathway	KEGG_Glycosaminoglycan_biosynthesis_chondroitin_sulfate_dermatan_sulfate_Main_Pathway	NA	NA	reactome_Organic_cation_transport_Main_Pathway	NA	NA	NA	NA	NA	NA	NA	NA	NA	NA
reactome_Asymmetric_localization_of_PCP_proteins_Main_Pathway	KEGG_Glycosaminoglycan_biosynthesis_heparan_sulfate_heparin_Main_Pathway	NA	NA	reactome_Oxidative_Stress_Induced_Senescence_Main_Pathway	NA	NA	NA	NA	NA	NA	NA	NA	NA	NA
reactome_Caspase_mediated_cleavage_of_cytoskeletal_proteins_Main_Pathway	KEGG_Glycosaminoglycan_degradation_Main_Pathway	NA	NA	reactome_Plasmalogen_biosynthesis_Main_Pathway	NA	NA	NA	NA	NA	NA	NA	NA	NA	NA
reactome_Clathrin_derived_vesicle_budding_Main_Pathway	KEGG_Glycosphingolipid_biosynthesis_ganglio_series_Main_Pathway	NA	NA	reactome_PLC_beta_mediated_events_Main_Pathway	NA	NA	NA	NA	NA	NA	NA	NA	NA	NA
reactome_Cross_presentation_of_particulate_exogenous_antigens_phagosomes__Main_Pathway	KEGG_Hepatitis_C_Main_Pathway	NA	NA	reactome_Regulation_by_c_FLIP_Main_Pathway	NA	NA	NA	NA	NA	NA	NA	NA	NA	NA
reactome_Crosslinking_of_collagen_fibrils_Main_Pathway	KEGG_HIF_1_signaling_Main_Pathway	NA	NA	reactome_Regulation_of_KIT_signaling_Main_Pathway	NA	NA	NA	NA	NA	NA	NA	NA	NA	NA
reactome_Cyclin_D_associated_events_in_G1_Main_Pathway	KEGG_Huntington_s_disease_Main_Pathway	NA	NA	reactome_RIG_I_MDA5_mediated_induction_of_IFN_alpha_beta_pathways_Main_Pathway	NA	NA	NA	NA	NA	NA	NA	NA	NA	NA
reactome_Dissolution_of_Fibrin_Clot_Main_Pathway	KEGG_Inflammatory_mediator_regulation_of_TRP_channels_Main_Pathway	NA	NA	reactome_RNA_Polymerase_I_Promoter_Opening_Main_Pathway	NA	NA	NA	NA	NA	NA	NA	NA	NA	NA
reactome_Elastic_fibre_formation_Main_Pathway	KEGG_Inositol_phosphate_metabolism_Main_Pathway	NA	NA	reactome_Signaling_by_ERBB4_Main_Pathway	NA	NA	NA	NA	NA	NA	NA	NA	NA	NA
reactome_Endosomal_Vacuolar_Main_Pathway	KEGG_Intestinal_immune_network_for_IgA_production_Main_Pathway	NA	NA	reactome_Stabilization_of_p53_Main_Pathway	NA	NA	NA	NA	NA	NA	NA	NA	NA	NA
reactome_ER_Quality_Control_Compartment_ERQC__Main_Pathway	KEGG_Legionellosis_Main_Pathway	NA	NA	reactome_Sulfide_oxidation_to_sulfate_Main_Pathway	NA	NA	NA	NA	NA	NA	NA	NA	NA	NA
reactome_FasL_CD95L_signaling_Main_Pathway	KEGG_Leishmaniasis_Main_Pathway	NA	NA	reactome_Synthesis_of_UDP_N_acetyl_glucosamine_Main_Pathway	NA	NA	NA	NA	NA	NA	NA	NA	NA	NA
reactome_Glycosphingolipid_metabolism_Main_Pathway	KEGG_Linoleic_acid_metabolism_Main_Pathway	NA	NA	reactome_The_activation_of_arylsulfatases_Main_Pathway	NA	NA	NA	NA	NA	NA	NA	NA	NA	NA
reactome_Inflammasomes_Main_Pathway	KEGG_Lysosome_Main_Pathway	NA	NA	reactome_The_NLRP1_inflammasome_Main_Pathway	NA	NA	NA	NA	NA	NA	NA	NA	NA	NA
reactome_Interconversion_of_polyamines_Main_Pathway	KEGG_Malaria_Main_Pathway	NA	NA	reactome_Toxicity_of_botulinum_toxin_type_B_BoNT_B__Main_Pathway	NA	NA	NA	NA	NA	NA	NA	NA	NA	NA
reactome_Interleukin_1_processing_Main_Pathway	KEGG_Maturity_onset_diabetes_of_the_young_Main_Pathway	NA	NA	reactome_Toxicity_of_botulinum_toxin_type_G_BoNT_G__Main_Pathway	NA	NA	NA	NA	NA	NA	NA	NA	NA	NA
reactome_Interleukin_1_signaling_Main_Pathway	KEGG_Melanogenesis_Main_Pathway	NA	NA	reactome_TRAIL_signaling_Main_Pathway	NA	NA	NA	NA	NA	NA	NA	NA	NA	NA
reactome_Interleukin_6_signaling_Main_Pathway	KEGG_MicroRNAs_in_cancer_Main_Pathway	NA	NA	reactome_Transport_and_synthesis_of_PAPS_Main_Pathway	NA	NA	NA	NA	NA	NA	NA	NA	NA	NA
reactome_IRS_activation_Main_Pathway	KEGG_Mineral_absorption_Main_Pathway	NA	NA	reactome_Transport_of_inorganic_cations_anions_and_amino_acids_oligopeptides_Main_Pathway	NA	NA	NA	NA	NA	NA	NA	NA	NA	NA
reactome_L1CAM_interactions_Main_Pathway	KEGG_Nicotinate_and_nicotinamide_metabolism_Main_Pathway	NA	NA	reactome_VEGF_binds_to_VEGFR_leading_to_receptor_dimerization_Main_Pathway	NA	NA	NA	NA	NA	NA	NA	NA	NA	NA
reactome_MyD88_dependent_cascade_initiated_on_endosome_Main_Pathway	KEGG_Notch_signaling_Main_Pathway	NA	NA	NA	NA	NA	NA	NA	NA	NA	NA	NA	NA	NA
reactome_Nectin_Necl_trans_heterodimerization_Main_Pathway	KEGG_Other_glycan_degradation_Main_Pathway	NA	NA	NA	NA	NA	NA	NA	NA	NA	NA	NA	NA	NA
reactome_Nicotinate_metabolism_Main_Pathway	KEGG_Other_types_of_O_glycan_biosynthesis_Main_Pathway	NA	NA	NA	NA	NA	NA	NA	NA	NA	NA	NA	NA	NA
reactome_Organic_anion_transporters_Main_Pathway	KEGG_Oxytocin_signaling_Main_Pathway	NA	NA	NA	NA	NA	NA	NA	NA	NA	NA	NA	NA	NA
reactome_Organic_cation_transport_Main_Pathway	KEGG_p53_signaling_Main_Pathway	NA	NA	NA	NA	NA	NA	NA	NA	NA	NA	NA	NA	NA
reactome_Oxidative_Stress_Induced_Senescence_Main_Pathway	KEGG_Pancreatic_secretion_Main_Pathway	NA	NA	NA	NA	NA	NA	NA	NA	NA	NA	NA	NA	NA
reactome_p53_Dependent_G1_DNA_Damage_Response_Main_Pathway	KEGG_Pathways_in_cancer_Main_Pathway	NA	NA	NA	NA	NA	NA	NA	NA	NA	NA	NA	NA	NA
reactome_PCP_CE_Main_Pathway	KEGG_Pertussis_Main_Pathway	NA	NA	NA	NA	NA	NA	NA	NA	NA	NA	NA	NA	NA
reactome_Plasmalogen_biosynthesis_Main_Pathway	KEGG_Phosphatidylinositol_signaling_system_Main_Pathway	NA	NA	NA	NA	NA	NA	NA	NA	NA	NA	NA	NA	NA
reactome_PLC_beta_mediated_events_Main_Pathway	KEGG_PI3K_Akt_signaling_Main_Pathway	NA	NA	NA	NA	NA	NA	NA	NA	NA	NA	NA	NA	NA
reactome_Prostanoid_ligand_receptors_Main_Pathway	KEGG_Prion_diseases_Main_Pathway	NA	NA	NA	NA	NA	NA	NA	NA	NA	NA	NA	NA	NA
reactome_Regulation_by_c_FLIP_Main_Pathway	KEGG_Prolactin_signaling_Main_Pathway	NA	NA	NA	NA	NA	NA	NA	NA	NA	NA	NA	NA	NA
reactome_Regulation_of_KIT_signaling_Main_Pathway	KEGG_Rap1_signaling_Main_Pathway	NA	NA	NA	NA	NA	NA	NA	NA	NA	NA	NA	NA	NA
reactome_RIG_I_MDA5_mediated_induction_of_IFN_alpha_beta_pathways_Main_Pathway	KEGG_Renin_angiotensin_system_Main_Pathway	NA	NA	NA	NA	NA	NA	NA	NA	NA	NA	NA	NA	NA
reactome_RNA_Polymerase_I_Promoter_Opening_Main_Pathway	KEGG_Riboflavin_metabolism_Main_Pathway	NA	NA	NA	NA	NA	NA	NA	NA	NA	NA	NA	NA	NA
reactome_Role_of_Abl_in_Robo_Slit_signaling_Main_Pathway	KEGG_Small_cell_lung_cancer_Main_Pathway	NA	NA	NA	NA	NA	NA	NA	NA	NA	NA	NA	NA	NA
reactome_SHC_activation_Main_Pathway	KEGG_Sphingolipid_metabolism_Main_Pathway	NA	NA	NA	NA	NA	NA	NA	NA	NA	NA	NA	NA	NA
reactome_Signaling_by_ERBB4_Main_Pathway	KEGG_Staphylococcus_aureus_infection_Main_Pathway	NA	NA	NA	NA	NA	NA	NA	NA	NA	NA	NA	NA	NA
reactome_Stabilization_of_p53_Main_Pathway	KEGG_Starch_and_sucrose_metabolism_Main_Pathway	NA	NA	NA	NA	NA	NA	NA	NA	NA	NA	NA	NA	NA
reactome_Sulfide_oxidation_to_sulfate_Main_Pathway	KEGG_Steroid_biosynthesis_Main_Pathway	NA	NA	NA	NA	NA	NA	NA	NA	NA	NA	NA	NA	NA
reactome_Synthesis_of_UDP_N_acetyl_glucosamine_Main_Pathway	KEGG_Steroid_hormone_biosynthesis_Main_Pathway	NA	NA	NA	NA	NA	NA	NA	NA	NA	NA	NA	NA	NA
reactome_The_activation_of_arylsulfatases_Main_Pathway	KEGG_Sulfur_metabolism_Main_Pathway	NA	NA	NA	NA	NA	NA	NA	NA	NA	NA	NA	NA	NA
reactome_The_NLRP1_inflammasome_Main_Pathway	KEGG_Synaptic_vesicle_cycle_Main_Pathway	NA	NA	NA	NA	NA	NA	NA	NA	NA	NA	NA	NA	NA
reactome_Toxicity_of_botulinum_toxin_type_B_BoNT_B__Main_Pathway	KEGG_Systemic_lupus_erythematosus_Main_Pathway	NA	NA	NA	NA	NA	NA	NA	NA	NA	NA	NA	NA	NA
reactome_Toxicity_of_botulinum_toxin_type_G_BoNT_G__Main_Pathway	KEGG_Thyroid_hormone_synthesis_Main_Pathway	NA	NA	NA	NA	NA	NA	NA	NA	NA	NA	NA	NA	NA
reactome_TRAIL_signaling_Main_Pathway	KEGG_Type_I_diabetes_mellitus_Main_Pathway	NA	NA	NA	NA	NA	NA	NA	NA	NA	NA	NA	NA	NA
reactome_Transport_and_synthesis_of_PAPS_Main_Pathway	KEGG_Wnt_signaling_Main_Pathway	NA	NA	NA	NA	NA	NA	NA	NA	NA	NA	NA	NA	NA
reactome_Transport_of_inorganic_cations_anions_and_amino_acids_oligopeptides_Main_Pathway	MAPK_Signaling_Pathway	NA	NA	NA	NA	NA	NA	NA	NA	NA	NA	NA	NA	NA
reactome_VEGF_binds_to_VEGFR_leading_to_receptor_dimerization_Main_Pathway	MAPK_Signaling_Pathway_Cell_Motility_Inflammation_Apoptosis_Osmoregulation	NA	NA	NA	NA	NA	NA	NA	NA	NA	NA	NA	NA	NA
TRAF_Pathway_Direct_Antimicrobial_Response_and_Cell-Mediated_Immunity_and_Apoptosis_of_Host_Cell	MAPK_Signaling_Pathway_Gene_Expression_Cell_Proliferation_Cell_Survival_Tumorigenesis_Differentiation_Development_via_PXN_CREB3_RPS6KA5_RPS6KA6	NA	NA	NA	NA	NA	NA	NA	NA	NA	NA	NA	NA	NA
NA	Mitochondrial_Apoptosis_Pathway_Apoptosis	NA	NA	NA	NA	NA	NA	NA	NA	NA	NA	NA	NA	NA
NA	Mitochondrial_Apoptosis_Pathway_DNA_Fragmentation	NA	NA	NA	NA	NA	NA	NA	NA	NA	NA	NA	NA	NA
NA	mTOR_Pathway	NA	NA	NA	NA	NA	NA	NA	NA	NA	NA	NA	NA	NA
NA	mTOR_Pathway_Lipid_Synthesis	NA	NA	NA	NA	NA	NA	NA	NA	NA	NA	NA	NA	NA
NA	NCI_ALK1_signaling_events_Main_Pathway	NA	NA	NA	NA	NA	NA	NA	NA	NA	NA	NA	NA	NA
NA	NCI_ALK1_signaling_events_Pathway_(endothelial_cell_migration)	NA	NA	NA	NA	NA	NA	NA	NA	NA	NA	NA	NA	NA
NA	NCI_ALK1_signaling_events_Pathway_(endothelial_cell_proliferation)	NA	NA	NA	NA	NA	NA	NA	NA	NA	NA	NA	NA	NA
NA	NCI_ALK1_signaling_events_Pathway_(sprouting_angiogenesis)	NA	NA	NA	NA	NA	NA	NA	NA	NA	NA	NA	NA	NA
NA	NCI_Alpha_synuclein_signaling_Pathway_(neuron_apoptosis)	NA	NA	NA	NA	NA	NA	NA	NA	NA	NA	NA	NA	NA
NA	NCI_Alpha6_beta4_integrin_ligand_interactions_Main_Pathway	NA	NA	NA	NA	NA	NA	NA	NA	NA	NA	NA	NA	NA
NA	NCI_AlphaE_beta7_integrin_cell_surface_interactions_Main_Pathway	NA	NA	NA	NA	NA	NA	NA	NA	NA	NA	NA	NA	NA
NA	NCI_amb2_Integrin_signaling_Main_Pathway	NA	NA	NA	NA	NA	NA	NA	NA	NA	NA	NA	NA	NA
NA	NCI_Angiopoietin_receptor_Tie2_mediated_signaling_Main_Pathway	NA	NA	NA	NA	NA	NA	NA	NA	NA	NA	NA	NA	NA
NA	NCI_Angiopoietin_receptor_Tie2_mediated_signaling_Pathway_(chemokinesis)	NA	NA	NA	NA	NA	NA	NA	NA	NA	NA	NA	NA	NA
NA	NCI_Angiopoietin_receptor_Tie2_mediated_signaling_Pathway_(negative_regulation_of_caspase_activity)	NA	NA	NA	NA	NA	NA	NA	NA	NA	NA	NA	NA	NA
NA	NCI_Arf6_downstream_Pathway_(cortical_actin_cytoskeleton_organization)	NA	NA	NA	NA	NA	NA	NA	NA	NA	NA	NA	NA	NA
NA	NCI_Arf6_downstream_Pathway_(lamellipodium_assembly)	NA	NA	NA	NA	NA	NA	NA	NA	NA	NA	NA	NA	NA
NA	NCI_Arf6_trafficking_events_Pathway_(calcium_ion_dependent_exocytosis)	NA	NA	NA	NA	NA	NA	NA	NA	NA	NA	NA	NA	NA
NA	NCI_Arf6_trafficking_events_Pathway_(endocytosis)	NA	NA	NA	NA	NA	NA	NA	NA	NA	NA	NA	NA	NA
NA	NCI_Arf6_trafficking_events_Pathway_(regulation_of_calcium_dependent_cell_cell_adhesion)	NA	NA	NA	NA	NA	NA	NA	NA	NA	NA	NA	NA	NA
NA	NCI_Beta1_integrin_cell_surface_interactions_Main_Pathway	NA	NA	NA	NA	NA	NA	NA	NA	NA	NA	NA	NA	NA
NA	NCI_Beta2_integrin_cell_surface_interactions_Main_Pathway	NA	NA	NA	NA	NA	NA	NA	NA	NA	NA	NA	NA	NA
NA	NCI_Beta3_integrin_cell_surface_interactions_Main_Pathway	NA	NA	NA	NA	NA	NA	NA	NA	NA	NA	NA	NA	NA
NA	NCI_Beta5_beta6_beta7_and_beta8_integrin_cell_surface_interactions_Main_Pathway	NA	NA	NA	NA	NA	NA	NA	NA	NA	NA	NA	NA	NA
NA	NCI_Caspase_Cascade_in_Apoptosis_Main_Pathway	NA	NA	NA	NA	NA	NA	NA	NA	NA	NA	NA	NA	NA
NA	NCI_Caspase_Cascade_in_Apoptosis_Pathway_(apoptotic_nuclear_changes)	NA	NA	NA	NA	NA	NA	NA	NA	NA	NA	NA	NA	NA
NA	NCI_CD40_CD40L_signaling_Pathway_(B_cell_affinity_maturation)	NA	NA	NA	NA	NA	NA	NA	NA	NA	NA	NA	NA	NA
NA	NCI_CD40_CD40L_signaling_Pathway_(plasma_cell_differentiation)	NA	NA	NA	NA	NA	NA	NA	NA	NA	NA	NA	NA	NA
NA	NCI_CDC42_signaling_events_Pathway_(cell_motility)	NA	NA	NA	NA	NA	NA	NA	NA	NA	NA	NA	NA	NA
NA	NCI_CDC42_signaling_events_Pathway_(cell_proliferation)	NA	NA	NA	NA	NA	NA	NA	NA	NA	NA	NA	NA	NA
NA	NCI_CDC42_signaling_events_Pathway_(cytokinesis)	NA	NA	NA	NA	NA	NA	NA	NA	NA	NA	NA	NA	NA
NA	NCI_CDC42_signaling_events_Pathway_(establishment_of_cell_polarity)	NA	NA	NA	NA	NA	NA	NA	NA	NA	NA	NA	NA	NA
NA	NCI_CDC42_signaling_events_Pathway_(Pathway_positive_regulation_of_NF_kappaB_transcription_factor_activity_via_CDC42)	NA	NA	NA	NA	NA	NA	NA	NA	NA	NA	NA	NA	NA
NA	NCI_Cellular_roles_of_Anthrax_toxin_Main_Pathway	NA	NA	NA	NA	NA	NA	NA	NA	NA	NA	NA	NA	NA
NA	NCI_Cellular_roles_of_Anthrax_toxin_Pathway_(apoptosis)	NA	NA	NA	NA	NA	NA	NA	NA	NA	NA	NA	NA	NA
NA	NCI_Cellular_roles_of_Anthrax_toxin_Pathway_(inflammatory_response)	NA	NA	NA	NA	NA	NA	NA	NA	NA	NA	NA	NA	NA
NA	NCI_Cellular_roles_of_Anthrax_toxin_Pathway_(macrophage_activation)	NA	NA	NA	NA	NA	NA	NA	NA	NA	NA	NA	NA	NA
NA	NCI_Cellular_roles_of_Anthrax_toxin_Pathway_(MAPKKK_cascade)	NA	NA	NA	NA	NA	NA	NA	NA	NA	NA	NA	NA	NA
NA	NCI_Cellular_roles_of_Anthrax_toxin_Pathway_(monocyte_activation)	NA	NA	NA	NA	NA	NA	NA	NA	NA	NA	NA	NA	NA
NA	NCI_Cellular_roles_of_Anthrax_toxin_Pathway_(necrosis)	NA	NA	NA	NA	NA	NA	NA	NA	NA	NA	NA	NA	NA
NA	NCI_Cellular_roles_of_Anthrax_toxin_Pathway_(negative_regulation_of_macrophage_activation)	NA	NA	NA	NA	NA	NA	NA	NA	NA	NA	NA	NA	NA
NA	NCI_Cellular_roles_of_Anthrax_toxin_Pathway_(negative_regulation_of_myeloid_dendritic_cell_antigen_processing_and_presentation)	NA	NA	NA	NA	NA	NA	NA	NA	NA	NA	NA	NA	NA
NA	NCI_Cellular_roles_of_Anthrax_toxin_Pathway_(negative_regulation_of_phagocytosis)	NA	NA	NA	NA	NA	NA	NA	NA	NA	NA	NA	NA	NA
NA	NCI_Cellular_roles_of_Anthrax_toxin_Pathway_(platelet_activation)	NA	NA	NA	NA	NA	NA	NA	NA	NA	NA	NA	NA	NA
NA	NCI_Cellular_roles_of_Anthrax_toxin_Pathway_(regulation_of_endothelial_cell_proliferation)	NA	NA	NA	NA	NA	NA	NA	NA	NA	NA	NA	NA	NA
NA	NCI_Class_I_PI3K_signaling_events_mediated_by_Akt_Main_Pathway	NA	NA	NA	NA	NA	NA	NA	NA	NA	NA	NA	NA	NA
NA	NCI_Class_I_PI3K_signaling_events_mediated_by_Akt_Pathway_(negative_regulation_of_cell_cycle)	NA	NA	NA	NA	NA	NA	NA	NA	NA	NA	NA	NA	NA
NA	NCI_Class_I_PI3K_signaling_events_Pathway_(cell_survival)	NA	NA	NA	NA	NA	NA	NA	NA	NA	NA	NA	NA	NA
NA	NCI_Coregulation_of_Androgen_receptor_activity_Main_Pathway	NA	NA	NA	NA	NA	NA	NA	NA	NA	NA	NA	NA	NA
NA	NCI_Coregulation_of_Androgen_receptor_activity_Pathway_(cell_proliferation)	NA	NA	NA	NA	NA	NA	NA	NA	NA	NA	NA	NA	NA
NA	NCI_CXCR3_mediated_signaling_events_Pathway_(cAMP_biosynthetic_process)	NA	NA	NA	NA	NA	NA	NA	NA	NA	NA	NA	NA	NA
NA	NCI_CXCR3_mediated_signaling_events_Pathway_(regulation_of_stress_fiber_assembly)	NA	NA	NA	NA	NA	NA	NA	NA	NA	NA	NA	NA	NA
NA	NCI_E_cadherin_signaling_in_keratinocytes_Main_Pathway	NA	NA	NA	NA	NA	NA	NA	NA	NA	NA	NA	NA	NA
NA	NCI_E_cadherin_signaling_in_keratinocytes_Pathway_(actin_cable_formation)	NA	NA	NA	NA	NA	NA	NA	NA	NA	NA	NA	NA	NA
NA	NCI_E_cadherin_signaling_in_keratinocytes_Pathway_(adherens_junction_organization)	NA	NA	NA	NA	NA	NA	NA	NA	NA	NA	NA	NA	NA
NA	NCI_E_cadherin_signaling_in_keratinocytes_Pathway_(apoptosis)	NA	NA	NA	NA	NA	NA	NA	NA	NA	NA	NA	NA	NA
NA	NCI_E_cadherin_signaling_in_keratinocytes_Pathway_(establishment_of_polarity_of_embryonic_epithelium)	NA	NA	NA	NA	NA	NA	NA	NA	NA	NA	NA	NA	NA
NA	NCI_E_cadherin_signaling_in_keratinocytes_Pathway_(keratinocyte_differentiation)	NA	NA	NA	NA	NA	NA	NA	NA	NA	NA	NA	NA	NA
NA	NCI_E_cadherin_signaling_in_the_nascent_adherens_junction_Main_Pathway	NA	NA	NA	NA	NA	NA	NA	NA	NA	NA	NA	NA	NA
NA	NCI_E_cadherin_signaling_in_the_nascent_adherens_junction_Pathway_(regulation_of_actin_nucleation)	NA	NA	NA	NA	NA	NA	NA	NA	NA	NA	NA	NA	NA
NA	NCI_E2F_transcription_factor_network_Main_Pathway	NA	NA	NA	NA	NA	NA	NA	NA	NA	NA	NA	NA	NA
NA	NCI_Effects_of_Botulinum_toxin_Main_Pathway	NA	NA	NA	NA	NA	NA	NA	NA	NA	NA	NA	NA	NA
NA	NCI_EGFR_dependent_Endothelin_signaling_events_Main_Pathway	NA	NA	NA	NA	NA	NA	NA	NA	NA	NA	NA	NA	NA
NA	NCI_Endogenous_TLR_signaling_Main_Pathway	NA	NA	NA	NA	NA	NA	NA	NA	NA	NA	NA	NA	NA
NA	NCI_Endogenous_TLR_signaling_Pathway_(cell_migration)	NA	NA	NA	NA	NA	NA	NA	NA	NA	NA	NA	NA	NA
NA	NCI_Endogenous_TLR_signaling_Pathway_(regulation_of_apoptosis)	NA	NA	NA	NA	NA	NA	NA	NA	NA	NA	NA	NA	NA
NA	NCI_Endogenous_TLR_signaling_Pathway_(regulation_of_cell_matrix_adhesion)	NA	NA	NA	NA	NA	NA	NA	NA	NA	NA	NA	NA	NA
NA	NCI_Endogenous_TLR_signaling_Pathway_(regulation_of_cell_proliferation)	NA	NA	NA	NA	NA	NA	NA	NA	NA	NA	NA	NA	NA
NA	NCI_Endogenous_TLR_signaling_Pathway_(regulation_of_interleukin_1_beta_production)	NA	NA	NA	NA	NA	NA	NA	NA	NA	NA	NA	NA	NA
NA	NCI_Endogenous_TLR_signaling_Pathway_(respiratory_burst_involved_in_inflammatory_response)	NA	NA	NA	NA	NA	NA	NA	NA	NA	NA	NA	NA	NA
NA	NCI_Endothelins_Main_Pathway	NA	NA	NA	NA	NA	NA	NA	NA	NA	NA	NA	NA	NA
NA	NCI_Endothelins_Pathway_(cAMP_biosynthetic_process)	NA	NA	NA	NA	NA	NA	NA	NA	NA	NA	NA	NA	NA
NA	NCI_Endothelins_Pathway_(positive_regulation_of_muscle_contraction)	NA	NA	NA	NA	NA	NA	NA	NA	NA	NA	NA	NA	NA
NA	NCI_EPHA_forward_signaling_Pathway_(proteasomal_ubiquitin_dependent_protein_catabolic_process)	NA	NA	NA	NA	NA	NA	NA	NA	NA	NA	NA	NA	NA
NA	NCI_EPHA2_forward_signaling_Main_Pathway	NA	NA	NA	NA	NA	NA	NA	NA	NA	NA	NA	NA	NA
NA	NCI_Ephrin_A_reverse_signaling_Main_Pathway	NA	NA	NA	NA	NA	NA	NA	NA	NA	NA	NA	NA	NA
NA	NCI_Ephrin_A_reverse_signaling_Pathway_(beta_integrin_mediated_adhesion)	NA	NA	NA	NA	NA	NA	NA	NA	NA	NA	NA	NA	NA
NA	NCI_Ephrin_A_reverse_signaling_Pathway_(MAPKKK_cascade)	NA	NA	NA	NA	NA	NA	NA	NA	NA	NA	NA	NA	NA
NA	NCI_Ephrin_A_reverse_signaling_Pathway_(neuron_projection_morphogenesis)	NA	NA	NA	NA	NA	NA	NA	NA	NA	NA	NA	NA	NA
NA	NCI_EPO_signaling_Pathway_(cell_proliferation)	NA	NA	NA	NA	NA	NA	NA	NA	NA	NA	NA	NA	NA
NA	NCI_ErbB_receptor_signaling_network_Main_Pathway	NA	NA	NA	NA	NA	NA	NA	NA	NA	NA	NA	NA	NA
NA	NCI_ErbB1_downstream_signaling_Pathway_(cytoskeleton_organization)	NA	NA	NA	NA	NA	NA	NA	NA	NA	NA	NA	NA	NA
NA	NCI_ErbB4_signaling_events_Main_Pathway	NA	NA	NA	NA	NA	NA	NA	NA	NA	NA	NA	NA	NA
NA	NCI_ErbB4_signaling_events_Pathway_(apoptosis)	NA	NA	NA	NA	NA	NA	NA	NA	NA	NA	NA	NA	NA
NA	NCI_ErbB4_signaling_events_Pathway_(axon_guidance)	NA	NA	NA	NA	NA	NA	NA	NA	NA	NA	NA	NA	NA
NA	NCI_ErbB4_signaling_events_Pathway_(cell_proliferation)	NA	NA	NA	NA	NA	NA	NA	NA	NA	NA	NA	NA	NA
NA	NCI_ErbB4_signaling_events_Pathway_(chemotaxis)	NA	NA	NA	NA	NA	NA	NA	NA	NA	NA	NA	NA	NA
NA	NCI_ErbB4_signaling_events_Pathway_(dendrite_morphogenesis)	NA	NA	NA	NA	NA	NA	NA	NA	NA	NA	NA	NA	NA
NA	NCI_ErbB4_signaling_events_Pathway_(epithelial_cell_differentiation)	NA	NA	NA	NA	NA	NA	NA	NA	NA	NA	NA	NA	NA
NA	NCI_ErbB4_signaling_events_Pathway_(glial_cell_differentiation)	NA	NA	NA	NA	NA	NA	NA	NA	NA	NA	NA	NA	NA
NA	NCI_ErbB4_signaling_events_Pathway_(heart_development)	NA	NA	NA	NA	NA	NA	NA	NA	NA	NA	NA	NA	NA
NA	NCI_ErbB4_signaling_events_Pathway_(neural_crest_cell_migration)	NA	NA	NA	NA	NA	NA	NA	NA	NA	NA	NA	NA	NA
NA	NCI_FAS_CD95_signaling_Main_Pathway	NA	NA	NA	NA	NA	NA	NA	NA	NA	NA	NA	NA	NA
NA	NCI_FAS_CD95_signaling_Pathway_(necroptosis)	NA	NA	NA	NA	NA	NA	NA	NA	NA	NA	NA	NA	NA
NA	NCI_FAS_CD95_signaling_Pathway_(neuron_projection_development)	NA	NA	NA	NA	NA	NA	NA	NA	NA	NA	NA	NA	NA
NA	NCI_Glypican_1_network_Main_Pathway	NA	NA	NA	NA	NA	NA	NA	NA	NA	NA	NA	NA	NA
NA	NCI_Glypican_1_network_Pathway_(BMP_signaling_pathway)	NA	NA	NA	NA	NA	NA	NA	NA	NA	NA	NA	NA	NA
NA	NCI_Glypican_1_network_Pathway_(cell_growth)	NA	NA	NA	NA	NA	NA	NA	NA	NA	NA	NA	NA	NA
NA	NCI_Glypican_1_network_Pathway_(fibroblast_growth_factor_receptor_signaling_pathway)	NA	NA	NA	NA	NA	NA	NA	NA	NA	NA	NA	NA	NA
NA	NCI_IFN_gamma_Main_Pathway	NA	NA	NA	NA	NA	NA	NA	NA	NA	NA	NA	NA	NA
NA	NCI_IFN_gamma_Pathway_(Antibacterial_Response)	NA	NA	NA	NA	NA	NA	NA	NA	NA	NA	NA	NA	NA
NA	NCI_IFN_gamma_Pathway_(antigen_processing_and_presentation_of_peptide_antigen_via_MHC_class_I)	NA	NA	NA	NA	NA	NA	NA	NA	NA	NA	NA	NA	NA
NA	NCI_IFN_gamma_Pathway_(antigen_processing_and_presentation_of_peptide_antigen_via_MHC_class_II)	NA	NA	NA	NA	NA	NA	NA	NA	NA	NA	NA	NA	NA
NA	NCI_IFN_gamma_Pathway_(Antiviral_Response)	NA	NA	NA	NA	NA	NA	NA	NA	NA	NA	NA	NA	NA
NA	NCI_IFN_gamma_Pathway_(apoptosis)	NA	NA	NA	NA	NA	NA	NA	NA	NA	NA	NA	NA	NA
NA	NCI_IFN_gamma_Pathway_(Immunoregulation)	NA	NA	NA	NA	NA	NA	NA	NA	NA	NA	NA	NA	NA
NA	NCI_IFN_gamma_Pathway_(negative_regulation_of_cell_growth)	NA	NA	NA	NA	NA	NA	NA	NA	NA	NA	NA	NA	NA
NA	NCI_IGF1_Pathway_(positive_regulation_of_MAPKKK_cascade)	NA	NA	NA	NA	NA	NA	NA	NA	NA	NA	NA	NA	NA
NA	NCI_IL12_signaling_mediated_by_STAT4_Main_Pathway	NA	NA	NA	NA	NA	NA	NA	NA	NA	NA	NA	NA	NA
NA	NCI_IL12_signaling_mediated_by_STAT4_Pathway_(natural_killer_cell_mediated_cytotoxicity)	NA	NA	NA	NA	NA	NA	NA	NA	NA	NA	NA	NA	NA
NA	NCI_IL12_signaling_mediated_by_STAT4_Pathway_(T_helper_1_cell_differentiation)	NA	NA	NA	NA	NA	NA	NA	NA	NA	NA	NA	NA	NA
NA	NCI_IL12_signaling_mediated_by_STAT4_Pathway_(T_helper_2_cell_differentiation)	NA	NA	NA	NA	NA	NA	NA	NA	NA	NA	NA	NA	NA
NA	NCI_IL27_mediated_signaling_events_Main_Pathway	NA	NA	NA	NA	NA	NA	NA	NA	NA	NA	NA	NA	NA
NA	NCI_IL27_mediated_signaling_events_Pathway_(cytokine_production_during_immune_response)	NA	NA	NA	NA	NA	NA	NA	NA	NA	NA	NA	NA	NA
NA	NCI_IL27_mediated_signaling_events_Pathway_(MAPKKK_cascade)	NA	NA	NA	NA	NA	NA	NA	NA	NA	NA	NA	NA	NA
NA	NCI_IL27_mediated_signaling_events_Pathway_(mast_cell_activation)	NA	NA	NA	NA	NA	NA	NA	NA	NA	NA	NA	NA	NA
NA	NCI_IL27_mediated_signaling_events_Pathway_(positive_regulation_of_mast_cell_cytokine_production)	NA	NA	NA	NA	NA	NA	NA	NA	NA	NA	NA	NA	NA
NA	NCI_IL27_mediated_signaling_events_Pathway_(positive_regulation_of_T_cell_mediated_cytotoxicity)	NA	NA	NA	NA	NA	NA	NA	NA	NA	NA	NA	NA	NA
NA	NCI_IL27_mediated_signaling_events_Pathway_(T_cell_proliferation)	NA	NA	NA	NA	NA	NA	NA	NA	NA	NA	NA	NA	NA
NA	NCI_IL27_mediated_signaling_events_Pathway_(T_cell_proliferation_during_immune_response)	NA	NA	NA	NA	NA	NA	NA	NA	NA	NA	NA	NA	NA
NA	NCI_IL27_mediated_signaling_events_Pathway_(T_helper_2_cell_differentiation)	NA	NA	NA	NA	NA	NA	NA	NA	NA	NA	NA	NA	NA
NA	NCI_IL5_mediated_signaling_events_Main_Pathway	NA	NA	NA	NA	NA	NA	NA	NA	NA	NA	NA	NA	NA
NA	NCI_IL5_mediated_signaling_events_Pathway_(proteasomal_ubiquitin_dependent_protein_catabolic_process)	NA	NA	NA	NA	NA	NA	NA	NA	NA	NA	NA	NA	NA
NA	NCI_IL5_mediated_signaling_events_Pathway_(regulation_of_isotype_switching_to_IgG_isotypes)	NA	NA	NA	NA	NA	NA	NA	NA	NA	NA	NA	NA	NA
NA	NCI_IL6_mediated_signaling_events_Pathway_(cell_cycle_arrest)	NA	NA	NA	NA	NA	NA	NA	NA	NA	NA	NA	NA	NA
NA	NCI_IL6_mediated_signaling_events_Pathway_(cell_survival)	NA	NA	NA	NA	NA	NA	NA	NA	NA	NA	NA	NA	NA
NA	NCI_IL6_mediated_signaling_events_Pathway_(macrophage_differentiation)	NA	NA	NA	NA	NA	NA	NA	NA	NA	NA	NA	NA	NA
NA	NCI_Insulin_mediated_glucose_transport_Main_Pathway	NA	NA	NA	NA	NA	NA	NA	NA	NA	NA	NA	NA	NA
NA	NCI_Insulin_Pathway_Pathway_(negative_regulation_of_MAPKKK_cascade)	NA	NA	NA	NA	NA	NA	NA	NA	NA	NA	NA	NA	NA
NA	NCI_Integrin_linked_kinase_signaling_Main_Pathway	NA	NA	NA	NA	NA	NA	NA	NA	NA	NA	NA	NA	NA
NA	NCI_Integrins_in_angiogenesis_Main_Pathway	NA	NA	NA	NA	NA	NA	NA	NA	NA	NA	NA	NA	NA
NA	NCI_Integrins_in_angiogenesis_Pathway_(angiogenesis)	NA	NA	NA	NA	NA	NA	NA	NA	NA	NA	NA	NA	NA
NA	NCI_Internalization_of_ErbB1_Main_Pathway	NA	NA	NA	NA	NA	NA	NA	NA	NA	NA	NA	NA	NA
NA	NCI_Lissencephaly_gene_LIS1_in_neuronal_migration_and_development_Pathway_(microtubule_based_movement)	NA	NA	NA	NA	NA	NA	NA	NA	NA	NA	NA	NA	NA
NA	NCI_N_cadherin_signaling_events_Main_Pathway	NA	NA	NA	NA	NA	NA	NA	NA	NA	NA	NA	NA	NA
NA	NCI_N_cadherin_signaling_events_Pathway_(actin_filament_polymerization)	NA	NA	NA	NA	NA	NA	NA	NA	NA	NA	NA	NA	NA
NA	NCI_N_cadherin_signaling_events_Pathway_(regulation_of_cell_cell_adhesion)	NA	NA	NA	NA	NA	NA	NA	NA	NA	NA	NA	NA	NA
NA	NCI_N_cadherin_signaling_events_Pathway_(regulation_of_synapse_organization)	NA	NA	NA	NA	NA	NA	NA	NA	NA	NA	NA	NA	NA
NA	NCI_Neurotrophic_factor_mediated_Trk_receptor_signaling_Pathway_(axon_guidance)	NA	NA	NA	NA	NA	NA	NA	NA	NA	NA	NA	NA	NA
NA	NCI_Neurotrophic_factor_mediated_Trk_receptor_signaling_Pathway_(MAPKKK_cascade)	NA	NA	NA	NA	NA	NA	NA	NA	NA	NA	NA	NA	NA
NA	NCI_Nongenotropic_Androgen_signaling_Pathway_(actin_cytoskeleton_reorganization)	NA	NA	NA	NA	NA	NA	NA	NA	NA	NA	NA	NA	NA
NA	NCI_Notch_mediated_HES_HEY_network_Pathway_(Pathway_degradation_of_HEY1)	NA	NA	NA	NA	NA	NA	NA	NA	NA	NA	NA	NA	NA
NA	NCI_Notch_signaling_Main_Pathway	NA	NA	NA	NA	NA	NA	NA	NA	NA	NA	NA	NA	NA
NA	NCI_Notch_signaling_Pathway_(Bergmann_glial_cell_differentiation)	NA	NA	NA	NA	NA	NA	NA	NA	NA	NA	NA	NA	NA
NA	NCI_Notch_signaling_Pathway_(oligodendrocyte_development)	NA	NA	NA	NA	NA	NA	NA	NA	NA	NA	NA	NA	NA
NA	NCI_Osteopontin_mediated_events_Main_Pathway	NA	NA	NA	NA	NA	NA	NA	NA	NA	NA	NA	NA	NA
NA	NCI_Osteopontin_mediated_events_Pathway_(bone_resorption)	NA	NA	NA	NA	NA	NA	NA	NA	NA	NA	NA	NA	NA
NA	NCI_Osteopontin_mediated_events_Pathway_(ruffle_organization)	NA	NA	NA	NA	NA	NA	NA	NA	NA	NA	NA	NA	NA
NA	NCI_p38_signaling_mediated_by_MAPKAP_kinases_Main_Pathway	NA	NA	NA	NA	NA	NA	NA	NA	NA	NA	NA	NA	NA
NA	NCI_p38_signaling_mediated_by_MAPKAP_kinases_Pathway_(regulation_of_mRNA_stability)	NA	NA	NA	NA	NA	NA	NA	NA	NA	NA	NA	NA	NA
NA	NCI_p53_Main_Pathway	NA	NA	NA	NA	NA	NA	NA	NA	NA	NA	NA	NA	NA
NA	NCI_p53_Pathway_(apoptosis)	NA	NA	NA	NA	NA	NA	NA	NA	NA	NA	NA	NA	NA
NA	NCI_p53_Pathway_(proteasomal_ubiquitin_dependent_protein_catabolic_process)	NA	NA	NA	NA	NA	NA	NA	NA	NA	NA	NA	NA	NA
NA	NCI_p73_transcription_factor_network_Main_Pathway	NA	NA	NA	NA	NA	NA	NA	NA	NA	NA	NA	NA	NA
NA	NCI_p73_transcription_factor_network_Pathway_(apoptosis)	NA	NA	NA	NA	NA	NA	NA	NA	NA	NA	NA	NA	NA
NA	NCI_Plexin_D1_Signaling_Pathway_(receptor_recycling)	NA	NA	NA	NA	NA	NA	NA	NA	NA	NA	NA	NA	NA
NA	NCI_PLK3_signaling_events_Main_Pathway	NA	NA	NA	NA	NA	NA	NA	NA	NA	NA	NA	NA	NA
NA	NCI_Posttranslational_regulation_of_adherens_junction_stability_and_dissassembly_Main_Pathway	NA	NA	NA	NA	NA	NA	NA	NA	NA	NA	NA	NA	NA
NA	NCI_Regulation_of_Androgen_receptor_activity_Main_Pathway	NA	NA	NA	NA	NA	NA	NA	NA	NA	NA	NA	NA	NA
NA	NCI_Regulation_of_Androgen_receptor_activity_Pathway_(cell_proliferation)	NA	NA	NA	NA	NA	NA	NA	NA	NA	NA	NA	NA	NA
NA	NCI_Regulation_of_CDC42_activity_Main_Pathway	NA	NA	NA	NA	NA	NA	NA	NA	NA	NA	NA	NA	NA
NA	NCI_Regulation_of_p38_alpha_and_p38_beta_Main_Pathway	NA	NA	NA	NA	NA	NA	NA	NA	NA	NA	NA	NA	NA
NA	NCI_Regulation_of_p38_alpha_and_p38_beta_Pathway_(positive_regulation_of_innate_immune_response)	NA	NA	NA	NA	NA	NA	NA	NA	NA	NA	NA	NA	NA
NA	NCI_Regulation_of_RAC1_activity_Main_Pathway	NA	NA	NA	NA	NA	NA	NA	NA	NA	NA	NA	NA	NA
NA	NCI_Regulation_of_RhoA_activity_Main_Pathway	NA	NA	NA	NA	NA	NA	NA	NA	NA	NA	NA	NA	NA
NA	NCI_Regulation_of_Telomerase_Pathway_(cell_cycle)	NA	NA	NA	NA	NA	NA	NA	NA	NA	NA	NA	NA	NA
NA	NCI_Role_of_Calcineurin_dependent_NFAT_signaling_in_lymphocytes_Pathway_(apoptosis)	NA	NA	NA	NA	NA	NA	NA	NA	NA	NA	NA	NA	NA
NA	NCI_S1P1_Pathway_(receptor_internalization)	NA	NA	NA	NA	NA	NA	NA	NA	NA	NA	NA	NA	NA
NA	NCI_SHP2_signaling_Main_Pathway	NA	NA	NA	NA	NA	NA	NA	NA	NA	NA	NA	NA	NA
NA	NCI_Signaling_events_mediated_by_HDAC_Class_III_Main_Pathway	NA	NA	NA	NA	NA	NA	NA	NA	NA	NA	NA	NA	NA
NA	NCI_Signaling_events_mediated_by_HDAC_Class_III_Pathway_(regulation_of_S_phase_of_mitotic_cell_cycle)	NA	NA	NA	NA	NA	NA	NA	NA	NA	NA	NA	NA	NA
NA	NCI_Signaling_events_mediated_by_PRL_Pathway_(cell_motility)	NA	NA	NA	NA	NA	NA	NA	NA	NA	NA	NA	NA	NA
NA	NCI_Signaling_events_mediated_by_PRL_Pathway_(mitosis)	NA	NA	NA	NA	NA	NA	NA	NA	NA	NA	NA	NA	NA
NA	NCI_Signaling_events_mediated_by_Stem_cell_factor_receptor_c_Kit__Main_Pathway	NA	NA	NA	NA	NA	NA	NA	NA	NA	NA	NA	NA	NA
NA	NCI_Signaling_events_mediated_by_Stem_cell_factor_receptor_c_Kit__Pathway_(actin_filament_polymerization)	NA	NA	NA	NA	NA	NA	NA	NA	NA	NA	NA	NA	NA
NA	NCI_Signaling_events_mediated_by_Stem_cell_factor_receptor_c_Kit__Pathway_(cell_migration)	NA	NA	NA	NA	NA	NA	NA	NA	NA	NA	NA	NA	NA
NA	NCI_Signaling_events_mediated_by_Stem_cell_factor_receptor_c_Kit__Pathway_(cell_motility)	NA	NA	NA	NA	NA	NA	NA	NA	NA	NA	NA	NA	NA
NA	NCI_Signaling_events_mediated_by_Stem_cell_factor_receptor_c_Kit__Pathway_(cell_proliferation)	NA	NA	NA	NA	NA	NA	NA	NA	NA	NA	NA	NA	NA
NA	NCI_Signaling_events_mediated_by_Stem_cell_factor_receptor_c_Kit__Pathway_(megakaryocyte_differentiation)	NA	NA	NA	NA	NA	NA	NA	NA	NA	NA	NA	NA	NA
NA	NCI_Signaling_events_mediated_by_Stem_cell_factor_receptor_c_Kit__Pathway_(Pathway_positive_regulation_of_transcription_via_MAPK3)	NA	NA	NA	NA	NA	NA	NA	NA	NA	NA	NA	NA	NA
NA	NCI_Signaling_events_mediated_by_Stem_cell_factor_receptor_c_Kit__Pathway_(positive_regulation_of_cell_proliferation)	NA	NA	NA	NA	NA	NA	NA	NA	NA	NA	NA	NA	NA
NA	NCI_Signaling_events_mediated_by_Stem_cell_factor_receptor_c_Kit__Pathway_(response_to_radiation)	NA	NA	NA	NA	NA	NA	NA	NA	NA	NA	NA	NA	NA
NA	NCI_Signaling_events_mediated_by_VEGFR1_and_VEGFR2_Pathway_(cell_proliferation)	NA	NA	NA	NA	NA	NA	NA	NA	NA	NA	NA	NA	NA
NA	NCI_Signaling_events_mediated_by_VEGFR1_and_VEGFR2_Pathway_(stress_fiber_assembly)	NA	NA	NA	NA	NA	NA	NA	NA	NA	NA	NA	NA	NA
NA	NCI_Signaling_events_regulated_by_Ret_tyrosine_kinase_Main_Pathway	NA	NA	NA	NA	NA	NA	NA	NA	NA	NA	NA	NA	NA
NA	NCI_Signaling_events_regulated_by_Ret_tyrosine_kinase_Pathway_(activation_of_MAPKK_activity)	NA	NA	NA	NA	NA	NA	NA	NA	NA	NA	NA	NA	NA
NA	NCI_Signaling_events_regulated_by_Ret_tyrosine_kinase_Pathway_(lamellipodium_assembly)	NA	NA	NA	NA	NA	NA	NA	NA	NA	NA	NA	NA	NA
NA	NCI_Signaling_events_regulated_by_Ret_tyrosine_kinase_Pathway_(MAPKKK_cascade)	NA	NA	NA	NA	NA	NA	NA	NA	NA	NA	NA	NA	NA
NA	NCI_Signaling_events_regulated_by_Ret_tyrosine_kinase_Pathway_(tube_development)	NA	NA	NA	NA	NA	NA	NA	NA	NA	NA	NA	NA	NA
NA	NCI_Signaling_mediated_by_p38_alpha_and_p38_beta_Main_Pathway	NA	NA	NA	NA	NA	NA	NA	NA	NA	NA	NA	NA	NA
NA	NCI_Stabilization_and_expansion_of_the_E_cadherin_adherens_junction_Pathway_(actin_cytoskeleton_organization)	NA	NA	NA	NA	NA	NA	NA	NA	NA	NA	NA	NA	NA
NA	NCI_Stabilization_and_expansion_of_the_E_cadherin_adherens_junction_Pathway_(cortical_microtubule_organization)	NA	NA	NA	NA	NA	NA	NA	NA	NA	NA	NA	NA	NA
NA	NCI_Stabilization_and_expansion_of_the_E_cadherin_adherens_junction_Pathway_(epithelial_cell_differentiation)	NA	NA	NA	NA	NA	NA	NA	NA	NA	NA	NA	NA	NA
NA	NCI_Stabilization_and_expansion_of_the_E_cadherin_adherens_junction_Pathway_(regulation_of_calcium_dependent_cell_cell_adhesion)	NA	NA	NA	NA	NA	NA	NA	NA	NA	NA	NA	NA	NA
NA	NCI_Stabilization_and_expansion_of_the_E_cadherin_adherens_junction_Pathway_(Wnt_receptor_signaling_pathway)	NA	NA	NA	NA	NA	NA	NA	NA	NA	NA	NA	NA	NA
NA	NCI_Syndecan_1_mediated_signaling_events_Main_Pathway	NA	NA	NA	NA	NA	NA	NA	NA	NA	NA	NA	NA	NA
NA	NCI_Syndecan_1_mediated_signaling_events_Pathway_(homophilic_cell_adhesion)	NA	NA	NA	NA	NA	NA	NA	NA	NA	NA	NA	NA	NA
NA	NCI_Syndecan_1_mediated_signaling_events_Pathway_(positive_regulation_of_cell_migration)	NA	NA	NA	NA	NA	NA	NA	NA	NA	NA	NA	NA	NA
NA	NCI_Syndecan_1_mediated_signaling_events_Pathway_(Tumor_Cell_Invasion)	NA	NA	NA	NA	NA	NA	NA	NA	NA	NA	NA	NA	NA
NA	NCI_Syndecan_2_mediated_signaling_events_Pathway_(dendrite_morphogenesis)	NA	NA	NA	NA	NA	NA	NA	NA	NA	NA	NA	NA	NA
NA	NCI_Syndecan_2_mediated_signaling_events_Pathway_(determination_of_left_right_symmetry)	NA	NA	NA	NA	NA	NA	NA	NA	NA	NA	NA	NA	NA
NA	NCI_Syndecan_3_mediated_signaling_events_Pathway_(limb_bud_formation)	NA	NA	NA	NA	NA	NA	NA	NA	NA	NA	NA	NA	NA
NA	NCI_TGF_beta_receptor_signaling_Main_Pathway	NA	NA	NA	NA	NA	NA	NA	NA	NA	NA	NA	NA	NA
NA	NCI_Thromboxane_A2_receptor_signaling_Pathway_(chemotaxis)	NA	NA	NA	NA	NA	NA	NA	NA	NA	NA	NA	NA	NA
NA	NCI_Thromboxane_A2_receptor_signaling_Pathway_(MAPKKK_cascade)	NA	NA	NA	NA	NA	NA	NA	NA	NA	NA	NA	NA	NA
NA	NCI_Thromboxane_A2_receptor_signaling_Pathway_(muscle_contraction)	NA	NA	NA	NA	NA	NA	NA	NA	NA	NA	NA	NA	NA
NA	NCI_Trk_receptor_signaling_mediated_by_the_MAPK_Pathway_(neuron_projection_morphogenesis)	NA	NA	NA	NA	NA	NA	NA	NA	NA	NA	NA	NA	NA
NA	NCI_Urokinase_type_plasminogen_activator_uPA_and_uPAR_mediated_signaling_Main_Pathway	NA	NA	NA	NA	NA	NA	NA	NA	NA	NA	NA	NA	NA
NA	NCI_Urokinase_type_plasminogen_activator_uPA_and_uPAR_mediated_signaling_Pathway_(cell_proliferation)	NA	NA	NA	NA	NA	NA	NA	NA	NA	NA	NA	NA	NA
NA	NCI_Validated_transcriptional_targets_of_TAp63_isoforms_Pathway_(Metastasis)	NA	NA	NA	NA	NA	NA	NA	NA	NA	NA	NA	NA	NA
NA	NCI_Validated_transcriptional_targets_of_TAp63_isoforms_Pathway_(Pathway_degradation_of_TP63)	NA	NA	NA	NA	NA	NA	NA	NA	NA	NA	NA	NA	NA
NA	NCI_VEGF_and_VEGFR_signaling_network_Main_Pathway	NA	NA	NA	NA	NA	NA	NA	NA	NA	NA	NA	NA	NA
NA	NCI_VEGFR1_specific_signals_Main_Pathway	NA	NA	NA	NA	NA	NA	NA	NA	NA	NA	NA	NA	NA
NA	NCI_VEGFR3_signaling_in_lymphatic_endothelium_Main_Pathway	NA	NA	NA	NA	NA	NA	NA	NA	NA	NA	NA	NA	NA
NA	NCI_VEGFR3_signaling_in_lymphatic_endothelium_Pathway_(cell_proliferation)	NA	NA	NA	NA	NA	NA	NA	NA	NA	NA	NA	NA	NA
NA	NGF_Pathway_Gene_Expression_via_MYC_ELK1_CREB3_NFKB2	NA	NA	NA	NA	NA	NA	NA	NA	NA	NA	NA	NA	NA
NA	Notch_Signaling_Pathway	NA	NA	NA	NA	NA	NA	NA	NA	NA	NA	NA	NA	NA
NA	Notch_Signaling_Pathway_gamma_Secretase	NA	NA	NA	NA	NA	NA	NA	NA	NA	NA	NA	NA	NA
NA	Notch_Signaling_Pathway_Gene_Expression_Chromatin_Remodeling_via_RBPJ	NA	NA	NA	NA	NA	NA	NA	NA	NA	NA	NA	NA	NA
NA	Notch_Signaling_Pathway_Transcription_of_Target_Genes_Hairy_E-SpI_via_RBPJ	NA	NA	NA	NA	NA	NA	NA	NA	NA	NA	NA	NA	NA
NA	p38_Signaling_Pathway	NA	NA	NA	NA	NA	NA	NA	NA	NA	NA	NA	NA	NA
NA	PAK_Pathway	NA	NA	NA	NA	NA	NA	NA	NA	NA	NA	NA	NA	NA
NA	PAK_Pathway_Actin_Organization	NA	NA	NA	NA	NA	NA	NA	NA	NA	NA	NA	NA	NA
NA	PAK_Pathway_Cell_Survival	NA	NA	NA	NA	NA	NA	NA	NA	NA	NA	NA	NA	NA
NA	PAK_Pathway_Lamelliopodia_and_Filopodia_Outgrowth	NA	NA	NA	NA	NA	NA	NA	NA	NA	NA	NA	NA	NA
NA	PTEN_Pathway	NA	NA	NA	NA	NA	NA	NA	NA	NA	NA	NA	NA	NA
NA	PTEN_Pathway_Adhesion_or_Migration	NA	NA	NA	NA	NA	NA	NA	NA	NA	NA	NA	NA	NA
NA	PTEN_Pathway_Proliferation_CyclinA2_Geminin_AuroraA_PLK1	NA	NA	NA	NA	NA	NA	NA	NA	NA	NA	NA	NA	NA
NA	PTEN_Pathway_Senescence_Ets2_p16	NA	NA	NA	NA	NA	NA	NA	NA	NA	NA	NA	NA	NA
NA	Ras_Pathway	NA	NA	NA	NA	NA	NA	NA	NA	NA	NA	NA	NA	NA
NA	Ras_Pathway_Cell-Cell_Junctions	NA	NA	NA	NA	NA	NA	NA	NA	NA	NA	NA	NA	NA
NA	Ras_Pathway_Golgi_Trafficking_and_Vesicle_Formation	NA	NA	NA	NA	NA	NA	NA	NA	NA	NA	NA	NA	NA
NA	Ras_Pathway_Increased_T-cell_Adhesion	NA	NA	NA	NA	NA	NA	NA	NA	NA	NA	NA	NA	NA
NA	reactome_A_third_proteolytic_cleavage_releases_NICD_Main_Pathway	NA	NA	NA	NA	NA	NA	NA	NA	NA	NA	NA	NA	NA
NA	reactome_Abacavir_metabolism_Main_Pathway	NA	NA	NA	NA	NA	NA	NA	NA	NA	NA	NA	NA	NA
NA	reactome_Abacavir_transmembrane_transport_Main_Pathway	NA	NA	NA	NA	NA	NA	NA	NA	NA	NA	NA	NA	NA
NA	reactome_ABCA_transporters_in_lipid_homeostasis_Main_Pathway	NA	NA	NA	NA	NA	NA	NA	NA	NA	NA	NA	NA	NA
NA	reactome_Acetylcholine_Neurotransmitter_Release_Cycle_Main_Pathway	NA	NA	NA	NA	NA	NA	NA	NA	NA	NA	NA	NA	NA
NA	reactome_Activation_of_BAD_and_translocation_to_mitochondria_Main_Pathway	NA	NA	NA	NA	NA	NA	NA	NA	NA	NA	NA	NA	NA
NA	reactome_Activation_of_C3_and_C5_Main_Pathway	NA	NA	NA	NA	NA	NA	NA	NA	NA	NA	NA	NA	NA
NA	reactome_Activation_of_Matrix_Metalloproteinases_Main_Pathway	NA	NA	NA	NA	NA	NA	NA	NA	NA	NA	NA	NA	NA
NA	reactome_Activation_of_RAS_in_B_cells_Main_Pathway	NA	NA	NA	NA	NA	NA	NA	NA	NA	NA	NA	NA	NA
NA	reactome_Acyl_chain_remodeling_of_DAG_and_TAG_Main_Pathway	NA	NA	NA	NA	NA	NA	NA	NA	NA	NA	NA	NA	NA
NA	reactome_Acyl_chain_remodelling_of_PC_Main_Pathway	NA	NA	NA	NA	NA	NA	NA	NA	NA	NA	NA	NA	NA
NA	reactome_Acyl_chain_remodelling_of_PI_Main_Pathway	NA	NA	NA	NA	NA	NA	NA	NA	NA	NA	NA	NA	NA
NA	reactome_Adherens_junctions_interactions_Main_Pathway	NA	NA	NA	NA	NA	NA	NA	NA	NA	NA	NA	NA	NA
NA	reactome_Adrenaline_signalling_through_Alpha_2_adrenergic_receptor_Main_Pathway	NA	NA	NA	NA	NA	NA	NA	NA	NA	NA	NA	NA	NA
NA	reactome_Adrenoceptors_Main_Pathway	NA	NA	NA	NA	NA	NA	NA	NA	NA	NA	NA	NA	NA
NA	reactome_Alternative_complement_activation_Main_Pathway	NA	NA	NA	NA	NA	NA	NA	NA	NA	NA	NA	NA	NA
NA	reactome_Amine_compound_SLC_transporters_Main_Pathway	NA	NA	NA	NA	NA	NA	NA	NA	NA	NA	NA	NA	NA
NA	reactome_Amino_acid_and_oligopeptide_SLC_transporters_Main_Pathway	NA	NA	NA	NA	NA	NA	NA	NA	NA	NA	NA	NA	NA
NA	reactome_Amino_acid_transport_across_the_plasma_membrane_Main_Pathway	NA	NA	NA	NA	NA	NA	NA	NA	NA	NA	NA	NA	NA
NA	reactome_Anchoring_fibril_formation_Main_Pathway	NA	NA	NA	NA	NA	NA	NA	NA	NA	NA	NA	NA	NA
NA	reactome_Androgen_biosynthesis_Main_Pathway	NA	NA	NA	NA	NA	NA	NA	NA	NA	NA	NA	NA	NA
NA	reactome_Antigen_Presentation_Folding_assembly_and_peptide_loading_of_class_I_MHC_Main_Pathway	NA	NA	NA	NA	NA	NA	NA	NA	NA	NA	NA	NA	NA
NA	reactome_Apoptotic_cleavage_of_cell_adhesion_proteins_Main_Pathway	NA	NA	NA	NA	NA	NA	NA	NA	NA	NA	NA	NA	NA
NA	reactome_Arachidonate_production_from_DAG_Main_Pathway	NA	NA	NA	NA	NA	NA	NA	NA	NA	NA	NA	NA	NA
NA	reactome_Asymmetric_localization_of_PCP_proteins_Main_Pathway	NA	NA	NA	NA	NA	NA	NA	NA	NA	NA	NA	NA	NA
NA	reactome_Beta_oxidation_of_very_long_chain_fatty_acids_Main_Pathway	NA	NA	NA	NA	NA	NA	NA	NA	NA	NA	NA	NA	NA
NA	reactome_Bile_salt_and_organic_anion_SLC_transporters_Main_Pathway	NA	NA	NA	NA	NA	NA	NA	NA	NA	NA	NA	NA	NA
NA	reactome_Binding_and_entry_of_HIV_virion_Main_Pathway	NA	NA	NA	NA	NA	NA	NA	NA	NA	NA	NA	NA	NA
NA	reactome_Ca_activated_K_channels_Main_Pathway	NA	NA	NA	NA	NA	NA	NA	NA	NA	NA	NA	NA	NA
NA	reactome_Caspase_mediated_cleavage_of_cytoskeletal_proteins_Main_Pathway	NA	NA	NA	NA	NA	NA	NA	NA	NA	NA	NA	NA	NA
NA	reactome_cGMP_effects_Main_Pathway	NA	NA	NA	NA	NA	NA	NA	NA	NA	NA	NA	NA	NA
NA	reactome_Chondroitin_sulfate_biosynthesis_Main_Pathway	NA	NA	NA	NA	NA	NA	NA	NA	NA	NA	NA	NA	NA
NA	reactome_Circadian_Clock_Main_Pathway	NA	NA	NA	NA	NA	NA	NA	NA	NA	NA	NA	NA	NA
NA	reactome_Class_II_GLUTs_Main_Pathway	NA	NA	NA	NA	NA	NA	NA	NA	NA	NA	NA	NA	NA
NA	reactome_Classical_Kir_channels_Main_Pathway	NA	NA	NA	NA	NA	NA	NA	NA	NA	NA	NA	NA	NA
NA	reactome_Clathrin_derived_vesicle_budding_Main_Pathway	NA	NA	NA	NA	NA	NA	NA	NA	NA	NA	NA	NA	NA
NA	reactome_Collagen_biosynthesis_and_modifying_enzymes_Main_Pathway	NA	NA	NA	NA	NA	NA	NA	NA	NA	NA	NA	NA	NA
NA	reactome_Collagen_degradation_Main_Pathway	NA	NA	NA	NA	NA	NA	NA	NA	NA	NA	NA	NA	NA
NA	reactome_Constitutive_Signaling_by_NOTCH1_t_7_9_NOTCH1_M1580_K2555_Translocation_Mutant_Main_Pathway	NA	NA	NA	NA	NA	NA	NA	NA	NA	NA	NA	NA	NA
NA	reactome_Cross_presentation_of_particulate_exogenous_antigens_phagosomes__Main_Pathway	NA	NA	NA	NA	NA	NA	NA	NA	NA	NA	NA	NA	NA
NA	reactome_Crosslinking_of_collagen_fibrils_Main_Pathway	NA	NA	NA	NA	NA	NA	NA	NA	NA	NA	NA	NA	NA
NA	reactome_CS_DS_degradation_Main_Pathway	NA	NA	NA	NA	NA	NA	NA	NA	NA	NA	NA	NA	NA
NA	reactome_CTLA4_inhibitory_signaling_Main_Pathway	NA	NA	NA	NA	NA	NA	NA	NA	NA	NA	NA	NA	NA
NA	reactome_Cyclin_D_associated_events_in_G1_Main_Pathway	NA	NA	NA	NA	NA	NA	NA	NA	NA	NA	NA	NA	NA
NA	reactome_CYP2E1_reactions_Main_Pathway	NA	NA	NA	NA	NA	NA	NA	NA	NA	NA	NA	NA	NA
NA	reactome_DAG_and_IP3_signaling_Main_Pathway	NA	NA	NA	NA	NA	NA	NA	NA	NA	NA	NA	NA	NA
NA	reactome_Degradation_of_the_extracellular_matrix_Main_Pathway	NA	NA	NA	NA	NA	NA	NA	NA	NA	NA	NA	NA	NA
NA	reactome_Digestion_of_dietary_lipid_Main_Pathway	NA	NA	NA	NA	NA	NA	NA	NA	NA	NA	NA	NA	NA
NA	reactome_Dissolution_of_Fibrin_Clot_Main_Pathway	NA	NA	NA	NA	NA	NA	NA	NA	NA	NA	NA	NA	NA
NA	reactome_Dopamine_Neurotransmitter_Release_Cycle_Main_Pathway	NA	NA	NA	NA	NA	NA	NA	NA	NA	NA	NA	NA	NA
NA	reactome_Dopamine_receptors_Main_Pathway	NA	NA	NA	NA	NA	NA	NA	NA	NA	NA	NA	NA	NA
NA	reactome_Downregulation_of_TGF_beta_receptor_signaling_Main_Pathway	NA	NA	NA	NA	NA	NA	NA	NA	NA	NA	NA	NA	NA
NA	reactome_ECM_proteoglycans_Main_Pathway	NA	NA	NA	NA	NA	NA	NA	NA	NA	NA	NA	NA	NA
NA	reactome_Effects_of_PIP2_hydrolysis_Main_Pathway	NA	NA	NA	NA	NA	NA	NA	NA	NA	NA	NA	NA	NA
NA	reactome_EGFR_interacts_with_phospholipase_C_gamma_Main_Pathway	NA	NA	NA	NA	NA	NA	NA	NA	NA	NA	NA	NA	NA
NA	reactome_EGFR_Transactivation_by_Gastrin_Main_Pathway	NA	NA	NA	NA	NA	NA	NA	NA	NA	NA	NA	NA	NA
NA	reactome_Elastic_fibre_formation_Main_Pathway	NA	NA	NA	NA	NA	NA	NA	NA	NA	NA	NA	NA	NA
NA	reactome_Elevation_of_cytosolic_Ca2_levels_Main_Pathway	NA	NA	NA	NA	NA	NA	NA	NA	NA	NA	NA	NA	NA
NA	reactome_Endosomal_Vacuolar_Main_Pathway	NA	NA	NA	NA	NA	NA	NA	NA	NA	NA	NA	NA	NA
NA	reactome_EPH_ephrin_mediated_repulsion_of_cells_Main_Pathway	NA	NA	NA	NA	NA	NA	NA	NA	NA	NA	NA	NA	NA
NA	reactome_ER_Quality_Control_Compartment_ERQC__Main_Pathway	NA	NA	NA	NA	NA	NA	NA	NA	NA	NA	NA	NA	NA
NA	reactome_ERKs_are_inactivated_Main_Pathway	NA	NA	NA	NA	NA	NA	NA	NA	NA	NA	NA	NA	NA
NA	reactome_Facilitative_Na_independent_glucose_transporters_Main_Pathway	NA	NA	NA	NA	NA	NA	NA	NA	NA	NA	NA	NA	NA
NA	reactome_FasL_CD95L_signaling_Main_Pathway	NA	NA	NA	NA	NA	NA	NA	NA	NA	NA	NA	NA	NA
NA	reactome_FCGR_activation_Main_Pathway	NA	NA	NA	NA	NA	NA	NA	NA	NA	NA	NA	NA	NA
NA	reactome_Fibronectin_matrix_formation_Main_Pathway	NA	NA	NA	NA	NA	NA	NA	NA	NA	NA	NA	NA	NA
NA	reactome_Formation_of_annular_gap_junctions_Main_Pathway	NA	NA	NA	NA	NA	NA	NA	NA	NA	NA	NA	NA	NA
NA	reactome_Formyl_peptide_receptors_bind_formyl_peptides_and_many_other_ligands_Main_Pathway	NA	NA	NA	NA	NA	NA	NA	NA	NA	NA	NA	NA	NA
NA	reactome_GAB1_signalosome_Main_Pathway	NA	NA	NA	NA	NA	NA	NA	NA	NA	NA	NA	NA	NA
NA	reactome_GABA_synthesis_release_reuptake_and_degradation_Main_Pathway	NA	NA	NA	NA	NA	NA	NA	NA	NA	NA	NA	NA	NA
NA	reactome_Gap_junction_assembly_Main_Pathway	NA	NA	NA	NA	NA	NA	NA	NA	NA	NA	NA	NA	NA
NA	reactome_Gap_junction_degradation_Main_Pathway	NA	NA	NA	NA	NA	NA	NA	NA	NA	NA	NA	NA	NA
NA	reactome_Glutamate_Neurotransmitter_Release_Cycle_Main_Pathway	NA	NA	NA	NA	NA	NA	NA	NA	NA	NA	NA	NA	NA
NA	reactome_Glycogen_breakdown_glycogenolysis__Main_Pathway	NA	NA	NA	NA	NA	NA	NA	NA	NA	NA	NA	NA	NA
NA	reactome_Glycogen_synthesis_Main_Pathway	NA	NA	NA	NA	NA	NA	NA	NA	NA	NA	NA	NA	NA
NA	reactome_Glycosphingolipid_metabolism_Main_Pathway	NA	NA	NA	NA	NA	NA	NA	NA	NA	NA	NA	NA	NA
NA	reactome_Growth_hormone_receptor_signaling_Main_Pathway	NA	NA	NA	NA	NA	NA	NA	NA	NA	NA	NA	NA	NA
NA	reactome_Histamine_receptors_Main_Pathway	NA	NA	NA	NA	NA	NA	NA	NA	NA	NA	NA	NA	NA
NA	reactome_Hypusinylation_Main_Pathway	NA	NA	NA	NA	NA	NA	NA	NA	NA	NA	NA	NA	NA
NA	reactome_Initial_triggering_of_complement_Main_Pathway	NA	NA	NA	NA	NA	NA	NA	NA	NA	NA	NA	NA	NA
NA	reactome_Inositol_transporters_Main_Pathway	NA	NA	NA	NA	NA	NA	NA	NA	NA	NA	NA	NA	NA
NA	reactome_Insulin_receptor_recycling_Main_Pathway	NA	NA	NA	NA	NA	NA	NA	NA	NA	NA	NA	NA	NA
NA	reactome_Interaction_With_The_Zona_Pellucida_Main_Pathway	NA	NA	NA	NA	NA	NA	NA	NA	NA	NA	NA	NA	NA
NA	reactome_Interconversion_of_2_oxoglutarate_and_2_hydroxyglutarate_Main_Pathway	NA	NA	NA	NA	NA	NA	NA	NA	NA	NA	NA	NA	NA
NA	reactome_Interconversion_of_polyamines_Main_Pathway	NA	NA	NA	NA	NA	NA	NA	NA	NA	NA	NA	NA	NA
NA	reactome_Interferon_gamma_signaling_Main_Pathway	NA	NA	NA	NA	NA	NA	NA	NA	NA	NA	NA	NA	NA
NA	reactome_Interleukin_6_signaling_Main_Pathway	NA	NA	NA	NA	NA	NA	NA	NA	NA	NA	NA	NA	NA
NA	reactome_Intrinsic_Pathway_Main_Pathway	NA	NA	NA	NA	NA	NA	NA	NA	NA	NA	NA	NA	NA
NA	reactome_Ion_transport_by_P_type_ATPases_Main_Pathway	NA	NA	NA	NA	NA	NA	NA	NA	NA	NA	NA	NA	NA
NA	reactome_IRS_activation_Main_Pathway	NA	NA	NA	NA	NA	NA	NA	NA	NA	NA	NA	NA	NA
NA	reactome_IRS_related_events_triggered_by_IGF1R_Main_Pathway	NA	NA	NA	NA	NA	NA	NA	NA	NA	NA	NA	NA	NA
NA	reactome_ISG15_antiviral_mechanism_Main_Pathway	NA	NA	NA	NA	NA	NA	NA	NA	NA	NA	NA	NA	NA
NA	reactome_Keratan_sulfate_degradation_Main_Pathway	NA	NA	NA	NA	NA	NA	NA	NA	NA	NA	NA	NA	NA
NA	reactome_L1CAM_interactions_Main_Pathway	NA	NA	NA	NA	NA	NA	NA	NA	NA	NA	NA	NA	NA
NA	reactome_Laminin_interactions_Main_Pathway	NA	NA	NA	NA	NA	NA	NA	NA	NA	NA	NA	NA	NA
NA	reactome_Lysosphingolipid_and_LPA_receptors_Main_Pathway	NA	NA	NA	NA	NA	NA	NA	NA	NA	NA	NA	NA	NA
NA	reactome_Metabolism_of_Angiotensinogen_to_Angiotensins_Main_Pathway	NA	NA	NA	NA	NA	NA	NA	NA	NA	NA	NA	NA	NA
NA	reactome_Metal_ion_SLC_transporters_Main_Pathway	NA	NA	NA	NA	NA	NA	NA	NA	NA	NA	NA	NA	NA
NA	reactome_Miscellaneous_substrates_Main_Pathway	NA	NA	NA	NA	NA	NA	NA	NA	NA	NA	NA	NA	NA
NA	reactome_misspliced_LRP5_mutants_have_enhanced_beta_catenin_dependent_signaling_Main_Pathway	NA	NA	NA	NA	NA	NA	NA	NA	NA	NA	NA	NA	NA
NA	reactome_Molecules_associated_with_elastic_fibres_Main_Pathway	NA	NA	NA	NA	NA	NA	NA	NA	NA	NA	NA	NA	NA
NA	reactome_Multifunctional_anion_exchangers_Main_Pathway	NA	NA	NA	NA	NA	NA	NA	NA	NA	NA	NA	NA	NA
NA	reactome_MyD88_cascade_initiated_on_plasma_membrane_Main_Pathway	NA	NA	NA	NA	NA	NA	NA	NA	NA	NA	NA	NA	NA
NA	reactome_MyD88_independent_cascade_Main_Pathway	NA	NA	NA	NA	NA	NA	NA	NA	NA	NA	NA	NA	NA
NA	reactome_N_Glycan_antennae_elongation_Main_Pathway	NA	NA	NA	NA	NA	NA	NA	NA	NA	NA	NA	NA	NA
NA	reactome_N_glycan_trimming_in_the_ER_and_Calnexin_Calreticulin_cycle_Main_Pathway	NA	NA	NA	NA	NA	NA	NA	NA	NA	NA	NA	NA	NA
NA	reactome_Nectin_Necl_trans_heterodimerization_Main_Pathway	NA	NA	NA	NA	NA	NA	NA	NA	NA	NA	NA	NA	NA
NA	reactome_Neurofascin_interactions_Main_Pathway	NA	NA	NA	NA	NA	NA	NA	NA	NA	NA	NA	NA	NA
NA	reactome_NGF_processing_Main_Pathway	NA	NA	NA	NA	NA	NA	NA	NA	NA	NA	NA	NA	NA
NA	reactome_Nicotinate_metabolism_Main_Pathway	NA	NA	NA	NA	NA	NA	NA	NA	NA	NA	NA	NA	NA
NA	reactome_Non_integrin_membrane_ECM_interactions_Main_Pathway	NA	NA	NA	NA	NA	NA	NA	NA	NA	NA	NA	NA	NA
NA	reactome_Norepinephrine_Neurotransmitter_Release_Cycle_Main_Pathway	NA	NA	NA	NA	NA	NA	NA	NA	NA	NA	NA	NA	NA
NA	reactome_NOTCH2_Activation_and_Transmission_of_Signal_to_the_Nucleus_Main_Pathway	NA	NA	NA	NA	NA	NA	NA	NA	NA	NA	NA	NA	NA
NA	reactome_NrCAM_interactions_Main_Pathway	NA	NA	NA	NA	NA	NA	NA	NA	NA	NA	NA	NA	NA
NA	reactome_O_glycosylation_of_TSR_domain_containing_proteins_Main_Pathway	NA	NA	NA	NA	NA	NA	NA	NA	NA	NA	NA	NA	NA
NA	reactome_Oncogene_Induced_Senescence_Main_Pathway	NA	NA	NA	NA	NA	NA	NA	NA	NA	NA	NA	NA	NA
NA	reactome_Organic_anion_transporters_Main_Pathway	NA	NA	NA	NA	NA	NA	NA	NA	NA	NA	NA	NA	NA
NA	reactome_Organic_cation_transport_Main_Pathway	NA	NA	NA	NA	NA	NA	NA	NA	NA	NA	NA	NA	NA
NA	reactome_Oxidative_Stress_Induced_Senescence_Main_Pathway	NA	NA	NA	NA	NA	NA	NA	NA	NA	NA	NA	NA	NA
NA	reactome_Oxygen_dependent_asparagine_hydroxylation_of_Hypoxia_inducible_Factor_Alpha_Main_Pathway	NA	NA	NA	NA	NA	NA	NA	NA	NA	NA	NA	NA	NA
NA	reactome_PECAM1_interactions_Main_Pathway	NA	NA	NA	NA	NA	NA	NA	NA	NA	NA	NA	NA	NA
NA	reactome_Phagosomal_maturation_early_endosomal_stage__Main_Pathway	NA	NA	NA	NA	NA	NA	NA	NA	NA	NA	NA	NA	NA
NA	reactome_PI3K_AKT_activation_Main_Pathway	NA	NA	NA	NA	NA	NA	NA	NA	NA	NA	NA	NA	NA
NA	reactome_PI3K_Cascade_Main_Pathway	NA	NA	NA	NA	NA	NA	NA	NA	NA	NA	NA	NA	NA
NA	reactome_Plasmalogen_biosynthesis_Main_Pathway	NA	NA	NA	NA	NA	NA	NA	NA	NA	NA	NA	NA	NA
NA	reactome_PLC_beta_mediated_events_Main_Pathway	NA	NA	NA	NA	NA	NA	NA	NA	NA	NA	NA	NA	NA
NA	reactome_Pre_NOTCH_Processing_in_Golgi_Main_Pathway	NA	NA	NA	NA	NA	NA	NA	NA	NA	NA	NA	NA	NA
NA	reactome_Pre_NOTCH_Processing_in_the_Endoplasmic_Reticulum_Main_Pathway	NA	NA	NA	NA	NA	NA	NA	NA	NA	NA	NA	NA	NA
NA	reactome_Pregnenolone_biosynthesis_Main_Pathway	NA	NA	NA	NA	NA	NA	NA	NA	NA	NA	NA	NA	NA
NA	reactome_Prolactin_receptor_signaling_Main_Pathway	NA	NA	NA	NA	NA	NA	NA	NA	NA	NA	NA	NA	NA
NA	reactome_Pyruvate_metabolism_Main_Pathway	NA	NA	NA	NA	NA	NA	NA	NA	NA	NA	NA	NA	NA
NA	reactome_Receptor_ligand_binding_initiates_the_second_proteolytic_cleavage_of_Notch_receptor_Main_Pathway	NA	NA	NA	NA	NA	NA	NA	NA	NA	NA	NA	NA	NA
NA	reactome_Recycling_pathway_of_L1_Main_Pathway	NA	NA	NA	NA	NA	NA	NA	NA	NA	NA	NA	NA	NA
NA	reactome_Regulated_proteolysis_of_p75NTR_Main_Pathway	NA	NA	NA	NA	NA	NA	NA	NA	NA	NA	NA	NA	NA
NA	reactome_Regulation_by_c_FLIP_Main_Pathway	NA	NA	NA	NA	NA	NA	NA	NA	NA	NA	NA	NA	NA
NA	reactome_Regulation_of_Complement_cascade_Main_Pathway	NA	NA	NA	NA	NA	NA	NA	NA	NA	NA	NA	NA	NA
NA	reactome_Regulation_of_gene_expression_in_endocrine_committed_NEUROG3_progenitor_cells_Main_Pathway	NA	NA	NA	NA	NA	NA	NA	NA	NA	NA	NA	NA	NA
NA	reactome_Regulation_of_gene_expression_in_late_stage_branching_morphogenesis_pancreatic_bud_precursor_cells_Main_Pathway	NA	NA	NA	NA	NA	NA	NA	NA	NA	NA	NA	NA	NA
NA	reactome_Regulation_of_IFNG_signaling_Main_Pathway	NA	NA	NA	NA	NA	NA	NA	NA	NA	NA	NA	NA	NA
NA	reactome_Regulation_of_IGF_Activity_by_IGFBP_Main_Pathway	NA	NA	NA	NA	NA	NA	NA	NA	NA	NA	NA	NA	NA
NA	reactome_Regulation_of_KIT_signaling_Main_Pathway	NA	NA	NA	NA	NA	NA	NA	NA	NA	NA	NA	NA	NA
NA	reactome_Rhesus_glycoproteins_mediate_ammonium_transport__Main_Pathway	NA	NA	NA	NA	NA	NA	NA	NA	NA	NA	NA	NA	NA
NA	reactome_RIG_I_MDA5_mediated_induction_of_IFN_alpha_beta_pathways_Main_Pathway	NA	NA	NA	NA	NA	NA	NA	NA	NA	NA	NA	NA	NA
NA	reactome_RNA_Polymerase_I_Promoter_Opening_Main_Pathway	NA	NA	NA	NA	NA	NA	NA	NA	NA	NA	NA	NA	NA
NA	reactome_RNF_mutants_show_enhanced_WNT_signaling_and_proliferation_Main_Pathway	NA	NA	NA	NA	NA	NA	NA	NA	NA	NA	NA	NA	NA
NA	reactome_Role_of_LAT2_NTAL_LAB_on_calcium_mobilization_Main_Pathway	NA	NA	NA	NA	NA	NA	NA	NA	NA	NA	NA	NA	NA
NA	reactome_Role_of_phospholipids_in_phagocytosis_Main_Pathway	NA	NA	NA	NA	NA	NA	NA	NA	NA	NA	NA	NA	NA
NA	reactome_Serotonin_Neurotransmitter_Release_Cycle_Main_Pathway	NA	NA	NA	NA	NA	NA	NA	NA	NA	NA	NA	NA	NA
NA	reactome_Serotonin_receptors_Main_Pathway	NA	NA	NA	NA	NA	NA	NA	NA	NA	NA	NA	NA	NA
NA	reactome_SHC_related_events_triggered_by_IGF1R_Main_Pathway	NA	NA	NA	NA	NA	NA	NA	NA	NA	NA	NA	NA	NA
NA	reactome_SHC1_events_in_ERBB2_signaling_Main_Pathway	NA	NA	NA	NA	NA	NA	NA	NA	NA	NA	NA	NA	NA
NA	reactome_SHC1_events_in_ERBB4_signaling_Main_Pathway	NA	NA	NA	NA	NA	NA	NA	NA	NA	NA	NA	NA	NA
NA	reactome_Sialic_acid_metabolism_Main_Pathway	NA	NA	NA	NA	NA	NA	NA	NA	NA	NA	NA	NA	NA
NA	reactome_Signal_attenuation_Main_Pathway	NA	NA	NA	NA	NA	NA	NA	NA	NA	NA	NA	NA	NA
NA	reactome_Signal_transduction_by_L1_Main_Pathway	NA	NA	NA	NA	NA	NA	NA	NA	NA	NA	NA	NA	NA
NA	reactome_Signaling_by_Activin_Main_Pathway	NA	NA	NA	NA	NA	NA	NA	NA	NA	NA	NA	NA	NA
NA	reactome_Signaling_by_EGFR_Main_Pathway	NA	NA	NA	NA	NA	NA	NA	NA	NA	NA	NA	NA	NA
NA	reactome_Signaling_by_ERBB2_Main_Pathway	NA	NA	NA	NA	NA	NA	NA	NA	NA	NA	NA	NA	NA
NA	reactome_Signaling_by_ERBB4_Main_Pathway	NA	NA	NA	NA	NA	NA	NA	NA	NA	NA	NA	NA	NA
NA	reactome_Signaling_by_Leptin_Main_Pathway	NA	NA	NA	NA	NA	NA	NA	NA	NA	NA	NA	NA	NA
NA	reactome_Signaling_by_NOTCH3_Main_Pathway	NA	NA	NA	NA	NA	NA	NA	NA	NA	NA	NA	NA	NA
NA	reactome_Signaling_by_NOTCH4_Main_Pathway	NA	NA	NA	NA	NA	NA	NA	NA	NA	NA	NA	NA	NA
NA	reactome_Signaling_by_SCF_KIT_Main_Pathway	NA	NA	NA	NA	NA	NA	NA	NA	NA	NA	NA	NA	NA
NA	reactome_Signaling_by_Type_1_Insulin_like_Growth_Factor_1_Receptor_IGF1R__Main_Pathway	NA	NA	NA	NA	NA	NA	NA	NA	NA	NA	NA	NA	NA
NA	reactome_Signaling_by_Wnt_Main_Pathway	NA	NA	NA	NA	NA	NA	NA	NA	NA	NA	NA	NA	NA
NA	reactome_Signalling_to_p38_via_RIT_and_RIN_Main_Pathway	NA	NA	NA	NA	NA	NA	NA	NA	NA	NA	NA	NA	NA
NA	reactome_SMAD2_3_MH2_Domain_Mutants_in_Cancer_Main_Pathway	NA	NA	NA	NA	NA	NA	NA	NA	NA	NA	NA	NA	NA
NA	reactome_SMAD2_3_Phosphorylation_Motif_Mutants_in_Cancer_Main_Pathway	NA	NA	NA	NA	NA	NA	NA	NA	NA	NA	NA	NA	NA
NA	reactome_Smooth_Muscle_Contraction_Main_Pathway	NA	NA	NA	NA	NA	NA	NA	NA	NA	NA	NA	NA	NA
NA	reactome_SOS_mediated_signalling_Main_Pathway	NA	NA	NA	NA	NA	NA	NA	NA	NA	NA	NA	NA	NA
NA	reactome_Sperm_Oocyte_Membrane_Binding_Main_Pathway	NA	NA	NA	NA	NA	NA	NA	NA	NA	NA	NA	NA	NA
NA	reactome_Sphingolipid_de_novo_biosynthesis_Main_Pathway	NA	NA	NA	NA	NA	NA	NA	NA	NA	NA	NA	NA	NA
NA	reactome_Stabilization_of_p53_Main_Pathway	NA	NA	NA	NA	NA	NA	NA	NA	NA	NA	NA	NA	NA
NA	reactome_Sulfide_oxidation_to_sulfate_Main_Pathway	NA	NA	NA	NA	NA	NA	NA	NA	NA	NA	NA	NA	NA
NA	reactome_Synthesis_of_Dolichyl_phosphate_Main_Pathway	NA	NA	NA	NA	NA	NA	NA	NA	NA	NA	NA	NA	NA
NA	reactome_Synthesis_of_IP2_IP_and_Ins_in_the_cytosol_Main_Pathway	NA	NA	NA	NA	NA	NA	NA	NA	NA	NA	NA	NA	NA
NA	reactome_Synthesis_of_PC_Main_Pathway	NA	NA	NA	NA	NA	NA	NA	NA	NA	NA	NA	NA	NA
NA	reactome_Synthesis_of_Prostaglandins_PG_and_Thromboxanes_TX__Main_Pathway	NA	NA	NA	NA	NA	NA	NA	NA	NA	NA	NA	NA	NA
NA	reactome_Synthesis_of_UDP_N_acetyl_glucosamine_Main_Pathway	NA	NA	NA	NA	NA	NA	NA	NA	NA	NA	NA	NA	NA
NA	reactome_Terminal_pathway_of_complement_Main_Pathway	NA	NA	NA	NA	NA	NA	NA	NA	NA	NA	NA	NA	NA
NA	reactome_TGF_beta_receptor_signaling_activates_SMADs_Main_Pathway	NA	NA	NA	NA	NA	NA	NA	NA	NA	NA	NA	NA	NA
NA	reactome_TGFBR1_KD_Mutants_in_Cancer_Main_Pathway	NA	NA	NA	NA	NA	NA	NA	NA	NA	NA	NA	NA	NA
NA	reactome_TGFBR2_Kinase_Domain_Mutants_in_Cancer_Main_Pathway	NA	NA	NA	NA	NA	NA	NA	NA	NA	NA	NA	NA	NA
NA	reactome_The_activation_of_arylsulfatases_Main_Pathway	NA	NA	NA	NA	NA	NA	NA	NA	NA	NA	NA	NA	NA
NA	reactome_The_NLRP1_inflammasome_Main_Pathway	NA	NA	NA	NA	NA	NA	NA	NA	NA	NA	NA	NA	NA
NA	reactome_Tie2_Signaling_Main_Pathway	NA	NA	NA	NA	NA	NA	NA	NA	NA	NA	NA	NA	NA
NA	reactome_Toll_Like_Receptor_4_TLR4_Cascade_Main_Pathway	NA	NA	NA	NA	NA	NA	NA	NA	NA	NA	NA	NA	NA
NA	reactome_Toll_Like_Receptor_TLR6_TLR2_Cascade_Main_Pathway	NA	NA	NA	NA	NA	NA	NA	NA	NA	NA	NA	NA	NA
NA	reactome_Toxicity_of_botulinum_toxin_type_B_BoNT_B__Main_Pathway	NA	NA	NA	NA	NA	NA	NA	NA	NA	NA	NA	NA	NA
NA	reactome_Toxicity_of_botulinum_toxin_type_G_BoNT_G__Main_Pathway	NA	NA	NA	NA	NA	NA	NA	NA	NA	NA	NA	NA	NA
NA	reactome_Trafficking_and_processing_of_endosomal_TLR_Main_Pathway	NA	NA	NA	NA	NA	NA	NA	NA	NA	NA	NA	NA	NA
NA	reactome_Trafficking_of_AMPA_receptors_Main_Pathway	NA	NA	NA	NA	NA	NA	NA	NA	NA	NA	NA	NA	NA
NA	reactome_Trafficking_of_GluR2_containing_AMPA_receptors_Main_Pathway	NA	NA	NA	NA	NA	NA	NA	NA	NA	NA	NA	NA	NA
NA	reactome_TRAIL_signaling_Main_Pathway	NA	NA	NA	NA	NA	NA	NA	NA	NA	NA	NA	NA	NA
NA	reactome_Transferrin_endocytosis_and_recycling_Main_Pathway	NA	NA	NA	NA	NA	NA	NA	NA	NA	NA	NA	NA	NA
NA	reactome_Transport_and_synthesis_of_PAPS_Main_Pathway	NA	NA	NA	NA	NA	NA	NA	NA	NA	NA	NA	NA	NA
NA	reactome_Transport_of_glucose_and_other_sugars_bile_salts_and_organic_acids_metal_ions_and_amine_compounds_Main_Pathway	NA	NA	NA	NA	NA	NA	NA	NA	NA	NA	NA	NA	NA
NA	reactome_Transport_of_inorganic_cations_anions_and_amino_acids_oligopeptides_Main_Pathway	NA	NA	NA	NA	NA	NA	NA	NA	NA	NA	NA	NA	NA
NA	reactome_Transport_of_nucleotide_sugars_Main_Pathway	NA	NA	NA	NA	NA	NA	NA	NA	NA	NA	NA	NA	NA
NA	reactome_Transport_of_organic_anions_Main_Pathway	NA	NA	NA	NA	NA	NA	NA	NA	NA	NA	NA	NA	NA
NA	reactome_Type_I_hemidesmosome_assembly_Main_Pathway	NA	NA	NA	NA	NA	NA	NA	NA	NA	NA	NA	NA	NA
NA	reactome_VEGF_binds_to_VEGFR_leading_to_receptor_dimerization_Main_Pathway	NA	NA	NA	NA	NA	NA	NA	NA	NA	NA	NA	NA	NA
NA	reactome_Vitamin_C_ascorbate_metabolism_Main_Pathway	NA	NA	NA	NA	NA	NA	NA	NA	NA	NA	NA	NA	NA
NA	reactome_Vitamin_D_calciferol_metabolism_Main_Pathway	NA	NA	NA	NA	NA	NA	NA	NA	NA	NA	NA	NA	NA
NA	reactome_Vpr_mediated_induction_of_apoptosis_by_mitochondrial_outer_membrane_permeabilization_Main_Pathway	NA	NA	NA	NA	NA	NA	NA	NA	NA	NA	NA	NA	NA
NA	reactome_WNT_ligand_biogenesis_and_trafficking_Main_Pathway	NA	NA	NA	NA	NA	NA	NA	NA	NA	NA	NA	NA	NA
NA	reactome_Xenobiotics_Main_Pathway	NA	NA	NA	NA	NA	NA	NA	NA	NA	NA	NA	NA	NA
NA	reactome_Zinc_influx_into_cells_by_the_SLC39_gene_family_Main_Pathway	NA	NA	NA	NA	NA	NA	NA	NA	NA	NA	NA	NA	NA
NA	STAT3_Pathway	NA	NA	NA	NA	NA	NA	NA	NA	NA	NA	NA	NA	NA
NA	STAT3_Pathway_Growth_Arrest_and_Differentiation	NA	NA	NA	NA	NA	NA	NA	NA	NA	NA	NA	NA	NA
NA	TGF-Beta_Pathway	NA	NA	NA	NA	NA	NA	NA	NA	NA	NA	NA	NA	NA
NA	TGF-Beta_Pathway_Post_Transciptional_G1_Arrest	NA	NA	NA	NA	NA	NA	NA	NA	NA	NA	NA	NA	NA
NA	TRAF_Pathway_Cell_Survival	NA	NA	NA	NA	NA	NA	NA	NA	NA	NA	NA	NA	NA
NA	WNT_Pathway	NA	NA	NA	NA	NA	NA	NA	NA	NA	NA	NA	NA	NA
NA	WNT_Pathway_NFAT_Pathway	NA	NA	NA	NA	NA	NA	NA	NA	NA	NA	NA	NA	NA
NA	WNT_Pathway_PKC_Pathway	NA	NA	NA	NA	NA	NA	NA	NA	NA	NA	NA	NA	NA

## Sheet: GSE59861_6h_GSE55118
X1_sets_GSE55118_middle_vs_young	X1_sets_GSE55118_old_vs_young	X1_sets_GSE59861_6h_2Gy	X1_sets_GSE59861_6h_5cGy	X2_sets_GSE55118_middle_vs_young_GSE55118_old_vs_young	X2_sets_GSE55118_middle_vs_young_GSE59861_6h_2Gy	X2_sets_GSE55118_middle_vs_young_GSE59861_6h_5cGy	X2_sets_GSE55118_old_vs_young_GSE59861_6h_2Gy	X2_sets_GSE55118_old_vs_young_GSE59861_6h_5cGy	X2_sets_GSE59861_6h_2Gy_GSE59861_6h_5cGy	X3_sets_GSE55118_middle_vs_young_GSE55118_old_vs_young_GSE59861_6h_2Gy	X3_sets_GSE55118_middle_vs_young_GSE55118_old_vs_young_GSE59861_6h_5cGy	X3_sets_GSE55118_middle_vs_young_GSE59861_6h_2Gy_GSE59861_6h_5cGy	X3_sets_GSE55118_old_vs_young_GSE59861_6h_2Gy_GSE59861_6h_5cGy	X4_sets_GSE55118_middle_vs_young_GSE55118_old_vs_young_GSE59861_6h_2Gy_GSE59861_6h_5cGy
AHR_Pathway_PS2_Gene_expression_via_ESR1	NCI_CD40_CD40L_signaling_Pathway_(proteasomal_ubiquitin_dependent_protein_catabolic_process)	BRCA1_Pathway_G1_S_arrest	NA	NCI_N_cadherin_signaling_events_Pathway_(adherens_junction_organization)	NA	NA	NA	NA	NA	NA	NA	NA	NA	NA
NCI_Arf6_downstream_Pathway_(liver_development)	NCI_EPHA2_forward_signaling_Main_Pathway	NA	NA	NCI_RhoA_signaling_Pathway_(Pathway_positive_regulation_of_NF_kappaB_transcription_factor_activity_via_RHOA)	NA	NA	NA	NA	NA	NA	NA	NA	NA	NA
NCI_Arf6_downstream_Pathway_(myoblast_fusion)	NCI_N_cadherin_signaling_events_Pathway_(adherens_junction_organization)	NA	NA	NCI_Stabilization_and_expansion_of_the_E_cadherin_adherens_junction_Pathway_(adherens_junction_organization)	NA	NA	NA	NA	NA	NA	NA	NA	NA	NA
NCI_Arf6_downstream_Pathway_(regulation_of_epithelial_cell_migration)	NCI_PAR1_mediated_thrombin_signaling_events_Pathway_(chemotaxis)	NA	NA	NA	NA	NA	NA	NA	NA	NA	NA	NA	NA	NA
NCI_Arf6_downstream_Pathway_(substrate_adhesion_dependent_cell_spreading)	NCI_PAR1_mediated_thrombin_signaling_events_Pathway_(Regulation_of_Cell_Shape)	NA	NA	NA	NA	NA	NA	NA	NA	NA	NA	NA	NA	NA
NCI_Arf6_trafficking_events_Pathway_(clathrin_independent_pinocytosis)	NCI_PAR4_mediated_thrombin_signaling_events_Pathway_(platelet_aggregation)	NA	NA	NA	NA	NA	NA	NA	NA	NA	NA	NA	NA	NA
NCI_Arf6_trafficking_events_Pathway_(positive_regulation_of_endocytosis)	NCI_PAR4_mediated_thrombin_signaling_events_Pathway_(Regulation_of_Cell_Shape)	NA	NA	NA	NA	NA	NA	NA	NA	NA	NA	NA	NA	NA
NCI_Arf6_trafficking_events_Pathway_(receptor_recycling)	NCI_Regulation_of_nuclear_SMAD2_3_signaling_Pathway_(negative_regulation_of_cell_growth)	NA	NA	NA	NA	NA	NA	NA	NA	NA	NA	NA	NA	NA
NCI_LPA_receptor_mediated_events_Pathway_(contractile_ring_contraction_involved_in_cytokinesis)	NCI_RhoA_signaling_Pathway_(Pathway_positive_regulation_of_NF_kappaB_transcription_factor_activity_via_RHOA)	NA	NA	NA	NA	NA	NA	NA	NA	NA	NA	NA	NA	NA
NCI_N_cadherin_signaling_events_Pathway_(adherens_junction_organization)	NCI_Stabilization_and_expansion_of_the_E_cadherin_adherens_junction_Pathway_(adherens_junction_organization)	NA	NA	NA	NA	NA	NA	NA	NA	NA	NA	NA	NA	NA
NCI_PAR1_mediated_thrombin_signaling_events_Pathway_(focal_adhesion_assembly)	NCI_Syndecan_2_mediated_signaling_events_Pathway_(positive_regulation_of_cell_cell_adhesion)	NA	NA	NA	NA	NA	NA	NA	NA	NA	NA	NA	NA	NA
NCI_PLK2_and_PLK4_events_Main_Pathway	reactome_AMPK_inhibits_chREBP_transcriptional_activation_activity_Main_Pathway	NA	NA	NA	NA	NA	NA	NA	NA	NA	NA	NA	NA	NA
NCI_PLK2_and_PLK4_events_Pathway_(regulation_of_centriole_replication)	reactome_Nonhomologous_End_joining_NHEJ__Main_Pathway	NA	NA	NA	NA	NA	NA	NA	NA	NA	NA	NA	NA	NA
NCI_RhoA_signaling_Pathway_(actin_cytoskeleton_organization)	NA	NA	NA	NA	NA	NA	NA	NA	NA	NA	NA	NA	NA	NA
NCI_RhoA_signaling_Pathway_(Golgi_organization)	NA	NA	NA	NA	NA	NA	NA	NA	NA	NA	NA	NA	NA	NA
NCI_RhoA_signaling_Pathway_(Pathway_positive_regulation_of_NF_kappaB_transcription_factor_activity_via_RHOA)	NA	NA	NA	NA	NA	NA	NA	NA	NA	NA	NA	NA	NA	NA
NCI_Stabilization_and_expansion_of_the_E_cadherin_adherens_junction_Pathway_(adherens_junction_organization)	NA	NA	NA	NA	NA	NA	NA	NA	NA	NA	NA	NA	NA	NA
NCI_Syndecan_2_mediated_signaling_events_Pathway_(dendrite_morphogenesis)	NA	NA	NA	NA	NA	NA	NA	NA	NA	NA	NA	NA	NA	NA
NCI_Syndecan_2_mediated_signaling_events_Pathway_(determination_of_left_right_symmetry)	NA	NA	NA	NA	NA	NA	NA	NA	NA	NA	NA	NA	NA	NA
reactome_Mitochondrial_transcription_initiation_Main_Pathway	NA	NA	NA	NA	NA	NA	NA	NA	NA	NA	NA	NA	NA	NA
reactome_PERK_regulates_gene_expression_Main_Pathway	NA	NA	NA	NA	NA	NA	NA	NA	NA	NA	NA	NA	NA	NA
reactome_Synthesis_of_PIPs_at_the_ER_membrane_Main_Pathway	NA	NA	NA	NA	NA	NA	NA	NA	NA	NA	NA	NA	NA	NA

## Sheet: GSE59861_12h_EMTAB2086
X1_sets_EMTAB2086_70_vs_30	X1_sets_EMTAB2086_80_vs_30	X1_sets_GSE59861_12h_2Gy	X1_sets_GSE59861_12h_5cGy	X2_sets_EMTAB2086_70_vs_30_EMTAB2086_80_vs_30	X2_sets_EMTAB2086_70_vs_30_GSE59861_12h_2Gy	X2_sets_EMTAB2086_70_vs_30_GSE59861_12h_5cGy	X2_sets_EMTAB2086_80_vs_30_GSE59861_12h_2Gy	X2_sets_EMTAB2086_80_vs_30_GSE59861_12h_5cGy	X2_sets_GSE59861_12h_2Gy_GSE59861_12h_5cGy	X3_sets_EMTAB2086_70_vs_30_EMTAB2086_80_vs_30_GSE59861_12h_2Gy	X3_sets_EMTAB2086_70_vs_30_EMTAB2086_80_vs_30_GSE59861_12h_5cGy	X3_sets_EMTAB2086_70_vs_30_GSE59861_12h_2Gy_GSE59861_12h_5cGy	X3_sets_EMTAB2086_80_vs_30_GSE59861_12h_2Gy_GSE59861_12h_5cGy	X4_sets_EMTAB2086_70_vs_30_EMTAB2086_80_vs_30_GSE59861_12h_2Gy_GSE59861_12h_5cGy
Akt_Signaling_Pathway_Increased_GLUT4_translocation	AHR_Pathway	BRCA1_Pathway_G1_S_arrest	KEGG_Mineral_absorption_Main_Pathway	Akt_Signaling_Pathway_Increased_GLUT4_translocation	BRCA1_Pathway_G1_S_arrest	KEGG_Mineral_absorption_Main_Pathway	KEGG_Mineral_absorption_Main_Pathway	KEGG_Mineral_absorption_Main_Pathway	KEGG_Mineral_absorption_Main_Pathway	KEGG_Mineral_absorption_Main_Pathway	KEGG_Mineral_absorption_Main_Pathway	KEGG_Mineral_absorption_Main_Pathway	KEGG_Mineral_absorption_Main_Pathway	KEGG_Mineral_absorption_Main_Pathway
Akt_Signaling_Pathway_Promotes_Adipogenesis	AHR_Pathway_Cath_D_expression_via_SP1	KEGG_Mineral_absorption_Main_Pathway	NCI_CD40_CD40L_signaling_Pathway_(proteasomal_ubiquitin_dependent_protein_catabolic_process)	Akt_Signaling_Pathway_Promotes_Adipogenesis	KEGG_Mineral_absorption_Main_Pathway	NCI_CD40_CD40L_signaling_Pathway_(proteasomal_ubiquitin_dependent_protein_catabolic_process)	NA	NA	NCI_Presenilin_action_in_Notch_and_Wnt_signaling_Pathway_(apoptosis)	NA	NA	NA	NA	NA
Akt_Signaling_Pathway_Survival_Genes	AHR_Pathway_PS2_Gene_expression_via_ESR1	NCI_Presenilin_action_in_Notch_and_Wnt_signaling_Pathway_(apoptosis)	NCI_Presenilin_action_in_Notch_and_Wnt_signaling_Pathway_(apoptosis)	Akt_Signaling_Pathway_Survival_Genes	reactome_p53_Dependent_G1_DNA_Damage_Response_Main_Pathway	NA	NA	NA	NCI_Signaling_events_mediated_by_VEGFR1_and_VEGFR2_Pathway_(Pathway_degradation_of_AKAP1)	NA	NA	NA	NA	NA
ATM_Pathway	Akt_Signaling_Pathway	NCI_Signaling_events_mediated_by_VEGFR1_and_VEGFR2_Pathway_(Pathway_degradation_of_AKAP1)	NCI_Signaling_events_mediated_by_VEGFR1_and_VEGFR2_Pathway_(Pathway_degradation_of_AKAP1)	ATM_Pathway	NA	NA	NA	NA	NA	NA	NA	NA	NA	NA
ATM_Pathway_G2-Mitosis_progression	Akt_Signaling_Pathway_Blood_cell_differentiation	NCI_Trk_receptor_signaling_mediated_by_PI3K_and_PLC_gamma_Pathway_(regulation_of_long_term_neuronal_synaptic_plasticity)	NA	ATM_Pathway_G2-Mitosis_progression	NA	NA	NA	NA	NA	NA	NA	NA	NA	NA
ATM_Pathway_G2_M_Checkpoint_Arrest	Akt_Signaling_Pathway_Cell_Cycle	reactome_p53_Dependent_G1_DNA_Damage_Response_Main_Pathway	NA	ATM_Pathway_G2_M_Checkpoint_Arrest	NA	NA	NA	NA	NA	NA	NA	NA	NA	NA
BRCA1_Pathway_E2_Responsive_Genes	Akt_Signaling_Pathway_Cell_Cycle_Progression	NA	NA	KEGG_Allograft_rejection_Main_Pathway	NA	NA	NA	NA	NA	NA	NA	NA	NA	NA
BRCA1_Pathway_G1_S_arrest	Akt_Signaling_Pathway_Cell_Survival	NA	NA	KEGG_Cell_cycle_Main_Pathway	NA	NA	NA	NA	NA	NA	NA	NA	NA	NA
CD40_Pathway_Gene_Expression_Cell_Adhesion_Molecule_via_NFKB2	Akt_Signaling_Pathway_Genetic_Stability	NA	NA	KEGG_Glycosaminoglycan_degradation_Main_Pathway	NA	NA	NA	NA	NA	NA	NA	NA	NA	NA
CD40_Pathway_Gene_Expression_Cell_Survival_via_NFKB2	Akt_Signaling_Pathway_Glucose_Uptake	NA	NA	KEGG_Mineral_absorption_Main_Pathway	NA	NA	NA	NA	NA	NA	NA	NA	NA	NA
CD40_Pathway_Gene_Expression_Co-Stimulatory_Molecules_via_NFKB2	Akt_Signaling_Pathway_Increased_GLUT4_translocation	NA	NA	KEGG_p53_signaling_Main_Pathway	NA	NA	NA	NA	NA	NA	NA	NA	NA	NA
CD40_Pathway_Gene_Expression_COX2_and_Prostaglandins_via_NFKB2	Akt_Signaling_Pathway_Induction_of_Chromatin_Condensation	NA	NA	KEGG_Prion_diseases_Main_Pathway	NA	NA	NA	NA	NA	NA	NA	NA	NA	NA
CD40_Pathway_Gene_Expression_Immunoglobulin_Class_Switch_via_NFKB2	Akt_Signaling_Pathway_JNK_mediated_apoptosis	NA	NA	KEGG_Synaptic_vesicle_cycle_Main_Pathway	NA	NA	NA	NA	NA	NA	NA	NA	NA	NA
CD40_Pathway_Gene_Expression_Pro-Inflamatory_Cytokines_via_NFKB2	Akt_Signaling_Pathway_Promotes_Adipogenesis	NA	NA	NCI_Alpha6_beta4_integrin_ligand_interactions_Main_Pathway	NA	NA	NA	NA	NA	NA	NA	NA	NA	NA
CD40_Pathway_Gene_Expression_Procoagulant_Activity_via_NFKB2	Akt_Signaling_Pathway_Regulation_of_Na+_Transport	NA	NA	NCI_Angiopoietin_receptor_Tie2_mediated_signaling_Main_Pathway	NA	NA	NA	NA	NA	NA	NA	NA	NA	NA
Cellular_Apoptosis_Pathway_Gene_Expression_FLIP_CIAP2_BFL1_BCL2_via_NFKB2	Akt_Signaling_Pathway_Splicing_Regulation	NA	NA	NCI_Arf6_downstream_Pathway_(cortical_actin_cytoskeleton_organization)	NA	NA	NA	NA	NA	NA	NA	NA	NA	NA
Erythropoietin_Pathway_Gene_Expression_Neuroprotection_via_NFKB2	Akt_Signaling_Pathway_Survival_Genes	NA	NA	NCI_Arf6_downstream_Pathway_(lamellipodium_assembly)	NA	NA	NA	NA	NA	NA	NA	NA	NA	NA
KEGG_Allograft_rejection_Main_Pathway	Akt_Signaling_Pathway_Tumor_Supression	NA	NA	NCI_Arf6_trafficking_events_Pathway_(endocytosis)	NA	NA	NA	NA	NA	NA	NA	NA	NA	NA
KEGG_Cell_cycle_Main_Pathway	ATM_Pathway	NA	NA	NCI_Beta1_integrin_cell_surface_interactions_Main_Pathway	NA	NA	NA	NA	NA	NA	NA	NA	NA	NA
KEGG_Glycosaminoglycan_degradation_Main_Pathway	ATM_Pathway_Cell_Survival	NA	NA	NCI_Beta3_integrin_cell_surface_interactions_Main_Pathway	NA	NA	NA	NA	NA	NA	NA	NA	NA	NA
KEGG_Mineral_absorption_Main_Pathway	ATM_Pathway_G2-Mitosis_progression	NA	NA	NCI_Beta5_beta6_beta7_and_beta8_integrin_cell_surface_interactions_Main_Pathway	NA	NA	NA	NA	NA	NA	NA	NA	NA	NA
KEGG_p53_signaling_Main_Pathway	ATM_Pathway_G2_M_Checkpoint_Arrest	NA	NA	NCI_Caspase_Cascade_in_Apoptosis_Pathway_(apoptotic_nuclear_changes)	NA	NA	NA	NA	NA	NA	NA	NA	NA	NA
KEGG_Prion_diseases_Main_Pathway	cAMP_Pathway_Cytokine_Production	NA	NA	NCI_Class_I_PI3K_signaling_events_mediated_by_Akt_Pathway_(negative_regulation_of_cell_cycle)	NA	NA	NA	NA	NA	NA	NA	NA	NA	NA
KEGG_Synaptic_vesicle_cycle_Main_Pathway	cAMP_Pathway_Glycolisis	NA	NA	NCI_Coregulation_of_Androgen_receptor_activity_Main_Pathway	NA	NA	NA	NA	NA	NA	NA	NA	NA	NA
MAPK_Signaling_Pathway_Cell_Survival	CD40_Pathway_Cell_Survival	NA	NA	NCI_Coregulation_of_Androgen_receptor_activity_Pathway_(cell_proliferation)	NA	NA	NA	NA	NA	NA	NA	NA	NA	NA
mTOR_Pathway_Inflammation_Stress_Resistance	Cellular_Apoptosis_Pathway	NA	NA	NCI_CXCR3_mediated_signaling_events_Pathway_(regulation_of_stress_fiber_assembly)	NA	NA	NA	NA	NA	NA	NA	NA	NA	NA
NCI_Alpha6_beta4_integrin_ligand_interactions_Main_Pathway	Cellular_Apoptosis_Pathway_DNA_Fragmentation	NA	NA	NCI_E2F_transcription_factor_network_Main_Pathway	NA	NA	NA	NA	NA	NA	NA	NA	NA	NA
NCI_Alternative_NF_kappaB_Main_Pathway	Circadian_Pathway	NA	NA	NCI_EGFR_dependent_Endothelin_signaling_events_Main_Pathway	NA	NA	NA	NA	NA	NA	NA	NA	NA	NA
NCI_Alternative_NF_kappaB_Pathway_(regulation_of_B_cell_activation)	CREB_Pathway	NA	NA	NCI_Endothelins_Main_Pathway	NA	NA	NA	NA	NA	NA	NA	NA	NA	NA
NCI_Angiopoietin_receptor_Tie2_mediated_signaling_Main_Pathway	EGF_Pathway_Cytoskeleton_Regulation	NA	NA	NCI_Endothelins_Pathway_(cAMP_biosynthetic_process)	NA	NA	NA	NA	NA	NA	NA	NA	NA	NA
NCI_Arf6_downstream_Pathway_(cortical_actin_cytoskeleton_organization)	EGF_Pathway_EGFR_Endocytosis	NA	NA	NCI_Endothelins_Pathway_(positive_regulation_of_muscle_contraction)	NA	NA	NA	NA	NA	NA	NA	NA	NA	NA
NCI_Arf6_downstream_Pathway_(lamellipodium_assembly)	EGF_Pathway_IP3_Signaling	NA	NA	NCI_EPHA2_forward_signaling_Main_Pathway	NA	NA	NA	NA	NA	NA	NA	NA	NA	NA
NCI_Arf6_trafficking_events_Pathway_(endocytosis)	ERK_Signaling_Pathway	NA	NA	NCI_ErbB4_signaling_events_Pathway_(apoptosis)	NA	NA	NA	NA	NA	NA	NA	NA	NA	NA
NCI_Beta1_integrin_cell_surface_interactions_Main_Pathway	ERK_Signaling_Pathway_EGFR_signaling	NA	NA	NCI_ErbB4_signaling_events_Pathway_(axon_guidance)	NA	NA	NA	NA	NA	NA	NA	NA	NA	NA
NCI_Beta3_integrin_cell_surface_interactions_Main_Pathway	Estrogen_Pathway	NA	NA	NCI_ErbB4_signaling_events_Pathway_(cell_proliferation)	NA	NA	NA	NA	NA	NA	NA	NA	NA	NA
NCI_Beta5_beta6_beta7_and_beta8_integrin_cell_surface_interactions_Main_Pathway	FLT3_Signaling_Pathway_Translation	NA	NA	NCI_ErbB4_signaling_events_Pathway_(chemotaxis)	NA	NA	NA	NA	NA	NA	NA	NA	NA	NA
NCI_Caspase_Cascade_in_Apoptosis_Pathway_(apoptotic_nuclear_changes)	Growth_Hormone_Signaling_Pathway	NA	NA	NCI_ErbB4_signaling_events_Pathway_(dendrite_morphogenesis)	NA	NA	NA	NA	NA	NA	NA	NA	NA	NA
NCI_Caspase_Cascade_in_Apoptosis_Pathway_(neuron_apoptosis)	Growth_Hormone_Signaling_Pathway_Cell_Survival	NA	NA	NCI_ErbB4_signaling_events_Pathway_(epithelial_cell_differentiation)	NA	NA	NA	NA	NA	NA	NA	NA	NA	NA
NCI_CD40_CD40L_signaling_Pathway_(proteasomal_ubiquitin_dependent_protein_catabolic_process)	Growth_Hormone_Signaling_Pathway_Gene_Expression_via_SRF_ELK1_STAT5B_CEBPD_STAT1_STAT3	NA	NA	NCI_ErbB4_signaling_events_Pathway_(heart_development)	NA	NA	NA	NA	NA	NA	NA	NA	NA	NA
NCI_Class_I_PI3K_signaling_events_mediated_by_Akt_Pathway_(negative_regulation_of_cell_cycle)	Growth_Hormone_Signaling_Pathway_Glucose_Uptake	NA	NA	NCI_ErbB4_signaling_events_Pathway_(neural_crest_cell_migration)	NA	NA	NA	NA	NA	NA	NA	NA	NA	NA
NCI_Coregulation_of_Androgen_receptor_activity_Main_Pathway	Growth_Hormone_Signaling_Pathway_Protein_Synthesis	NA	NA	NCI_FAS_CD95_signaling_Main_Pathway	NA	NA	NA	NA	NA	NA	NA	NA	NA	NA
NCI_Coregulation_of_Androgen_receptor_activity_Pathway_(cell_proliferation)	GSK3_Signaling_Pathway_Protein_Synthesis	NA	NA	NCI_FAS_CD95_signaling_Pathway_(neuron_projection_development)	NA	NA	NA	NA	NA	NA	NA	NA	NA	NA
NCI_CXCR3_mediated_signaling_events_Pathway_(regulation_of_stress_fiber_assembly)	HIF1Alpha_Pathway_Gene_Expression_via_JUN_CREB3	NA	NA	NCI_Glypican_1_network_Main_Pathway	NA	NA	NA	NA	NA	NA	NA	NA	NA	NA
NCI_E2F_transcription_factor_network_Main_Pathway	HIF1Alpha_Pathway_HIF1a_Degradation	NA	NA	NCI_Glypican_1_network_Pathway_(BMP_signaling_pathway)	NA	NA	NA	NA	NA	NA	NA	NA	NA	NA
NCI_EGFR_dependent_Endothelin_signaling_events_Main_Pathway	HIF1Alpha_Pathway_NOS_Pathway	NA	NA	NCI_Glypican_1_network_Pathway_(cell_growth)	NA	NA	NA	NA	NA	NA	NA	NA	NA	NA
NCI_Endothelins_Main_Pathway	HIF1Alpha_Pathway_VEGF_Pathway	NA	NA	NCI_Glypican_1_network_Pathway_(fibroblast_growth_factor_receptor_signaling_pathway)	NA	NA	NA	NA	NA	NA	NA	NA	NA	NA
NCI_Endothelins_Pathway_(cAMP_biosynthetic_process)	IGF1R_Signaling_Pathway	NA	NA	NCI_p53_Main_Pathway	NA	NA	NA	NA	NA	NA	NA	NA	NA	NA
NCI_Endothelins_Pathway_(positive_regulation_of_muscle_contraction)	IGF1R_Signaling_Pathway_Cell_Migration	NA	NA	NCI_p53_Pathway_(apoptosis)	NA	NA	NA	NA	NA	NA	NA	NA	NA	NA
NCI_EPHA2_forward_signaling_Main_Pathway	IL-10_Pathway_Stability_Determination	NA	NA	NCI_p53_Pathway_(proteasomal_ubiquitin_dependent_protein_catabolic_process)	NA	NA	NA	NA	NA	NA	NA	NA	NA	NA
NCI_Ephrin_B_reverse_signaling_Pathway_(endothelial_cell_proliferation)	IL-2_Pathway_Apoptosis_Inhibition	NA	NA	NCI_PLK3_signaling_events_Main_Pathway	NA	NA	NA	NA	NA	NA	NA	NA	NA	NA
NCI_ErbB4_signaling_events_Pathway_(apoptosis)	IL-6_Pathway	NA	NA	NCI_Signaling_events_mediated_by_HDAC_Class_III_Pathway_(regulation_of_S_phase_of_mitotic_cell_cycle)	NA	NA	NA	NA	NA	NA	NA	NA	NA	NA
NCI_ErbB4_signaling_events_Pathway_(axon_guidance)	ILK_Signaling_Pathway	NA	NA	NCI_Signaling_events_mediated_by_Stem_cell_factor_receptor_c_Kit__Pathway_(actin_filament_polymerization)	NA	NA	NA	NA	NA	NA	NA	NA	NA	NA
NCI_ErbB4_signaling_events_Pathway_(cell_proliferation)	ILK_Signaling_Pathway_Actin_Polymerization_Cytoskeletal_Reorganization	NA	NA	NCI_Signaling_events_mediated_by_Stem_cell_factor_receptor_c_Kit__Pathway_(cell_migration)	NA	NA	NA	NA	NA	NA	NA	NA	NA	NA
NCI_ErbB4_signaling_events_Pathway_(chemotaxis)	ILK_Signaling_Pathway_Cell_Migration_Retraction	NA	NA	NCI_Signaling_events_mediated_by_Stem_cell_factor_receptor_c_Kit__Pathway_(cell_motility)	NA	NA	NA	NA	NA	NA	NA	NA	NA	NA
NCI_ErbB4_signaling_events_Pathway_(dendrite_morphogenesis)	ILK_Signaling_Pathway_Cell_Motility	NA	NA	NCI_Signaling_events_mediated_by_Stem_cell_factor_receptor_c_Kit__Pathway_(positive_regulation_of_cell_proliferation)	NA	NA	NA	NA	NA	NA	NA	NA	NA	NA
NCI_ErbB4_signaling_events_Pathway_(epithelial_cell_differentiation)	ILK_Signaling_Pathway_Cytoskeletal_Adhesion_Complexes	NA	NA	NCI_Urokinase_type_plasminogen_activator_uPA_and_uPAR_mediated_signaling_Main_Pathway	NA	NA	NA	NA	NA	NA	NA	NA	NA	NA
NCI_ErbB4_signaling_events_Pathway_(heart_development)	ILK_Signaling_Pathway_Epithelial_Mesenchymal_Transition_Tubulo-Interstitial_Fibrosis	NA	NA	NCI_VEGF_and_VEGFR_signaling_network_Main_Pathway	NA	NA	NA	NA	NA	NA	NA	NA	NA	NA
NCI_ErbB4_signaling_events_Pathway_(neural_crest_cell_migration)	ILK_Signaling_Pathway_Induced_Cell_Proliferation	NA	NA	NCI_VEGFR1_specific_signals_Main_Pathway	NA	NA	NA	NA	NA	NA	NA	NA	NA	NA
NCI_FAS_CD95_signaling_Main_Pathway	ILK_Signaling_Pathway_Migration_Vasculogenesis	NA	NA	reactome_Acyl_chain_remodeling_of_DAG_and_TAG_Main_Pathway	NA	NA	NA	NA	NA	NA	NA	NA	NA	NA
NCI_FAS_CD95_signaling_Pathway_(neuron_projection_development)	ILK_Signaling_Pathway_Opsonization	NA	NA	reactome_Amino_acid_and_oligopeptide_SLC_transporters_Main_Pathway	NA	NA	NA	NA	NA	NA	NA	NA	NA	NA
NCI_Glypican_1_network_Main_Pathway	IP3_Pathway	NA	NA	reactome_Antigen_Presentation_Folding_assembly_and_peptide_loading_of_class_I_MHC_Main_Pathway	NA	NA	NA	NA	NA	NA	NA	NA	NA	NA
NCI_Glypican_1_network_Pathway_(BMP_signaling_pathway)	JAK-STAT_Pathway_IFN-Inducible_Gene_Expression_via_STAT2_STAT1	NA	NA	reactome_Apoptotic_cleavage_of_cell_adhesion_proteins_Main_Pathway	NA	NA	NA	NA	NA	NA	NA	NA	NA	NA
NCI_Glypican_1_network_Pathway_(cell_growth)	KEGG_Adrenergic_signaling_in_cardiomyocytes_Main_Pathway	NA	NA	reactome_Arachidonate_production_from_DAG_Main_Pathway	NA	NA	NA	NA	NA	NA	NA	NA	NA	NA
NCI_Glypican_1_network_Pathway_(fibroblast_growth_factor_receptor_signaling_pathway)	KEGG_African_trypanosomiasis_Main_Pathway	NA	NA	reactome_Asymmetric_localization_of_PCP_proteins_Main_Pathway	NA	NA	NA	NA	NA	NA	NA	NA	NA	NA
NCI_HIV_1_Nef_Negative_effector_of_Fas_and_TNF_alpha_Pathway_(Pathway_degradation_of_CASP3_CASP7_CASP6)	KEGG_Allograft_rejection_Main_Pathway	NA	NA	reactome_Caspase_mediated_cleavage_of_cytoskeletal_proteins_Main_Pathway	NA	NA	NA	NA	NA	NA	NA	NA	NA	NA
NCI_p53_Main_Pathway	KEGG_Amino_sugar_and_nucleotide_sugar_metabolism_Main_Pathway	NA	NA	reactome_Clathrin_derived_vesicle_budding_Main_Pathway	NA	NA	NA	NA	NA	NA	NA	NA	NA	NA
NCI_p53_Pathway_(apoptosis)	KEGG_Amoebiasis_Main_Pathway	NA	NA	reactome_Cross_presentation_of_particulate_exogenous_antigens_phagosomes__Main_Pathway	NA	NA	NA	NA	NA	NA	NA	NA	NA	NA
NCI_p53_Pathway_(proteasomal_ubiquitin_dependent_protein_catabolic_process)	KEGG_Amyotrophic_lateral_sclerosis_ALS__Main_Pathway	NA	NA	reactome_Crosslinking_of_collagen_fibrils_Main_Pathway	NA	NA	NA	NA	NA	NA	NA	NA	NA	NA
NCI_PLK3_signaling_events_Main_Pathway	KEGG_Antigen_processing_and_presentation_Main_Pathway	NA	NA	reactome_Cyclin_D_associated_events_in_G1_Main_Pathway	NA	NA	NA	NA	NA	NA	NA	NA	NA	NA
NCI_Signaling_events_mediated_by_HDAC_Class_III_Pathway_(regulation_of_S_phase_of_mitotic_cell_cycle)	KEGG_Arrhythmogenic_right_ventricular_cardiomyopathy_ARVC__Main_Pathway	NA	NA	reactome_Dissolution_of_Fibrin_Clot_Main_Pathway	NA	NA	NA	NA	NA	NA	NA	NA	NA	NA
NCI_Signaling_events_mediated_by_Stem_cell_factor_receptor_c_Kit__Pathway_(actin_filament_polymerization)	KEGG_Butirosin_and_neomycin_biosynthesis_Main_Pathway	NA	NA	reactome_Elastic_fibre_formation_Main_Pathway	NA	NA	NA	NA	NA	NA	NA	NA	NA	NA
NCI_Signaling_events_mediated_by_Stem_cell_factor_receptor_c_Kit__Pathway_(cell_migration)	KEGG_Caffeine_metabolism_Main_Pathway	NA	NA	reactome_Endosomal_Vacuolar_Main_Pathway	NA	NA	NA	NA	NA	NA	NA	NA	NA	NA
NCI_Signaling_events_mediated_by_Stem_cell_factor_receptor_c_Kit__Pathway_(cell_motility)	KEGG_Cell_cycle_Main_Pathway	NA	NA	reactome_ER_Quality_Control_Compartment_ERQC__Main_Pathway	NA	NA	NA	NA	NA	NA	NA	NA	NA	NA
NCI_Signaling_events_mediated_by_Stem_cell_factor_receptor_c_Kit__Pathway_(positive_regulation_of_cell_proliferation)	KEGG_Circadian_rhythm_Main_Pathway	NA	NA	reactome_FasL_CD95L_signaling_Main_Pathway	NA	NA	NA	NA	NA	NA	NA	NA	NA	NA
NCI_Urokinase_type_plasminogen_activator_uPA_and_uPAR_mediated_signaling_Main_Pathway	KEGG_Collecting_duct_acid_secretion_Main_Pathway	NA	NA	reactome_Glycosphingolipid_metabolism_Main_Pathway	NA	NA	NA	NA	NA	NA	NA	NA	NA	NA
NCI_VEGF_and_VEGFR_signaling_network_Main_Pathway	KEGG_Complement_and_coagulation_cascades_Main_Pathway	NA	NA	reactome_Interconversion_of_polyamines_Main_Pathway	NA	NA	NA	NA	NA	NA	NA	NA	NA	NA
NCI_VEGFR1_specific_signals_Main_Pathway	KEGG_Dorso_ventral_axis_formation_Main_Pathway	NA	NA	reactome_Interleukin_6_signaling_Main_Pathway	NA	NA	NA	NA	NA	NA	NA	NA	NA	NA
reactome_Acyl_chain_remodeling_of_DAG_and_TAG_Main_Pathway	KEGG_ECM_receptor_interaction_Main_Pathway	NA	NA	reactome_IRS_activation_Main_Pathway	NA	NA	NA	NA	NA	NA	NA	NA	NA	NA
reactome_AKT_phosphorylates_targets_in_the_cytosol_Main_Pathway	KEGG_Endocrine_and_other_factor_regulated_calcium_reabsorption_Main_Pathway	NA	NA	reactome_L1CAM_interactions_Main_Pathway	NA	NA	NA	NA	NA	NA	NA	NA	NA	NA
reactome_Amino_acid_and_oligopeptide_SLC_transporters_Main_Pathway	KEGG_Endocytosis_Main_Pathway	NA	NA	reactome_Nectin_Necl_trans_heterodimerization_Main_Pathway	NA	NA	NA	NA	NA	NA	NA	NA	NA	NA
reactome_Antigen_Presentation_Folding_assembly_and_peptide_loading_of_class_I_MHC_Main_Pathway	KEGG_ErbB_signaling_Main_Pathway	NA	NA	reactome_Nicotinate_metabolism_Main_Pathway	NA	NA	NA	NA	NA	NA	NA	NA	NA	NA
reactome_Apoptotic_cleavage_of_cell_adhesion_proteins_Main_Pathway	KEGG_Fat_digestion_and_absorption_Main_Pathway	NA	NA	reactome_Organic_anion_transporters_Main_Pathway	NA	NA	NA	NA	NA	NA	NA	NA	NA	NA
reactome_Arachidonate_production_from_DAG_Main_Pathway	KEGG_Glycosaminoglycan_biosynthesis_chondroitin_sulfate_dermatan_sulfate_Main_Pathway	NA	NA	reactome_Organic_cation_transport_Main_Pathway	NA	NA	NA	NA	NA	NA	NA	NA	NA	NA
reactome_Asymmetric_localization_of_PCP_proteins_Main_Pathway	KEGG_Glycosaminoglycan_biosynthesis_heparan_sulfate_heparin_Main_Pathway	NA	NA	reactome_Oxidative_Stress_Induced_Senescence_Main_Pathway	NA	NA	NA	NA	NA	NA	NA	NA	NA	NA
reactome_Caspase_mediated_cleavage_of_cytoskeletal_proteins_Main_Pathway	KEGG_Glycosaminoglycan_degradation_Main_Pathway	NA	NA	reactome_Plasmalogen_biosynthesis_Main_Pathway	NA	NA	NA	NA	NA	NA	NA	NA	NA	NA
reactome_Clathrin_derived_vesicle_budding_Main_Pathway	KEGG_Glycosphingolipid_biosynthesis_ganglio_series_Main_Pathway	NA	NA	reactome_PLC_beta_mediated_events_Main_Pathway	NA	NA	NA	NA	NA	NA	NA	NA	NA	NA
reactome_Cross_presentation_of_particulate_exogenous_antigens_phagosomes__Main_Pathway	KEGG_Hepatitis_C_Main_Pathway	NA	NA	reactome_Regulation_by_c_FLIP_Main_Pathway	NA	NA	NA	NA	NA	NA	NA	NA	NA	NA
reactome_Crosslinking_of_collagen_fibrils_Main_Pathway	KEGG_HIF_1_signaling_Main_Pathway	NA	NA	reactome_Regulation_of_KIT_signaling_Main_Pathway	NA	NA	NA	NA	NA	NA	NA	NA	NA	NA
reactome_Cyclin_D_associated_events_in_G1_Main_Pathway	KEGG_Huntington_s_disease_Main_Pathway	NA	NA	reactome_RIG_I_MDA5_mediated_induction_of_IFN_alpha_beta_pathways_Main_Pathway	NA	NA	NA	NA	NA	NA	NA	NA	NA	NA
reactome_Dissolution_of_Fibrin_Clot_Main_Pathway	KEGG_Inflammatory_mediator_regulation_of_TRP_channels_Main_Pathway	NA	NA	reactome_RNA_Polymerase_I_Promoter_Opening_Main_Pathway	NA	NA	NA	NA	NA	NA	NA	NA	NA	NA
reactome_Elastic_fibre_formation_Main_Pathway	KEGG_Inositol_phosphate_metabolism_Main_Pathway	NA	NA	reactome_Signaling_by_ERBB4_Main_Pathway	NA	NA	NA	NA	NA	NA	NA	NA	NA	NA
reactome_Endosomal_Vacuolar_Main_Pathway	KEGG_Intestinal_immune_network_for_IgA_production_Main_Pathway	NA	NA	reactome_Stabilization_of_p53_Main_Pathway	NA	NA	NA	NA	NA	NA	NA	NA	NA	NA
reactome_ER_Quality_Control_Compartment_ERQC__Main_Pathway	KEGG_Legionellosis_Main_Pathway	NA	NA	reactome_Sulfide_oxidation_to_sulfate_Main_Pathway	NA	NA	NA	NA	NA	NA	NA	NA	NA	NA
reactome_FasL_CD95L_signaling_Main_Pathway	KEGG_Leishmaniasis_Main_Pathway	NA	NA	reactome_Synthesis_of_UDP_N_acetyl_glucosamine_Main_Pathway	NA	NA	NA	NA	NA	NA	NA	NA	NA	NA
reactome_Glycosphingolipid_metabolism_Main_Pathway	KEGG_Linoleic_acid_metabolism_Main_Pathway	NA	NA	reactome_The_activation_of_arylsulfatases_Main_Pathway	NA	NA	NA	NA	NA	NA	NA	NA	NA	NA
reactome_Inflammasomes_Main_Pathway	KEGG_Lysosome_Main_Pathway	NA	NA	reactome_The_NLRP1_inflammasome_Main_Pathway	NA	NA	NA	NA	NA	NA	NA	NA	NA	NA
reactome_Interconversion_of_polyamines_Main_Pathway	KEGG_Malaria_Main_Pathway	NA	NA	reactome_Toxicity_of_botulinum_toxin_type_B_BoNT_B__Main_Pathway	NA	NA	NA	NA	NA	NA	NA	NA	NA	NA
reactome_Interleukin_1_processing_Main_Pathway	KEGG_Maturity_onset_diabetes_of_the_young_Main_Pathway	NA	NA	reactome_Toxicity_of_botulinum_toxin_type_G_BoNT_G__Main_Pathway	NA	NA	NA	NA	NA	NA	NA	NA	NA	NA
reactome_Interleukin_1_signaling_Main_Pathway	KEGG_Melanogenesis_Main_Pathway	NA	NA	reactome_TRAIL_signaling_Main_Pathway	NA	NA	NA	NA	NA	NA	NA	NA	NA	NA
reactome_Interleukin_6_signaling_Main_Pathway	KEGG_MicroRNAs_in_cancer_Main_Pathway	NA	NA	reactome_Transport_and_synthesis_of_PAPS_Main_Pathway	NA	NA	NA	NA	NA	NA	NA	NA	NA	NA
reactome_IRS_activation_Main_Pathway	KEGG_Mineral_absorption_Main_Pathway	NA	NA	reactome_Transport_of_inorganic_cations_anions_and_amino_acids_oligopeptides_Main_Pathway	NA	NA	NA	NA	NA	NA	NA	NA	NA	NA
reactome_L1CAM_interactions_Main_Pathway	KEGG_Nicotinate_and_nicotinamide_metabolism_Main_Pathway	NA	NA	reactome_VEGF_binds_to_VEGFR_leading_to_receptor_dimerization_Main_Pathway	NA	NA	NA	NA	NA	NA	NA	NA	NA	NA
reactome_MyD88_dependent_cascade_initiated_on_endosome_Main_Pathway	KEGG_Notch_signaling_Main_Pathway	NA	NA	NA	NA	NA	NA	NA	NA	NA	NA	NA	NA	NA
reactome_Nectin_Necl_trans_heterodimerization_Main_Pathway	KEGG_Other_glycan_degradation_Main_Pathway	NA	NA	NA	NA	NA	NA	NA	NA	NA	NA	NA	NA	NA
reactome_Nicotinate_metabolism_Main_Pathway	KEGG_Other_types_of_O_glycan_biosynthesis_Main_Pathway	NA	NA	NA	NA	NA	NA	NA	NA	NA	NA	NA	NA	NA
reactome_Organic_anion_transporters_Main_Pathway	KEGG_Oxytocin_signaling_Main_Pathway	NA	NA	NA	NA	NA	NA	NA	NA	NA	NA	NA	NA	NA
reactome_Organic_cation_transport_Main_Pathway	KEGG_p53_signaling_Main_Pathway	NA	NA	NA	NA	NA	NA	NA	NA	NA	NA	NA	NA	NA
reactome_Oxidative_Stress_Induced_Senescence_Main_Pathway	KEGG_Pancreatic_secretion_Main_Pathway	NA	NA	NA	NA	NA	NA	NA	NA	NA	NA	NA	NA	NA
reactome_p53_Dependent_G1_DNA_Damage_Response_Main_Pathway	KEGG_Pathways_in_cancer_Main_Pathway	NA	NA	NA	NA	NA	NA	NA	NA	NA	NA	NA	NA	NA
reactome_PCP_CE_Main_Pathway	KEGG_Pertussis_Main_Pathway	NA	NA	NA	NA	NA	NA	NA	NA	NA	NA	NA	NA	NA
reactome_Plasmalogen_biosynthesis_Main_Pathway	KEGG_Phosphatidylinositol_signaling_system_Main_Pathway	NA	NA	NA	NA	NA	NA	NA	NA	NA	NA	NA	NA	NA
reactome_PLC_beta_mediated_events_Main_Pathway	KEGG_PI3K_Akt_signaling_Main_Pathway	NA	NA	NA	NA	NA	NA	NA	NA	NA	NA	NA	NA	NA
reactome_Prostanoid_ligand_receptors_Main_Pathway	KEGG_Prion_diseases_Main_Pathway	NA	NA	NA	NA	NA	NA	NA	NA	NA	NA	NA	NA	NA
reactome_Regulation_by_c_FLIP_Main_Pathway	KEGG_Prolactin_signaling_Main_Pathway	NA	NA	NA	NA	NA	NA	NA	NA	NA	NA	NA	NA	NA
reactome_Regulation_of_KIT_signaling_Main_Pathway	KEGG_Rap1_signaling_Main_Pathway	NA	NA	NA	NA	NA	NA	NA	NA	NA	NA	NA	NA	NA
reactome_RIG_I_MDA5_mediated_induction_of_IFN_alpha_beta_pathways_Main_Pathway	KEGG_Renin_angiotensin_system_Main_Pathway	NA	NA	NA	NA	NA	NA	NA	NA	NA	NA	NA	NA	NA
reactome_RNA_Polymerase_I_Promoter_Opening_Main_Pathway	KEGG_Riboflavin_metabolism_Main_Pathway	NA	NA	NA	NA	NA	NA	NA	NA	NA	NA	NA	NA	NA
reactome_Role_of_Abl_in_Robo_Slit_signaling_Main_Pathway	KEGG_Small_cell_lung_cancer_Main_Pathway	NA	NA	NA	NA	NA	NA	NA	NA	NA	NA	NA	NA	NA
reactome_SHC_activation_Main_Pathway	KEGG_Sphingolipid_metabolism_Main_Pathway	NA	NA	NA	NA	NA	NA	NA	NA	NA	NA	NA	NA	NA
reactome_Signaling_by_ERBB4_Main_Pathway	KEGG_Staphylococcus_aureus_infection_Main_Pathway	NA	NA	NA	NA	NA	NA	NA	NA	NA	NA	NA	NA	NA
reactome_Stabilization_of_p53_Main_Pathway	KEGG_Starch_and_sucrose_metabolism_Main_Pathway	NA	NA	NA	NA	NA	NA	NA	NA	NA	NA	NA	NA	NA
reactome_Sulfide_oxidation_to_sulfate_Main_Pathway	KEGG_Steroid_biosynthesis_Main_Pathway	NA	NA	NA	NA	NA	NA	NA	NA	NA	NA	NA	NA	NA
reactome_Synthesis_of_UDP_N_acetyl_glucosamine_Main_Pathway	KEGG_Steroid_hormone_biosynthesis_Main_Pathway	NA	NA	NA	NA	NA	NA	NA	NA	NA	NA	NA	NA	NA
reactome_The_activation_of_arylsulfatases_Main_Pathway	KEGG_Sulfur_metabolism_Main_Pathway	NA	NA	NA	NA	NA	NA	NA	NA	NA	NA	NA	NA	NA
reactome_The_NLRP1_inflammasome_Main_Pathway	KEGG_Synaptic_vesicle_cycle_Main_Pathway	NA	NA	NA	NA	NA	NA	NA	NA	NA	NA	NA	NA	NA
reactome_Toxicity_of_botulinum_toxin_type_B_BoNT_B__Main_Pathway	KEGG_Systemic_lupus_erythematosus_Main_Pathway	NA	NA	NA	NA	NA	NA	NA	NA	NA	NA	NA	NA	NA
reactome_Toxicity_of_botulinum_toxin_type_G_BoNT_G__Main_Pathway	KEGG_Thyroid_hormone_synthesis_Main_Pathway	NA	NA	NA	NA	NA	NA	NA	NA	NA	NA	NA	NA	NA
reactome_TRAIL_signaling_Main_Pathway	KEGG_Type_I_diabetes_mellitus_Main_Pathway	NA	NA	NA	NA	NA	NA	NA	NA	NA	NA	NA	NA	NA
reactome_Transport_and_synthesis_of_PAPS_Main_Pathway	KEGG_Wnt_signaling_Main_Pathway	NA	NA	NA	NA	NA	NA	NA	NA	NA	NA	NA	NA	NA
reactome_Transport_of_inorganic_cations_anions_and_amino_acids_oligopeptides_Main_Pathway	MAPK_Signaling_Pathway	NA	NA	NA	NA	NA	NA	NA	NA	NA	NA	NA	NA	NA
reactome_VEGF_binds_to_VEGFR_leading_to_receptor_dimerization_Main_Pathway	MAPK_Signaling_Pathway_Cell_Motility_Inflammation_Apoptosis_Osmoregulation	NA	NA	NA	NA	NA	NA	NA	NA	NA	NA	NA	NA	NA
TRAF_Pathway_Direct_Antimicrobial_Response_and_Cell-Mediated_Immunity_and_Apoptosis_of_Host_Cell	MAPK_Signaling_Pathway_Gene_Expression_Cell_Proliferation_Cell_Survival_Tumorigenesis_Differentiation_Development_via_PXN_CREB3_RPS6KA5_RPS6KA6	NA	NA	NA	NA	NA	NA	NA	NA	NA	NA	NA	NA	NA
NA	Mitochondrial_Apoptosis_Pathway_Apoptosis	NA	NA	NA	NA	NA	NA	NA	NA	NA	NA	NA	NA	NA
NA	Mitochondrial_Apoptosis_Pathway_DNA_Fragmentation	NA	NA	NA	NA	NA	NA	NA	NA	NA	NA	NA	NA	NA
NA	mTOR_Pathway	NA	NA	NA	NA	NA	NA	NA	NA	NA	NA	NA	NA	NA
NA	mTOR_Pathway_Lipid_Synthesis	NA	NA	NA	NA	NA	NA	NA	NA	NA	NA	NA	NA	NA
NA	NCI_ALK1_signaling_events_Main_Pathway	NA	NA	NA	NA	NA	NA	NA	NA	NA	NA	NA	NA	NA
NA	NCI_ALK1_signaling_events_Pathway_(endothelial_cell_migration)	NA	NA	NA	NA	NA	NA	NA	NA	NA	NA	NA	NA	NA
NA	NCI_ALK1_signaling_events_Pathway_(endothelial_cell_proliferation)	NA	NA	NA	NA	NA	NA	NA	NA	NA	NA	NA	NA	NA
NA	NCI_ALK1_signaling_events_Pathway_(sprouting_angiogenesis)	NA	NA	NA	NA	NA	NA	NA	NA	NA	NA	NA	NA	NA
NA	NCI_Alpha_synuclein_signaling_Pathway_(neuron_apoptosis)	NA	NA	NA	NA	NA	NA	NA	NA	NA	NA	NA	NA	NA
NA	NCI_Alpha6_beta4_integrin_ligand_interactions_Main_Pathway	NA	NA	NA	NA	NA	NA	NA	NA	NA	NA	NA	NA	NA
NA	NCI_AlphaE_beta7_integrin_cell_surface_interactions_Main_Pathway	NA	NA	NA	NA	NA	NA	NA	NA	NA	NA	NA	NA	NA
NA	NCI_amb2_Integrin_signaling_Main_Pathway	NA	NA	NA	NA	NA	NA	NA	NA	NA	NA	NA	NA	NA
NA	NCI_Angiopoietin_receptor_Tie2_mediated_signaling_Main_Pathway	NA	NA	NA	NA	NA	NA	NA	NA	NA	NA	NA	NA	NA
NA	NCI_Angiopoietin_receptor_Tie2_mediated_signaling_Pathway_(chemokinesis)	NA	NA	NA	NA	NA	NA	NA	NA	NA	NA	NA	NA	NA
NA	NCI_Angiopoietin_receptor_Tie2_mediated_signaling_Pathway_(negative_regulation_of_caspase_activity)	NA	NA	NA	NA	NA	NA	NA	NA	NA	NA	NA	NA	NA
NA	NCI_Arf6_downstream_Pathway_(cortical_actin_cytoskeleton_organization)	NA	NA	NA	NA	NA	NA	NA	NA	NA	NA	NA	NA	NA
NA	NCI_Arf6_downstream_Pathway_(lamellipodium_assembly)	NA	NA	NA	NA	NA	NA	NA	NA	NA	NA	NA	NA	NA
NA	NCI_Arf6_trafficking_events_Pathway_(calcium_ion_dependent_exocytosis)	NA	NA	NA	NA	NA	NA	NA	NA	NA	NA	NA	NA	NA
NA	NCI_Arf6_trafficking_events_Pathway_(endocytosis)	NA	NA	NA	NA	NA	NA	NA	NA	NA	NA	NA	NA	NA
NA	NCI_Arf6_trafficking_events_Pathway_(regulation_of_calcium_dependent_cell_cell_adhesion)	NA	NA	NA	NA	NA	NA	NA	NA	NA	NA	NA	NA	NA
NA	NCI_Beta1_integrin_cell_surface_interactions_Main_Pathway	NA	NA	NA	NA	NA	NA	NA	NA	NA	NA	NA	NA	NA
NA	NCI_Beta2_integrin_cell_surface_interactions_Main_Pathway	NA	NA	NA	NA	NA	NA	NA	NA	NA	NA	NA	NA	NA
NA	NCI_Beta3_integrin_cell_surface_interactions_Main_Pathway	NA	NA	NA	NA	NA	NA	NA	NA	NA	NA	NA	NA	NA
NA	NCI_Beta5_beta6_beta7_and_beta8_integrin_cell_surface_interactions_Main_Pathway	NA	NA	NA	NA	NA	NA	NA	NA	NA	NA	NA	NA	NA
NA	NCI_Caspase_Cascade_in_Apoptosis_Main_Pathway	NA	NA	NA	NA	NA	NA	NA	NA	NA	NA	NA	NA	NA
NA	NCI_Caspase_Cascade_in_Apoptosis_Pathway_(apoptotic_nuclear_changes)	NA	NA	NA	NA	NA	NA	NA	NA	NA	NA	NA	NA	NA
NA	NCI_CD40_CD40L_signaling_Pathway_(B_cell_affinity_maturation)	NA	NA	NA	NA	NA	NA	NA	NA	NA	NA	NA	NA	NA
NA	NCI_CD40_CD40L_signaling_Pathway_(plasma_cell_differentiation)	NA	NA	NA	NA	NA	NA	NA	NA	NA	NA	NA	NA	NA
NA	NCI_CDC42_signaling_events_Pathway_(cell_motility)	NA	NA	NA	NA	NA	NA	NA	NA	NA	NA	NA	NA	NA
NA	NCI_CDC42_signaling_events_Pathway_(cell_proliferation)	NA	NA	NA	NA	NA	NA	NA	NA	NA	NA	NA	NA	NA
NA	NCI_CDC42_signaling_events_Pathway_(cytokinesis)	NA	NA	NA	NA	NA	NA	NA	NA	NA	NA	NA	NA	NA
NA	NCI_CDC42_signaling_events_Pathway_(establishment_of_cell_polarity)	NA	NA	NA	NA	NA	NA	NA	NA	NA	NA	NA	NA	NA
NA	NCI_CDC42_signaling_events_Pathway_(Pathway_positive_regulation_of_NF_kappaB_transcription_factor_activity_via_CDC42)	NA	NA	NA	NA	NA	NA	NA	NA	NA	NA	NA	NA	NA
NA	NCI_Cellular_roles_of_Anthrax_toxin_Main_Pathway	NA	NA	NA	NA	NA	NA	NA	NA	NA	NA	NA	NA	NA
NA	NCI_Cellular_roles_of_Anthrax_toxin_Pathway_(apoptosis)	NA	NA	NA	NA	NA	NA	NA	NA	NA	NA	NA	NA	NA
NA	NCI_Cellular_roles_of_Anthrax_toxin_Pathway_(inflammatory_response)	NA	NA	NA	NA	NA	NA	NA	NA	NA	NA	NA	NA	NA
NA	NCI_Cellular_roles_of_Anthrax_toxin_Pathway_(macrophage_activation)	NA	NA	NA	NA	NA	NA	NA	NA	NA	NA	NA	NA	NA
NA	NCI_Cellular_roles_of_Anthrax_toxin_Pathway_(MAPKKK_cascade)	NA	NA	NA	NA	NA	NA	NA	NA	NA	NA	NA	NA	NA
NA	NCI_Cellular_roles_of_Anthrax_toxin_Pathway_(monocyte_activation)	NA	NA	NA	NA	NA	NA	NA	NA	NA	NA	NA	NA	NA
NA	NCI_Cellular_roles_of_Anthrax_toxin_Pathway_(necrosis)	NA	NA	NA	NA	NA	NA	NA	NA	NA	NA	NA	NA	NA
NA	NCI_Cellular_roles_of_Anthrax_toxin_Pathway_(negative_regulation_of_macrophage_activation)	NA	NA	NA	NA	NA	NA	NA	NA	NA	NA	NA	NA	NA
NA	NCI_Cellular_roles_of_Anthrax_toxin_Pathway_(negative_regulation_of_myeloid_dendritic_cell_antigen_processing_and_presentation)	NA	NA	NA	NA	NA	NA	NA	NA	NA	NA	NA	NA	NA
NA	NCI_Cellular_roles_of_Anthrax_toxin_Pathway_(negative_regulation_of_phagocytosis)	NA	NA	NA	NA	NA	NA	NA	NA	NA	NA	NA	NA	NA
NA	NCI_Cellular_roles_of_Anthrax_toxin_Pathway_(platelet_activation)	NA	NA	NA	NA	NA	NA	NA	NA	NA	NA	NA	NA	NA
NA	NCI_Cellular_roles_of_Anthrax_toxin_Pathway_(regulation_of_endothelial_cell_proliferation)	NA	NA	NA	NA	NA	NA	NA	NA	NA	NA	NA	NA	NA
NA	NCI_Class_I_PI3K_signaling_events_mediated_by_Akt_Main_Pathway	NA	NA	NA	NA	NA	NA	NA	NA	NA	NA	NA	NA	NA
NA	NCI_Class_I_PI3K_signaling_events_mediated_by_Akt_Pathway_(negative_regulation_of_cell_cycle)	NA	NA	NA	NA	NA	NA	NA	NA	NA	NA	NA	NA	NA
NA	NCI_Class_I_PI3K_signaling_events_Pathway_(cell_survival)	NA	NA	NA	NA	NA	NA	NA	NA	NA	NA	NA	NA	NA
NA	NCI_Coregulation_of_Androgen_receptor_activity_Main_Pathway	NA	NA	NA	NA	NA	NA	NA	NA	NA	NA	NA	NA	NA
NA	NCI_Coregulation_of_Androgen_receptor_activity_Pathway_(cell_proliferation)	NA	NA	NA	NA	NA	NA	NA	NA	NA	NA	NA	NA	NA
NA	NCI_CXCR3_mediated_signaling_events_Pathway_(cAMP_biosynthetic_process)	NA	NA	NA	NA	NA	NA	NA	NA	NA	NA	NA	NA	NA
NA	NCI_CXCR3_mediated_signaling_events_Pathway_(regulation_of_stress_fiber_assembly)	NA	NA	NA	NA	NA	NA	NA	NA	NA	NA	NA	NA	NA
NA	NCI_E_cadherin_signaling_in_keratinocytes_Main_Pathway	NA	NA	NA	NA	NA	NA	NA	NA	NA	NA	NA	NA	NA
NA	NCI_E_cadherin_signaling_in_keratinocytes_Pathway_(actin_cable_formation)	NA	NA	NA	NA	NA	NA	NA	NA	NA	NA	NA	NA	NA
NA	NCI_E_cadherin_signaling_in_keratinocytes_Pathway_(adherens_junction_organization)	NA	NA	NA	NA	NA	NA	NA	NA	NA	NA	NA	NA	NA
NA	NCI_E_cadherin_signaling_in_keratinocytes_Pathway_(apoptosis)	NA	NA	NA	NA	NA	NA	NA	NA	NA	NA	NA	NA	NA
NA	NCI_E_cadherin_signaling_in_keratinocytes_Pathway_(establishment_of_polarity_of_embryonic_epithelium)	NA	NA	NA	NA	NA	NA	NA	NA	NA	NA	NA	NA	NA
NA	NCI_E_cadherin_signaling_in_keratinocytes_Pathway_(keratinocyte_differentiation)	NA	NA	NA	NA	NA	NA	NA	NA	NA	NA	NA	NA	NA
NA	NCI_E_cadherin_signaling_in_the_nascent_adherens_junction_Main_Pathway	NA	NA	NA	NA	NA	NA	NA	NA	NA	NA	NA	NA	NA
NA	NCI_E_cadherin_signaling_in_the_nascent_adherens_junction_Pathway_(regulation_of_actin_nucleation)	NA	NA	NA	NA	NA	NA	NA	NA	NA	NA	NA	NA	NA
NA	NCI_E2F_transcription_factor_network_Main_Pathway	NA	NA	NA	NA	NA	NA	NA	NA	NA	NA	NA	NA	NA
NA	NCI_Effects_of_Botulinum_toxin_Main_Pathway	NA	NA	NA	NA	NA	NA	NA	NA	NA	NA	NA	NA	NA
NA	NCI_EGFR_dependent_Endothelin_signaling_events_Main_Pathway	NA	NA	NA	NA	NA	NA	NA	NA	NA	NA	NA	NA	NA
NA	NCI_Endogenous_TLR_signaling_Main_Pathway	NA	NA	NA	NA	NA	NA	NA	NA	NA	NA	NA	NA	NA
NA	NCI_Endogenous_TLR_signaling_Pathway_(cell_migration)	NA	NA	NA	NA	NA	NA	NA	NA	NA	NA	NA	NA	NA
NA	NCI_Endogenous_TLR_signaling_Pathway_(regulation_of_apoptosis)	NA	NA	NA	NA	NA	NA	NA	NA	NA	NA	NA	NA	NA
NA	NCI_Endogenous_TLR_signaling_Pathway_(regulation_of_cell_matrix_adhesion)	NA	NA	NA	NA	NA	NA	NA	NA	NA	NA	NA	NA	NA
NA	NCI_Endogenous_TLR_signaling_Pathway_(regulation_of_cell_proliferation)	NA	NA	NA	NA	NA	NA	NA	NA	NA	NA	NA	NA	NA
NA	NCI_Endogenous_TLR_signaling_Pathway_(regulation_of_interleukin_1_beta_production)	NA	NA	NA	NA	NA	NA	NA	NA	NA	NA	NA	NA	NA
NA	NCI_Endogenous_TLR_signaling_Pathway_(respiratory_burst_involved_in_inflammatory_response)	NA	NA	NA	NA	NA	NA	NA	NA	NA	NA	NA	NA	NA
NA	NCI_Endothelins_Main_Pathway	NA	NA	NA	NA	NA	NA	NA	NA	NA	NA	NA	NA	NA
NA	NCI_Endothelins_Pathway_(cAMP_biosynthetic_process)	NA	NA	NA	NA	NA	NA	NA	NA	NA	NA	NA	NA	NA
NA	NCI_Endothelins_Pathway_(positive_regulation_of_muscle_contraction)	NA	NA	NA	NA	NA	NA	NA	NA	NA	NA	NA	NA	NA
NA	NCI_EPHA_forward_signaling_Pathway_(proteasomal_ubiquitin_dependent_protein_catabolic_process)	NA	NA	NA	NA	NA	NA	NA	NA	NA	NA	NA	NA	NA
NA	NCI_EPHA2_forward_signaling_Main_Pathway	NA	NA	NA	NA	NA	NA	NA	NA	NA	NA	NA	NA	NA
NA	NCI_Ephrin_A_reverse_signaling_Main_Pathway	NA	NA	NA	NA	NA	NA	NA	NA	NA	NA	NA	NA	NA
NA	NCI_Ephrin_A_reverse_signaling_Pathway_(beta_integrin_mediated_adhesion)	NA	NA	NA	NA	NA	NA	NA	NA	NA	NA	NA	NA	NA
NA	NCI_Ephrin_A_reverse_signaling_Pathway_(MAPKKK_cascade)	NA	NA	NA	NA	NA	NA	NA	NA	NA	NA	NA	NA	NA
NA	NCI_Ephrin_A_reverse_signaling_Pathway_(neuron_projection_morphogenesis)	NA	NA	NA	NA	NA	NA	NA	NA	NA	NA	NA	NA	NA
NA	NCI_EPO_signaling_Pathway_(cell_proliferation)	NA	NA	NA	NA	NA	NA	NA	NA	NA	NA	NA	NA	NA
NA	NCI_ErbB_receptor_signaling_network_Main_Pathway	NA	NA	NA	NA	NA	NA	NA	NA	NA	NA	NA	NA	NA
NA	NCI_ErbB1_downstream_signaling_Pathway_(cytoskeleton_organization)	NA	NA	NA	NA	NA	NA	NA	NA	NA	NA	NA	NA	NA
NA	NCI_ErbB4_signaling_events_Main_Pathway	NA	NA	NA	NA	NA	NA	NA	NA	NA	NA	NA	NA	NA
NA	NCI_ErbB4_signaling_events_Pathway_(apoptosis)	NA	NA	NA	NA	NA	NA	NA	NA	NA	NA	NA	NA	NA
NA	NCI_ErbB4_signaling_events_Pathway_(axon_guidance)	NA	NA	NA	NA	NA	NA	NA	NA	NA	NA	NA	NA	NA
NA	NCI_ErbB4_signaling_events_Pathway_(cell_proliferation)	NA	NA	NA	NA	NA	NA	NA	NA	NA	NA	NA	NA	NA
NA	NCI_ErbB4_signaling_events_Pathway_(chemotaxis)	NA	NA	NA	NA	NA	NA	NA	NA	NA	NA	NA	NA	NA
NA	NCI_ErbB4_signaling_events_Pathway_(dendrite_morphogenesis)	NA	NA	NA	NA	NA	NA	NA	NA	NA	NA	NA	NA	NA
NA	NCI_ErbB4_signaling_events_Pathway_(epithelial_cell_differentiation)	NA	NA	NA	NA	NA	NA	NA	NA	NA	NA	NA	NA	NA
NA	NCI_ErbB4_signaling_events_Pathway_(glial_cell_differentiation)	NA	NA	NA	NA	NA	NA	NA	NA	NA	NA	NA	NA	NA
NA	NCI_ErbB4_signaling_events_Pathway_(heart_development)	NA	NA	NA	NA	NA	NA	NA	NA	NA	NA	NA	NA	NA
NA	NCI_ErbB4_signaling_events_Pathway_(neural_crest_cell_migration)	NA	NA	NA	NA	NA	NA	NA	NA	NA	NA	NA	NA	NA
NA	NCI_FAS_CD95_signaling_Main_Pathway	NA	NA	NA	NA	NA	NA	NA	NA	NA	NA	NA	NA	NA
NA	NCI_FAS_CD95_signaling_Pathway_(necroptosis)	NA	NA	NA	NA	NA	NA	NA	NA	NA	NA	NA	NA	NA
NA	NCI_FAS_CD95_signaling_Pathway_(neuron_projection_development)	NA	NA	NA	NA	NA	NA	NA	NA	NA	NA	NA	NA	NA
NA	NCI_Glypican_1_network_Main_Pathway	NA	NA	NA	NA	NA	NA	NA	NA	NA	NA	NA	NA	NA
NA	NCI_Glypican_1_network_Pathway_(BMP_signaling_pathway)	NA	NA	NA	NA	NA	NA	NA	NA	NA	NA	NA	NA	NA
NA	NCI_Glypican_1_network_Pathway_(cell_growth)	NA	NA	NA	NA	NA	NA	NA	NA	NA	NA	NA	NA	NA
NA	NCI_Glypican_1_network_Pathway_(fibroblast_growth_factor_receptor_signaling_pathway)	NA	NA	NA	NA	NA	NA	NA	NA	NA	NA	NA	NA	NA
NA	NCI_IFN_gamma_Main_Pathway	NA	NA	NA	NA	NA	NA	NA	NA	NA	NA	NA	NA	NA
NA	NCI_IFN_gamma_Pathway_(Antibacterial_Response)	NA	NA	NA	NA	NA	NA	NA	NA	NA	NA	NA	NA	NA
NA	NCI_IFN_gamma_Pathway_(antigen_processing_and_presentation_of_peptide_antigen_via_MHC_class_I)	NA	NA	NA	NA	NA	NA	NA	NA	NA	NA	NA	NA	NA
NA	NCI_IFN_gamma_Pathway_(antigen_processing_and_presentation_of_peptide_antigen_via_MHC_class_II)	NA	NA	NA	NA	NA	NA	NA	NA	NA	NA	NA	NA	NA
NA	NCI_IFN_gamma_Pathway_(Antiviral_Response)	NA	NA	NA	NA	NA	NA	NA	NA	NA	NA	NA	NA	NA
NA	NCI_IFN_gamma_Pathway_(apoptosis)	NA	NA	NA	NA	NA	NA	NA	NA	NA	NA	NA	NA	NA
NA	NCI_IFN_gamma_Pathway_(Immunoregulation)	NA	NA	NA	NA	NA	NA	NA	NA	NA	NA	NA	NA	NA
NA	NCI_IFN_gamma_Pathway_(negative_regulation_of_cell_growth)	NA	NA	NA	NA	NA	NA	NA	NA	NA	NA	NA	NA	NA
NA	NCI_IGF1_Pathway_(positive_regulation_of_MAPKKK_cascade)	NA	NA	NA	NA	NA	NA	NA	NA	NA	NA	NA	NA	NA
NA	NCI_IL12_signaling_mediated_by_STAT4_Main_Pathway	NA	NA	NA	NA	NA	NA	NA	NA	NA	NA	NA	NA	NA
NA	NCI_IL12_signaling_mediated_by_STAT4_Pathway_(natural_killer_cell_mediated_cytotoxicity)	NA	NA	NA	NA	NA	NA	NA	NA	NA	NA	NA	NA	NA
NA	NCI_IL12_signaling_mediated_by_STAT4_Pathway_(T_helper_1_cell_differentiation)	NA	NA	NA	NA	NA	NA	NA	NA	NA	NA	NA	NA	NA
NA	NCI_IL12_signaling_mediated_by_STAT4_Pathway_(T_helper_2_cell_differentiation)	NA	NA	NA	NA	NA	NA	NA	NA	NA	NA	NA	NA	NA
NA	NCI_IL27_mediated_signaling_events_Main_Pathway	NA	NA	NA	NA	NA	NA	NA	NA	NA	NA	NA	NA	NA
NA	NCI_IL27_mediated_signaling_events_Pathway_(cytokine_production_during_immune_response)	NA	NA	NA	NA	NA	NA	NA	NA	NA	NA	NA	NA	NA
NA	NCI_IL27_mediated_signaling_events_Pathway_(MAPKKK_cascade)	NA	NA	NA	NA	NA	NA	NA	NA	NA	NA	NA	NA	NA
NA	NCI_IL27_mediated_signaling_events_Pathway_(mast_cell_activation)	NA	NA	NA	NA	NA	NA	NA	NA	NA	NA	NA	NA	NA
NA	NCI_IL27_mediated_signaling_events_Pathway_(positive_regulation_of_mast_cell_cytokine_production)	NA	NA	NA	NA	NA	NA	NA	NA	NA	NA	NA	NA	NA
NA	NCI_IL27_mediated_signaling_events_Pathway_(positive_regulation_of_T_cell_mediated_cytotoxicity)	NA	NA	NA	NA	NA	NA	NA	NA	NA	NA	NA	NA	NA
NA	NCI_IL27_mediated_signaling_events_Pathway_(T_cell_proliferation)	NA	NA	NA	NA	NA	NA	NA	NA	NA	NA	NA	NA	NA
NA	NCI_IL27_mediated_signaling_events_Pathway_(T_cell_proliferation_during_immune_response)	NA	NA	NA	NA	NA	NA	NA	NA	NA	NA	NA	NA	NA
NA	NCI_IL27_mediated_signaling_events_Pathway_(T_helper_2_cell_differentiation)	NA	NA	NA	NA	NA	NA	NA	NA	NA	NA	NA	NA	NA
NA	NCI_IL5_mediated_signaling_events_Main_Pathway	NA	NA	NA	NA	NA	NA	NA	NA	NA	NA	NA	NA	NA
NA	NCI_IL5_mediated_signaling_events_Pathway_(proteasomal_ubiquitin_dependent_protein_catabolic_process)	NA	NA	NA	NA	NA	NA	NA	NA	NA	NA	NA	NA	NA
NA	NCI_IL5_mediated_signaling_events_Pathway_(regulation_of_isotype_switching_to_IgG_isotypes)	NA	NA	NA	NA	NA	NA	NA	NA	NA	NA	NA	NA	NA
NA	NCI_IL6_mediated_signaling_events_Pathway_(cell_cycle_arrest)	NA	NA	NA	NA	NA	NA	NA	NA	NA	NA	NA	NA	NA
NA	NCI_IL6_mediated_signaling_events_Pathway_(cell_survival)	NA	NA	NA	NA	NA	NA	NA	NA	NA	NA	NA	NA	NA
NA	NCI_IL6_mediated_signaling_events_Pathway_(macrophage_differentiation)	NA	NA	NA	NA	NA	NA	NA	NA	NA	NA	NA	NA	NA
NA	NCI_Insulin_mediated_glucose_transport_Main_Pathway	NA	NA	NA	NA	NA	NA	NA	NA	NA	NA	NA	NA	NA
NA	NCI_Insulin_Pathway_Pathway_(negative_regulation_of_MAPKKK_cascade)	NA	NA	NA	NA	NA	NA	NA	NA	NA	NA	NA	NA	NA
NA	NCI_Integrin_linked_kinase_signaling_Main_Pathway	NA	NA	NA	NA	NA	NA	NA	NA	NA	NA	NA	NA	NA
NA	NCI_Integrins_in_angiogenesis_Main_Pathway	NA	NA	NA	NA	NA	NA	NA	NA	NA	NA	NA	NA	NA
NA	NCI_Integrins_in_angiogenesis_Pathway_(angiogenesis)	NA	NA	NA	NA	NA	NA	NA	NA	NA	NA	NA	NA	NA
NA	NCI_Internalization_of_ErbB1_Main_Pathway	NA	NA	NA	NA	NA	NA	NA	NA	NA	NA	NA	NA	NA
NA	NCI_Lissencephaly_gene_LIS1_in_neuronal_migration_and_development_Pathway_(microtubule_based_movement)	NA	NA	NA	NA	NA	NA	NA	NA	NA	NA	NA	NA	NA
NA	NCI_N_cadherin_signaling_events_Main_Pathway	NA	NA	NA	NA	NA	NA	NA	NA	NA	NA	NA	NA	NA
NA	NCI_N_cadherin_signaling_events_Pathway_(actin_filament_polymerization)	NA	NA	NA	NA	NA	NA	NA	NA	NA	NA	NA	NA	NA
NA	NCI_N_cadherin_signaling_events_Pathway_(regulation_of_cell_cell_adhesion)	NA	NA	NA	NA	NA	NA	NA	NA	NA	NA	NA	NA	NA
NA	NCI_N_cadherin_signaling_events_Pathway_(regulation_of_synapse_organization)	NA	NA	NA	NA	NA	NA	NA	NA	NA	NA	NA	NA	NA
NA	NCI_Neurotrophic_factor_mediated_Trk_receptor_signaling_Pathway_(axon_guidance)	NA	NA	NA	NA	NA	NA	NA	NA	NA	NA	NA	NA	NA
NA	NCI_Neurotrophic_factor_mediated_Trk_receptor_signaling_Pathway_(MAPKKK_cascade)	NA	NA	NA	NA	NA	NA	NA	NA	NA	NA	NA	NA	NA
NA	NCI_Nongenotropic_Androgen_signaling_Pathway_(actin_cytoskeleton_reorganization)	NA	NA	NA	NA	NA	NA	NA	NA	NA	NA	NA	NA	NA
NA	NCI_Notch_mediated_HES_HEY_network_Pathway_(Pathway_degradation_of_HEY1)	NA	NA	NA	NA	NA	NA	NA	NA	NA	NA	NA	NA	NA
NA	NCI_Notch_signaling_Main_Pathway	NA	NA	NA	NA	NA	NA	NA	NA	NA	NA	NA	NA	NA
NA	NCI_Notch_signaling_Pathway_(Bergmann_glial_cell_differentiation)	NA	NA	NA	NA	NA	NA	NA	NA	NA	NA	NA	NA	NA
NA	NCI_Notch_signaling_Pathway_(oligodendrocyte_development)	NA	NA	NA	NA	NA	NA	NA	NA	NA	NA	NA	NA	NA
NA	NCI_Osteopontin_mediated_events_Main_Pathway	NA	NA	NA	NA	NA	NA	NA	NA	NA	NA	NA	NA	NA
NA	NCI_Osteopontin_mediated_events_Pathway_(bone_resorption)	NA	NA	NA	NA	NA	NA	NA	NA	NA	NA	NA	NA	NA
NA	NCI_Osteopontin_mediated_events_Pathway_(ruffle_organization)	NA	NA	NA	NA	NA	NA	NA	NA	NA	NA	NA	NA	NA
NA	NCI_p38_signaling_mediated_by_MAPKAP_kinases_Main_Pathway	NA	NA	NA	NA	NA	NA	NA	NA	NA	NA	NA	NA	NA
NA	NCI_p38_signaling_mediated_by_MAPKAP_kinases_Pathway_(regulation_of_mRNA_stability)	NA	NA	NA	NA	NA	NA	NA	NA	NA	NA	NA	NA	NA
NA	NCI_p53_Main_Pathway	NA	NA	NA	NA	NA	NA	NA	NA	NA	NA	NA	NA	NA
NA	NCI_p53_Pathway_(apoptosis)	NA	NA	NA	NA	NA	NA	NA	NA	NA	NA	NA	NA	NA
NA	NCI_p53_Pathway_(proteasomal_ubiquitin_dependent_protein_catabolic_process)	NA	NA	NA	NA	NA	NA	NA	NA	NA	NA	NA	NA	NA
NA	NCI_p73_transcription_factor_network_Main_Pathway	NA	NA	NA	NA	NA	NA	NA	NA	NA	NA	NA	NA	NA
NA	NCI_p73_transcription_factor_network_Pathway_(apoptosis)	NA	NA	NA	NA	NA	NA	NA	NA	NA	NA	NA	NA	NA
NA	NCI_Plexin_D1_Signaling_Pathway_(receptor_recycling)	NA	NA	NA	NA	NA	NA	NA	NA	NA	NA	NA	NA	NA
NA	NCI_PLK3_signaling_events_Main_Pathway	NA	NA	NA	NA	NA	NA	NA	NA	NA	NA	NA	NA	NA
NA	NCI_Posttranslational_regulation_of_adherens_junction_stability_and_dissassembly_Main_Pathway	NA	NA	NA	NA	NA	NA	NA	NA	NA	NA	NA	NA	NA
NA	NCI_Regulation_of_Androgen_receptor_activity_Main_Pathway	NA	NA	NA	NA	NA	NA	NA	NA	NA	NA	NA	NA	NA
NA	NCI_Regulation_of_Androgen_receptor_activity_Pathway_(cell_proliferation)	NA	NA	NA	NA	NA	NA	NA	NA	NA	NA	NA	NA	NA
NA	NCI_Regulation_of_CDC42_activity_Main_Pathway	NA	NA	NA	NA	NA	NA	NA	NA	NA	NA	NA	NA	NA
NA	NCI_Regulation_of_p38_alpha_and_p38_beta_Main_Pathway	NA	NA	NA	NA	NA	NA	NA	NA	NA	NA	NA	NA	NA
NA	NCI_Regulation_of_p38_alpha_and_p38_beta_Pathway_(positive_regulation_of_innate_immune_response)	NA	NA	NA	NA	NA	NA	NA	NA	NA	NA	NA	NA	NA
NA	NCI_Regulation_of_RAC1_activity_Main_Pathway	NA	NA	NA	NA	NA	NA	NA	NA	NA	NA	NA	NA	NA
NA	NCI_Regulation_of_RhoA_activity_Main_Pathway	NA	NA	NA	NA	NA	NA	NA	NA	NA	NA	NA	NA	NA
NA	NCI_Regulation_of_Telomerase_Pathway_(cell_cycle)	NA	NA	NA	NA	NA	NA	NA	NA	NA	NA	NA	NA	NA
NA	NCI_Role_of_Calcineurin_dependent_NFAT_signaling_in_lymphocytes_Pathway_(apoptosis)	NA	NA	NA	NA	NA	NA	NA	NA	NA	NA	NA	NA	NA
NA	NCI_S1P1_Pathway_(receptor_internalization)	NA	NA	NA	NA	NA	NA	NA	NA	NA	NA	NA	NA	NA
NA	NCI_SHP2_signaling_Main_Pathway	NA	NA	NA	NA	NA	NA	NA	NA	NA	NA	NA	NA	NA
NA	NCI_Signaling_events_mediated_by_HDAC_Class_III_Main_Pathway	NA	NA	NA	NA	NA	NA	NA	NA	NA	NA	NA	NA	NA
NA	NCI_Signaling_events_mediated_by_HDAC_Class_III_Pathway_(regulation_of_S_phase_of_mitotic_cell_cycle)	NA	NA	NA	NA	NA	NA	NA	NA	NA	NA	NA	NA	NA
NA	NCI_Signaling_events_mediated_by_PRL_Pathway_(cell_motility)	NA	NA	NA	NA	NA	NA	NA	NA	NA	NA	NA	NA	NA
NA	NCI_Signaling_events_mediated_by_PRL_Pathway_(mitosis)	NA	NA	NA	NA	NA	NA	NA	NA	NA	NA	NA	NA	NA
NA	NCI_Signaling_events_mediated_by_Stem_cell_factor_receptor_c_Kit__Main_Pathway	NA	NA	NA	NA	NA	NA	NA	NA	NA	NA	NA	NA	NA
NA	NCI_Signaling_events_mediated_by_Stem_cell_factor_receptor_c_Kit__Pathway_(actin_filament_polymerization)	NA	NA	NA	NA	NA	NA	NA	NA	NA	NA	NA	NA	NA
NA	NCI_Signaling_events_mediated_by_Stem_cell_factor_receptor_c_Kit__Pathway_(cell_migration)	NA	NA	NA	NA	NA	NA	NA	NA	NA	NA	NA	NA	NA
NA	NCI_Signaling_events_mediated_by_Stem_cell_factor_receptor_c_Kit__Pathway_(cell_motility)	NA	NA	NA	NA	NA	NA	NA	NA	NA	NA	NA	NA	NA
NA	NCI_Signaling_events_mediated_by_Stem_cell_factor_receptor_c_Kit__Pathway_(cell_proliferation)	NA	NA	NA	NA	NA	NA	NA	NA	NA	NA	NA	NA	NA
NA	NCI_Signaling_events_mediated_by_Stem_cell_factor_receptor_c_Kit__Pathway_(megakaryocyte_differentiation)	NA	NA	NA	NA	NA	NA	NA	NA	NA	NA	NA	NA	NA
NA	NCI_Signaling_events_mediated_by_Stem_cell_factor_receptor_c_Kit__Pathway_(Pathway_positive_regulation_of_transcription_via_MAPK3)	NA	NA	NA	NA	NA	NA	NA	NA	NA	NA	NA	NA	NA
NA	NCI_Signaling_events_mediated_by_Stem_cell_factor_receptor_c_Kit__Pathway_(positive_regulation_of_cell_proliferation)	NA	NA	NA	NA	NA	NA	NA	NA	NA	NA	NA	NA	NA
NA	NCI_Signaling_events_mediated_by_Stem_cell_factor_receptor_c_Kit__Pathway_(response_to_radiation)	NA	NA	NA	NA	NA	NA	NA	NA	NA	NA	NA	NA	NA
NA	NCI_Signaling_events_mediated_by_VEGFR1_and_VEGFR2_Pathway_(cell_proliferation)	NA	NA	NA	NA	NA	NA	NA	NA	NA	NA	NA	NA	NA
NA	NCI_Signaling_events_mediated_by_VEGFR1_and_VEGFR2_Pathway_(stress_fiber_assembly)	NA	NA	NA	NA	NA	NA	NA	NA	NA	NA	NA	NA	NA
NA	NCI_Signaling_events_regulated_by_Ret_tyrosine_kinase_Main_Pathway	NA	NA	NA	NA	NA	NA	NA	NA	NA	NA	NA	NA	NA
NA	NCI_Signaling_events_regulated_by_Ret_tyrosine_kinase_Pathway_(activation_of_MAPKK_activity)	NA	NA	NA	NA	NA	NA	NA	NA	NA	NA	NA	NA	NA
NA	NCI_Signaling_events_regulated_by_Ret_tyrosine_kinase_Pathway_(lamellipodium_assembly)	NA	NA	NA	NA	NA	NA	NA	NA	NA	NA	NA	NA	NA
NA	NCI_Signaling_events_regulated_by_Ret_tyrosine_kinase_Pathway_(MAPKKK_cascade)	NA	NA	NA	NA	NA	NA	NA	NA	NA	NA	NA	NA	NA
NA	NCI_Signaling_events_regulated_by_Ret_tyrosine_kinase_Pathway_(tube_development)	NA	NA	NA	NA	NA	NA	NA	NA	NA	NA	NA	NA	NA
NA	NCI_Signaling_mediated_by_p38_alpha_and_p38_beta_Main_Pathway	NA	NA	NA	NA	NA	NA	NA	NA	NA	NA	NA	NA	NA
NA	NCI_Stabilization_and_expansion_of_the_E_cadherin_adherens_junction_Pathway_(actin_cytoskeleton_organization)	NA	NA	NA	NA	NA	NA	NA	NA	NA	NA	NA	NA	NA
NA	NCI_Stabilization_and_expansion_of_the_E_cadherin_adherens_junction_Pathway_(cortical_microtubule_organization)	NA	NA	NA	NA	NA	NA	NA	NA	NA	NA	NA	NA	NA
NA	NCI_Stabilization_and_expansion_of_the_E_cadherin_adherens_junction_Pathway_(epithelial_cell_differentiation)	NA	NA	NA	NA	NA	NA	NA	NA	NA	NA	NA	NA	NA
NA	NCI_Stabilization_and_expansion_of_the_E_cadherin_adherens_junction_Pathway_(regulation_of_calcium_dependent_cell_cell_adhesion)	NA	NA	NA	NA	NA	NA	NA	NA	NA	NA	NA	NA	NA
NA	NCI_Stabilization_and_expansion_of_the_E_cadherin_adherens_junction_Pathway_(Wnt_receptor_signaling_pathway)	NA	NA	NA	NA	NA	NA	NA	NA	NA	NA	NA	NA	NA
NA	NCI_Syndecan_1_mediated_signaling_events_Main_Pathway	NA	NA	NA	NA	NA	NA	NA	NA	NA	NA	NA	NA	NA
NA	NCI_Syndecan_1_mediated_signaling_events_Pathway_(homophilic_cell_adhesion)	NA	NA	NA	NA	NA	NA	NA	NA	NA	NA	NA	NA	NA
NA	NCI_Syndecan_1_mediated_signaling_events_Pathway_(positive_regulation_of_cell_migration)	NA	NA	NA	NA	NA	NA	NA	NA	NA	NA	NA	NA	NA
NA	NCI_Syndecan_1_mediated_signaling_events_Pathway_(Tumor_Cell_Invasion)	NA	NA	NA	NA	NA	NA	NA	NA	NA	NA	NA	NA	NA
NA	NCI_Syndecan_2_mediated_signaling_events_Pathway_(dendrite_morphogenesis)	NA	NA	NA	NA	NA	NA	NA	NA	NA	NA	NA	NA	NA
NA	NCI_Syndecan_2_mediated_signaling_events_Pathway_(determination_of_left_right_symmetry)	NA	NA	NA	NA	NA	NA	NA	NA	NA	NA	NA	NA	NA
NA	NCI_Syndecan_3_mediated_signaling_events_Pathway_(limb_bud_formation)	NA	NA	NA	NA	NA	NA	NA	NA	NA	NA	NA	NA	NA
NA	NCI_TGF_beta_receptor_signaling_Main_Pathway	NA	NA	NA	NA	NA	NA	NA	NA	NA	NA	NA	NA	NA
NA	NCI_Thromboxane_A2_receptor_signaling_Pathway_(chemotaxis)	NA	NA	NA	NA	NA	NA	NA	NA	NA	NA	NA	NA	NA
NA	NCI_Thromboxane_A2_receptor_signaling_Pathway_(MAPKKK_cascade)	NA	NA	NA	NA	NA	NA	NA	NA	NA	NA	NA	NA	NA
NA	NCI_Thromboxane_A2_receptor_signaling_Pathway_(muscle_contraction)	NA	NA	NA	NA	NA	NA	NA	NA	NA	NA	NA	NA	NA
NA	NCI_Trk_receptor_signaling_mediated_by_the_MAPK_Pathway_(neuron_projection_morphogenesis)	NA	NA	NA	NA	NA	NA	NA	NA	NA	NA	NA	NA	NA
NA	NCI_Urokinase_type_plasminogen_activator_uPA_and_uPAR_mediated_signaling_Main_Pathway	NA	NA	NA	NA	NA	NA	NA	NA	NA	NA	NA	NA	NA
NA	NCI_Urokinase_type_plasminogen_activator_uPA_and_uPAR_mediated_signaling_Pathway_(cell_proliferation)	NA	NA	NA	NA	NA	NA	NA	NA	NA	NA	NA	NA	NA
NA	NCI_Validated_transcriptional_targets_of_TAp63_isoforms_Pathway_(Metastasis)	NA	NA	NA	NA	NA	NA	NA	NA	NA	NA	NA	NA	NA
NA	NCI_Validated_transcriptional_targets_of_TAp63_isoforms_Pathway_(Pathway_degradation_of_TP63)	NA	NA	NA	NA	NA	NA	NA	NA	NA	NA	NA	NA	NA
NA	NCI_VEGF_and_VEGFR_signaling_network_Main_Pathway	NA	NA	NA	NA	NA	NA	NA	NA	NA	NA	NA	NA	NA
NA	NCI_VEGFR1_specific_signals_Main_Pathway	NA	NA	NA	NA	NA	NA	NA	NA	NA	NA	NA	NA	NA
NA	NCI_VEGFR3_signaling_in_lymphatic_endothelium_Main_Pathway	NA	NA	NA	NA	NA	NA	NA	NA	NA	NA	NA	NA	NA
NA	NCI_VEGFR3_signaling_in_lymphatic_endothelium_Pathway_(cell_proliferation)	NA	NA	NA	NA	NA	NA	NA	NA	NA	NA	NA	NA	NA
NA	NGF_Pathway_Gene_Expression_via_MYC_ELK1_CREB3_NFKB2	NA	NA	NA	NA	NA	NA	NA	NA	NA	NA	NA	NA	NA
NA	Notch_Signaling_Pathway	NA	NA	NA	NA	NA	NA	NA	NA	NA	NA	NA	NA	NA
NA	Notch_Signaling_Pathway_gamma_Secretase	NA	NA	NA	NA	NA	NA	NA	NA	NA	NA	NA	NA	NA
NA	Notch_Signaling_Pathway_Gene_Expression_Chromatin_Remodeling_via_RBPJ	NA	NA	NA	NA	NA	NA	NA	NA	NA	NA	NA	NA	NA
NA	Notch_Signaling_Pathway_Transcription_of_Target_Genes_Hairy_E-SpI_via_RBPJ	NA	NA	NA	NA	NA	NA	NA	NA	NA	NA	NA	NA	NA
NA	p38_Signaling_Pathway	NA	NA	NA	NA	NA	NA	NA	NA	NA	NA	NA	NA	NA
NA	PAK_Pathway	NA	NA	NA	NA	NA	NA	NA	NA	NA	NA	NA	NA	NA
NA	PAK_Pathway_Actin_Organization	NA	NA	NA	NA	NA	NA	NA	NA	NA	NA	NA	NA	NA
NA	PAK_Pathway_Cell_Survival	NA	NA	NA	NA	NA	NA	NA	NA	NA	NA	NA	NA	NA
NA	PAK_Pathway_Lamelliopodia_and_Filopodia_Outgrowth	NA	NA	NA	NA	NA	NA	NA	NA	NA	NA	NA	NA	NA
NA	PTEN_Pathway	NA	NA	NA	NA	NA	NA	NA	NA	NA	NA	NA	NA	NA
NA	PTEN_Pathway_Adhesion_or_Migration	NA	NA	NA	NA	NA	NA	NA	NA	NA	NA	NA	NA	NA
NA	PTEN_Pathway_Proliferation_CyclinA2_Geminin_AuroraA_PLK1	NA	NA	NA	NA	NA	NA	NA	NA	NA	NA	NA	NA	NA
NA	PTEN_Pathway_Senescence_Ets2_p16	NA	NA	NA	NA	NA	NA	NA	NA	NA	NA	NA	NA	NA
NA	Ras_Pathway	NA	NA	NA	NA	NA	NA	NA	NA	NA	NA	NA	NA	NA
NA	Ras_Pathway_Cell-Cell_Junctions	NA	NA	NA	NA	NA	NA	NA	NA	NA	NA	NA	NA	NA
NA	Ras_Pathway_Golgi_Trafficking_and_Vesicle_Formation	NA	NA	NA	NA	NA	NA	NA	NA	NA	NA	NA	NA	NA
NA	Ras_Pathway_Increased_T-cell_Adhesion	NA	NA	NA	NA	NA	NA	NA	NA	NA	NA	NA	NA	NA
NA	reactome_A_third_proteolytic_cleavage_releases_NICD_Main_Pathway	NA	NA	NA	NA	NA	NA	NA	NA	NA	NA	NA	NA	NA
NA	reactome_Abacavir_metabolism_Main_Pathway	NA	NA	NA	NA	NA	NA	NA	NA	NA	NA	NA	NA	NA
NA	reactome_Abacavir_transmembrane_transport_Main_Pathway	NA	NA	NA	NA	NA	NA	NA	NA	NA	NA	NA	NA	NA
NA	reactome_ABCA_transporters_in_lipid_homeostasis_Main_Pathway	NA	NA	NA	NA	NA	NA	NA	NA	NA	NA	NA	NA	NA
NA	reactome_Acetylcholine_Neurotransmitter_Release_Cycle_Main_Pathway	NA	NA	NA	NA	NA	NA	NA	NA	NA	NA	NA	NA	NA
NA	reactome_Activation_of_BAD_and_translocation_to_mitochondria_Main_Pathway	NA	NA	NA	NA	NA	NA	NA	NA	NA	NA	NA	NA	NA
NA	reactome_Activation_of_C3_and_C5_Main_Pathway	NA	NA	NA	NA	NA	NA	NA	NA	NA	NA	NA	NA	NA
NA	reactome_Activation_of_Matrix_Metalloproteinases_Main_Pathway	NA	NA	NA	NA	NA	NA	NA	NA	NA	NA	NA	NA	NA
NA	reactome_Activation_of_RAS_in_B_cells_Main_Pathway	NA	NA	NA	NA	NA	NA	NA	NA	NA	NA	NA	NA	NA
NA	reactome_Acyl_chain_remodeling_of_DAG_and_TAG_Main_Pathway	NA	NA	NA	NA	NA	NA	NA	NA	NA	NA	NA	NA	NA
NA	reactome_Acyl_chain_remodelling_of_PC_Main_Pathway	NA	NA	NA	NA	NA	NA	NA	NA	NA	NA	NA	NA	NA
NA	reactome_Acyl_chain_remodelling_of_PI_Main_Pathway	NA	NA	NA	NA	NA	NA	NA	NA	NA	NA	NA	NA	NA
NA	reactome_Adherens_junctions_interactions_Main_Pathway	NA	NA	NA	NA	NA	NA	NA	NA	NA	NA	NA	NA	NA
NA	reactome_Adrenaline_signalling_through_Alpha_2_adrenergic_receptor_Main_Pathway	NA	NA	NA	NA	NA	NA	NA	NA	NA	NA	NA	NA	NA
NA	reactome_Adrenoceptors_Main_Pathway	NA	NA	NA	NA	NA	NA	NA	NA	NA	NA	NA	NA	NA
NA	reactome_Alternative_complement_activation_Main_Pathway	NA	NA	NA	NA	NA	NA	NA	NA	NA	NA	NA	NA	NA
NA	reactome_Amine_compound_SLC_transporters_Main_Pathway	NA	NA	NA	NA	NA	NA	NA	NA	NA	NA	NA	NA	NA
NA	reactome_Amino_acid_and_oligopeptide_SLC_transporters_Main_Pathway	NA	NA	NA	NA	NA	NA	NA	NA	NA	NA	NA	NA	NA
NA	reactome_Amino_acid_transport_across_the_plasma_membrane_Main_Pathway	NA	NA	NA	NA	NA	NA	NA	NA	NA	NA	NA	NA	NA
NA	reactome_Anchoring_fibril_formation_Main_Pathway	NA	NA	NA	NA	NA	NA	NA	NA	NA	NA	NA	NA	NA
NA	reactome_Androgen_biosynthesis_Main_Pathway	NA	NA	NA	NA	NA	NA	NA	NA	NA	NA	NA	NA	NA
NA	reactome_Antigen_Presentation_Folding_assembly_and_peptide_loading_of_class_I_MHC_Main_Pathway	NA	NA	NA	NA	NA	NA	NA	NA	NA	NA	NA	NA	NA
NA	reactome_Apoptotic_cleavage_of_cell_adhesion_proteins_Main_Pathway	NA	NA	NA	NA	NA	NA	NA	NA	NA	NA	NA	NA	NA
NA	reactome_Arachidonate_production_from_DAG_Main_Pathway	NA	NA	NA	NA	NA	NA	NA	NA	NA	NA	NA	NA	NA
NA	reactome_Asymmetric_localization_of_PCP_proteins_Main_Pathway	NA	NA	NA	NA	NA	NA	NA	NA	NA	NA	NA	NA	NA
NA	reactome_Beta_oxidation_of_very_long_chain_fatty_acids_Main_Pathway	NA	NA	NA	NA	NA	NA	NA	NA	NA	NA	NA	NA	NA
NA	reactome_Bile_salt_and_organic_anion_SLC_transporters_Main_Pathway	NA	NA	NA	NA	NA	NA	NA	NA	NA	NA	NA	NA	NA
NA	reactome_Binding_and_entry_of_HIV_virion_Main_Pathway	NA	NA	NA	NA	NA	NA	NA	NA	NA	NA	NA	NA	NA
NA	reactome_Ca_activated_K_channels_Main_Pathway	NA	NA	NA	NA	NA	NA	NA	NA	NA	NA	NA	NA	NA
NA	reactome_Caspase_mediated_cleavage_of_cytoskeletal_proteins_Main_Pathway	NA	NA	NA	NA	NA	NA	NA	NA	NA	NA	NA	NA	NA
NA	reactome_cGMP_effects_Main_Pathway	NA	NA	NA	NA	NA	NA	NA	NA	NA	NA	NA	NA	NA
NA	reactome_Chondroitin_sulfate_biosynthesis_Main_Pathway	NA	NA	NA	NA	NA	NA	NA	NA	NA	NA	NA	NA	NA
NA	reactome_Circadian_Clock_Main_Pathway	NA	NA	NA	NA	NA	NA	NA	NA	NA	NA	NA	NA	NA
NA	reactome_Class_II_GLUTs_Main_Pathway	NA	NA	NA	NA	NA	NA	NA	NA	NA	NA	NA	NA	NA
NA	reactome_Classical_Kir_channels_Main_Pathway	NA	NA	NA	NA	NA	NA	NA	NA	NA	NA	NA	NA	NA
NA	reactome_Clathrin_derived_vesicle_budding_Main_Pathway	NA	NA	NA	NA	NA	NA	NA	NA	NA	NA	NA	NA	NA
NA	reactome_Collagen_biosynthesis_and_modifying_enzymes_Main_Pathway	NA	NA	NA	NA	NA	NA	NA	NA	NA	NA	NA	NA	NA
NA	reactome_Collagen_degradation_Main_Pathway	NA	NA	NA	NA	NA	NA	NA	NA	NA	NA	NA	NA	NA
NA	reactome_Constitutive_Signaling_by_NOTCH1_t_7_9_NOTCH1_M1580_K2555_Translocation_Mutant_Main_Pathway	NA	NA	NA	NA	NA	NA	NA	NA	NA	NA	NA	NA	NA
NA	reactome_Cross_presentation_of_particulate_exogenous_antigens_phagosomes__Main_Pathway	NA	NA	NA	NA	NA	NA	NA	NA	NA	NA	NA	NA	NA
NA	reactome_Crosslinking_of_collagen_fibrils_Main_Pathway	NA	NA	NA	NA	NA	NA	NA	NA	NA	NA	NA	NA	NA
NA	reactome_CS_DS_degradation_Main_Pathway	NA	NA	NA	NA	NA	NA	NA	NA	NA	NA	NA	NA	NA
NA	reactome_CTLA4_inhibitory_signaling_Main_Pathway	NA	NA	NA	NA	NA	NA	NA	NA	NA	NA	NA	NA	NA
NA	reactome_Cyclin_D_associated_events_in_G1_Main_Pathway	NA	NA	NA	NA	NA	NA	NA	NA	NA	NA	NA	NA	NA
NA	reactome_CYP2E1_reactions_Main_Pathway	NA	NA	NA	NA	NA	NA	NA	NA	NA	NA	NA	NA	NA
NA	reactome_DAG_and_IP3_signaling_Main_Pathway	NA	NA	NA	NA	NA	NA	NA	NA	NA	NA	NA	NA	NA
NA	reactome_Degradation_of_the_extracellular_matrix_Main_Pathway	NA	NA	NA	NA	NA	NA	NA	NA	NA	NA	NA	NA	NA
NA	reactome_Digestion_of_dietary_lipid_Main_Pathway	NA	NA	NA	NA	NA	NA	NA	NA	NA	NA	NA	NA	NA
NA	reactome_Dissolution_of_Fibrin_Clot_Main_Pathway	NA	NA	NA	NA	NA	NA	NA	NA	NA	NA	NA	NA	NA
NA	reactome_Dopamine_Neurotransmitter_Release_Cycle_Main_Pathway	NA	NA	NA	NA	NA	NA	NA	NA	NA	NA	NA	NA	NA
NA	reactome_Dopamine_receptors_Main_Pathway	NA	NA	NA	NA	NA	NA	NA	NA	NA	NA	NA	NA	NA
NA	reactome_Downregulation_of_TGF_beta_receptor_signaling_Main_Pathway	NA	NA	NA	NA	NA	NA	NA	NA	NA	NA	NA	NA	NA
NA	reactome_ECM_proteoglycans_Main_Pathway	NA	NA	NA	NA	NA	NA	NA	NA	NA	NA	NA	NA	NA
NA	reactome_Effects_of_PIP2_hydrolysis_Main_Pathway	NA	NA	NA	NA	NA	NA	NA	NA	NA	NA	NA	NA	NA
NA	reactome_EGFR_interacts_with_phospholipase_C_gamma_Main_Pathway	NA	NA	NA	NA	NA	NA	NA	NA	NA	NA	NA	NA	NA
NA	reactome_EGFR_Transactivation_by_Gastrin_Main_Pathway	NA	NA	NA	NA	NA	NA	NA	NA	NA	NA	NA	NA	NA
NA	reactome_Elastic_fibre_formation_Main_Pathway	NA	NA	NA	NA	NA	NA	NA	NA	NA	NA	NA	NA	NA
NA	reactome_Elevation_of_cytosolic_Ca2_levels_Main_Pathway	NA	NA	NA	NA	NA	NA	NA	NA	NA	NA	NA	NA	NA
NA	reactome_Endosomal_Vacuolar_Main_Pathway	NA	NA	NA	NA	NA	NA	NA	NA	NA	NA	NA	NA	NA
NA	reactome_EPH_ephrin_mediated_repulsion_of_cells_Main_Pathway	NA	NA	NA	NA	NA	NA	NA	NA	NA	NA	NA	NA	NA
NA	reactome_ER_Quality_Control_Compartment_ERQC__Main_Pathway	NA	NA	NA	NA	NA	NA	NA	NA	NA	NA	NA	NA	NA
NA	reactome_ERKs_are_inactivated_Main_Pathway	NA	NA	NA	NA	NA	NA	NA	NA	NA	NA	NA	NA	NA
NA	reactome_Facilitative_Na_independent_glucose_transporters_Main_Pathway	NA	NA	NA	NA	NA	NA	NA	NA	NA	NA	NA	NA	NA
NA	reactome_FasL_CD95L_signaling_Main_Pathway	NA	NA	NA	NA	NA	NA	NA	NA	NA	NA	NA	NA	NA
NA	reactome_FCGR_activation_Main_Pathway	NA	NA	NA	NA	NA	NA	NA	NA	NA	NA	NA	NA	NA
NA	reactome_Fibronectin_matrix_formation_Main_Pathway	NA	NA	NA	NA	NA	NA	NA	NA	NA	NA	NA	NA	NA
NA	reactome_Formation_of_annular_gap_junctions_Main_Pathway	NA	NA	NA	NA	NA	NA	NA	NA	NA	NA	NA	NA	NA
NA	reactome_Formyl_peptide_receptors_bind_formyl_peptides_and_many_other_ligands_Main_Pathway	NA	NA	NA	NA	NA	NA	NA	NA	NA	NA	NA	NA	NA
NA	reactome_GAB1_signalosome_Main_Pathway	NA	NA	NA	NA	NA	NA	NA	NA	NA	NA	NA	NA	NA
NA	reactome_GABA_synthesis_release_reuptake_and_degradation_Main_Pathway	NA	NA	NA	NA	NA	NA	NA	NA	NA	NA	NA	NA	NA
NA	reactome_Gap_junction_assembly_Main_Pathway	NA	NA	NA	NA	NA	NA	NA	NA	NA	NA	NA	NA	NA
NA	reactome_Gap_junction_degradation_Main_Pathway	NA	NA	NA	NA	NA	NA	NA	NA	NA	NA	NA	NA	NA
NA	reactome_Glutamate_Neurotransmitter_Release_Cycle_Main_Pathway	NA	NA	NA	NA	NA	NA	NA	NA	NA	NA	NA	NA	NA
NA	reactome_Glycogen_breakdown_glycogenolysis__Main_Pathway	NA	NA	NA	NA	NA	NA	NA	NA	NA	NA	NA	NA	NA
NA	reactome_Glycogen_synthesis_Main_Pathway	NA	NA	NA	NA	NA	NA	NA	NA	NA	NA	NA	NA	NA
NA	reactome_Glycosphingolipid_metabolism_Main_Pathway	NA	NA	NA	NA	NA	NA	NA	NA	NA	NA	NA	NA	NA
NA	reactome_Growth_hormone_receptor_signaling_Main_Pathway	NA	NA	NA	NA	NA	NA	NA	NA	NA	NA	NA	NA	NA
NA	reactome_Histamine_receptors_Main_Pathway	NA	NA	NA	NA	NA	NA	NA	NA	NA	NA	NA	NA	NA
NA	reactome_Hypusinylation_Main_Pathway	NA	NA	NA	NA	NA	NA	NA	NA	NA	NA	NA	NA	NA
NA	reactome_Initial_triggering_of_complement_Main_Pathway	NA	NA	NA	NA	NA	NA	NA	NA	NA	NA	NA	NA	NA
NA	reactome_Inositol_transporters_Main_Pathway	NA	NA	NA	NA	NA	NA	NA	NA	NA	NA	NA	NA	NA
NA	reactome_Insulin_receptor_recycling_Main_Pathway	NA	NA	NA	NA	NA	NA	NA	NA	NA	NA	NA	NA	NA
NA	reactome_Interaction_With_The_Zona_Pellucida_Main_Pathway	NA	NA	NA	NA	NA	NA	NA	NA	NA	NA	NA	NA	NA
NA	reactome_Interconversion_of_2_oxoglutarate_and_2_hydroxyglutarate_Main_Pathway	NA	NA	NA	NA	NA	NA	NA	NA	NA	NA	NA	NA	NA
NA	reactome_Interconversion_of_polyamines_Main_Pathway	NA	NA	NA	NA	NA	NA	NA	NA	NA	NA	NA	NA	NA
NA	reactome_Interferon_gamma_signaling_Main_Pathway	NA	NA	NA	NA	NA	NA	NA	NA	NA	NA	NA	NA	NA
NA	reactome_Interleukin_6_signaling_Main_Pathway	NA	NA	NA	NA	NA	NA	NA	NA	NA	NA	NA	NA	NA
NA	reactome_Intrinsic_Pathway_Main_Pathway	NA	NA	NA	NA	NA	NA	NA	NA	NA	NA	NA	NA	NA
NA	reactome_Ion_transport_by_P_type_ATPases_Main_Pathway	NA	NA	NA	NA	NA	NA	NA	NA	NA	NA	NA	NA	NA
NA	reactome_IRS_activation_Main_Pathway	NA	NA	NA	NA	NA	NA	NA	NA	NA	NA	NA	NA	NA
NA	reactome_IRS_related_events_triggered_by_IGF1R_Main_Pathway	NA	NA	NA	NA	NA	NA	NA	NA	NA	NA	NA	NA	NA
NA	reactome_ISG15_antiviral_mechanism_Main_Pathway	NA	NA	NA	NA	NA	NA	NA	NA	NA	NA	NA	NA	NA
NA	reactome_Keratan_sulfate_degradation_Main_Pathway	NA	NA	NA	NA	NA	NA	NA	NA	NA	NA	NA	NA	NA
NA	reactome_L1CAM_interactions_Main_Pathway	NA	NA	NA	NA	NA	NA	NA	NA	NA	NA	NA	NA	NA
NA	reactome_Laminin_interactions_Main_Pathway	NA	NA	NA	NA	NA	NA	NA	NA	NA	NA	NA	NA	NA
NA	reactome_Lysosphingolipid_and_LPA_receptors_Main_Pathway	NA	NA	NA	NA	NA	NA	NA	NA	NA	NA	NA	NA	NA
NA	reactome_Metabolism_of_Angiotensinogen_to_Angiotensins_Main_Pathway	NA	NA	NA	NA	NA	NA	NA	NA	NA	NA	NA	NA	NA
NA	reactome_Metal_ion_SLC_transporters_Main_Pathway	NA	NA	NA	NA	NA	NA	NA	NA	NA	NA	NA	NA	NA
NA	reactome_Miscellaneous_substrates_Main_Pathway	NA	NA	NA	NA	NA	NA	NA	NA	NA	NA	NA	NA	NA
NA	reactome_misspliced_LRP5_mutants_have_enhanced_beta_catenin_dependent_signaling_Main_Pathway	NA	NA	NA	NA	NA	NA	NA	NA	NA	NA	NA	NA	NA
NA	reactome_Molecules_associated_with_elastic_fibres_Main_Pathway	NA	NA	NA	NA	NA	NA	NA	NA	NA	NA	NA	NA	NA
NA	reactome_Multifunctional_anion_exchangers_Main_Pathway	NA	NA	NA	NA	NA	NA	NA	NA	NA	NA	NA	NA	NA
NA	reactome_MyD88_cascade_initiated_on_plasma_membrane_Main_Pathway	NA	NA	NA	NA	NA	NA	NA	NA	NA	NA	NA	NA	NA
NA	reactome_MyD88_independent_cascade_Main_Pathway	NA	NA	NA	NA	NA	NA	NA	NA	NA	NA	NA	NA	NA
NA	reactome_N_Glycan_antennae_elongation_Main_Pathway	NA	NA	NA	NA	NA	NA	NA	NA	NA	NA	NA	NA	NA
NA	reactome_N_glycan_trimming_in_the_ER_and_Calnexin_Calreticulin_cycle_Main_Pathway	NA	NA	NA	NA	NA	NA	NA	NA	NA	NA	NA	NA	NA
NA	reactome_Nectin_Necl_trans_heterodimerization_Main_Pathway	NA	NA	NA	NA	NA	NA	NA	NA	NA	NA	NA	NA	NA
NA	reactome_Neurofascin_interactions_Main_Pathway	NA	NA	NA	NA	NA	NA	NA	NA	NA	NA	NA	NA	NA
NA	reactome_NGF_processing_Main_Pathway	NA	NA	NA	NA	NA	NA	NA	NA	NA	NA	NA	NA	NA
NA	reactome_Nicotinate_metabolism_Main_Pathway	NA	NA	NA	NA	NA	NA	NA	NA	NA	NA	NA	NA	NA
NA	reactome_Non_integrin_membrane_ECM_interactions_Main_Pathway	NA	NA	NA	NA	NA	NA	NA	NA	NA	NA	NA	NA	NA
NA	reactome_Norepinephrine_Neurotransmitter_Release_Cycle_Main_Pathway	NA	NA	NA	NA	NA	NA	NA	NA	NA	NA	NA	NA	NA
NA	reactome_NOTCH2_Activation_and_Transmission_of_Signal_to_the_Nucleus_Main_Pathway	NA	NA	NA	NA	NA	NA	NA	NA	NA	NA	NA	NA	NA
NA	reactome_NrCAM_interactions_Main_Pathway	NA	NA	NA	NA	NA	NA	NA	NA	NA	NA	NA	NA	NA
NA	reactome_O_glycosylation_of_TSR_domain_containing_proteins_Main_Pathway	NA	NA	NA	NA	NA	NA	NA	NA	NA	NA	NA	NA	NA
NA	reactome_Oncogene_Induced_Senescence_Main_Pathway	NA	NA	NA	NA	NA	NA	NA	NA	NA	NA	NA	NA	NA
NA	reactome_Organic_anion_transporters_Main_Pathway	NA	NA	NA	NA	NA	NA	NA	NA	NA	NA	NA	NA	NA
NA	reactome_Organic_cation_transport_Main_Pathway	NA	NA	NA	NA	NA	NA	NA	NA	NA	NA	NA	NA	NA
NA	reactome_Oxidative_Stress_Induced_Senescence_Main_Pathway	NA	NA	NA	NA	NA	NA	NA	NA	NA	NA	NA	NA	NA
NA	reactome_Oxygen_dependent_asparagine_hydroxylation_of_Hypoxia_inducible_Factor_Alpha_Main_Pathway	NA	NA	NA	NA	NA	NA	NA	NA	NA	NA	NA	NA	NA
NA	reactome_PECAM1_interactions_Main_Pathway	NA	NA	NA	NA	NA	NA	NA	NA	NA	NA	NA	NA	NA
NA	reactome_Phagosomal_maturation_early_endosomal_stage__Main_Pathway	NA	NA	NA	NA	NA	NA	NA	NA	NA	NA	NA	NA	NA
NA	reactome_PI3K_AKT_activation_Main_Pathway	NA	NA	NA	NA	NA	NA	NA	NA	NA	NA	NA	NA	NA
NA	reactome_PI3K_Cascade_Main_Pathway	NA	NA	NA	NA	NA	NA	NA	NA	NA	NA	NA	NA	NA
NA	reactome_Plasmalogen_biosynthesis_Main_Pathway	NA	NA	NA	NA	NA	NA	NA	NA	NA	NA	NA	NA	NA
NA	reactome_PLC_beta_mediated_events_Main_Pathway	NA	NA	NA	NA	NA	NA	NA	NA	NA	NA	NA	NA	NA
NA	reactome_Pre_NOTCH_Processing_in_Golgi_Main_Pathway	NA	NA	NA	NA	NA	NA	NA	NA	NA	NA	NA	NA	NA
NA	reactome_Pre_NOTCH_Processing_in_the_Endoplasmic_Reticulum_Main_Pathway	NA	NA	NA	NA	NA	NA	NA	NA	NA	NA	NA	NA	NA
NA	reactome_Pregnenolone_biosynthesis_Main_Pathway	NA	NA	NA	NA	NA	NA	NA	NA	NA	NA	NA	NA	NA
NA	reactome_Prolactin_receptor_signaling_Main_Pathway	NA	NA	NA	NA	NA	NA	NA	NA	NA	NA	NA	NA	NA
NA	reactome_Pyruvate_metabolism_Main_Pathway	NA	NA	NA	NA	NA	NA	NA	NA	NA	NA	NA	NA	NA
NA	reactome_Receptor_ligand_binding_initiates_the_second_proteolytic_cleavage_of_Notch_receptor_Main_Pathway	NA	NA	NA	NA	NA	NA	NA	NA	NA	NA	NA	NA	NA
NA	reactome_Recycling_pathway_of_L1_Main_Pathway	NA	NA	NA	NA	NA	NA	NA	NA	NA	NA	NA	NA	NA
NA	reactome_Regulated_proteolysis_of_p75NTR_Main_Pathway	NA	NA	NA	NA	NA	NA	NA	NA	NA	NA	NA	NA	NA
NA	reactome_Regulation_by_c_FLIP_Main_Pathway	NA	NA	NA	NA	NA	NA	NA	NA	NA	NA	NA	NA	NA
NA	reactome_Regulation_of_Complement_cascade_Main_Pathway	NA	NA	NA	NA	NA	NA	NA	NA	NA	NA	NA	NA	NA
NA	reactome_Regulation_of_gene_expression_in_endocrine_committed_NEUROG3_progenitor_cells_Main_Pathway	NA	NA	NA	NA	NA	NA	NA	NA	NA	NA	NA	NA	NA
NA	reactome_Regulation_of_gene_expression_in_late_stage_branching_morphogenesis_pancreatic_bud_precursor_cells_Main_Pathway	NA	NA	NA	NA	NA	NA	NA	NA	NA	NA	NA	NA	NA
NA	reactome_Regulation_of_IFNG_signaling_Main_Pathway	NA	NA	NA	NA	NA	NA	NA	NA	NA	NA	NA	NA	NA
NA	reactome_Regulation_of_IGF_Activity_by_IGFBP_Main_Pathway	NA	NA	NA	NA	NA	NA	NA	NA	NA	NA	NA	NA	NA
NA	reactome_Regulation_of_KIT_signaling_Main_Pathway	NA	NA	NA	NA	NA	NA	NA	NA	NA	NA	NA	NA	NA
NA	reactome_Rhesus_glycoproteins_mediate_ammonium_transport__Main_Pathway	NA	NA	NA	NA	NA	NA	NA	NA	NA	NA	NA	NA	NA
NA	reactome_RIG_I_MDA5_mediated_induction_of_IFN_alpha_beta_pathways_Main_Pathway	NA	NA	NA	NA	NA	NA	NA	NA	NA	NA	NA	NA	NA
NA	reactome_RNA_Polymerase_I_Promoter_Opening_Main_Pathway	NA	NA	NA	NA	NA	NA	NA	NA	NA	NA	NA	NA	NA
NA	reactome_RNF_mutants_show_enhanced_WNT_signaling_and_proliferation_Main_Pathway	NA	NA	NA	NA	NA	NA	NA	NA	NA	NA	NA	NA	NA
NA	reactome_Role_of_LAT2_NTAL_LAB_on_calcium_mobilization_Main_Pathway	NA	NA	NA	NA	NA	NA	NA	NA	NA	NA	NA	NA	NA
NA	reactome_Role_of_phospholipids_in_phagocytosis_Main_Pathway	NA	NA	NA	NA	NA	NA	NA	NA	NA	NA	NA	NA	NA
NA	reactome_Serotonin_Neurotransmitter_Release_Cycle_Main_Pathway	NA	NA	NA	NA	NA	NA	NA	NA	NA	NA	NA	NA	NA
NA	reactome_Serotonin_receptors_Main_Pathway	NA	NA	NA	NA	NA	NA	NA	NA	NA	NA	NA	NA	NA
NA	reactome_SHC_related_events_triggered_by_IGF1R_Main_Pathway	NA	NA	NA	NA	NA	NA	NA	NA	NA	NA	NA	NA	NA
NA	reactome_SHC1_events_in_ERBB2_signaling_Main_Pathway	NA	NA	NA	NA	NA	NA	NA	NA	NA	NA	NA	NA	NA
NA	reactome_SHC1_events_in_ERBB4_signaling_Main_Pathway	NA	NA	NA	NA	NA	NA	NA	NA	NA	NA	NA	NA	NA
NA	reactome_Sialic_acid_metabolism_Main_Pathway	NA	NA	NA	NA	NA	NA	NA	NA	NA	NA	NA	NA	NA
NA	reactome_Signal_attenuation_Main_Pathway	NA	NA	NA	NA	NA	NA	NA	NA	NA	NA	NA	NA	NA
NA	reactome_Signal_transduction_by_L1_Main_Pathway	NA	NA	NA	NA	NA	NA	NA	NA	NA	NA	NA	NA	NA
NA	reactome_Signaling_by_Activin_Main_Pathway	NA	NA	NA	NA	NA	NA	NA	NA	NA	NA	NA	NA	NA
NA	reactome_Signaling_by_EGFR_Main_Pathway	NA	NA	NA	NA	NA	NA	NA	NA	NA	NA	NA	NA	NA
NA	reactome_Signaling_by_ERBB2_Main_Pathway	NA	NA	NA	NA	NA	NA	NA	NA	NA	NA	NA	NA	NA
NA	reactome_Signaling_by_ERBB4_Main_Pathway	NA	NA	NA	NA	NA	NA	NA	NA	NA	NA	NA	NA	NA
NA	reactome_Signaling_by_Leptin_Main_Pathway	NA	NA	NA	NA	NA	NA	NA	NA	NA	NA	NA	NA	NA
NA	reactome_Signaling_by_NOTCH3_Main_Pathway	NA	NA	NA	NA	NA	NA	NA	NA	NA	NA	NA	NA	NA
NA	reactome_Signaling_by_NOTCH4_Main_Pathway	NA	NA	NA	NA	NA	NA	NA	NA	NA	NA	NA	NA	NA
NA	reactome_Signaling_by_SCF_KIT_Main_Pathway	NA	NA	NA	NA	NA	NA	NA	NA	NA	NA	NA	NA	NA
NA	reactome_Signaling_by_Type_1_Insulin_like_Growth_Factor_1_Receptor_IGF1R__Main_Pathway	NA	NA	NA	NA	NA	NA	NA	NA	NA	NA	NA	NA	NA
NA	reactome_Signaling_by_Wnt_Main_Pathway	NA	NA	NA	NA	NA	NA	NA	NA	NA	NA	NA	NA	NA
NA	reactome_Signalling_to_p38_via_RIT_and_RIN_Main_Pathway	NA	NA	NA	NA	NA	NA	NA	NA	NA	NA	NA	NA	NA
NA	reactome_SMAD2_3_MH2_Domain_Mutants_in_Cancer_Main_Pathway	NA	NA	NA	NA	NA	NA	NA	NA	NA	NA	NA	NA	NA
NA	reactome_SMAD2_3_Phosphorylation_Motif_Mutants_in_Cancer_Main_Pathway	NA	NA	NA	NA	NA	NA	NA	NA	NA	NA	NA	NA	NA
NA	reactome_Smooth_Muscle_Contraction_Main_Pathway	NA	NA	NA	NA	NA	NA	NA	NA	NA	NA	NA	NA	NA
NA	reactome_SOS_mediated_signalling_Main_Pathway	NA	NA	NA	NA	NA	NA	NA	NA	NA	NA	NA	NA	NA
NA	reactome_Sperm_Oocyte_Membrane_Binding_Main_Pathway	NA	NA	NA	NA	NA	NA	NA	NA	NA	NA	NA	NA	NA
NA	reactome_Sphingolipid_de_novo_biosynthesis_Main_Pathway	NA	NA	NA	NA	NA	NA	NA	NA	NA	NA	NA	NA	NA
NA	reactome_Stabilization_of_p53_Main_Pathway	NA	NA	NA	NA	NA	NA	NA	NA	NA	NA	NA	NA	NA
NA	reactome_Sulfide_oxidation_to_sulfate_Main_Pathway	NA	NA	NA	NA	NA	NA	NA	NA	NA	NA	NA	NA	NA
NA	reactome_Synthesis_of_Dolichyl_phosphate_Main_Pathway	NA	NA	NA	NA	NA	NA	NA	NA	NA	NA	NA	NA	NA
NA	reactome_Synthesis_of_IP2_IP_and_Ins_in_the_cytosol_Main_Pathway	NA	NA	NA	NA	NA	NA	NA	NA	NA	NA	NA	NA	NA
NA	reactome_Synthesis_of_PC_Main_Pathway	NA	NA	NA	NA	NA	NA	NA	NA	NA	NA	NA	NA	NA
NA	reactome_Synthesis_of_Prostaglandins_PG_and_Thromboxanes_TX__Main_Pathway	NA	NA	NA	NA	NA	NA	NA	NA	NA	NA	NA	NA	NA
NA	reactome_Synthesis_of_UDP_N_acetyl_glucosamine_Main_Pathway	NA	NA	NA	NA	NA	NA	NA	NA	NA	NA	NA	NA	NA
NA	reactome_Terminal_pathway_of_complement_Main_Pathway	NA	NA	NA	NA	NA	NA	NA	NA	NA	NA	NA	NA	NA
NA	reactome_TGF_beta_receptor_signaling_activates_SMADs_Main_Pathway	NA	NA	NA	NA	NA	NA	NA	NA	NA	NA	NA	NA	NA
NA	reactome_TGFBR1_KD_Mutants_in_Cancer_Main_Pathway	NA	NA	NA	NA	NA	NA	NA	NA	NA	NA	NA	NA	NA
NA	reactome_TGFBR2_Kinase_Domain_Mutants_in_Cancer_Main_Pathway	NA	NA	NA	NA	NA	NA	NA	NA	NA	NA	NA	NA	NA
NA	reactome_The_activation_of_arylsulfatases_Main_Pathway	NA	NA	NA	NA	NA	NA	NA	NA	NA	NA	NA	NA	NA
NA	reactome_The_NLRP1_inflammasome_Main_Pathway	NA	NA	NA	NA	NA	NA	NA	NA	NA	NA	NA	NA	NA
NA	reactome_Tie2_Signaling_Main_Pathway	NA	NA	NA	NA	NA	NA	NA	NA	NA	NA	NA	NA	NA
NA	reactome_Toll_Like_Receptor_4_TLR4_Cascade_Main_Pathway	NA	NA	NA	NA	NA	NA	NA	NA	NA	NA	NA	NA	NA
NA	reactome_Toll_Like_Receptor_TLR6_TLR2_Cascade_Main_Pathway	NA	NA	NA	NA	NA	NA	NA	NA	NA	NA	NA	NA	NA
NA	reactome_Toxicity_of_botulinum_toxin_type_B_BoNT_B__Main_Pathway	NA	NA	NA	NA	NA	NA	NA	NA	NA	NA	NA	NA	NA
NA	reactome_Toxicity_of_botulinum_toxin_type_G_BoNT_G__Main_Pathway	NA	NA	NA	NA	NA	NA	NA	NA	NA	NA	NA	NA	NA
NA	reactome_Trafficking_and_processing_of_endosomal_TLR_Main_Pathway	NA	NA	NA	NA	NA	NA	NA	NA	NA	NA	NA	NA	NA
NA	reactome_Trafficking_of_AMPA_receptors_Main_Pathway	NA	NA	NA	NA	NA	NA	NA	NA	NA	NA	NA	NA	NA
NA	reactome_Trafficking_of_GluR2_containing_AMPA_receptors_Main_Pathway	NA	NA	NA	NA	NA	NA	NA	NA	NA	NA	NA	NA	NA
NA	reactome_TRAIL_signaling_Main_Pathway	NA	NA	NA	NA	NA	NA	NA	NA	NA	NA	NA	NA	NA
NA	reactome_Transferrin_endocytosis_and_recycling_Main_Pathway	NA	NA	NA	NA	NA	NA	NA	NA	NA	NA	NA	NA	NA
NA	reactome_Transport_and_synthesis_of_PAPS_Main_Pathway	NA	NA	NA	NA	NA	NA	NA	NA	NA	NA	NA	NA	NA
NA	reactome_Transport_of_glucose_and_other_sugars_bile_salts_and_organic_acids_metal_ions_and_amine_compounds_Main_Pathway	NA	NA	NA	NA	NA	NA	NA	NA	NA	NA	NA	NA	NA
NA	reactome_Transport_of_inorganic_cations_anions_and_amino_acids_oligopeptides_Main_Pathway	NA	NA	NA	NA	NA	NA	NA	NA	NA	NA	NA	NA	NA
NA	reactome_Transport_of_nucleotide_sugars_Main_Pathway	NA	NA	NA	NA	NA	NA	NA	NA	NA	NA	NA	NA	NA
NA	reactome_Transport_of_organic_anions_Main_Pathway	NA	NA	NA	NA	NA	NA	NA	NA	NA	NA	NA	NA	NA
NA	reactome_Type_I_hemidesmosome_assembly_Main_Pathway	NA	NA	NA	NA	NA	NA	NA	NA	NA	NA	NA	NA	NA
NA	reactome_VEGF_binds_to_VEGFR_leading_to_receptor_dimerization_Main_Pathway	NA	NA	NA	NA	NA	NA	NA	NA	NA	NA	NA	NA	NA
NA	reactome_Vitamin_C_ascorbate_metabolism_Main_Pathway	NA	NA	NA	NA	NA	NA	NA	NA	NA	NA	NA	NA	NA
NA	reactome_Vitamin_D_calciferol_metabolism_Main_Pathway	NA	NA	NA	NA	NA	NA	NA	NA	NA	NA	NA	NA	NA
NA	reactome_Vpr_mediated_induction_of_apoptosis_by_mitochondrial_outer_membrane_permeabilization_Main_Pathway	NA	NA	NA	NA	NA	NA	NA	NA	NA	NA	NA	NA	NA
NA	reactome_WNT_ligand_biogenesis_and_trafficking_Main_Pathway	NA	NA	NA	NA	NA	NA	NA	NA	NA	NA	NA	NA	NA
NA	reactome_Xenobiotics_Main_Pathway	NA	NA	NA	NA	NA	NA	NA	NA	NA	NA	NA	NA	NA
NA	reactome_Zinc_influx_into_cells_by_the_SLC39_gene_family_Main_Pathway	NA	NA	NA	NA	NA	NA	NA	NA	NA	NA	NA	NA	NA
NA	STAT3_Pathway	NA	NA	NA	NA	NA	NA	NA	NA	NA	NA	NA	NA	NA
NA	STAT3_Pathway_Growth_Arrest_and_Differentiation	NA	NA	NA	NA	NA	NA	NA	NA	NA	NA	NA	NA	NA
NA	TGF-Beta_Pathway	NA	NA	NA	NA	NA	NA	NA	NA	NA	NA	NA	NA	NA
NA	TGF-Beta_Pathway_Post_Transciptional_G1_Arrest	NA	NA	NA	NA	NA	NA	NA	NA	NA	NA	NA	NA	NA
NA	TRAF_Pathway_Cell_Survival	NA	NA	NA	NA	NA	NA	NA	NA	NA	NA	NA	NA	NA
NA	WNT_Pathway	NA	NA	NA	NA	NA	NA	NA	NA	NA	NA	NA	NA	NA
NA	WNT_Pathway_NFAT_Pathway	NA	NA	NA	NA	NA	NA	NA	NA	NA	NA	NA	NA	NA
NA	WNT_Pathway_PKC_Pathway	NA	NA	NA	NA	NA	NA	NA	NA	NA	NA	NA	NA	NA

## Sheet: GSE59861_12h_GSE55118
X1_sets_GSE55118_middle_vs_young	X1_sets_GSE55118_old_vs_young	X1_sets_GSE59861_12h_2Gy	X1_sets_GSE59861_12h_5cGy	X2_sets_GSE55118_middle_vs_young_GSE55118_old_vs_young	X2_sets_GSE55118_middle_vs_young_GSE59861_12h_2Gy	X2_sets_GSE55118_middle_vs_young_GSE59861_12h_5cGy	X2_sets_GSE55118_old_vs_young_GSE59861_12h_2Gy	X2_sets_GSE55118_old_vs_young_GSE59861_12h_5cGy	X2_sets_GSE59861_12h_2Gy_GSE59861_12h_5cGy	X3_sets_GSE55118_middle_vs_young_GSE55118_old_vs_young_GSE59861_12h_2Gy	X3_sets_GSE55118_middle_vs_young_GSE55118_old_vs_young_GSE59861_12h_5cGy	X3_sets_GSE55118_middle_vs_young_GSE59861_12h_2Gy_GSE59861_12h_5cGy	X3_sets_GSE55118_old_vs_young_GSE59861_12h_2Gy_GSE59861_12h_5cGy	X4_sets_GSE55118_middle_vs_young_GSE55118_old_vs_young_GSE59861_12h_2Gy_GSE59861_12h_5cGy
AHR_Pathway_PS2_Gene_expression_via_ESR1	NCI_CD40_CD40L_signaling_Pathway_(proteasomal_ubiquitin_dependent_protein_catabolic_process)	BRCA1_Pathway_G1_S_arrest	KEGG_Mineral_absorption_Main_Pathway	NCI_N_cadherin_signaling_events_Pathway_(adherens_junction_organization)	NA	NA	NA	NCI_CD40_CD40L_signaling_Pathway_(proteasomal_ubiquitin_dependent_protein_catabolic_process)	KEGG_Mineral_absorption_Main_Pathway	NA	NA	NA	NA	NA
NCI_Arf6_downstream_Pathway_(liver_development)	NCI_EPHA2_forward_signaling_Main_Pathway	KEGG_Mineral_absorption_Main_Pathway	NCI_CD40_CD40L_signaling_Pathway_(proteasomal_ubiquitin_dependent_protein_catabolic_process)	NCI_RhoA_signaling_Pathway_(Pathway_positive_regulation_of_NF_kappaB_transcription_factor_activity_via_RHOA)	NA	NA	NA	NA	NCI_Presenilin_action_in_Notch_and_Wnt_signaling_Pathway_(apoptosis)	NA	NA	NA	NA	NA
NCI_Arf6_downstream_Pathway_(myoblast_fusion)	NCI_N_cadherin_signaling_events_Pathway_(adherens_junction_organization)	NCI_Presenilin_action_in_Notch_and_Wnt_signaling_Pathway_(apoptosis)	NCI_Presenilin_action_in_Notch_and_Wnt_signaling_Pathway_(apoptosis)	NCI_Stabilization_and_expansion_of_the_E_cadherin_adherens_junction_Pathway_(adherens_junction_organization)	NA	NA	NA	NA	NCI_Signaling_events_mediated_by_VEGFR1_and_VEGFR2_Pathway_(Pathway_degradation_of_AKAP1)	NA	NA	NA	NA	NA
NCI_Arf6_downstream_Pathway_(regulation_of_epithelial_cell_migration)	NCI_PAR1_mediated_thrombin_signaling_events_Pathway_(chemotaxis)	NCI_Signaling_events_mediated_by_VEGFR1_and_VEGFR2_Pathway_(Pathway_degradation_of_AKAP1)	NCI_Signaling_events_mediated_by_VEGFR1_and_VEGFR2_Pathway_(Pathway_degradation_of_AKAP1)	NA	NA	NA	NA	NA	NA	NA	NA	NA	NA	NA
NCI_Arf6_downstream_Pathway_(substrate_adhesion_dependent_cell_spreading)	NCI_PAR1_mediated_thrombin_signaling_events_Pathway_(Regulation_of_Cell_Shape)	NCI_Trk_receptor_signaling_mediated_by_PI3K_and_PLC_gamma_Pathway_(regulation_of_long_term_neuronal_synaptic_plasticity)	NA	NA	NA	NA	NA	NA	NA	NA	NA	NA	NA	NA
NCI_Arf6_trafficking_events_Pathway_(clathrin_independent_pinocytosis)	NCI_PAR4_mediated_thrombin_signaling_events_Pathway_(platelet_aggregation)	reactome_p53_Dependent_G1_DNA_Damage_Response_Main_Pathway	NA	NA	NA	NA	NA	NA	NA	NA	NA	NA	NA	NA
NCI_Arf6_trafficking_events_Pathway_(positive_regulation_of_endocytosis)	NCI_PAR4_mediated_thrombin_signaling_events_Pathway_(Regulation_of_Cell_Shape)	NA	NA	NA	NA	NA	NA	NA	NA	NA	NA	NA	NA	NA
NCI_Arf6_trafficking_events_Pathway_(receptor_recycling)	NCI_Regulation_of_nuclear_SMAD2_3_signaling_Pathway_(negative_regulation_of_cell_growth)	NA	NA	NA	NA	NA	NA	NA	NA	NA	NA	NA	NA	NA
NCI_LPA_receptor_mediated_events_Pathway_(contractile_ring_contraction_involved_in_cytokinesis)	NCI_RhoA_signaling_Pathway_(Pathway_positive_regulation_of_NF_kappaB_transcription_factor_activity_via_RHOA)	NA	NA	NA	NA	NA	NA	NA	NA	NA	NA	NA	NA	NA
NCI_N_cadherin_signaling_events_Pathway_(adherens_junction_organization)	NCI_Stabilization_and_expansion_of_the_E_cadherin_adherens_junction_Pathway_(adherens_junction_organization)	NA	NA	NA	NA	NA	NA	NA	NA	NA	NA	NA	NA	NA
NCI_PAR1_mediated_thrombin_signaling_events_Pathway_(focal_adhesion_assembly)	NCI_Syndecan_2_mediated_signaling_events_Pathway_(positive_regulation_of_cell_cell_adhesion)	NA	NA	NA	NA	NA	NA	NA	NA	NA	NA	NA	NA	NA
NCI_PLK2_and_PLK4_events_Main_Pathway	reactome_AMPK_inhibits_chREBP_transcriptional_activation_activity_Main_Pathway	NA	NA	NA	NA	NA	NA	NA	NA	NA	NA	NA	NA	NA
NCI_PLK2_and_PLK4_events_Pathway_(regulation_of_centriole_replication)	reactome_Nonhomologous_End_joining_NHEJ__Main_Pathway	NA	NA	NA	NA	NA	NA	NA	NA	NA	NA	NA	NA	NA
NCI_RhoA_signaling_Pathway_(actin_cytoskeleton_organization)	NA	NA	NA	NA	NA	NA	NA	NA	NA	NA	NA	NA	NA	NA
NCI_RhoA_signaling_Pathway_(Golgi_organization)	NA	NA	NA	NA	NA	NA	NA	NA	NA	NA	NA	NA	NA	NA
NCI_RhoA_signaling_Pathway_(Pathway_positive_regulation_of_NF_kappaB_transcription_factor_activity_via_RHOA)	NA	NA	NA	NA	NA	NA	NA	NA	NA	NA	NA	NA	NA	NA
NCI_Stabilization_and_expansion_of_the_E_cadherin_adherens_junction_Pathway_(adherens_junction_organization)	NA	NA	NA	NA	NA	NA	NA	NA	NA	NA	NA	NA	NA	NA
NCI_Syndecan_2_mediated_signaling_events_Pathway_(dendrite_morphogenesis)	NA	NA	NA	NA	NA	NA	NA	NA	NA	NA	NA	NA	NA	NA
NCI_Syndecan_2_mediated_signaling_events_Pathway_(determination_of_left_right_symmetry)	NA	NA	NA	NA	NA	NA	NA	NA	NA	NA	NA	NA	NA	NA
reactome_Mitochondrial_transcription_initiation_Main_Pathway	NA	NA	NA	NA	NA	NA	NA	NA	NA	NA	NA	NA	NA	NA
reactome_PERK_regulates_gene_expression_Main_Pathway	NA	NA	NA	NA	NA	NA	NA	NA	NA	NA	NA	NA	NA	NA
reactome_Synthesis_of_PIPs_at_the_ER_membrane_Main_Pathway	NA	NA	NA	NA	NA	NA	NA	NA	NA	NA	NA	NA	NA	NA

## Sheet: GSE59861_24h_EMTAB2086
X1_sets_EMTAB2086_70_vs_30	X1_sets_EMTAB2086_80_vs_30	X1_sets_GSE59861_24h_2Gy	X1_sets_GSE59861_24h_5cGy	X2_sets_EMTAB2086_70_vs_30_EMTAB2086_80_vs_30	X2_sets_EMTAB2086_70_vs_30_GSE59861_24h_2Gy	X2_sets_EMTAB2086_70_vs_30_GSE59861_24h_5cGy	X2_sets_EMTAB2086_80_vs_30_GSE59861_24h_2Gy	X2_sets_EMTAB2086_80_vs_30_GSE59861_24h_5cGy	X2_sets_GSE59861_24h_2Gy_GSE59861_24h_5cGy	X3_sets_EMTAB2086_70_vs_30_EMTAB2086_80_vs_30_GSE59861_24h_2Gy	X3_sets_EMTAB2086_70_vs_30_EMTAB2086_80_vs_30_GSE59861_24h_5cGy	X3_sets_EMTAB2086_70_vs_30_GSE59861_24h_2Gy_GSE59861_24h_5cGy	X3_sets_EMTAB2086_80_vs_30_GSE59861_24h_2Gy_GSE59861_24h_5cGy	X4_sets_EMTAB2086_70_vs_30_EMTAB2086_80_vs_30_GSE59861_24h_2Gy_GSE59861_24h_5cGy
Akt_Signaling_Pathway_Increased_GLUT4_translocation	AHR_Pathway	ATM_Pathway_Cell_Cycle_Checkpoint_Control	ILK_Signaling_Pathway_Induced_Cell_Proliferation	Akt_Signaling_Pathway_Increased_GLUT4_translocation	BRCA1_Pathway_E2_Responsive_Genes	KEGG_Cell_cycle_Main_Pathway	KEGG_Cell_cycle_Main_Pathway	ILK_Signaling_Pathway_Induced_Cell_Proliferation	KEGG_Basal_cell_carcinoma_Main_Pathway	KEGG_Cell_cycle_Main_Pathway	KEGG_Cell_cycle_Main_Pathway	KEGG_Cell_cycle_Main_Pathway	KEGG_Cell_cycle_Main_Pathway	KEGG_Cell_cycle_Main_Pathway
Akt_Signaling_Pathway_Promotes_Adipogenesis	AHR_Pathway_Cath_D_expression_via_SP1	ATM_Pathway_NF-kB_Pathway	KEGG_Basal_cell_carcinoma_Main_Pathway	Akt_Signaling_Pathway_Promotes_Adipogenesis	BRCA1_Pathway_G1_S_arrest	KEGG_Mineral_absorption_Main_Pathway	KEGG_Mineral_absorption_Main_Pathway	KEGG_Cell_cycle_Main_Pathway	KEGG_Cell_cycle_Main_Pathway	KEGG_Mineral_absorption_Main_Pathway	KEGG_Mineral_absorption_Main_Pathway	KEGG_Mineral_absorption_Main_Pathway	KEGG_Mineral_absorption_Main_Pathway	KEGG_Mineral_absorption_Main_Pathway
Akt_Signaling_Pathway_Survival_Genes	AHR_Pathway_PS2_Gene_expression_via_ESR1	BRCA1_Pathway_E2_Responsive_Genes	KEGG_Cell_cycle_Main_Pathway	Akt_Signaling_Pathway_Survival_Genes	KEGG_Cell_cycle_Main_Pathway	NA	NCI_Lissencephaly_gene_LIS1_in_neuronal_migration_and_development_Pathway_(microtubule_based_movement)	KEGG_Mineral_absorption_Main_Pathway	KEGG_Mineral_absorption_Main_Pathway	NA	NA	NA	NCI_Lissencephaly_gene_LIS1_in_neuronal_migration_and_development_Pathway_(microtubule_based_movement)	NA
ATM_Pathway	Akt_Signaling_Pathway	BRCA1_Pathway_G1_S_arrest	KEGG_Mineral_absorption_Main_Pathway	ATM_Pathway	KEGG_Mineral_absorption_Main_Pathway	NA	NA	NCI_Lissencephaly_gene_LIS1_in_neuronal_migration_and_development_Pathway_(microtubule_based_movement)	NCI_Arf6_trafficking_events_Pathway_(membrane_fusion)	NA	NA	NA	NA	NA
ATM_Pathway_G2-Mitosis_progression	Akt_Signaling_Pathway_Blood_cell_differentiation	KEGG_Basal_cell_carcinoma_Main_Pathway	NCI_Arf6_trafficking_events_Pathway_(membrane_fusion)	ATM_Pathway_G2-Mitosis_progression	NA	NA	NA	NA	NCI_Lissencephaly_gene_LIS1_in_neuronal_migration_and_development_Pathway_(microtubule_based_movement)	NA	NA	NA	NA	NA
ATM_Pathway_G2_M_Checkpoint_Arrest	Akt_Signaling_Pathway_Cell_Cycle	KEGG_Cell_cycle_Main_Pathway	NCI_ATF_2_transcription_factor_network_Main_Pathway	ATM_Pathway_G2_M_Checkpoint_Arrest	NA	NA	NA	NA	NCI_Presenilin_action_in_Notch_and_Wnt_signaling_Pathway_(apoptosis)	NA	NA	NA	NA	NA
BRCA1_Pathway_E2_Responsive_Genes	Akt_Signaling_Pathway_Cell_Cycle_Progression	KEGG_Lysine_biosynthesis_Main_Pathway	NCI_Lissencephaly_gene_LIS1_in_neuronal_migration_and_development_Pathway_(microtubule_based_movement)	KEGG_Allograft_rejection_Main_Pathway	NA	NA	NA	NA	NCI_Signaling_events_mediated_by_VEGFR1_and_VEGFR2_Pathway_(Pathway_degradation_of_AKAP1)	NA	NA	NA	NA	NA
BRCA1_Pathway_G1_S_arrest	Akt_Signaling_Pathway_Cell_Survival	KEGG_Mineral_absorption_Main_Pathway	NCI_Presenilin_action_in_Notch_and_Wnt_signaling_Pathway_(apoptosis)	KEGG_Cell_cycle_Main_Pathway	NA	NA	NA	NA	reactome_Progressive_trimming_of_alpha_1_2_linked_mannose_residues_from_Man9_8_7GlcNAc2_to_produce_Man5GlcNAc2_Main_Pathway	NA	NA	NA	NA	NA
CD40_Pathway_Gene_Expression_Cell_Adhesion_Molecule_via_NFKB2	Akt_Signaling_Pathway_Genetic_Stability	NCI_Alpha_synuclein_signaling_Pathway_(Pathway_negative_regulation_of_transcription_via_SNCA)	NCI_Signaling_events_mediated_by_VEGFR1_and_VEGFR2_Pathway_(Pathway_degradation_of_AKAP1)	KEGG_Glycosaminoglycan_degradation_Main_Pathway	NA	NA	NA	NA	reactome_Purine_salvage_Main_Pathway	NA	NA	NA	NA	NA
CD40_Pathway_Gene_Expression_Cell_Survival_via_NFKB2	Akt_Signaling_Pathway_Glucose_Uptake	NCI_Alpha_synuclein_signaling_Pathway_(Pathway_positive_regulation_of_gene_specific_transcription_via_SNCA)	NCI_Syndecan_2_mediated_signaling_events_Pathway_(positive_regulation_of_cell_cell_adhesion)	KEGG_Mineral_absorption_Main_Pathway	NA	NA	NA	NA	NA	NA	NA	NA	NA	NA
CD40_Pathway_Gene_Expression_Co-Stimulatory_Molecules_via_NFKB2	Akt_Signaling_Pathway_Increased_GLUT4_translocation	NCI_Arf6_trafficking_events_Pathway_(membrane_fusion)	reactome_Progressive_trimming_of_alpha_1_2_linked_mannose_residues_from_Man9_8_7GlcNAc2_to_produce_Man5GlcNAc2_Main_Pathway	KEGG_p53_signaling_Main_Pathway	NA	NA	NA	NA	NA	NA	NA	NA	NA	NA
CD40_Pathway_Gene_Expression_COX2_and_Prostaglandins_via_NFKB2	Akt_Signaling_Pathway_Induction_of_Chromatin_Condensation	NCI_CDC42_signaling_events_Pathway_(retrograde_vesicle_mediated_transport_Golgi_to_ER)	reactome_Purine_salvage_Main_Pathway	KEGG_Prion_diseases_Main_Pathway	NA	NA	NA	NA	NA	NA	NA	NA	NA	NA
CD40_Pathway_Gene_Expression_Immunoglobulin_Class_Switch_via_NFKB2	Akt_Signaling_Pathway_JNK_mediated_apoptosis	NCI_IL8_and_CXCR1_mediated_signaling_events_Pathway_(chemotaxis)	NA	KEGG_Synaptic_vesicle_cycle_Main_Pathway	NA	NA	NA	NA	NA	NA	NA	NA	NA	NA
CD40_Pathway_Gene_Expression_Pro-Inflamatory_Cytokines_via_NFKB2	Akt_Signaling_Pathway_Promotes_Adipogenesis	NCI_Lissencephaly_gene_LIS1_in_neuronal_migration_and_development_Pathway_(microtubule_based_movement)	NA	NCI_Alpha6_beta4_integrin_ligand_interactions_Main_Pathway	NA	NA	NA	NA	NA	NA	NA	NA	NA	NA
CD40_Pathway_Gene_Expression_Procoagulant_Activity_via_NFKB2	Akt_Signaling_Pathway_Regulation_of_Na+_Transport	NCI_Presenilin_action_in_Notch_and_Wnt_signaling_Pathway_(apoptosis)	NA	NCI_Angiopoietin_receptor_Tie2_mediated_signaling_Main_Pathway	NA	NA	NA	NA	NA	NA	NA	NA	NA	NA
Cellular_Apoptosis_Pathway_Gene_Expression_FLIP_CIAP2_BFL1_BCL2_via_NFKB2	Akt_Signaling_Pathway_Splicing_Regulation	NCI_RAC1_signaling_Pathway_(lamellipodium_assembly)	NA	NCI_Arf6_downstream_Pathway_(cortical_actin_cytoskeleton_organization)	NA	NA	NA	NA	NA	NA	NA	NA	NA	NA
Erythropoietin_Pathway_Gene_Expression_Neuroprotection_via_NFKB2	Akt_Signaling_Pathway_Survival_Genes	NCI_Signaling_events_mediated_by_VEGFR1_and_VEGFR2_Pathway_(Pathway_degradation_of_AKAP1)	NA	NCI_Arf6_downstream_Pathway_(lamellipodium_assembly)	NA	NA	NA	NA	NA	NA	NA	NA	NA	NA
KEGG_Allograft_rejection_Main_Pathway	Akt_Signaling_Pathway_Tumor_Supression	NCI_Trk_receptor_signaling_mediated_by_PI3K_and_PLC_gamma_Pathway_(regulation_of_long_term_neuronal_synaptic_plasticity)	NA	NCI_Arf6_trafficking_events_Pathway_(endocytosis)	NA	NA	NA	NA	NA	NA	NA	NA	NA	NA
KEGG_Cell_cycle_Main_Pathway	ATM_Pathway	reactome_Progressive_trimming_of_alpha_1_2_linked_mannose_residues_from_Man9_8_7GlcNAc2_to_produce_Man5GlcNAc2_Main_Pathway	NA	NCI_Beta1_integrin_cell_surface_interactions_Main_Pathway	NA	NA	NA	NA	NA	NA	NA	NA	NA	NA
KEGG_Glycosaminoglycan_degradation_Main_Pathway	ATM_Pathway_Cell_Survival	reactome_Purine_salvage_Main_Pathway	NA	NCI_Beta3_integrin_cell_surface_interactions_Main_Pathway	NA	NA	NA	NA	NA	NA	NA	NA	NA	NA
KEGG_Mineral_absorption_Main_Pathway	ATM_Pathway_G2-Mitosis_progression	NA	NA	NCI_Beta5_beta6_beta7_and_beta8_integrin_cell_surface_interactions_Main_Pathway	NA	NA	NA	NA	NA	NA	NA	NA	NA	NA
KEGG_p53_signaling_Main_Pathway	ATM_Pathway_G2_M_Checkpoint_Arrest	NA	NA	NCI_Caspase_Cascade_in_Apoptosis_Pathway_(apoptotic_nuclear_changes)	NA	NA	NA	NA	NA	NA	NA	NA	NA	NA
KEGG_Prion_diseases_Main_Pathway	cAMP_Pathway_Cytokine_Production	NA	NA	NCI_Class_I_PI3K_signaling_events_mediated_by_Akt_Pathway_(negative_regulation_of_cell_cycle)	NA	NA	NA	NA	NA	NA	NA	NA	NA	NA
KEGG_Synaptic_vesicle_cycle_Main_Pathway	cAMP_Pathway_Glycolisis	NA	NA	NCI_Coregulation_of_Androgen_receptor_activity_Main_Pathway	NA	NA	NA	NA	NA	NA	NA	NA	NA	NA
MAPK_Signaling_Pathway_Cell_Survival	CD40_Pathway_Cell_Survival	NA	NA	NCI_Coregulation_of_Androgen_receptor_activity_Pathway_(cell_proliferation)	NA	NA	NA	NA	NA	NA	NA	NA	NA	NA
mTOR_Pathway_Inflammation_Stress_Resistance	Cellular_Apoptosis_Pathway	NA	NA	NCI_CXCR3_mediated_signaling_events_Pathway_(regulation_of_stress_fiber_assembly)	NA	NA	NA	NA	NA	NA	NA	NA	NA	NA
NCI_Alpha6_beta4_integrin_ligand_interactions_Main_Pathway	Cellular_Apoptosis_Pathway_DNA_Fragmentation	NA	NA	NCI_E2F_transcription_factor_network_Main_Pathway	NA	NA	NA	NA	NA	NA	NA	NA	NA	NA
NCI_Alternative_NF_kappaB_Main_Pathway	Circadian_Pathway	NA	NA	NCI_EGFR_dependent_Endothelin_signaling_events_Main_Pathway	NA	NA	NA	NA	NA	NA	NA	NA	NA	NA
NCI_Alternative_NF_kappaB_Pathway_(regulation_of_B_cell_activation)	CREB_Pathway	NA	NA	NCI_Endothelins_Main_Pathway	NA	NA	NA	NA	NA	NA	NA	NA	NA	NA
NCI_Angiopoietin_receptor_Tie2_mediated_signaling_Main_Pathway	EGF_Pathway_Cytoskeleton_Regulation	NA	NA	NCI_Endothelins_Pathway_(cAMP_biosynthetic_process)	NA	NA	NA	NA	NA	NA	NA	NA	NA	NA
NCI_Arf6_downstream_Pathway_(cortical_actin_cytoskeleton_organization)	EGF_Pathway_EGFR_Endocytosis	NA	NA	NCI_Endothelins_Pathway_(positive_regulation_of_muscle_contraction)	NA	NA	NA	NA	NA	NA	NA	NA	NA	NA
NCI_Arf6_downstream_Pathway_(lamellipodium_assembly)	EGF_Pathway_IP3_Signaling	NA	NA	NCI_EPHA2_forward_signaling_Main_Pathway	NA	NA	NA	NA	NA	NA	NA	NA	NA	NA
NCI_Arf6_trafficking_events_Pathway_(endocytosis)	ERK_Signaling_Pathway	NA	NA	NCI_ErbB4_signaling_events_Pathway_(apoptosis)	NA	NA	NA	NA	NA	NA	NA	NA	NA	NA
NCI_Beta1_integrin_cell_surface_interactions_Main_Pathway	ERK_Signaling_Pathway_EGFR_signaling	NA	NA	NCI_ErbB4_signaling_events_Pathway_(axon_guidance)	NA	NA	NA	NA	NA	NA	NA	NA	NA	NA
NCI_Beta3_integrin_cell_surface_interactions_Main_Pathway	Estrogen_Pathway	NA	NA	NCI_ErbB4_signaling_events_Pathway_(cell_proliferation)	NA	NA	NA	NA	NA	NA	NA	NA	NA	NA
NCI_Beta5_beta6_beta7_and_beta8_integrin_cell_surface_interactions_Main_Pathway	FLT3_Signaling_Pathway_Translation	NA	NA	NCI_ErbB4_signaling_events_Pathway_(chemotaxis)	NA	NA	NA	NA	NA	NA	NA	NA	NA	NA
NCI_Caspase_Cascade_in_Apoptosis_Pathway_(apoptotic_nuclear_changes)	Growth_Hormone_Signaling_Pathway	NA	NA	NCI_ErbB4_signaling_events_Pathway_(dendrite_morphogenesis)	NA	NA	NA	NA	NA	NA	NA	NA	NA	NA
NCI_Caspase_Cascade_in_Apoptosis_Pathway_(neuron_apoptosis)	Growth_Hormone_Signaling_Pathway_Cell_Survival	NA	NA	NCI_ErbB4_signaling_events_Pathway_(epithelial_cell_differentiation)	NA	NA	NA	NA	NA	NA	NA	NA	NA	NA
NCI_CD40_CD40L_signaling_Pathway_(proteasomal_ubiquitin_dependent_protein_catabolic_process)	Growth_Hormone_Signaling_Pathway_Gene_Expression_via_SRF_ELK1_STAT5B_CEBPD_STAT1_STAT3	NA	NA	NCI_ErbB4_signaling_events_Pathway_(heart_development)	NA	NA	NA	NA	NA	NA	NA	NA	NA	NA
NCI_Class_I_PI3K_signaling_events_mediated_by_Akt_Pathway_(negative_regulation_of_cell_cycle)	Growth_Hormone_Signaling_Pathway_Glucose_Uptake	NA	NA	NCI_ErbB4_signaling_events_Pathway_(neural_crest_cell_migration)	NA	NA	NA	NA	NA	NA	NA	NA	NA	NA
NCI_Coregulation_of_Androgen_receptor_activity_Main_Pathway	Growth_Hormone_Signaling_Pathway_Protein_Synthesis	NA	NA	NCI_FAS_CD95_signaling_Main_Pathway	NA	NA	NA	NA	NA	NA	NA	NA	NA	NA
NCI_Coregulation_of_Androgen_receptor_activity_Pathway_(cell_proliferation)	GSK3_Signaling_Pathway_Protein_Synthesis	NA	NA	NCI_FAS_CD95_signaling_Pathway_(neuron_projection_development)	NA	NA	NA	NA	NA	NA	NA	NA	NA	NA
NCI_CXCR3_mediated_signaling_events_Pathway_(regulation_of_stress_fiber_assembly)	HIF1Alpha_Pathway_Gene_Expression_via_JUN_CREB3	NA	NA	NCI_Glypican_1_network_Main_Pathway	NA	NA	NA	NA	NA	NA	NA	NA	NA	NA
NCI_E2F_transcription_factor_network_Main_Pathway	HIF1Alpha_Pathway_HIF1a_Degradation	NA	NA	NCI_Glypican_1_network_Pathway_(BMP_signaling_pathway)	NA	NA	NA	NA	NA	NA	NA	NA	NA	NA
NCI_EGFR_dependent_Endothelin_signaling_events_Main_Pathway	HIF1Alpha_Pathway_NOS_Pathway	NA	NA	NCI_Glypican_1_network_Pathway_(cell_growth)	NA	NA	NA	NA	NA	NA	NA	NA	NA	NA
NCI_Endothelins_Main_Pathway	HIF1Alpha_Pathway_VEGF_Pathway	NA	NA	NCI_Glypican_1_network_Pathway_(fibroblast_growth_factor_receptor_signaling_pathway)	NA	NA	NA	NA	NA	NA	NA	NA	NA	NA
NCI_Endothelins_Pathway_(cAMP_biosynthetic_process)	IGF1R_Signaling_Pathway	NA	NA	NCI_p53_Main_Pathway	NA	NA	NA	NA	NA	NA	NA	NA	NA	NA
NCI_Endothelins_Pathway_(positive_regulation_of_muscle_contraction)	IGF1R_Signaling_Pathway_Cell_Migration	NA	NA	NCI_p53_Pathway_(apoptosis)	NA	NA	NA	NA	NA	NA	NA	NA	NA	NA
NCI_EPHA2_forward_signaling_Main_Pathway	IL-10_Pathway_Stability_Determination	NA	NA	NCI_p53_Pathway_(proteasomal_ubiquitin_dependent_protein_catabolic_process)	NA	NA	NA	NA	NA	NA	NA	NA	NA	NA
NCI_Ephrin_B_reverse_signaling_Pathway_(endothelial_cell_proliferation)	IL-2_Pathway_Apoptosis_Inhibition	NA	NA	NCI_PLK3_signaling_events_Main_Pathway	NA	NA	NA	NA	NA	NA	NA	NA	NA	NA
NCI_ErbB4_signaling_events_Pathway_(apoptosis)	IL-6_Pathway	NA	NA	NCI_Signaling_events_mediated_by_HDAC_Class_III_Pathway_(regulation_of_S_phase_of_mitotic_cell_cycle)	NA	NA	NA	NA	NA	NA	NA	NA	NA	NA
NCI_ErbB4_signaling_events_Pathway_(axon_guidance)	ILK_Signaling_Pathway	NA	NA	NCI_Signaling_events_mediated_by_Stem_cell_factor_receptor_c_Kit__Pathway_(actin_filament_polymerization)	NA	NA	NA	NA	NA	NA	NA	NA	NA	NA
NCI_ErbB4_signaling_events_Pathway_(cell_proliferation)	ILK_Signaling_Pathway_Actin_Polymerization_Cytoskeletal_Reorganization	NA	NA	NCI_Signaling_events_mediated_by_Stem_cell_factor_receptor_c_Kit__Pathway_(cell_migration)	NA	NA	NA	NA	NA	NA	NA	NA	NA	NA
NCI_ErbB4_signaling_events_Pathway_(chemotaxis)	ILK_Signaling_Pathway_Cell_Migration_Retraction	NA	NA	NCI_Signaling_events_mediated_by_Stem_cell_factor_receptor_c_Kit__Pathway_(cell_motility)	NA	NA	NA	NA	NA	NA	NA	NA	NA	NA
NCI_ErbB4_signaling_events_Pathway_(dendrite_morphogenesis)	ILK_Signaling_Pathway_Cell_Motility	NA	NA	NCI_Signaling_events_mediated_by_Stem_cell_factor_receptor_c_Kit__Pathway_(positive_regulation_of_cell_proliferation)	NA	NA	NA	NA	NA	NA	NA	NA	NA	NA
NCI_ErbB4_signaling_events_Pathway_(epithelial_cell_differentiation)	ILK_Signaling_Pathway_Cytoskeletal_Adhesion_Complexes	NA	NA	NCI_Urokinase_type_plasminogen_activator_uPA_and_uPAR_mediated_signaling_Main_Pathway	NA	NA	NA	NA	NA	NA	NA	NA	NA	NA
NCI_ErbB4_signaling_events_Pathway_(heart_development)	ILK_Signaling_Pathway_Epithelial_Mesenchymal_Transition_Tubulo-Interstitial_Fibrosis	NA	NA	NCI_VEGF_and_VEGFR_signaling_network_Main_Pathway	NA	NA	NA	NA	NA	NA	NA	NA	NA	NA
NCI_ErbB4_signaling_events_Pathway_(neural_crest_cell_migration)	ILK_Signaling_Pathway_Induced_Cell_Proliferation	NA	NA	NCI_VEGFR1_specific_signals_Main_Pathway	NA	NA	NA	NA	NA	NA	NA	NA	NA	NA
NCI_FAS_CD95_signaling_Main_Pathway	ILK_Signaling_Pathway_Migration_Vasculogenesis	NA	NA	reactome_Acyl_chain_remodeling_of_DAG_and_TAG_Main_Pathway	NA	NA	NA	NA	NA	NA	NA	NA	NA	NA
NCI_FAS_CD95_signaling_Pathway_(neuron_projection_development)	ILK_Signaling_Pathway_Opsonization	NA	NA	reactome_Amino_acid_and_oligopeptide_SLC_transporters_Main_Pathway	NA	NA	NA	NA	NA	NA	NA	NA	NA	NA
NCI_Glypican_1_network_Main_Pathway	IP3_Pathway	NA	NA	reactome_Antigen_Presentation_Folding_assembly_and_peptide_loading_of_class_I_MHC_Main_Pathway	NA	NA	NA	NA	NA	NA	NA	NA	NA	NA
NCI_Glypican_1_network_Pathway_(BMP_signaling_pathway)	JAK-STAT_Pathway_IFN-Inducible_Gene_Expression_via_STAT2_STAT1	NA	NA	reactome_Apoptotic_cleavage_of_cell_adhesion_proteins_Main_Pathway	NA	NA	NA	NA	NA	NA	NA	NA	NA	NA
NCI_Glypican_1_network_Pathway_(cell_growth)	KEGG_Adrenergic_signaling_in_cardiomyocytes_Main_Pathway	NA	NA	reactome_Arachidonate_production_from_DAG_Main_Pathway	NA	NA	NA	NA	NA	NA	NA	NA	NA	NA
NCI_Glypican_1_network_Pathway_(fibroblast_growth_factor_receptor_signaling_pathway)	KEGG_African_trypanosomiasis_Main_Pathway	NA	NA	reactome_Asymmetric_localization_of_PCP_proteins_Main_Pathway	NA	NA	NA	NA	NA	NA	NA	NA	NA	NA
NCI_HIV_1_Nef_Negative_effector_of_Fas_and_TNF_alpha_Pathway_(Pathway_degradation_of_CASP3_CASP7_CASP6)	KEGG_Allograft_rejection_Main_Pathway	NA	NA	reactome_Caspase_mediated_cleavage_of_cytoskeletal_proteins_Main_Pathway	NA	NA	NA	NA	NA	NA	NA	NA	NA	NA
NCI_p53_Main_Pathway	KEGG_Amino_sugar_and_nucleotide_sugar_metabolism_Main_Pathway	NA	NA	reactome_Clathrin_derived_vesicle_budding_Main_Pathway	NA	NA	NA	NA	NA	NA	NA	NA	NA	NA
NCI_p53_Pathway_(apoptosis)	KEGG_Amoebiasis_Main_Pathway	NA	NA	reactome_Cross_presentation_of_particulate_exogenous_antigens_phagosomes__Main_Pathway	NA	NA	NA	NA	NA	NA	NA	NA	NA	NA
NCI_p53_Pathway_(proteasomal_ubiquitin_dependent_protein_catabolic_process)	KEGG_Amyotrophic_lateral_sclerosis_ALS__Main_Pathway	NA	NA	reactome_Crosslinking_of_collagen_fibrils_Main_Pathway	NA	NA	NA	NA	NA	NA	NA	NA	NA	NA
NCI_PLK3_signaling_events_Main_Pathway	KEGG_Antigen_processing_and_presentation_Main_Pathway	NA	NA	reactome_Cyclin_D_associated_events_in_G1_Main_Pathway	NA	NA	NA	NA	NA	NA	NA	NA	NA	NA
NCI_Signaling_events_mediated_by_HDAC_Class_III_Pathway_(regulation_of_S_phase_of_mitotic_cell_cycle)	KEGG_Arrhythmogenic_right_ventricular_cardiomyopathy_ARVC__Main_Pathway	NA	NA	reactome_Dissolution_of_Fibrin_Clot_Main_Pathway	NA	NA	NA	NA	NA	NA	NA	NA	NA	NA
NCI_Signaling_events_mediated_by_Stem_cell_factor_receptor_c_Kit__Pathway_(actin_filament_polymerization)	KEGG_Butirosin_and_neomycin_biosynthesis_Main_Pathway	NA	NA	reactome_Elastic_fibre_formation_Main_Pathway	NA	NA	NA	NA	NA	NA	NA	NA	NA	NA
NCI_Signaling_events_mediated_by_Stem_cell_factor_receptor_c_Kit__Pathway_(cell_migration)	KEGG_Caffeine_metabolism_Main_Pathway	NA	NA	reactome_Endosomal_Vacuolar_Main_Pathway	NA	NA	NA	NA	NA	NA	NA	NA	NA	NA
NCI_Signaling_events_mediated_by_Stem_cell_factor_receptor_c_Kit__Pathway_(cell_motility)	KEGG_Cell_cycle_Main_Pathway	NA	NA	reactome_ER_Quality_Control_Compartment_ERQC__Main_Pathway	NA	NA	NA	NA	NA	NA	NA	NA	NA	NA
NCI_Signaling_events_mediated_by_Stem_cell_factor_receptor_c_Kit__Pathway_(positive_regulation_of_cell_proliferation)	KEGG_Circadian_rhythm_Main_Pathway	NA	NA	reactome_FasL_CD95L_signaling_Main_Pathway	NA	NA	NA	NA	NA	NA	NA	NA	NA	NA
NCI_Urokinase_type_plasminogen_activator_uPA_and_uPAR_mediated_signaling_Main_Pathway	KEGG_Collecting_duct_acid_secretion_Main_Pathway	NA	NA	reactome_Glycosphingolipid_metabolism_Main_Pathway	NA	NA	NA	NA	NA	NA	NA	NA	NA	NA
NCI_VEGF_and_VEGFR_signaling_network_Main_Pathway	KEGG_Complement_and_coagulation_cascades_Main_Pathway	NA	NA	reactome_Interconversion_of_polyamines_Main_Pathway	NA	NA	NA	NA	NA	NA	NA	NA	NA	NA
NCI_VEGFR1_specific_signals_Main_Pathway	KEGG_Dorso_ventral_axis_formation_Main_Pathway	NA	NA	reactome_Interleukin_6_signaling_Main_Pathway	NA	NA	NA	NA	NA	NA	NA	NA	NA	NA
reactome_Acyl_chain_remodeling_of_DAG_and_TAG_Main_Pathway	KEGG_ECM_receptor_interaction_Main_Pathway	NA	NA	reactome_IRS_activation_Main_Pathway	NA	NA	NA	NA	NA	NA	NA	NA	NA	NA
reactome_AKT_phosphorylates_targets_in_the_cytosol_Main_Pathway	KEGG_Endocrine_and_other_factor_regulated_calcium_reabsorption_Main_Pathway	NA	NA	reactome_L1CAM_interactions_Main_Pathway	NA	NA	NA	NA	NA	NA	NA	NA	NA	NA
reactome_Amino_acid_and_oligopeptide_SLC_transporters_Main_Pathway	KEGG_Endocytosis_Main_Pathway	NA	NA	reactome_Nectin_Necl_trans_heterodimerization_Main_Pathway	NA	NA	NA	NA	NA	NA	NA	NA	NA	NA
reactome_Antigen_Presentation_Folding_assembly_and_peptide_loading_of_class_I_MHC_Main_Pathway	KEGG_ErbB_signaling_Main_Pathway	NA	NA	reactome_Nicotinate_metabolism_Main_Pathway	NA	NA	NA	NA	NA	NA	NA	NA	NA	NA
reactome_Apoptotic_cleavage_of_cell_adhesion_proteins_Main_Pathway	KEGG_Fat_digestion_and_absorption_Main_Pathway	NA	NA	reactome_Organic_anion_transporters_Main_Pathway	NA	NA	NA	NA	NA	NA	NA	NA	NA	NA
reactome_Arachidonate_production_from_DAG_Main_Pathway	KEGG_Glycosaminoglycan_biosynthesis_chondroitin_sulfate_dermatan_sulfate_Main_Pathway	NA	NA	reactome_Organic_cation_transport_Main_Pathway	NA	NA	NA	NA	NA	NA	NA	NA	NA	NA
reactome_Asymmetric_localization_of_PCP_proteins_Main_Pathway	KEGG_Glycosaminoglycan_biosynthesis_heparan_sulfate_heparin_Main_Pathway	NA	NA	reactome_Oxidative_Stress_Induced_Senescence_Main_Pathway	NA	NA	NA	NA	NA	NA	NA	NA	NA	NA
reactome_Caspase_mediated_cleavage_of_cytoskeletal_proteins_Main_Pathway	KEGG_Glycosaminoglycan_degradation_Main_Pathway	NA	NA	reactome_Plasmalogen_biosynthesis_Main_Pathway	NA	NA	NA	NA	NA	NA	NA	NA	NA	NA
reactome_Clathrin_derived_vesicle_budding_Main_Pathway	KEGG_Glycosphingolipid_biosynthesis_ganglio_series_Main_Pathway	NA	NA	reactome_PLC_beta_mediated_events_Main_Pathway	NA	NA	NA	NA	NA	NA	NA	NA	NA	NA
reactome_Cross_presentation_of_particulate_exogenous_antigens_phagosomes__Main_Pathway	KEGG_Hepatitis_C_Main_Pathway	NA	NA	reactome_Regulation_by_c_FLIP_Main_Pathway	NA	NA	NA	NA	NA	NA	NA	NA	NA	NA
reactome_Crosslinking_of_collagen_fibrils_Main_Pathway	KEGG_HIF_1_signaling_Main_Pathway	NA	NA	reactome_Regulation_of_KIT_signaling_Main_Pathway	NA	NA	NA	NA	NA	NA	NA	NA	NA	NA
reactome_Cyclin_D_associated_events_in_G1_Main_Pathway	KEGG_Huntington_s_disease_Main_Pathway	NA	NA	reactome_RIG_I_MDA5_mediated_induction_of_IFN_alpha_beta_pathways_Main_Pathway	NA	NA	NA	NA	NA	NA	NA	NA	NA	NA
reactome_Dissolution_of_Fibrin_Clot_Main_Pathway	KEGG_Inflammatory_mediator_regulation_of_TRP_channels_Main_Pathway	NA	NA	reactome_RNA_Polymerase_I_Promoter_Opening_Main_Pathway	NA	NA	NA	NA	NA	NA	NA	NA	NA	NA
reactome_Elastic_fibre_formation_Main_Pathway	KEGG_Inositol_phosphate_metabolism_Main_Pathway	NA	NA	reactome_Signaling_by_ERBB4_Main_Pathway	NA	NA	NA	NA	NA	NA	NA	NA	NA	NA
reactome_Endosomal_Vacuolar_Main_Pathway	KEGG_Intestinal_immune_network_for_IgA_production_Main_Pathway	NA	NA	reactome_Stabilization_of_p53_Main_Pathway	NA	NA	NA	NA	NA	NA	NA	NA	NA	NA
reactome_ER_Quality_Control_Compartment_ERQC__Main_Pathway	KEGG_Legionellosis_Main_Pathway	NA	NA	reactome_Sulfide_oxidation_to_sulfate_Main_Pathway	NA	NA	NA	NA	NA	NA	NA	NA	NA	NA
reactome_FasL_CD95L_signaling_Main_Pathway	KEGG_Leishmaniasis_Main_Pathway	NA	NA	reactome_Synthesis_of_UDP_N_acetyl_glucosamine_Main_Pathway	NA	NA	NA	NA	NA	NA	NA	NA	NA	NA
reactome_Glycosphingolipid_metabolism_Main_Pathway	KEGG_Linoleic_acid_metabolism_Main_Pathway	NA	NA	reactome_The_activation_of_arylsulfatases_Main_Pathway	NA	NA	NA	NA	NA	NA	NA	NA	NA	NA
reactome_Inflammasomes_Main_Pathway	KEGG_Lysosome_Main_Pathway	NA	NA	reactome_The_NLRP1_inflammasome_Main_Pathway	NA	NA	NA	NA	NA	NA	NA	NA	NA	NA
reactome_Interconversion_of_polyamines_Main_Pathway	KEGG_Malaria_Main_Pathway	NA	NA	reactome_Toxicity_of_botulinum_toxin_type_B_BoNT_B__Main_Pathway	NA	NA	NA	NA	NA	NA	NA	NA	NA	NA
reactome_Interleukin_1_processing_Main_Pathway	KEGG_Maturity_onset_diabetes_of_the_young_Main_Pathway	NA	NA	reactome_Toxicity_of_botulinum_toxin_type_G_BoNT_G__Main_Pathway	NA	NA	NA	NA	NA	NA	NA	NA	NA	NA
reactome_Interleukin_1_signaling_Main_Pathway	KEGG_Melanogenesis_Main_Pathway	NA	NA	reactome_TRAIL_signaling_Main_Pathway	NA	NA	NA	NA	NA	NA	NA	NA	NA	NA
reactome_Interleukin_6_signaling_Main_Pathway	KEGG_MicroRNAs_in_cancer_Main_Pathway	NA	NA	reactome_Transport_and_synthesis_of_PAPS_Main_Pathway	NA	NA	NA	NA	NA	NA	NA	NA	NA	NA
reactome_IRS_activation_Main_Pathway	KEGG_Mineral_absorption_Main_Pathway	NA	NA	reactome_Transport_of_inorganic_cations_anions_and_amino_acids_oligopeptides_Main_Pathway	NA	NA	NA	NA	NA	NA	NA	NA	NA	NA
reactome_L1CAM_interactions_Main_Pathway	KEGG_Nicotinate_and_nicotinamide_metabolism_Main_Pathway	NA	NA	reactome_VEGF_binds_to_VEGFR_leading_to_receptor_dimerization_Main_Pathway	NA	NA	NA	NA	NA	NA	NA	NA	NA	NA
reactome_MyD88_dependent_cascade_initiated_on_endosome_Main_Pathway	KEGG_Notch_signaling_Main_Pathway	NA	NA	NA	NA	NA	NA	NA	NA	NA	NA	NA	NA	NA
reactome_Nectin_Necl_trans_heterodimerization_Main_Pathway	KEGG_Other_glycan_degradation_Main_Pathway	NA	NA	NA	NA	NA	NA	NA	NA	NA	NA	NA	NA	NA
reactome_Nicotinate_metabolism_Main_Pathway	KEGG_Other_types_of_O_glycan_biosynthesis_Main_Pathway	NA	NA	NA	NA	NA	NA	NA	NA	NA	NA	NA	NA	NA
reactome_Organic_anion_transporters_Main_Pathway	KEGG_Oxytocin_signaling_Main_Pathway	NA	NA	NA	NA	NA	NA	NA	NA	NA	NA	NA	NA	NA
reactome_Organic_cation_transport_Main_Pathway	KEGG_p53_signaling_Main_Pathway	NA	NA	NA	NA	NA	NA	NA	NA	NA	NA	NA	NA	NA
reactome_Oxidative_Stress_Induced_Senescence_Main_Pathway	KEGG_Pancreatic_secretion_Main_Pathway	NA	NA	NA	NA	NA	NA	NA	NA	NA	NA	NA	NA	NA
reactome_p53_Dependent_G1_DNA_Damage_Response_Main_Pathway	KEGG_Pathways_in_cancer_Main_Pathway	NA	NA	NA	NA	NA	NA	NA	NA	NA	NA	NA	NA	NA
reactome_PCP_CE_Main_Pathway	KEGG_Pertussis_Main_Pathway	NA	NA	NA	NA	NA	NA	NA	NA	NA	NA	NA	NA	NA
reactome_Plasmalogen_biosynthesis_Main_Pathway	KEGG_Phosphatidylinositol_signaling_system_Main_Pathway	NA	NA	NA	NA	NA	NA	NA	NA	NA	NA	NA	NA	NA
reactome_PLC_beta_mediated_events_Main_Pathway	KEGG_PI3K_Akt_signaling_Main_Pathway	NA	NA	NA	NA	NA	NA	NA	NA	NA	NA	NA	NA	NA
reactome_Prostanoid_ligand_receptors_Main_Pathway	KEGG_Prion_diseases_Main_Pathway	NA	NA	NA	NA	NA	NA	NA	NA	NA	NA	NA	NA	NA
reactome_Regulation_by_c_FLIP_Main_Pathway	KEGG_Prolactin_signaling_Main_Pathway	NA	NA	NA	NA	NA	NA	NA	NA	NA	NA	NA	NA	NA
reactome_Regulation_of_KIT_signaling_Main_Pathway	KEGG_Rap1_signaling_Main_Pathway	NA	NA	NA	NA	NA	NA	NA	NA	NA	NA	NA	NA	NA
reactome_RIG_I_MDA5_mediated_induction_of_IFN_alpha_beta_pathways_Main_Pathway	KEGG_Renin_angiotensin_system_Main_Pathway	NA	NA	NA	NA	NA	NA	NA	NA	NA	NA	NA	NA	NA
reactome_RNA_Polymerase_I_Promoter_Opening_Main_Pathway	KEGG_Riboflavin_metabolism_Main_Pathway	NA	NA	NA	NA	NA	NA	NA	NA	NA	NA	NA	NA	NA
reactome_Role_of_Abl_in_Robo_Slit_signaling_Main_Pathway	KEGG_Small_cell_lung_cancer_Main_Pathway	NA	NA	NA	NA	NA	NA	NA	NA	NA	NA	NA	NA	NA
reactome_SHC_activation_Main_Pathway	KEGG_Sphingolipid_metabolism_Main_Pathway	NA	NA	NA	NA	NA	NA	NA	NA	NA	NA	NA	NA	NA
reactome_Signaling_by_ERBB4_Main_Pathway	KEGG_Staphylococcus_aureus_infection_Main_Pathway	NA	NA	NA	NA	NA	NA	NA	NA	NA	NA	NA	NA	NA
reactome_Stabilization_of_p53_Main_Pathway	KEGG_Starch_and_sucrose_metabolism_Main_Pathway	NA	NA	NA	NA	NA	NA	NA	NA	NA	NA	NA	NA	NA
reactome_Sulfide_oxidation_to_sulfate_Main_Pathway	KEGG_Steroid_biosynthesis_Main_Pathway	NA	NA	NA	NA	NA	NA	NA	NA	NA	NA	NA	NA	NA
reactome_Synthesis_of_UDP_N_acetyl_glucosamine_Main_Pathway	KEGG_Steroid_hormone_biosynthesis_Main_Pathway	NA	NA	NA	NA	NA	NA	NA	NA	NA	NA	NA	NA	NA
reactome_The_activation_of_arylsulfatases_Main_Pathway	KEGG_Sulfur_metabolism_Main_Pathway	NA	NA	NA	NA	NA	NA	NA	NA	NA	NA	NA	NA	NA
reactome_The_NLRP1_inflammasome_Main_Pathway	KEGG_Synaptic_vesicle_cycle_Main_Pathway	NA	NA	NA	NA	NA	NA	NA	NA	NA	NA	NA	NA	NA
reactome_Toxicity_of_botulinum_toxin_type_B_BoNT_B__Main_Pathway	KEGG_Systemic_lupus_erythematosus_Main_Pathway	NA	NA	NA	NA	NA	NA	NA	NA	NA	NA	NA	NA	NA
reactome_Toxicity_of_botulinum_toxin_type_G_BoNT_G__Main_Pathway	KEGG_Thyroid_hormone_synthesis_Main_Pathway	NA	NA	NA	NA	NA	NA	NA	NA	NA	NA	NA	NA	NA
reactome_TRAIL_signaling_Main_Pathway	KEGG_Type_I_diabetes_mellitus_Main_Pathway	NA	NA	NA	NA	NA	NA	NA	NA	NA	NA	NA	NA	NA
reactome_Transport_and_synthesis_of_PAPS_Main_Pathway	KEGG_Wnt_signaling_Main_Pathway	NA	NA	NA	NA	NA	NA	NA	NA	NA	NA	NA	NA	NA
reactome_Transport_of_inorganic_cations_anions_and_amino_acids_oligopeptides_Main_Pathway	MAPK_Signaling_Pathway	NA	NA	NA	NA	NA	NA	NA	NA	NA	NA	NA	NA	NA
reactome_VEGF_binds_to_VEGFR_leading_to_receptor_dimerization_Main_Pathway	MAPK_Signaling_Pathway_Cell_Motility_Inflammation_Apoptosis_Osmoregulation	NA	NA	NA	NA	NA	NA	NA	NA	NA	NA	NA	NA	NA
TRAF_Pathway_Direct_Antimicrobial_Response_and_Cell-Mediated_Immunity_and_Apoptosis_of_Host_Cell	MAPK_Signaling_Pathway_Gene_Expression_Cell_Proliferation_Cell_Survival_Tumorigenesis_Differentiation_Development_via_PXN_CREB3_RPS6KA5_RPS6KA6	NA	NA	NA	NA	NA	NA	NA	NA	NA	NA	NA	NA	NA
NA	Mitochondrial_Apoptosis_Pathway_Apoptosis	NA	NA	NA	NA	NA	NA	NA	NA	NA	NA	NA	NA	NA
NA	Mitochondrial_Apoptosis_Pathway_DNA_Fragmentation	NA	NA	NA	NA	NA	NA	NA	NA	NA	NA	NA	NA	NA
NA	mTOR_Pathway	NA	NA	NA	NA	NA	NA	NA	NA	NA	NA	NA	NA	NA
NA	mTOR_Pathway_Lipid_Synthesis	NA	NA	NA	NA	NA	NA	NA	NA	NA	NA	NA	NA	NA
NA	NCI_ALK1_signaling_events_Main_Pathway	NA	NA	NA	NA	NA	NA	NA	NA	NA	NA	NA	NA	NA
NA	NCI_ALK1_signaling_events_Pathway_(endothelial_cell_migration)	NA	NA	NA	NA	NA	NA	NA	NA	NA	NA	NA	NA	NA
NA	NCI_ALK1_signaling_events_Pathway_(endothelial_cell_proliferation)	NA	NA	NA	NA	NA	NA	NA	NA	NA	NA	NA	NA	NA
NA	NCI_ALK1_signaling_events_Pathway_(sprouting_angiogenesis)	NA	NA	NA	NA	NA	NA	NA	NA	NA	NA	NA	NA	NA
NA	NCI_Alpha_synuclein_signaling_Pathway_(neuron_apoptosis)	NA	NA	NA	NA	NA	NA	NA	NA	NA	NA	NA	NA	NA
NA	NCI_Alpha6_beta4_integrin_ligand_interactions_Main_Pathway	NA	NA	NA	NA	NA	NA	NA	NA	NA	NA	NA	NA	NA
NA	NCI_AlphaE_beta7_integrin_cell_surface_interactions_Main_Pathway	NA	NA	NA	NA	NA	NA	NA	NA	NA	NA	NA	NA	NA
NA	NCI_amb2_Integrin_signaling_Main_Pathway	NA	NA	NA	NA	NA	NA	NA	NA	NA	NA	NA	NA	NA
NA	NCI_Angiopoietin_receptor_Tie2_mediated_signaling_Main_Pathway	NA	NA	NA	NA	NA	NA	NA	NA	NA	NA	NA	NA	NA
NA	NCI_Angiopoietin_receptor_Tie2_mediated_signaling_Pathway_(chemokinesis)	NA	NA	NA	NA	NA	NA	NA	NA	NA	NA	NA	NA	NA
NA	NCI_Angiopoietin_receptor_Tie2_mediated_signaling_Pathway_(negative_regulation_of_caspase_activity)	NA	NA	NA	NA	NA	NA	NA	NA	NA	NA	NA	NA	NA
NA	NCI_Arf6_downstream_Pathway_(cortical_actin_cytoskeleton_organization)	NA	NA	NA	NA	NA	NA	NA	NA	NA	NA	NA	NA	NA
NA	NCI_Arf6_downstream_Pathway_(lamellipodium_assembly)	NA	NA	NA	NA	NA	NA	NA	NA	NA	NA	NA	NA	NA
NA	NCI_Arf6_trafficking_events_Pathway_(calcium_ion_dependent_exocytosis)	NA	NA	NA	NA	NA	NA	NA	NA	NA	NA	NA	NA	NA
NA	NCI_Arf6_trafficking_events_Pathway_(endocytosis)	NA	NA	NA	NA	NA	NA	NA	NA	NA	NA	NA	NA	NA
NA	NCI_Arf6_trafficking_events_Pathway_(regulation_of_calcium_dependent_cell_cell_adhesion)	NA	NA	NA	NA	NA	NA	NA	NA	NA	NA	NA	NA	NA
NA	NCI_Beta1_integrin_cell_surface_interactions_Main_Pathway	NA	NA	NA	NA	NA	NA	NA	NA	NA	NA	NA	NA	NA
NA	NCI_Beta2_integrin_cell_surface_interactions_Main_Pathway	NA	NA	NA	NA	NA	NA	NA	NA	NA	NA	NA	NA	NA
NA	NCI_Beta3_integrin_cell_surface_interactions_Main_Pathway	NA	NA	NA	NA	NA	NA	NA	NA	NA	NA	NA	NA	NA
NA	NCI_Beta5_beta6_beta7_and_beta8_integrin_cell_surface_interactions_Main_Pathway	NA	NA	NA	NA	NA	NA	NA	NA	NA	NA	NA	NA	NA
NA	NCI_Caspase_Cascade_in_Apoptosis_Main_Pathway	NA	NA	NA	NA	NA	NA	NA	NA	NA	NA	NA	NA	NA
NA	NCI_Caspase_Cascade_in_Apoptosis_Pathway_(apoptotic_nuclear_changes)	NA	NA	NA	NA	NA	NA	NA	NA	NA	NA	NA	NA	NA
NA	NCI_CD40_CD40L_signaling_Pathway_(B_cell_affinity_maturation)	NA	NA	NA	NA	NA	NA	NA	NA	NA	NA	NA	NA	NA
NA	NCI_CD40_CD40L_signaling_Pathway_(plasma_cell_differentiation)	NA	NA	NA	NA	NA	NA	NA	NA	NA	NA	NA	NA	NA
NA	NCI_CDC42_signaling_events_Pathway_(cell_motility)	NA	NA	NA	NA	NA	NA	NA	NA	NA	NA	NA	NA	NA
NA	NCI_CDC42_signaling_events_Pathway_(cell_proliferation)	NA	NA	NA	NA	NA	NA	NA	NA	NA	NA	NA	NA	NA
NA	NCI_CDC42_signaling_events_Pathway_(cytokinesis)	NA	NA	NA	NA	NA	NA	NA	NA	NA	NA	NA	NA	NA
NA	NCI_CDC42_signaling_events_Pathway_(establishment_of_cell_polarity)	NA	NA	NA	NA	NA	NA	NA	NA	NA	NA	NA	NA	NA
NA	NCI_CDC42_signaling_events_Pathway_(Pathway_positive_regulation_of_NF_kappaB_transcription_factor_activity_via_CDC42)	NA	NA	NA	NA	NA	NA	NA	NA	NA	NA	NA	NA	NA
NA	NCI_Cellular_roles_of_Anthrax_toxin_Main_Pathway	NA	NA	NA	NA	NA	NA	NA	NA	NA	NA	NA	NA	NA
NA	NCI_Cellular_roles_of_Anthrax_toxin_Pathway_(apoptosis)	NA	NA	NA	NA	NA	NA	NA	NA	NA	NA	NA	NA	NA
NA	NCI_Cellular_roles_of_Anthrax_toxin_Pathway_(inflammatory_response)	NA	NA	NA	NA	NA	NA	NA	NA	NA	NA	NA	NA	NA
NA	NCI_Cellular_roles_of_Anthrax_toxin_Pathway_(macrophage_activation)	NA	NA	NA	NA	NA	NA	NA	NA	NA	NA	NA	NA	NA
NA	NCI_Cellular_roles_of_Anthrax_toxin_Pathway_(MAPKKK_cascade)	NA	NA	NA	NA	NA	NA	NA	NA	NA	NA	NA	NA	NA
NA	NCI_Cellular_roles_of_Anthrax_toxin_Pathway_(monocyte_activation)	NA	NA	NA	NA	NA	NA	NA	NA	NA	NA	NA	NA	NA
NA	NCI_Cellular_roles_of_Anthrax_toxin_Pathway_(necrosis)	NA	NA	NA	NA	NA	NA	NA	NA	NA	NA	NA	NA	NA
NA	NCI_Cellular_roles_of_Anthrax_toxin_Pathway_(negative_regulation_of_macrophage_activation)	NA	NA	NA	NA	NA	NA	NA	NA	NA	NA	NA	NA	NA
NA	NCI_Cellular_roles_of_Anthrax_toxin_Pathway_(negative_regulation_of_myeloid_dendritic_cell_antigen_processing_and_presentation)	NA	NA	NA	NA	NA	NA	NA	NA	NA	NA	NA	NA	NA
NA	NCI_Cellular_roles_of_Anthrax_toxin_Pathway_(negative_regulation_of_phagocytosis)	NA	NA	NA	NA	NA	NA	NA	NA	NA	NA	NA	NA	NA
NA	NCI_Cellular_roles_of_Anthrax_toxin_Pathway_(platelet_activation)	NA	NA	NA	NA	NA	NA	NA	NA	NA	NA	NA	NA	NA
NA	NCI_Cellular_roles_of_Anthrax_toxin_Pathway_(regulation_of_endothelial_cell_proliferation)	NA	NA	NA	NA	NA	NA	NA	NA	NA	NA	NA	NA	NA
NA	NCI_Class_I_PI3K_signaling_events_mediated_by_Akt_Main_Pathway	NA	NA	NA	NA	NA	NA	NA	NA	NA	NA	NA	NA	NA
NA	NCI_Class_I_PI3K_signaling_events_mediated_by_Akt_Pathway_(negative_regulation_of_cell_cycle)	NA	NA	NA	NA	NA	NA	NA	NA	NA	NA	NA	NA	NA
NA	NCI_Class_I_PI3K_signaling_events_Pathway_(cell_survival)	NA	NA	NA	NA	NA	NA	NA	NA	NA	NA	NA	NA	NA
NA	NCI_Coregulation_of_Androgen_receptor_activity_Main_Pathway	NA	NA	NA	NA	NA	NA	NA	NA	NA	NA	NA	NA	NA
NA	NCI_Coregulation_of_Androgen_receptor_activity_Pathway_(cell_proliferation)	NA	NA	NA	NA	NA	NA	NA	NA	NA	NA	NA	NA	NA
NA	NCI_CXCR3_mediated_signaling_events_Pathway_(cAMP_biosynthetic_process)	NA	NA	NA	NA	NA	NA	NA	NA	NA	NA	NA	NA	NA
NA	NCI_CXCR3_mediated_signaling_events_Pathway_(regulation_of_stress_fiber_assembly)	NA	NA	NA	NA	NA	NA	NA	NA	NA	NA	NA	NA	NA
NA	NCI_E_cadherin_signaling_in_keratinocytes_Main_Pathway	NA	NA	NA	NA	NA	NA	NA	NA	NA	NA	NA	NA	NA
NA	NCI_E_cadherin_signaling_in_keratinocytes_Pathway_(actin_cable_formation)	NA	NA	NA	NA	NA	NA	NA	NA	NA	NA	NA	NA	NA
NA	NCI_E_cadherin_signaling_in_keratinocytes_Pathway_(adherens_junction_organization)	NA	NA	NA	NA	NA	NA	NA	NA	NA	NA	NA	NA	NA
NA	NCI_E_cadherin_signaling_in_keratinocytes_Pathway_(apoptosis)	NA	NA	NA	NA	NA	NA	NA	NA	NA	NA	NA	NA	NA
NA	NCI_E_cadherin_signaling_in_keratinocytes_Pathway_(establishment_of_polarity_of_embryonic_epithelium)	NA	NA	NA	NA	NA	NA	NA	NA	NA	NA	NA	NA	NA
NA	NCI_E_cadherin_signaling_in_keratinocytes_Pathway_(keratinocyte_differentiation)	NA	NA	NA	NA	NA	NA	NA	NA	NA	NA	NA	NA	NA
NA	NCI_E_cadherin_signaling_in_the_nascent_adherens_junction_Main_Pathway	NA	NA	NA	NA	NA	NA	NA	NA	NA	NA	NA	NA	NA
NA	NCI_E_cadherin_signaling_in_the_nascent_adherens_junction_Pathway_(regulation_of_actin_nucleation)	NA	NA	NA	NA	NA	NA	NA	NA	NA	NA	NA	NA	NA
NA	NCI_E2F_transcription_factor_network_Main_Pathway	NA	NA	NA	NA	NA	NA	NA	NA	NA	NA	NA	NA	NA
NA	NCI_Effects_of_Botulinum_toxin_Main_Pathway	NA	NA	NA	NA	NA	NA	NA	NA	NA	NA	NA	NA	NA
NA	NCI_EGFR_dependent_Endothelin_signaling_events_Main_Pathway	NA	NA	NA	NA	NA	NA	NA	NA	NA	NA	NA	NA	NA
NA	NCI_Endogenous_TLR_signaling_Main_Pathway	NA	NA	NA	NA	NA	NA	NA	NA	NA	NA	NA	NA	NA
NA	NCI_Endogenous_TLR_signaling_Pathway_(cell_migration)	NA	NA	NA	NA	NA	NA	NA	NA	NA	NA	NA	NA	NA
NA	NCI_Endogenous_TLR_signaling_Pathway_(regulation_of_apoptosis)	NA	NA	NA	NA	NA	NA	NA	NA	NA	NA	NA	NA	NA
NA	NCI_Endogenous_TLR_signaling_Pathway_(regulation_of_cell_matrix_adhesion)	NA	NA	NA	NA	NA	NA	NA	NA	NA	NA	NA	NA	NA
NA	NCI_Endogenous_TLR_signaling_Pathway_(regulation_of_cell_proliferation)	NA	NA	NA	NA	NA	NA	NA	NA	NA	NA	NA	NA	NA
NA	NCI_Endogenous_TLR_signaling_Pathway_(regulation_of_interleukin_1_beta_production)	NA	NA	NA	NA	NA	NA	NA	NA	NA	NA	NA	NA	NA
NA	NCI_Endogenous_TLR_signaling_Pathway_(respiratory_burst_involved_in_inflammatory_response)	NA	NA	NA	NA	NA	NA	NA	NA	NA	NA	NA	NA	NA
NA	NCI_Endothelins_Main_Pathway	NA	NA	NA	NA	NA	NA	NA	NA	NA	NA	NA	NA	NA
NA	NCI_Endothelins_Pathway_(cAMP_biosynthetic_process)	NA	NA	NA	NA	NA	NA	NA	NA	NA	NA	NA	NA	NA
NA	NCI_Endothelins_Pathway_(positive_regulation_of_muscle_contraction)	NA	NA	NA	NA	NA	NA	NA	NA	NA	NA	NA	NA	NA
NA	NCI_EPHA_forward_signaling_Pathway_(proteasomal_ubiquitin_dependent_protein_catabolic_process)	NA	NA	NA	NA	NA	NA	NA	NA	NA	NA	NA	NA	NA
NA	NCI_EPHA2_forward_signaling_Main_Pathway	NA	NA	NA	NA	NA	NA	NA	NA	NA	NA	NA	NA	NA
NA	NCI_Ephrin_A_reverse_signaling_Main_Pathway	NA	NA	NA	NA	NA	NA	NA	NA	NA	NA	NA	NA	NA
NA	NCI_Ephrin_A_reverse_signaling_Pathway_(beta_integrin_mediated_adhesion)	NA	NA	NA	NA	NA	NA	NA	NA	NA	NA	NA	NA	NA
NA	NCI_Ephrin_A_reverse_signaling_Pathway_(MAPKKK_cascade)	NA	NA	NA	NA	NA	NA	NA	NA	NA	NA	NA	NA	NA
NA	NCI_Ephrin_A_reverse_signaling_Pathway_(neuron_projection_morphogenesis)	NA	NA	NA	NA	NA	NA	NA	NA	NA	NA	NA	NA	NA
NA	NCI_EPO_signaling_Pathway_(cell_proliferation)	NA	NA	NA	NA	NA	NA	NA	NA	NA	NA	NA	NA	NA
NA	NCI_ErbB_receptor_signaling_network_Main_Pathway	NA	NA	NA	NA	NA	NA	NA	NA	NA	NA	NA	NA	NA
NA	NCI_ErbB1_downstream_signaling_Pathway_(cytoskeleton_organization)	NA	NA	NA	NA	NA	NA	NA	NA	NA	NA	NA	NA	NA
NA	NCI_ErbB4_signaling_events_Main_Pathway	NA	NA	NA	NA	NA	NA	NA	NA	NA	NA	NA	NA	NA
NA	NCI_ErbB4_signaling_events_Pathway_(apoptosis)	NA	NA	NA	NA	NA	NA	NA	NA	NA	NA	NA	NA	NA
NA	NCI_ErbB4_signaling_events_Pathway_(axon_guidance)	NA	NA	NA	NA	NA	NA	NA	NA	NA	NA	NA	NA	NA
NA	NCI_ErbB4_signaling_events_Pathway_(cell_proliferation)	NA	NA	NA	NA	NA	NA	NA	NA	NA	NA	NA	NA	NA
NA	NCI_ErbB4_signaling_events_Pathway_(chemotaxis)	NA	NA	NA	NA	NA	NA	NA	NA	NA	NA	NA	NA	NA
NA	NCI_ErbB4_signaling_events_Pathway_(dendrite_morphogenesis)	NA	NA	NA	NA	NA	NA	NA	NA	NA	NA	NA	NA	NA
NA	NCI_ErbB4_signaling_events_Pathway_(epithelial_cell_differentiation)	NA	NA	NA	NA	NA	NA	NA	NA	NA	NA	NA	NA	NA
NA	NCI_ErbB4_signaling_events_Pathway_(glial_cell_differentiation)	NA	NA	NA	NA	NA	NA	NA	NA	NA	NA	NA	NA	NA
NA	NCI_ErbB4_signaling_events_Pathway_(heart_development)	NA	NA	NA	NA	NA	NA	NA	NA	NA	NA	NA	NA	NA
NA	NCI_ErbB4_signaling_events_Pathway_(neural_crest_cell_migration)	NA	NA	NA	NA	NA	NA	NA	NA	NA	NA	NA	NA	NA
NA	NCI_FAS_CD95_signaling_Main_Pathway	NA	NA	NA	NA	NA	NA	NA	NA	NA	NA	NA	NA	NA
NA	NCI_FAS_CD95_signaling_Pathway_(necroptosis)	NA	NA	NA	NA	NA	NA	NA	NA	NA	NA	NA	NA	NA
NA	NCI_FAS_CD95_signaling_Pathway_(neuron_projection_development)	NA	NA	NA	NA	NA	NA	NA	NA	NA	NA	NA	NA	NA
NA	NCI_Glypican_1_network_Main_Pathway	NA	NA	NA	NA	NA	NA	NA	NA	NA	NA	NA	NA	NA
NA	NCI_Glypican_1_network_Pathway_(BMP_signaling_pathway)	NA	NA	NA	NA	NA	NA	NA	NA	NA	NA	NA	NA	NA
NA	NCI_Glypican_1_network_Pathway_(cell_growth)	NA	NA	NA	NA	NA	NA	NA	NA	NA	NA	NA	NA	NA
NA	NCI_Glypican_1_network_Pathway_(fibroblast_growth_factor_receptor_signaling_pathway)	NA	NA	NA	NA	NA	NA	NA	NA	NA	NA	NA	NA	NA
NA	NCI_IFN_gamma_Main_Pathway	NA	NA	NA	NA	NA	NA	NA	NA	NA	NA	NA	NA	NA
NA	NCI_IFN_gamma_Pathway_(Antibacterial_Response)	NA	NA	NA	NA	NA	NA	NA	NA	NA	NA	NA	NA	NA
NA	NCI_IFN_gamma_Pathway_(antigen_processing_and_presentation_of_peptide_antigen_via_MHC_class_I)	NA	NA	NA	NA	NA	NA	NA	NA	NA	NA	NA	NA	NA
NA	NCI_IFN_gamma_Pathway_(antigen_processing_and_presentation_of_peptide_antigen_via_MHC_class_II)	NA	NA	NA	NA	NA	NA	NA	NA	NA	NA	NA	NA	NA
NA	NCI_IFN_gamma_Pathway_(Antiviral_Response)	NA	NA	NA	NA	NA	NA	NA	NA	NA	NA	NA	NA	NA
NA	NCI_IFN_gamma_Pathway_(apoptosis)	NA	NA	NA	NA	NA	NA	NA	NA	NA	NA	NA	NA	NA
NA	NCI_IFN_gamma_Pathway_(Immunoregulation)	NA	NA	NA	NA	NA	NA	NA	NA	NA	NA	NA	NA	NA
NA	NCI_IFN_gamma_Pathway_(negative_regulation_of_cell_growth)	NA	NA	NA	NA	NA	NA	NA	NA	NA	NA	NA	NA	NA
NA	NCI_IGF1_Pathway_(positive_regulation_of_MAPKKK_cascade)	NA	NA	NA	NA	NA	NA	NA	NA	NA	NA	NA	NA	NA
NA	NCI_IL12_signaling_mediated_by_STAT4_Main_Pathway	NA	NA	NA	NA	NA	NA	NA	NA	NA	NA	NA	NA	NA
NA	NCI_IL12_signaling_mediated_by_STAT4_Pathway_(natural_killer_cell_mediated_cytotoxicity)	NA	NA	NA	NA	NA	NA	NA	NA	NA	NA	NA	NA	NA
NA	NCI_IL12_signaling_mediated_by_STAT4_Pathway_(T_helper_1_cell_differentiation)	NA	NA	NA	NA	NA	NA	NA	NA	NA	NA	NA	NA	NA
NA	NCI_IL12_signaling_mediated_by_STAT4_Pathway_(T_helper_2_cell_differentiation)	NA	NA	NA	NA	NA	NA	NA	NA	NA	NA	NA	NA	NA
NA	NCI_IL27_mediated_signaling_events_Main_Pathway	NA	NA	NA	NA	NA	NA	NA	NA	NA	NA	NA	NA	NA
NA	NCI_IL27_mediated_signaling_events_Pathway_(cytokine_production_during_immune_response)	NA	NA	NA	NA	NA	NA	NA	NA	NA	NA	NA	NA	NA
NA	NCI_IL27_mediated_signaling_events_Pathway_(MAPKKK_cascade)	NA	NA	NA	NA	NA	NA	NA	NA	NA	NA	NA	NA	NA
NA	NCI_IL27_mediated_signaling_events_Pathway_(mast_cell_activation)	NA	NA	NA	NA	NA	NA	NA	NA	NA	NA	NA	NA	NA
NA	NCI_IL27_mediated_signaling_events_Pathway_(positive_regulation_of_mast_cell_cytokine_production)	NA	NA	NA	NA	NA	NA	NA	NA	NA	NA	NA	NA	NA
NA	NCI_IL27_mediated_signaling_events_Pathway_(positive_regulation_of_T_cell_mediated_cytotoxicity)	NA	NA	NA	NA	NA	NA	NA	NA	NA	NA	NA	NA	NA
NA	NCI_IL27_mediated_signaling_events_Pathway_(T_cell_proliferation)	NA	NA	NA	NA	NA	NA	NA	NA	NA	NA	NA	NA	NA
NA	NCI_IL27_mediated_signaling_events_Pathway_(T_cell_proliferation_during_immune_response)	NA	NA	NA	NA	NA	NA	NA	NA	NA	NA	NA	NA	NA
NA	NCI_IL27_mediated_signaling_events_Pathway_(T_helper_2_cell_differentiation)	NA	NA	NA	NA	NA	NA	NA	NA	NA	NA	NA	NA	NA
NA	NCI_IL5_mediated_signaling_events_Main_Pathway	NA	NA	NA	NA	NA	NA	NA	NA	NA	NA	NA	NA	NA
NA	NCI_IL5_mediated_signaling_events_Pathway_(proteasomal_ubiquitin_dependent_protein_catabolic_process)	NA	NA	NA	NA	NA	NA	NA	NA	NA	NA	NA	NA	NA
NA	NCI_IL5_mediated_signaling_events_Pathway_(regulation_of_isotype_switching_to_IgG_isotypes)	NA	NA	NA	NA	NA	NA	NA	NA	NA	NA	NA	NA	NA
NA	NCI_IL6_mediated_signaling_events_Pathway_(cell_cycle_arrest)	NA	NA	NA	NA	NA	NA	NA	NA	NA	NA	NA	NA	NA
NA	NCI_IL6_mediated_signaling_events_Pathway_(cell_survival)	NA	NA	NA	NA	NA	NA	NA	NA	NA	NA	NA	NA	NA
NA	NCI_IL6_mediated_signaling_events_Pathway_(macrophage_differentiation)	NA	NA	NA	NA	NA	NA	NA	NA	NA	NA	NA	NA	NA
NA	NCI_Insulin_mediated_glucose_transport_Main_Pathway	NA	NA	NA	NA	NA	NA	NA	NA	NA	NA	NA	NA	NA
NA	NCI_Insulin_Pathway_Pathway_(negative_regulation_of_MAPKKK_cascade)	NA	NA	NA	NA	NA	NA	NA	NA	NA	NA	NA	NA	NA
NA	NCI_Integrin_linked_kinase_signaling_Main_Pathway	NA	NA	NA	NA	NA	NA	NA	NA	NA	NA	NA	NA	NA
NA	NCI_Integrins_in_angiogenesis_Main_Pathway	NA	NA	NA	NA	NA	NA	NA	NA	NA	NA	NA	NA	NA
NA	NCI_Integrins_in_angiogenesis_Pathway_(angiogenesis)	NA	NA	NA	NA	NA	NA	NA	NA	NA	NA	NA	NA	NA
NA	NCI_Internalization_of_ErbB1_Main_Pathway	NA	NA	NA	NA	NA	NA	NA	NA	NA	NA	NA	NA	NA
NA	NCI_Lissencephaly_gene_LIS1_in_neuronal_migration_and_development_Pathway_(microtubule_based_movement)	NA	NA	NA	NA	NA	NA	NA	NA	NA	NA	NA	NA	NA
NA	NCI_N_cadherin_signaling_events_Main_Pathway	NA	NA	NA	NA	NA	NA	NA	NA	NA	NA	NA	NA	NA
NA	NCI_N_cadherin_signaling_events_Pathway_(actin_filament_polymerization)	NA	NA	NA	NA	NA	NA	NA	NA	NA	NA	NA	NA	NA
NA	NCI_N_cadherin_signaling_events_Pathway_(regulation_of_cell_cell_adhesion)	NA	NA	NA	NA	NA	NA	NA	NA	NA	NA	NA	NA	NA
NA	NCI_N_cadherin_signaling_events_Pathway_(regulation_of_synapse_organization)	NA	NA	NA	NA	NA	NA	NA	NA	NA	NA	NA	NA	NA
NA	NCI_Neurotrophic_factor_mediated_Trk_receptor_signaling_Pathway_(axon_guidance)	NA	NA	NA	NA	NA	NA	NA	NA	NA	NA	NA	NA	NA
NA	NCI_Neurotrophic_factor_mediated_Trk_receptor_signaling_Pathway_(MAPKKK_cascade)	NA	NA	NA	NA	NA	NA	NA	NA	NA	NA	NA	NA	NA
NA	NCI_Nongenotropic_Androgen_signaling_Pathway_(actin_cytoskeleton_reorganization)	NA	NA	NA	NA	NA	NA	NA	NA	NA	NA	NA	NA	NA
NA	NCI_Notch_mediated_HES_HEY_network_Pathway_(Pathway_degradation_of_HEY1)	NA	NA	NA	NA	NA	NA	NA	NA	NA	NA	NA	NA	NA
NA	NCI_Notch_signaling_Main_Pathway	NA	NA	NA	NA	NA	NA	NA	NA	NA	NA	NA	NA	NA
NA	NCI_Notch_signaling_Pathway_(Bergmann_glial_cell_differentiation)	NA	NA	NA	NA	NA	NA	NA	NA	NA	NA	NA	NA	NA
NA	NCI_Notch_signaling_Pathway_(oligodendrocyte_development)	NA	NA	NA	NA	NA	NA	NA	NA	NA	NA	NA	NA	NA
NA	NCI_Osteopontin_mediated_events_Main_Pathway	NA	NA	NA	NA	NA	NA	NA	NA	NA	NA	NA	NA	NA
NA	NCI_Osteopontin_mediated_events_Pathway_(bone_resorption)	NA	NA	NA	NA	NA	NA	NA	NA	NA	NA	NA	NA	NA
NA	NCI_Osteopontin_mediated_events_Pathway_(ruffle_organization)	NA	NA	NA	NA	NA	NA	NA	NA	NA	NA	NA	NA	NA
NA	NCI_p38_signaling_mediated_by_MAPKAP_kinases_Main_Pathway	NA	NA	NA	NA	NA	NA	NA	NA	NA	NA	NA	NA	NA
NA	NCI_p38_signaling_mediated_by_MAPKAP_kinases_Pathway_(regulation_of_mRNA_stability)	NA	NA	NA	NA	NA	NA	NA	NA	NA	NA	NA	NA	NA
NA	NCI_p53_Main_Pathway	NA	NA	NA	NA	NA	NA	NA	NA	NA	NA	NA	NA	NA
NA	NCI_p53_Pathway_(apoptosis)	NA	NA	NA	NA	NA	NA	NA	NA	NA	NA	NA	NA	NA
NA	NCI_p53_Pathway_(proteasomal_ubiquitin_dependent_protein_catabolic_process)	NA	NA	NA	NA	NA	NA	NA	NA	NA	NA	NA	NA	NA
NA	NCI_p73_transcription_factor_network_Main_Pathway	NA	NA	NA	NA	NA	NA	NA	NA	NA	NA	NA	NA	NA
NA	NCI_p73_transcription_factor_network_Pathway_(apoptosis)	NA	NA	NA	NA	NA	NA	NA	NA	NA	NA	NA	NA	NA
NA	NCI_Plexin_D1_Signaling_Pathway_(receptor_recycling)	NA	NA	NA	NA	NA	NA	NA	NA	NA	NA	NA	NA	NA
NA	NCI_PLK3_signaling_events_Main_Pathway	NA	NA	NA	NA	NA	NA	NA	NA	NA	NA	NA	NA	NA
NA	NCI_Posttranslational_regulation_of_adherens_junction_stability_and_dissassembly_Main_Pathway	NA	NA	NA	NA	NA	NA	NA	NA	NA	NA	NA	NA	NA
NA	NCI_Regulation_of_Androgen_receptor_activity_Main_Pathway	NA	NA	NA	NA	NA	NA	NA	NA	NA	NA	NA	NA	NA
NA	NCI_Regulation_of_Androgen_receptor_activity_Pathway_(cell_proliferation)	NA	NA	NA	NA	NA	NA	NA	NA	NA	NA	NA	NA	NA
NA	NCI_Regulation_of_CDC42_activity_Main_Pathway	NA	NA	NA	NA	NA	NA	NA	NA	NA	NA	NA	NA	NA
NA	NCI_Regulation_of_p38_alpha_and_p38_beta_Main_Pathway	NA	NA	NA	NA	NA	NA	NA	NA	NA	NA	NA	NA	NA
NA	NCI_Regulation_of_p38_alpha_and_p38_beta_Pathway_(positive_regulation_of_innate_immune_response)	NA	NA	NA	NA	NA	NA	NA	NA	NA	NA	NA	NA	NA
NA	NCI_Regulation_of_RAC1_activity_Main_Pathway	NA	NA	NA	NA	NA	NA	NA	NA	NA	NA	NA	NA	NA
NA	NCI_Regulation_of_RhoA_activity_Main_Pathway	NA	NA	NA	NA	NA	NA	NA	NA	NA	NA	NA	NA	NA
NA	NCI_Regulation_of_Telomerase_Pathway_(cell_cycle)	NA	NA	NA	NA	NA	NA	NA	NA	NA	NA	NA	NA	NA
NA	NCI_Role_of_Calcineurin_dependent_NFAT_signaling_in_lymphocytes_Pathway_(apoptosis)	NA	NA	NA	NA	NA	NA	NA	NA	NA	NA	NA	NA	NA
NA	NCI_S1P1_Pathway_(receptor_internalization)	NA	NA	NA	NA	NA	NA	NA	NA	NA	NA	NA	NA	NA
NA	NCI_SHP2_signaling_Main_Pathway	NA	NA	NA	NA	NA	NA	NA	NA	NA	NA	NA	NA	NA
NA	NCI_Signaling_events_mediated_by_HDAC_Class_III_Main_Pathway	NA	NA	NA	NA	NA	NA	NA	NA	NA	NA	NA	NA	NA
NA	NCI_Signaling_events_mediated_by_HDAC_Class_III_Pathway_(regulation_of_S_phase_of_mitotic_cell_cycle)	NA	NA	NA	NA	NA	NA	NA	NA	NA	NA	NA	NA	NA
NA	NCI_Signaling_events_mediated_by_PRL_Pathway_(cell_motility)	NA	NA	NA	NA	NA	NA	NA	NA	NA	NA	NA	NA	NA
NA	NCI_Signaling_events_mediated_by_PRL_Pathway_(mitosis)	NA	NA	NA	NA	NA	NA	NA	NA	NA	NA	NA	NA	NA
NA	NCI_Signaling_events_mediated_by_Stem_cell_factor_receptor_c_Kit__Main_Pathway	NA	NA	NA	NA	NA	NA	NA	NA	NA	NA	NA	NA	NA
NA	NCI_Signaling_events_mediated_by_Stem_cell_factor_receptor_c_Kit__Pathway_(actin_filament_polymerization)	NA	NA	NA	NA	NA	NA	NA	NA	NA	NA	NA	NA	NA
NA	NCI_Signaling_events_mediated_by_Stem_cell_factor_receptor_c_Kit__Pathway_(cell_migration)	NA	NA	NA	NA	NA	NA	NA	NA	NA	NA	NA	NA	NA
NA	NCI_Signaling_events_mediated_by_Stem_cell_factor_receptor_c_Kit__Pathway_(cell_motility)	NA	NA	NA	NA	NA	NA	NA	NA	NA	NA	NA	NA	NA
NA	NCI_Signaling_events_mediated_by_Stem_cell_factor_receptor_c_Kit__Pathway_(cell_proliferation)	NA	NA	NA	NA	NA	NA	NA	NA	NA	NA	NA	NA	NA
NA	NCI_Signaling_events_mediated_by_Stem_cell_factor_receptor_c_Kit__Pathway_(megakaryocyte_differentiation)	NA	NA	NA	NA	NA	NA	NA	NA	NA	NA	NA	NA	NA
NA	NCI_Signaling_events_mediated_by_Stem_cell_factor_receptor_c_Kit__Pathway_(Pathway_positive_regulation_of_transcription_via_MAPK3)	NA	NA	NA	NA	NA	NA	NA	NA	NA	NA	NA	NA	NA
NA	NCI_Signaling_events_mediated_by_Stem_cell_factor_receptor_c_Kit__Pathway_(positive_regulation_of_cell_proliferation)	NA	NA	NA	NA	NA	NA	NA	NA	NA	NA	NA	NA	NA
NA	NCI_Signaling_events_mediated_by_Stem_cell_factor_receptor_c_Kit__Pathway_(response_to_radiation)	NA	NA	NA	NA	NA	NA	NA	NA	NA	NA	NA	NA	NA
NA	NCI_Signaling_events_mediated_by_VEGFR1_and_VEGFR2_Pathway_(cell_proliferation)	NA	NA	NA	NA	NA	NA	NA	NA	NA	NA	NA	NA	NA
NA	NCI_Signaling_events_mediated_by_VEGFR1_and_VEGFR2_Pathway_(stress_fiber_assembly)	NA	NA	NA	NA	NA	NA	NA	NA	NA	NA	NA	NA	NA
NA	NCI_Signaling_events_regulated_by_Ret_tyrosine_kinase_Main_Pathway	NA	NA	NA	NA	NA	NA	NA	NA	NA	NA	NA	NA	NA
NA	NCI_Signaling_events_regulated_by_Ret_tyrosine_kinase_Pathway_(activation_of_MAPKK_activity)	NA	NA	NA	NA	NA	NA	NA	NA	NA	NA	NA	NA	NA
NA	NCI_Signaling_events_regulated_by_Ret_tyrosine_kinase_Pathway_(lamellipodium_assembly)	NA	NA	NA	NA	NA	NA	NA	NA	NA	NA	NA	NA	NA
NA	NCI_Signaling_events_regulated_by_Ret_tyrosine_kinase_Pathway_(MAPKKK_cascade)	NA	NA	NA	NA	NA	NA	NA	NA	NA	NA	NA	NA	NA
NA	NCI_Signaling_events_regulated_by_Ret_tyrosine_kinase_Pathway_(tube_development)	NA	NA	NA	NA	NA	NA	NA	NA	NA	NA	NA	NA	NA
NA	NCI_Signaling_mediated_by_p38_alpha_and_p38_beta_Main_Pathway	NA	NA	NA	NA	NA	NA	NA	NA	NA	NA	NA	NA	NA
NA	NCI_Stabilization_and_expansion_of_the_E_cadherin_adherens_junction_Pathway_(actin_cytoskeleton_organization)	NA	NA	NA	NA	NA	NA	NA	NA	NA	NA	NA	NA	NA
NA	NCI_Stabilization_and_expansion_of_the_E_cadherin_adherens_junction_Pathway_(cortical_microtubule_organization)	NA	NA	NA	NA	NA	NA	NA	NA	NA	NA	NA	NA	NA
NA	NCI_Stabilization_and_expansion_of_the_E_cadherin_adherens_junction_Pathway_(epithelial_cell_differentiation)	NA	NA	NA	NA	NA	NA	NA	NA	NA	NA	NA	NA	NA
NA	NCI_Stabilization_and_expansion_of_the_E_cadherin_adherens_junction_Pathway_(regulation_of_calcium_dependent_cell_cell_adhesion)	NA	NA	NA	NA	NA	NA	NA	NA	NA	NA	NA	NA	NA
NA	NCI_Stabilization_and_expansion_of_the_E_cadherin_adherens_junction_Pathway_(Wnt_receptor_signaling_pathway)	NA	NA	NA	NA	NA	NA	NA	NA	NA	NA	NA	NA	NA
NA	NCI_Syndecan_1_mediated_signaling_events_Main_Pathway	NA	NA	NA	NA	NA	NA	NA	NA	NA	NA	NA	NA	NA
NA	NCI_Syndecan_1_mediated_signaling_events_Pathway_(homophilic_cell_adhesion)	NA	NA	NA	NA	NA	NA	NA	NA	NA	NA	NA	NA	NA
NA	NCI_Syndecan_1_mediated_signaling_events_Pathway_(positive_regulation_of_cell_migration)	NA	NA	NA	NA	NA	NA	NA	NA	NA	NA	NA	NA	NA
NA	NCI_Syndecan_1_mediated_signaling_events_Pathway_(Tumor_Cell_Invasion)	NA	NA	NA	NA	NA	NA	NA	NA	NA	NA	NA	NA	NA
NA	NCI_Syndecan_2_mediated_signaling_events_Pathway_(dendrite_morphogenesis)	NA	NA	NA	NA	NA	NA	NA	NA	NA	NA	NA	NA	NA
NA	NCI_Syndecan_2_mediated_signaling_events_Pathway_(determination_of_left_right_symmetry)	NA	NA	NA	NA	NA	NA	NA	NA	NA	NA	NA	NA	NA
NA	NCI_Syndecan_3_mediated_signaling_events_Pathway_(limb_bud_formation)	NA	NA	NA	NA	NA	NA	NA	NA	NA	NA	NA	NA	NA
NA	NCI_TGF_beta_receptor_signaling_Main_Pathway	NA	NA	NA	NA	NA	NA	NA	NA	NA	NA	NA	NA	NA
NA	NCI_Thromboxane_A2_receptor_signaling_Pathway_(chemotaxis)	NA	NA	NA	NA	NA	NA	NA	NA	NA	NA	NA	NA	NA
NA	NCI_Thromboxane_A2_receptor_signaling_Pathway_(MAPKKK_cascade)	NA	NA	NA	NA	NA	NA	NA	NA	NA	NA	NA	NA	NA
NA	NCI_Thromboxane_A2_receptor_signaling_Pathway_(muscle_contraction)	NA	NA	NA	NA	NA	NA	NA	NA	NA	NA	NA	NA	NA
NA	NCI_Trk_receptor_signaling_mediated_by_the_MAPK_Pathway_(neuron_projection_morphogenesis)	NA	NA	NA	NA	NA	NA	NA	NA	NA	NA	NA	NA	NA
NA	NCI_Urokinase_type_plasminogen_activator_uPA_and_uPAR_mediated_signaling_Main_Pathway	NA	NA	NA	NA	NA	NA	NA	NA	NA	NA	NA	NA	NA
NA	NCI_Urokinase_type_plasminogen_activator_uPA_and_uPAR_mediated_signaling_Pathway_(cell_proliferation)	NA	NA	NA	NA	NA	NA	NA	NA	NA	NA	NA	NA	NA
NA	NCI_Validated_transcriptional_targets_of_TAp63_isoforms_Pathway_(Metastasis)	NA	NA	NA	NA	NA	NA	NA	NA	NA	NA	NA	NA	NA
NA	NCI_Validated_transcriptional_targets_of_TAp63_isoforms_Pathway_(Pathway_degradation_of_TP63)	NA	NA	NA	NA	NA	NA	NA	NA	NA	NA	NA	NA	NA
NA	NCI_VEGF_and_VEGFR_signaling_network_Main_Pathway	NA	NA	NA	NA	NA	NA	NA	NA	NA	NA	NA	NA	NA
NA	NCI_VEGFR1_specific_signals_Main_Pathway	NA	NA	NA	NA	NA	NA	NA	NA	NA	NA	NA	NA	NA
NA	NCI_VEGFR3_signaling_in_lymphatic_endothelium_Main_Pathway	NA	NA	NA	NA	NA	NA	NA	NA	NA	NA	NA	NA	NA
NA	NCI_VEGFR3_signaling_in_lymphatic_endothelium_Pathway_(cell_proliferation)	NA	NA	NA	NA	NA	NA	NA	NA	NA	NA	NA	NA	NA
NA	NGF_Pathway_Gene_Expression_via_MYC_ELK1_CREB3_NFKB2	NA	NA	NA	NA	NA	NA	NA	NA	NA	NA	NA	NA	NA
NA	Notch_Signaling_Pathway	NA	NA	NA	NA	NA	NA	NA	NA	NA	NA	NA	NA	NA
NA	Notch_Signaling_Pathway_gamma_Secretase	NA	NA	NA	NA	NA	NA	NA	NA	NA	NA	NA	NA	NA
NA	Notch_Signaling_Pathway_Gene_Expression_Chromatin_Remodeling_via_RBPJ	NA	NA	NA	NA	NA	NA	NA	NA	NA	NA	NA	NA	NA
NA	Notch_Signaling_Pathway_Transcription_of_Target_Genes_Hairy_E-SpI_via_RBPJ	NA	NA	NA	NA	NA	NA	NA	NA	NA	NA	NA	NA	NA
NA	p38_Signaling_Pathway	NA	NA	NA	NA	NA	NA	NA	NA	NA	NA	NA	NA	NA
NA	PAK_Pathway	NA	NA	NA	NA	NA	NA	NA	NA	NA	NA	NA	NA	NA
NA	PAK_Pathway_Actin_Organization	NA	NA	NA	NA	NA	NA	NA	NA	NA	NA	NA	NA	NA
NA	PAK_Pathway_Cell_Survival	NA	NA	NA	NA	NA	NA	NA	NA	NA	NA	NA	NA	NA
NA	PAK_Pathway_Lamelliopodia_and_Filopodia_Outgrowth	NA	NA	NA	NA	NA	NA	NA	NA	NA	NA	NA	NA	NA
NA	PTEN_Pathway	NA	NA	NA	NA	NA	NA	NA	NA	NA	NA	NA	NA	NA
NA	PTEN_Pathway_Adhesion_or_Migration	NA	NA	NA	NA	NA	NA	NA	NA	NA	NA	NA	NA	NA
NA	PTEN_Pathway_Proliferation_CyclinA2_Geminin_AuroraA_PLK1	NA	NA	NA	NA	NA	NA	NA	NA	NA	NA	NA	NA	NA
NA	PTEN_Pathway_Senescence_Ets2_p16	NA	NA	NA	NA	NA	NA	NA	NA	NA	NA	NA	NA	NA
NA	Ras_Pathway	NA	NA	NA	NA	NA	NA	NA	NA	NA	NA	NA	NA	NA
NA	Ras_Pathway_Cell-Cell_Junctions	NA	NA	NA	NA	NA	NA	NA	NA	NA	NA	NA	NA	NA
NA	Ras_Pathway_Golgi_Trafficking_and_Vesicle_Formation	NA	NA	NA	NA	NA	NA	NA	NA	NA	NA	NA	NA	NA
NA	Ras_Pathway_Increased_T-cell_Adhesion	NA	NA	NA	NA	NA	NA	NA	NA	NA	NA	NA	NA	NA
NA	reactome_A_third_proteolytic_cleavage_releases_NICD_Main_Pathway	NA	NA	NA	NA	NA	NA	NA	NA	NA	NA	NA	NA	NA
NA	reactome_Abacavir_metabolism_Main_Pathway	NA	NA	NA	NA	NA	NA	NA	NA	NA	NA	NA	NA	NA
NA	reactome_Abacavir_transmembrane_transport_Main_Pathway	NA	NA	NA	NA	NA	NA	NA	NA	NA	NA	NA	NA	NA
NA	reactome_ABCA_transporters_in_lipid_homeostasis_Main_Pathway	NA	NA	NA	NA	NA	NA	NA	NA	NA	NA	NA	NA	NA
NA	reactome_Acetylcholine_Neurotransmitter_Release_Cycle_Main_Pathway	NA	NA	NA	NA	NA	NA	NA	NA	NA	NA	NA	NA	NA
NA	reactome_Activation_of_BAD_and_translocation_to_mitochondria_Main_Pathway	NA	NA	NA	NA	NA	NA	NA	NA	NA	NA	NA	NA	NA
NA	reactome_Activation_of_C3_and_C5_Main_Pathway	NA	NA	NA	NA	NA	NA	NA	NA	NA	NA	NA	NA	NA
NA	reactome_Activation_of_Matrix_Metalloproteinases_Main_Pathway	NA	NA	NA	NA	NA	NA	NA	NA	NA	NA	NA	NA	NA
NA	reactome_Activation_of_RAS_in_B_cells_Main_Pathway	NA	NA	NA	NA	NA	NA	NA	NA	NA	NA	NA	NA	NA
NA	reactome_Acyl_chain_remodeling_of_DAG_and_TAG_Main_Pathway	NA	NA	NA	NA	NA	NA	NA	NA	NA	NA	NA	NA	NA
NA	reactome_Acyl_chain_remodelling_of_PC_Main_Pathway	NA	NA	NA	NA	NA	NA	NA	NA	NA	NA	NA	NA	NA
NA	reactome_Acyl_chain_remodelling_of_PI_Main_Pathway	NA	NA	NA	NA	NA	NA	NA	NA	NA	NA	NA	NA	NA
NA	reactome_Adherens_junctions_interactions_Main_Pathway	NA	NA	NA	NA	NA	NA	NA	NA	NA	NA	NA	NA	NA
NA	reactome_Adrenaline_signalling_through_Alpha_2_adrenergic_receptor_Main_Pathway	NA	NA	NA	NA	NA	NA	NA	NA	NA	NA	NA	NA	NA
NA	reactome_Adrenoceptors_Main_Pathway	NA	NA	NA	NA	NA	NA	NA	NA	NA	NA	NA	NA	NA
NA	reactome_Alternative_complement_activation_Main_Pathway	NA	NA	NA	NA	NA	NA	NA	NA	NA	NA	NA	NA	NA
NA	reactome_Amine_compound_SLC_transporters_Main_Pathway	NA	NA	NA	NA	NA	NA	NA	NA	NA	NA	NA	NA	NA
NA	reactome_Amino_acid_and_oligopeptide_SLC_transporters_Main_Pathway	NA	NA	NA	NA	NA	NA	NA	NA	NA	NA	NA	NA	NA
NA	reactome_Amino_acid_transport_across_the_plasma_membrane_Main_Pathway	NA	NA	NA	NA	NA	NA	NA	NA	NA	NA	NA	NA	NA
NA	reactome_Anchoring_fibril_formation_Main_Pathway	NA	NA	NA	NA	NA	NA	NA	NA	NA	NA	NA	NA	NA
NA	reactome_Androgen_biosynthesis_Main_Pathway	NA	NA	NA	NA	NA	NA	NA	NA	NA	NA	NA	NA	NA
NA	reactome_Antigen_Presentation_Folding_assembly_and_peptide_loading_of_class_I_MHC_Main_Pathway	NA	NA	NA	NA	NA	NA	NA	NA	NA	NA	NA	NA	NA
NA	reactome_Apoptotic_cleavage_of_cell_adhesion_proteins_Main_Pathway	NA	NA	NA	NA	NA	NA	NA	NA	NA	NA	NA	NA	NA
NA	reactome_Arachidonate_production_from_DAG_Main_Pathway	NA	NA	NA	NA	NA	NA	NA	NA	NA	NA	NA	NA	NA
NA	reactome_Asymmetric_localization_of_PCP_proteins_Main_Pathway	NA	NA	NA	NA	NA	NA	NA	NA	NA	NA	NA	NA	NA
NA	reactome_Beta_oxidation_of_very_long_chain_fatty_acids_Main_Pathway	NA	NA	NA	NA	NA	NA	NA	NA	NA	NA	NA	NA	NA
NA	reactome_Bile_salt_and_organic_anion_SLC_transporters_Main_Pathway	NA	NA	NA	NA	NA	NA	NA	NA	NA	NA	NA	NA	NA
NA	reactome_Binding_and_entry_of_HIV_virion_Main_Pathway	NA	NA	NA	NA	NA	NA	NA	NA	NA	NA	NA	NA	NA
NA	reactome_Ca_activated_K_channels_Main_Pathway	NA	NA	NA	NA	NA	NA	NA	NA	NA	NA	NA	NA	NA
NA	reactome_Caspase_mediated_cleavage_of_cytoskeletal_proteins_Main_Pathway	NA	NA	NA	NA	NA	NA	NA	NA	NA	NA	NA	NA	NA
NA	reactome_cGMP_effects_Main_Pathway	NA	NA	NA	NA	NA	NA	NA	NA	NA	NA	NA	NA	NA
NA	reactome_Chondroitin_sulfate_biosynthesis_Main_Pathway	NA	NA	NA	NA	NA	NA	NA	NA	NA	NA	NA	NA	NA
NA	reactome_Circadian_Clock_Main_Pathway	NA	NA	NA	NA	NA	NA	NA	NA	NA	NA	NA	NA	NA
NA	reactome_Class_II_GLUTs_Main_Pathway	NA	NA	NA	NA	NA	NA	NA	NA	NA	NA	NA	NA	NA
NA	reactome_Classical_Kir_channels_Main_Pathway	NA	NA	NA	NA	NA	NA	NA	NA	NA	NA	NA	NA	NA
NA	reactome_Clathrin_derived_vesicle_budding_Main_Pathway	NA	NA	NA	NA	NA	NA	NA	NA	NA	NA	NA	NA	NA
NA	reactome_Collagen_biosynthesis_and_modifying_enzymes_Main_Pathway	NA	NA	NA	NA	NA	NA	NA	NA	NA	NA	NA	NA	NA
NA	reactome_Collagen_degradation_Main_Pathway	NA	NA	NA	NA	NA	NA	NA	NA	NA	NA	NA	NA	NA
NA	reactome_Constitutive_Signaling_by_NOTCH1_t_7_9_NOTCH1_M1580_K2555_Translocation_Mutant_Main_Pathway	NA	NA	NA	NA	NA	NA	NA	NA	NA	NA	NA	NA	NA
NA	reactome_Cross_presentation_of_particulate_exogenous_antigens_phagosomes__Main_Pathway	NA	NA	NA	NA	NA	NA	NA	NA	NA	NA	NA	NA	NA
NA	reactome_Crosslinking_of_collagen_fibrils_Main_Pathway	NA	NA	NA	NA	NA	NA	NA	NA	NA	NA	NA	NA	NA
NA	reactome_CS_DS_degradation_Main_Pathway	NA	NA	NA	NA	NA	NA	NA	NA	NA	NA	NA	NA	NA
NA	reactome_CTLA4_inhibitory_signaling_Main_Pathway	NA	NA	NA	NA	NA	NA	NA	NA	NA	NA	NA	NA	NA
NA	reactome_Cyclin_D_associated_events_in_G1_Main_Pathway	NA	NA	NA	NA	NA	NA	NA	NA	NA	NA	NA	NA	NA
NA	reactome_CYP2E1_reactions_Main_Pathway	NA	NA	NA	NA	NA	NA	NA	NA	NA	NA	NA	NA	NA
NA	reactome_DAG_and_IP3_signaling_Main_Pathway	NA	NA	NA	NA	NA	NA	NA	NA	NA	NA	NA	NA	NA
NA	reactome_Degradation_of_the_extracellular_matrix_Main_Pathway	NA	NA	NA	NA	NA	NA	NA	NA	NA	NA	NA	NA	NA
NA	reactome_Digestion_of_dietary_lipid_Main_Pathway	NA	NA	NA	NA	NA	NA	NA	NA	NA	NA	NA	NA	NA
NA	reactome_Dissolution_of_Fibrin_Clot_Main_Pathway	NA	NA	NA	NA	NA	NA	NA	NA	NA	NA	NA	NA	NA
NA	reactome_Dopamine_Neurotransmitter_Release_Cycle_Main_Pathway	NA	NA	NA	NA	NA	NA	NA	NA	NA	NA	NA	NA	NA
NA	reactome_Dopamine_receptors_Main_Pathway	NA	NA	NA	NA	NA	NA	NA	NA	NA	NA	NA	NA	NA
NA	reactome_Downregulation_of_TGF_beta_receptor_signaling_Main_Pathway	NA	NA	NA	NA	NA	NA	NA	NA	NA	NA	NA	NA	NA
NA	reactome_ECM_proteoglycans_Main_Pathway	NA	NA	NA	NA	NA	NA	NA	NA	NA	NA	NA	NA	NA
NA	reactome_Effects_of_PIP2_hydrolysis_Main_Pathway	NA	NA	NA	NA	NA	NA	NA	NA	NA	NA	NA	NA	NA
NA	reactome_EGFR_interacts_with_phospholipase_C_gamma_Main_Pathway	NA	NA	NA	NA	NA	NA	NA	NA	NA	NA	NA	NA	NA
NA	reactome_EGFR_Transactivation_by_Gastrin_Main_Pathway	NA	NA	NA	NA	NA	NA	NA	NA	NA	NA	NA	NA	NA
NA	reactome_Elastic_fibre_formation_Main_Pathway	NA	NA	NA	NA	NA	NA	NA	NA	NA	NA	NA	NA	NA
NA	reactome_Elevation_of_cytosolic_Ca2_levels_Main_Pathway	NA	NA	NA	NA	NA	NA	NA	NA	NA	NA	NA	NA	NA
NA	reactome_Endosomal_Vacuolar_Main_Pathway	NA	NA	NA	NA	NA	NA	NA	NA	NA	NA	NA	NA	NA
NA	reactome_EPH_ephrin_mediated_repulsion_of_cells_Main_Pathway	NA	NA	NA	NA	NA	NA	NA	NA	NA	NA	NA	NA	NA
NA	reactome_ER_Quality_Control_Compartment_ERQC__Main_Pathway	NA	NA	NA	NA	NA	NA	NA	NA	NA	NA	NA	NA	NA
NA	reactome_ERKs_are_inactivated_Main_Pathway	NA	NA	NA	NA	NA	NA	NA	NA	NA	NA	NA	NA	NA
NA	reactome_Facilitative_Na_independent_glucose_transporters_Main_Pathway	NA	NA	NA	NA	NA	NA	NA	NA	NA	NA	NA	NA	NA
NA	reactome_FasL_CD95L_signaling_Main_Pathway	NA	NA	NA	NA	NA	NA	NA	NA	NA	NA	NA	NA	NA
NA	reactome_FCGR_activation_Main_Pathway	NA	NA	NA	NA	NA	NA	NA	NA	NA	NA	NA	NA	NA
NA	reactome_Fibronectin_matrix_formation_Main_Pathway	NA	NA	NA	NA	NA	NA	NA	NA	NA	NA	NA	NA	NA
NA	reactome_Formation_of_annular_gap_junctions_Main_Pathway	NA	NA	NA	NA	NA	NA	NA	NA	NA	NA	NA	NA	NA
NA	reactome_Formyl_peptide_receptors_bind_formyl_peptides_and_many_other_ligands_Main_Pathway	NA	NA	NA	NA	NA	NA	NA	NA	NA	NA	NA	NA	NA
NA	reactome_GAB1_signalosome_Main_Pathway	NA	NA	NA	NA	NA	NA	NA	NA	NA	NA	NA	NA	NA
NA	reactome_GABA_synthesis_release_reuptake_and_degradation_Main_Pathway	NA	NA	NA	NA	NA	NA	NA	NA	NA	NA	NA	NA	NA
NA	reactome_Gap_junction_assembly_Main_Pathway	NA	NA	NA	NA	NA	NA	NA	NA	NA	NA	NA	NA	NA
NA	reactome_Gap_junction_degradation_Main_Pathway	NA	NA	NA	NA	NA	NA	NA	NA	NA	NA	NA	NA	NA
NA	reactome_Glutamate_Neurotransmitter_Release_Cycle_Main_Pathway	NA	NA	NA	NA	NA	NA	NA	NA	NA	NA	NA	NA	NA
NA	reactome_Glycogen_breakdown_glycogenolysis__Main_Pathway	NA	NA	NA	NA	NA	NA	NA	NA	NA	NA	NA	NA	NA
NA	reactome_Glycogen_synthesis_Main_Pathway	NA	NA	NA	NA	NA	NA	NA	NA	NA	NA	NA	NA	NA
NA	reactome_Glycosphingolipid_metabolism_Main_Pathway	NA	NA	NA	NA	NA	NA	NA	NA	NA	NA	NA	NA	NA
NA	reactome_Growth_hormone_receptor_signaling_Main_Pathway	NA	NA	NA	NA	NA	NA	NA	NA	NA	NA	NA	NA	NA
NA	reactome_Histamine_receptors_Main_Pathway	NA	NA	NA	NA	NA	NA	NA	NA	NA	NA	NA	NA	NA
NA	reactome_Hypusinylation_Main_Pathway	NA	NA	NA	NA	NA	NA	NA	NA	NA	NA	NA	NA	NA
NA	reactome_Initial_triggering_of_complement_Main_Pathway	NA	NA	NA	NA	NA	NA	NA	NA	NA	NA	NA	NA	NA
NA	reactome_Inositol_transporters_Main_Pathway	NA	NA	NA	NA	NA	NA	NA	NA	NA	NA	NA	NA	NA
NA	reactome_Insulin_receptor_recycling_Main_Pathway	NA	NA	NA	NA	NA	NA	NA	NA	NA	NA	NA	NA	NA
NA	reactome_Interaction_With_The_Zona_Pellucida_Main_Pathway	NA	NA	NA	NA	NA	NA	NA	NA	NA	NA	NA	NA	NA
NA	reactome_Interconversion_of_2_oxoglutarate_and_2_hydroxyglutarate_Main_Pathway	NA	NA	NA	NA	NA	NA	NA	NA	NA	NA	NA	NA	NA
NA	reactome_Interconversion_of_polyamines_Main_Pathway	NA	NA	NA	NA	NA	NA	NA	NA	NA	NA	NA	NA	NA
NA	reactome_Interferon_gamma_signaling_Main_Pathway	NA	NA	NA	NA	NA	NA	NA	NA	NA	NA	NA	NA	NA
NA	reactome_Interleukin_6_signaling_Main_Pathway	NA	NA	NA	NA	NA	NA	NA	NA	NA	NA	NA	NA	NA
NA	reactome_Intrinsic_Pathway_Main_Pathway	NA	NA	NA	NA	NA	NA	NA	NA	NA	NA	NA	NA	NA
NA	reactome_Ion_transport_by_P_type_ATPases_Main_Pathway	NA	NA	NA	NA	NA	NA	NA	NA	NA	NA	NA	NA	NA
NA	reactome_IRS_activation_Main_Pathway	NA	NA	NA	NA	NA	NA	NA	NA	NA	NA	NA	NA	NA
NA	reactome_IRS_related_events_triggered_by_IGF1R_Main_Pathway	NA	NA	NA	NA	NA	NA	NA	NA	NA	NA	NA	NA	NA
NA	reactome_ISG15_antiviral_mechanism_Main_Pathway	NA	NA	NA	NA	NA	NA	NA	NA	NA	NA	NA	NA	NA
NA	reactome_Keratan_sulfate_degradation_Main_Pathway	NA	NA	NA	NA	NA	NA	NA	NA	NA	NA	NA	NA	NA
NA	reactome_L1CAM_interactions_Main_Pathway	NA	NA	NA	NA	NA	NA	NA	NA	NA	NA	NA	NA	NA
NA	reactome_Laminin_interactions_Main_Pathway	NA	NA	NA	NA	NA	NA	NA	NA	NA	NA	NA	NA	NA
NA	reactome_Lysosphingolipid_and_LPA_receptors_Main_Pathway	NA	NA	NA	NA	NA	NA	NA	NA	NA	NA	NA	NA	NA
NA	reactome_Metabolism_of_Angiotensinogen_to_Angiotensins_Main_Pathway	NA	NA	NA	NA	NA	NA	NA	NA	NA	NA	NA	NA	NA
NA	reactome_Metal_ion_SLC_transporters_Main_Pathway	NA	NA	NA	NA	NA	NA	NA	NA	NA	NA	NA	NA	NA
NA	reactome_Miscellaneous_substrates_Main_Pathway	NA	NA	NA	NA	NA	NA	NA	NA	NA	NA	NA	NA	NA
NA	reactome_misspliced_LRP5_mutants_have_enhanced_beta_catenin_dependent_signaling_Main_Pathway	NA	NA	NA	NA	NA	NA	NA	NA	NA	NA	NA	NA	NA
NA	reactome_Molecules_associated_with_elastic_fibres_Main_Pathway	NA	NA	NA	NA	NA	NA	NA	NA	NA	NA	NA	NA	NA
NA	reactome_Multifunctional_anion_exchangers_Main_Pathway	NA	NA	NA	NA	NA	NA	NA	NA	NA	NA	NA	NA	NA
NA	reactome_MyD88_cascade_initiated_on_plasma_membrane_Main_Pathway	NA	NA	NA	NA	NA	NA	NA	NA	NA	NA	NA	NA	NA
NA	reactome_MyD88_independent_cascade_Main_Pathway	NA	NA	NA	NA	NA	NA	NA	NA	NA	NA	NA	NA	NA
NA	reactome_N_Glycan_antennae_elongation_Main_Pathway	NA	NA	NA	NA	NA	NA	NA	NA	NA	NA	NA	NA	NA
NA	reactome_N_glycan_trimming_in_the_ER_and_Calnexin_Calreticulin_cycle_Main_Pathway	NA	NA	NA	NA	NA	NA	NA	NA	NA	NA	NA	NA	NA
NA	reactome_Nectin_Necl_trans_heterodimerization_Main_Pathway	NA	NA	NA	NA	NA	NA	NA	NA	NA	NA	NA	NA	NA
NA	reactome_Neurofascin_interactions_Main_Pathway	NA	NA	NA	NA	NA	NA	NA	NA	NA	NA	NA	NA	NA
NA	reactome_NGF_processing_Main_Pathway	NA	NA	NA	NA	NA	NA	NA	NA	NA	NA	NA	NA	NA
NA	reactome_Nicotinate_metabolism_Main_Pathway	NA	NA	NA	NA	NA	NA	NA	NA	NA	NA	NA	NA	NA
NA	reactome_Non_integrin_membrane_ECM_interactions_Main_Pathway	NA	NA	NA	NA	NA	NA	NA	NA	NA	NA	NA	NA	NA
NA	reactome_Norepinephrine_Neurotransmitter_Release_Cycle_Main_Pathway	NA	NA	NA	NA	NA	NA	NA	NA	NA	NA	NA	NA	NA
NA	reactome_NOTCH2_Activation_and_Transmission_of_Signal_to_the_Nucleus_Main_Pathway	NA	NA	NA	NA	NA	NA	NA	NA	NA	NA	NA	NA	NA
NA	reactome_NrCAM_interactions_Main_Pathway	NA	NA	NA	NA	NA	NA	NA	NA	NA	NA	NA	NA	NA
NA	reactome_O_glycosylation_of_TSR_domain_containing_proteins_Main_Pathway	NA	NA	NA	NA	NA	NA	NA	NA	NA	NA	NA	NA	NA
NA	reactome_Oncogene_Induced_Senescence_Main_Pathway	NA	NA	NA	NA	NA	NA	NA	NA	NA	NA	NA	NA	NA
NA	reactome_Organic_anion_transporters_Main_Pathway	NA	NA	NA	NA	NA	NA	NA	NA	NA	NA	NA	NA	NA
NA	reactome_Organic_cation_transport_Main_Pathway	NA	NA	NA	NA	NA	NA	NA	NA	NA	NA	NA	NA	NA
NA	reactome_Oxidative_Stress_Induced_Senescence_Main_Pathway	NA	NA	NA	NA	NA	NA	NA	NA	NA	NA	NA	NA	NA
NA	reactome_Oxygen_dependent_asparagine_hydroxylation_of_Hypoxia_inducible_Factor_Alpha_Main_Pathway	NA	NA	NA	NA	NA	NA	NA	NA	NA	NA	NA	NA	NA
NA	reactome_PECAM1_interactions_Main_Pathway	NA	NA	NA	NA	NA	NA	NA	NA	NA	NA	NA	NA	NA
NA	reactome_Phagosomal_maturation_early_endosomal_stage__Main_Pathway	NA	NA	NA	NA	NA	NA	NA	NA	NA	NA	NA	NA	NA
NA	reactome_PI3K_AKT_activation_Main_Pathway	NA	NA	NA	NA	NA	NA	NA	NA	NA	NA	NA	NA	NA
NA	reactome_PI3K_Cascade_Main_Pathway	NA	NA	NA	NA	NA	NA	NA	NA	NA	NA	NA	NA	NA
NA	reactome_Plasmalogen_biosynthesis_Main_Pathway	NA	NA	NA	NA	NA	NA	NA	NA	NA	NA	NA	NA	NA
NA	reactome_PLC_beta_mediated_events_Main_Pathway	NA	NA	NA	NA	NA	NA	NA	NA	NA	NA	NA	NA	NA
NA	reactome_Pre_NOTCH_Processing_in_Golgi_Main_Pathway	NA	NA	NA	NA	NA	NA	NA	NA	NA	NA	NA	NA	NA
NA	reactome_Pre_NOTCH_Processing_in_the_Endoplasmic_Reticulum_Main_Pathway	NA	NA	NA	NA	NA	NA	NA	NA	NA	NA	NA	NA	NA
NA	reactome_Pregnenolone_biosynthesis_Main_Pathway	NA	NA	NA	NA	NA	NA	NA	NA	NA	NA	NA	NA	NA
NA	reactome_Prolactin_receptor_signaling_Main_Pathway	NA	NA	NA	NA	NA	NA	NA	NA	NA	NA	NA	NA	NA
NA	reactome_Pyruvate_metabolism_Main_Pathway	NA	NA	NA	NA	NA	NA	NA	NA	NA	NA	NA	NA	NA
NA	reactome_Receptor_ligand_binding_initiates_the_second_proteolytic_cleavage_of_Notch_receptor_Main_Pathway	NA	NA	NA	NA	NA	NA	NA	NA	NA	NA	NA	NA	NA
NA	reactome_Recycling_pathway_of_L1_Main_Pathway	NA	NA	NA	NA	NA	NA	NA	NA	NA	NA	NA	NA	NA
NA	reactome_Regulated_proteolysis_of_p75NTR_Main_Pathway	NA	NA	NA	NA	NA	NA	NA	NA	NA	NA	NA	NA	NA
NA	reactome_Regulation_by_c_FLIP_Main_Pathway	NA	NA	NA	NA	NA	NA	NA	NA	NA	NA	NA	NA	NA
NA	reactome_Regulation_of_Complement_cascade_Main_Pathway	NA	NA	NA	NA	NA	NA	NA	NA	NA	NA	NA	NA	NA
NA	reactome_Regulation_of_gene_expression_in_endocrine_committed_NEUROG3_progenitor_cells_Main_Pathway	NA	NA	NA	NA	NA	NA	NA	NA	NA	NA	NA	NA	NA
NA	reactome_Regulation_of_gene_expression_in_late_stage_branching_morphogenesis_pancreatic_bud_precursor_cells_Main_Pathway	NA	NA	NA	NA	NA	NA	NA	NA	NA	NA	NA	NA	NA
NA	reactome_Regulation_of_IFNG_signaling_Main_Pathway	NA	NA	NA	NA	NA	NA	NA	NA	NA	NA	NA	NA	NA
NA	reactome_Regulation_of_IGF_Activity_by_IGFBP_Main_Pathway	NA	NA	NA	NA	NA	NA	NA	NA	NA	NA	NA	NA	NA
NA	reactome_Regulation_of_KIT_signaling_Main_Pathway	NA	NA	NA	NA	NA	NA	NA	NA	NA	NA	NA	NA	NA
NA	reactome_Rhesus_glycoproteins_mediate_ammonium_transport__Main_Pathway	NA	NA	NA	NA	NA	NA	NA	NA	NA	NA	NA	NA	NA
NA	reactome_RIG_I_MDA5_mediated_induction_of_IFN_alpha_beta_pathways_Main_Pathway	NA	NA	NA	NA	NA	NA	NA	NA	NA	NA	NA	NA	NA
NA	reactome_RNA_Polymerase_I_Promoter_Opening_Main_Pathway	NA	NA	NA	NA	NA	NA	NA	NA	NA	NA	NA	NA	NA
NA	reactome_RNF_mutants_show_enhanced_WNT_signaling_and_proliferation_Main_Pathway	NA	NA	NA	NA	NA	NA	NA	NA	NA	NA	NA	NA	NA
NA	reactome_Role_of_LAT2_NTAL_LAB_on_calcium_mobilization_Main_Pathway	NA	NA	NA	NA	NA	NA	NA	NA	NA	NA	NA	NA	NA
NA	reactome_Role_of_phospholipids_in_phagocytosis_Main_Pathway	NA	NA	NA	NA	NA	NA	NA	NA	NA	NA	NA	NA	NA
NA	reactome_Serotonin_Neurotransmitter_Release_Cycle_Main_Pathway	NA	NA	NA	NA	NA	NA	NA	NA	NA	NA	NA	NA	NA
NA	reactome_Serotonin_receptors_Main_Pathway	NA	NA	NA	NA	NA	NA	NA	NA	NA	NA	NA	NA	NA
NA	reactome_SHC_related_events_triggered_by_IGF1R_Main_Pathway	NA	NA	NA	NA	NA	NA	NA	NA	NA	NA	NA	NA	NA
NA	reactome_SHC1_events_in_ERBB2_signaling_Main_Pathway	NA	NA	NA	NA	NA	NA	NA	NA	NA	NA	NA	NA	NA
NA	reactome_SHC1_events_in_ERBB4_signaling_Main_Pathway	NA	NA	NA	NA	NA	NA	NA	NA	NA	NA	NA	NA	NA
NA	reactome_Sialic_acid_metabolism_Main_Pathway	NA	NA	NA	NA	NA	NA	NA	NA	NA	NA	NA	NA	NA
NA	reactome_Signal_attenuation_Main_Pathway	NA	NA	NA	NA	NA	NA	NA	NA	NA	NA	NA	NA	NA
NA	reactome_Signal_transduction_by_L1_Main_Pathway	NA	NA	NA	NA	NA	NA	NA	NA	NA	NA	NA	NA	NA
NA	reactome_Signaling_by_Activin_Main_Pathway	NA	NA	NA	NA	NA	NA	NA	NA	NA	NA	NA	NA	NA
NA	reactome_Signaling_by_EGFR_Main_Pathway	NA	NA	NA	NA	NA	NA	NA	NA	NA	NA	NA	NA	NA
NA	reactome_Signaling_by_ERBB2_Main_Pathway	NA	NA	NA	NA	NA	NA	NA	NA	NA	NA	NA	NA	NA
NA	reactome_Signaling_by_ERBB4_Main_Pathway	NA	NA	NA	NA	NA	NA	NA	NA	NA	NA	NA	NA	NA
NA	reactome_Signaling_by_Leptin_Main_Pathway	NA	NA	NA	NA	NA	NA	NA	NA	NA	NA	NA	NA	NA
NA	reactome_Signaling_by_NOTCH3_Main_Pathway	NA	NA	NA	NA	NA	NA	NA	NA	NA	NA	NA	NA	NA
NA	reactome_Signaling_by_NOTCH4_Main_Pathway	NA	NA	NA	NA	NA	NA	NA	NA	NA	NA	NA	NA	NA
NA	reactome_Signaling_by_SCF_KIT_Main_Pathway	NA	NA	NA	NA	NA	NA	NA	NA	NA	NA	NA	NA	NA
NA	reactome_Signaling_by_Type_1_Insulin_like_Growth_Factor_1_Receptor_IGF1R__Main_Pathway	NA	NA	NA	NA	NA	NA	NA	NA	NA	NA	NA	NA	NA
NA	reactome_Signaling_by_Wnt_Main_Pathway	NA	NA	NA	NA	NA	NA	NA	NA	NA	NA	NA	NA	NA
NA	reactome_Signalling_to_p38_via_RIT_and_RIN_Main_Pathway	NA	NA	NA	NA	NA	NA	NA	NA	NA	NA	NA	NA	NA
NA	reactome_SMAD2_3_MH2_Domain_Mutants_in_Cancer_Main_Pathway	NA	NA	NA	NA	NA	NA	NA	NA	NA	NA	NA	NA	NA
NA	reactome_SMAD2_3_Phosphorylation_Motif_Mutants_in_Cancer_Main_Pathway	NA	NA	NA	NA	NA	NA	NA	NA	NA	NA	NA	NA	NA
NA	reactome_Smooth_Muscle_Contraction_Main_Pathway	NA	NA	NA	NA	NA	NA	NA	NA	NA	NA	NA	NA	NA
NA	reactome_SOS_mediated_signalling_Main_Pathway	NA	NA	NA	NA	NA	NA	NA	NA	NA	NA	NA	NA	NA
NA	reactome_Sperm_Oocyte_Membrane_Binding_Main_Pathway	NA	NA	NA	NA	NA	NA	NA	NA	NA	NA	NA	NA	NA
NA	reactome_Sphingolipid_de_novo_biosynthesis_Main_Pathway	NA	NA	NA	NA	NA	NA	NA	NA	NA	NA	NA	NA	NA
NA	reactome_Stabilization_of_p53_Main_Pathway	NA	NA	NA	NA	NA	NA	NA	NA	NA	NA	NA	NA	NA
NA	reactome_Sulfide_oxidation_to_sulfate_Main_Pathway	NA	NA	NA	NA	NA	NA	NA	NA	NA	NA	NA	NA	NA
NA	reactome_Synthesis_of_Dolichyl_phosphate_Main_Pathway	NA	NA	NA	NA	NA	NA	NA	NA	NA	NA	NA	NA	NA
NA	reactome_Synthesis_of_IP2_IP_and_Ins_in_the_cytosol_Main_Pathway	NA	NA	NA	NA	NA	NA	NA	NA	NA	NA	NA	NA	NA
NA	reactome_Synthesis_of_PC_Main_Pathway	NA	NA	NA	NA	NA	NA	NA	NA	NA	NA	NA	NA	NA
NA	reactome_Synthesis_of_Prostaglandins_PG_and_Thromboxanes_TX__Main_Pathway	NA	NA	NA	NA	NA	NA	NA	NA	NA	NA	NA	NA	NA
NA	reactome_Synthesis_of_UDP_N_acetyl_glucosamine_Main_Pathway	NA	NA	NA	NA	NA	NA	NA	NA	NA	NA	NA	NA	NA
NA	reactome_Terminal_pathway_of_complement_Main_Pathway	NA	NA	NA	NA	NA	NA	NA	NA	NA	NA	NA	NA	NA
NA	reactome_TGF_beta_receptor_signaling_activates_SMADs_Main_Pathway	NA	NA	NA	NA	NA	NA	NA	NA	NA	NA	NA	NA	NA
NA	reactome_TGFBR1_KD_Mutants_in_Cancer_Main_Pathway	NA	NA	NA	NA	NA	NA	NA	NA	NA	NA	NA	NA	NA
NA	reactome_TGFBR2_Kinase_Domain_Mutants_in_Cancer_Main_Pathway	NA	NA	NA	NA	NA	NA	NA	NA	NA	NA	NA	NA	NA
NA	reactome_The_activation_of_arylsulfatases_Main_Pathway	NA	NA	NA	NA	NA	NA	NA	NA	NA	NA	NA	NA	NA
NA	reactome_The_NLRP1_inflammasome_Main_Pathway	NA	NA	NA	NA	NA	NA	NA	NA	NA	NA	NA	NA	NA
NA	reactome_Tie2_Signaling_Main_Pathway	NA	NA	NA	NA	NA	NA	NA	NA	NA	NA	NA	NA	NA
NA	reactome_Toll_Like_Receptor_4_TLR4_Cascade_Main_Pathway	NA	NA	NA	NA	NA	NA	NA	NA	NA	NA	NA	NA	NA
NA	reactome_Toll_Like_Receptor_TLR6_TLR2_Cascade_Main_Pathway	NA	NA	NA	NA	NA	NA	NA	NA	NA	NA	NA	NA	NA
NA	reactome_Toxicity_of_botulinum_toxin_type_B_BoNT_B__Main_Pathway	NA	NA	NA	NA	NA	NA	NA	NA	NA	NA	NA	NA	NA
NA	reactome_Toxicity_of_botulinum_toxin_type_G_BoNT_G__Main_Pathway	NA	NA	NA	NA	NA	NA	NA	NA	NA	NA	NA	NA	NA
NA	reactome_Trafficking_and_processing_of_endosomal_TLR_Main_Pathway	NA	NA	NA	NA	NA	NA	NA	NA	NA	NA	NA	NA	NA
NA	reactome_Trafficking_of_AMPA_receptors_Main_Pathway	NA	NA	NA	NA	NA	NA	NA	NA	NA	NA	NA	NA	NA
NA	reactome_Trafficking_of_GluR2_containing_AMPA_receptors_Main_Pathway	NA	NA	NA	NA	NA	NA	NA	NA	NA	NA	NA	NA	NA
NA	reactome_TRAIL_signaling_Main_Pathway	NA	NA	NA	NA	NA	NA	NA	NA	NA	NA	NA	NA	NA
NA	reactome_Transferrin_endocytosis_and_recycling_Main_Pathway	NA	NA	NA	NA	NA	NA	NA	NA	NA	NA	NA	NA	NA
NA	reactome_Transport_and_synthesis_of_PAPS_Main_Pathway	NA	NA	NA	NA	NA	NA	NA	NA	NA	NA	NA	NA	NA
NA	reactome_Transport_of_glucose_and_other_sugars_bile_salts_and_organic_acids_metal_ions_and_amine_compounds_Main_Pathway	NA	NA	NA	NA	NA	NA	NA	NA	NA	NA	NA	NA	NA
NA	reactome_Transport_of_inorganic_cations_anions_and_amino_acids_oligopeptides_Main_Pathway	NA	NA	NA	NA	NA	NA	NA	NA	NA	NA	NA	NA	NA
NA	reactome_Transport_of_nucleotide_sugars_Main_Pathway	NA	NA	NA	NA	NA	NA	NA	NA	NA	NA	NA	NA	NA
NA	reactome_Transport_of_organic_anions_Main_Pathway	NA	NA	NA	NA	NA	NA	NA	NA	NA	NA	NA	NA	NA
NA	reactome_Type_I_hemidesmosome_assembly_Main_Pathway	NA	NA	NA	NA	NA	NA	NA	NA	NA	NA	NA	NA	NA
NA	reactome_VEGF_binds_to_VEGFR_leading_to_receptor_dimerization_Main_Pathway	NA	NA	NA	NA	NA	NA	NA	NA	NA	NA	NA	NA	NA
NA	reactome_Vitamin_C_ascorbate_metabolism_Main_Pathway	NA	NA	NA	NA	NA	NA	NA	NA	NA	NA	NA	NA	NA
NA	reactome_Vitamin_D_calciferol_metabolism_Main_Pathway	NA	NA	NA	NA	NA	NA	NA	NA	NA	NA	NA	NA	NA
NA	reactome_Vpr_mediated_induction_of_apoptosis_by_mitochondrial_outer_membrane_permeabilization_Main_Pathway	NA	NA	NA	NA	NA	NA	NA	NA	NA	NA	NA	NA	NA
NA	reactome_WNT_ligand_biogenesis_and_trafficking_Main_Pathway	NA	NA	NA	NA	NA	NA	NA	NA	NA	NA	NA	NA	NA
NA	reactome_Xenobiotics_Main_Pathway	NA	NA	NA	NA	NA	NA	NA	NA	NA	NA	NA	NA	NA
NA	reactome_Zinc_influx_into_cells_by_the_SLC39_gene_family_Main_Pathway	NA	NA	NA	NA	NA	NA	NA	NA	NA	NA	NA	NA	NA
NA	STAT3_Pathway	NA	NA	NA	NA	NA	NA	NA	NA	NA	NA	NA	NA	NA
NA	STAT3_Pathway_Growth_Arrest_and_Differentiation	NA	NA	NA	NA	NA	NA	NA	NA	NA	NA	NA	NA	NA
NA	TGF-Beta_Pathway	NA	NA	NA	NA	NA	NA	NA	NA	NA	NA	NA	NA	NA
NA	TGF-Beta_Pathway_Post_Transciptional_G1_Arrest	NA	NA	NA	NA	NA	NA	NA	NA	NA	NA	NA	NA	NA
NA	TRAF_Pathway_Cell_Survival	NA	NA	NA	NA	NA	NA	NA	NA	NA	NA	NA	NA	NA
NA	WNT_Pathway	NA	NA	NA	NA	NA	NA	NA	NA	NA	NA	NA	NA	NA
NA	WNT_Pathway_NFAT_Pathway	NA	NA	NA	NA	NA	NA	NA	NA	NA	NA	NA	NA	NA
NA	WNT_Pathway_PKC_Pathway	NA	NA	NA	NA	NA	NA	NA	NA	NA	NA	NA	NA	NA

## Sheet: GSE59861_24h_GSE55118
X1_sets_GSE55118_middle_vs_young	X1_sets_GSE55118_old_vs_young	X1_sets_GSE59861_24h_2Gy	X1_sets_GSE59861_24h_5cGy	X2_sets_GSE55118_middle_vs_young_GSE55118_old_vs_young	X2_sets_GSE55118_middle_vs_young_GSE59861_24h_2Gy	X2_sets_GSE55118_middle_vs_young_GSE59861_24h_5cGy	X2_sets_GSE55118_old_vs_young_GSE59861_24h_2Gy	X2_sets_GSE55118_old_vs_young_GSE59861_24h_5cGy	X2_sets_GSE59861_24h_2Gy_GSE59861_24h_5cGy	X3_sets_GSE55118_middle_vs_young_GSE55118_old_vs_young_GSE59861_24h_2Gy	X3_sets_GSE55118_middle_vs_young_GSE55118_old_vs_young_GSE59861_24h_5cGy	X3_sets_GSE55118_middle_vs_young_GSE59861_24h_2Gy_GSE59861_24h_5cGy	X3_sets_GSE55118_old_vs_young_GSE59861_24h_2Gy_GSE59861_24h_5cGy	X4_sets_GSE55118_middle_vs_young_GSE55118_old_vs_young_GSE59861_24h_2Gy_GSE59861_24h_5cGy
AHR_Pathway_PS2_Gene_expression_via_ESR1	NCI_CD40_CD40L_signaling_Pathway_(proteasomal_ubiquitin_dependent_protein_catabolic_process)	ATM_Pathway_Cell_Cycle_Checkpoint_Control	ILK_Signaling_Pathway_Induced_Cell_Proliferation	NCI_N_cadherin_signaling_events_Pathway_(adherens_junction_organization)	NA	NA	NA	NCI_Syndecan_2_mediated_signaling_events_Pathway_(positive_regulation_of_cell_cell_adhesion)	KEGG_Basal_cell_carcinoma_Main_Pathway	NA	NA	NA	NA	NA
NCI_Arf6_downstream_Pathway_(liver_development)	NCI_EPHA2_forward_signaling_Main_Pathway	ATM_Pathway_NF-kB_Pathway	KEGG_Basal_cell_carcinoma_Main_Pathway	NCI_RhoA_signaling_Pathway_(Pathway_positive_regulation_of_NF_kappaB_transcription_factor_activity_via_RHOA)	NA	NA	NA	NA	KEGG_Cell_cycle_Main_Pathway	NA	NA	NA	NA	NA
NCI_Arf6_downstream_Pathway_(myoblast_fusion)	NCI_N_cadherin_signaling_events_Pathway_(adherens_junction_organization)	BRCA1_Pathway_E2_Responsive_Genes	KEGG_Cell_cycle_Main_Pathway	NCI_Stabilization_and_expansion_of_the_E_cadherin_adherens_junction_Pathway_(adherens_junction_organization)	NA	NA	NA	NA	KEGG_Mineral_absorption_Main_Pathway	NA	NA	NA	NA	NA
NCI_Arf6_downstream_Pathway_(regulation_of_epithelial_cell_migration)	NCI_PAR1_mediated_thrombin_signaling_events_Pathway_(chemotaxis)	BRCA1_Pathway_G1_S_arrest	KEGG_Mineral_absorption_Main_Pathway	NA	NA	NA	NA	NA	NCI_Arf6_trafficking_events_Pathway_(membrane_fusion)	NA	NA	NA	NA	NA
NCI_Arf6_downstream_Pathway_(substrate_adhesion_dependent_cell_spreading)	NCI_PAR1_mediated_thrombin_signaling_events_Pathway_(Regulation_of_Cell_Shape)	KEGG_Basal_cell_carcinoma_Main_Pathway	NCI_Arf6_trafficking_events_Pathway_(membrane_fusion)	NA	NA	NA	NA	NA	NCI_Lissencephaly_gene_LIS1_in_neuronal_migration_and_development_Pathway_(microtubule_based_movement)	NA	NA	NA	NA	NA
NCI_Arf6_trafficking_events_Pathway_(clathrin_independent_pinocytosis)	NCI_PAR4_mediated_thrombin_signaling_events_Pathway_(platelet_aggregation)	KEGG_Cell_cycle_Main_Pathway	NCI_ATF_2_transcription_factor_network_Main_Pathway	NA	NA	NA	NA	NA	NCI_Presenilin_action_in_Notch_and_Wnt_signaling_Pathway_(apoptosis)	NA	NA	NA	NA	NA
NCI_Arf6_trafficking_events_Pathway_(positive_regulation_of_endocytosis)	NCI_PAR4_mediated_thrombin_signaling_events_Pathway_(Regulation_of_Cell_Shape)	KEGG_Lysine_biosynthesis_Main_Pathway	NCI_Lissencephaly_gene_LIS1_in_neuronal_migration_and_development_Pathway_(microtubule_based_movement)	NA	NA	NA	NA	NA	NCI_Signaling_events_mediated_by_VEGFR1_and_VEGFR2_Pathway_(Pathway_degradation_of_AKAP1)	NA	NA	NA	NA	NA
NCI_Arf6_trafficking_events_Pathway_(receptor_recycling)	NCI_Regulation_of_nuclear_SMAD2_3_signaling_Pathway_(negative_regulation_of_cell_growth)	KEGG_Mineral_absorption_Main_Pathway	NCI_Presenilin_action_in_Notch_and_Wnt_signaling_Pathway_(apoptosis)	NA	NA	NA	NA	NA	reactome_Progressive_trimming_of_alpha_1_2_linked_mannose_residues_from_Man9_8_7GlcNAc2_to_produce_Man5GlcNAc2_Main_Pathway	NA	NA	NA	NA	NA
NCI_LPA_receptor_mediated_events_Pathway_(contractile_ring_contraction_involved_in_cytokinesis)	NCI_RhoA_signaling_Pathway_(Pathway_positive_regulation_of_NF_kappaB_transcription_factor_activity_via_RHOA)	NCI_Alpha_synuclein_signaling_Pathway_(Pathway_negative_regulation_of_transcription_via_SNCA)	NCI_Signaling_events_mediated_by_VEGFR1_and_VEGFR2_Pathway_(Pathway_degradation_of_AKAP1)	NA	NA	NA	NA	NA	reactome_Purine_salvage_Main_Pathway	NA	NA	NA	NA	NA
NCI_N_cadherin_signaling_events_Pathway_(adherens_junction_organization)	NCI_Stabilization_and_expansion_of_the_E_cadherin_adherens_junction_Pathway_(adherens_junction_organization)	NCI_Alpha_synuclein_signaling_Pathway_(Pathway_positive_regulation_of_gene_specific_transcription_via_SNCA)	NCI_Syndecan_2_mediated_signaling_events_Pathway_(positive_regulation_of_cell_cell_adhesion)	NA	NA	NA	NA	NA	NA	NA	NA	NA	NA	NA
NCI_PAR1_mediated_thrombin_signaling_events_Pathway_(focal_adhesion_assembly)	NCI_Syndecan_2_mediated_signaling_events_Pathway_(positive_regulation_of_cell_cell_adhesion)	NCI_Arf6_trafficking_events_Pathway_(membrane_fusion)	reactome_Progressive_trimming_of_alpha_1_2_linked_mannose_residues_from_Man9_8_7GlcNAc2_to_produce_Man5GlcNAc2_Main_Pathway	NA	NA	NA	NA	NA	NA	NA	NA	NA	NA	NA
NCI_PLK2_and_PLK4_events_Main_Pathway	reactome_AMPK_inhibits_chREBP_transcriptional_activation_activity_Main_Pathway	NCI_CDC42_signaling_events_Pathway_(retrograde_vesicle_mediated_transport_Golgi_to_ER)	reactome_Purine_salvage_Main_Pathway	NA	NA	NA	NA	NA	NA	NA	NA	NA	NA	NA
NCI_PLK2_and_PLK4_events_Pathway_(regulation_of_centriole_replication)	reactome_Nonhomologous_End_joining_NHEJ__Main_Pathway	NCI_IL8_and_CXCR1_mediated_signaling_events_Pathway_(chemotaxis)	NA	NA	NA	NA	NA	NA	NA	NA	NA	NA	NA	NA
NCI_RhoA_signaling_Pathway_(actin_cytoskeleton_organization)	NA	NCI_Lissencephaly_gene_LIS1_in_neuronal_migration_and_development_Pathway_(microtubule_based_movement)	NA	NA	NA	NA	NA	NA	NA	NA	NA	NA	NA	NA
NCI_RhoA_signaling_Pathway_(Golgi_organization)	NA	NCI_Presenilin_action_in_Notch_and_Wnt_signaling_Pathway_(apoptosis)	NA	NA	NA	NA	NA	NA	NA	NA	NA	NA	NA	NA
NCI_RhoA_signaling_Pathway_(Pathway_positive_regulation_of_NF_kappaB_transcription_factor_activity_via_RHOA)	NA	NCI_RAC1_signaling_Pathway_(lamellipodium_assembly)	NA	NA	NA	NA	NA	NA	NA	NA	NA	NA	NA	NA
NCI_Stabilization_and_expansion_of_the_E_cadherin_adherens_junction_Pathway_(adherens_junction_organization)	NA	NCI_Signaling_events_mediated_by_VEGFR1_and_VEGFR2_Pathway_(Pathway_degradation_of_AKAP1)	NA	NA	NA	NA	NA	NA	NA	NA	NA	NA	NA	NA
NCI_Syndecan_2_mediated_signaling_events_Pathway_(dendrite_morphogenesis)	NA	NCI_Trk_receptor_signaling_mediated_by_PI3K_and_PLC_gamma_Pathway_(regulation_of_long_term_neuronal_synaptic_plasticity)	NA	NA	NA	NA	NA	NA	NA	NA	NA	NA	NA	NA
NCI_Syndecan_2_mediated_signaling_events_Pathway_(determination_of_left_right_symmetry)	NA	reactome_Progressive_trimming_of_alpha_1_2_linked_mannose_residues_from_Man9_8_7GlcNAc2_to_produce_Man5GlcNAc2_Main_Pathway	NA	NA	NA	NA	NA	NA	NA	NA	NA	NA	NA	NA
reactome_Mitochondrial_transcription_initiation_Main_Pathway	NA	reactome_Purine_salvage_Main_Pathway	NA	NA	NA	NA	NA	NA	NA	NA	NA	NA	NA	NA
reactome_PERK_regulates_gene_expression_Main_Pathway	NA	NA	NA	NA	NA	NA	NA	NA	NA	NA	NA	NA	NA	NA
reactome_Synthesis_of_PIPs_at_the_ER_membrane_Main_Pathway	NA	NA	NA	NA	NA	NA	NA	NA	NA	NA	NA	NA	NA	NA
