# Supplementary material for: Replicative and radiation-induced aging: a comparison of gene expression profiles
Source: Aging (Albany NY). 2019 Apr 19;11(8):2378–87. doi: 10.18632/aging.101921 (PMC6520014; doi:10.18632/aging.101921)
Supplement: Supplemental Table S3 [file aging-11-101921-s003.xlsx]

## Sheet: GSE59861_3h_EMTAB2086
X1_sets_EMTAB2086_70_vs_30	X1_sets_EMTAB2086_80_vs_30	X1_sets_GSE59861_3h_2Gy	X1_sets_GSE59861_3h_5cGy	X2_sets_EMTAB2086_70_vs_30_EMTAB2086_80_vs_30	X2_sets_EMTAB2086_70_vs_30_GSE59861_3h_2Gy	X2_sets_EMTAB2086_70_vs_30_GSE59861_3h_5cGy	X2_sets_EMTAB2086_80_vs_30_GSE59861_3h_2Gy	X2_sets_EMTAB2086_80_vs_30_GSE59861_3h_5cGy	X2_sets_GSE59861_3h_2Gy_GSE59861_3h_5cGy	X3_sets_EMTAB2086_70_vs_30_EMTAB2086_80_vs_30_GSE59861_3h_2Gy	X3_sets_EMTAB2086_70_vs_30_EMTAB2086_80_vs_30_GSE59861_3h_5cGy	X3_sets_EMTAB2086_70_vs_30_GSE59861_3h_2Gy_GSE59861_3h_5cGy	X3_sets_EMTAB2086_80_vs_30_GSE59861_3h_2Gy_GSE59861_3h_5cGy	X4_sets_EMTAB2086_70_vs_30_EMTAB2086_80_vs_30_GSE59861_3h_2Gy_GSE59861_3h_5cGy
Akt_Signaling_Pathway_Cell_Cycle_Progression	AHR_Pathway_CYP1A1_CYP1B1_CYP1A2_AHRR_gene_expression_via_POLR2B	EGF_Pathway_Rab5_Regulation_Pathway	NA	Akt_Signaling_Pathway_Regulation_of_Cyclic_Nucleotide	EGF_Pathway_Rab5_Regulation_Pathway	NA	EGF_Pathway_Rab5_Regulation_Pathway	NA	NA	EGF_Pathway_Rab5_Regulation_Pathway	NA	NA	NA	NA
Akt_Signaling_Pathway_Regulation_of_Cyclic_Nucleotide	Akt_Signaling_Pathway_Acetylation_of_proteins	HIF1Alpha_Pathway_NOS_Pathway	NA	ATM_Pathway_DNA_repair	NCI_Endogenous_TLR_signaling_Pathway_(regulation_of_cell_adhesion)	NA	HIF1Alpha_Pathway_p53_Hypoxia_Pathway	NA	NA	NCI_Endogenous_TLR_signaling_Pathway_(regulation_of_cell_adhesion)	NA	NA	NA	NA
ATM_Pathway_DNA_repair	Akt_Signaling_Pathway_AR_mediated_apoptosis	HIF1Alpha_Pathway_p53_Hypoxia_Pathway	NA	ATM_Pathway_Repair_and_Recombination	NCI_RhoA_signaling_Pathway_(Golgi_organization)	NA	NCI_Endogenous_TLR_signaling_Pathway_(regulation_of_cell_adhesion)	NA	NA	NCI_RhoA_signaling_Pathway_(Golgi_organization)	NA	NA	NA	NA
ATM_Pathway_Repair_and_Recombination	Akt_Signaling_Pathway_Regulation_of_Cyclic_Nucleotide	HIF1Alpha_Pathway_VEGF_Pathway	NA	ATM_Pathway_S-phase_arrest	NA	NA	NCI_FAS_CD95_signaling_Pathway_(cell_cycle)	NA	NA	NA	NA	NA	NA	NA
ATM_Pathway_S-phase_arrest	Akt_Signaling_Pathway_Synaptic_Transmission	KEGG_D_Glutamine_and_D_glutamate_metabolism_Main_Pathway	NA	BRCA1_Pathway	NA	NA	NCI_Hypoxic_and_oxygen_homeostasis_regulation_of_HIF_1_alpha_Main_Pathway	NA	NA	NA	NA	NA	NA	NA
BRCA1_Pathway	ATM_Pathway_Apoptosis_and_Senescence	KEGG_Prion_diseases_Main_Pathway	NA	BRCA1_Pathway_Growth_Promoting_Genes_hTert_S100A7	NA	NA	NCI_RhoA_signaling_Pathway_(Golgi_organization)	NA	NA	NA	NA	NA	NA	NA
BRCA1_Pathway_Growth_Promoting_Genes_hTert_S100A7	ATM_Pathway_DNA_repair	KEGG_Proximal_tubule_bicarbonate_reclamation_Main_Pathway	NA	BRCA1_Pathway_Homologous_Recombination_Repair	NA	NA	reactome_S6K1_signalling_Main_Pathway	NA	NA	NA	NA	NA	NA	NA
BRCA1_Pathway_Homologous_Recombination_Repair	ATM_Pathway_Repair_and_Recombination	NCI_Arf6_trafficking_events_Pathway_(regulation_of_calcium_dependent_cell_cell_adhesion)	NA	BRCA1_Pathway_Mismatch_Repair	NA	NA	NA	NA	NA	NA	NA	NA	NA	NA
BRCA1_Pathway_Mismatch_Repair	ATM_Pathway_S-phase_arrest	NCI_E_cadherin_signaling_in_the_nascent_adherens_junction_Pathway_(regulation_of_calcium_dependent_cell_cell_adhesion)	NA	Cellular_Apoptosis_Pathway_Depolarization	NA	NA	NA	NA	NA	NA	NA	NA	NA	NA
Cellular_Apoptosis_Pathway_Depolarization	ATM_Pathway_S-phase_progression	NCI_Endogenous_TLR_signaling_Pathway_(regulation_of_cell_adhesion)	NA	Cellular_Apoptosis_Pathway_Gene_Expression_BAX_BID_BAK_Ras_Noxa_PUMA_APAF1_Survivin_BCL2_via_TP53	NA	NA	NA	NA	NA	NA	NA	NA	NA	NA
Cellular_Apoptosis_Pathway_Gene_Expression_BAX_BID_BAK_Ras_Noxa_PUMA_APAF1_Survivin_BCL2_via_TP53	BRCA1_Pathway	NCI_FAS_CD95_signaling_Pathway_(cell_cycle)	NA	EGF_Pathway_Rab5_Regulation_Pathway	NA	NA	NA	NA	NA	NA	NA	NA	NA	NA
EGF_Pathway_Rab5_Regulation_Pathway	BRCA1_Pathway_Base_Excission_Repair	NCI_Hypoxic_and_oxygen_homeostasis_regulation_of_HIF_1_alpha_Main_Pathway	NA	IL-2_Pathway_Apoptosis	NA	NA	NA	NA	NA	NA	NA	NA	NA	NA
IL-2_Pathway_Apoptosis	BRCA1_Pathway_Cell_Cycle_Arrest_DNA_Repair_Genes_p21_WAF_CIP1_14-3-3_GADD45	NCI_IFN_gamma_Pathway_(Antibacterial_Response)	NA	Interferon_Pathway_Gene_Expression_via_HIST1H3B_CREB3	NA	NA	NA	NA	NA	NA	NA	NA	NA	NA
Interferon_Pathway_Gene_Expression_via_HIST1H3B_CREB3	BRCA1_Pathway_Chromatin_Remodeling	NCI_IFN_gamma_Pathway_(antigen_processing_and_presentation_of_peptide_antigen_via_MHC_class_I)	NA	IP3_Pathway_Gene_Expression_via_CREB3_NFATC2_MEF2D	NA	NA	NA	NA	NA	NA	NA	NA	NA	NA
IP3_Pathway_Gene_Expression_via_CREB3_NFATC2_MEF2D	BRCA1_Pathway_E2_Responsive_Genes	NCI_IFN_gamma_Pathway_(antigen_processing_and_presentation_of_peptide_antigen_via_MHC_class_II)	NA	KEGG_Basal_cell_carcinoma_Main_Pathway	NA	NA	NA	NA	NA	NA	NA	NA	NA	NA
KEGG_Basal_cell_carcinoma_Main_Pathway	BRCA1_Pathway_G1_S_arrest	NCI_IFN_gamma_Pathway_(Antiviral_Response)	NA	KEGG_Base_excision_repair_Main_Pathway	NA	NA	NA	NA	NA	NA	NA	NA	NA	NA
KEGG_Base_excision_repair_Main_Pathway	BRCA1_Pathway_Growth_Promoting_Genes_hTert_S100A7	NCI_IFN_gamma_Pathway_(apoptosis)	NA	KEGG_Bile_secretion_Main_Pathway	NA	NA	NA	NA	NA	NA	NA	NA	NA	NA
KEGG_Bile_secretion_Main_Pathway	BRCA1_Pathway_Homologous_Recombination_Repair	NCI_IFN_gamma_Pathway_(Immunoregulation)	NA	KEGG_DNA_replication_Main_Pathway	NA	NA	NA	NA	NA	NA	NA	NA	NA	NA
KEGG_DNA_replication_Main_Pathway	BRCA1_Pathway_Mismatch_Repair	NCI_IFN_gamma_Pathway_(negative_regulation_of_cell_growth)	NA	KEGG_Fanconi_anemia_Main_Pathway	NA	NA	NA	NA	NA	NA	NA	NA	NA	NA
KEGG_Fanconi_anemia_Main_Pathway	BRCA1_Pathway_NHEJ_DSB_Repair	NCI_LPA_receptor_mediated_events_Pathway_(contractile_ring_contraction_involved_in_cytokinesis)	NA	KEGG_Fatty_acid_biosynthesis_Main_Pathway	NA	NA	NA	NA	NA	NA	NA	NA	NA	NA
KEGG_Fatty_acid_biosynthesis_Main_Pathway	BRCA1_Pathway_Nucleotide_Excission_Repair	NCI_Posttranslational_regulation_of_adherens_junction_stability_and_dissassembly_Pathway_(axonogenesis)	NA	KEGG_Hedgehog_signaling_Main_Pathway	NA	NA	NA	NA	NA	NA	NA	NA	NA	NA
KEGG_Hedgehog_signaling_Main_Pathway	BRCA1_Pathway_Transciption_Coupled_Repair	NCI_Presenilin_action_in_Notch_and_Wnt_signaling_Main_Pathway	NA	KEGG_Homologous_recombination_Main_Pathway	NA	NA	NA	NA	NA	NA	NA	NA	NA	NA
KEGG_Homologous_recombination_Main_Pathway	Caspase_Cascade_Pathway	NCI_Presenilin_action_in_Notch_and_Wnt_signaling_Pathway_(Pathway_degradation_of_CTNNB1)	NA	KEGG_Lipoic_acid_metabolism_Main_Pathway	NA	NA	NA	NA	NA	NA	NA	NA	NA	NA
KEGG_Inflammatory_bowel_disease_IBD__Main_Pathway	Caspase_Cascade_Pathway_Activated_Tissue_Trans-glutaminase	NCI_RAC1_signaling_Pathway_(positive_regulation_of_Wnt_receptor_signaling_pathway)	NA	KEGG_Mismatch_repair_Main_Pathway	NA	NA	NA	NA	NA	NA	NA	NA	NA	NA
KEGG_Lipoic_acid_metabolism_Main_Pathway	Caspase_Cascade_Pathway_DNA_Fragmentation	NCI_Regulation_of_nuclear_beta_catenin_signaling_and_target_gene_transcription_Main_Pathway	NA	KEGG_Non_homologous_end_joining_Main_Pathway	NA	NA	NA	NA	NA	NA	NA	NA	NA	NA
KEGG_Mismatch_repair_Main_Pathway	Cellular_Apoptosis_Pathway_Depolarization	NCI_RhoA_signaling_Pathway_(actin_cytoskeleton_organization)	NA	KEGG_Nucleotide_excision_repair_Main_Pathway	NA	NA	NA	NA	NA	NA	NA	NA	NA	NA
KEGG_Non_homologous_end_joining_Main_Pathway	Cellular_Apoptosis_Pathway_Gene_Expression_BAX_BID_BAK_Ras_Noxa_PUMA_APAF1_Survivin_BCL2_via_TP53	NCI_RhoA_signaling_Pathway_(Golgi_organization)	NA	KEGG_One_carbon_pool_by_folate_Main_Pathway	NA	NA	NA	NA	NA	NA	NA	NA	NA	NA
KEGG_Nucleotide_excision_repair_Main_Pathway	Chemokine_Pathway_Internalization_Degradation_Recycling	NCI_RhoA_signaling_Pathway_(Pathway_positive_regulation_of_NF_kappaB_transcription_factor_activity_via_RHOA)	NA	KEGG_Oocyte_meiosis_Main_Pathway	NA	NA	NA	NA	NA	NA	NA	NA	NA	NA
KEGG_One_carbon_pool_by_folate_Main_Pathway	Chromatin_Pathway	NCI_Syndecan_2_mediated_signaling_events_Main_Pathway	NA	KEGG_Phenylalanine_metabolism_Main_Pathway	NA	NA	NA	NA	NA	NA	NA	NA	NA	NA
KEGG_Oocyte_meiosis_Main_Pathway	EGF_Pathway_Cell_Survival	NCI_Syndecan_2_mediated_signaling_events_Pathway_(positive_regulation_of_cell_cell_adhesion)	NA	KEGG_Pyrimidine_metabolism_Main_Pathway	NA	NA	NA	NA	NA	NA	NA	NA	NA	NA
KEGG_Phenylalanine_metabolism_Main_Pathway	EGF_Pathway_Rab5_Regulation_Pathway	NCI_TGF_beta_receptor_signaling_Pathway_(JNK_cascade)	NA	KEGG_Tryptophan_metabolism_Main_Pathway	NA	NA	NA	NA	NA	NA	NA	NA	NA	NA
KEGG_Pyrimidine_metabolism_Main_Pathway	ErbB_Family_Pathway	reactome_ATF6_alpha_activates_chaperone_genes_Main_Pathway	NA	KEGG_Ubiquinone_and_other_terpenoid_quinone_biosynthesis_Main_Pathway	NA	NA	NA	NA	NA	NA	NA	NA	NA	NA
KEGG_Sphingolipid_metabolism_Main_Pathway	ErbB_Family_Pathway_Gene_Expression_via_JUN_FOS_ELK1	reactome_ATF6_alpha_activates_chaperones_Main_Pathway	NA	MAPK_Family_Pathway_Chromatin_Remodelling	NA	NA	NA	NA	NA	NA	NA	NA	NA	NA
KEGG_Tryptophan_metabolism_Main_Pathway	ERK_Signaling_Pathway_Cell_Survival	reactome_binding_of_TCF_LEF_CTNNB1_to_target_gene_promoters_Main_Pathway	NA	Mismatch_Repair_in_Eukaryotes_Pathway	NA	NA	NA	NA	NA	NA	NA	NA	NA	NA
KEGG_Ubiquinone_and_other_terpenoid_quinone_biosynthesis_Main_Pathway	ERK_Signaling_Pathway_Gene_Expression_via_CAPN6_TP53_FOS_ATF1_MYC_ELK3_MYLK_ETS1_SRF_HIST1H3B_CREB3_STAT3_NFKB2_HMGN1_ESR2_ELK1_PAX6_JUN	reactome_PERK_regulates_gene_expression_Main_Pathway	NA	NCI_ATM_Pathway_(chromatin_remodeling)	NA	NA	NA	NA	NA	NA	NA	NA	NA	NA
MAPK_Family_Pathway_Chromatin_Remodelling	ERK_Signaling_Pathway_Translation	reactome_S6K1_signalling_Main_Pathway	NA	NCI_ATM_Pathway_(double_strand_break_repair_via_nonhomologous_end_joining)	NA	NA	NA	NA	NA	NA	NA	NA	NA	NA
Mismatch_Repair_in_Eukaryotes_Pathway	Erythropoietin_Pathway	WNT_Pathway_Cytoskeletal_Rearrangement	NA	NCI_ATM_Pathway_(G2_M_transition_checkpoint)	NA	NA	NA	NA	NA	NA	NA	NA	NA	NA
NCI_ATM_Pathway_(chromatin_remodeling)	Erythropoietin_Pathway_Cell_Cycle_Progression	NA	NA	NCI_ATM_Pathway_(Pathway_rRNA_transcription_via_ATM)	NA	NA	NA	NA	NA	NA	NA	NA	NA	NA
NCI_ATM_Pathway_(double_strand_break_repair_via_nonhomologous_end_joining)	Erythropoietin_Pathway_Cell_Survival	NA	NA	NCI_ATR_signaling_Main_Pathway	NA	NA	NA	NA	NA	NA	NA	NA	NA	NA
NCI_ATM_Pathway_(G2_M_transition_checkpoint)	Estrogen_Pathway_Gene_Expression_via_FOS_JUN_ELK1_SP1_POLR2B_CREB3_NFKB2	NA	NA	NCI_ATR_signaling_Pathway_(Pathway_negative_regulation_of_transcription_during_mitosis_via_CHEK1)	NA	NA	NA	NA	NA	NA	NA	NA	NA	NA
NCI_ATM_Pathway_(Pathway_rRNA_transcription_via_ATM)	FLT3_Signaling_Pathway	NA	NA	NCI_ATR_signaling_Pathway_(regulation_of_double_strand_break_repair_via_homologous_recombination)	NA	NA	NA	NA	NA	NA	NA	NA	NA	NA
NCI_ATR_signaling_Main_Pathway	FLT3_Signaling_Pathway_Transcription_via_ELK3_MAPK12_CREB3_STAT2	NA	NA	NCI_ATR_signaling_Pathway_(response_to_G2_M_transition_DNA_damage_checkpoint_signal)	NA	NA	NA	NA	NA	NA	NA	NA	NA	NA
NCI_ATR_signaling_Pathway_(Pathway_negative_regulation_of_transcription_during_mitosis_via_CHEK1)	Glucocorticoid_Receptor_Signaling_Pathway	NA	NA	NCI_Atypical_NF_kappaB_Pathway_(Pathway_degradation_of_NFKB1_NFKBIA)	NA	NA	NA	NA	NA	NA	NA	NA	NA	NA
NCI_ATR_signaling_Pathway_(regulation_of_double_strand_break_repair_via_homologous_recombination)	Glucocorticoid_Receptor_Signaling_Pathway_Cell_Cycle_Progression	NA	NA	NCI_Atypical_NF_kappaB_Pathway_(Pathway_degradation_of_NFKBIA)	NA	NA	NA	NA	NA	NA	NA	NA	NA	NA
NCI_ATR_signaling_Pathway_(response_to_G2_M_transition_DNA_damage_checkpoint_signal)	Glucocorticoid_Receptor_Signaling_Pathway_Gene_Expression_via_CREB3_STAT5B_SLC22A2_POU2F1	NA	NA	NCI_Atypical_NF_kappaB_Pathway_(positive_regulation_of_anti_apoptosis)	NA	NA	NA	NA	NA	NA	NA	NA	NA	NA
NCI_Atypical_NF_kappaB_Pathway_(Pathway_degradation_of_NFKB1_NFKBIA)	Glucocorticoid_Receptor_Signaling_Pathway_Histone_Deacetylation	NA	NA	NCI_Aurora_A_signaling_Pathway_(regulation_of_centrosome_cycle)	NA	NA	NA	NA	NA	NA	NA	NA	NA	NA
NCI_Atypical_NF_kappaB_Pathway_(Pathway_degradation_of_NFKBIA)	Glucocorticoid_Receptor_Signaling_Pathway_Inflammatory_Cytokines	NA	NA	NCI_Aurora_B_signaling_Main_Pathway	NA	NA	NA	NA	NA	NA	NA	NA	NA	NA
NCI_Atypical_NF_kappaB_Pathway_(positive_regulation_of_anti_apoptosis)	GPCR_Pathway	NA	NA	NCI_Aurora_B_signaling_Pathway_(cytokinesis)	NA	NA	NA	NA	NA	NA	NA	NA	NA	NA
NCI_Aurora_A_signaling_Pathway_(regulation_of_centrosome_cycle)	GPCR_Pathway_Gene_Expression_via_JUN_NFKB2_ELK1_SRF_FOS_CREB3	NA	NA	NCI_Aurora_C_signaling_Main_Pathway	NA	NA	NA	NA	NA	NA	NA	NA	NA	NA
NCI_Aurora_B_signaling_Main_Pathway	GSK3_Signaling_Pathway	NA	NA	NCI_BARD1_signaling_events_Main_Pathway	NA	NA	NA	NA	NA	NA	NA	NA	NA	NA
NCI_Aurora_B_signaling_Pathway_(cytokinesis)	GSK3_Signaling_Pathway_Glycogen_Synthesis	NA	NA	NCI_BARD1_signaling_events_Pathway_(DNA_damage_checkpoint)	NA	NA	NA	NA	NA	NA	NA	NA	NA	NA
NCI_Aurora_C_signaling_Main_Pathway	HGF_Pathway	NA	NA	NCI_BARD1_signaling_events_Pathway_(DNA_repair)	NA	NA	NA	NA	NA	NA	NA	NA	NA	NA
NCI_BARD1_signaling_events_Main_Pathway	HGF_Pathway_IP3_Pathway	NA	NA	NCI_BARD1_signaling_events_Pathway_(protein_ubiquitination)	NA	NA	NA	NA	NA	NA	NA	NA	NA	NA
NCI_BARD1_signaling_events_Pathway_(DNA_damage_checkpoint)	HIF1Alpha_Pathway	NA	NA	NCI_Caspase_Cascade_in_Apoptosis_Pathway_(actin_filament_polymerization)	NA	NA	NA	NA	NA	NA	NA	NA	NA	NA
NCI_BARD1_signaling_events_Pathway_(DNA_repair)	HIF1Alpha_Pathway_p53_Hypoxia_Pathway	NA	NA	NCI_Caspase_Cascade_in_Apoptosis_Pathway_(DNA_repair)	NA	NA	NA	NA	NA	NA	NA	NA	NA	NA
NCI_BARD1_signaling_events_Pathway_(protein_ubiquitination)	IGF1R_Signaling_Pathway_Apoptosis	NA	NA	NCI_Caspase_Cascade_in_Apoptosis_Pathway_(positive_regulation_of_apoptosis)	NA	NA	NA	NA	NA	NA	NA	NA	NA	NA
NCI_Caspase_Cascade_in_Apoptosis_Pathway_(actin_filament_polymerization)	IGF1R_Signaling_Pathway_Cell_Proliferation_Diferentiation_and_Apoptosis	NA	NA	NCI_Circadian_rhythm_Main_Pathway	NA	NA	NA	NA	NA	NA	NA	NA	NA	NA
NCI_Caspase_Cascade_in_Apoptosis_Pathway_(DNA_repair)	IGF1R_Signaling_Pathway_Gene_Expression_Proliferation_Growth_Survival_via_NFAT5_CREB3	NA	NA	NCI_Circadian_rhythm_Pathway_(chromatin_modification)	NA	NA	NA	NA	NA	NA	NA	NA	NA	NA
NCI_Caspase_Cascade_in_Apoptosis_Pathway_(positive_regulation_of_apoptosis)	IL-10_Pathway	NA	NA	NCI_Circadian_rhythm_Pathway_(S_phase_of_mitotic_cell_cycle)	NA	NA	NA	NA	NA	NA	NA	NA	NA	NA
NCI_Circadian_rhythm_Main_Pathway	IL-10_Pathway_IL-10_Responsive_Genes_Transcription_of_BCLXL_Cyclin-D1_D2_D3_Pim1_c-Myc_and_P19(INK4D)_via_STAT3	NA	NA	NCI_Class_IB_PI3K_non_lipid_kinase_events_Pathway_(cAMP_biosynthetic_process)	NA	NA	NA	NA	NA	NA	NA	NA	NA	NA
NCI_Circadian_rhythm_Pathway_(chromatin_modification)	IL-10_Pathway_Inflammatory_Cytokine_Genes_Expression_via_STAT3	NA	NA	NCI_DNA_PK_pathway_in_nonhomologous_end_joining_Main_Pathway	NA	NA	NA	NA	NA	NA	NA	NA	NA	NA
NCI_Circadian_rhythm_Pathway_(S_phase_of_mitotic_cell_cycle)	IL-10_Pathway_Translational_Modulation	NA	NA	NCI_DNA_PK_pathway_in_nonhomologous_end_joining_Pathway_(double_strand_break_repair_via_homologous_recombination)	NA	NA	NA	NA	NA	NA	NA	NA	NA	NA
NCI_Class_IB_PI3K_non_lipid_kinase_events_Pathway_(cAMP_biosynthetic_process)	IL-2_Pathway_Apoptosis	NA	NA	NCI_DNA_PK_pathway_in_nonhomologous_end_joining_Pathway_(double_strand_break_repair_via_nonhomologous_end_joining)	NA	NA	NA	NA	NA	NA	NA	NA	NA	NA
NCI_DNA_PK_pathway_in_nonhomologous_end_joining_Main_Pathway	IL-2_Pathway_IL2_Gene_Expression_via_POLR1E_EGR1_HMGA1_ELF1_POU2F1_MYC	NA	NA	NCI_DNA_PK_pathway_in_nonhomologous_end_joining_Pathway_(immunoglobulin_heavy_chain_V_D_J_recombination)	NA	NA	NA	NA	NA	NA	NA	NA	NA	NA
NCI_DNA_PK_pathway_in_nonhomologous_end_joining_Pathway_(double_strand_break_repair_via_homologous_recombination)	ILK_Signaling_Pathway_Epithelial_Mesenchymal_Transition	NA	NA	NCI_DNA_PK_pathway_in_nonhomologous_end_joining_Pathway_(immunoglobulin_light_chain_V_J_recombination)	NA	NA	NA	NA	NA	NA	NA	NA	NA	NA
NCI_DNA_PK_pathway_in_nonhomologous_end_joining_Pathway_(double_strand_break_repair_via_nonhomologous_end_joining)	Interferon_Pathway	NA	NA	NCI_DNA_PK_pathway_in_nonhomologous_end_joining_Pathway_(V_D_J_recombination)	NA	NA	NA	NA	NA	NA	NA	NA	NA	NA
NCI_DNA_PK_pathway_in_nonhomologous_end_joining_Pathway_(immunoglobulin_heavy_chain_V_D_J_recombination)	Interferon_Pathway_Gene_Expression_via_HIST1H3B_CREB3	NA	NA	NCI_Endogenous_TLR_signaling_Pathway_(regulation_of_cell_adhesion)	NA	NA	NA	NA	NA	NA	NA	NA	NA	NA
NCI_DNA_PK_pathway_in_nonhomologous_end_joining_Pathway_(immunoglobulin_light_chain_V_J_recombination)	Interferon_Pathway_Translation	NA	NA	NCI_Fanconi_anemia_Main_Pathway	NA	NA	NA	NA	NA	NA	NA	NA	NA	NA
NCI_DNA_PK_pathway_in_nonhomologous_end_joining_Pathway_(V_D_J_recombination)	IP3_Pathway_Gene_Expression_via_CREB3_NFATC2_MEF2D	NA	NA	NCI_Fanconi_anemia_Pathway_(DNA_repair)	NA	NA	NA	NA	NA	NA	NA	NA	NA	NA
NCI_Effects_of_Botulinum_toxin_Main_Pathway	JAK-STAT_Pathway	NA	NA	NCI_Fanconi_anemia_Pathway_(G1_S_transition_checkpoint)	NA	NA	NA	NA	NA	NA	NA	NA	NA	NA
NCI_Endogenous_TLR_signaling_Pathway_(regulation_of_cell_adhesion)	KEGG_ABC_transporters_Main_Pathway	NA	NA	NCI_Fanconi_anemia_Pathway_(regulation_of_double_strand_break_repair_via_homologous_recombination)	NA	NA	NA	NA	NA	NA	NA	NA	NA	NA
NCI_Fanconi_anemia_Main_Pathway	KEGG_Alanine_aspartate_and_glutamate_metabolism_Main_Pathway	NA	NA	NCI_Fanconi_anemia_Pathway_(Sister_Chromatid_Exchange_Process)	NA	NA	NA	NA	NA	NA	NA	NA	NA	NA
NCI_Fanconi_anemia_Pathway_(DNA_repair)	KEGG_Aldosterone_regulated_sodium_reabsorption_Main_Pathway	NA	NA	NCI_FOXM1_transcription_factor_network_Main_Pathway	NA	NA	NA	NA	NA	NA	NA	NA	NA	NA
NCI_Fanconi_anemia_Pathway_(G1_S_transition_checkpoint)	KEGG_Amphetamine_addiction_Main_Pathway	NA	NA	NCI_Glypican_2_network_Main_Pathway	NA	NA	NA	NA	NA	NA	NA	NA	NA	NA
NCI_Fanconi_anemia_Pathway_(regulation_of_double_strand_break_repair_via_homologous_recombination)	KEGG_Apoptosis_Main_Pathway	NA	NA	NCI_Integrin_linked_kinase_signaling_Pathway_(centrosome_localization)	NA	NA	NA	NA	NA	NA	NA	NA	NA	NA
NCI_Fanconi_anemia_Pathway_(Sister_Chromatid_Exchange_Process)	KEGG_Ascorbate_and_aldarate_metabolism_Main_Pathway	NA	NA	NCI_PDGF_receptor_signaling_network_Main_Pathway	NA	NA	NA	NA	NA	NA	NA	NA	NA	NA
NCI_FGF_signaling_Pathway_(MAPKKK_cascade)	KEGG_Axon_guidance_Main_Pathway	NA	NA	NCI_PDGF_receptor_signaling_network_Pathway_(platelet_derived_growth_factor_receptor_signaling_pathway)	NA	NA	NA	NA	NA	NA	NA	NA	NA	NA
NCI_FOXM1_transcription_factor_network_Main_Pathway	KEGG_Basal_cell_carcinoma_Main_Pathway	NA	NA	NCI_PLK1_signaling_events_Main_Pathway	NA	NA	NA	NA	NA	NA	NA	NA	NA	NA
NCI_Glypican_2_network_Main_Pathway	KEGG_Basal_transcription_factors_Main_Pathway	NA	NA	NCI_PLK1_signaling_events_Pathway_(chromosome_segregation)	NA	NA	NA	NA	NA	NA	NA	NA	NA	NA
NCI_Integrin_linked_kinase_signaling_Pathway_(centrosome_localization)	KEGG_Base_excision_repair_Main_Pathway	NA	NA	NCI_PLK1_signaling_events_Pathway_(G2_M_transition_of_mitotic_cell_cycle)	NA	NA	NA	NA	NA	NA	NA	NA	NA	NA
NCI_PDGF_receptor_signaling_network_Main_Pathway	KEGG_beta_Alanine_metabolism_Main_Pathway	NA	NA	NCI_PLK1_signaling_events_Pathway_(Golgi_organization)	NA	NA	NA	NA	NA	NA	NA	NA	NA	NA
NCI_PDGF_receptor_signaling_network_Pathway_(platelet_derived_growth_factor_receptor_signaling_pathway)	KEGG_Bile_secretion_Main_Pathway	NA	NA	NCI_PLK1_signaling_events_Pathway_(metaphase_plate_congression)	NA	NA	NA	NA	NA	NA	NA	NA	NA	NA
NCI_PLK1_signaling_events_Main_Pathway	KEGG_Biosynthesis_of_unsaturated_fatty_acids_Main_Pathway	NA	NA	NCI_PLK1_signaling_events_Pathway_(microtubule_cytoskeleton_organization)	NA	NA	NA	NA	NA	NA	NA	NA	NA	NA
NCI_PLK1_signaling_events_Pathway_(chromosome_segregation)	KEGG_Calcium_signaling_Main_Pathway	NA	NA	NCI_PLK1_signaling_events_Pathway_(positive_regulation_of_microtubule_depolymerization)	NA	NA	NA	NA	NA	NA	NA	NA	NA	NA
NCI_PLK1_signaling_events_Pathway_(G2_M_transition_of_mitotic_cell_cycle)	KEGG_cAMP_signaling_Main_Pathway	NA	NA	NCI_PLK1_signaling_events_Pathway_(proteasomal_ubiquitin_dependent_protein_catabolic_process)	NA	NA	NA	NA	NA	NA	NA	NA	NA	NA
NCI_PLK1_signaling_events_Pathway_(Golgi_organization)	KEGG_Cardiac_muscle_contraction_Main_Pathway	NA	NA	NCI_PLK1_signaling_events_Pathway_(regulation_of_attachment_of_spindle_microtubules_to_kinetochore)	NA	NA	NA	NA	NA	NA	NA	NA	NA	NA
NCI_PLK1_signaling_events_Pathway_(metaphase_plate_congression)	KEGG_Chagas_disease_American_trypanosomiasis__Main_Pathway	NA	NA	NCI_PLK1_signaling_events_Pathway_(regulation_of_centriole_centriole_cohesion)	NA	NA	NA	NA	NA	NA	NA	NA	NA	NA
NCI_PLK1_signaling_events_Pathway_(microtubule_cytoskeleton_organization)	KEGG_Chemical_carcinogenesis_Main_Pathway	NA	NA	NCI_PLK1_signaling_events_Pathway_(regulation_of_mitotic_centrosome_separation)	NA	NA	NA	NA	NA	NA	NA	NA	NA	NA
NCI_PLK1_signaling_events_Pathway_(positive_regulation_of_microtubule_depolymerization)	KEGG_Choline_metabolism_in_cancer_Main_Pathway	NA	NA	NCI_PLK1_signaling_events_Pathway_(spindle_assembly)	NA	NA	NA	NA	NA	NA	NA	NA	NA	NA
NCI_PLK1_signaling_events_Pathway_(proteasomal_ubiquitin_dependent_protein_catabolic_process)	KEGG_Cyanoamino_acid_metabolism_Main_Pathway	NA	NA	NCI_PLK1_signaling_events_Pathway_(spindle_elongation)	NA	NA	NA	NA	NA	NA	NA	NA	NA	NA
NCI_PLK1_signaling_events_Pathway_(regulation_of_attachment_of_spindle_microtubules_to_kinetochore)	KEGG_Cysteine_and_methionine_metabolism_Main_Pathway	NA	NA	NCI_PLK1_signaling_events_Pathway_(spindle_stabilization)	NA	NA	NA	NA	NA	NA	NA	NA	NA	NA
NCI_PLK1_signaling_events_Pathway_(regulation_of_centriole_centriole_cohesion)	KEGG_Dilated_cardiomyopathy_Main_Pathway	NA	NA	NCI_PLK2_and_PLK4_events_Main_Pathway	NA	NA	NA	NA	NA	NA	NA	NA	NA	NA
NCI_PLK1_signaling_events_Pathway_(regulation_of_mitotic_centrosome_separation)	KEGG_DNA_replication_Main_Pathway	NA	NA	NCI_PLK2_and_PLK4_events_Pathway_(regulation_of_centriole_replication)	NA	NA	NA	NA	NA	NA	NA	NA	NA	NA
NCI_PLK1_signaling_events_Pathway_(spindle_assembly)	KEGG_Drug_metabolism_other_enzymes_Main_Pathway	NA	NA	NCI_RAC1_signaling_Pathway_(neuron_projection_development)	NA	NA	NA	NA	NA	NA	NA	NA	NA	NA
NCI_PLK1_signaling_events_Pathway_(spindle_elongation)	KEGG_Ether_lipid_metabolism_Main_Pathway	NA	NA	NCI_Reelin_signaling_Main_Pathway	NA	NA	NA	NA	NA	NA	NA	NA	NA	NA
NCI_PLK1_signaling_events_Pathway_(spindle_stabilization)	KEGG_Fanconi_anemia_Main_Pathway	NA	NA	NCI_Reelin_signaling_Pathway_(long_term_memory)	NA	NA	NA	NA	NA	NA	NA	NA	NA	NA
NCI_PLK2_and_PLK4_events_Main_Pathway	KEGG_Fatty_acid_biosynthesis_Main_Pathway	NA	NA	NCI_Reelin_signaling_Pathway_(neuron_migration)	NA	NA	NA	NA	NA	NA	NA	NA	NA	NA
NCI_PLK2_and_PLK4_events_Pathway_(regulation_of_centriole_replication)	KEGG_Fatty_acid_degradation_Main_Pathway	NA	NA	NCI_Regulation_of_Androgen_receptor_activity_Pathway_(Pathway_positive_regulation_of_transcription_via_GATA2)	NA	NA	NA	NA	NA	NA	NA	NA	NA	NA
NCI_RAC1_signaling_Pathway_(neuron_projection_development)	KEGG_Focal_adhesion_Main_Pathway	NA	NA	NCI_Regulation_of_retinoblastoma_protein_Main_Pathway	NA	NA	NA	NA	NA	NA	NA	NA	NA	NA
NCI_Reelin_signaling_Main_Pathway	KEGG_Fructose_and_mannose_metabolism_Main_Pathway	NA	NA	NCI_Regulation_of_retinoblastoma_protein_Pathway_(histone_methylation)	NA	NA	NA	NA	NA	NA	NA	NA	NA	NA
NCI_Reelin_signaling_Pathway_(long_term_memory)	KEGG_Galactose_metabolism_Main_Pathway	NA	NA	NCI_RhoA_signaling_Pathway_(Golgi_organization)	NA	NA	NA	NA	NA	NA	NA	NA	NA	NA
NCI_Reelin_signaling_Pathway_(neuron_migration)	KEGG_Gastric_acid_secretion_Main_Pathway	NA	NA	NCI_Signaling_events_mediated_by_HDAC_Class_I_Main_Pathway	NA	NA	NA	NA	NA	NA	NA	NA	NA	NA
NCI_Regulation_of_Androgen_receptor_activity_Pathway_(Pathway_positive_regulation_of_transcription_via_GATA2)	KEGG_Glycerolipid_metabolism_Main_Pathway	NA	NA	NCI_Signaling_events_mediated_by_HDAC_Class_I_Pathway_(histone_deacetylation)	NA	NA	NA	NA	NA	NA	NA	NA	NA	NA
NCI_Regulation_of_retinoblastoma_protein_Main_Pathway	KEGG_Glycerophospholipid_metabolism_Main_Pathway	NA	NA	NCI_Signaling_events_mediated_by_the_Hedgehog_family_Pathway_(determination_of_left_right_symmetry)	NA	NA	NA	NA	NA	NA	NA	NA	NA	NA
NCI_Regulation_of_retinoblastoma_protein_Pathway_(histone_methylation)	KEGG_Glycine_serine_and_threonine_metabolism_Main_Pathway	NA	NA	NCI_Signaling_events_mediated_by_the_Hedgehog_family_Pathway_(heart_development)	NA	NA	NA	NA	NA	NA	NA	NA	NA	NA
NCI_RhoA_signaling_Pathway_(Golgi_organization)	KEGG_Glycosphingolipid_biosynthesis_globo_series_Main_Pathway	NA	NA	NCI_Signaling_events_mediated_by_the_Hedgehog_family_Pathway_(heart_looping)	NA	NA	NA	NA	NA	NA	NA	NA	NA	NA
NCI_Signaling_events_mediated_by_HDAC_Class_I_Main_Pathway	KEGG_Glycosphingolipid_biosynthesis_lacto_and_neolacto_series_Main_Pathway	NA	NA	NCI_Signaling_events_mediated_by_the_Hedgehog_family_Pathway_(somite_specification)	NA	NA	NA	NA	NA	NA	NA	NA	NA	NA
NCI_Signaling_events_mediated_by_HDAC_Class_I_Pathway_(histone_deacetylation)	KEGG_Hedgehog_signaling_Main_Pathway	NA	NA	NCI_Signaling_events_mediated_by_VEGFR1_and_VEGFR2_Pathway_(Pathway_degradation_of_AKAP1)	NA	NA	NA	NA	NA	NA	NA	NA	NA	NA
NCI_Signaling_events_mediated_by_the_Hedgehog_family_Pathway_(determination_of_left_right_symmetry)	KEGG_Homologous_recombination_Main_Pathway	NA	NA	NCI_Signaling_mediated_by_p38_gamma_and_p38_delta_Pathway_(G2_M_transition_checkpoint)	NA	NA	NA	NA	NA	NA	NA	NA	NA	NA
NCI_Signaling_events_mediated_by_the_Hedgehog_family_Pathway_(heart_development)	KEGG_HTLV_I_infection_Main_Pathway	NA	NA	NCI_Syndecan_4_mediated_signaling_events_Main_Pathway	NA	NA	NA	NA	NA	NA	NA	NA	NA	NA
NCI_Signaling_events_mediated_by_the_Hedgehog_family_Pathway_(heart_looping)	KEGG_Hypertrophic_cardiomyopathy_HCM__Main_Pathway	NA	NA	NCI_Trk_receptor_signaling_mediated_by_PI3K_and_PLC_gamma_Pathway_(regulation_of_long_term_neuronal_synaptic_plasticity)	NA	NA	NA	NA	NA	NA	NA	NA	NA	NA
NCI_Signaling_events_mediated_by_the_Hedgehog_family_Pathway_(somite_specification)	KEGG_Leukocyte_transendothelial_migration_Main_Pathway	NA	NA	PTEN_Pathway_DNA_Repair	NA	NA	NA	NA	NA	NA	NA	NA	NA	NA
NCI_Signaling_events_mediated_by_VEGFR1_and_VEGFR2_Pathway_(Pathway_degradation_of_AKAP1)	KEGG_Lipoic_acid_metabolism_Main_Pathway	NA	NA	Ras_Pathway_Receptor_Endocytosis	NA	NA	NA	NA	NA	NA	NA	NA	NA	NA
NCI_Signaling_mediated_by_p38_gamma_and_p38_delta_Pathway_(G2_M_transition_checkpoint)	KEGG_Lysine_biosynthesis_Main_Pathway	NA	NA	reactome_Abnormal_metabolism_in_phenylketonuria_Main_Pathway	NA	NA	NA	NA	NA	NA	NA	NA	NA	NA
NCI_Syndecan_4_mediated_signaling_events_Main_Pathway	KEGG_Melanoma_Main_Pathway	NA	NA	reactome_Activation_of_ATR_in_response_to_replication_stress_Main_Pathway	NA	NA	NA	NA	NA	NA	NA	NA	NA	NA
NCI_Trk_receptor_signaling_mediated_by_PI3K_and_PLC_gamma_Pathway_(regulation_of_long_term_neuronal_synaptic_plasticity)	KEGG_Metabolism_of_xenobiotics_by_cytochrome_P450_Main_Pathway	NA	NA	reactome_Activation_of_DNA_fragmentation_factor_Main_Pathway	NA	NA	NA	NA	NA	NA	NA	NA	NA	NA
PTEN_Pathway_DNA_Repair	KEGG_Mismatch_repair_Main_Pathway	NA	NA	reactome_Activation_of_NIMA_Kinases_NEK9_NEK6_NEK7_Main_Pathway	NA	NA	NA	NA	NA	NA	NA	NA	NA	NA
Ras_Pathway_Receptor_Endocytosis	KEGG_mRNA_surveillance_Main_Pathway	NA	NA	reactome_Activation_of_NOXA_and_translocation_to_mitochondria_Main_Pathway	NA	NA	NA	NA	NA	NA	NA	NA	NA	NA
reactome_Abnormal_metabolism_in_phenylketonuria_Main_Pathway	KEGG_Mucin_type_O_Glycan_biosynthesis_Main_Pathway	NA	NA	reactome_Activation_of_PUMA_and_translocation_to_mitochondria_Main_Pathway	NA	NA	NA	NA	NA	NA	NA	NA	NA	NA
reactome_Activation_of_ATR_in_response_to_replication_stress_Main_Pathway	KEGG_Nitrogen_metabolism_Main_Pathway	NA	NA	reactome_Activation_of_the_pre_replicative_complex_Main_Pathway	NA	NA	NA	NA	NA	NA	NA	NA	NA	NA
reactome_Activation_of_DNA_fragmentation_factor_Main_Pathway	KEGG_Non_homologous_end_joining_Main_Pathway	NA	NA	reactome_Amyloids_Main_Pathway	NA	NA	NA	NA	NA	NA	NA	NA	NA	NA
reactome_Activation_of_NIMA_Kinases_NEK9_NEK6_NEK7_Main_Pathway	KEGG_Nucleotide_excision_repair_Main_Pathway	NA	NA	reactome_APC_C_Cdc20_mediated_degradation_of_Cyclin_B_Main_Pathway	NA	NA	NA	NA	NA	NA	NA	NA	NA	NA
reactome_Activation_of_NOXA_and_translocation_to_mitochondria_Main_Pathway	KEGG_One_carbon_pool_by_folate_Main_Pathway	NA	NA	reactome_APC_C_Cdc20_mediated_degradation_of_mitotic_proteins_Main_Pathway	NA	NA	NA	NA	NA	NA	NA	NA	NA	NA
reactome_Activation_of_PUMA_and_translocation_to_mitochondria_Main_Pathway	KEGG_Oocyte_meiosis_Main_Pathway	NA	NA	reactome_APC_Cdc20_mediated_degradation_of_Nek2A_Main_Pathway	NA	NA	NA	NA	NA	NA	NA	NA	NA	NA
reactome_Activation_of_the_pre_replicative_complex_Main_Pathway	KEGG_Osteoclast_differentiation_Main_Pathway	NA	NA	reactome_Apoptotic_cleavage_of_cellular_proteins_Main_Pathway	NA	NA	NA	NA	NA	NA	NA	NA	NA	NA
reactome_Amyloids_Main_Pathway	KEGG_Pantothenate_and_CoA_biosynthesis_Main_Pathway	NA	NA	reactome_Assembly_of_the_RAD51_ssDNA_nucleoprotein_complex_Main_Pathway	NA	NA	NA	NA	NA	NA	NA	NA	NA	NA
reactome_APC_C_Cdc20_mediated_degradation_of_Cyclin_B_Main_Pathway	KEGG_Pentose_and_glucuronate_interconversions_Main_Pathway	NA	NA	reactome_Astrocytic_Glutamate_Glutamine_Uptake_And_Metabolism_Main_Pathway	NA	NA	NA	NA	NA	NA	NA	NA	NA	NA
reactome_APC_C_Cdc20_mediated_degradation_of_mitotic_proteins_Main_Pathway	KEGG_Pentose_phosphate_Main_Pathway	NA	NA	reactome_ATM_mediated_phosphorylation_of_repair_proteins_Main_Pathway	NA	NA	NA	NA	NA	NA	NA	NA	NA	NA
reactome_APC_Cdc20_mediated_degradation_of_Nek2A_Main_Pathway	KEGG_Phenylalanine_metabolism_Main_Pathway	NA	NA	reactome_Autointegration_results_in_viral_DNA_circles_Main_Pathway	NA	NA	NA	NA	NA	NA	NA	NA	NA	NA
reactome_Apoptotic_cleavage_of_cellular_proteins_Main_Pathway	KEGG_Porphyrin_and_chlorophyll_metabolism_Main_Pathway	NA	NA	reactome_Beta_oxidation_of_butanoyl_CoA_to_acetyl_CoA_Main_Pathway	NA	NA	NA	NA	NA	NA	NA	NA	NA	NA
reactome_Assembly_of_the_RAD51_ssDNA_nucleoprotein_complex_Main_Pathway	KEGG_Progesterone_mediated_oocyte_maturation_Main_Pathway	NA	NA	reactome_CaMK_IV_mediated_phosphorylation_of_CREB_Main_Pathway	NA	NA	NA	NA	NA	NA	NA	NA	NA	NA
reactome_Astrocytic_Glutamate_Glutamine_Uptake_And_Metabolism_Main_Pathway	KEGG_Prostate_cancer_Main_Pathway	NA	NA	reactome_Carnitine_synthesis_Main_Pathway	NA	NA	NA	NA	NA	NA	NA	NA	NA	NA
reactome_ATM_mediated_phosphorylation_of_repair_proteins_Main_Pathway	KEGG_Purine_metabolism_Main_Pathway	NA	NA	reactome_CDC6_association_with_the_ORC_origin_complex_Main_Pathway	NA	NA	NA	NA	NA	NA	NA	NA	NA	NA
reactome_Autointegration_results_in_viral_DNA_circles_Main_Pathway	KEGG_Pyrimidine_metabolism_Main_Pathway	NA	NA	reactome_cell_division_Main_Pathway	NA	NA	NA	NA	NA	NA	NA	NA	NA	NA
reactome_Beta_oxidation_of_butanoyl_CoA_to_acetyl_CoA_Main_Pathway	KEGG_Ribosome_biogenesis_in_eukaryotes_Main_Pathway	NA	NA	reactome_Chk1_Chk2_Cds1_mediated_inactivation_of_Cyclin_B_Cdk1_complex_Main_Pathway	NA	NA	NA	NA	NA	NA	NA	NA	NA	NA
reactome_CaMK_IV_mediated_phosphorylation_of_CREB_Main_Pathway	KEGG_Ribosome_Main_Pathway	NA	NA	reactome_Cohesin_Loading_onto_Chromatin_Main_Pathway	NA	NA	NA	NA	NA	NA	NA	NA	NA	NA
reactome_Carnitine_synthesis_Main_Pathway	KEGG_RNA_degradation_Main_Pathway	NA	NA	reactome_Condensation_of_Prometaphase_Chromosomes_Main_Pathway	NA	NA	NA	NA	NA	NA	NA	NA	NA	NA
reactome_CDC6_association_with_the_ORC_origin_complex_Main_Pathway	KEGG_RNA_polymerase_Main_Pathway	NA	NA	reactome_Condensation_of_Prophase_Chromosomes_Main_Pathway	NA	NA	NA	NA	NA	NA	NA	NA	NA	NA
reactome_cell_division_Main_Pathway	KEGG_RNA_transport_Main_Pathway	NA	NA	reactome_CREB_phosphorylation_through_the_activation_of_CaMKK_Main_Pathway	NA	NA	NA	NA	NA	NA	NA	NA	NA	NA
reactome_Chk1_Chk2_Cds1_mediated_inactivation_of_Cyclin_B_Cdk1_complex_Main_Pathway	KEGG_Selenocompound_metabolism_Main_Pathway	NA	NA	reactome_CRMPs_in_Sema3A_signaling_Main_Pathway	NA	NA	NA	NA	NA	NA	NA	NA	NA	NA
reactome_Cohesin_Loading_onto_Chromatin_Main_Pathway	KEGG_Spliceosome_Main_Pathway	NA	NA	reactome_Cyclin_A_B1_associated_events_during_G2_M_transition_Main_Pathway	NA	NA	NA	NA	NA	NA	NA	NA	NA	NA
reactome_Condensation_of_Prometaphase_Chromosomes_Main_Pathway	KEGG_TGF_beta_signaling_Main_Pathway	NA	NA	reactome_Cyclin_A_Cdk2_associated_events_at_S_phase_entry_Main_Pathway	NA	NA	NA	NA	NA	NA	NA	NA	NA	NA
reactome_Condensation_of_Prophase_Chromosomes_Main_Pathway	KEGG_Transcriptional_misregulation_in_cancer_Main_Pathway	NA	NA	reactome_Cyclin_B2_mediated_events_Main_Pathway	NA	NA	NA	NA	NA	NA	NA	NA	NA	NA
reactome_CREB_phosphorylation_through_the_activation_of_CaMKK_Main_Pathway	KEGG_Tryptophan_metabolism_Main_Pathway	NA	NA	reactome_Deposition_of_new_CENPA_containing_nucleosomes_at_the_centromere_Main_Pathway	NA	NA	NA	NA	NA	NA	NA	NA	NA	NA
reactome_CRMPs_in_Sema3A_signaling_Main_Pathway	KEGG_Tuberculosis_Main_Pathway	NA	NA	reactome_DNA_Damage_Telomere_Stress_Induced_Senescence_Main_Pathway	NA	NA	NA	NA	NA	NA	NA	NA	NA	NA
reactome_Cyclin_A_B1_associated_events_during_G2_M_transition_Main_Pathway	KEGG_Ubiquinone_and_other_terpenoid_quinone_biosynthesis_Main_Pathway	NA	NA	reactome_DNA_replication_initiation_Main_Pathway	NA	NA	NA	NA	NA	NA	NA	NA	NA	NA
reactome_Cyclin_A_Cdk2_associated_events_at_S_phase_entry_Main_Pathway	KEGG_Ubiquitin_mediated_proteolysis_Main_Pathway	NA	NA	reactome_E2F_enabled_inhibition_of_pre_replication_complex_formation_Main_Pathway	NA	NA	NA	NA	NA	NA	NA	NA	NA	NA
reactome_Cyclin_B2_mediated_events_Main_Pathway	KEGG_Vasopressin_regulated_water_reabsorption_Main_Pathway	NA	NA	reactome_E2F_mediated_regulation_of_DNA_replication_Main_Pathway	NA	NA	NA	NA	NA	NA	NA	NA	NA	NA
reactome_Deposition_of_new_CENPA_containing_nucleosomes_at_the_centromere_Main_Pathway	KEGG_Viral_carcinogenesis_Main_Pathway	NA	NA	reactome_Early_Phase_of_HIV_Life_Cycle_Main_Pathway	NA	NA	NA	NA	NA	NA	NA	NA	NA	NA
reactome_DNA_Damage_Telomere_Stress_Induced_Senescence_Main_Pathway	KEGG_Vitamin_digestion_and_absorption_Main_Pathway	NA	NA	reactome_ERK1_activation_Main_Pathway	NA	NA	NA	NA	NA	NA	NA	NA	NA	NA
reactome_DNA_replication_initiation_Main_Pathway	MAPK_Family_Pathway_Chromatin_Remodelling	NA	NA	reactome_Establishment_of_Sister_Chromatid_Cohesion_Main_Pathway	NA	NA	NA	NA	NA	NA	NA	NA	NA	NA
reactome_E2F_enabled_inhibition_of_pre_replication_complex_formation_Main_Pathway	MAPK_Signaling_Pathway_Cell_Survival	NA	NA	reactome_Eukaryotic_Translation_Elongation_Main_Pathway	NA	NA	NA	NA	NA	NA	NA	NA	NA	NA
reactome_E2F_mediated_regulation_of_DNA_replication_Main_Pathway	Mismatch_Repair_in_Eukaryotes_Pathway	NA	NA	reactome_Fanconi_Anemia_Main_Pathway	NA	NA	NA	NA	NA	NA	NA	NA	NA	NA
reactome_Early_Phase_of_HIV_Life_Cycle_Main_Pathway	mTOR_Pathway_Cap-dependent_Translation	NA	NA	reactome_Fatty_Acyl_CoA_Biosynthesis_Main_Pathway	NA	NA	NA	NA	NA	NA	NA	NA	NA	NA
reactome_ERK1_activation_Main_Pathway	mTOR_Pathway_mRNA_Biogenesis	NA	NA	reactome_Formation_of_Senescence_Associated_Heterochromatin_Foci_SAHF__Main_Pathway	NA	NA	NA	NA	NA	NA	NA	NA	NA	NA
reactome_Establishment_of_Sister_Chromatid_Cohesion_Main_Pathway	NCI_ALK2_signaling_events_Main_Pathway	NA	NA	reactome_formation_of_the_beta_catenin_TCF_transactivating_complex_Main_Pathway	NA	NA	NA	NA	NA	NA	NA	NA	NA	NA
reactome_Eukaryotic_Translation_Elongation_Main_Pathway	NCI_Alpha_synuclein_signaling_Main_Pathway	NA	NA	reactome_G1_S_Specific_Transcription_Main_Pathway	NA	NA	NA	NA	NA	NA	NA	NA	NA	NA
reactome_Fanconi_Anemia_Main_Pathway	NCI_Alpha_synuclein_signaling_Pathway_(cell_death)	NA	NA	reactome_G2_M_DNA_replication_checkpoint_Main_Pathway	NA	NA	NA	NA	NA	NA	NA	NA	NA	NA
reactome_Fatty_Acyl_CoA_Biosynthesis_Main_Pathway	NCI_Alpha_synuclein_signaling_Pathway_(proteasomal_ubiquitin_dependent_protein_catabolic_process)	NA	NA	reactome_G2_Phase_Main_Pathway	NA	NA	NA	NA	NA	NA	NA	NA	NA	NA
reactome_Formation_of_Senescence_Associated_Heterochromatin_Foci_SAHF__Main_Pathway	NCI_amb2_Integrin_signaling_Pathway_(leukocyte_adhesion)	NA	NA	reactome_HATs_acetylate_histones_Main_Pathway	NA	NA	NA	NA	NA	NA	NA	NA	NA	NA
reactome_formation_of_the_beta_catenin_TCF_transactivating_complex_Main_Pathway	NCI_Arf6_signaling_events_Main_Pathway	NA	NA	reactome_HDACs_deacetylate_histones_Main_Pathway	NA	NA	NA	NA	NA	NA	NA	NA	NA	NA
reactome_G1_S_Specific_Transcription_Main_Pathway	NCI_ATM_Main_Pathway	NA	NA	reactome_HuR_stabilizes_mRNA_Main_Pathway	NA	NA	NA	NA	NA	NA	NA	NA	NA	NA
reactome_G2_M_DNA_replication_checkpoint_Main_Pathway	NCI_ATM_Pathway_(chromatin_remodeling)	NA	NA	reactome_Inactivation_of_APC_C_via_direct_inhibition_of_the_APC_C_complex_Main_Pathway	NA	NA	NA	NA	NA	NA	NA	NA	NA	NA
reactome_G2_Phase_Main_Pathway	NCI_ATM_Pathway_(double_strand_break_repair_via_nonhomologous_end_joining)	NA	NA	reactome_Inhibition_of_replication_initiation_of_damaged_DNA_by_RB1_E2F1_Main_Pathway	NA	NA	NA	NA	NA	NA	NA	NA	NA	NA
reactome_HATs_acetylate_histones_Main_Pathway	NCI_ATM_Pathway_(G1_S_transition_checkpoint)	NA	NA	reactome_Integration_of_viral_DNA_into_host_genomic_DNA_Main_Pathway	NA	NA	NA	NA	NA	NA	NA	NA	NA	NA
reactome_HDACs_deacetylate_histones_Main_Pathway	NCI_ATM_Pathway_(G2_M_transition_checkpoint)	NA	NA	reactome_Kinesins_Main_Pathway	NA	NA	NA	NA	NA	NA	NA	NA	NA	NA
reactome_HuR_stabilizes_mRNA_Main_Pathway	NCI_ATM_Pathway_(Pathway_rRNA_transcription_via_ATM)	NA	NA	reactome_KSRP_destabilizes_mRNA_Main_Pathway	NA	NA	NA	NA	NA	NA	NA	NA	NA	NA
reactome_Hypusinylation_Main_Pathway	NCI_ATR_signaling_Main_Pathway	NA	NA	reactome_Leading_Strand_Synthesis_Main_Pathway	NA	NA	NA	NA	NA	NA	NA	NA	NA	NA
reactome_Inactivation_of_APC_C_via_direct_inhibition_of_the_APC_C_complex_Main_Pathway	NCI_ATR_signaling_Pathway_(Pathway_negative_regulation_of_transcription_during_mitosis_via_CHEK1)	NA	NA	reactome_Meiotic_recombination_Main_Pathway	NA	NA	NA	NA	NA	NA	NA	NA	NA	NA
reactome_Inhibition_of_replication_initiation_of_damaged_DNA_by_RB1_E2F1_Main_Pathway	NCI_ATR_signaling_Pathway_(regulation_of_double_strand_break_repair_via_homologous_recombination)	NA	NA	reactome_Meiotic_synapsis_Main_Pathway	NA	NA	NA	NA	NA	NA	NA	NA	NA	NA
reactome_Integration_of_viral_DNA_into_host_genomic_DNA_Main_Pathway	NCI_ATR_signaling_Pathway_(response_to_G2_M_transition_DNA_damage_checkpoint_signal)	NA	NA	reactome_Metabolism_of_folate_and_pterines_Main_Pathway	NA	NA	NA	NA	NA	NA	NA	NA	NA	NA
reactome_Interconversion_of_2_oxoglutarate_and_2_hydroxyglutarate_Main_Pathway	NCI_Atypical_NF_kappaB_Main_Pathway	NA	NA	reactome_Mismatch_repair_MMR_directed_by_MSH2_MSH3_MutSbeta__Main_Pathway	NA	NA	NA	NA	NA	NA	NA	NA	NA	NA
reactome_Kinesins_Main_Pathway	NCI_Atypical_NF_kappaB_Pathway_(Pathway_degradation_of_NFKB1_NFKBIA)	NA	NA	reactome_Mismatch_repair_MMR_directed_by_MSH2_MSH6_MutSalpha__Main_Pathway	NA	NA	NA	NA	NA	NA	NA	NA	NA	NA
reactome_KSRP_destabilizes_mRNA_Main_Pathway	NCI_Atypical_NF_kappaB_Pathway_(Pathway_degradation_of_NFKBIA)	NA	NA	reactome_Mitochondrial_transcription_initiation_Main_Pathway	NA	NA	NA	NA	NA	NA	NA	NA	NA	NA
reactome_Leading_Strand_Synthesis_Main_Pathway	NCI_Atypical_NF_kappaB_Pathway_(positive_regulation_of_anti_apoptosis)	NA	NA	reactome_Mitotic_Prometaphase_Main_Pathway	NA	NA	NA	NA	NA	NA	NA	NA	NA	NA
reactome_Meiotic_recombination_Main_Pathway	NCI_Aurora_A_signaling_Main_Pathway	NA	NA	reactome_mRNA_decay_by_3_to_5_exoribonuclease_Main_Pathway	NA	NA	NA	NA	NA	NA	NA	NA	NA	NA
reactome_Meiotic_synapsis_Main_Pathway	NCI_Aurora_A_signaling_Pathway_(centrosome_duplication)	NA	NA	reactome_negative_regulation_of_TCF_dependent_signaling_by_DVL_interacting_proteins_Main_Pathway	NA	NA	NA	NA	NA	NA	NA	NA	NA	NA
reactome_Metabolism_of_folate_and_pterines_Main_Pathway	NCI_Aurora_A_signaling_Pathway_(negative_regulation_of_DNA_binding)	NA	NA	reactome_NEP_NS2_Interacts_with_the_Cellular_Export_Machinery_Main_Pathway	NA	NA	NA	NA	NA	NA	NA	NA	NA	NA
reactome_Mismatch_repair_MMR_directed_by_MSH2_MSH3_MutSbeta__Main_Pathway	NCI_Aurora_A_signaling_Pathway_(proteasomal_ubiquitin_dependent_protein_catabolic_process)	NA	NA	reactome_NoRC_negatively_regulates_rRNA_expression_Main_Pathway	NA	NA	NA	NA	NA	NA	NA	NA	NA	NA
reactome_Mismatch_repair_MMR_directed_by_MSH2_MSH6_MutSalpha__Main_Pathway	NCI_Aurora_A_signaling_Pathway_(protein_catabolic_process)	NA	NA	reactome_Nuclear_import_of_Rev_protein_Main_Pathway	NA	NA	NA	NA	NA	NA	NA	NA	NA	NA
reactome_Mitochondrial_transcription_initiation_Main_Pathway	NCI_Aurora_A_signaling_Pathway_(regulation_of_centrosome_cycle)	NA	NA	reactome_Nuclear_Pore_Complex_NPC_Disassembly_Main_Pathway	NA	NA	NA	NA	NA	NA	NA	NA	NA	NA
reactome_Mitotic_Prometaphase_Main_Pathway	NCI_Aurora_A_signaling_Pathway_(spindle_assembly)	NA	NA	reactome_Orc1_removal_from_chromatin_Main_Pathway	NA	NA	NA	NA	NA	NA	NA	NA	NA	NA
reactome_mRNA_decay_by_3_to_5_exoribonuclease_Main_Pathway	NCI_Aurora_B_signaling_Main_Pathway	NA	NA	reactome_Packaging_Of_Telomere_Ends_Main_Pathway	NA	NA	NA	NA	NA	NA	NA	NA	NA	NA
reactome_negative_regulation_of_TCF_dependent_signaling_by_DVL_interacting_proteins_Main_Pathway	NCI_Aurora_B_signaling_Pathway_(cytokinesis)	NA	NA	reactome_Phosphorylation_of_Emi1_Main_Pathway	NA	NA	NA	NA	NA	NA	NA	NA	NA	NA
reactome_NEP_NS2_Interacts_with_the_Cellular_Export_Machinery_Main_Pathway	NCI_Aurora_C_signaling_Main_Pathway	NA	NA	reactome_Phosphorylation_of_proteins_involved_in_the_G2_M_transition_by_Cyclin_A_Cdc2_complexes_Main_Pathway	NA	NA	NA	NA	NA	NA	NA	NA	NA	NA
reactome_NoRC_negatively_regulates_rRNA_expression_Main_Pathway	NCI_BARD1_signaling_events_Main_Pathway	NA	NA	reactome_Phosphorylation_of_the_APC_C_Main_Pathway	NA	NA	NA	NA	NA	NA	NA	NA	NA	NA
reactome_Nuclear_import_of_Rev_protein_Main_Pathway	NCI_BARD1_signaling_events_Pathway_(DNA_damage_checkpoint)	NA	NA	reactome_Polo_like_kinase_mediated_events_Main_Pathway	NA	NA	NA	NA	NA	NA	NA	NA	NA	NA
reactome_Nuclear_Pore_Complex_NPC_Disassembly_Main_Pathway	NCI_BARD1_signaling_events_Pathway_(DNA_repair)	NA	NA	reactome_Polymerase_switching_Main_Pathway	NA	NA	NA	NA	NA	NA	NA	NA	NA	NA
reactome_Orc1_removal_from_chromatin_Main_Pathway	NCI_BARD1_signaling_events_Pathway_(protein_ubiquitination)	NA	NA	reactome_Polymerase_switching_on_the_C_strand_of_the_telomere_Main_Pathway	NA	NA	NA	NA	NA	NA	NA	NA	NA	NA
reactome_Packaging_Of_Telomere_Ends_Main_Pathway	NCI_BMP_receptor_signaling_Main_Pathway	NA	NA	reactome_PRC2_methylates_histones_and_DNA_Main_Pathway	NA	NA	NA	NA	NA	NA	NA	NA	NA	NA
reactome_Phosphorylation_of_Emi1_Main_Pathway	NCI_C_MYB_transcription_factor_network_Main_Pathway	NA	NA	reactome_pre_mRNA_splicing_Main_Pathway	NA	NA	NA	NA	NA	NA	NA	NA	NA	NA
reactome_Phosphorylation_of_proteins_involved_in_the_G2_M_transition_by_Cyclin_A_Cdc2_complexes_Main_Pathway	NCI_C_MYC_Main_Pathway	NA	NA	reactome_Presynaptic_phase_of_homologous_DNA_pairing_and_strand_exchange_Main_Pathway	NA	NA	NA	NA	NA	NA	NA	NA	NA	NA
reactome_Phosphorylation_of_the_APC_C_Main_Pathway	NCI_Calcineurin_regulated_NFAT_dependent_transcription_in_lymphocytes_Main_Pathway	NA	NA	reactome_Processing_of_DNA_double_strand_break_ends_Main_Pathway	NA	NA	NA	NA	NA	NA	NA	NA	NA	NA
reactome_Polo_like_kinase_mediated_events_Main_Pathway	NCI_Caspase_Cascade_in_Apoptosis_Pathway_(actin_filament_polymerization)	NA	NA	reactome_Processing_of_DNA_ends_prior_to_end_rejoining_Main_Pathway	NA	NA	NA	NA	NA	NA	NA	NA	NA	NA
reactome_Polymerase_switching_Main_Pathway	NCI_Caspase_Cascade_in_Apoptosis_Pathway_(DNA_fragmentation_during_apoptosis)	NA	NA	reactome_Processive_synthesis_on_the_C_strand_of_the_telomere_Main_Pathway	NA	NA	NA	NA	NA	NA	NA	NA	NA	NA
reactome_Polymerase_switching_on_the_C_strand_of_the_telomere_Main_Pathway	NCI_Caspase_Cascade_in_Apoptosis_Pathway_(DNA_repair)	NA	NA	reactome_Processive_synthesis_on_the_lagging_strand_Main_Pathway	NA	NA	NA	NA	NA	NA	NA	NA	NA	NA
reactome_PRC2_methylates_histones_and_DNA_Main_Pathway	NCI_Caspase_Cascade_in_Apoptosis_Pathway_(neuron_apoptosis)	NA	NA	reactome_Purine_ribonucleoside_monophosphate_biosynthesis_Main_Pathway	NA	NA	NA	NA	NA	NA	NA	NA	NA	NA
reactome_pre_mRNA_splicing_Main_Pathway	NCI_Caspase_Cascade_in_Apoptosis_Pathway_(nuclear_fragmentation_during_apoptosis)	NA	NA	reactome_Pyrimidine_biosynthesis_Main_Pathway	NA	NA	NA	NA	NA	NA	NA	NA	NA	NA
reactome_Presynaptic_phase_of_homologous_DNA_pairing_and_strand_exchange_Main_Pathway	NCI_Caspase_Cascade_in_Apoptosis_Pathway_(positive_regulation_of_apoptosis)	NA	NA	reactome_Pyrimidine_salvage_reactions_Main_Pathway	NA	NA	NA	NA	NA	NA	NA	NA	NA	NA
reactome_Processing_of_DNA_double_strand_break_ends_Main_Pathway	NCI_CDC42_signaling_events_Pathway_(neuron_projection_development)	NA	NA	reactome_Recruitment_of_NuMA_to_mitotic_centrosomes_Main_Pathway	NA	NA	NA	NA	NA	NA	NA	NA	NA	NA
reactome_Processing_of_DNA_ends_prior_to_end_rejoining_Main_Pathway	NCI_CDC42_signaling_events_Pathway_(regulation_of_filopodium_assembly)	NA	NA	reactome_Recruitment_of_repair_and_signaling_proteins_to_double_strand_breaks_Main_Pathway	NA	NA	NA	NA	NA	NA	NA	NA	NA	NA
reactome_Processive_synthesis_on_the_C_strand_of_the_telomere_Main_Pathway	NCI_Ceramide_signaling_Pathway_(cell_survival)	NA	NA	reactome_Regulation_of_APC_C_activators_between_G1_S_and_early_anaphase_Main_Pathway	NA	NA	NA	NA	NA	NA	NA	NA	NA	NA
reactome_Processive_synthesis_on_the_lagging_strand_Main_Pathway	NCI_Circadian_rhythm_Main_Pathway	NA	NA	reactome_Regulation_of_Glucokinase_by_Glucokinase_Regulatory_Protein_Main_Pathway	NA	NA	NA	NA	NA	NA	NA	NA	NA	NA
reactome_Purine_ribonucleoside_monophosphate_biosynthesis_Main_Pathway	NCI_Circadian_rhythm_Pathway_(chromatin_modification)	NA	NA	reactome_Removal_of_DNA_patch_containing_abasic_residue_Main_Pathway	NA	NA	NA	NA	NA	NA	NA	NA	NA	NA
reactome_Pyrimidine_biosynthesis_Main_Pathway	NCI_Circadian_rhythm_Pathway_(S_phase_of_mitotic_cell_cycle)	NA	NA	reactome_Removal_of_the_Flap_Intermediate_from_the_C_strand_Main_Pathway	NA	NA	NA	NA	NA	NA	NA	NA	NA	NA
reactome_Pyrimidine_salvage_reactions_Main_Pathway	NCI_Class_I_PI3K_signaling_events_mediated_by_Akt_Pathway_(glucose_import)	NA	NA	reactome_Removal_of_the_Flap_Intermediate_Main_Pathway	NA	NA	NA	NA	NA	NA	NA	NA	NA	NA
reactome_Recruitment_of_NuMA_to_mitotic_centrosomes_Main_Pathway	NCI_Class_IB_PI3K_non_lipid_kinase_events_Main_Pathway	NA	NA	reactome_Repair_synthesis_for_gap_filling_by_DNA_polymerase_in_TC_NER_Main_Pathway	NA	NA	NA	NA	NA	NA	NA	NA	NA	NA
reactome_Recruitment_of_repair_and_signaling_proteins_to_double_strand_breaks_Main_Pathway	NCI_Class_IB_PI3K_non_lipid_kinase_events_Pathway_(cAMP_biosynthetic_process)	NA	NA	reactome_Repair_synthesis_of_patch_27_30_bases_long_by_DNA_polymerase_Main_Pathway	NA	NA	NA	NA	NA	NA	NA	NA	NA	NA
reactome_Regulation_of_APC_C_activators_between_G1_S_and_early_anaphase_Main_Pathway	NCI_CXCR3_mediated_signaling_events_Main_Pathway	NA	NA	reactome_repression_of_WNT_target_genes_Main_Pathway	NA	NA	NA	NA	NA	NA	NA	NA	NA	NA
reactome_Regulation_of_Glucokinase_by_Glucokinase_Regulatory_Protein_Main_Pathway	NCI_CXCR3_mediated_signaling_events_Pathway_(actin_polymerization_or_depolymerization)	NA	NA	reactome_Resolution_of_AP_sites_via_the_multiple_nucleotide_patch_replacement_Main_Pathway	NA	NA	NA	NA	NA	NA	NA	NA	NA	NA
reactome_Removal_of_DNA_patch_containing_abasic_residue_Main_Pathway	NCI_CXCR3_mediated_signaling_events_Pathway_(cell_adhesion)	NA	NA	reactome_Resolution_of_AP_sites_via_the_single_nucleotide_replacement_Main_Pathway	NA	NA	NA	NA	NA	NA	NA	NA	NA	NA
reactome_Removal_of_the_Flap_Intermediate_from_the_C_strand_Main_Pathway	NCI_CXCR3_mediated_signaling_events_Pathway_(cell_proliferation)	NA	NA	reactome_Resolution_of_Sister_Chromatid_Cohesion_Main_Pathway	NA	NA	NA	NA	NA	NA	NA	NA	NA	NA
reactome_Removal_of_the_Flap_Intermediate_Main_Pathway	NCI_CXCR3_mediated_signaling_events_Pathway_(chemotaxis)	NA	NA	reactome_Rev_mediated_nuclear_export_of_HIV_RNA_Main_Pathway	NA	NA	NA	NA	NA	NA	NA	NA	NA	NA
reactome_Repair_synthesis_for_gap_filling_by_DNA_polymerase_in_TC_NER_Main_Pathway	NCI_CXCR4_mediated_signaling_events_Main_Pathway	NA	NA	reactome_RMTs_methylate_histone_arginines_Main_Pathway	NA	NA	NA	NA	NA	NA	NA	NA	NA	NA
reactome_Repair_synthesis_of_patch_27_30_bases_long_by_DNA_polymerase_Main_Pathway	NCI_CXCR4_mediated_signaling_events_Pathway_(cell_adhesion)	NA	NA	reactome_RNA_Polymerase_I_Chain_Elongation_Main_Pathway	NA	NA	NA	NA	NA	NA	NA	NA	NA	NA
reactome_repression_of_WNT_target_genes_Main_Pathway	NCI_CXCR4_mediated_signaling_events_Pathway_(cell_proliferation)	NA	NA	reactome_Role_of_second_messengers_in_netrin_1_signaling_Main_Pathway	NA	NA	NA	NA	NA	NA	NA	NA	NA	NA
reactome_Resolution_of_AP_sites_via_the_multiple_nucleotide_patch_replacement_Main_Pathway	NCI_CXCR4_mediated_signaling_events_Pathway_(chemotaxis)	NA	NA	reactome_Senescence_Associated_Secretory_Phenotype_SASP__Main_Pathway	NA	NA	NA	NA	NA	NA	NA	NA	NA	NA
reactome_Resolution_of_AP_sites_via_the_single_nucleotide_replacement_Main_Pathway	NCI_CXCR4_mediated_signaling_events_Pathway_(establishment_of_cell_polarity)	NA	NA	reactome_Separation_of_Sister_Chromatids_Main_Pathway	NA	NA	NA	NA	NA	NA	NA	NA	NA	NA
reactome_Resolution_of_Sister_Chromatid_Cohesion_Main_Pathway	NCI_CXCR4_mediated_signaling_events_Pathway_(regulation_of_heterotypic_cell_cell_adhesion)	NA	NA	reactome_SIRT1_negatively_regulates_rRNA_Expression_Main_Pathway	NA	NA	NA	NA	NA	NA	NA	NA	NA	NA
reactome_Rev_mediated_nuclear_export_of_HIV_RNA_Main_Pathway	NCI_DNA_PK_pathway_in_nonhomologous_end_joining_Main_Pathway	NA	NA	reactome_SLBP_Dependent_Processing_of_Replication_Dependent_Histone_Pre_mRNAs_Main_Pathway	NA	NA	NA	NA	NA	NA	NA	NA	NA	NA
reactome_RMTs_methylate_histone_arginines_Main_Pathway	NCI_DNA_PK_pathway_in_nonhomologous_end_joining_Pathway_(double_strand_break_repair_via_homologous_recombination)	NA	NA	reactome_SLBP_independent_Processing_of_Histone_Pre_mRNAs_Main_Pathway	NA	NA	NA	NA	NA	NA	NA	NA	NA	NA
reactome_RNA_Polymerase_I_Chain_Elongation_Main_Pathway	NCI_DNA_PK_pathway_in_nonhomologous_end_joining_Pathway_(double_strand_break_repair_via_nonhomologous_end_joining)	NA	NA	reactome_snRNP_Assembly_Main_Pathway	NA	NA	NA	NA	NA	NA	NA	NA	NA	NA
reactome_Role_of_second_messengers_in_netrin_1_signaling_Main_Pathway	NCI_DNA_PK_pathway_in_nonhomologous_end_joining_Pathway_(immunoglobulin_heavy_chain_V_D_J_recombination)	NA	NA	reactome_Sodium_Proton_exchangers_Main_Pathway	NA	NA	NA	NA	NA	NA	NA	NA	NA	NA
reactome_Senescence_Associated_Secretory_Phenotype_SASP__Main_Pathway	NCI_DNA_PK_pathway_in_nonhomologous_end_joining_Pathway_(immunoglobulin_light_chain_V_J_recombination)	NA	NA	reactome_SUMO_is_conjugated_to_E1_UBA2_SAE1__Main_Pathway	NA	NA	NA	NA	NA	NA	NA	NA	NA	NA
reactome_Separation_of_Sister_Chromatids_Main_Pathway	NCI_DNA_PK_pathway_in_nonhomologous_end_joining_Pathway_(V_D_J_recombination)	NA	NA	reactome_SUMO_is_proteolytically_processed_Main_Pathway	NA	NA	NA	NA	NA	NA	NA	NA	NA	NA
reactome_SIRT1_negatively_regulates_rRNA_Expression_Main_Pathway	NCI_E_cadherin_signaling_in_the_nascent_adherens_junction_Pathway_(actin_cytoskeleton_organization)	NA	NA	reactome_SUMO_is_transferred_from_E1_to_E2_UBE2I_UBC9__Main_Pathway	NA	NA	NA	NA	NA	NA	NA	NA	NA	NA
reactome_SLBP_Dependent_Processing_of_Replication_Dependent_Histone_Pre_mRNAs_Main_Pathway	NCI_Endogenous_TLR_signaling_Pathway_(regulation_of_cell_adhesion)	NA	NA	reactome_Switching_of_origins_to_a_post_replicative_state_Main_Pathway	NA	NA	NA	NA	NA	NA	NA	NA	NA	NA
reactome_SLBP_independent_Processing_of_Histone_Pre_mRNAs_Main_Pathway	NCI_Endothelins_Pathway_(arachidonic_acid_secretion)	NA	NA	reactome_Synthesis_of_16_20_hydroxyeicosatetraenoic_acids_HETE__Main_Pathway	NA	NA	NA	NA	NA	NA	NA	NA	NA	NA
reactome_snRNP_Assembly_Main_Pathway	NCI_Ephrin_B_reverse_signaling_Pathway_(endothelial_cell_proliferation)	NA	NA	reactome_Synthesis_of_PIPs_at_the_late_endosome_membrane_Main_Pathway	NA	NA	NA	NA	NA	NA	NA	NA	NA	NA
reactome_Sodium_Proton_exchangers_Main_Pathway	NCI_ErbB2_ErbB3_signaling_events_Pathway_(apoptosis)	NA	NA	reactome_Telomere_C_strand_Lagging_Strand_Synthesis_Main_Pathway	NA	NA	NA	NA	NA	NA	NA	NA	NA	NA
reactome_SUMO_is_conjugated_to_E1_UBA2_SAE1__Main_Pathway	NCI_Fanconi_anemia_Main_Pathway	NA	NA	reactome_Telomere_C_strand_synthesis_initiation_Main_Pathway	NA	NA	NA	NA	NA	NA	NA	NA	NA	NA
reactome_SUMO_is_proteolytically_processed_Main_Pathway	NCI_Fanconi_anemia_Pathway_(DNA_repair)	NA	NA	reactome_Telomere_Extension_By_Telomerase_Main_Pathway	NA	NA	NA	NA	NA	NA	NA	NA	NA	NA
reactome_SUMO_is_transferred_from_E1_to_E2_UBE2I_UBC9__Main_Pathway	NCI_Fanconi_anemia_Pathway_(G1_S_transition_checkpoint)	NA	NA	reactome_Toxicity_of_botulinum_toxin_type_C_BoNT_C__Main_Pathway	NA	NA	NA	NA	NA	NA	NA	NA	NA	NA
reactome_Switching_of_origins_to_a_post_replicative_state_Main_Pathway	NCI_Fanconi_anemia_Pathway_(regulation_of_double_strand_break_repair_via_homologous_recombination)	NA	NA	reactome_Toxicity_of_botulinum_toxin_type_E_BoNT_E__Main_Pathway	NA	NA	NA	NA	NA	NA	NA	NA	NA	NA
reactome_Synthesis_of_16_20_hydroxyeicosatetraenoic_acids_HETE__Main_Pathway	NCI_Fanconi_anemia_Pathway_(Sister_Chromatid_Exchange_Process)	NA	NA	reactome_Transcriptional_activation_of_mitochondrial_biogenesis_Main_Pathway	NA	NA	NA	NA	NA	NA	NA	NA	NA	NA
reactome_Synthesis_of_PIPs_at_the_late_endosome_membrane_Main_Pathway	NCI_FAS_CD95_signaling_Pathway_(cell_cycle)	NA	NA	reactome_Transport_of_Mature_mRNA_derived_from_an_Intron_Containing_Transcript_Main_Pathway	NA	NA	NA	NA	NA	NA	NA	NA	NA	NA
reactome_Telomere_C_strand_Lagging_Strand_Synthesis_Main_Pathway	NCI_FGF_signaling_Pathway_(cell_migration)	NA	NA	reactome_Transport_of_Mature_mRNA_Derived_from_an_Intronless_Transcript_Main_Pathway	NA	NA	NA	NA	NA	NA	NA	NA	NA	NA
reactome_Telomere_C_strand_synthesis_initiation_Main_Pathway	NCI_FGF_signaling_Pathway_(negative_regulation_of_apoptosis)	NA	NA	reactome_Transport_of_Ribonucleoproteins_into_the_Host_Nucleus_Main_Pathway	NA	NA	NA	NA	NA	NA	NA	NA	NA	NA
reactome_Telomere_Extension_By_Telomerase_Main_Pathway	NCI_FOXM1_transcription_factor_network_Main_Pathway	NA	NA	reactome_Transport_of_the_SLBP_Dependant_Mature_mRNA_Main_Pathway	NA	NA	NA	NA	NA	NA	NA	NA	NA	NA
reactome_Toxicity_of_botulinum_toxin_type_C_BoNT_C__Main_Pathway	NCI_Glucocorticoid_receptor_regulatory_network_Pathway_(apoptosis)	NA	NA	reactome_Transport_of_the_SLBP_independent_Mature_mRNA_Main_Pathway	NA	NA	NA	NA	NA	NA	NA	NA	NA	NA
reactome_Toxicity_of_botulinum_toxin_type_E_BoNT_E__Main_Pathway	NCI_Glucocorticoid_receptor_regulatory_network_Pathway_(histone_acetylation)	NA	NA	reactome_Transport_of_vitamins_nucleosides_and_related_molecules_Main_Pathway	NA	NA	NA	NA	NA	NA	NA	NA	NA	NA
reactome_Transcriptional_activation_of_mitochondrial_biogenesis_Main_Pathway	NCI_Glucocorticoid_receptor_regulatory_network_Pathway_(MAPKKK_cascade)	NA	NA	reactome_Ubiquinol_biosynthesis_Main_Pathway	NA	NA	NA	NA	NA	NA	NA	NA	NA	NA
reactome_Transport_of_Mature_mRNA_derived_from_an_Intron_Containing_Transcript_Main_Pathway	NCI_Glypican_2_network_Main_Pathway	NA	NA	reactome_Unwinding_of_DNA_Main_Pathway	NA	NA	NA	NA	NA	NA	NA	NA	NA	NA
reactome_Transport_of_Mature_mRNA_Derived_from_an_Intronless_Transcript_Main_Pathway	NCI_HIF_1_alpha_transcription_factor_network_Main_Pathway	NA	NA	reactome_Vitamin_B5_pantothenate_metabolism_Main_Pathway	NA	NA	NA	NA	NA	NA	NA	NA	NA	NA
reactome_Transport_of_Ribonucleoproteins_into_the_Host_Nucleus_Main_Pathway	NCI_HIF_2_alpha_transcription_factor_network_Main_Pathway	NA	NA	reactome_Vpr_mediated_nuclear_import_of_PICs_Main_Pathway	NA	NA	NA	NA	NA	NA	NA	NA	NA	NA
reactome_Transport_of_the_SLBP_Dependant_Mature_mRNA_Main_Pathway	NCI_HIF_2_alpha_transcription_factor_network_Pathway_(neuron_apoptosis)	NA	NA	reactome_WNT5A_dependent_internalization_of_FZD2_FZD5_and_ROR2_Main_Pathway	NA	NA	NA	NA	NA	NA	NA	NA	NA	NA
reactome_Transport_of_the_SLBP_independent_Mature_mRNA_Main_Pathway	NCI_HIV_1_Nef_Negative_effector_of_Fas_and_TNF_alpha_Main_Pathway	NA	NA	reactome_WNT5A_dependent_internalization_of_FZD4_Main_Pathway	NA	NA	NA	NA	NA	NA	NA	NA	NA	NA
reactome_Transport_of_vitamins_nucleosides_and_related_molecules_Main_Pathway	NCI_HIV_1_Nef_Negative_effector_of_Fas_and_TNF_alpha_Pathway_(Pathway_degradation_of_CASP3_CASP7_CASP6)	NA	NA	NA	NA	NA	NA	NA	NA	NA	NA	NA	NA	NA
reactome_Ubiquinol_biosynthesis_Main_Pathway	NCI_HIV_1_Nef_Negative_effector_of_Fas_and_TNF_alpha_Pathway_(protein_ubiquitination)	NA	NA	NA	NA	NA	NA	NA	NA	NA	NA	NA	NA	NA
reactome_Unwinding_of_DNA_Main_Pathway	NCI_Hypoxic_and_oxygen_homeostasis_regulation_of_HIF_1_alpha_Main_Pathway	NA	NA	NA	NA	NA	NA	NA	NA	NA	NA	NA	NA	NA
reactome_Vitamin_B5_pantothenate_metabolism_Main_Pathway	NCI_IL2_mediated_signaling_events_Pathway_(G1_S_transition_of_mitotic_cell_cycle)	NA	NA	NA	NA	NA	NA	NA	NA	NA	NA	NA	NA	NA
reactome_Vpr_mediated_induction_of_apoptosis_by_mitochondrial_outer_membrane_permeabilization_Main_Pathway	NCI_IL3_mediated_signaling_events_Main_Pathway	NA	NA	NA	NA	NA	NA	NA	NA	NA	NA	NA	NA	NA
reactome_Vpr_mediated_nuclear_import_of_PICs_Main_Pathway	NCI_IL8_and_CXCR1_mediated_signaling_events_Main_Pathway	NA	NA	NA	NA	NA	NA	NA	NA	NA	NA	NA	NA	NA
reactome_WNT5A_dependent_internalization_of_FZD2_FZD5_and_ROR2_Main_Pathway	NCI_IL8_and_CXCR1_mediated_signaling_events_Pathway_(basophil_degranulation)	NA	NA	NA	NA	NA	NA	NA	NA	NA	NA	NA	NA	NA
reactome_WNT5A_dependent_internalization_of_FZD4_Main_Pathway	NCI_IL8_and_CXCR1_mediated_signaling_events_Pathway_(cAMP_biosynthetic_process)	NA	NA	NA	NA	NA	NA	NA	NA	NA	NA	NA	NA	NA
NA	NCI_IL8_and_CXCR2_mediated_signaling_events_Main_Pathway	NA	NA	NA	NA	NA	NA	NA	NA	NA	NA	NA	NA	NA
NA	NCI_IL8_and_CXCR2_mediated_signaling_events_Pathway_(cAMP_biosynthetic_process)	NA	NA	NA	NA	NA	NA	NA	NA	NA	NA	NA	NA	NA
NA	NCI_IL8_and_CXCR2_mediated_signaling_events_Pathway_(Pathway_degradation_of_CXCL8)	NA	NA	NA	NA	NA	NA	NA	NA	NA	NA	NA	NA	NA
NA	NCI_Insulin_Pathway_Main_Pathway	NA	NA	NA	NA	NA	NA	NA	NA	NA	NA	NA	NA	NA
NA	NCI_Integrin_linked_kinase_signaling_Pathway_(centrosome_localization)	NA	NA	NA	NA	NA	NA	NA	NA	NA	NA	NA	NA	NA
NA	NCI_Integrin_linked_kinase_signaling_Pathway_(DNA_biosynthetic_process)	NA	NA	NA	NA	NA	NA	NA	NA	NA	NA	NA	NA	NA
NA	NCI_Lissencephaly_gene_LIS1_in_neuronal_migration_and_development_Main_Pathway	NA	NA	NA	NA	NA	NA	NA	NA	NA	NA	NA	NA	NA
NA	NCI_LPA4_mediated_signaling_events_Main_Pathway	NA	NA	NA	NA	NA	NA	NA	NA	NA	NA	NA	NA	NA
NA	NCI_LPA4_mediated_signaling_events_Pathway_(cAMP_biosynthetic_process)	NA	NA	NA	NA	NA	NA	NA	NA	NA	NA	NA	NA	NA
NA	NCI_mTOR_signaling_Pathway_(translational_initiation)	NA	NA	NA	NA	NA	NA	NA	NA	NA	NA	NA	NA	NA
NA	NCI_N_cadherin_signaling_events_Pathway_(axonogenesis)	NA	NA	NA	NA	NA	NA	NA	NA	NA	NA	NA	NA	NA
NA	NCI_Nectin_adhesion_Pathway_(positive_regulation_of_lamellipodium_assembly)	NA	NA	NA	NA	NA	NA	NA	NA	NA	NA	NA	NA	NA
NA	NCI_Nephrin_Neph1_signaling_in_the_kidney_podocyte_Pathway_(apoptosis)	NA	NA	NA	NA	NA	NA	NA	NA	NA	NA	NA	NA	NA
NA	NCI_Noncanonical_Wnt_signaling_Main_Pathway	NA	NA	NA	NA	NA	NA	NA	NA	NA	NA	NA	NA	NA
NA	NCI_Nongenotropic_Androgen_signaling_Main_Pathway	NA	NA	NA	NA	NA	NA	NA	NA	NA	NA	NA	NA	NA
NA	NCI_Nongenotropic_Androgen_signaling_Pathway_(apoptosis)	NA	NA	NA	NA	NA	NA	NA	NA	NA	NA	NA	NA	NA
NA	NCI_Notch_mediated_HES_HEY_network_Main_Pathway	NA	NA	NA	NA	NA	NA	NA	NA	NA	NA	NA	NA	NA
NA	NCI_p38_MAPK_signaling_Main_Pathway	NA	NA	NA	NA	NA	NA	NA	NA	NA	NA	NA	NA	NA
NA	NCI_p75_NTR_mediated_signaling_Pathway_(neuron_apoptosis)	NA	NA	NA	NA	NA	NA	NA	NA	NA	NA	NA	NA	NA
NA	NCI_PAR4_mediated_thrombin_signaling_events_Main_Pathway	NA	NA	NA	NA	NA	NA	NA	NA	NA	NA	NA	NA	NA
NA	NCI_PDGF_receptor_signaling_network_Main_Pathway	NA	NA	NA	NA	NA	NA	NA	NA	NA	NA	NA	NA	NA
NA	NCI_PDGF_receptor_signaling_network_Pathway_(platelet_derived_growth_factor_receptor_signaling_pathway)	NA	NA	NA	NA	NA	NA	NA	NA	NA	NA	NA	NA	NA
NA	NCI_PDGFR_alpha_signaling_Main_Pathway	NA	NA	NA	NA	NA	NA	NA	NA	NA	NA	NA	NA	NA
NA	NCI_PDGFR_alpha_signaling_Pathway_(JAK_STAT_cascade)	NA	NA	NA	NA	NA	NA	NA	NA	NA	NA	NA	NA	NA
NA	NCI_PDGFR_alpha_signaling_Pathway_(positive_regulation_of_JUN_kinase_activity)	NA	NA	NA	NA	NA	NA	NA	NA	NA	NA	NA	NA	NA
NA	NCI_PDGFR_alpha_signaling_Pathway_(Ras_protein_signal_transduction)	NA	NA	NA	NA	NA	NA	NA	NA	NA	NA	NA	NA	NA
NA	NCI_PDGFR_beta_signaling_Pathway_(actin_cytoskeleton_organization)	NA	NA	NA	NA	NA	NA	NA	NA	NA	NA	NA	NA	NA
NA	NCI_PDGFR_beta_signaling_Pathway_(receptor_recycling)	NA	NA	NA	NA	NA	NA	NA	NA	NA	NA	NA	NA	NA
NA	NCI_PLK1_signaling_events_Main_Pathway	NA	NA	NA	NA	NA	NA	NA	NA	NA	NA	NA	NA	NA
NA	NCI_PLK1_signaling_events_Pathway_(chromosome_segregation)	NA	NA	NA	NA	NA	NA	NA	NA	NA	NA	NA	NA	NA
NA	NCI_PLK1_signaling_events_Pathway_(cytokinesis)	NA	NA	NA	NA	NA	NA	NA	NA	NA	NA	NA	NA	NA
NA	NCI_PLK1_signaling_events_Pathway_(G2_M_transition_of_mitotic_cell_cycle)	NA	NA	NA	NA	NA	NA	NA	NA	NA	NA	NA	NA	NA
NA	NCI_PLK1_signaling_events_Pathway_(Golgi_organization)	NA	NA	NA	NA	NA	NA	NA	NA	NA	NA	NA	NA	NA
NA	NCI_PLK1_signaling_events_Pathway_(metaphase_plate_congression)	NA	NA	NA	NA	NA	NA	NA	NA	NA	NA	NA	NA	NA
NA	NCI_PLK1_signaling_events_Pathway_(microtubule_cytoskeleton_organization)	NA	NA	NA	NA	NA	NA	NA	NA	NA	NA	NA	NA	NA
NA	NCI_PLK1_signaling_events_Pathway_(positive_regulation_of_microtubule_depolymerization)	NA	NA	NA	NA	NA	NA	NA	NA	NA	NA	NA	NA	NA
NA	NCI_PLK1_signaling_events_Pathway_(proteasomal_ubiquitin_dependent_protein_catabolic_process)	NA	NA	NA	NA	NA	NA	NA	NA	NA	NA	NA	NA	NA
NA	NCI_PLK1_signaling_events_Pathway_(regulation_of_attachment_of_spindle_microtubules_to_kinetochore)	NA	NA	NA	NA	NA	NA	NA	NA	NA	NA	NA	NA	NA
NA	NCI_PLK1_signaling_events_Pathway_(regulation_of_centriole_centriole_cohesion)	NA	NA	NA	NA	NA	NA	NA	NA	NA	NA	NA	NA	NA
NA	NCI_PLK1_signaling_events_Pathway_(regulation_of_mitotic_centrosome_separation)	NA	NA	NA	NA	NA	NA	NA	NA	NA	NA	NA	NA	NA
NA	NCI_PLK1_signaling_events_Pathway_(spindle_assembly)	NA	NA	NA	NA	NA	NA	NA	NA	NA	NA	NA	NA	NA
NA	NCI_PLK1_signaling_events_Pathway_(spindle_elongation)	NA	NA	NA	NA	NA	NA	NA	NA	NA	NA	NA	NA	NA
NA	NCI_PLK1_signaling_events_Pathway_(spindle_stabilization)	NA	NA	NA	NA	NA	NA	NA	NA	NA	NA	NA	NA	NA
NA	NCI_PLK2_and_PLK4_events_Main_Pathway	NA	NA	NA	NA	NA	NA	NA	NA	NA	NA	NA	NA	NA
NA	NCI_PLK2_and_PLK4_events_Pathway_(regulation_of_centriole_replication)	NA	NA	NA	NA	NA	NA	NA	NA	NA	NA	NA	NA	NA
NA	NCI_Proteoglycan_syndecan_mediated_signaling_events_Main_Pathway	NA	NA	NA	NA	NA	NA	NA	NA	NA	NA	NA	NA	NA
NA	NCI_RAC1_signaling_Pathway_(neuron_projection_development)	NA	NA	NA	NA	NA	NA	NA	NA	NA	NA	NA	NA	NA
NA	NCI_RAC1_signaling_Pathway_(regulation_of_cell_cycle)	NA	NA	NA	NA	NA	NA	NA	NA	NA	NA	NA	NA	NA
NA	NCI_Reelin_signaling_Main_Pathway	NA	NA	NA	NA	NA	NA	NA	NA	NA	NA	NA	NA	NA
NA	NCI_Reelin_signaling_Pathway_(long_term_memory)	NA	NA	NA	NA	NA	NA	NA	NA	NA	NA	NA	NA	NA
NA	NCI_Reelin_signaling_Pathway_(neuron_migration)	NA	NA	NA	NA	NA	NA	NA	NA	NA	NA	NA	NA	NA
NA	NCI_Regulation_of_Androgen_receptor_activity_Pathway_(Pathway_positive_regulation_of_transcription_via_GATA2)	NA	NA	NA	NA	NA	NA	NA	NA	NA	NA	NA	NA	NA
NA	NCI_Regulation_of_cytoplasmic_and_nuclear_SMAD2_3_signaling_Main_Pathway	NA	NA	NA	NA	NA	NA	NA	NA	NA	NA	NA	NA	NA
NA	NCI_Regulation_of_nuclear_SMAD2_3_signaling_Main_Pathway	NA	NA	NA	NA	NA	NA	NA	NA	NA	NA	NA	NA	NA
NA	NCI_Regulation_of_nuclear_SMAD2_3_signaling_Pathway_(muscle_cell_differentiation)	NA	NA	NA	NA	NA	NA	NA	NA	NA	NA	NA	NA	NA
NA	NCI_Regulation_of_nuclear_SMAD2_3_signaling_Pathway_(negative_regulation_of_cell_growth)	NA	NA	NA	NA	NA	NA	NA	NA	NA	NA	NA	NA	NA
NA	NCI_Regulation_of_nuclear_SMAD2_3_signaling_Pathway_(Pathway_degradation_of_SMAD3)	NA	NA	NA	NA	NA	NA	NA	NA	NA	NA	NA	NA	NA
NA	NCI_Regulation_of_retinoblastoma_protein_Main_Pathway	NA	NA	NA	NA	NA	NA	NA	NA	NA	NA	NA	NA	NA
NA	NCI_Regulation_of_retinoblastoma_protein_Pathway_(erythrocyte_differentiation)	NA	NA	NA	NA	NA	NA	NA	NA	NA	NA	NA	NA	NA
NA	NCI_Regulation_of_retinoblastoma_protein_Pathway_(histone_methylation)	NA	NA	NA	NA	NA	NA	NA	NA	NA	NA	NA	NA	NA
NA	NCI_Regulation_of_retinoblastoma_protein_Pathway_(Pathway_rRNA_transcription_via_RB1)	NA	NA	NA	NA	NA	NA	NA	NA	NA	NA	NA	NA	NA
NA	NCI_Regulation_of_retinoblastoma_protein_Pathway_(proteasomal_ubiquitin_dependent_protein_catabolic_process)	NA	NA	NA	NA	NA	NA	NA	NA	NA	NA	NA	NA	NA
NA	NCI_Regulation_of_Telomerase_Main_Pathway	NA	NA	NA	NA	NA	NA	NA	NA	NA	NA	NA	NA	NA
NA	NCI_Retinoic_acid_receptors_mediated_signaling_Main_Pathway	NA	NA	NA	NA	NA	NA	NA	NA	NA	NA	NA	NA	NA
NA	NCI_Retinoic_acid_receptors_mediated_signaling_Pathway_(proteasomal_ubiquitin_dependent_protein_catabolic_process)	NA	NA	NA	NA	NA	NA	NA	NA	NA	NA	NA	NA	NA
NA	NCI_RhoA_signaling_Pathway_(Golgi_organization)	NA	NA	NA	NA	NA	NA	NA	NA	NA	NA	NA	NA	NA
NA	NCI_Role_of_Calcineurin_dependent_NFAT_signaling_in_lymphocytes_Main_Pathway	NA	NA	NA	NA	NA	NA	NA	NA	NA	NA	NA	NA	NA
NA	NCI_RXR_and_RAR_heterodimerization_with_other_nuclear_receptor_Main_Pathway	NA	NA	NA	NA	NA	NA	NA	NA	NA	NA	NA	NA	NA
NA	NCI_Signaling_events_mediated_by_HDAC_Class_I_Main_Pathway	NA	NA	NA	NA	NA	NA	NA	NA	NA	NA	NA	NA	NA
NA	NCI_Signaling_events_mediated_by_HDAC_Class_I_Pathway_(histone_deacetylation)	NA	NA	NA	NA	NA	NA	NA	NA	NA	NA	NA	NA	NA
NA	NCI_Signaling_events_mediated_by_Hepatocyte_Growth_Factor_Receptor_c_Met__Main_Pathway	NA	NA	NA	NA	NA	NA	NA	NA	NA	NA	NA	NA	NA
NA	NCI_Signaling_events_mediated_by_Hepatocyte_Growth_Factor_Receptor_c_Met__Pathway_(apoptosis)	NA	NA	NA	NA	NA	NA	NA	NA	NA	NA	NA	NA	NA
NA	NCI_Signaling_events_mediated_by_Hepatocyte_Growth_Factor_Receptor_c_Met__Pathway_(Pathway_positive_regulation_of_NF_kappaB_transcription_factor_activity_via_RAF1)	NA	NA	NA	NA	NA	NA	NA	NA	NA	NA	NA	NA	NA
NA	NCI_Signaling_events_mediated_by_Hepatocyte_Growth_Factor_Receptor_c_Met__Pathway_(positive_regulation_of_tyrosine_phosphorylation_of_STAT_protein)	NA	NA	NA	NA	NA	NA	NA	NA	NA	NA	NA	NA	NA
NA	NCI_Signaling_events_mediated_by_Hepatocyte_Growth_Factor_Receptor_c_Met__Pathway_(translational_initiation)	NA	NA	NA	NA	NA	NA	NA	NA	NA	NA	NA	NA	NA
NA	NCI_Signaling_events_mediated_by_PRL_Main_Pathway	NA	NA	NA	NA	NA	NA	NA	NA	NA	NA	NA	NA	NA
NA	NCI_Signaling_events_mediated_by_TCPTP_Main_Pathway	NA	NA	NA	NA	NA	NA	NA	NA	NA	NA	NA	NA	NA
NA	NCI_Signaling_events_mediated_by_TCPTP_Pathway_(G1_S_transition_of_mitotic_cell_cycle)	NA	NA	NA	NA	NA	NA	NA	NA	NA	NA	NA	NA	NA
NA	NCI_Signaling_events_mediated_by_TCPTP_Pathway_(macrophage_differentiation)	NA	NA	NA	NA	NA	NA	NA	NA	NA	NA	NA	NA	NA
NA	NCI_Signaling_events_mediated_by_TCPTP_Pathway_(MAPKKK_cascade)	NA	NA	NA	NA	NA	NA	NA	NA	NA	NA	NA	NA	NA
NA	NCI_Signaling_events_mediated_by_TCPTP_Pathway_(positive_regulation_of_S_phase_of_mitotic_cell_cycle)	NA	NA	NA	NA	NA	NA	NA	NA	NA	NA	NA	NA	NA
NA	NCI_Signaling_events_mediated_by_TCPTP_Pathway_(regulation_of_gluconeogenesis)	NA	NA	NA	NA	NA	NA	NA	NA	NA	NA	NA	NA	NA
NA	NCI_Signaling_events_mediated_by_the_Hedgehog_family_Main_Pathway	NA	NA	NA	NA	NA	NA	NA	NA	NA	NA	NA	NA	NA
NA	NCI_Signaling_events_mediated_by_the_Hedgehog_family_Pathway_(catabolic_process)	NA	NA	NA	NA	NA	NA	NA	NA	NA	NA	NA	NA	NA
NA	NCI_Signaling_events_mediated_by_the_Hedgehog_family_Pathway_(determination_of_left_right_symmetry)	NA	NA	NA	NA	NA	NA	NA	NA	NA	NA	NA	NA	NA
NA	NCI_Signaling_events_mediated_by_the_Hedgehog_family_Pathway_(heart_development)	NA	NA	NA	NA	NA	NA	NA	NA	NA	NA	NA	NA	NA
NA	NCI_Signaling_events_mediated_by_the_Hedgehog_family_Pathway_(heart_looping)	NA	NA	NA	NA	NA	NA	NA	NA	NA	NA	NA	NA	NA
NA	NCI_Signaling_events_mediated_by_the_Hedgehog_family_Pathway_(pancreas_development)	NA	NA	NA	NA	NA	NA	NA	NA	NA	NA	NA	NA	NA
NA	NCI_Signaling_events_mediated_by_the_Hedgehog_family_Pathway_(somite_specification)	NA	NA	NA	NA	NA	NA	NA	NA	NA	NA	NA	NA	NA
NA	NCI_Signaling_events_mediated_by_VEGFR1_and_VEGFR2_Pathway_(Pathway_degradation_of_AKAP1)	NA	NA	NA	NA	NA	NA	NA	NA	NA	NA	NA	NA	NA
NA	NCI_Signaling_mediated_by_p38_gamma_and_p38_delta_Main_Pathway	NA	NA	NA	NA	NA	NA	NA	NA	NA	NA	NA	NA	NA
NA	NCI_Signaling_mediated_by_p38_gamma_and_p38_delta_Pathway_(G2_M_transition_checkpoint)	NA	NA	NA	NA	NA	NA	NA	NA	NA	NA	NA	NA	NA
NA	NCI_Sumoylation_by_RanBP2_regulates_transcriptional_repression_Main_Pathway	NA	NA	NA	NA	NA	NA	NA	NA	NA	NA	NA	NA	NA
NA	NCI_Syndecan_3_mediated_signaling_events_Main_Pathway	NA	NA	NA	NA	NA	NA	NA	NA	NA	NA	NA	NA	NA
NA	NCI_Syndecan_4_mediated_signaling_events_Main_Pathway	NA	NA	NA	NA	NA	NA	NA	NA	NA	NA	NA	NA	NA
NA	NCI_Thromboxane_A2_receptor_signaling_Main_Pathway	NA	NA	NA	NA	NA	NA	NA	NA	NA	NA	NA	NA	NA
NA	NCI_Thromboxane_A2_receptor_signaling_Pathway_(cAMP_biosynthetic_process)	NA	NA	NA	NA	NA	NA	NA	NA	NA	NA	NA	NA	NA
NA	NCI_Thromboxane_A2_receptor_signaling_Pathway_(JNK_cascade)	NA	NA	NA	NA	NA	NA	NA	NA	NA	NA	NA	NA	NA
NA	NCI_Thromboxane_A2_receptor_signaling_Pathway_(platelet_activation)	NA	NA	NA	NA	NA	NA	NA	NA	NA	NA	NA	NA	NA
NA	NCI_TRAIL_signaling_Main_Pathway	NA	NA	NA	NA	NA	NA	NA	NA	NA	NA	NA	NA	NA
NA	NCI_Trk_receptor_signaling_mediated_by_PI3K_and_PLC_gamma_Pathway_(regulation_of_long_term_neuronal_synaptic_plasticity)	NA	NA	NA	NA	NA	NA	NA	NA	NA	NA	NA	NA	NA
NA	NCI_Trk_receptor_signaling_mediated_by_the_MAPK_Main_Pathway	NA	NA	NA	NA	NA	NA	NA	NA	NA	NA	NA	NA	NA
NA	NCI_Trk_receptor_signaling_mediated_by_the_MAPK_Pathway_(neuron_apoptosis)	NA	NA	NA	NA	NA	NA	NA	NA	NA	NA	NA	NA	NA
NA	NCI_Validated_nuclear_estrogen_receptor_beta_network_Main_Pathway	NA	NA	NA	NA	NA	NA	NA	NA	NA	NA	NA	NA	NA
NA	NCI_Validated_targets_of_C_MYC_transcriptional_activation_Main_Pathway	NA	NA	NA	NA	NA	NA	NA	NA	NA	NA	NA	NA	NA
NA	NCI_Validated_targets_of_C_MYC_transcriptional_activation_Pathway_(Pathway_rRNA_transcription_via_MAX)	NA	NA	NA	NA	NA	NA	NA	NA	NA	NA	NA	NA	NA
NA	NCI_Validated_targets_of_C_MYC_transcriptional_repression_Main_Pathway	NA	NA	NA	NA	NA	NA	NA	NA	NA	NA	NA	NA	NA
NA	NCI_Validated_targets_of_C_MYC_transcriptional_repression_Pathway_(cell_cycle_arrest)	NA	NA	NA	NA	NA	NA	NA	NA	NA	NA	NA	NA	NA
NA	NCI_Validated_transcriptional_targets_of_AP1_family_members_Fra1_and_Fra2_Main_Pathway	NA	NA	NA	NA	NA	NA	NA	NA	NA	NA	NA	NA	NA
NA	NGF_Pathway_Neuronal_Survival	NA	NA	NA	NA	NA	NA	NA	NA	NA	NA	NA	NA	NA
NA	p53_Signaling_Pathway	NA	NA	NA	NA	NA	NA	NA	NA	NA	NA	NA	NA	NA
NA	p53_Signaling_Pathway_Apoptosis	NA	NA	NA	NA	NA	NA	NA	NA	NA	NA	NA	NA	NA
NA	p53_Signaling_Pathway_Breast_Cancer	NA	NA	NA	NA	NA	NA	NA	NA	NA	NA	NA	NA	NA
NA	p53_Signaling_Pathway_Cancer	NA	NA	NA	NA	NA	NA	NA	NA	NA	NA	NA	NA	NA
NA	p53_Signaling_Pathway_Cell_Cycle_Arrest	NA	NA	NA	NA	NA	NA	NA	NA	NA	NA	NA	NA	NA
NA	p53_Signaling_Pathway_Cell_Growth_Accumulation	NA	NA	NA	NA	NA	NA	NA	NA	NA	NA	NA	NA	NA
NA	p53_Signaling_Pathway_DNA_Repair	NA	NA	NA	NA	NA	NA	NA	NA	NA	NA	NA	NA	NA
NA	p53_Signaling_Pathway_Exosome_Mediated_Secretion	NA	NA	NA	NA	NA	NA	NA	NA	NA	NA	NA	NA	NA
NA	p53_Signaling_Pathway_Gene_Expression_Anti-Apoptosis_via_TP53	NA	NA	NA	NA	NA	NA	NA	NA	NA	NA	NA	NA	NA
NA	p53_Signaling_Pathway_Gene_Expression_Cell_Cycle_and_Cell_Growth_via_TP53	NA	NA	NA	NA	NA	NA	NA	NA	NA	NA	NA	NA	NA
NA	p53_Signaling_Pathway_Gene_Expression_Cell_Fate_and_Development_via_TP53	NA	NA	NA	NA	NA	NA	NA	NA	NA	NA	NA	NA	NA
NA	p53_Signaling_Pathway_Gene_Expression_Cell_Signaling_via_TP53	NA	NA	NA	NA	NA	NA	NA	NA	NA	NA	NA	NA	NA
NA	p53_Signaling_Pathway_Gene_Expression_DNA_Replication_and_Repair_via_TP53	NA	NA	NA	NA	NA	NA	NA	NA	NA	NA	NA	NA	NA
NA	p53_Signaling_Pathway_Gene_Expression_ECM_and_Adhesion_via_TP53	NA	NA	NA	NA	NA	NA	NA	NA	NA	NA	NA	NA	NA
NA	p53_Signaling_Pathway_Gene_Expression_Infection_and_Immune_Response_via_TP53	NA	NA	NA	NA	NA	NA	NA	NA	NA	NA	NA	NA	NA
NA	p53_Signaling_Pathway_Inhibition_of_Angiogenesis_and_Metastasis	NA	NA	NA	NA	NA	NA	NA	NA	NA	NA	NA	NA	NA
NA	p53_Signaling_Pathway_Normal_Cell_Cycle_Progression	NA	NA	NA	NA	NA	NA	NA	NA	NA	NA	NA	NA	NA
NA	PPAR_Pathway	NA	NA	NA	NA	NA	NA	NA	NA	NA	NA	NA	NA	NA
NA	PPAR_Pathway_Adipocyte_Differentiation_Glucose_Homeostasis_and_Macrophage_Function	NA	NA	NA	NA	NA	NA	NA	NA	NA	NA	NA	NA	NA
NA	PPAR_Pathway_Fatty_Acid_Metabolism_Lipid_Homeostasis_and_Skin_Proliferation	NA	NA	NA	NA	NA	NA	NA	NA	NA	NA	NA	NA	NA
NA	PPAR_Pathway_Peroxisome_Proliferation_Hepatocarcinogenesis_Fatty_Acid_Metbolism_and_Lipid_Homeostasis	NA	NA	NA	NA	NA	NA	NA	NA	NA	NA	NA	NA	NA
NA	PTEN_Pathway_Cell_Cycle	NA	NA	NA	NA	NA	NA	NA	NA	NA	NA	NA	NA	NA
NA	PTEN_Pathway_Differentiation	NA	NA	NA	NA	NA	NA	NA	NA	NA	NA	NA	NA	NA
NA	PTEN_Pathway_DNA_Repair	NA	NA	NA	NA	NA	NA	NA	NA	NA	NA	NA	NA	NA
NA	PTEN_Pathway_Genomic_Stability	NA	NA	NA	NA	NA	NA	NA	NA	NA	NA	NA	NA	NA
NA	PTEN_Pathway_Growth	NA	NA	NA	NA	NA	NA	NA	NA	NA	NA	NA	NA	NA
NA	RANK_Signaling_in_Osteoclasts_Pathway_Inhibition_of_Death	NA	NA	NA	NA	NA	NA	NA	NA	NA	NA	NA	NA	NA
NA	Ras_Pathway_Gene_Expression_Cell_Proliferation_Cell_Survival_Differentiation_Development_Cell_Cycle_Control_Cell_Motility_Tumorigenesis_via_ELK4_ATF2_MEF2D_STAT2_CREB3_CCNA1_MYC_ELK1_JUN_CDK4	NA	NA	NA	NA	NA	NA	NA	NA	NA	NA	NA	NA	NA
NA	Ras_Pathway_Receptor_Endocytosis	NA	NA	NA	NA	NA	NA	NA	NA	NA	NA	NA	NA	NA
NA	reactome_2_LTR_circle_formation_Main_Pathway	NA	NA	NA	NA	NA	NA	NA	NA	NA	NA	NA	NA	NA
NA	reactome_A_tetrasaccharide_linker_sequence_is_required_for_GAG_synthesis_Main_Pathway	NA	NA	NA	NA	NA	NA	NA	NA	NA	NA	NA	NA	NA
NA	reactome_ABC_family_proteins_mediated_transport_Main_Pathway	NA	NA	NA	NA	NA	NA	NA	NA	NA	NA	NA	NA	NA
NA	reactome_Abnormal_metabolism_in_phenylketonuria_Main_Pathway	NA	NA	NA	NA	NA	NA	NA	NA	NA	NA	NA	NA	NA
NA	reactome_Abortive_elongation_of_HIV_1_transcript_in_the_absence_of_Tat_Main_Pathway	NA	NA	NA	NA	NA	NA	NA	NA	NA	NA	NA	NA	NA
NA	reactome_Acetylcholine_regulates_insulin_secretion_Main_Pathway	NA	NA	NA	NA	NA	NA	NA	NA	NA	NA	NA	NA	NA
NA	reactome_activated_TAK1_mediates_p38_MAPK_activation_Main_Pathway	NA	NA	NA	NA	NA	NA	NA	NA	NA	NA	NA	NA	NA
NA	reactome_Activation_of_ATR_in_response_to_replication_stress_Main_Pathway	NA	NA	NA	NA	NA	NA	NA	NA	NA	NA	NA	NA	NA
NA	reactome_Activation_of_BIM_and_translocation_to_mitochondria_Main_Pathway	NA	NA	NA	NA	NA	NA	NA	NA	NA	NA	NA	NA	NA
NA	reactome_Activation_of_DNA_fragmentation_factor_Main_Pathway	NA	NA	NA	NA	NA	NA	NA	NA	NA	NA	NA	NA	NA
NA	reactome_Activation_of_gene_expression_by_SREBF_SREBP__Main_Pathway	NA	NA	NA	NA	NA	NA	NA	NA	NA	NA	NA	NA	NA
NA	reactome_Activation_of_NIMA_Kinases_NEK9_NEK6_NEK7_Main_Pathway	NA	NA	NA	NA	NA	NA	NA	NA	NA	NA	NA	NA	NA
NA	reactome_Activation_of_NOXA_and_translocation_to_mitochondria_Main_Pathway	NA	NA	NA	NA	NA	NA	NA	NA	NA	NA	NA	NA	NA
NA	reactome_Activation_of_PUMA_and_translocation_to_mitochondria_Main_Pathway	NA	NA	NA	NA	NA	NA	NA	NA	NA	NA	NA	NA	NA
NA	reactome_Activation_of_Rac_Main_Pathway	NA	NA	NA	NA	NA	NA	NA	NA	NA	NA	NA	NA	NA
NA	reactome_Activation_of_the_pre_replicative_complex_Main_Pathway	NA	NA	NA	NA	NA	NA	NA	NA	NA	NA	NA	NA	NA
NA	reactome_Acyl_chain_remodelling_of_PE_Main_Pathway	NA	NA	NA	NA	NA	NA	NA	NA	NA	NA	NA	NA	NA
NA	reactome_Acyl_chain_remodelling_of_PS_Main_Pathway	NA	NA	NA	NA	NA	NA	NA	NA	NA	NA	NA	NA	NA
NA	reactome_Adenylate_cyclase_activating_Main_Pathway	NA	NA	NA	NA	NA	NA	NA	NA	NA	NA	NA	NA	NA
NA	reactome_Advanced_glycosylation_endproduct_receptor_signaling_Main_Pathway	NA	NA	NA	NA	NA	NA	NA	NA	NA	NA	NA	NA	NA
NA	reactome_AKT_phosphorylates_targets_in_the_cytosol_Main_Pathway	NA	NA	NA	NA	NA	NA	NA	NA	NA	NA	NA	NA	NA
NA	reactome_AKT_phosphorylates_targets_in_the_nucleus_Main_Pathway	NA	NA	NA	NA	NA	NA	NA	NA	NA	NA	NA	NA	NA
NA	reactome_alpha_linolenic_acid_ALA_metabolism_Main_Pathway	NA	NA	NA	NA	NA	NA	NA	NA	NA	NA	NA	NA	NA
NA	reactome_Amino_acid_synthesis_and_interconversion_transamination__Main_Pathway	NA	NA	NA	NA	NA	NA	NA	NA	NA	NA	NA	NA	NA
NA	reactome_Amyloids_Main_Pathway	NA	NA	NA	NA	NA	NA	NA	NA	NA	NA	NA	NA	NA
NA	reactome_APC_C_Cdc20_mediated_degradation_of_Cyclin_B_Main_Pathway	NA	NA	NA	NA	NA	NA	NA	NA	NA	NA	NA	NA	NA
NA	reactome_APC_C_Cdc20_mediated_degradation_of_mitotic_proteins_Main_Pathway	NA	NA	NA	NA	NA	NA	NA	NA	NA	NA	NA	NA	NA
NA	reactome_APC_C_Cdh1_mediated_degradation_of_Cdc20_and_other_APC_C_Cdh1_targeted_proteins_in_late_mitosis_early_G1_Main_Pathway	NA	NA	NA	NA	NA	NA	NA	NA	NA	NA	NA	NA	NA
NA	reactome_APC_Cdc20_mediated_degradation_of_Nek2A_Main_Pathway	NA	NA	NA	NA	NA	NA	NA	NA	NA	NA	NA	NA	NA
NA	reactome_APOBEC3G_mediated_resistance_to_HIV_1_infection_Main_Pathway	NA	NA	NA	NA	NA	NA	NA	NA	NA	NA	NA	NA	NA
NA	reactome_Apoptotic_cleavage_of_cellular_proteins_Main_Pathway	NA	NA	NA	NA	NA	NA	NA	NA	NA	NA	NA	NA	NA
NA	reactome_Assembly_of_the_ORC_complex_at_the_origin_of_replication_Main_Pathway	NA	NA	NA	NA	NA	NA	NA	NA	NA	NA	NA	NA	NA
NA	reactome_Assembly_of_the_RAD50_MRE11_NBS1_complex_at_DNA_double_strand_breaks_Main_Pathway	NA	NA	NA	NA	NA	NA	NA	NA	NA	NA	NA	NA	NA
NA	reactome_Assembly_of_the_RAD51_ssDNA_nucleoprotein_complex_Main_Pathway	NA	NA	NA	NA	NA	NA	NA	NA	NA	NA	NA	NA	NA
NA	reactome_Association_of_TriC_CCT_with_target_proteins_during_biosynthesis_Main_Pathway	NA	NA	NA	NA	NA	NA	NA	NA	NA	NA	NA	NA	NA
NA	reactome_Astrocytic_Glutamate_Glutamine_Uptake_And_Metabolism_Main_Pathway	NA	NA	NA	NA	NA	NA	NA	NA	NA	NA	NA	NA	NA
NA	reactome_ATM_mediated_phosphorylation_of_repair_proteins_Main_Pathway	NA	NA	NA	NA	NA	NA	NA	NA	NA	NA	NA	NA	NA
NA	reactome_ATP_sensitive_Potassium_channels_Main_Pathway	NA	NA	NA	NA	NA	NA	NA	NA	NA	NA	NA	NA	NA
NA	reactome_Attenuation_phase_Main_Pathway	NA	NA	NA	NA	NA	NA	NA	NA	NA	NA	NA	NA	NA
NA	reactome_Autointegration_results_in_viral_DNA_circles_Main_Pathway	NA	NA	NA	NA	NA	NA	NA	NA	NA	NA	NA	NA	NA
NA	reactome_Beta_oxidation_of_butanoyl_CoA_to_acetyl_CoA_Main_Pathway	NA	NA	NA	NA	NA	NA	NA	NA	NA	NA	NA	NA	NA
NA	reactome_Beta_oxidation_of_decanoyl_CoA_to_octanoyl_CoA_CoA_Main_Pathway	NA	NA	NA	NA	NA	NA	NA	NA	NA	NA	NA	NA	NA
NA	reactome_Beta_oxidation_of_hexanoyl_CoA_to_butanoyl_CoA_Main_Pathway	NA	NA	NA	NA	NA	NA	NA	NA	NA	NA	NA	NA	NA
NA	reactome_Beta_oxidation_of_octanoyl_CoA_to_hexanoyl_CoA_Main_Pathway	NA	NA	NA	NA	NA	NA	NA	NA	NA	NA	NA	NA	NA
NA	reactome_Beta_oxidation_of_pristanoyl_CoA_Main_Pathway	NA	NA	NA	NA	NA	NA	NA	NA	NA	NA	NA	NA	NA
NA	reactome_BH3_only_proteins_associate_with_and_inactivate_anti_apoptotic_BCL_2_members_Main_Pathway	NA	NA	NA	NA	NA	NA	NA	NA	NA	NA	NA	NA	NA
NA	reactome_Bicarbonate_transporters_Main_Pathway	NA	NA	NA	NA	NA	NA	NA	NA	NA	NA	NA	NA	NA
NA	reactome_Biosynthesis_of_the_N_glycan_precursor_dolichol_lipid_linked_oligosaccharide_LLO_and_transfer_to_a_nascent_protein_Main_Pathway	NA	NA	NA	NA	NA	NA	NA	NA	NA	NA	NA	NA	NA
NA	reactome_Biotin_transport_and_metabolism_Main_Pathway	NA	NA	NA	NA	NA	NA	NA	NA	NA	NA	NA	NA	NA
NA	reactome_Butyrate_Response_Factor_1_BRF1_destabilizes_mRNA_Main_Pathway	NA	NA	NA	NA	NA	NA	NA	NA	NA	NA	NA	NA	NA
NA	reactome_Calmodulin_induced_events_Main_Pathway	NA	NA	NA	NA	NA	NA	NA	NA	NA	NA	NA	NA	NA
NA	reactome_CaMK_IV_mediated_phosphorylation_of_CREB_Main_Pathway	NA	NA	NA	NA	NA	NA	NA	NA	NA	NA	NA	NA	NA
NA	reactome_Carnitine_synthesis_Main_Pathway	NA	NA	NA	NA	NA	NA	NA	NA	NA	NA	NA	NA	NA
NA	reactome_Cdc20_Phospho_APC_C_mediated_degradation_of_Cyclin_A_Main_Pathway	NA	NA	NA	NA	NA	NA	NA	NA	NA	NA	NA	NA	NA
NA	reactome_CDC6_association_with_the_ORC_origin_complex_Main_Pathway	NA	NA	NA	NA	NA	NA	NA	NA	NA	NA	NA	NA	NA
NA	reactome_CDT1_association_with_the_CDC6_ORC_origin_complex_Main_Pathway	NA	NA	NA	NA	NA	NA	NA	NA	NA	NA	NA	NA	NA
NA	reactome_cell_division_Main_Pathway	NA	NA	NA	NA	NA	NA	NA	NA	NA	NA	NA	NA	NA
NA	reactome_Chk1_Chk2_Cds1_mediated_inactivation_of_Cyclin_B_Cdk1_complex_Main_Pathway	NA	NA	NA	NA	NA	NA	NA	NA	NA	NA	NA	NA	NA
NA	reactome_CHL1_interactions_Main_Pathway	NA	NA	NA	NA	NA	NA	NA	NA	NA	NA	NA	NA	NA
NA	reactome_Cholesterol_biosynthesis_Main_Pathway	NA	NA	NA	NA	NA	NA	NA	NA	NA	NA	NA	NA	NA
NA	reactome_Chylomicron_mediated_lipid_transport_Main_Pathway	NA	NA	NA	NA	NA	NA	NA	NA	NA	NA	NA	NA	NA
NA	reactome_Clearance_of_Nuclear_Envelope_Membranes_from_Chromatin_Main_Pathway	NA	NA	NA	NA	NA	NA	NA	NA	NA	NA	NA	NA	NA
NA	reactome_Cleavage_of_Growing_Transcript_in_the_Termination_Region_Main_Pathway	NA	NA	NA	NA	NA	NA	NA	NA	NA	NA	NA	NA	NA
NA	reactome_Cleavage_of_the_damaged_purine_Main_Pathway	NA	NA	NA	NA	NA	NA	NA	NA	NA	NA	NA	NA	NA
NA	reactome_Cobalamin_Cbl_vitamin_B12_transport_and_metabolism_Main_Pathway	NA	NA	NA	NA	NA	NA	NA	NA	NA	NA	NA	NA	NA
NA	reactome_Cohesin_Loading_onto_Chromatin_Main_Pathway	NA	NA	NA	NA	NA	NA	NA	NA	NA	NA	NA	NA	NA
NA	reactome_Condensation_of_Prometaphase_Chromosomes_Main_Pathway	NA	NA	NA	NA	NA	NA	NA	NA	NA	NA	NA	NA	NA
NA	reactome_Condensation_of_Prophase_Chromosomes_Main_Pathway	NA	NA	NA	NA	NA	NA	NA	NA	NA	NA	NA	NA	NA
NA	reactome_Constitutive_Signaling_by_NOTCH1_HD_PEST_Domain_Mutants_Main_Pathway	NA	NA	NA	NA	NA	NA	NA	NA	NA	NA	NA	NA	NA
NA	reactome_Constitutive_Signaling_by_NOTCH1_PEST_Domain_Mutants_Main_Pathway	NA	NA	NA	NA	NA	NA	NA	NA	NA	NA	NA	NA	NA
NA	reactome_Conversion_from_APC_C_Cdc20_to_APC_C_Cdh1_in_late_anaphase_Main_Pathway	NA	NA	NA	NA	NA	NA	NA	NA	NA	NA	NA	NA	NA
NA	reactome_CREB_phosphorylation_Main_Pathway	NA	NA	NA	NA	NA	NA	NA	NA	NA	NA	NA	NA	NA
NA	reactome_CREB_phosphorylation_through_the_activation_of_Adenylate_Cyclase_Main_Pathway	NA	NA	NA	NA	NA	NA	NA	NA	NA	NA	NA	NA	NA
NA	reactome_CREB_phosphorylation_through_the_activation_of_CaMKK_Main_Pathway	NA	NA	NA	NA	NA	NA	NA	NA	NA	NA	NA	NA	NA
NA	reactome_CRMPs_in_Sema3A_signaling_Main_Pathway	NA	NA	NA	NA	NA	NA	NA	NA	NA	NA	NA	NA	NA
NA	reactome_Cyclin_A_B1_associated_events_during_G2_M_transition_Main_Pathway	NA	NA	NA	NA	NA	NA	NA	NA	NA	NA	NA	NA	NA
NA	reactome_Cyclin_A_Cdk2_associated_events_at_S_phase_entry_Main_Pathway	NA	NA	NA	NA	NA	NA	NA	NA	NA	NA	NA	NA	NA
NA	reactome_Cyclin_B2_mediated_events_Main_Pathway	NA	NA	NA	NA	NA	NA	NA	NA	NA	NA	NA	NA	NA
NA	reactome_Cyclin_E_associated_events_during_G1_S_transition_Main_Pathway	NA	NA	NA	NA	NA	NA	NA	NA	NA	NA	NA	NA	NA
NA	reactome_Cytosolic_iron_sulfur_cluster_assembly_Main_Pathway	NA	NA	NA	NA	NA	NA	NA	NA	NA	NA	NA	NA	NA
NA	reactome_Cytosolic_sensors_of_pathogen_associated_DNA_Main_Pathway	NA	NA	NA	NA	NA	NA	NA	NA	NA	NA	NA	NA	NA
NA	reactome_Cytosolic_tRNA_aminoacylation_Main_Pathway	NA	NA	NA	NA	NA	NA	NA	NA	NA	NA	NA	NA	NA
NA	reactome_DARPP_32_events_Main_Pathway	NA	NA	NA	NA	NA	NA	NA	NA	NA	NA	NA	NA	NA
NA	reactome_Deadenylation_of_mRNA_Main_Pathway	NA	NA	NA	NA	NA	NA	NA	NA	NA	NA	NA	NA	NA
NA	reactome_Degradation_of_cysteine_and_homocysteine_Main_Pathway	NA	NA	NA	NA	NA	NA	NA	NA	NA	NA	NA	NA	NA
NA	reactome_Depolymerisation_of_the_Nuclear_Lamina_Main_Pathway	NA	NA	NA	NA	NA	NA	NA	NA	NA	NA	NA	NA	NA
NA	reactome_Deposition_of_new_CENPA_containing_nucleosomes_at_the_centromere_Main_Pathway	NA	NA	NA	NA	NA	NA	NA	NA	NA	NA	NA	NA	NA
NA	reactome_Dimerization_of_procaspase_8_Main_Pathway	NA	NA	NA	NA	NA	NA	NA	NA	NA	NA	NA	NA	NA
NA	reactome_Displacement_of_DNA_glycosylase_by_APE1_Main_Pathway	NA	NA	NA	NA	NA	NA	NA	NA	NA	NA	NA	NA	NA
NA	reactome_DNA_Damage_Telomere_Stress_Induced_Senescence_Main_Pathway	NA	NA	NA	NA	NA	NA	NA	NA	NA	NA	NA	NA	NA
NA	reactome_DNA_replication_initiation_Main_Pathway	NA	NA	NA	NA	NA	NA	NA	NA	NA	NA	NA	NA	NA
NA	reactome_Dual_incision_reaction_in_GG_NER_Main_Pathway	NA	NA	NA	NA	NA	NA	NA	NA	NA	NA	NA	NA	NA
NA	reactome_Dual_incision_reaction_in_TC_NER_Main_Pathway	NA	NA	NA	NA	NA	NA	NA	NA	NA	NA	NA	NA	NA
NA	reactome_E2F_enabled_inhibition_of_pre_replication_complex_formation_Main_Pathway	NA	NA	NA	NA	NA	NA	NA	NA	NA	NA	NA	NA	NA
NA	reactome_E2F_mediated_regulation_of_DNA_replication_Main_Pathway	NA	NA	NA	NA	NA	NA	NA	NA	NA	NA	NA	NA	NA
NA	reactome_Early_Phase_of_HIV_Life_Cycle_Main_Pathway	NA	NA	NA	NA	NA	NA	NA	NA	NA	NA	NA	NA	NA
NA	reactome_Electric_Transmission_Across_Gap_Junctions_Main_Pathway	NA	NA	NA	NA	NA	NA	NA	NA	NA	NA	NA	NA	NA
NA	reactome_Elongation_arrest_and_recovery_Main_Pathway	NA	NA	NA	NA	NA	NA	NA	NA	NA	NA	NA	NA	NA
NA	reactome_ERK_MAPK_targets_Main_Pathway	NA	NA	NA	NA	NA	NA	NA	NA	NA	NA	NA	NA	NA
NA	reactome_ERK1_activation_Main_Pathway	NA	NA	NA	NA	NA	NA	NA	NA	NA	NA	NA	NA	NA
NA	reactome_Establishment_of_Sister_Chromatid_Cohesion_Main_Pathway	NA	NA	NA	NA	NA	NA	NA	NA	NA	NA	NA	NA	NA
NA	reactome_Eukaryotic_Translation_Elongation_Main_Pathway	NA	NA	NA	NA	NA	NA	NA	NA	NA	NA	NA	NA	NA
NA	reactome_Fanconi_Anemia_Main_Pathway	NA	NA	NA	NA	NA	NA	NA	NA	NA	NA	NA	NA	NA
NA	reactome_Fatty_Acyl_CoA_Biosynthesis_Main_Pathway	NA	NA	NA	NA	NA	NA	NA	NA	NA	NA	NA	NA	NA
NA	reactome_FGFR2b_ligand_binding_and_activation_Main_Pathway	NA	NA	NA	NA	NA	NA	NA	NA	NA	NA	NA	NA	NA
NA	reactome_Folding_of_actin_by_CCT_TriC_Main_Pathway	NA	NA	NA	NA	NA	NA	NA	NA	NA	NA	NA	NA	NA
NA	reactome_Formation_of_HIV_1_elongation_complex_containing_HIV_1_Tat_Main_Pathway	NA	NA	NA	NA	NA	NA	NA	NA	NA	NA	NA	NA	NA
NA	reactome_Formation_of_HIV_elongation_complex_in_the_absence_of_HIV_Tat_Main_Pathway	NA	NA	NA	NA	NA	NA	NA	NA	NA	NA	NA	NA	NA
NA	reactome_Formation_of_incision_complex_in_GG_NER_Main_Pathway	NA	NA	NA	NA	NA	NA	NA	NA	NA	NA	NA	NA	NA
NA	reactome_Formation_of_RNA_Pol_II_elongation_complex_Main_Pathway	NA	NA	NA	NA	NA	NA	NA	NA	NA	NA	NA	NA	NA
NA	reactome_Formation_of_Senescence_Associated_Heterochromatin_Foci_SAHF__Main_Pathway	NA	NA	NA	NA	NA	NA	NA	NA	NA	NA	NA	NA	NA
NA	reactome_Formation_of_the_active_cofactor_UDP_glucuronate_Main_Pathway	NA	NA	NA	NA	NA	NA	NA	NA	NA	NA	NA	NA	NA
NA	reactome_formation_of_the_beta_catenin_TCF_transactivating_complex_Main_Pathway	NA	NA	NA	NA	NA	NA	NA	NA	NA	NA	NA	NA	NA
NA	reactome_Formation_of_the_Early_Elongation_Complex_Main_Pathway	NA	NA	NA	NA	NA	NA	NA	NA	NA	NA	NA	NA	NA
NA	reactome_Formation_of_the_HIV_1_Early_Elongation_Complex_Main_Pathway	NA	NA	NA	NA	NA	NA	NA	NA	NA	NA	NA	NA	NA
NA	reactome_Formation_of_transcription_coupled_NER_TC_NER_repair_complex_Main_Pathway	NA	NA	NA	NA	NA	NA	NA	NA	NA	NA	NA	NA	NA
NA	reactome_Formation_of_tubulin_folding_intermediates_by_CCT_TriC_Main_Pathway	NA	NA	NA	NA	NA	NA	NA	NA	NA	NA	NA	NA	NA
NA	reactome_G0_and_Early_G1_Main_Pathway	NA	NA	NA	NA	NA	NA	NA	NA	NA	NA	NA	NA	NA
NA	reactome_G1_S_Specific_Transcription_Main_Pathway	NA	NA	NA	NA	NA	NA	NA	NA	NA	NA	NA	NA	NA
NA	reactome_G2_M_DNA_damage_checkpoint_Main_Pathway	NA	NA	NA	NA	NA	NA	NA	NA	NA	NA	NA	NA	NA
NA	reactome_G2_M_DNA_replication_checkpoint_Main_Pathway	NA	NA	NA	NA	NA	NA	NA	NA	NA	NA	NA	NA	NA
NA	reactome_G2_Phase_Main_Pathway	NA	NA	NA	NA	NA	NA	NA	NA	NA	NA	NA	NA	NA
NA	reactome_Gastrin_CREB_signalling_pathway_via_PKC_and_MAPK_Main_Pathway	NA	NA	NA	NA	NA	NA	NA	NA	NA	NA	NA	NA	NA
NA	reactome_Glutathione_synthesis_and_recycling_Main_Pathway	NA	NA	NA	NA	NA	NA	NA	NA	NA	NA	NA	NA	NA
NA	reactome_HATs_acetylate_histones_Main_Pathway	NA	NA	NA	NA	NA	NA	NA	NA	NA	NA	NA	NA	NA
NA	reactome_HDACs_deacetylate_histones_Main_Pathway	NA	NA	NA	NA	NA	NA	NA	NA	NA	NA	NA	NA	NA
NA	reactome_HDL_mediated_lipid_transport_Main_Pathway	NA	NA	NA	NA	NA	NA	NA	NA	NA	NA	NA	NA	NA
NA	reactome_HDMs_demethylate_histones_Main_Pathway	NA	NA	NA	NA	NA	NA	NA	NA	NA	NA	NA	NA	NA
NA	reactome_Heme_biosynthesis_Main_Pathway	NA	NA	NA	NA	NA	NA	NA	NA	NA	NA	NA	NA	NA
NA	reactome_Heme_degradation_Main_Pathway	NA	NA	NA	NA	NA	NA	NA	NA	NA	NA	NA	NA	NA
NA	reactome_HIV_elongation_arrest_and_recovery_Main_Pathway	NA	NA	NA	NA	NA	NA	NA	NA	NA	NA	NA	NA	NA
NA	reactome_HIV_Transcription_Initiation_Main_Pathway	NA	NA	NA	NA	NA	NA	NA	NA	NA	NA	NA	NA	NA
NA	reactome_HS_GAG_biosynthesis_Main_Pathway	NA	NA	NA	NA	NA	NA	NA	NA	NA	NA	NA	NA	NA
NA	reactome_HS_GAG_degradation_Main_Pathway	NA	NA	NA	NA	NA	NA	NA	NA	NA	NA	NA	NA	NA
NA	reactome_HuR_stabilizes_mRNA_Main_Pathway	NA	NA	NA	NA	NA	NA	NA	NA	NA	NA	NA	NA	NA
NA	reactome_Hyaluronan_uptake_and_degradation_Main_Pathway	NA	NA	NA	NA	NA	NA	NA	NA	NA	NA	NA	NA	NA
NA	reactome_Hydrolysis_of_LPC_Main_Pathway	NA	NA	NA	NA	NA	NA	NA	NA	NA	NA	NA	NA	NA
NA	reactome_Inactivation_of_APC_C_via_direct_inhibition_of_the_APC_C_complex_Main_Pathway	NA	NA	NA	NA	NA	NA	NA	NA	NA	NA	NA	NA	NA
NA	reactome_Inactivation_of_Cdc42_and_Rac_Main_Pathway	NA	NA	NA	NA	NA	NA	NA	NA	NA	NA	NA	NA	NA
NA	reactome_Inhibition_of_replication_initiation_of_damaged_DNA_by_RB1_E2F1_Main_Pathway	NA	NA	NA	NA	NA	NA	NA	NA	NA	NA	NA	NA	NA
NA	reactome_Inhibition_of_TSC_complex_formation_by_PKB_Main_Pathway	NA	NA	NA	NA	NA	NA	NA	NA	NA	NA	NA	NA	NA
NA	reactome_Insulin_like_Growth_Factor_2_mRNA_Binding_Proteins_IGF2BPs_IMPs_VICKZs_bind_RNA_Main_Pathway	NA	NA	NA	NA	NA	NA	NA	NA	NA	NA	NA	NA	NA
NA	reactome_Integration_of_energy_metabolism_Main_Pathway	NA	NA	NA	NA	NA	NA	NA	NA	NA	NA	NA	NA	NA
NA	reactome_Integration_of_provirus_Main_Pathway	NA	NA	NA	NA	NA	NA	NA	NA	NA	NA	NA	NA	NA
NA	reactome_Integration_of_viral_DNA_into_host_genomic_DNA_Main_Pathway	NA	NA	NA	NA	NA	NA	NA	NA	NA	NA	NA	NA	NA
NA	reactome_Interleukin_1_signaling_Main_Pathway	NA	NA	NA	NA	NA	NA	NA	NA	NA	NA	NA	NA	NA
NA	reactome_Iron_uptake_and_transport_Main_Pathway	NA	NA	NA	NA	NA	NA	NA	NA	NA	NA	NA	NA	NA
NA	reactome_Kinesins_Main_Pathway	NA	NA	NA	NA	NA	NA	NA	NA	NA	NA	NA	NA	NA
NA	reactome_KSRP_destabilizes_mRNA_Main_Pathway	NA	NA	NA	NA	NA	NA	NA	NA	NA	NA	NA	NA	NA
NA	reactome_Leading_Strand_Synthesis_Main_Pathway	NA	NA	NA	NA	NA	NA	NA	NA	NA	NA	NA	NA	NA
NA	reactome_Linoleic_acid_LA_metabolism_Main_Pathway	NA	NA	NA	NA	NA	NA	NA	NA	NA	NA	NA	NA	NA
NA	reactome_Loss_of_Nlp_from_mitotic_centrosomes_Main_Pathway	NA	NA	NA	NA	NA	NA	NA	NA	NA	NA	NA	NA	NA
NA	reactome_Loss_of_proteins_required_for_interphase_microtubule_organizationA_from_the_centrosome_Main_Pathway	NA	NA	NA	NA	NA	NA	NA	NA	NA	NA	NA	NA	NA
NA	reactome_LRR_FLII_interacting_protein_1_LRRFIP1_activates_type_I_IFN_production_Main_Pathway	NA	NA	NA	NA	NA	NA	NA	NA	NA	NA	NA	NA	NA
NA	reactome_Meiotic_recombination_Main_Pathway	NA	NA	NA	NA	NA	NA	NA	NA	NA	NA	NA	NA	NA
NA	reactome_Meiotic_synapsis_Main_Pathway	NA	NA	NA	NA	NA	NA	NA	NA	NA	NA	NA	NA	NA
NA	reactome_Metabolism_of_folate_and_pterines_Main_Pathway	NA	NA	NA	NA	NA	NA	NA	NA	NA	NA	NA	NA	NA
NA	reactome_Metabolism_of_polyamines_Main_Pathway	NA	NA	NA	NA	NA	NA	NA	NA	NA	NA	NA	NA	NA
NA	reactome_Methylation_Main_Pathway	NA	NA	NA	NA	NA	NA	NA	NA	NA	NA	NA	NA	NA
NA	reactome_MHC_class_II_antigen_presentation_Main_Pathway	NA	NA	NA	NA	NA	NA	NA	NA	NA	NA	NA	NA	NA
NA	reactome_Mismatch_repair_MMR_directed_by_MSH2_MSH3_MutSbeta__Main_Pathway	NA	NA	NA	NA	NA	NA	NA	NA	NA	NA	NA	NA	NA
NA	reactome_Mismatch_repair_MMR_directed_by_MSH2_MSH6_MutSalpha__Main_Pathway	NA	NA	NA	NA	NA	NA	NA	NA	NA	NA	NA	NA	NA
NA	reactome_Mitochondrial_transcription_initiation_Main_Pathway	NA	NA	NA	NA	NA	NA	NA	NA	NA	NA	NA	NA	NA
NA	reactome_Mitochondrial_tRNA_aminoacylation_Main_Pathway	NA	NA	NA	NA	NA	NA	NA	NA	NA	NA	NA	NA	NA
NA	reactome_Mitotic_Prometaphase_Main_Pathway	NA	NA	NA	NA	NA	NA	NA	NA	NA	NA	NA	NA	NA
NA	reactome_Molybdenum_cofactor_biosynthesis_Main_Pathway	NA	NA	NA	NA	NA	NA	NA	NA	NA	NA	NA	NA	NA
NA	reactome_mRNA_3_end_processing_Main_Pathway	NA	NA	NA	NA	NA	NA	NA	NA	NA	NA	NA	NA	NA
NA	reactome_mRNA_Capping_Main_Pathway	NA	NA	NA	NA	NA	NA	NA	NA	NA	NA	NA	NA	NA
NA	reactome_mRNA_decay_by_3_to_5_exoribonuclease_Main_Pathway	NA	NA	NA	NA	NA	NA	NA	NA	NA	NA	NA	NA	NA
NA	reactome_mRNA_decay_by_5_to_3_exoribonuclease_Main_Pathway	NA	NA	NA	NA	NA	NA	NA	NA	NA	NA	NA	NA	NA
NA	reactome_Muscarinic_acetylcholine_receptors_Main_Pathway	NA	NA	NA	NA	NA	NA	NA	NA	NA	NA	NA	NA	NA
NA	reactome_NCAM_signaling_for_neurite_out_growth_Main_Pathway	NA	NA	NA	NA	NA	NA	NA	NA	NA	NA	NA	NA	NA
NA	reactome_negative_regulation_of_TCF_dependent_signaling_by_DVL_interacting_proteins_Main_Pathway	NA	NA	NA	NA	NA	NA	NA	NA	NA	NA	NA	NA	NA
NA	reactome_NEP_NS2_Interacts_with_the_Cellular_Export_Machinery_Main_Pathway	NA	NA	NA	NA	NA	NA	NA	NA	NA	NA	NA	NA	NA
NA	reactome_Netrin_mediated_repulsion_signals_Main_Pathway	NA	NA	NA	NA	NA	NA	NA	NA	NA	NA	NA	NA	NA
NA	reactome_NICD_traffics_to_nucleus_Main_Pathway	NA	NA	NA	NA	NA	NA	NA	NA	NA	NA	NA	NA	NA
NA	reactome_NOD1_2_Signaling_Pathway_Main_Pathway	NA	NA	NA	NA	NA	NA	NA	NA	NA	NA	NA	NA	NA
NA	reactome_Nonhomologous_End_joining_NHEJ__Main_Pathway	NA	NA	NA	NA	NA	NA	NA	NA	NA	NA	NA	NA	NA
NA	reactome_NoRC_negatively_regulates_rRNA_expression_Main_Pathway	NA	NA	NA	NA	NA	NA	NA	NA	NA	NA	NA	NA	NA
NA	reactome_Notch_HLH_transcription_Main_Pathway	NA	NA	NA	NA	NA	NA	NA	NA	NA	NA	NA	NA	NA
NA	reactome_NOTCH1_Intracellular_Domain_Regulates_Transcription_Main_Pathway	NA	NA	NA	NA	NA	NA	NA	NA	NA	NA	NA	NA	NA
NA	reactome_NOTCH2_intracellular_domain_regulates_transcription_Main_Pathway	NA	NA	NA	NA	NA	NA	NA	NA	NA	NA	NA	NA	NA
NA	reactome_NRIF_signals_cell_death_from_the_nucleus_Main_Pathway	NA	NA	NA	NA	NA	NA	NA	NA	NA	NA	NA	NA	NA
NA	reactome_Nuclear_import_of_Rev_protein_Main_Pathway	NA	NA	NA	NA	NA	NA	NA	NA	NA	NA	NA	NA	NA
NA	reactome_Nuclear_Pore_Complex_NPC_Disassembly_Main_Pathway	NA	NA	NA	NA	NA	NA	NA	NA	NA	NA	NA	NA	NA
NA	reactome_Nuclear_Receptor_transcription_Main_Pathway	NA	NA	NA	NA	NA	NA	NA	NA	NA	NA	NA	NA	NA
NA	reactome_O_linked_glycosylation_of_mucins_Main_Pathway	NA	NA	NA	NA	NA	NA	NA	NA	NA	NA	NA	NA	NA
NA	reactome_Orc1_removal_from_chromatin_Main_Pathway	NA	NA	NA	NA	NA	NA	NA	NA	NA	NA	NA	NA	NA
NA	reactome_P2Y_receptors_Main_Pathway	NA	NA	NA	NA	NA	NA	NA	NA	NA	NA	NA	NA	NA
NA	reactome_p53_Dependent_G1_DNA_Damage_Response_Main_Pathway	NA	NA	NA	NA	NA	NA	NA	NA	NA	NA	NA	NA	NA
NA	reactome_p75NTR_negatively_regulates_cell_cycle_via_SC1_Main_Pathway	NA	NA	NA	NA	NA	NA	NA	NA	NA	NA	NA	NA	NA
NA	reactome_Packaging_Of_Telomere_Ends_Main_Pathway	NA	NA	NA	NA	NA	NA	NA	NA	NA	NA	NA	NA	NA
NA	reactome_Pausing_and_recovery_of_HIV_elongation_Main_Pathway	NA	NA	NA	NA	NA	NA	NA	NA	NA	NA	NA	NA	NA
NA	reactome_Pausing_and_recovery_of_Tat_mediated_HIV_elongation_Main_Pathway	NA	NA	NA	NA	NA	NA	NA	NA	NA	NA	NA	NA	NA
NA	reactome_PCP_CE_Main_Pathway	NA	NA	NA	NA	NA	NA	NA	NA	NA	NA	NA	NA	NA
NA	reactome_Pentose_phosphate_pathway_hexose_monophosphate_shunt__Main_Pathway	NA	NA	NA	NA	NA	NA	NA	NA	NA	NA	NA	NA	NA
NA	reactome_Phosphate_bond_hydrolysis_by_NUDT_proteins_Main_Pathway	NA	NA	NA	NA	NA	NA	NA	NA	NA	NA	NA	NA	NA
NA	reactome_Phosphorylation_of_Emi1_Main_Pathway	NA	NA	NA	NA	NA	NA	NA	NA	NA	NA	NA	NA	NA
NA	reactome_Phosphorylation_of_proteins_involved_in_G1_S_transition_by_active_Cyclin_E_Cdk2_complexes_Main_Pathway	NA	NA	NA	NA	NA	NA	NA	NA	NA	NA	NA	NA	NA
NA	reactome_Phosphorylation_of_proteins_involved_in_the_G2_M_transition_by_Cyclin_A_Cdc2_complexes_Main_Pathway	NA	NA	NA	NA	NA	NA	NA	NA	NA	NA	NA	NA	NA
NA	reactome_Phosphorylation_of_the_APC_C_Main_Pathway	NA	NA	NA	NA	NA	NA	NA	NA	NA	NA	NA	NA	NA
NA	reactome_PLC_gamma1_signalling_Main_Pathway	NA	NA	NA	NA	NA	NA	NA	NA	NA	NA	NA	NA	NA
NA	reactome_Polo_like_kinase_mediated_events_Main_Pathway	NA	NA	NA	NA	NA	NA	NA	NA	NA	NA	NA	NA	NA
NA	reactome_Polymerase_switching_Main_Pathway	NA	NA	NA	NA	NA	NA	NA	NA	NA	NA	NA	NA	NA
NA	reactome_Polymerase_switching_on_the_C_strand_of_the_telomere_Main_Pathway	NA	NA	NA	NA	NA	NA	NA	NA	NA	NA	NA	NA	NA
NA	reactome_Post_transcriptional_silencing_by_small_RNAs_Main_Pathway	NA	NA	NA	NA	NA	NA	NA	NA	NA	NA	NA	NA	NA
NA	reactome_PP2A_mediated_dephosphorylation_of_key_metabolic_factors_Main_Pathway	NA	NA	NA	NA	NA	NA	NA	NA	NA	NA	NA	NA	NA
NA	reactome_PPARA_activates_gene_expression_Main_Pathway	NA	NA	NA	NA	NA	NA	NA	NA	NA	NA	NA	NA	NA
NA	reactome_PRC2_methylates_histones_and_DNA_Main_Pathway	NA	NA	NA	NA	NA	NA	NA	NA	NA	NA	NA	NA	NA
NA	reactome_pre_mRNA_splicing_Main_Pathway	NA	NA	NA	NA	NA	NA	NA	NA	NA	NA	NA	NA	NA
NA	reactome_Prefoldin_mediated_transfer_of_substrate_to_CCT_TriC_Main_Pathway	NA	NA	NA	NA	NA	NA	NA	NA	NA	NA	NA	NA	NA
NA	reactome_Presynaptic_phase_of_homologous_DNA_pairing_and_strand_exchange_Main_Pathway	NA	NA	NA	NA	NA	NA	NA	NA	NA	NA	NA	NA	NA
NA	reactome_Processing_of_Capped_Intron_Containing_Pre_mRNA_Main_Pathway	NA	NA	NA	NA	NA	NA	NA	NA	NA	NA	NA	NA	NA
NA	reactome_Processing_of_DNA_double_strand_break_ends_Main_Pathway	NA	NA	NA	NA	NA	NA	NA	NA	NA	NA	NA	NA	NA
NA	reactome_Processing_of_DNA_ends_prior_to_end_rejoining_Main_Pathway	NA	NA	NA	NA	NA	NA	NA	NA	NA	NA	NA	NA	NA
NA	reactome_Processing_of_Intronless_Pre_mRNAs_Main_Pathway	NA	NA	NA	NA	NA	NA	NA	NA	NA	NA	NA	NA	NA
NA	reactome_Processive_synthesis_on_the_C_strand_of_the_telomere_Main_Pathway	NA	NA	NA	NA	NA	NA	NA	NA	NA	NA	NA	NA	NA
NA	reactome_Processive_synthesis_on_the_lagging_strand_Main_Pathway	NA	NA	NA	NA	NA	NA	NA	NA	NA	NA	NA	NA	NA
NA	reactome_Prostanoid_ligand_receptors_Main_Pathway	NA	NA	NA	NA	NA	NA	NA	NA	NA	NA	NA	NA	NA
NA	reactome_Proton_coupled_monocarboxylate_transport_Main_Pathway	NA	NA	NA	NA	NA	NA	NA	NA	NA	NA	NA	NA	NA
NA	reactome_Purine_ribonucleoside_monophosphate_biosynthesis_Main_Pathway	NA	NA	NA	NA	NA	NA	NA	NA	NA	NA	NA	NA	NA
NA	reactome_Purine_salvage_Main_Pathway	NA	NA	NA	NA	NA	NA	NA	NA	NA	NA	NA	NA	NA
NA	reactome_Pyrimidine_biosynthesis_Main_Pathway	NA	NA	NA	NA	NA	NA	NA	NA	NA	NA	NA	NA	NA
NA	reactome_Pyrimidine_salvage_reactions_Main_Pathway	NA	NA	NA	NA	NA	NA	NA	NA	NA	NA	NA	NA	NA
NA	reactome_Recognition_and_association_of_DNA_glycosylase_with_site_containing_an_affected_purine_Main_Pathway	NA	NA	NA	NA	NA	NA	NA	NA	NA	NA	NA	NA	NA
NA	reactome_Recruitment_of_mitotic_centrosome_proteins_and_complexes_Main_Pathway	NA	NA	NA	NA	NA	NA	NA	NA	NA	NA	NA	NA	NA
NA	reactome_Recruitment_of_NuMA_to_mitotic_centrosomes_Main_Pathway	NA	NA	NA	NA	NA	NA	NA	NA	NA	NA	NA	NA	NA
NA	reactome_Recruitment_of_repair_and_signaling_proteins_to_double_strand_breaks_Main_Pathway	NA	NA	NA	NA	NA	NA	NA	NA	NA	NA	NA	NA	NA
NA	reactome_Regulation_of_APC_C_activators_between_G1_S_and_early_anaphase_Main_Pathway	NA	NA	NA	NA	NA	NA	NA	NA	NA	NA	NA	NA	NA
NA	reactome_Regulation_of_Commissural_axon_pathfinding_by_Slit_and_Robo_Main_Pathway	NA	NA	NA	NA	NA	NA	NA	NA	NA	NA	NA	NA	NA
NA	reactome_Regulation_of_gene_expression_by_Hypoxia_inducible_Factor_Main_Pathway	NA	NA	NA	NA	NA	NA	NA	NA	NA	NA	NA	NA	NA
NA	reactome_Regulation_of_Glucokinase_by_Glucokinase_Regulatory_Protein_Main_Pathway	NA	NA	NA	NA	NA	NA	NA	NA	NA	NA	NA	NA	NA
NA	reactome_Regulation_of_lipid_metabolism_by_Peroxisome_proliferator_activated_receptor_alpha_PPARalpha__Main_Pathway	NA	NA	NA	NA	NA	NA	NA	NA	NA	NA	NA	NA	NA
NA	reactome_Regulation_of_ornithine_decarboxylase_ODC__Main_Pathway	NA	NA	NA	NA	NA	NA	NA	NA	NA	NA	NA	NA	NA
NA	reactome_Regulation_of_PLK1_Activity_at_G2_M_Transition_Main_Pathway	NA	NA	NA	NA	NA	NA	NA	NA	NA	NA	NA	NA	NA
NA	reactome_Regulation_of_pyruvate_dehydrogenase_PDH_complex_Main_Pathway	NA	NA	NA	NA	NA	NA	NA	NA	NA	NA	NA	NA	NA
NA	reactome_Regulation_of_the_Fanconi_anemia_Main_Pathway	NA	NA	NA	NA	NA	NA	NA	NA	NA	NA	NA	NA	NA
NA	reactome_Release_of_eIF4E_Main_Pathway	NA	NA	NA	NA	NA	NA	NA	NA	NA	NA	NA	NA	NA
NA	reactome_Removal_of_DNA_patch_containing_abasic_residue_Main_Pathway	NA	NA	NA	NA	NA	NA	NA	NA	NA	NA	NA	NA	NA
NA	reactome_Removal_of_the_Flap_Intermediate_from_the_C_strand_Main_Pathway	NA	NA	NA	NA	NA	NA	NA	NA	NA	NA	NA	NA	NA
NA	reactome_Removal_of_the_Flap_Intermediate_Main_Pathway	NA	NA	NA	NA	NA	NA	NA	NA	NA	NA	NA	NA	NA
NA	reactome_Repair_synthesis_for_gap_filling_by_DNA_polymerase_in_TC_NER_Main_Pathway	NA	NA	NA	NA	NA	NA	NA	NA	NA	NA	NA	NA	NA
NA	reactome_Repair_synthesis_of_patch_27_30_bases_long_by_DNA_polymerase_Main_Pathway	NA	NA	NA	NA	NA	NA	NA	NA	NA	NA	NA	NA	NA
NA	reactome_repression_of_WNT_target_genes_Main_Pathway	NA	NA	NA	NA	NA	NA	NA	NA	NA	NA	NA	NA	NA
NA	reactome_Resolution_of_AP_sites_via_the_multiple_nucleotide_patch_replacement_Main_Pathway	NA	NA	NA	NA	NA	NA	NA	NA	NA	NA	NA	NA	NA
NA	reactome_Resolution_of_AP_sites_via_the_single_nucleotide_replacement_Main_Pathway	NA	NA	NA	NA	NA	NA	NA	NA	NA	NA	NA	NA	NA
NA	reactome_Resolution_of_Sister_Chromatid_Cohesion_Main_Pathway	NA	NA	NA	NA	NA	NA	NA	NA	NA	NA	NA	NA	NA
NA	reactome_Response_to_elevated_platelet_cytosolic_Ca2__Main_Pathway	NA	NA	NA	NA	NA	NA	NA	NA	NA	NA	NA	NA	NA
NA	reactome_Retinoid_metabolism_and_transport_Main_Pathway	NA	NA	NA	NA	NA	NA	NA	NA	NA	NA	NA	NA	NA
NA	reactome_Rev_mediated_nuclear_export_of_HIV_RNA_Main_Pathway	NA	NA	NA	NA	NA	NA	NA	NA	NA	NA	NA	NA	NA
NA	reactome_Rho_GTPase_cycle_Main_Pathway	NA	NA	NA	NA	NA	NA	NA	NA	NA	NA	NA	NA	NA
NA	reactome_RMTs_methylate_histone_arginines_Main_Pathway	NA	NA	NA	NA	NA	NA	NA	NA	NA	NA	NA	NA	NA
NA	reactome_RNA_Pol_II_CTD_phosphorylation_and_interaction_with_CE_Main_Pathway	NA	NA	NA	NA	NA	NA	NA	NA	NA	NA	NA	NA	NA
NA	reactome_RNA_Polymerase_I_Chain_Elongation_Main_Pathway	NA	NA	NA	NA	NA	NA	NA	NA	NA	NA	NA	NA	NA
NA	reactome_RNA_Polymerase_I_Promoter_Escape_Main_Pathway	NA	NA	NA	NA	NA	NA	NA	NA	NA	NA	NA	NA	NA
NA	reactome_RNA_Polymerase_I_Transcription_Initiation_Main_Pathway	NA	NA	NA	NA	NA	NA	NA	NA	NA	NA	NA	NA	NA
NA	reactome_RNA_Polymerase_I_Transcription_Termination_Main_Pathway	NA	NA	NA	NA	NA	NA	NA	NA	NA	NA	NA	NA	NA
NA	reactome_RNA_Polymerase_II_HIV_Promoter_Escape_Main_Pathway	NA	NA	NA	NA	NA	NA	NA	NA	NA	NA	NA	NA	NA
NA	reactome_RNA_Polymerase_II_Pre_transcription_Events_Main_Pathway	NA	NA	NA	NA	NA	NA	NA	NA	NA	NA	NA	NA	NA
NA	reactome_RNA_Polymerase_II_Promoter_Escape_Main_Pathway	NA	NA	NA	NA	NA	NA	NA	NA	NA	NA	NA	NA	NA
NA	reactome_RNA_Polymerase_II_Transcription_Elongation_Main_Pathway	NA	NA	NA	NA	NA	NA	NA	NA	NA	NA	NA	NA	NA
NA	reactome_RNA_Polymerase_II_Transcription_Initiation_And_Promoter_Clearance_Main_Pathway	NA	NA	NA	NA	NA	NA	NA	NA	NA	NA	NA	NA	NA
NA	reactome_RNA_Polymerase_II_Transcription_Initiation_Main_Pathway	NA	NA	NA	NA	NA	NA	NA	NA	NA	NA	NA	NA	NA
NA	reactome_RNA_Polymerase_II_Transcription_Pre_Initiation_And_Promoter_Opening_Main_Pathway	NA	NA	NA	NA	NA	NA	NA	NA	NA	NA	NA	NA	NA
NA	reactome_RNA_Polymerase_III_Abortive_And_Retractive_Initiation_Main_Pathway	NA	NA	NA	NA	NA	NA	NA	NA	NA	NA	NA	NA	NA
NA	reactome_RNA_Polymerase_III_Transcription_Initiation_From_Type_1_Promoter_Main_Pathway	NA	NA	NA	NA	NA	NA	NA	NA	NA	NA	NA	NA	NA
NA	reactome_RNA_Polymerase_III_Transcription_Initiation_From_Type_2_Promoter_Main_Pathway	NA	NA	NA	NA	NA	NA	NA	NA	NA	NA	NA	NA	NA
NA	reactome_RNA_Polymerase_III_Transcription_Termination_Main_Pathway	NA	NA	NA	NA	NA	NA	NA	NA	NA	NA	NA	NA	NA
NA	reactome_Role_of_Abl_in_Robo_Slit_signaling_Main_Pathway	NA	NA	NA	NA	NA	NA	NA	NA	NA	NA	NA	NA	NA
NA	reactome_Role_of_second_messengers_in_netrin_1_signaling_Main_Pathway	NA	NA	NA	NA	NA	NA	NA	NA	NA	NA	NA	NA	NA
NA	reactome_S6K1_signalling_Main_Pathway	NA	NA	NA	NA	NA	NA	NA	NA	NA	NA	NA	NA	NA
NA	reactome_Scavenging_by_Class_F_Receptors_Main_Pathway	NA	NA	NA	NA	NA	NA	NA	NA	NA	NA	NA	NA	NA
NA	reactome_SCF_Skp2_mediated_degradation_of_p27_p21_Main_Pathway	NA	NA	NA	NA	NA	NA	NA	NA	NA	NA	NA	NA	NA
NA	reactome_Sema3A_PAK_dependent_Axon_repulsion_Main_Pathway	NA	NA	NA	NA	NA	NA	NA	NA	NA	NA	NA	NA	NA
NA	reactome_SEMA3A_Plexin_repulsion_signaling_by_inhibiting_Integrin_adhesion_Main_Pathway	NA	NA	NA	NA	NA	NA	NA	NA	NA	NA	NA	NA	NA
NA	reactome_Senescence_Associated_Secretory_Phenotype_SASP__Main_Pathway	NA	NA	NA	NA	NA	NA	NA	NA	NA	NA	NA	NA	NA
NA	reactome_Separation_of_Sister_Chromatids_Main_Pathway	NA	NA	NA	NA	NA	NA	NA	NA	NA	NA	NA	NA	NA
NA	reactome_Serine_biosynthesis_Main_Pathway	NA	NA	NA	NA	NA	NA	NA	NA	NA	NA	NA	NA	NA
NA	reactome_SHC_activation_Main_Pathway	NA	NA	NA	NA	NA	NA	NA	NA	NA	NA	NA	NA	NA
NA	reactome_Signaling_by_BMP_Main_Pathway	NA	NA	NA	NA	NA	NA	NA	NA	NA	NA	NA	NA	NA
NA	reactome_Signaling_by_FGFR1_fusion_mutants_Main_Pathway	NA	NA	NA	NA	NA	NA	NA	NA	NA	NA	NA	NA	NA
NA	reactome_Signaling_by_NODAL_Main_Pathway	NA	NA	NA	NA	NA	NA	NA	NA	NA	NA	NA	NA	NA
NA	reactome_Signaling_by_Robo_receptor_Main_Pathway	NA	NA	NA	NA	NA	NA	NA	NA	NA	NA	NA	NA	NA
NA	reactome_SIRT1_negatively_regulates_rRNA_Expression_Main_Pathway	NA	NA	NA	NA	NA	NA	NA	NA	NA	NA	NA	NA	NA
NA	reactome_SLBP_Dependent_Processing_of_Replication_Dependent_Histone_Pre_mRNAs_Main_Pathway	NA	NA	NA	NA	NA	NA	NA	NA	NA	NA	NA	NA	NA
NA	reactome_SLBP_independent_Processing_of_Histone_Pre_mRNAs_Main_Pathway	NA	NA	NA	NA	NA	NA	NA	NA	NA	NA	NA	NA	NA
NA	reactome_SMAD2_SMAD3_SMAD4_heterotrimer_regulates_transcription_Main_Pathway	NA	NA	NA	NA	NA	NA	NA	NA	NA	NA	NA	NA	NA
NA	reactome_snRNP_Assembly_Main_Pathway	NA	NA	NA	NA	NA	NA	NA	NA	NA	NA	NA	NA	NA
NA	reactome_Sodium_Proton_exchangers_Main_Pathway	NA	NA	NA	NA	NA	NA	NA	NA	NA	NA	NA	NA	NA
NA	reactome_STING_mediated_induction_of_host_immune_responses_Main_Pathway	NA	NA	NA	NA	NA	NA	NA	NA	NA	NA	NA	NA	NA
NA	reactome_Sulfur_amino_acid_metabolism_Main_Pathway	NA	NA	NA	NA	NA	NA	NA	NA	NA	NA	NA	NA	NA
NA	reactome_SUMO_is_conjugated_to_E1_UBA2_SAE1__Main_Pathway	NA	NA	NA	NA	NA	NA	NA	NA	NA	NA	NA	NA	NA
NA	reactome_SUMO_is_proteolytically_processed_Main_Pathway	NA	NA	NA	NA	NA	NA	NA	NA	NA	NA	NA	NA	NA
NA	reactome_SUMO_is_transferred_from_E1_to_E2_UBE2I_UBC9__Main_Pathway	NA	NA	NA	NA	NA	NA	NA	NA	NA	NA	NA	NA	NA
NA	reactome_Switching_of_origins_to_a_post_replicative_state_Main_Pathway	NA	NA	NA	NA	NA	NA	NA	NA	NA	NA	NA	NA	NA
NA	reactome_Synthesis_of_16_20_hydroxyeicosatetraenoic_acids_HETE__Main_Pathway	NA	NA	NA	NA	NA	NA	NA	NA	NA	NA	NA	NA	NA
NA	reactome_Synthesis_of_bile_acids_and_bile_salts_via_24_hydroxycholesterol_Main_Pathway	NA	NA	NA	NA	NA	NA	NA	NA	NA	NA	NA	NA	NA
NA	reactome_Synthesis_of_bile_acids_and_bile_salts_via_27_hydroxycholesterol_Main_Pathway	NA	NA	NA	NA	NA	NA	NA	NA	NA	NA	NA	NA	NA
NA	reactome_Synthesis_of_bile_acids_and_bile_salts_via_7alpha_hydroxycholesterol_Main_Pathway	NA	NA	NA	NA	NA	NA	NA	NA	NA	NA	NA	NA	NA
NA	reactome_Synthesis_of_epoxy_EET_and_dihydroxyeicosatrienoic_acids_DHET__Main_Pathway	NA	NA	NA	NA	NA	NA	NA	NA	NA	NA	NA	NA	NA
NA	reactome_Synthesis_of_PA_Main_Pathway	NA	NA	NA	NA	NA	NA	NA	NA	NA	NA	NA	NA	NA
NA	reactome_Synthesis_of_PE_Main_Pathway	NA	NA	NA	NA	NA	NA	NA	NA	NA	NA	NA	NA	NA
NA	reactome_Synthesis_of_PIPs_at_the_early_endosome_membrane_Main_Pathway	NA	NA	NA	NA	NA	NA	NA	NA	NA	NA	NA	NA	NA
NA	reactome_Synthesis_of_PIPs_at_the_Golgi_membrane_Main_Pathway	NA	NA	NA	NA	NA	NA	NA	NA	NA	NA	NA	NA	NA
NA	reactome_Synthesis_of_PIPs_at_the_late_endosome_membrane_Main_Pathway	NA	NA	NA	NA	NA	NA	NA	NA	NA	NA	NA	NA	NA
NA	reactome_Synthesis_of_very_long_chain_fatty_acyl_CoAs_Main_Pathway	NA	NA	NA	NA	NA	NA	NA	NA	NA	NA	NA	NA	NA
NA	reactome_Tat_mediated_elongation_of_the_HIV_1_transcript_Main_Pathway	NA	NA	NA	NA	NA	NA	NA	NA	NA	NA	NA	NA	NA
NA	reactome_Tat_mediated_HIV_elongation_arrest_and_recovery_Main_Pathway	NA	NA	NA	NA	NA	NA	NA	NA	NA	NA	NA	NA	NA
NA	reactome_Telomere_C_strand_Lagging_Strand_Synthesis_Main_Pathway	NA	NA	NA	NA	NA	NA	NA	NA	NA	NA	NA	NA	NA
NA	reactome_Telomere_C_strand_synthesis_initiation_Main_Pathway	NA	NA	NA	NA	NA	NA	NA	NA	NA	NA	NA	NA	NA
NA	reactome_Telomere_Extension_By_Telomerase_Main_Pathway	NA	NA	NA	NA	NA	NA	NA	NA	NA	NA	NA	NA	NA
NA	reactome_Termination_of_O_glycan_biosynthesis_Main_Pathway	NA	NA	NA	NA	NA	NA	NA	NA	NA	NA	NA	NA	NA
NA	reactome_Toll_Like_Receptor_9_TLR9_Cascade_Main_Pathway	NA	NA	NA	NA	NA	NA	NA	NA	NA	NA	NA	NA	NA
NA	reactome_Toxicity_of_botulinum_toxin_type_A_BoNT_A__Main_Pathway	NA	NA	NA	NA	NA	NA	NA	NA	NA	NA	NA	NA	NA
NA	reactome_Toxicity_of_botulinum_toxin_type_C_BoNT_C__Main_Pathway	NA	NA	NA	NA	NA	NA	NA	NA	NA	NA	NA	NA	NA
NA	reactome_Toxicity_of_botulinum_toxin_type_D_BoNT_D__Main_Pathway	NA	NA	NA	NA	NA	NA	NA	NA	NA	NA	NA	NA	NA
NA	reactome_Toxicity_of_botulinum_toxin_type_E_BoNT_E__Main_Pathway	NA	NA	NA	NA	NA	NA	NA	NA	NA	NA	NA	NA	NA
NA	reactome_Toxicity_of_botulinum_toxin_type_F_BoNT_F__Main_Pathway	NA	NA	NA	NA	NA	NA	NA	NA	NA	NA	NA	NA	NA
NA	reactome_Transcription_coupled_NER_TC_NER__Main_Pathway	NA	NA	NA	NA	NA	NA	NA	NA	NA	NA	NA	NA	NA
NA	reactome_Transcription_of_the_HIV_genome_Main_Pathway	NA	NA	NA	NA	NA	NA	NA	NA	NA	NA	NA	NA	NA
NA	reactome_Transcriptional_activation_of_mitochondrial_biogenesis_Main_Pathway	NA	NA	NA	NA	NA	NA	NA	NA	NA	NA	NA	NA	NA
NA	reactome_Transcriptional_regulation_of_white_adipocyte_differentiation_Main_Pathway	NA	NA	NA	NA	NA	NA	NA	NA	NA	NA	NA	NA	NA
NA	reactome_Transport_of_Mature_mRNA_derived_from_an_Intron_Containing_Transcript_Main_Pathway	NA	NA	NA	NA	NA	NA	NA	NA	NA	NA	NA	NA	NA
NA	reactome_Transport_of_Mature_mRNA_Derived_from_an_Intronless_Transcript_Main_Pathway	NA	NA	NA	NA	NA	NA	NA	NA	NA	NA	NA	NA	NA
NA	reactome_Transport_of_Ribonucleoproteins_into_the_Host_Nucleus_Main_Pathway	NA	NA	NA	NA	NA	NA	NA	NA	NA	NA	NA	NA	NA
NA	reactome_Transport_of_the_SLBP_Dependant_Mature_mRNA_Main_Pathway	NA	NA	NA	NA	NA	NA	NA	NA	NA	NA	NA	NA	NA
NA	reactome_Transport_of_the_SLBP_independent_Mature_mRNA_Main_Pathway	NA	NA	NA	NA	NA	NA	NA	NA	NA	NA	NA	NA	NA
NA	reactome_Transport_of_vitamins_nucleosides_and_related_molecules_Main_Pathway	NA	NA	NA	NA	NA	NA	NA	NA	NA	NA	NA	NA	NA
NA	reactome_Triglyceride_Biosynthesis_Main_Pathway	NA	NA	NA	NA	NA	NA	NA	NA	NA	NA	NA	NA	NA
NA	reactome_Tristetraprolin_TTP_destabilizes_mRNA_Main_Pathway	NA	NA	NA	NA	NA	NA	NA	NA	NA	NA	NA	NA	NA
NA	reactome_TRP_channels_Main_Pathway	NA	NA	NA	NA	NA	NA	NA	NA	NA	NA	NA	NA	NA
NA	reactome_Tryptophan_catabolism_Main_Pathway	NA	NA	NA	NA	NA	NA	NA	NA	NA	NA	NA	NA	NA
NA	reactome_TWIK_related_potassium_channel_TREK__Main_Pathway	NA	NA	NA	NA	NA	NA	NA	NA	NA	NA	NA	NA	NA
NA	reactome_U12_Dependent_Splicing_Main_Pathway	NA	NA	NA	NA	NA	NA	NA	NA	NA	NA	NA	NA	NA
NA	reactome_Ubiquinol_biosynthesis_Main_Pathway	NA	NA	NA	NA	NA	NA	NA	NA	NA	NA	NA	NA	NA
NA	reactome_Unwinding_of_DNA_Main_Pathway	NA	NA	NA	NA	NA	NA	NA	NA	NA	NA	NA	NA	NA
NA	reactome_Urea_cycle_Main_Pathway	NA	NA	NA	NA	NA	NA	NA	NA	NA	NA	NA	NA	NA
NA	reactome_Viral_Messenger_RNA_Synthesis_Main_Pathway	NA	NA	NA	NA	NA	NA	NA	NA	NA	NA	NA	NA	NA
NA	reactome_Vitamin_B2_riboflavin_metabolism_Main_Pathway	NA	NA	NA	NA	NA	NA	NA	NA	NA	NA	NA	NA	NA
NA	reactome_Vitamin_B5_pantothenate_metabolism_Main_Pathway	NA	NA	NA	NA	NA	NA	NA	NA	NA	NA	NA	NA	NA
NA	reactome_Vpr_mediated_nuclear_import_of_PICs_Main_Pathway	NA	NA	NA	NA	NA	NA	NA	NA	NA	NA	NA	NA	NA
NA	reactome_WNT_mediated_activation_of_DVL_Main_Pathway	NA	NA	NA	NA	NA	NA	NA	NA	NA	NA	NA	NA	NA
NA	reactome_WNT5A_dependent_internalization_of_FZD2_FZD5_and_ROR2_Main_Pathway	NA	NA	NA	NA	NA	NA	NA	NA	NA	NA	NA	NA	NA
NA	reactome_WNT5A_dependent_internalization_of_FZD4_Main_Pathway	NA	NA	NA	NA	NA	NA	NA	NA	NA	NA	NA	NA	NA
NA	reactome_XAV939_inhibits_tankyrase_stabilizing_AXIN_Main_Pathway	NA	NA	NA	NA	NA	NA	NA	NA	NA	NA	NA	NA	NA
NA	STAT3_Pathway_G1_to_S_Cell_Cycle_Progression	NA	NA	NA	NA	NA	NA	NA	NA	NA	NA	NA	NA	NA
NA	TNF_Signaling_Pathway	NA	NA	NA	NA	NA	NA	NA	NA	NA	NA	NA	NA	NA
NA	TNF_Signaling_Pathway_Apoptosis	NA	NA	NA	NA	NA	NA	NA	NA	NA	NA	NA	NA	NA
NA	Ubiquitin-Proteasome_Dependent_Proteolysis_Pathway	NA	NA	NA	NA	NA	NA	NA	NA	NA	NA	NA	NA	NA
NA	VEGF_Pathway_Cell_Survival	NA	NA	NA	NA	NA	NA	NA	NA	NA	NA	NA	NA	NA
NA	VEGF_Pathway_Gene_Expression_and_Cell_Proliferation_via_MAPK7	NA	NA	NA	NA	NA	NA	NA	NA	NA	NA	NA	NA	NA
NA	VEGF_Pathway_Prostaglandin_Production	NA	NA	NA	NA	NA	NA	NA	NA	NA	NA	NA	NA	NA
NA	WNT_Pathway_Cell_Survival	NA	NA	NA	NA	NA	NA	NA	NA	NA	NA	NA	NA	NA

## Sheet: GSE59861_3h_GSE55118
X1_sets_GSE55118_middle_vs_young	X1_sets_GSE55118_old_vs_young	X1_sets_GSE59861_3h_2Gy	X1_sets_GSE59861_3h_5cGy	X2_sets_GSE55118_middle_vs_young_GSE55118_old_vs_young	X2_sets_GSE55118_middle_vs_young_GSE59861_3h_2Gy	X2_sets_GSE55118_middle_vs_young_GSE59861_3h_5cGy	X2_sets_GSE55118_old_vs_young_GSE59861_3h_2Gy	X2_sets_GSE55118_old_vs_young_GSE59861_3h_5cGy	X2_sets_GSE59861_3h_2Gy_GSE59861_3h_5cGy	X3_sets_GSE55118_middle_vs_young_GSE55118_old_vs_young_GSE59861_3h_2Gy	X3_sets_GSE55118_middle_vs_young_GSE55118_old_vs_young_GSE59861_3h_5cGy	X3_sets_GSE55118_middle_vs_young_GSE59861_3h_2Gy_GSE59861_3h_5cGy	X3_sets_GSE55118_old_vs_young_GSE59861_3h_2Gy_GSE59861_3h_5cGy	X4_sets_GSE55118_middle_vs_young_GSE55118_old_vs_young_GSE59861_3h_2Gy_GSE59861_3h_5cGy
Estrogen_Pathway_Vasodilatation	NCI_Caspase_Cascade_in_Apoptosis_Pathway_(apoptotic_nuclear_changes)	EGF_Pathway_Rab5_Regulation_Pathway	NA	PAK_Pathway_Paxillin_Disassembly	NA	NA	NA	NA	NA	NA	NA	NA	NA	NA
NCI_Arf6_downstream_Pathway_(actin_filament_bundle_formation)	NCI_Ephrin_A_reverse_signaling_Pathway_(MAPKKK_cascade)	HIF1Alpha_Pathway_NOS_Pathway	NA	NA	NA	NA	NA	NA	NA	NA	NA	NA	NA	NA
NCI_Arf6_downstream_Pathway_(Tumor_Cell_Invasion)	NCI_Ephrin_A_reverse_signaling_Pathway_(neuron_projection_morphogenesis)	HIF1Alpha_Pathway_p53_Hypoxia_Pathway	NA	NA	NA	NA	NA	NA	NA	NA	NA	NA	NA	NA
NCI_LKB1_signaling_events_Pathway_(chromatin_remodeling)	NCI_PLK1_signaling_events_Pathway_(chromosome_segregation)	HIF1Alpha_Pathway_VEGF_Pathway	NA	NA	NA	NA	NA	NA	NA	NA	NA	NA	NA	NA
NCI_Signaling_events_mediated_by_Stem_cell_factor_receptor_c_Kit__Pathway_(Pathway_positive_regulation_of_transcription_via_MAPK3)	NCI_PLK1_signaling_events_Pathway_(Golgi_organization)	KEGG_D_Glutamine_and_D_glutamate_metabolism_Main_Pathway	NA	NA	NA	NA	NA	NA	NA	NA	NA	NA	NA	NA
PAK_Pathway_Paxillin_Disassembly	NCI_PLK1_signaling_events_Pathway_(regulation_of_mitotic_centrosome_separation)	KEGG_Prion_diseases_Main_Pathway	NA	NA	NA	NA	NA	NA	NA	NA	NA	NA	NA	NA
reactome_p53_Dependent_G1_DNA_Damage_Response_Main_Pathway	NCI_PLK1_signaling_events_Pathway_(spindle_elongation)	KEGG_Proximal_tubule_bicarbonate_reclamation_Main_Pathway	NA	NA	NA	NA	NA	NA	NA	NA	NA	NA	NA	NA
NA	NCI_PLK1_signaling_events_Pathway_(spindle_stabilization)	NCI_Arf6_trafficking_events_Pathway_(regulation_of_calcium_dependent_cell_cell_adhesion)	NA	NA	NA	NA	NA	NA	NA	NA	NA	NA	NA	NA
NA	NCI_Regulation_of_Androgen_receptor_activity_Pathway_(Pathway_positive_regulation_of_transcription_via_GATA2)	NCI_E_cadherin_signaling_in_the_nascent_adherens_junction_Pathway_(regulation_of_calcium_dependent_cell_cell_adhesion)	NA	NA	NA	NA	NA	NA	NA	NA	NA	NA	NA	NA
NA	PAK_Pathway_Paxillin_Disassembly	NCI_Endogenous_TLR_signaling_Pathway_(regulation_of_cell_adhesion)	NA	NA	NA	NA	NA	NA	NA	NA	NA	NA	NA	NA
NA	reactome_cell_division_Main_Pathway	NCI_FAS_CD95_signaling_Pathway_(cell_cycle)	NA	NA	NA	NA	NA	NA	NA	NA	NA	NA	NA	NA
NA	NA	NCI_Hypoxic_and_oxygen_homeostasis_regulation_of_HIF_1_alpha_Main_Pathway	NA	NA	NA	NA	NA	NA	NA	NA	NA	NA	NA	NA
NA	NA	NCI_IFN_gamma_Pathway_(Antibacterial_Response)	NA	NA	NA	NA	NA	NA	NA	NA	NA	NA	NA	NA
NA	NA	NCI_IFN_gamma_Pathway_(antigen_processing_and_presentation_of_peptide_antigen_via_MHC_class_I)	NA	NA	NA	NA	NA	NA	NA	NA	NA	NA	NA	NA
NA	NA	NCI_IFN_gamma_Pathway_(antigen_processing_and_presentation_of_peptide_antigen_via_MHC_class_II)	NA	NA	NA	NA	NA	NA	NA	NA	NA	NA	NA	NA
NA	NA	NCI_IFN_gamma_Pathway_(Antiviral_Response)	NA	NA	NA	NA	NA	NA	NA	NA	NA	NA	NA	NA
NA	NA	NCI_IFN_gamma_Pathway_(apoptosis)	NA	NA	NA	NA	NA	NA	NA	NA	NA	NA	NA	NA
NA	NA	NCI_IFN_gamma_Pathway_(Immunoregulation)	NA	NA	NA	NA	NA	NA	NA	NA	NA	NA	NA	NA
NA	NA	NCI_IFN_gamma_Pathway_(negative_regulation_of_cell_growth)	NA	NA	NA	NA	NA	NA	NA	NA	NA	NA	NA	NA
NA	NA	NCI_LPA_receptor_mediated_events_Pathway_(contractile_ring_contraction_involved_in_cytokinesis)	NA	NA	NA	NA	NA	NA	NA	NA	NA	NA	NA	NA
NA	NA	NCI_Posttranslational_regulation_of_adherens_junction_stability_and_dissassembly_Pathway_(axonogenesis)	NA	NA	NA	NA	NA	NA	NA	NA	NA	NA	NA	NA
NA	NA	NCI_Presenilin_action_in_Notch_and_Wnt_signaling_Main_Pathway	NA	NA	NA	NA	NA	NA	NA	NA	NA	NA	NA	NA
NA	NA	NCI_Presenilin_action_in_Notch_and_Wnt_signaling_Pathway_(Pathway_degradation_of_CTNNB1)	NA	NA	NA	NA	NA	NA	NA	NA	NA	NA	NA	NA
NA	NA	NCI_RAC1_signaling_Pathway_(positive_regulation_of_Wnt_receptor_signaling_pathway)	NA	NA	NA	NA	NA	NA	NA	NA	NA	NA	NA	NA
NA	NA	NCI_Regulation_of_nuclear_beta_catenin_signaling_and_target_gene_transcription_Main_Pathway	NA	NA	NA	NA	NA	NA	NA	NA	NA	NA	NA	NA
NA	NA	NCI_RhoA_signaling_Pathway_(actin_cytoskeleton_organization)	NA	NA	NA	NA	NA	NA	NA	NA	NA	NA	NA	NA
NA	NA	NCI_RhoA_signaling_Pathway_(Golgi_organization)	NA	NA	NA	NA	NA	NA	NA	NA	NA	NA	NA	NA
NA	NA	NCI_RhoA_signaling_Pathway_(Pathway_positive_regulation_of_NF_kappaB_transcription_factor_activity_via_RHOA)	NA	NA	NA	NA	NA	NA	NA	NA	NA	NA	NA	NA
NA	NA	NCI_Syndecan_2_mediated_signaling_events_Main_Pathway	NA	NA	NA	NA	NA	NA	NA	NA	NA	NA	NA	NA
NA	NA	NCI_Syndecan_2_mediated_signaling_events_Pathway_(positive_regulation_of_cell_cell_adhesion)	NA	NA	NA	NA	NA	NA	NA	NA	NA	NA	NA	NA
NA	NA	NCI_TGF_beta_receptor_signaling_Pathway_(JNK_cascade)	NA	NA	NA	NA	NA	NA	NA	NA	NA	NA	NA	NA
NA	NA	reactome_ATF6_alpha_activates_chaperone_genes_Main_Pathway	NA	NA	NA	NA	NA	NA	NA	NA	NA	NA	NA	NA
NA	NA	reactome_ATF6_alpha_activates_chaperones_Main_Pathway	NA	NA	NA	NA	NA	NA	NA	NA	NA	NA	NA	NA
NA	NA	reactome_binding_of_TCF_LEF_CTNNB1_to_target_gene_promoters_Main_Pathway	NA	NA	NA	NA	NA	NA	NA	NA	NA	NA	NA	NA
NA	NA	reactome_PERK_regulates_gene_expression_Main_Pathway	NA	NA	NA	NA	NA	NA	NA	NA	NA	NA	NA	NA
NA	NA	reactome_S6K1_signalling_Main_Pathway	NA	NA	NA	NA	NA	NA	NA	NA	NA	NA	NA	NA
NA	NA	WNT_Pathway_Cytoskeletal_Rearrangement	NA	NA	NA	NA	NA	NA	NA	NA	NA	NA	NA	NA

## Sheet: GSE59861_6h_EMTAB2086
X1_sets_EMTAB2086_70_vs_30	X1_sets_EMTAB2086_80_vs_30	X1_sets_GSE59861_6h_2Gy	X1_sets_GSE59861_6h_5cGy	X2_sets_EMTAB2086_70_vs_30_EMTAB2086_80_vs_30	X2_sets_EMTAB2086_70_vs_30_GSE59861_6h_2Gy	X2_sets_EMTAB2086_70_vs_30_GSE59861_6h_5cGy	X2_sets_EMTAB2086_80_vs_30_GSE59861_6h_2Gy	X2_sets_EMTAB2086_80_vs_30_GSE59861_6h_5cGy	X2_sets_GSE59861_6h_2Gy_GSE59861_6h_5cGy	X3_sets_EMTAB2086_70_vs_30_EMTAB2086_80_vs_30_GSE59861_6h_2Gy	X3_sets_EMTAB2086_70_vs_30_EMTAB2086_80_vs_30_GSE59861_6h_5cGy	X3_sets_EMTAB2086_70_vs_30_GSE59861_6h_2Gy_GSE59861_6h_5cGy	X3_sets_EMTAB2086_80_vs_30_GSE59861_6h_2Gy_GSE59861_6h_5cGy	X4_sets_EMTAB2086_70_vs_30_EMTAB2086_80_vs_30_GSE59861_6h_2Gy_GSE59861_6h_5cGy
Akt_Signaling_Pathway_Cell_Cycle_Progression	AHR_Pathway_CYP1A1_CYP1B1_CYP1A2_AHRR_gene_expression_via_POLR2B	NCI_FOXA1_transcription_factor_network_Main_Pathway	NCI_Regulation_of_Androgen_receptor_activity_Pathway_(Pathway_positive_regulation_of_transcription_via_GATA2)	Akt_Signaling_Pathway_Regulation_of_Cyclic_Nucleotide	NA	NCI_Regulation_of_Androgen_receptor_activity_Pathway_(Pathway_positive_regulation_of_transcription_via_GATA2)	NA	NCI_Regulation_of_Androgen_receptor_activity_Pathway_(Pathway_positive_regulation_of_transcription_via_GATA2)	NA	NA	NCI_Regulation_of_Androgen_receptor_activity_Pathway_(Pathway_positive_regulation_of_transcription_via_GATA2)	NA	NA	NA
Akt_Signaling_Pathway_Regulation_of_Cyclic_Nucleotide	Akt_Signaling_Pathway_Acetylation_of_proteins	NA	NCI_RhoA_signaling_Pathway_(Pathway_positive_regulation_of_NF_kappaB_transcription_factor_activity_via_RHOA)	ATM_Pathway_DNA_repair	NA	NA	NA	NA	NA	NA	NA	NA	NA	NA
ATM_Pathway_DNA_repair	Akt_Signaling_Pathway_AR_mediated_apoptosis	NA	reactome_ATF6_alpha_activates_chaperone_genes_Main_Pathway	ATM_Pathway_Repair_and_Recombination	NA	NA	NA	NA	NA	NA	NA	NA	NA	NA
ATM_Pathway_Repair_and_Recombination	Akt_Signaling_Pathway_Regulation_of_Cyclic_Nucleotide	NA	reactome_ATF6_alpha_activates_chaperones_Main_Pathway	ATM_Pathway_S-phase_arrest	NA	NA	NA	NA	NA	NA	NA	NA	NA	NA
ATM_Pathway_S-phase_arrest	Akt_Signaling_Pathway_Synaptic_Transmission	NA	NA	BRCA1_Pathway	NA	NA	NA	NA	NA	NA	NA	NA	NA	NA
BRCA1_Pathway	ATM_Pathway_Apoptosis_and_Senescence	NA	NA	BRCA1_Pathway_Growth_Promoting_Genes_hTert_S100A7	NA	NA	NA	NA	NA	NA	NA	NA	NA	NA
BRCA1_Pathway_Growth_Promoting_Genes_hTert_S100A7	ATM_Pathway_DNA_repair	NA	NA	BRCA1_Pathway_Homologous_Recombination_Repair	NA	NA	NA	NA	NA	NA	NA	NA	NA	NA
BRCA1_Pathway_Homologous_Recombination_Repair	ATM_Pathway_Repair_and_Recombination	NA	NA	BRCA1_Pathway_Mismatch_Repair	NA	NA	NA	NA	NA	NA	NA	NA	NA	NA
BRCA1_Pathway_Mismatch_Repair	ATM_Pathway_S-phase_arrest	NA	NA	Cellular_Apoptosis_Pathway_Depolarization	NA	NA	NA	NA	NA	NA	NA	NA	NA	NA
Cellular_Apoptosis_Pathway_Depolarization	ATM_Pathway_S-phase_progression	NA	NA	Cellular_Apoptosis_Pathway_Gene_Expression_BAX_BID_BAK_Ras_Noxa_PUMA_APAF1_Survivin_BCL2_via_TP53	NA	NA	NA	NA	NA	NA	NA	NA	NA	NA
Cellular_Apoptosis_Pathway_Gene_Expression_BAX_BID_BAK_Ras_Noxa_PUMA_APAF1_Survivin_BCL2_via_TP53	BRCA1_Pathway	NA	NA	EGF_Pathway_Rab5_Regulation_Pathway	NA	NA	NA	NA	NA	NA	NA	NA	NA	NA
EGF_Pathway_Rab5_Regulation_Pathway	BRCA1_Pathway_Base_Excission_Repair	NA	NA	IL-2_Pathway_Apoptosis	NA	NA	NA	NA	NA	NA	NA	NA	NA	NA
IL-2_Pathway_Apoptosis	BRCA1_Pathway_Cell_Cycle_Arrest_DNA_Repair_Genes_p21_WAF_CIP1_14-3-3_GADD45	NA	NA	Interferon_Pathway_Gene_Expression_via_HIST1H3B_CREB3	NA	NA	NA	NA	NA	NA	NA	NA	NA	NA
Interferon_Pathway_Gene_Expression_via_HIST1H3B_CREB3	BRCA1_Pathway_Chromatin_Remodeling	NA	NA	IP3_Pathway_Gene_Expression_via_CREB3_NFATC2_MEF2D	NA	NA	NA	NA	NA	NA	NA	NA	NA	NA
IP3_Pathway_Gene_Expression_via_CREB3_NFATC2_MEF2D	BRCA1_Pathway_E2_Responsive_Genes	NA	NA	KEGG_Basal_cell_carcinoma_Main_Pathway	NA	NA	NA	NA	NA	NA	NA	NA	NA	NA
KEGG_Basal_cell_carcinoma_Main_Pathway	BRCA1_Pathway_G1_S_arrest	NA	NA	KEGG_Base_excision_repair_Main_Pathway	NA	NA	NA	NA	NA	NA	NA	NA	NA	NA
KEGG_Base_excision_repair_Main_Pathway	BRCA1_Pathway_Growth_Promoting_Genes_hTert_S100A7	NA	NA	KEGG_Bile_secretion_Main_Pathway	NA	NA	NA	NA	NA	NA	NA	NA	NA	NA
KEGG_Bile_secretion_Main_Pathway	BRCA1_Pathway_Homologous_Recombination_Repair	NA	NA	KEGG_DNA_replication_Main_Pathway	NA	NA	NA	NA	NA	NA	NA	NA	NA	NA
KEGG_DNA_replication_Main_Pathway	BRCA1_Pathway_Mismatch_Repair	NA	NA	KEGG_Fanconi_anemia_Main_Pathway	NA	NA	NA	NA	NA	NA	NA	NA	NA	NA
KEGG_Fanconi_anemia_Main_Pathway	BRCA1_Pathway_NHEJ_DSB_Repair	NA	NA	KEGG_Fatty_acid_biosynthesis_Main_Pathway	NA	NA	NA	NA	NA	NA	NA	NA	NA	NA
KEGG_Fatty_acid_biosynthesis_Main_Pathway	BRCA1_Pathway_Nucleotide_Excission_Repair	NA	NA	KEGG_Hedgehog_signaling_Main_Pathway	NA	NA	NA	NA	NA	NA	NA	NA	NA	NA
KEGG_Hedgehog_signaling_Main_Pathway	BRCA1_Pathway_Transciption_Coupled_Repair	NA	NA	KEGG_Homologous_recombination_Main_Pathway	NA	NA	NA	NA	NA	NA	NA	NA	NA	NA
KEGG_Homologous_recombination_Main_Pathway	Caspase_Cascade_Pathway	NA	NA	KEGG_Lipoic_acid_metabolism_Main_Pathway	NA	NA	NA	NA	NA	NA	NA	NA	NA	NA
KEGG_Inflammatory_bowel_disease_IBD__Main_Pathway	Caspase_Cascade_Pathway_Activated_Tissue_Trans-glutaminase	NA	NA	KEGG_Mismatch_repair_Main_Pathway	NA	NA	NA	NA	NA	NA	NA	NA	NA	NA
KEGG_Lipoic_acid_metabolism_Main_Pathway	Caspase_Cascade_Pathway_DNA_Fragmentation	NA	NA	KEGG_Non_homologous_end_joining_Main_Pathway	NA	NA	NA	NA	NA	NA	NA	NA	NA	NA
KEGG_Mismatch_repair_Main_Pathway	Cellular_Apoptosis_Pathway_Depolarization	NA	NA	KEGG_Nucleotide_excision_repair_Main_Pathway	NA	NA	NA	NA	NA	NA	NA	NA	NA	NA
KEGG_Non_homologous_end_joining_Main_Pathway	Cellular_Apoptosis_Pathway_Gene_Expression_BAX_BID_BAK_Ras_Noxa_PUMA_APAF1_Survivin_BCL2_via_TP53	NA	NA	KEGG_One_carbon_pool_by_folate_Main_Pathway	NA	NA	NA	NA	NA	NA	NA	NA	NA	NA
KEGG_Nucleotide_excision_repair_Main_Pathway	Chemokine_Pathway_Internalization_Degradation_Recycling	NA	NA	KEGG_Oocyte_meiosis_Main_Pathway	NA	NA	NA	NA	NA	NA	NA	NA	NA	NA
KEGG_One_carbon_pool_by_folate_Main_Pathway	Chromatin_Pathway	NA	NA	KEGG_Phenylalanine_metabolism_Main_Pathway	NA	NA	NA	NA	NA	NA	NA	NA	NA	NA
KEGG_Oocyte_meiosis_Main_Pathway	EGF_Pathway_Cell_Survival	NA	NA	KEGG_Pyrimidine_metabolism_Main_Pathway	NA	NA	NA	NA	NA	NA	NA	NA	NA	NA
KEGG_Phenylalanine_metabolism_Main_Pathway	EGF_Pathway_Rab5_Regulation_Pathway	NA	NA	KEGG_Tryptophan_metabolism_Main_Pathway	NA	NA	NA	NA	NA	NA	NA	NA	NA	NA
KEGG_Pyrimidine_metabolism_Main_Pathway	ErbB_Family_Pathway	NA	NA	KEGG_Ubiquinone_and_other_terpenoid_quinone_biosynthesis_Main_Pathway	NA	NA	NA	NA	NA	NA	NA	NA	NA	NA
KEGG_Sphingolipid_metabolism_Main_Pathway	ErbB_Family_Pathway_Gene_Expression_via_JUN_FOS_ELK1	NA	NA	MAPK_Family_Pathway_Chromatin_Remodelling	NA	NA	NA	NA	NA	NA	NA	NA	NA	NA
KEGG_Tryptophan_metabolism_Main_Pathway	ERK_Signaling_Pathway_Cell_Survival	NA	NA	Mismatch_Repair_in_Eukaryotes_Pathway	NA	NA	NA	NA	NA	NA	NA	NA	NA	NA
KEGG_Ubiquinone_and_other_terpenoid_quinone_biosynthesis_Main_Pathway	ERK_Signaling_Pathway_Gene_Expression_via_CAPN6_TP53_FOS_ATF1_MYC_ELK3_MYLK_ETS1_SRF_HIST1H3B_CREB3_STAT3_NFKB2_HMGN1_ESR2_ELK1_PAX6_JUN	NA	NA	NCI_ATM_Pathway_(chromatin_remodeling)	NA	NA	NA	NA	NA	NA	NA	NA	NA	NA
MAPK_Family_Pathway_Chromatin_Remodelling	ERK_Signaling_Pathway_Translation	NA	NA	NCI_ATM_Pathway_(double_strand_break_repair_via_nonhomologous_end_joining)	NA	NA	NA	NA	NA	NA	NA	NA	NA	NA
Mismatch_Repair_in_Eukaryotes_Pathway	Erythropoietin_Pathway	NA	NA	NCI_ATM_Pathway_(G2_M_transition_checkpoint)	NA	NA	NA	NA	NA	NA	NA	NA	NA	NA
NCI_ATM_Pathway_(chromatin_remodeling)	Erythropoietin_Pathway_Cell_Cycle_Progression	NA	NA	NCI_ATM_Pathway_(Pathway_rRNA_transcription_via_ATM)	NA	NA	NA	NA	NA	NA	NA	NA	NA	NA
NCI_ATM_Pathway_(double_strand_break_repair_via_nonhomologous_end_joining)	Erythropoietin_Pathway_Cell_Survival	NA	NA	NCI_ATR_signaling_Main_Pathway	NA	NA	NA	NA	NA	NA	NA	NA	NA	NA
NCI_ATM_Pathway_(G2_M_transition_checkpoint)	Estrogen_Pathway_Gene_Expression_via_FOS_JUN_ELK1_SP1_POLR2B_CREB3_NFKB2	NA	NA	NCI_ATR_signaling_Pathway_(Pathway_negative_regulation_of_transcription_during_mitosis_via_CHEK1)	NA	NA	NA	NA	NA	NA	NA	NA	NA	NA
NCI_ATM_Pathway_(Pathway_rRNA_transcription_via_ATM)	FLT3_Signaling_Pathway	NA	NA	NCI_ATR_signaling_Pathway_(regulation_of_double_strand_break_repair_via_homologous_recombination)	NA	NA	NA	NA	NA	NA	NA	NA	NA	NA
NCI_ATR_signaling_Main_Pathway	FLT3_Signaling_Pathway_Transcription_via_ELK3_MAPK12_CREB3_STAT2	NA	NA	NCI_ATR_signaling_Pathway_(response_to_G2_M_transition_DNA_damage_checkpoint_signal)	NA	NA	NA	NA	NA	NA	NA	NA	NA	NA
NCI_ATR_signaling_Pathway_(Pathway_negative_regulation_of_transcription_during_mitosis_via_CHEK1)	Glucocorticoid_Receptor_Signaling_Pathway	NA	NA	NCI_Atypical_NF_kappaB_Pathway_(Pathway_degradation_of_NFKB1_NFKBIA)	NA	NA	NA	NA	NA	NA	NA	NA	NA	NA
NCI_ATR_signaling_Pathway_(regulation_of_double_strand_break_repair_via_homologous_recombination)	Glucocorticoid_Receptor_Signaling_Pathway_Cell_Cycle_Progression	NA	NA	NCI_Atypical_NF_kappaB_Pathway_(Pathway_degradation_of_NFKBIA)	NA	NA	NA	NA	NA	NA	NA	NA	NA	NA
NCI_ATR_signaling_Pathway_(response_to_G2_M_transition_DNA_damage_checkpoint_signal)	Glucocorticoid_Receptor_Signaling_Pathway_Gene_Expression_via_CREB3_STAT5B_SLC22A2_POU2F1	NA	NA	NCI_Atypical_NF_kappaB_Pathway_(positive_regulation_of_anti_apoptosis)	NA	NA	NA	NA	NA	NA	NA	NA	NA	NA
NCI_Atypical_NF_kappaB_Pathway_(Pathway_degradation_of_NFKB1_NFKBIA)	Glucocorticoid_Receptor_Signaling_Pathway_Histone_Deacetylation	NA	NA	NCI_Aurora_A_signaling_Pathway_(regulation_of_centrosome_cycle)	NA	NA	NA	NA	NA	NA	NA	NA	NA	NA
NCI_Atypical_NF_kappaB_Pathway_(Pathway_degradation_of_NFKBIA)	Glucocorticoid_Receptor_Signaling_Pathway_Inflammatory_Cytokines	NA	NA	NCI_Aurora_B_signaling_Main_Pathway	NA	NA	NA	NA	NA	NA	NA	NA	NA	NA
NCI_Atypical_NF_kappaB_Pathway_(positive_regulation_of_anti_apoptosis)	GPCR_Pathway	NA	NA	NCI_Aurora_B_signaling_Pathway_(cytokinesis)	NA	NA	NA	NA	NA	NA	NA	NA	NA	NA
NCI_Aurora_A_signaling_Pathway_(regulation_of_centrosome_cycle)	GPCR_Pathway_Gene_Expression_via_JUN_NFKB2_ELK1_SRF_FOS_CREB3	NA	NA	NCI_Aurora_C_signaling_Main_Pathway	NA	NA	NA	NA	NA	NA	NA	NA	NA	NA
NCI_Aurora_B_signaling_Main_Pathway	GSK3_Signaling_Pathway	NA	NA	NCI_BARD1_signaling_events_Main_Pathway	NA	NA	NA	NA	NA	NA	NA	NA	NA	NA
NCI_Aurora_B_signaling_Pathway_(cytokinesis)	GSK3_Signaling_Pathway_Glycogen_Synthesis	NA	NA	NCI_BARD1_signaling_events_Pathway_(DNA_damage_checkpoint)	NA	NA	NA	NA	NA	NA	NA	NA	NA	NA
NCI_Aurora_C_signaling_Main_Pathway	HGF_Pathway	NA	NA	NCI_BARD1_signaling_events_Pathway_(DNA_repair)	NA	NA	NA	NA	NA	NA	NA	NA	NA	NA
NCI_BARD1_signaling_events_Main_Pathway	HGF_Pathway_IP3_Pathway	NA	NA	NCI_BARD1_signaling_events_Pathway_(protein_ubiquitination)	NA	NA	NA	NA	NA	NA	NA	NA	NA	NA
NCI_BARD1_signaling_events_Pathway_(DNA_damage_checkpoint)	HIF1Alpha_Pathway	NA	NA	NCI_Caspase_Cascade_in_Apoptosis_Pathway_(actin_filament_polymerization)	NA	NA	NA	NA	NA	NA	NA	NA	NA	NA
NCI_BARD1_signaling_events_Pathway_(DNA_repair)	HIF1Alpha_Pathway_p53_Hypoxia_Pathway	NA	NA	NCI_Caspase_Cascade_in_Apoptosis_Pathway_(DNA_repair)	NA	NA	NA	NA	NA	NA	NA	NA	NA	NA
NCI_BARD1_signaling_events_Pathway_(protein_ubiquitination)	IGF1R_Signaling_Pathway_Apoptosis	NA	NA	NCI_Caspase_Cascade_in_Apoptosis_Pathway_(positive_regulation_of_apoptosis)	NA	NA	NA	NA	NA	NA	NA	NA	NA	NA
NCI_Caspase_Cascade_in_Apoptosis_Pathway_(actin_filament_polymerization)	IGF1R_Signaling_Pathway_Cell_Proliferation_Diferentiation_and_Apoptosis	NA	NA	NCI_Circadian_rhythm_Main_Pathway	NA	NA	NA	NA	NA	NA	NA	NA	NA	NA
NCI_Caspase_Cascade_in_Apoptosis_Pathway_(DNA_repair)	IGF1R_Signaling_Pathway_Gene_Expression_Proliferation_Growth_Survival_via_NFAT5_CREB3	NA	NA	NCI_Circadian_rhythm_Pathway_(chromatin_modification)	NA	NA	NA	NA	NA	NA	NA	NA	NA	NA
NCI_Caspase_Cascade_in_Apoptosis_Pathway_(positive_regulation_of_apoptosis)	IL-10_Pathway	NA	NA	NCI_Circadian_rhythm_Pathway_(S_phase_of_mitotic_cell_cycle)	NA	NA	NA	NA	NA	NA	NA	NA	NA	NA
NCI_Circadian_rhythm_Main_Pathway	IL-10_Pathway_IL-10_Responsive_Genes_Transcription_of_BCLXL_Cyclin-D1_D2_D3_Pim1_c-Myc_and_P19(INK4D)_via_STAT3	NA	NA	NCI_Class_IB_PI3K_non_lipid_kinase_events_Pathway_(cAMP_biosynthetic_process)	NA	NA	NA	NA	NA	NA	NA	NA	NA	NA
NCI_Circadian_rhythm_Pathway_(chromatin_modification)	IL-10_Pathway_Inflammatory_Cytokine_Genes_Expression_via_STAT3	NA	NA	NCI_DNA_PK_pathway_in_nonhomologous_end_joining_Main_Pathway	NA	NA	NA	NA	NA	NA	NA	NA	NA	NA
NCI_Circadian_rhythm_Pathway_(S_phase_of_mitotic_cell_cycle)	IL-10_Pathway_Translational_Modulation	NA	NA	NCI_DNA_PK_pathway_in_nonhomologous_end_joining_Pathway_(double_strand_break_repair_via_homologous_recombination)	NA	NA	NA	NA	NA	NA	NA	NA	NA	NA
NCI_Class_IB_PI3K_non_lipid_kinase_events_Pathway_(cAMP_biosynthetic_process)	IL-2_Pathway_Apoptosis	NA	NA	NCI_DNA_PK_pathway_in_nonhomologous_end_joining_Pathway_(double_strand_break_repair_via_nonhomologous_end_joining)	NA	NA	NA	NA	NA	NA	NA	NA	NA	NA
NCI_DNA_PK_pathway_in_nonhomologous_end_joining_Main_Pathway	IL-2_Pathway_IL2_Gene_Expression_via_POLR1E_EGR1_HMGA1_ELF1_POU2F1_MYC	NA	NA	NCI_DNA_PK_pathway_in_nonhomologous_end_joining_Pathway_(immunoglobulin_heavy_chain_V_D_J_recombination)	NA	NA	NA	NA	NA	NA	NA	NA	NA	NA
NCI_DNA_PK_pathway_in_nonhomologous_end_joining_Pathway_(double_strand_break_repair_via_homologous_recombination)	ILK_Signaling_Pathway_Epithelial_Mesenchymal_Transition	NA	NA	NCI_DNA_PK_pathway_in_nonhomologous_end_joining_Pathway_(immunoglobulin_light_chain_V_J_recombination)	NA	NA	NA	NA	NA	NA	NA	NA	NA	NA
NCI_DNA_PK_pathway_in_nonhomologous_end_joining_Pathway_(double_strand_break_repair_via_nonhomologous_end_joining)	Interferon_Pathway	NA	NA	NCI_DNA_PK_pathway_in_nonhomologous_end_joining_Pathway_(V_D_J_recombination)	NA	NA	NA	NA	NA	NA	NA	NA	NA	NA
NCI_DNA_PK_pathway_in_nonhomologous_end_joining_Pathway_(immunoglobulin_heavy_chain_V_D_J_recombination)	Interferon_Pathway_Gene_Expression_via_HIST1H3B_CREB3	NA	NA	NCI_Endogenous_TLR_signaling_Pathway_(regulation_of_cell_adhesion)	NA	NA	NA	NA	NA	NA	NA	NA	NA	NA
NCI_DNA_PK_pathway_in_nonhomologous_end_joining_Pathway_(immunoglobulin_light_chain_V_J_recombination)	Interferon_Pathway_Translation	NA	NA	NCI_Fanconi_anemia_Main_Pathway	NA	NA	NA	NA	NA	NA	NA	NA	NA	NA
NCI_DNA_PK_pathway_in_nonhomologous_end_joining_Pathway_(V_D_J_recombination)	IP3_Pathway_Gene_Expression_via_CREB3_NFATC2_MEF2D	NA	NA	NCI_Fanconi_anemia_Pathway_(DNA_repair)	NA	NA	NA	NA	NA	NA	NA	NA	NA	NA
NCI_Effects_of_Botulinum_toxin_Main_Pathway	JAK-STAT_Pathway	NA	NA	NCI_Fanconi_anemia_Pathway_(G1_S_transition_checkpoint)	NA	NA	NA	NA	NA	NA	NA	NA	NA	NA
NCI_Endogenous_TLR_signaling_Pathway_(regulation_of_cell_adhesion)	KEGG_ABC_transporters_Main_Pathway	NA	NA	NCI_Fanconi_anemia_Pathway_(regulation_of_double_strand_break_repair_via_homologous_recombination)	NA	NA	NA	NA	NA	NA	NA	NA	NA	NA
NCI_Fanconi_anemia_Main_Pathway	KEGG_Alanine_aspartate_and_glutamate_metabolism_Main_Pathway	NA	NA	NCI_Fanconi_anemia_Pathway_(Sister_Chromatid_Exchange_Process)	NA	NA	NA	NA	NA	NA	NA	NA	NA	NA
NCI_Fanconi_anemia_Pathway_(DNA_repair)	KEGG_Aldosterone_regulated_sodium_reabsorption_Main_Pathway	NA	NA	NCI_FOXM1_transcription_factor_network_Main_Pathway	NA	NA	NA	NA	NA	NA	NA	NA	NA	NA
NCI_Fanconi_anemia_Pathway_(G1_S_transition_checkpoint)	KEGG_Amphetamine_addiction_Main_Pathway	NA	NA	NCI_Glypican_2_network_Main_Pathway	NA	NA	NA	NA	NA	NA	NA	NA	NA	NA
NCI_Fanconi_anemia_Pathway_(regulation_of_double_strand_break_repair_via_homologous_recombination)	KEGG_Apoptosis_Main_Pathway	NA	NA	NCI_Integrin_linked_kinase_signaling_Pathway_(centrosome_localization)	NA	NA	NA	NA	NA	NA	NA	NA	NA	NA
NCI_Fanconi_anemia_Pathway_(Sister_Chromatid_Exchange_Process)	KEGG_Ascorbate_and_aldarate_metabolism_Main_Pathway	NA	NA	NCI_PDGF_receptor_signaling_network_Main_Pathway	NA	NA	NA	NA	NA	NA	NA	NA	NA	NA
NCI_FGF_signaling_Pathway_(MAPKKK_cascade)	KEGG_Axon_guidance_Main_Pathway	NA	NA	NCI_PDGF_receptor_signaling_network_Pathway_(platelet_derived_growth_factor_receptor_signaling_pathway)	NA	NA	NA	NA	NA	NA	NA	NA	NA	NA
NCI_FOXM1_transcription_factor_network_Main_Pathway	KEGG_Basal_cell_carcinoma_Main_Pathway	NA	NA	NCI_PLK1_signaling_events_Main_Pathway	NA	NA	NA	NA	NA	NA	NA	NA	NA	NA
NCI_Glypican_2_network_Main_Pathway	KEGG_Basal_transcription_factors_Main_Pathway	NA	NA	NCI_PLK1_signaling_events_Pathway_(chromosome_segregation)	NA	NA	NA	NA	NA	NA	NA	NA	NA	NA
NCI_Integrin_linked_kinase_signaling_Pathway_(centrosome_localization)	KEGG_Base_excision_repair_Main_Pathway	NA	NA	NCI_PLK1_signaling_events_Pathway_(G2_M_transition_of_mitotic_cell_cycle)	NA	NA	NA	NA	NA	NA	NA	NA	NA	NA
NCI_PDGF_receptor_signaling_network_Main_Pathway	KEGG_beta_Alanine_metabolism_Main_Pathway	NA	NA	NCI_PLK1_signaling_events_Pathway_(Golgi_organization)	NA	NA	NA	NA	NA	NA	NA	NA	NA	NA
NCI_PDGF_receptor_signaling_network_Pathway_(platelet_derived_growth_factor_receptor_signaling_pathway)	KEGG_Bile_secretion_Main_Pathway	NA	NA	NCI_PLK1_signaling_events_Pathway_(metaphase_plate_congression)	NA	NA	NA	NA	NA	NA	NA	NA	NA	NA
NCI_PLK1_signaling_events_Main_Pathway	KEGG_Biosynthesis_of_unsaturated_fatty_acids_Main_Pathway	NA	NA	NCI_PLK1_signaling_events_Pathway_(microtubule_cytoskeleton_organization)	NA	NA	NA	NA	NA	NA	NA	NA	NA	NA
NCI_PLK1_signaling_events_Pathway_(chromosome_segregation)	KEGG_Calcium_signaling_Main_Pathway	NA	NA	NCI_PLK1_signaling_events_Pathway_(positive_regulation_of_microtubule_depolymerization)	NA	NA	NA	NA	NA	NA	NA	NA	NA	NA
NCI_PLK1_signaling_events_Pathway_(G2_M_transition_of_mitotic_cell_cycle)	KEGG_cAMP_signaling_Main_Pathway	NA	NA	NCI_PLK1_signaling_events_Pathway_(proteasomal_ubiquitin_dependent_protein_catabolic_process)	NA	NA	NA	NA	NA	NA	NA	NA	NA	NA
NCI_PLK1_signaling_events_Pathway_(Golgi_organization)	KEGG_Cardiac_muscle_contraction_Main_Pathway	NA	NA	NCI_PLK1_signaling_events_Pathway_(regulation_of_attachment_of_spindle_microtubules_to_kinetochore)	NA	NA	NA	NA	NA	NA	NA	NA	NA	NA
NCI_PLK1_signaling_events_Pathway_(metaphase_plate_congression)	KEGG_Chagas_disease_American_trypanosomiasis__Main_Pathway	NA	NA	NCI_PLK1_signaling_events_Pathway_(regulation_of_centriole_centriole_cohesion)	NA	NA	NA	NA	NA	NA	NA	NA	NA	NA
NCI_PLK1_signaling_events_Pathway_(microtubule_cytoskeleton_organization)	KEGG_Chemical_carcinogenesis_Main_Pathway	NA	NA	NCI_PLK1_signaling_events_Pathway_(regulation_of_mitotic_centrosome_separation)	NA	NA	NA	NA	NA	NA	NA	NA	NA	NA
NCI_PLK1_signaling_events_Pathway_(positive_regulation_of_microtubule_depolymerization)	KEGG_Choline_metabolism_in_cancer_Main_Pathway	NA	NA	NCI_PLK1_signaling_events_Pathway_(spindle_assembly)	NA	NA	NA	NA	NA	NA	NA	NA	NA	NA
NCI_PLK1_signaling_events_Pathway_(proteasomal_ubiquitin_dependent_protein_catabolic_process)	KEGG_Cyanoamino_acid_metabolism_Main_Pathway	NA	NA	NCI_PLK1_signaling_events_Pathway_(spindle_elongation)	NA	NA	NA	NA	NA	NA	NA	NA	NA	NA
NCI_PLK1_signaling_events_Pathway_(regulation_of_attachment_of_spindle_microtubules_to_kinetochore)	KEGG_Cysteine_and_methionine_metabolism_Main_Pathway	NA	NA	NCI_PLK1_signaling_events_Pathway_(spindle_stabilization)	NA	NA	NA	NA	NA	NA	NA	NA	NA	NA
NCI_PLK1_signaling_events_Pathway_(regulation_of_centriole_centriole_cohesion)	KEGG_Dilated_cardiomyopathy_Main_Pathway	NA	NA	NCI_PLK2_and_PLK4_events_Main_Pathway	NA	NA	NA	NA	NA	NA	NA	NA	NA	NA
NCI_PLK1_signaling_events_Pathway_(regulation_of_mitotic_centrosome_separation)	KEGG_DNA_replication_Main_Pathway	NA	NA	NCI_PLK2_and_PLK4_events_Pathway_(regulation_of_centriole_replication)	NA	NA	NA	NA	NA	NA	NA	NA	NA	NA
NCI_PLK1_signaling_events_Pathway_(spindle_assembly)	KEGG_Drug_metabolism_other_enzymes_Main_Pathway	NA	NA	NCI_RAC1_signaling_Pathway_(neuron_projection_development)	NA	NA	NA	NA	NA	NA	NA	NA	NA	NA
NCI_PLK1_signaling_events_Pathway_(spindle_elongation)	KEGG_Ether_lipid_metabolism_Main_Pathway	NA	NA	NCI_Reelin_signaling_Main_Pathway	NA	NA	NA	NA	NA	NA	NA	NA	NA	NA
NCI_PLK1_signaling_events_Pathway_(spindle_stabilization)	KEGG_Fanconi_anemia_Main_Pathway	NA	NA	NCI_Reelin_signaling_Pathway_(long_term_memory)	NA	NA	NA	NA	NA	NA	NA	NA	NA	NA
NCI_PLK2_and_PLK4_events_Main_Pathway	KEGG_Fatty_acid_biosynthesis_Main_Pathway	NA	NA	NCI_Reelin_signaling_Pathway_(neuron_migration)	NA	NA	NA	NA	NA	NA	NA	NA	NA	NA
NCI_PLK2_and_PLK4_events_Pathway_(regulation_of_centriole_replication)	KEGG_Fatty_acid_degradation_Main_Pathway	NA	NA	NCI_Regulation_of_Androgen_receptor_activity_Pathway_(Pathway_positive_regulation_of_transcription_via_GATA2)	NA	NA	NA	NA	NA	NA	NA	NA	NA	NA
NCI_RAC1_signaling_Pathway_(neuron_projection_development)	KEGG_Focal_adhesion_Main_Pathway	NA	NA	NCI_Regulation_of_retinoblastoma_protein_Main_Pathway	NA	NA	NA	NA	NA	NA	NA	NA	NA	NA
NCI_Reelin_signaling_Main_Pathway	KEGG_Fructose_and_mannose_metabolism_Main_Pathway	NA	NA	NCI_Regulation_of_retinoblastoma_protein_Pathway_(histone_methylation)	NA	NA	NA	NA	NA	NA	NA	NA	NA	NA
NCI_Reelin_signaling_Pathway_(long_term_memory)	KEGG_Galactose_metabolism_Main_Pathway	NA	NA	NCI_RhoA_signaling_Pathway_(Golgi_organization)	NA	NA	NA	NA	NA	NA	NA	NA	NA	NA
NCI_Reelin_signaling_Pathway_(neuron_migration)	KEGG_Gastric_acid_secretion_Main_Pathway	NA	NA	NCI_Signaling_events_mediated_by_HDAC_Class_I_Main_Pathway	NA	NA	NA	NA	NA	NA	NA	NA	NA	NA
NCI_Regulation_of_Androgen_receptor_activity_Pathway_(Pathway_positive_regulation_of_transcription_via_GATA2)	KEGG_Glycerolipid_metabolism_Main_Pathway	NA	NA	NCI_Signaling_events_mediated_by_HDAC_Class_I_Pathway_(histone_deacetylation)	NA	NA	NA	NA	NA	NA	NA	NA	NA	NA
NCI_Regulation_of_retinoblastoma_protein_Main_Pathway	KEGG_Glycerophospholipid_metabolism_Main_Pathway	NA	NA	NCI_Signaling_events_mediated_by_the_Hedgehog_family_Pathway_(determination_of_left_right_symmetry)	NA	NA	NA	NA	NA	NA	NA	NA	NA	NA
NCI_Regulation_of_retinoblastoma_protein_Pathway_(histone_methylation)	KEGG_Glycine_serine_and_threonine_metabolism_Main_Pathway	NA	NA	NCI_Signaling_events_mediated_by_the_Hedgehog_family_Pathway_(heart_development)	NA	NA	NA	NA	NA	NA	NA	NA	NA	NA
NCI_RhoA_signaling_Pathway_(Golgi_organization)	KEGG_Glycosphingolipid_biosynthesis_globo_series_Main_Pathway	NA	NA	NCI_Signaling_events_mediated_by_the_Hedgehog_family_Pathway_(heart_looping)	NA	NA	NA	NA	NA	NA	NA	NA	NA	NA
NCI_Signaling_events_mediated_by_HDAC_Class_I_Main_Pathway	KEGG_Glycosphingolipid_biosynthesis_lacto_and_neolacto_series_Main_Pathway	NA	NA	NCI_Signaling_events_mediated_by_the_Hedgehog_family_Pathway_(somite_specification)	NA	NA	NA	NA	NA	NA	NA	NA	NA	NA
NCI_Signaling_events_mediated_by_HDAC_Class_I_Pathway_(histone_deacetylation)	KEGG_Hedgehog_signaling_Main_Pathway	NA	NA	NCI_Signaling_events_mediated_by_VEGFR1_and_VEGFR2_Pathway_(Pathway_degradation_of_AKAP1)	NA	NA	NA	NA	NA	NA	NA	NA	NA	NA
NCI_Signaling_events_mediated_by_the_Hedgehog_family_Pathway_(determination_of_left_right_symmetry)	KEGG_Homologous_recombination_Main_Pathway	NA	NA	NCI_Signaling_mediated_by_p38_gamma_and_p38_delta_Pathway_(G2_M_transition_checkpoint)	NA	NA	NA	NA	NA	NA	NA	NA	NA	NA
NCI_Signaling_events_mediated_by_the_Hedgehog_family_Pathway_(heart_development)	KEGG_HTLV_I_infection_Main_Pathway	NA	NA	NCI_Syndecan_4_mediated_signaling_events_Main_Pathway	NA	NA	NA	NA	NA	NA	NA	NA	NA	NA
NCI_Signaling_events_mediated_by_the_Hedgehog_family_Pathway_(heart_looping)	KEGG_Hypertrophic_cardiomyopathy_HCM__Main_Pathway	NA	NA	NCI_Trk_receptor_signaling_mediated_by_PI3K_and_PLC_gamma_Pathway_(regulation_of_long_term_neuronal_synaptic_plasticity)	NA	NA	NA	NA	NA	NA	NA	NA	NA	NA
NCI_Signaling_events_mediated_by_the_Hedgehog_family_Pathway_(somite_specification)	KEGG_Leukocyte_transendothelial_migration_Main_Pathway	NA	NA	PTEN_Pathway_DNA_Repair	NA	NA	NA	NA	NA	NA	NA	NA	NA	NA
NCI_Signaling_events_mediated_by_VEGFR1_and_VEGFR2_Pathway_(Pathway_degradation_of_AKAP1)	KEGG_Lipoic_acid_metabolism_Main_Pathway	NA	NA	Ras_Pathway_Receptor_Endocytosis	NA	NA	NA	NA	NA	NA	NA	NA	NA	NA
NCI_Signaling_mediated_by_p38_gamma_and_p38_delta_Pathway_(G2_M_transition_checkpoint)	KEGG_Lysine_biosynthesis_Main_Pathway	NA	NA	reactome_Abnormal_metabolism_in_phenylketonuria_Main_Pathway	NA	NA	NA	NA	NA	NA	NA	NA	NA	NA
NCI_Syndecan_4_mediated_signaling_events_Main_Pathway	KEGG_Melanoma_Main_Pathway	NA	NA	reactome_Activation_of_ATR_in_response_to_replication_stress_Main_Pathway	NA	NA	NA	NA	NA	NA	NA	NA	NA	NA
NCI_Trk_receptor_signaling_mediated_by_PI3K_and_PLC_gamma_Pathway_(regulation_of_long_term_neuronal_synaptic_plasticity)	KEGG_Metabolism_of_xenobiotics_by_cytochrome_P450_Main_Pathway	NA	NA	reactome_Activation_of_DNA_fragmentation_factor_Main_Pathway	NA	NA	NA	NA	NA	NA	NA	NA	NA	NA
PTEN_Pathway_DNA_Repair	KEGG_Mismatch_repair_Main_Pathway	NA	NA	reactome_Activation_of_NIMA_Kinases_NEK9_NEK6_NEK7_Main_Pathway	NA	NA	NA	NA	NA	NA	NA	NA	NA	NA
Ras_Pathway_Receptor_Endocytosis	KEGG_mRNA_surveillance_Main_Pathway	NA	NA	reactome_Activation_of_NOXA_and_translocation_to_mitochondria_Main_Pathway	NA	NA	NA	NA	NA	NA	NA	NA	NA	NA
reactome_Abnormal_metabolism_in_phenylketonuria_Main_Pathway	KEGG_Mucin_type_O_Glycan_biosynthesis_Main_Pathway	NA	NA	reactome_Activation_of_PUMA_and_translocation_to_mitochondria_Main_Pathway	NA	NA	NA	NA	NA	NA	NA	NA	NA	NA
reactome_Activation_of_ATR_in_response_to_replication_stress_Main_Pathway	KEGG_Nitrogen_metabolism_Main_Pathway	NA	NA	reactome_Activation_of_the_pre_replicative_complex_Main_Pathway	NA	NA	NA	NA	NA	NA	NA	NA	NA	NA
reactome_Activation_of_DNA_fragmentation_factor_Main_Pathway	KEGG_Non_homologous_end_joining_Main_Pathway	NA	NA	reactome_Amyloids_Main_Pathway	NA	NA	NA	NA	NA	NA	NA	NA	NA	NA
reactome_Activation_of_NIMA_Kinases_NEK9_NEK6_NEK7_Main_Pathway	KEGG_Nucleotide_excision_repair_Main_Pathway	NA	NA	reactome_APC_C_Cdc20_mediated_degradation_of_Cyclin_B_Main_Pathway	NA	NA	NA	NA	NA	NA	NA	NA	NA	NA
reactome_Activation_of_NOXA_and_translocation_to_mitochondria_Main_Pathway	KEGG_One_carbon_pool_by_folate_Main_Pathway	NA	NA	reactome_APC_C_Cdc20_mediated_degradation_of_mitotic_proteins_Main_Pathway	NA	NA	NA	NA	NA	NA	NA	NA	NA	NA
reactome_Activation_of_PUMA_and_translocation_to_mitochondria_Main_Pathway	KEGG_Oocyte_meiosis_Main_Pathway	NA	NA	reactome_APC_Cdc20_mediated_degradation_of_Nek2A_Main_Pathway	NA	NA	NA	NA	NA	NA	NA	NA	NA	NA
reactome_Activation_of_the_pre_replicative_complex_Main_Pathway	KEGG_Osteoclast_differentiation_Main_Pathway	NA	NA	reactome_Apoptotic_cleavage_of_cellular_proteins_Main_Pathway	NA	NA	NA	NA	NA	NA	NA	NA	NA	NA
reactome_Amyloids_Main_Pathway	KEGG_Pantothenate_and_CoA_biosynthesis_Main_Pathway	NA	NA	reactome_Assembly_of_the_RAD51_ssDNA_nucleoprotein_complex_Main_Pathway	NA	NA	NA	NA	NA	NA	NA	NA	NA	NA
reactome_APC_C_Cdc20_mediated_degradation_of_Cyclin_B_Main_Pathway	KEGG_Pentose_and_glucuronate_interconversions_Main_Pathway	NA	NA	reactome_Astrocytic_Glutamate_Glutamine_Uptake_And_Metabolism_Main_Pathway	NA	NA	NA	NA	NA	NA	NA	NA	NA	NA
reactome_APC_C_Cdc20_mediated_degradation_of_mitotic_proteins_Main_Pathway	KEGG_Pentose_phosphate_Main_Pathway	NA	NA	reactome_ATM_mediated_phosphorylation_of_repair_proteins_Main_Pathway	NA	NA	NA	NA	NA	NA	NA	NA	NA	NA
reactome_APC_Cdc20_mediated_degradation_of_Nek2A_Main_Pathway	KEGG_Phenylalanine_metabolism_Main_Pathway	NA	NA	reactome_Autointegration_results_in_viral_DNA_circles_Main_Pathway	NA	NA	NA	NA	NA	NA	NA	NA	NA	NA
reactome_Apoptotic_cleavage_of_cellular_proteins_Main_Pathway	KEGG_Porphyrin_and_chlorophyll_metabolism_Main_Pathway	NA	NA	reactome_Beta_oxidation_of_butanoyl_CoA_to_acetyl_CoA_Main_Pathway	NA	NA	NA	NA	NA	NA	NA	NA	NA	NA
reactome_Assembly_of_the_RAD51_ssDNA_nucleoprotein_complex_Main_Pathway	KEGG_Progesterone_mediated_oocyte_maturation_Main_Pathway	NA	NA	reactome_CaMK_IV_mediated_phosphorylation_of_CREB_Main_Pathway	NA	NA	NA	NA	NA	NA	NA	NA	NA	NA
reactome_Astrocytic_Glutamate_Glutamine_Uptake_And_Metabolism_Main_Pathway	KEGG_Prostate_cancer_Main_Pathway	NA	NA	reactome_Carnitine_synthesis_Main_Pathway	NA	NA	NA	NA	NA	NA	NA	NA	NA	NA
reactome_ATM_mediated_phosphorylation_of_repair_proteins_Main_Pathway	KEGG_Purine_metabolism_Main_Pathway	NA	NA	reactome_CDC6_association_with_the_ORC_origin_complex_Main_Pathway	NA	NA	NA	NA	NA	NA	NA	NA	NA	NA
reactome_Autointegration_results_in_viral_DNA_circles_Main_Pathway	KEGG_Pyrimidine_metabolism_Main_Pathway	NA	NA	reactome_cell_division_Main_Pathway	NA	NA	NA	NA	NA	NA	NA	NA	NA	NA
reactome_Beta_oxidation_of_butanoyl_CoA_to_acetyl_CoA_Main_Pathway	KEGG_Ribosome_biogenesis_in_eukaryotes_Main_Pathway	NA	NA	reactome_Chk1_Chk2_Cds1_mediated_inactivation_of_Cyclin_B_Cdk1_complex_Main_Pathway	NA	NA	NA	NA	NA	NA	NA	NA	NA	NA
reactome_CaMK_IV_mediated_phosphorylation_of_CREB_Main_Pathway	KEGG_Ribosome_Main_Pathway	NA	NA	reactome_Cohesin_Loading_onto_Chromatin_Main_Pathway	NA	NA	NA	NA	NA	NA	NA	NA	NA	NA
reactome_Carnitine_synthesis_Main_Pathway	KEGG_RNA_degradation_Main_Pathway	NA	NA	reactome_Condensation_of_Prometaphase_Chromosomes_Main_Pathway	NA	NA	NA	NA	NA	NA	NA	NA	NA	NA
reactome_CDC6_association_with_the_ORC_origin_complex_Main_Pathway	KEGG_RNA_polymerase_Main_Pathway	NA	NA	reactome_Condensation_of_Prophase_Chromosomes_Main_Pathway	NA	NA	NA	NA	NA	NA	NA	NA	NA	NA
reactome_cell_division_Main_Pathway	KEGG_RNA_transport_Main_Pathway	NA	NA	reactome_CREB_phosphorylation_through_the_activation_of_CaMKK_Main_Pathway	NA	NA	NA	NA	NA	NA	NA	NA	NA	NA
reactome_Chk1_Chk2_Cds1_mediated_inactivation_of_Cyclin_B_Cdk1_complex_Main_Pathway	KEGG_Selenocompound_metabolism_Main_Pathway	NA	NA	reactome_CRMPs_in_Sema3A_signaling_Main_Pathway	NA	NA	NA	NA	NA	NA	NA	NA	NA	NA
reactome_Cohesin_Loading_onto_Chromatin_Main_Pathway	KEGG_Spliceosome_Main_Pathway	NA	NA	reactome_Cyclin_A_B1_associated_events_during_G2_M_transition_Main_Pathway	NA	NA	NA	NA	NA	NA	NA	NA	NA	NA
reactome_Condensation_of_Prometaphase_Chromosomes_Main_Pathway	KEGG_TGF_beta_signaling_Main_Pathway	NA	NA	reactome_Cyclin_A_Cdk2_associated_events_at_S_phase_entry_Main_Pathway	NA	NA	NA	NA	NA	NA	NA	NA	NA	NA
reactome_Condensation_of_Prophase_Chromosomes_Main_Pathway	KEGG_Transcriptional_misregulation_in_cancer_Main_Pathway	NA	NA	reactome_Cyclin_B2_mediated_events_Main_Pathway	NA	NA	NA	NA	NA	NA	NA	NA	NA	NA
reactome_CREB_phosphorylation_through_the_activation_of_CaMKK_Main_Pathway	KEGG_Tryptophan_metabolism_Main_Pathway	NA	NA	reactome_Deposition_of_new_CENPA_containing_nucleosomes_at_the_centromere_Main_Pathway	NA	NA	NA	NA	NA	NA	NA	NA	NA	NA
reactome_CRMPs_in_Sema3A_signaling_Main_Pathway	KEGG_Tuberculosis_Main_Pathway	NA	NA	reactome_DNA_Damage_Telomere_Stress_Induced_Senescence_Main_Pathway	NA	NA	NA	NA	NA	NA	NA	NA	NA	NA
reactome_Cyclin_A_B1_associated_events_during_G2_M_transition_Main_Pathway	KEGG_Ubiquinone_and_other_terpenoid_quinone_biosynthesis_Main_Pathway	NA	NA	reactome_DNA_replication_initiation_Main_Pathway	NA	NA	NA	NA	NA	NA	NA	NA	NA	NA
reactome_Cyclin_A_Cdk2_associated_events_at_S_phase_entry_Main_Pathway	KEGG_Ubiquitin_mediated_proteolysis_Main_Pathway	NA	NA	reactome_E2F_enabled_inhibition_of_pre_replication_complex_formation_Main_Pathway	NA	NA	NA	NA	NA	NA	NA	NA	NA	NA
reactome_Cyclin_B2_mediated_events_Main_Pathway	KEGG_Vasopressin_regulated_water_reabsorption_Main_Pathway	NA	NA	reactome_E2F_mediated_regulation_of_DNA_replication_Main_Pathway	NA	NA	NA	NA	NA	NA	NA	NA	NA	NA
reactome_Deposition_of_new_CENPA_containing_nucleosomes_at_the_centromere_Main_Pathway	KEGG_Viral_carcinogenesis_Main_Pathway	NA	NA	reactome_Early_Phase_of_HIV_Life_Cycle_Main_Pathway	NA	NA	NA	NA	NA	NA	NA	NA	NA	NA
reactome_DNA_Damage_Telomere_Stress_Induced_Senescence_Main_Pathway	KEGG_Vitamin_digestion_and_absorption_Main_Pathway	NA	NA	reactome_ERK1_activation_Main_Pathway	NA	NA	NA	NA	NA	NA	NA	NA	NA	NA
reactome_DNA_replication_initiation_Main_Pathway	MAPK_Family_Pathway_Chromatin_Remodelling	NA	NA	reactome_Establishment_of_Sister_Chromatid_Cohesion_Main_Pathway	NA	NA	NA	NA	NA	NA	NA	NA	NA	NA
reactome_E2F_enabled_inhibition_of_pre_replication_complex_formation_Main_Pathway	MAPK_Signaling_Pathway_Cell_Survival	NA	NA	reactome_Eukaryotic_Translation_Elongation_Main_Pathway	NA	NA	NA	NA	NA	NA	NA	NA	NA	NA
reactome_E2F_mediated_regulation_of_DNA_replication_Main_Pathway	Mismatch_Repair_in_Eukaryotes_Pathway	NA	NA	reactome_Fanconi_Anemia_Main_Pathway	NA	NA	NA	NA	NA	NA	NA	NA	NA	NA
reactome_Early_Phase_of_HIV_Life_Cycle_Main_Pathway	mTOR_Pathway_Cap-dependent_Translation	NA	NA	reactome_Fatty_Acyl_CoA_Biosynthesis_Main_Pathway	NA	NA	NA	NA	NA	NA	NA	NA	NA	NA
reactome_ERK1_activation_Main_Pathway	mTOR_Pathway_mRNA_Biogenesis	NA	NA	reactome_Formation_of_Senescence_Associated_Heterochromatin_Foci_SAHF__Main_Pathway	NA	NA	NA	NA	NA	NA	NA	NA	NA	NA
reactome_Establishment_of_Sister_Chromatid_Cohesion_Main_Pathway	NCI_ALK2_signaling_events_Main_Pathway	NA	NA	reactome_formation_of_the_beta_catenin_TCF_transactivating_complex_Main_Pathway	NA	NA	NA	NA	NA	NA	NA	NA	NA	NA
reactome_Eukaryotic_Translation_Elongation_Main_Pathway	NCI_Alpha_synuclein_signaling_Main_Pathway	NA	NA	reactome_G1_S_Specific_Transcription_Main_Pathway	NA	NA	NA	NA	NA	NA	NA	NA	NA	NA
reactome_Fanconi_Anemia_Main_Pathway	NCI_Alpha_synuclein_signaling_Pathway_(cell_death)	NA	NA	reactome_G2_M_DNA_replication_checkpoint_Main_Pathway	NA	NA	NA	NA	NA	NA	NA	NA	NA	NA
reactome_Fatty_Acyl_CoA_Biosynthesis_Main_Pathway	NCI_Alpha_synuclein_signaling_Pathway_(proteasomal_ubiquitin_dependent_protein_catabolic_process)	NA	NA	reactome_G2_Phase_Main_Pathway	NA	NA	NA	NA	NA	NA	NA	NA	NA	NA
reactome_Formation_of_Senescence_Associated_Heterochromatin_Foci_SAHF__Main_Pathway	NCI_amb2_Integrin_signaling_Pathway_(leukocyte_adhesion)	NA	NA	reactome_HATs_acetylate_histones_Main_Pathway	NA	NA	NA	NA	NA	NA	NA	NA	NA	NA
reactome_formation_of_the_beta_catenin_TCF_transactivating_complex_Main_Pathway	NCI_Arf6_signaling_events_Main_Pathway	NA	NA	reactome_HDACs_deacetylate_histones_Main_Pathway	NA	NA	NA	NA	NA	NA	NA	NA	NA	NA
reactome_G1_S_Specific_Transcription_Main_Pathway	NCI_ATM_Main_Pathway	NA	NA	reactome_HuR_stabilizes_mRNA_Main_Pathway	NA	NA	NA	NA	NA	NA	NA	NA	NA	NA
reactome_G2_M_DNA_replication_checkpoint_Main_Pathway	NCI_ATM_Pathway_(chromatin_remodeling)	NA	NA	reactome_Inactivation_of_APC_C_via_direct_inhibition_of_the_APC_C_complex_Main_Pathway	NA	NA	NA	NA	NA	NA	NA	NA	NA	NA
reactome_G2_Phase_Main_Pathway	NCI_ATM_Pathway_(double_strand_break_repair_via_nonhomologous_end_joining)	NA	NA	reactome_Inhibition_of_replication_initiation_of_damaged_DNA_by_RB1_E2F1_Main_Pathway	NA	NA	NA	NA	NA	NA	NA	NA	NA	NA
reactome_HATs_acetylate_histones_Main_Pathway	NCI_ATM_Pathway_(G1_S_transition_checkpoint)	NA	NA	reactome_Integration_of_viral_DNA_into_host_genomic_DNA_Main_Pathway	NA	NA	NA	NA	NA	NA	NA	NA	NA	NA
reactome_HDACs_deacetylate_histones_Main_Pathway	NCI_ATM_Pathway_(G2_M_transition_checkpoint)	NA	NA	reactome_Kinesins_Main_Pathway	NA	NA	NA	NA	NA	NA	NA	NA	NA	NA
reactome_HuR_stabilizes_mRNA_Main_Pathway	NCI_ATM_Pathway_(Pathway_rRNA_transcription_via_ATM)	NA	NA	reactome_KSRP_destabilizes_mRNA_Main_Pathway	NA	NA	NA	NA	NA	NA	NA	NA	NA	NA
reactome_Hypusinylation_Main_Pathway	NCI_ATR_signaling_Main_Pathway	NA	NA	reactome_Leading_Strand_Synthesis_Main_Pathway	NA	NA	NA	NA	NA	NA	NA	NA	NA	NA
reactome_Inactivation_of_APC_C_via_direct_inhibition_of_the_APC_C_complex_Main_Pathway	NCI_ATR_signaling_Pathway_(Pathway_negative_regulation_of_transcription_during_mitosis_via_CHEK1)	NA	NA	reactome_Meiotic_recombination_Main_Pathway	NA	NA	NA	NA	NA	NA	NA	NA	NA	NA
reactome_Inhibition_of_replication_initiation_of_damaged_DNA_by_RB1_E2F1_Main_Pathway	NCI_ATR_signaling_Pathway_(regulation_of_double_strand_break_repair_via_homologous_recombination)	NA	NA	reactome_Meiotic_synapsis_Main_Pathway	NA	NA	NA	NA	NA	NA	NA	NA	NA	NA
reactome_Integration_of_viral_DNA_into_host_genomic_DNA_Main_Pathway	NCI_ATR_signaling_Pathway_(response_to_G2_M_transition_DNA_damage_checkpoint_signal)	NA	NA	reactome_Metabolism_of_folate_and_pterines_Main_Pathway	NA	NA	NA	NA	NA	NA	NA	NA	NA	NA
reactome_Interconversion_of_2_oxoglutarate_and_2_hydroxyglutarate_Main_Pathway	NCI_Atypical_NF_kappaB_Main_Pathway	NA	NA	reactome_Mismatch_repair_MMR_directed_by_MSH2_MSH3_MutSbeta__Main_Pathway	NA	NA	NA	NA	NA	NA	NA	NA	NA	NA
reactome_Kinesins_Main_Pathway	NCI_Atypical_NF_kappaB_Pathway_(Pathway_degradation_of_NFKB1_NFKBIA)	NA	NA	reactome_Mismatch_repair_MMR_directed_by_MSH2_MSH6_MutSalpha__Main_Pathway	NA	NA	NA	NA	NA	NA	NA	NA	NA	NA
reactome_KSRP_destabilizes_mRNA_Main_Pathway	NCI_Atypical_NF_kappaB_Pathway_(Pathway_degradation_of_NFKBIA)	NA	NA	reactome_Mitochondrial_transcription_initiation_Main_Pathway	NA	NA	NA	NA	NA	NA	NA	NA	NA	NA
reactome_Leading_Strand_Synthesis_Main_Pathway	NCI_Atypical_NF_kappaB_Pathway_(positive_regulation_of_anti_apoptosis)	NA	NA	reactome_Mitotic_Prometaphase_Main_Pathway	NA	NA	NA	NA	NA	NA	NA	NA	NA	NA
reactome_Meiotic_recombination_Main_Pathway	NCI_Aurora_A_signaling_Main_Pathway	NA	NA	reactome_mRNA_decay_by_3_to_5_exoribonuclease_Main_Pathway	NA	NA	NA	NA	NA	NA	NA	NA	NA	NA
reactome_Meiotic_synapsis_Main_Pathway	NCI_Aurora_A_signaling_Pathway_(centrosome_duplication)	NA	NA	reactome_negative_regulation_of_TCF_dependent_signaling_by_DVL_interacting_proteins_Main_Pathway	NA	NA	NA	NA	NA	NA	NA	NA	NA	NA
reactome_Metabolism_of_folate_and_pterines_Main_Pathway	NCI_Aurora_A_signaling_Pathway_(negative_regulation_of_DNA_binding)	NA	NA	reactome_NEP_NS2_Interacts_with_the_Cellular_Export_Machinery_Main_Pathway	NA	NA	NA	NA	NA	NA	NA	NA	NA	NA
reactome_Mismatch_repair_MMR_directed_by_MSH2_MSH3_MutSbeta__Main_Pathway	NCI_Aurora_A_signaling_Pathway_(proteasomal_ubiquitin_dependent_protein_catabolic_process)	NA	NA	reactome_NoRC_negatively_regulates_rRNA_expression_Main_Pathway	NA	NA	NA	NA	NA	NA	NA	NA	NA	NA
reactome_Mismatch_repair_MMR_directed_by_MSH2_MSH6_MutSalpha__Main_Pathway	NCI_Aurora_A_signaling_Pathway_(protein_catabolic_process)	NA	NA	reactome_Nuclear_import_of_Rev_protein_Main_Pathway	NA	NA	NA	NA	NA	NA	NA	NA	NA	NA
reactome_Mitochondrial_transcription_initiation_Main_Pathway	NCI_Aurora_A_signaling_Pathway_(regulation_of_centrosome_cycle)	NA	NA	reactome_Nuclear_Pore_Complex_NPC_Disassembly_Main_Pathway	NA	NA	NA	NA	NA	NA	NA	NA	NA	NA
reactome_Mitotic_Prometaphase_Main_Pathway	NCI_Aurora_A_signaling_Pathway_(spindle_assembly)	NA	NA	reactome_Orc1_removal_from_chromatin_Main_Pathway	NA	NA	NA	NA	NA	NA	NA	NA	NA	NA
reactome_mRNA_decay_by_3_to_5_exoribonuclease_Main_Pathway	NCI_Aurora_B_signaling_Main_Pathway	NA	NA	reactome_Packaging_Of_Telomere_Ends_Main_Pathway	NA	NA	NA	NA	NA	NA	NA	NA	NA	NA
reactome_negative_regulation_of_TCF_dependent_signaling_by_DVL_interacting_proteins_Main_Pathway	NCI_Aurora_B_signaling_Pathway_(cytokinesis)	NA	NA	reactome_Phosphorylation_of_Emi1_Main_Pathway	NA	NA	NA	NA	NA	NA	NA	NA	NA	NA
reactome_NEP_NS2_Interacts_with_the_Cellular_Export_Machinery_Main_Pathway	NCI_Aurora_C_signaling_Main_Pathway	NA	NA	reactome_Phosphorylation_of_proteins_involved_in_the_G2_M_transition_by_Cyclin_A_Cdc2_complexes_Main_Pathway	NA	NA	NA	NA	NA	NA	NA	NA	NA	NA
reactome_NoRC_negatively_regulates_rRNA_expression_Main_Pathway	NCI_BARD1_signaling_events_Main_Pathway	NA	NA	reactome_Phosphorylation_of_the_APC_C_Main_Pathway	NA	NA	NA	NA	NA	NA	NA	NA	NA	NA
reactome_Nuclear_import_of_Rev_protein_Main_Pathway	NCI_BARD1_signaling_events_Pathway_(DNA_damage_checkpoint)	NA	NA	reactome_Polo_like_kinase_mediated_events_Main_Pathway	NA	NA	NA	NA	NA	NA	NA	NA	NA	NA
reactome_Nuclear_Pore_Complex_NPC_Disassembly_Main_Pathway	NCI_BARD1_signaling_events_Pathway_(DNA_repair)	NA	NA	reactome_Polymerase_switching_Main_Pathway	NA	NA	NA	NA	NA	NA	NA	NA	NA	NA
reactome_Orc1_removal_from_chromatin_Main_Pathway	NCI_BARD1_signaling_events_Pathway_(protein_ubiquitination)	NA	NA	reactome_Polymerase_switching_on_the_C_strand_of_the_telomere_Main_Pathway	NA	NA	NA	NA	NA	NA	NA	NA	NA	NA
reactome_Packaging_Of_Telomere_Ends_Main_Pathway	NCI_BMP_receptor_signaling_Main_Pathway	NA	NA	reactome_PRC2_methylates_histones_and_DNA_Main_Pathway	NA	NA	NA	NA	NA	NA	NA	NA	NA	NA
reactome_Phosphorylation_of_Emi1_Main_Pathway	NCI_C_MYB_transcription_factor_network_Main_Pathway	NA	NA	reactome_pre_mRNA_splicing_Main_Pathway	NA	NA	NA	NA	NA	NA	NA	NA	NA	NA
reactome_Phosphorylation_of_proteins_involved_in_the_G2_M_transition_by_Cyclin_A_Cdc2_complexes_Main_Pathway	NCI_C_MYC_Main_Pathway	NA	NA	reactome_Presynaptic_phase_of_homologous_DNA_pairing_and_strand_exchange_Main_Pathway	NA	NA	NA	NA	NA	NA	NA	NA	NA	NA
reactome_Phosphorylation_of_the_APC_C_Main_Pathway	NCI_Calcineurin_regulated_NFAT_dependent_transcription_in_lymphocytes_Main_Pathway	NA	NA	reactome_Processing_of_DNA_double_strand_break_ends_Main_Pathway	NA	NA	NA	NA	NA	NA	NA	NA	NA	NA
reactome_Polo_like_kinase_mediated_events_Main_Pathway	NCI_Caspase_Cascade_in_Apoptosis_Pathway_(actin_filament_polymerization)	NA	NA	reactome_Processing_of_DNA_ends_prior_to_end_rejoining_Main_Pathway	NA	NA	NA	NA	NA	NA	NA	NA	NA	NA
reactome_Polymerase_switching_Main_Pathway	NCI_Caspase_Cascade_in_Apoptosis_Pathway_(DNA_fragmentation_during_apoptosis)	NA	NA	reactome_Processive_synthesis_on_the_C_strand_of_the_telomere_Main_Pathway	NA	NA	NA	NA	NA	NA	NA	NA	NA	NA
reactome_Polymerase_switching_on_the_C_strand_of_the_telomere_Main_Pathway	NCI_Caspase_Cascade_in_Apoptosis_Pathway_(DNA_repair)	NA	NA	reactome_Processive_synthesis_on_the_lagging_strand_Main_Pathway	NA	NA	NA	NA	NA	NA	NA	NA	NA	NA
reactome_PRC2_methylates_histones_and_DNA_Main_Pathway	NCI_Caspase_Cascade_in_Apoptosis_Pathway_(neuron_apoptosis)	NA	NA	reactome_Purine_ribonucleoside_monophosphate_biosynthesis_Main_Pathway	NA	NA	NA	NA	NA	NA	NA	NA	NA	NA
reactome_pre_mRNA_splicing_Main_Pathway	NCI_Caspase_Cascade_in_Apoptosis_Pathway_(nuclear_fragmentation_during_apoptosis)	NA	NA	reactome_Pyrimidine_biosynthesis_Main_Pathway	NA	NA	NA	NA	NA	NA	NA	NA	NA	NA
reactome_Presynaptic_phase_of_homologous_DNA_pairing_and_strand_exchange_Main_Pathway	NCI_Caspase_Cascade_in_Apoptosis_Pathway_(positive_regulation_of_apoptosis)	NA	NA	reactome_Pyrimidine_salvage_reactions_Main_Pathway	NA	NA	NA	NA	NA	NA	NA	NA	NA	NA
reactome_Processing_of_DNA_double_strand_break_ends_Main_Pathway	NCI_CDC42_signaling_events_Pathway_(neuron_projection_development)	NA	NA	reactome_Recruitment_of_NuMA_to_mitotic_centrosomes_Main_Pathway	NA	NA	NA	NA	NA	NA	NA	NA	NA	NA
reactome_Processing_of_DNA_ends_prior_to_end_rejoining_Main_Pathway	NCI_CDC42_signaling_events_Pathway_(regulation_of_filopodium_assembly)	NA	NA	reactome_Recruitment_of_repair_and_signaling_proteins_to_double_strand_breaks_Main_Pathway	NA	NA	NA	NA	NA	NA	NA	NA	NA	NA
reactome_Processive_synthesis_on_the_C_strand_of_the_telomere_Main_Pathway	NCI_Ceramide_signaling_Pathway_(cell_survival)	NA	NA	reactome_Regulation_of_APC_C_activators_between_G1_S_and_early_anaphase_Main_Pathway	NA	NA	NA	NA	NA	NA	NA	NA	NA	NA
reactome_Processive_synthesis_on_the_lagging_strand_Main_Pathway	NCI_Circadian_rhythm_Main_Pathway	NA	NA	reactome_Regulation_of_Glucokinase_by_Glucokinase_Regulatory_Protein_Main_Pathway	NA	NA	NA	NA	NA	NA	NA	NA	NA	NA
reactome_Purine_ribonucleoside_monophosphate_biosynthesis_Main_Pathway	NCI_Circadian_rhythm_Pathway_(chromatin_modification)	NA	NA	reactome_Removal_of_DNA_patch_containing_abasic_residue_Main_Pathway	NA	NA	NA	NA	NA	NA	NA	NA	NA	NA
reactome_Pyrimidine_biosynthesis_Main_Pathway	NCI_Circadian_rhythm_Pathway_(S_phase_of_mitotic_cell_cycle)	NA	NA	reactome_Removal_of_the_Flap_Intermediate_from_the_C_strand_Main_Pathway	NA	NA	NA	NA	NA	NA	NA	NA	NA	NA
reactome_Pyrimidine_salvage_reactions_Main_Pathway	NCI_Class_I_PI3K_signaling_events_mediated_by_Akt_Pathway_(glucose_import)	NA	NA	reactome_Removal_of_the_Flap_Intermediate_Main_Pathway	NA	NA	NA	NA	NA	NA	NA	NA	NA	NA
reactome_Recruitment_of_NuMA_to_mitotic_centrosomes_Main_Pathway	NCI_Class_IB_PI3K_non_lipid_kinase_events_Main_Pathway	NA	NA	reactome_Repair_synthesis_for_gap_filling_by_DNA_polymerase_in_TC_NER_Main_Pathway	NA	NA	NA	NA	NA	NA	NA	NA	NA	NA
reactome_Recruitment_of_repair_and_signaling_proteins_to_double_strand_breaks_Main_Pathway	NCI_Class_IB_PI3K_non_lipid_kinase_events_Pathway_(cAMP_biosynthetic_process)	NA	NA	reactome_Repair_synthesis_of_patch_27_30_bases_long_by_DNA_polymerase_Main_Pathway	NA	NA	NA	NA	NA	NA	NA	NA	NA	NA
reactome_Regulation_of_APC_C_activators_between_G1_S_and_early_anaphase_Main_Pathway	NCI_CXCR3_mediated_signaling_events_Main_Pathway	NA	NA	reactome_repression_of_WNT_target_genes_Main_Pathway	NA	NA	NA	NA	NA	NA	NA	NA	NA	NA
reactome_Regulation_of_Glucokinase_by_Glucokinase_Regulatory_Protein_Main_Pathway	NCI_CXCR3_mediated_signaling_events_Pathway_(actin_polymerization_or_depolymerization)	NA	NA	reactome_Resolution_of_AP_sites_via_the_multiple_nucleotide_patch_replacement_Main_Pathway	NA	NA	NA	NA	NA	NA	NA	NA	NA	NA
reactome_Removal_of_DNA_patch_containing_abasic_residue_Main_Pathway	NCI_CXCR3_mediated_signaling_events_Pathway_(cell_adhesion)	NA	NA	reactome_Resolution_of_AP_sites_via_the_single_nucleotide_replacement_Main_Pathway	NA	NA	NA	NA	NA	NA	NA	NA	NA	NA
reactome_Removal_of_the_Flap_Intermediate_from_the_C_strand_Main_Pathway	NCI_CXCR3_mediated_signaling_events_Pathway_(cell_proliferation)	NA	NA	reactome_Resolution_of_Sister_Chromatid_Cohesion_Main_Pathway	NA	NA	NA	NA	NA	NA	NA	NA	NA	NA
reactome_Removal_of_the_Flap_Intermediate_Main_Pathway	NCI_CXCR3_mediated_signaling_events_Pathway_(chemotaxis)	NA	NA	reactome_Rev_mediated_nuclear_export_of_HIV_RNA_Main_Pathway	NA	NA	NA	NA	NA	NA	NA	NA	NA	NA
reactome_Repair_synthesis_for_gap_filling_by_DNA_polymerase_in_TC_NER_Main_Pathway	NCI_CXCR4_mediated_signaling_events_Main_Pathway	NA	NA	reactome_RMTs_methylate_histone_arginines_Main_Pathway	NA	NA	NA	NA	NA	NA	NA	NA	NA	NA
reactome_Repair_synthesis_of_patch_27_30_bases_long_by_DNA_polymerase_Main_Pathway	NCI_CXCR4_mediated_signaling_events_Pathway_(cell_adhesion)	NA	NA	reactome_RNA_Polymerase_I_Chain_Elongation_Main_Pathway	NA	NA	NA	NA	NA	NA	NA	NA	NA	NA
reactome_repression_of_WNT_target_genes_Main_Pathway	NCI_CXCR4_mediated_signaling_events_Pathway_(cell_proliferation)	NA	NA	reactome_Role_of_second_messengers_in_netrin_1_signaling_Main_Pathway	NA	NA	NA	NA	NA	NA	NA	NA	NA	NA
reactome_Resolution_of_AP_sites_via_the_multiple_nucleotide_patch_replacement_Main_Pathway	NCI_CXCR4_mediated_signaling_events_Pathway_(chemotaxis)	NA	NA	reactome_Senescence_Associated_Secretory_Phenotype_SASP__Main_Pathway	NA	NA	NA	NA	NA	NA	NA	NA	NA	NA
reactome_Resolution_of_AP_sites_via_the_single_nucleotide_replacement_Main_Pathway	NCI_CXCR4_mediated_signaling_events_Pathway_(establishment_of_cell_polarity)	NA	NA	reactome_Separation_of_Sister_Chromatids_Main_Pathway	NA	NA	NA	NA	NA	NA	NA	NA	NA	NA
reactome_Resolution_of_Sister_Chromatid_Cohesion_Main_Pathway	NCI_CXCR4_mediated_signaling_events_Pathway_(regulation_of_heterotypic_cell_cell_adhesion)	NA	NA	reactome_SIRT1_negatively_regulates_rRNA_Expression_Main_Pathway	NA	NA	NA	NA	NA	NA	NA	NA	NA	NA
reactome_Rev_mediated_nuclear_export_of_HIV_RNA_Main_Pathway	NCI_DNA_PK_pathway_in_nonhomologous_end_joining_Main_Pathway	NA	NA	reactome_SLBP_Dependent_Processing_of_Replication_Dependent_Histone_Pre_mRNAs_Main_Pathway	NA	NA	NA	NA	NA	NA	NA	NA	NA	NA
reactome_RMTs_methylate_histone_arginines_Main_Pathway	NCI_DNA_PK_pathway_in_nonhomologous_end_joining_Pathway_(double_strand_break_repair_via_homologous_recombination)	NA	NA	reactome_SLBP_independent_Processing_of_Histone_Pre_mRNAs_Main_Pathway	NA	NA	NA	NA	NA	NA	NA	NA	NA	NA
reactome_RNA_Polymerase_I_Chain_Elongation_Main_Pathway	NCI_DNA_PK_pathway_in_nonhomologous_end_joining_Pathway_(double_strand_break_repair_via_nonhomologous_end_joining)	NA	NA	reactome_snRNP_Assembly_Main_Pathway	NA	NA	NA	NA	NA	NA	NA	NA	NA	NA
reactome_Role_of_second_messengers_in_netrin_1_signaling_Main_Pathway	NCI_DNA_PK_pathway_in_nonhomologous_end_joining_Pathway_(immunoglobulin_heavy_chain_V_D_J_recombination)	NA	NA	reactome_Sodium_Proton_exchangers_Main_Pathway	NA	NA	NA	NA	NA	NA	NA	NA	NA	NA
reactome_Senescence_Associated_Secretory_Phenotype_SASP__Main_Pathway	NCI_DNA_PK_pathway_in_nonhomologous_end_joining_Pathway_(immunoglobulin_light_chain_V_J_recombination)	NA	NA	reactome_SUMO_is_conjugated_to_E1_UBA2_SAE1__Main_Pathway	NA	NA	NA	NA	NA	NA	NA	NA	NA	NA
reactome_Separation_of_Sister_Chromatids_Main_Pathway	NCI_DNA_PK_pathway_in_nonhomologous_end_joining_Pathway_(V_D_J_recombination)	NA	NA	reactome_SUMO_is_proteolytically_processed_Main_Pathway	NA	NA	NA	NA	NA	NA	NA	NA	NA	NA
reactome_SIRT1_negatively_regulates_rRNA_Expression_Main_Pathway	NCI_E_cadherin_signaling_in_the_nascent_adherens_junction_Pathway_(actin_cytoskeleton_organization)	NA	NA	reactome_SUMO_is_transferred_from_E1_to_E2_UBE2I_UBC9__Main_Pathway	NA	NA	NA	NA	NA	NA	NA	NA	NA	NA
reactome_SLBP_Dependent_Processing_of_Replication_Dependent_Histone_Pre_mRNAs_Main_Pathway	NCI_Endogenous_TLR_signaling_Pathway_(regulation_of_cell_adhesion)	NA	NA	reactome_Switching_of_origins_to_a_post_replicative_state_Main_Pathway	NA	NA	NA	NA	NA	NA	NA	NA	NA	NA
reactome_SLBP_independent_Processing_of_Histone_Pre_mRNAs_Main_Pathway	NCI_Endothelins_Pathway_(arachidonic_acid_secretion)	NA	NA	reactome_Synthesis_of_16_20_hydroxyeicosatetraenoic_acids_HETE__Main_Pathway	NA	NA	NA	NA	NA	NA	NA	NA	NA	NA
reactome_snRNP_Assembly_Main_Pathway	NCI_Ephrin_B_reverse_signaling_Pathway_(endothelial_cell_proliferation)	NA	NA	reactome_Synthesis_of_PIPs_at_the_late_endosome_membrane_Main_Pathway	NA	NA	NA	NA	NA	NA	NA	NA	NA	NA
reactome_Sodium_Proton_exchangers_Main_Pathway	NCI_ErbB2_ErbB3_signaling_events_Pathway_(apoptosis)	NA	NA	reactome_Telomere_C_strand_Lagging_Strand_Synthesis_Main_Pathway	NA	NA	NA	NA	NA	NA	NA	NA	NA	NA
reactome_SUMO_is_conjugated_to_E1_UBA2_SAE1__Main_Pathway	NCI_Fanconi_anemia_Main_Pathway	NA	NA	reactome_Telomere_C_strand_synthesis_initiation_Main_Pathway	NA	NA	NA	NA	NA	NA	NA	NA	NA	NA
reactome_SUMO_is_proteolytically_processed_Main_Pathway	NCI_Fanconi_anemia_Pathway_(DNA_repair)	NA	NA	reactome_Telomere_Extension_By_Telomerase_Main_Pathway	NA	NA	NA	NA	NA	NA	NA	NA	NA	NA
reactome_SUMO_is_transferred_from_E1_to_E2_UBE2I_UBC9__Main_Pathway	NCI_Fanconi_anemia_Pathway_(G1_S_transition_checkpoint)	NA	NA	reactome_Toxicity_of_botulinum_toxin_type_C_BoNT_C__Main_Pathway	NA	NA	NA	NA	NA	NA	NA	NA	NA	NA
reactome_Switching_of_origins_to_a_post_replicative_state_Main_Pathway	NCI_Fanconi_anemia_Pathway_(regulation_of_double_strand_break_repair_via_homologous_recombination)	NA	NA	reactome_Toxicity_of_botulinum_toxin_type_E_BoNT_E__Main_Pathway	NA	NA	NA	NA	NA	NA	NA	NA	NA	NA
reactome_Synthesis_of_16_20_hydroxyeicosatetraenoic_acids_HETE__Main_Pathway	NCI_Fanconi_anemia_Pathway_(Sister_Chromatid_Exchange_Process)	NA	NA	reactome_Transcriptional_activation_of_mitochondrial_biogenesis_Main_Pathway	NA	NA	NA	NA	NA	NA	NA	NA	NA	NA
reactome_Synthesis_of_PIPs_at_the_late_endosome_membrane_Main_Pathway	NCI_FAS_CD95_signaling_Pathway_(cell_cycle)	NA	NA	reactome_Transport_of_Mature_mRNA_derived_from_an_Intron_Containing_Transcript_Main_Pathway	NA	NA	NA	NA	NA	NA	NA	NA	NA	NA
reactome_Telomere_C_strand_Lagging_Strand_Synthesis_Main_Pathway	NCI_FGF_signaling_Pathway_(cell_migration)	NA	NA	reactome_Transport_of_Mature_mRNA_Derived_from_an_Intronless_Transcript_Main_Pathway	NA	NA	NA	NA	NA	NA	NA	NA	NA	NA
reactome_Telomere_C_strand_synthesis_initiation_Main_Pathway	NCI_FGF_signaling_Pathway_(negative_regulation_of_apoptosis)	NA	NA	reactome_Transport_of_Ribonucleoproteins_into_the_Host_Nucleus_Main_Pathway	NA	NA	NA	NA	NA	NA	NA	NA	NA	NA
reactome_Telomere_Extension_By_Telomerase_Main_Pathway	NCI_FOXM1_transcription_factor_network_Main_Pathway	NA	NA	reactome_Transport_of_the_SLBP_Dependant_Mature_mRNA_Main_Pathway	NA	NA	NA	NA	NA	NA	NA	NA	NA	NA
reactome_Toxicity_of_botulinum_toxin_type_C_BoNT_C__Main_Pathway	NCI_Glucocorticoid_receptor_regulatory_network_Pathway_(apoptosis)	NA	NA	reactome_Transport_of_the_SLBP_independent_Mature_mRNA_Main_Pathway	NA	NA	NA	NA	NA	NA	NA	NA	NA	NA
reactome_Toxicity_of_botulinum_toxin_type_E_BoNT_E__Main_Pathway	NCI_Glucocorticoid_receptor_regulatory_network_Pathway_(histone_acetylation)	NA	NA	reactome_Transport_of_vitamins_nucleosides_and_related_molecules_Main_Pathway	NA	NA	NA	NA	NA	NA	NA	NA	NA	NA
reactome_Transcriptional_activation_of_mitochondrial_biogenesis_Main_Pathway	NCI_Glucocorticoid_receptor_regulatory_network_Pathway_(MAPKKK_cascade)	NA	NA	reactome_Ubiquinol_biosynthesis_Main_Pathway	NA	NA	NA	NA	NA	NA	NA	NA	NA	NA
reactome_Transport_of_Mature_mRNA_derived_from_an_Intron_Containing_Transcript_Main_Pathway	NCI_Glypican_2_network_Main_Pathway	NA	NA	reactome_Unwinding_of_DNA_Main_Pathway	NA	NA	NA	NA	NA	NA	NA	NA	NA	NA
reactome_Transport_of_Mature_mRNA_Derived_from_an_Intronless_Transcript_Main_Pathway	NCI_HIF_1_alpha_transcription_factor_network_Main_Pathway	NA	NA	reactome_Vitamin_B5_pantothenate_metabolism_Main_Pathway	NA	NA	NA	NA	NA	NA	NA	NA	NA	NA
reactome_Transport_of_Ribonucleoproteins_into_the_Host_Nucleus_Main_Pathway	NCI_HIF_2_alpha_transcription_factor_network_Main_Pathway	NA	NA	reactome_Vpr_mediated_nuclear_import_of_PICs_Main_Pathway	NA	NA	NA	NA	NA	NA	NA	NA	NA	NA
reactome_Transport_of_the_SLBP_Dependant_Mature_mRNA_Main_Pathway	NCI_HIF_2_alpha_transcription_factor_network_Pathway_(neuron_apoptosis)	NA	NA	reactome_WNT5A_dependent_internalization_of_FZD2_FZD5_and_ROR2_Main_Pathway	NA	NA	NA	NA	NA	NA	NA	NA	NA	NA
reactome_Transport_of_the_SLBP_independent_Mature_mRNA_Main_Pathway	NCI_HIV_1_Nef_Negative_effector_of_Fas_and_TNF_alpha_Main_Pathway	NA	NA	reactome_WNT5A_dependent_internalization_of_FZD4_Main_Pathway	NA	NA	NA	NA	NA	NA	NA	NA	NA	NA
reactome_Transport_of_vitamins_nucleosides_and_related_molecules_Main_Pathway	NCI_HIV_1_Nef_Negative_effector_of_Fas_and_TNF_alpha_Pathway_(Pathway_degradation_of_CASP3_CASP7_CASP6)	NA	NA	NA	NA	NA	NA	NA	NA	NA	NA	NA	NA	NA
reactome_Ubiquinol_biosynthesis_Main_Pathway	NCI_HIV_1_Nef_Negative_effector_of_Fas_and_TNF_alpha_Pathway_(protein_ubiquitination)	NA	NA	NA	NA	NA	NA	NA	NA	NA	NA	NA	NA	NA
reactome_Unwinding_of_DNA_Main_Pathway	NCI_Hypoxic_and_oxygen_homeostasis_regulation_of_HIF_1_alpha_Main_Pathway	NA	NA	NA	NA	NA	NA	NA	NA	NA	NA	NA	NA	NA
reactome_Vitamin_B5_pantothenate_metabolism_Main_Pathway	NCI_IL2_mediated_signaling_events_Pathway_(G1_S_transition_of_mitotic_cell_cycle)	NA	NA	NA	NA	NA	NA	NA	NA	NA	NA	NA	NA	NA
reactome_Vpr_mediated_induction_of_apoptosis_by_mitochondrial_outer_membrane_permeabilization_Main_Pathway	NCI_IL3_mediated_signaling_events_Main_Pathway	NA	NA	NA	NA	NA	NA	NA	NA	NA	NA	NA	NA	NA
reactome_Vpr_mediated_nuclear_import_of_PICs_Main_Pathway	NCI_IL8_and_CXCR1_mediated_signaling_events_Main_Pathway	NA	NA	NA	NA	NA	NA	NA	NA	NA	NA	NA	NA	NA
reactome_WNT5A_dependent_internalization_of_FZD2_FZD5_and_ROR2_Main_Pathway	NCI_IL8_and_CXCR1_mediated_signaling_events_Pathway_(basophil_degranulation)	NA	NA	NA	NA	NA	NA	NA	NA	NA	NA	NA	NA	NA
reactome_WNT5A_dependent_internalization_of_FZD4_Main_Pathway	NCI_IL8_and_CXCR1_mediated_signaling_events_Pathway_(cAMP_biosynthetic_process)	NA	NA	NA	NA	NA	NA	NA	NA	NA	NA	NA	NA	NA
NA	NCI_IL8_and_CXCR2_mediated_signaling_events_Main_Pathway	NA	NA	NA	NA	NA	NA	NA	NA	NA	NA	NA	NA	NA
NA	NCI_IL8_and_CXCR2_mediated_signaling_events_Pathway_(cAMP_biosynthetic_process)	NA	NA	NA	NA	NA	NA	NA	NA	NA	NA	NA	NA	NA
NA	NCI_IL8_and_CXCR2_mediated_signaling_events_Pathway_(Pathway_degradation_of_CXCL8)	NA	NA	NA	NA	NA	NA	NA	NA	NA	NA	NA	NA	NA
NA	NCI_Insulin_Pathway_Main_Pathway	NA	NA	NA	NA	NA	NA	NA	NA	NA	NA	NA	NA	NA
NA	NCI_Integrin_linked_kinase_signaling_Pathway_(centrosome_localization)	NA	NA	NA	NA	NA	NA	NA	NA	NA	NA	NA	NA	NA
NA	NCI_Integrin_linked_kinase_signaling_Pathway_(DNA_biosynthetic_process)	NA	NA	NA	NA	NA	NA	NA	NA	NA	NA	NA	NA	NA
NA	NCI_Lissencephaly_gene_LIS1_in_neuronal_migration_and_development_Main_Pathway	NA	NA	NA	NA	NA	NA	NA	NA	NA	NA	NA	NA	NA
NA	NCI_LPA4_mediated_signaling_events_Main_Pathway	NA	NA	NA	NA	NA	NA	NA	NA	NA	NA	NA	NA	NA
NA	NCI_LPA4_mediated_signaling_events_Pathway_(cAMP_biosynthetic_process)	NA	NA	NA	NA	NA	NA	NA	NA	NA	NA	NA	NA	NA
NA	NCI_mTOR_signaling_Pathway_(translational_initiation)	NA	NA	NA	NA	NA	NA	NA	NA	NA	NA	NA	NA	NA
NA	NCI_N_cadherin_signaling_events_Pathway_(axonogenesis)	NA	NA	NA	NA	NA	NA	NA	NA	NA	NA	NA	NA	NA
NA	NCI_Nectin_adhesion_Pathway_(positive_regulation_of_lamellipodium_assembly)	NA	NA	NA	NA	NA	NA	NA	NA	NA	NA	NA	NA	NA
NA	NCI_Nephrin_Neph1_signaling_in_the_kidney_podocyte_Pathway_(apoptosis)	NA	NA	NA	NA	NA	NA	NA	NA	NA	NA	NA	NA	NA
NA	NCI_Noncanonical_Wnt_signaling_Main_Pathway	NA	NA	NA	NA	NA	NA	NA	NA	NA	NA	NA	NA	NA
NA	NCI_Nongenotropic_Androgen_signaling_Main_Pathway	NA	NA	NA	NA	NA	NA	NA	NA	NA	NA	NA	NA	NA
NA	NCI_Nongenotropic_Androgen_signaling_Pathway_(apoptosis)	NA	NA	NA	NA	NA	NA	NA	NA	NA	NA	NA	NA	NA
NA	NCI_Notch_mediated_HES_HEY_network_Main_Pathway	NA	NA	NA	NA	NA	NA	NA	NA	NA	NA	NA	NA	NA
NA	NCI_p38_MAPK_signaling_Main_Pathway	NA	NA	NA	NA	NA	NA	NA	NA	NA	NA	NA	NA	NA
NA	NCI_p75_NTR_mediated_signaling_Pathway_(neuron_apoptosis)	NA	NA	NA	NA	NA	NA	NA	NA	NA	NA	NA	NA	NA
NA	NCI_PAR4_mediated_thrombin_signaling_events_Main_Pathway	NA	NA	NA	NA	NA	NA	NA	NA	NA	NA	NA	NA	NA
NA	NCI_PDGF_receptor_signaling_network_Main_Pathway	NA	NA	NA	NA	NA	NA	NA	NA	NA	NA	NA	NA	NA
NA	NCI_PDGF_receptor_signaling_network_Pathway_(platelet_derived_growth_factor_receptor_signaling_pathway)	NA	NA	NA	NA	NA	NA	NA	NA	NA	NA	NA	NA	NA
NA	NCI_PDGFR_alpha_signaling_Main_Pathway	NA	NA	NA	NA	NA	NA	NA	NA	NA	NA	NA	NA	NA
NA	NCI_PDGFR_alpha_signaling_Pathway_(JAK_STAT_cascade)	NA	NA	NA	NA	NA	NA	NA	NA	NA	NA	NA	NA	NA
NA	NCI_PDGFR_alpha_signaling_Pathway_(positive_regulation_of_JUN_kinase_activity)	NA	NA	NA	NA	NA	NA	NA	NA	NA	NA	NA	NA	NA
NA	NCI_PDGFR_alpha_signaling_Pathway_(Ras_protein_signal_transduction)	NA	NA	NA	NA	NA	NA	NA	NA	NA	NA	NA	NA	NA
NA	NCI_PDGFR_beta_signaling_Pathway_(actin_cytoskeleton_organization)	NA	NA	NA	NA	NA	NA	NA	NA	NA	NA	NA	NA	NA
NA	NCI_PDGFR_beta_signaling_Pathway_(receptor_recycling)	NA	NA	NA	NA	NA	NA	NA	NA	NA	NA	NA	NA	NA
NA	NCI_PLK1_signaling_events_Main_Pathway	NA	NA	NA	NA	NA	NA	NA	NA	NA	NA	NA	NA	NA
NA	NCI_PLK1_signaling_events_Pathway_(chromosome_segregation)	NA	NA	NA	NA	NA	NA	NA	NA	NA	NA	NA	NA	NA
NA	NCI_PLK1_signaling_events_Pathway_(cytokinesis)	NA	NA	NA	NA	NA	NA	NA	NA	NA	NA	NA	NA	NA
NA	NCI_PLK1_signaling_events_Pathway_(G2_M_transition_of_mitotic_cell_cycle)	NA	NA	NA	NA	NA	NA	NA	NA	NA	NA	NA	NA	NA
NA	NCI_PLK1_signaling_events_Pathway_(Golgi_organization)	NA	NA	NA	NA	NA	NA	NA	NA	NA	NA	NA	NA	NA
NA	NCI_PLK1_signaling_events_Pathway_(metaphase_plate_congression)	NA	NA	NA	NA	NA	NA	NA	NA	NA	NA	NA	NA	NA
NA	NCI_PLK1_signaling_events_Pathway_(microtubule_cytoskeleton_organization)	NA	NA	NA	NA	NA	NA	NA	NA	NA	NA	NA	NA	NA
NA	NCI_PLK1_signaling_events_Pathway_(positive_regulation_of_microtubule_depolymerization)	NA	NA	NA	NA	NA	NA	NA	NA	NA	NA	NA	NA	NA
NA	NCI_PLK1_signaling_events_Pathway_(proteasomal_ubiquitin_dependent_protein_catabolic_process)	NA	NA	NA	NA	NA	NA	NA	NA	NA	NA	NA	NA	NA
NA	NCI_PLK1_signaling_events_Pathway_(regulation_of_attachment_of_spindle_microtubules_to_kinetochore)	NA	NA	NA	NA	NA	NA	NA	NA	NA	NA	NA	NA	NA
NA	NCI_PLK1_signaling_events_Pathway_(regulation_of_centriole_centriole_cohesion)	NA	NA	NA	NA	NA	NA	NA	NA	NA	NA	NA	NA	NA
NA	NCI_PLK1_signaling_events_Pathway_(regulation_of_mitotic_centrosome_separation)	NA	NA	NA	NA	NA	NA	NA	NA	NA	NA	NA	NA	NA
NA	NCI_PLK1_signaling_events_Pathway_(spindle_assembly)	NA	NA	NA	NA	NA	NA	NA	NA	NA	NA	NA	NA	NA
NA	NCI_PLK1_signaling_events_Pathway_(spindle_elongation)	NA	NA	NA	NA	NA	NA	NA	NA	NA	NA	NA	NA	NA
NA	NCI_PLK1_signaling_events_Pathway_(spindle_stabilization)	NA	NA	NA	NA	NA	NA	NA	NA	NA	NA	NA	NA	NA
NA	NCI_PLK2_and_PLK4_events_Main_Pathway	NA	NA	NA	NA	NA	NA	NA	NA	NA	NA	NA	NA	NA
NA	NCI_PLK2_and_PLK4_events_Pathway_(regulation_of_centriole_replication)	NA	NA	NA	NA	NA	NA	NA	NA	NA	NA	NA	NA	NA
NA	NCI_Proteoglycan_syndecan_mediated_signaling_events_Main_Pathway	NA	NA	NA	NA	NA	NA	NA	NA	NA	NA	NA	NA	NA
NA	NCI_RAC1_signaling_Pathway_(neuron_projection_development)	NA	NA	NA	NA	NA	NA	NA	NA	NA	NA	NA	NA	NA
NA	NCI_RAC1_signaling_Pathway_(regulation_of_cell_cycle)	NA	NA	NA	NA	NA	NA	NA	NA	NA	NA	NA	NA	NA
NA	NCI_Reelin_signaling_Main_Pathway	NA	NA	NA	NA	NA	NA	NA	NA	NA	NA	NA	NA	NA
NA	NCI_Reelin_signaling_Pathway_(long_term_memory)	NA	NA	NA	NA	NA	NA	NA	NA	NA	NA	NA	NA	NA
NA	NCI_Reelin_signaling_Pathway_(neuron_migration)	NA	NA	NA	NA	NA	NA	NA	NA	NA	NA	NA	NA	NA
NA	NCI_Regulation_of_Androgen_receptor_activity_Pathway_(Pathway_positive_regulation_of_transcription_via_GATA2)	NA	NA	NA	NA	NA	NA	NA	NA	NA	NA	NA	NA	NA
NA	NCI_Regulation_of_cytoplasmic_and_nuclear_SMAD2_3_signaling_Main_Pathway	NA	NA	NA	NA	NA	NA	NA	NA	NA	NA	NA	NA	NA
NA	NCI_Regulation_of_nuclear_SMAD2_3_signaling_Main_Pathway	NA	NA	NA	NA	NA	NA	NA	NA	NA	NA	NA	NA	NA
NA	NCI_Regulation_of_nuclear_SMAD2_3_signaling_Pathway_(muscle_cell_differentiation)	NA	NA	NA	NA	NA	NA	NA	NA	NA	NA	NA	NA	NA
NA	NCI_Regulation_of_nuclear_SMAD2_3_signaling_Pathway_(negative_regulation_of_cell_growth)	NA	NA	NA	NA	NA	NA	NA	NA	NA	NA	NA	NA	NA
NA	NCI_Regulation_of_nuclear_SMAD2_3_signaling_Pathway_(Pathway_degradation_of_SMAD3)	NA	NA	NA	NA	NA	NA	NA	NA	NA	NA	NA	NA	NA
NA	NCI_Regulation_of_retinoblastoma_protein_Main_Pathway	NA	NA	NA	NA	NA	NA	NA	NA	NA	NA	NA	NA	NA
NA	NCI_Regulation_of_retinoblastoma_protein_Pathway_(erythrocyte_differentiation)	NA	NA	NA	NA	NA	NA	NA	NA	NA	NA	NA	NA	NA
NA	NCI_Regulation_of_retinoblastoma_protein_Pathway_(histone_methylation)	NA	NA	NA	NA	NA	NA	NA	NA	NA	NA	NA	NA	NA
NA	NCI_Regulation_of_retinoblastoma_protein_Pathway_(Pathway_rRNA_transcription_via_RB1)	NA	NA	NA	NA	NA	NA	NA	NA	NA	NA	NA	NA	NA
NA	NCI_Regulation_of_retinoblastoma_protein_Pathway_(proteasomal_ubiquitin_dependent_protein_catabolic_process)	NA	NA	NA	NA	NA	NA	NA	NA	NA	NA	NA	NA	NA
NA	NCI_Regulation_of_Telomerase_Main_Pathway	NA	NA	NA	NA	NA	NA	NA	NA	NA	NA	NA	NA	NA
NA	NCI_Retinoic_acid_receptors_mediated_signaling_Main_Pathway	NA	NA	NA	NA	NA	NA	NA	NA	NA	NA	NA	NA	NA
NA	NCI_Retinoic_acid_receptors_mediated_signaling_Pathway_(proteasomal_ubiquitin_dependent_protein_catabolic_process)	NA	NA	NA	NA	NA	NA	NA	NA	NA	NA	NA	NA	NA
NA	NCI_RhoA_signaling_Pathway_(Golgi_organization)	NA	NA	NA	NA	NA	NA	NA	NA	NA	NA	NA	NA	NA
NA	NCI_Role_of_Calcineurin_dependent_NFAT_signaling_in_lymphocytes_Main_Pathway	NA	NA	NA	NA	NA	NA	NA	NA	NA	NA	NA	NA	NA
NA	NCI_RXR_and_RAR_heterodimerization_with_other_nuclear_receptor_Main_Pathway	NA	NA	NA	NA	NA	NA	NA	NA	NA	NA	NA	NA	NA
NA	NCI_Signaling_events_mediated_by_HDAC_Class_I_Main_Pathway	NA	NA	NA	NA	NA	NA	NA	NA	NA	NA	NA	NA	NA
NA	NCI_Signaling_events_mediated_by_HDAC_Class_I_Pathway_(histone_deacetylation)	NA	NA	NA	NA	NA	NA	NA	NA	NA	NA	NA	NA	NA
NA	NCI_Signaling_events_mediated_by_Hepatocyte_Growth_Factor_Receptor_c_Met__Main_Pathway	NA	NA	NA	NA	NA	NA	NA	NA	NA	NA	NA	NA	NA
NA	NCI_Signaling_events_mediated_by_Hepatocyte_Growth_Factor_Receptor_c_Met__Pathway_(apoptosis)	NA	NA	NA	NA	NA	NA	NA	NA	NA	NA	NA	NA	NA
NA	NCI_Signaling_events_mediated_by_Hepatocyte_Growth_Factor_Receptor_c_Met__Pathway_(Pathway_positive_regulation_of_NF_kappaB_transcription_factor_activity_via_RAF1)	NA	NA	NA	NA	NA	NA	NA	NA	NA	NA	NA	NA	NA
NA	NCI_Signaling_events_mediated_by_Hepatocyte_Growth_Factor_Receptor_c_Met__Pathway_(positive_regulation_of_tyrosine_phosphorylation_of_STAT_protein)	NA	NA	NA	NA	NA	NA	NA	NA	NA	NA	NA	NA	NA
NA	NCI_Signaling_events_mediated_by_Hepatocyte_Growth_Factor_Receptor_c_Met__Pathway_(translational_initiation)	NA	NA	NA	NA	NA	NA	NA	NA	NA	NA	NA	NA	NA
NA	NCI_Signaling_events_mediated_by_PRL_Main_Pathway	NA	NA	NA	NA	NA	NA	NA	NA	NA	NA	NA	NA	NA
NA	NCI_Signaling_events_mediated_by_TCPTP_Main_Pathway	NA	NA	NA	NA	NA	NA	NA	NA	NA	NA	NA	NA	NA
NA	NCI_Signaling_events_mediated_by_TCPTP_Pathway_(G1_S_transition_of_mitotic_cell_cycle)	NA	NA	NA	NA	NA	NA	NA	NA	NA	NA	NA	NA	NA
NA	NCI_Signaling_events_mediated_by_TCPTP_Pathway_(macrophage_differentiation)	NA	NA	NA	NA	NA	NA	NA	NA	NA	NA	NA	NA	NA
NA	NCI_Signaling_events_mediated_by_TCPTP_Pathway_(MAPKKK_cascade)	NA	NA	NA	NA	NA	NA	NA	NA	NA	NA	NA	NA	NA
NA	NCI_Signaling_events_mediated_by_TCPTP_Pathway_(positive_regulation_of_S_phase_of_mitotic_cell_cycle)	NA	NA	NA	NA	NA	NA	NA	NA	NA	NA	NA	NA	NA
NA	NCI_Signaling_events_mediated_by_TCPTP_Pathway_(regulation_of_gluconeogenesis)	NA	NA	NA	NA	NA	NA	NA	NA	NA	NA	NA	NA	NA
NA	NCI_Signaling_events_mediated_by_the_Hedgehog_family_Main_Pathway	NA	NA	NA	NA	NA	NA	NA	NA	NA	NA	NA	NA	NA
NA	NCI_Signaling_events_mediated_by_the_Hedgehog_family_Pathway_(catabolic_process)	NA	NA	NA	NA	NA	NA	NA	NA	NA	NA	NA	NA	NA
NA	NCI_Signaling_events_mediated_by_the_Hedgehog_family_Pathway_(determination_of_left_right_symmetry)	NA	NA	NA	NA	NA	NA	NA	NA	NA	NA	NA	NA	NA
NA	NCI_Signaling_events_mediated_by_the_Hedgehog_family_Pathway_(heart_development)	NA	NA	NA	NA	NA	NA	NA	NA	NA	NA	NA	NA	NA
NA	NCI_Signaling_events_mediated_by_the_Hedgehog_family_Pathway_(heart_looping)	NA	NA	NA	NA	NA	NA	NA	NA	NA	NA	NA	NA	NA
NA	NCI_Signaling_events_mediated_by_the_Hedgehog_family_Pathway_(pancreas_development)	NA	NA	NA	NA	NA	NA	NA	NA	NA	NA	NA	NA	NA
NA	NCI_Signaling_events_mediated_by_the_Hedgehog_family_Pathway_(somite_specification)	NA	NA	NA	NA	NA	NA	NA	NA	NA	NA	NA	NA	NA
NA	NCI_Signaling_events_mediated_by_VEGFR1_and_VEGFR2_Pathway_(Pathway_degradation_of_AKAP1)	NA	NA	NA	NA	NA	NA	NA	NA	NA	NA	NA	NA	NA
NA	NCI_Signaling_mediated_by_p38_gamma_and_p38_delta_Main_Pathway	NA	NA	NA	NA	NA	NA	NA	NA	NA	NA	NA	NA	NA
NA	NCI_Signaling_mediated_by_p38_gamma_and_p38_delta_Pathway_(G2_M_transition_checkpoint)	NA	NA	NA	NA	NA	NA	NA	NA	NA	NA	NA	NA	NA
NA	NCI_Sumoylation_by_RanBP2_regulates_transcriptional_repression_Main_Pathway	NA	NA	NA	NA	NA	NA	NA	NA	NA	NA	NA	NA	NA
NA	NCI_Syndecan_3_mediated_signaling_events_Main_Pathway	NA	NA	NA	NA	NA	NA	NA	NA	NA	NA	NA	NA	NA
NA	NCI_Syndecan_4_mediated_signaling_events_Main_Pathway	NA	NA	NA	NA	NA	NA	NA	NA	NA	NA	NA	NA	NA
NA	NCI_Thromboxane_A2_receptor_signaling_Main_Pathway	NA	NA	NA	NA	NA	NA	NA	NA	NA	NA	NA	NA	NA
NA	NCI_Thromboxane_A2_receptor_signaling_Pathway_(cAMP_biosynthetic_process)	NA	NA	NA	NA	NA	NA	NA	NA	NA	NA	NA	NA	NA
NA	NCI_Thromboxane_A2_receptor_signaling_Pathway_(JNK_cascade)	NA	NA	NA	NA	NA	NA	NA	NA	NA	NA	NA	NA	NA
NA	NCI_Thromboxane_A2_receptor_signaling_Pathway_(platelet_activation)	NA	NA	NA	NA	NA	NA	NA	NA	NA	NA	NA	NA	NA
NA	NCI_TRAIL_signaling_Main_Pathway	NA	NA	NA	NA	NA	NA	NA	NA	NA	NA	NA	NA	NA
NA	NCI_Trk_receptor_signaling_mediated_by_PI3K_and_PLC_gamma_Pathway_(regulation_of_long_term_neuronal_synaptic_plasticity)	NA	NA	NA	NA	NA	NA	NA	NA	NA	NA	NA	NA	NA
NA	NCI_Trk_receptor_signaling_mediated_by_the_MAPK_Main_Pathway	NA	NA	NA	NA	NA	NA	NA	NA	NA	NA	NA	NA	NA
NA	NCI_Trk_receptor_signaling_mediated_by_the_MAPK_Pathway_(neuron_apoptosis)	NA	NA	NA	NA	NA	NA	NA	NA	NA	NA	NA	NA	NA
NA	NCI_Validated_nuclear_estrogen_receptor_beta_network_Main_Pathway	NA	NA	NA	NA	NA	NA	NA	NA	NA	NA	NA	NA	NA
NA	NCI_Validated_targets_of_C_MYC_transcriptional_activation_Main_Pathway	NA	NA	NA	NA	NA	NA	NA	NA	NA	NA	NA	NA	NA
NA	NCI_Validated_targets_of_C_MYC_transcriptional_activation_Pathway_(Pathway_rRNA_transcription_via_MAX)	NA	NA	NA	NA	NA	NA	NA	NA	NA	NA	NA	NA	NA
NA	NCI_Validated_targets_of_C_MYC_transcriptional_repression_Main_Pathway	NA	NA	NA	NA	NA	NA	NA	NA	NA	NA	NA	NA	NA
NA	NCI_Validated_targets_of_C_MYC_transcriptional_repression_Pathway_(cell_cycle_arrest)	NA	NA	NA	NA	NA	NA	NA	NA	NA	NA	NA	NA	NA
NA	NCI_Validated_transcriptional_targets_of_AP1_family_members_Fra1_and_Fra2_Main_Pathway	NA	NA	NA	NA	NA	NA	NA	NA	NA	NA	NA	NA	NA
NA	NGF_Pathway_Neuronal_Survival	NA	NA	NA	NA	NA	NA	NA	NA	NA	NA	NA	NA	NA
NA	p53_Signaling_Pathway	NA	NA	NA	NA	NA	NA	NA	NA	NA	NA	NA	NA	NA
NA	p53_Signaling_Pathway_Apoptosis	NA	NA	NA	NA	NA	NA	NA	NA	NA	NA	NA	NA	NA
NA	p53_Signaling_Pathway_Breast_Cancer	NA	NA	NA	NA	NA	NA	NA	NA	NA	NA	NA	NA	NA
NA	p53_Signaling_Pathway_Cancer	NA	NA	NA	NA	NA	NA	NA	NA	NA	NA	NA	NA	NA
NA	p53_Signaling_Pathway_Cell_Cycle_Arrest	NA	NA	NA	NA	NA	NA	NA	NA	NA	NA	NA	NA	NA
NA	p53_Signaling_Pathway_Cell_Growth_Accumulation	NA	NA	NA	NA	NA	NA	NA	NA	NA	NA	NA	NA	NA
NA	p53_Signaling_Pathway_DNA_Repair	NA	NA	NA	NA	NA	NA	NA	NA	NA	NA	NA	NA	NA
NA	p53_Signaling_Pathway_Exosome_Mediated_Secretion	NA	NA	NA	NA	NA	NA	NA	NA	NA	NA	NA	NA	NA
NA	p53_Signaling_Pathway_Gene_Expression_Anti-Apoptosis_via_TP53	NA	NA	NA	NA	NA	NA	NA	NA	NA	NA	NA	NA	NA
NA	p53_Signaling_Pathway_Gene_Expression_Cell_Cycle_and_Cell_Growth_via_TP53	NA	NA	NA	NA	NA	NA	NA	NA	NA	NA	NA	NA	NA
NA	p53_Signaling_Pathway_Gene_Expression_Cell_Fate_and_Development_via_TP53	NA	NA	NA	NA	NA	NA	NA	NA	NA	NA	NA	NA	NA
NA	p53_Signaling_Pathway_Gene_Expression_Cell_Signaling_via_TP53	NA	NA	NA	NA	NA	NA	NA	NA	NA	NA	NA	NA	NA
NA	p53_Signaling_Pathway_Gene_Expression_DNA_Replication_and_Repair_via_TP53	NA	NA	NA	NA	NA	NA	NA	NA	NA	NA	NA	NA	NA
NA	p53_Signaling_Pathway_Gene_Expression_ECM_and_Adhesion_via_TP53	NA	NA	NA	NA	NA	NA	NA	NA	NA	NA	NA	NA	NA
NA	p53_Signaling_Pathway_Gene_Expression_Infection_and_Immune_Response_via_TP53	NA	NA	NA	NA	NA	NA	NA	NA	NA	NA	NA	NA	NA
NA	p53_Signaling_Pathway_Inhibition_of_Angiogenesis_and_Metastasis	NA	NA	NA	NA	NA	NA	NA	NA	NA	NA	NA	NA	NA
NA	p53_Signaling_Pathway_Normal_Cell_Cycle_Progression	NA	NA	NA	NA	NA	NA	NA	NA	NA	NA	NA	NA	NA
NA	PPAR_Pathway	NA	NA	NA	NA	NA	NA	NA	NA	NA	NA	NA	NA	NA
NA	PPAR_Pathway_Adipocyte_Differentiation_Glucose_Homeostasis_and_Macrophage_Function	NA	NA	NA	NA	NA	NA	NA	NA	NA	NA	NA	NA	NA
NA	PPAR_Pathway_Fatty_Acid_Metabolism_Lipid_Homeostasis_and_Skin_Proliferation	NA	NA	NA	NA	NA	NA	NA	NA	NA	NA	NA	NA	NA
NA	PPAR_Pathway_Peroxisome_Proliferation_Hepatocarcinogenesis_Fatty_Acid_Metbolism_and_Lipid_Homeostasis	NA	NA	NA	NA	NA	NA	NA	NA	NA	NA	NA	NA	NA
NA	PTEN_Pathway_Cell_Cycle	NA	NA	NA	NA	NA	NA	NA	NA	NA	NA	NA	NA	NA
NA	PTEN_Pathway_Differentiation	NA	NA	NA	NA	NA	NA	NA	NA	NA	NA	NA	NA	NA
NA	PTEN_Pathway_DNA_Repair	NA	NA	NA	NA	NA	NA	NA	NA	NA	NA	NA	NA	NA
NA	PTEN_Pathway_Genomic_Stability	NA	NA	NA	NA	NA	NA	NA	NA	NA	NA	NA	NA	NA
NA	PTEN_Pathway_Growth	NA	NA	NA	NA	NA	NA	NA	NA	NA	NA	NA	NA	NA
NA	RANK_Signaling_in_Osteoclasts_Pathway_Inhibition_of_Death	NA	NA	NA	NA	NA	NA	NA	NA	NA	NA	NA	NA	NA
NA	Ras_Pathway_Gene_Expression_Cell_Proliferation_Cell_Survival_Differentiation_Development_Cell_Cycle_Control_Cell_Motility_Tumorigenesis_via_ELK4_ATF2_MEF2D_STAT2_CREB3_CCNA1_MYC_ELK1_JUN_CDK4	NA	NA	NA	NA	NA	NA	NA	NA	NA	NA	NA	NA	NA
NA	Ras_Pathway_Receptor_Endocytosis	NA	NA	NA	NA	NA	NA	NA	NA	NA	NA	NA	NA	NA
NA	reactome_2_LTR_circle_formation_Main_Pathway	NA	NA	NA	NA	NA	NA	NA	NA	NA	NA	NA	NA	NA
NA	reactome_A_tetrasaccharide_linker_sequence_is_required_for_GAG_synthesis_Main_Pathway	NA	NA	NA	NA	NA	NA	NA	NA	NA	NA	NA	NA	NA
NA	reactome_ABC_family_proteins_mediated_transport_Main_Pathway	NA	NA	NA	NA	NA	NA	NA	NA	NA	NA	NA	NA	NA
NA	reactome_Abnormal_metabolism_in_phenylketonuria_Main_Pathway	NA	NA	NA	NA	NA	NA	NA	NA	NA	NA	NA	NA	NA
NA	reactome_Abortive_elongation_of_HIV_1_transcript_in_the_absence_of_Tat_Main_Pathway	NA	NA	NA	NA	NA	NA	NA	NA	NA	NA	NA	NA	NA
NA	reactome_Acetylcholine_regulates_insulin_secretion_Main_Pathway	NA	NA	NA	NA	NA	NA	NA	NA	NA	NA	NA	NA	NA
NA	reactome_activated_TAK1_mediates_p38_MAPK_activation_Main_Pathway	NA	NA	NA	NA	NA	NA	NA	NA	NA	NA	NA	NA	NA
NA	reactome_Activation_of_ATR_in_response_to_replication_stress_Main_Pathway	NA	NA	NA	NA	NA	NA	NA	NA	NA	NA	NA	NA	NA
NA	reactome_Activation_of_BIM_and_translocation_to_mitochondria_Main_Pathway	NA	NA	NA	NA	NA	NA	NA	NA	NA	NA	NA	NA	NA
NA	reactome_Activation_of_DNA_fragmentation_factor_Main_Pathway	NA	NA	NA	NA	NA	NA	NA	NA	NA	NA	NA	NA	NA
NA	reactome_Activation_of_gene_expression_by_SREBF_SREBP__Main_Pathway	NA	NA	NA	NA	NA	NA	NA	NA	NA	NA	NA	NA	NA
NA	reactome_Activation_of_NIMA_Kinases_NEK9_NEK6_NEK7_Main_Pathway	NA	NA	NA	NA	NA	NA	NA	NA	NA	NA	NA	NA	NA
NA	reactome_Activation_of_NOXA_and_translocation_to_mitochondria_Main_Pathway	NA	NA	NA	NA	NA	NA	NA	NA	NA	NA	NA	NA	NA
NA	reactome_Activation_of_PUMA_and_translocation_to_mitochondria_Main_Pathway	NA	NA	NA	NA	NA	NA	NA	NA	NA	NA	NA	NA	NA
NA	reactome_Activation_of_Rac_Main_Pathway	NA	NA	NA	NA	NA	NA	NA	NA	NA	NA	NA	NA	NA
NA	reactome_Activation_of_the_pre_replicative_complex_Main_Pathway	NA	NA	NA	NA	NA	NA	NA	NA	NA	NA	NA	NA	NA
NA	reactome_Acyl_chain_remodelling_of_PE_Main_Pathway	NA	NA	NA	NA	NA	NA	NA	NA	NA	NA	NA	NA	NA
NA	reactome_Acyl_chain_remodelling_of_PS_Main_Pathway	NA	NA	NA	NA	NA	NA	NA	NA	NA	NA	NA	NA	NA
NA	reactome_Adenylate_cyclase_activating_Main_Pathway	NA	NA	NA	NA	NA	NA	NA	NA	NA	NA	NA	NA	NA
NA	reactome_Advanced_glycosylation_endproduct_receptor_signaling_Main_Pathway	NA	NA	NA	NA	NA	NA	NA	NA	NA	NA	NA	NA	NA
NA	reactome_AKT_phosphorylates_targets_in_the_cytosol_Main_Pathway	NA	NA	NA	NA	NA	NA	NA	NA	NA	NA	NA	NA	NA
NA	reactome_AKT_phosphorylates_targets_in_the_nucleus_Main_Pathway	NA	NA	NA	NA	NA	NA	NA	NA	NA	NA	NA	NA	NA
NA	reactome_alpha_linolenic_acid_ALA_metabolism_Main_Pathway	NA	NA	NA	NA	NA	NA	NA	NA	NA	NA	NA	NA	NA
NA	reactome_Amino_acid_synthesis_and_interconversion_transamination__Main_Pathway	NA	NA	NA	NA	NA	NA	NA	NA	NA	NA	NA	NA	NA
NA	reactome_Amyloids_Main_Pathway	NA	NA	NA	NA	NA	NA	NA	NA	NA	NA	NA	NA	NA
NA	reactome_APC_C_Cdc20_mediated_degradation_of_Cyclin_B_Main_Pathway	NA	NA	NA	NA	NA	NA	NA	NA	NA	NA	NA	NA	NA
NA	reactome_APC_C_Cdc20_mediated_degradation_of_mitotic_proteins_Main_Pathway	NA	NA	NA	NA	NA	NA	NA	NA	NA	NA	NA	NA	NA
NA	reactome_APC_C_Cdh1_mediated_degradation_of_Cdc20_and_other_APC_C_Cdh1_targeted_proteins_in_late_mitosis_early_G1_Main_Pathway	NA	NA	NA	NA	NA	NA	NA	NA	NA	NA	NA	NA	NA
NA	reactome_APC_Cdc20_mediated_degradation_of_Nek2A_Main_Pathway	NA	NA	NA	NA	NA	NA	NA	NA	NA	NA	NA	NA	NA
NA	reactome_APOBEC3G_mediated_resistance_to_HIV_1_infection_Main_Pathway	NA	NA	NA	NA	NA	NA	NA	NA	NA	NA	NA	NA	NA
NA	reactome_Apoptotic_cleavage_of_cellular_proteins_Main_Pathway	NA	NA	NA	NA	NA	NA	NA	NA	NA	NA	NA	NA	NA
NA	reactome_Assembly_of_the_ORC_complex_at_the_origin_of_replication_Main_Pathway	NA	NA	NA	NA	NA	NA	NA	NA	NA	NA	NA	NA	NA
NA	reactome_Assembly_of_the_RAD50_MRE11_NBS1_complex_at_DNA_double_strand_breaks_Main_Pathway	NA	NA	NA	NA	NA	NA	NA	NA	NA	NA	NA	NA	NA
NA	reactome_Assembly_of_the_RAD51_ssDNA_nucleoprotein_complex_Main_Pathway	NA	NA	NA	NA	NA	NA	NA	NA	NA	NA	NA	NA	NA
NA	reactome_Association_of_TriC_CCT_with_target_proteins_during_biosynthesis_Main_Pathway	NA	NA	NA	NA	NA	NA	NA	NA	NA	NA	NA	NA	NA
NA	reactome_Astrocytic_Glutamate_Glutamine_Uptake_And_Metabolism_Main_Pathway	NA	NA	NA	NA	NA	NA	NA	NA	NA	NA	NA	NA	NA
NA	reactome_ATM_mediated_phosphorylation_of_repair_proteins_Main_Pathway	NA	NA	NA	NA	NA	NA	NA	NA	NA	NA	NA	NA	NA
NA	reactome_ATP_sensitive_Potassium_channels_Main_Pathway	NA	NA	NA	NA	NA	NA	NA	NA	NA	NA	NA	NA	NA
NA	reactome_Attenuation_phase_Main_Pathway	NA	NA	NA	NA	NA	NA	NA	NA	NA	NA	NA	NA	NA
NA	reactome_Autointegration_results_in_viral_DNA_circles_Main_Pathway	NA	NA	NA	NA	NA	NA	NA	NA	NA	NA	NA	NA	NA
NA	reactome_Beta_oxidation_of_butanoyl_CoA_to_acetyl_CoA_Main_Pathway	NA	NA	NA	NA	NA	NA	NA	NA	NA	NA	NA	NA	NA
NA	reactome_Beta_oxidation_of_decanoyl_CoA_to_octanoyl_CoA_CoA_Main_Pathway	NA	NA	NA	NA	NA	NA	NA	NA	NA	NA	NA	NA	NA
NA	reactome_Beta_oxidation_of_hexanoyl_CoA_to_butanoyl_CoA_Main_Pathway	NA	NA	NA	NA	NA	NA	NA	NA	NA	NA	NA	NA	NA
NA	reactome_Beta_oxidation_of_octanoyl_CoA_to_hexanoyl_CoA_Main_Pathway	NA	NA	NA	NA	NA	NA	NA	NA	NA	NA	NA	NA	NA
NA	reactome_Beta_oxidation_of_pristanoyl_CoA_Main_Pathway	NA	NA	NA	NA	NA	NA	NA	NA	NA	NA	NA	NA	NA
NA	reactome_BH3_only_proteins_associate_with_and_inactivate_anti_apoptotic_BCL_2_members_Main_Pathway	NA	NA	NA	NA	NA	NA	NA	NA	NA	NA	NA	NA	NA
NA	reactome_Bicarbonate_transporters_Main_Pathway	NA	NA	NA	NA	NA	NA	NA	NA	NA	NA	NA	NA	NA
NA	reactome_Biosynthesis_of_the_N_glycan_precursor_dolichol_lipid_linked_oligosaccharide_LLO_and_transfer_to_a_nascent_protein_Main_Pathway	NA	NA	NA	NA	NA	NA	NA	NA	NA	NA	NA	NA	NA
NA	reactome_Biotin_transport_and_metabolism_Main_Pathway	NA	NA	NA	NA	NA	NA	NA	NA	NA	NA	NA	NA	NA
NA	reactome_Butyrate_Response_Factor_1_BRF1_destabilizes_mRNA_Main_Pathway	NA	NA	NA	NA	NA	NA	NA	NA	NA	NA	NA	NA	NA
NA	reactome_Calmodulin_induced_events_Main_Pathway	NA	NA	NA	NA	NA	NA	NA	NA	NA	NA	NA	NA	NA
NA	reactome_CaMK_IV_mediated_phosphorylation_of_CREB_Main_Pathway	NA	NA	NA	NA	NA	NA	NA	NA	NA	NA	NA	NA	NA
NA	reactome_Carnitine_synthesis_Main_Pathway	NA	NA	NA	NA	NA	NA	NA	NA	NA	NA	NA	NA	NA
NA	reactome_Cdc20_Phospho_APC_C_mediated_degradation_of_Cyclin_A_Main_Pathway	NA	NA	NA	NA	NA	NA	NA	NA	NA	NA	NA	NA	NA
NA	reactome_CDC6_association_with_the_ORC_origin_complex_Main_Pathway	NA	NA	NA	NA	NA	NA	NA	NA	NA	NA	NA	NA	NA
NA	reactome_CDT1_association_with_the_CDC6_ORC_origin_complex_Main_Pathway	NA	NA	NA	NA	NA	NA	NA	NA	NA	NA	NA	NA	NA
NA	reactome_cell_division_Main_Pathway	NA	NA	NA	NA	NA	NA	NA	NA	NA	NA	NA	NA	NA
NA	reactome_Chk1_Chk2_Cds1_mediated_inactivation_of_Cyclin_B_Cdk1_complex_Main_Pathway	NA	NA	NA	NA	NA	NA	NA	NA	NA	NA	NA	NA	NA
NA	reactome_CHL1_interactions_Main_Pathway	NA	NA	NA	NA	NA	NA	NA	NA	NA	NA	NA	NA	NA
NA	reactome_Cholesterol_biosynthesis_Main_Pathway	NA	NA	NA	NA	NA	NA	NA	NA	NA	NA	NA	NA	NA
NA	reactome_Chylomicron_mediated_lipid_transport_Main_Pathway	NA	NA	NA	NA	NA	NA	NA	NA	NA	NA	NA	NA	NA
NA	reactome_Clearance_of_Nuclear_Envelope_Membranes_from_Chromatin_Main_Pathway	NA	NA	NA	NA	NA	NA	NA	NA	NA	NA	NA	NA	NA
NA	reactome_Cleavage_of_Growing_Transcript_in_the_Termination_Region_Main_Pathway	NA	NA	NA	NA	NA	NA	NA	NA	NA	NA	NA	NA	NA
NA	reactome_Cleavage_of_the_damaged_purine_Main_Pathway	NA	NA	NA	NA	NA	NA	NA	NA	NA	NA	NA	NA	NA
NA	reactome_Cobalamin_Cbl_vitamin_B12_transport_and_metabolism_Main_Pathway	NA	NA	NA	NA	NA	NA	NA	NA	NA	NA	NA	NA	NA
NA	reactome_Cohesin_Loading_onto_Chromatin_Main_Pathway	NA	NA	NA	NA	NA	NA	NA	NA	NA	NA	NA	NA	NA
NA	reactome_Condensation_of_Prometaphase_Chromosomes_Main_Pathway	NA	NA	NA	NA	NA	NA	NA	NA	NA	NA	NA	NA	NA
NA	reactome_Condensation_of_Prophase_Chromosomes_Main_Pathway	NA	NA	NA	NA	NA	NA	NA	NA	NA	NA	NA	NA	NA
NA	reactome_Constitutive_Signaling_by_NOTCH1_HD_PEST_Domain_Mutants_Main_Pathway	NA	NA	NA	NA	NA	NA	NA	NA	NA	NA	NA	NA	NA
NA	reactome_Constitutive_Signaling_by_NOTCH1_PEST_Domain_Mutants_Main_Pathway	NA	NA	NA	NA	NA	NA	NA	NA	NA	NA	NA	NA	NA
NA	reactome_Conversion_from_APC_C_Cdc20_to_APC_C_Cdh1_in_late_anaphase_Main_Pathway	NA	NA	NA	NA	NA	NA	NA	NA	NA	NA	NA	NA	NA
NA	reactome_CREB_phosphorylation_Main_Pathway	NA	NA	NA	NA	NA	NA	NA	NA	NA	NA	NA	NA	NA
NA	reactome_CREB_phosphorylation_through_the_activation_of_Adenylate_Cyclase_Main_Pathway	NA	NA	NA	NA	NA	NA	NA	NA	NA	NA	NA	NA	NA
NA	reactome_CREB_phosphorylation_through_the_activation_of_CaMKK_Main_Pathway	NA	NA	NA	NA	NA	NA	NA	NA	NA	NA	NA	NA	NA
NA	reactome_CRMPs_in_Sema3A_signaling_Main_Pathway	NA	NA	NA	NA	NA	NA	NA	NA	NA	NA	NA	NA	NA
NA	reactome_Cyclin_A_B1_associated_events_during_G2_M_transition_Main_Pathway	NA	NA	NA	NA	NA	NA	NA	NA	NA	NA	NA	NA	NA
NA	reactome_Cyclin_A_Cdk2_associated_events_at_S_phase_entry_Main_Pathway	NA	NA	NA	NA	NA	NA	NA	NA	NA	NA	NA	NA	NA
NA	reactome_Cyclin_B2_mediated_events_Main_Pathway	NA	NA	NA	NA	NA	NA	NA	NA	NA	NA	NA	NA	NA
NA	reactome_Cyclin_E_associated_events_during_G1_S_transition_Main_Pathway	NA	NA	NA	NA	NA	NA	NA	NA	NA	NA	NA	NA	NA
NA	reactome_Cytosolic_iron_sulfur_cluster_assembly_Main_Pathway	NA	NA	NA	NA	NA	NA	NA	NA	NA	NA	NA	NA	NA
NA	reactome_Cytosolic_sensors_of_pathogen_associated_DNA_Main_Pathway	NA	NA	NA	NA	NA	NA	NA	NA	NA	NA	NA	NA	NA
NA	reactome_Cytosolic_tRNA_aminoacylation_Main_Pathway	NA	NA	NA	NA	NA	NA	NA	NA	NA	NA	NA	NA	NA
NA	reactome_DARPP_32_events_Main_Pathway	NA	NA	NA	NA	NA	NA	NA	NA	NA	NA	NA	NA	NA
NA	reactome_Deadenylation_of_mRNA_Main_Pathway	NA	NA	NA	NA	NA	NA	NA	NA	NA	NA	NA	NA	NA
NA	reactome_Degradation_of_cysteine_and_homocysteine_Main_Pathway	NA	NA	NA	NA	NA	NA	NA	NA	NA	NA	NA	NA	NA
NA	reactome_Depolymerisation_of_the_Nuclear_Lamina_Main_Pathway	NA	NA	NA	NA	NA	NA	NA	NA	NA	NA	NA	NA	NA
NA	reactome_Deposition_of_new_CENPA_containing_nucleosomes_at_the_centromere_Main_Pathway	NA	NA	NA	NA	NA	NA	NA	NA	NA	NA	NA	NA	NA
NA	reactome_Dimerization_of_procaspase_8_Main_Pathway	NA	NA	NA	NA	NA	NA	NA	NA	NA	NA	NA	NA	NA
NA	reactome_Displacement_of_DNA_glycosylase_by_APE1_Main_Pathway	NA	NA	NA	NA	NA	NA	NA	NA	NA	NA	NA	NA	NA
NA	reactome_DNA_Damage_Telomere_Stress_Induced_Senescence_Main_Pathway	NA	NA	NA	NA	NA	NA	NA	NA	NA	NA	NA	NA	NA
NA	reactome_DNA_replication_initiation_Main_Pathway	NA	NA	NA	NA	NA	NA	NA	NA	NA	NA	NA	NA	NA
NA	reactome_Dual_incision_reaction_in_GG_NER_Main_Pathway	NA	NA	NA	NA	NA	NA	NA	NA	NA	NA	NA	NA	NA
NA	reactome_Dual_incision_reaction_in_TC_NER_Main_Pathway	NA	NA	NA	NA	NA	NA	NA	NA	NA	NA	NA	NA	NA
NA	reactome_E2F_enabled_inhibition_of_pre_replication_complex_formation_Main_Pathway	NA	NA	NA	NA	NA	NA	NA	NA	NA	NA	NA	NA	NA
NA	reactome_E2F_mediated_regulation_of_DNA_replication_Main_Pathway	NA	NA	NA	NA	NA	NA	NA	NA	NA	NA	NA	NA	NA
NA	reactome_Early_Phase_of_HIV_Life_Cycle_Main_Pathway	NA	NA	NA	NA	NA	NA	NA	NA	NA	NA	NA	NA	NA
NA	reactome_Electric_Transmission_Across_Gap_Junctions_Main_Pathway	NA	NA	NA	NA	NA	NA	NA	NA	NA	NA	NA	NA	NA
NA	reactome_Elongation_arrest_and_recovery_Main_Pathway	NA	NA	NA	NA	NA	NA	NA	NA	NA	NA	NA	NA	NA
NA	reactome_ERK_MAPK_targets_Main_Pathway	NA	NA	NA	NA	NA	NA	NA	NA	NA	NA	NA	NA	NA
NA	reactome_ERK1_activation_Main_Pathway	NA	NA	NA	NA	NA	NA	NA	NA	NA	NA	NA	NA	NA
NA	reactome_Establishment_of_Sister_Chromatid_Cohesion_Main_Pathway	NA	NA	NA	NA	NA	NA	NA	NA	NA	NA	NA	NA	NA
NA	reactome_Eukaryotic_Translation_Elongation_Main_Pathway	NA	NA	NA	NA	NA	NA	NA	NA	NA	NA	NA	NA	NA
NA	reactome_Fanconi_Anemia_Main_Pathway	NA	NA	NA	NA	NA	NA	NA	NA	NA	NA	NA	NA	NA
NA	reactome_Fatty_Acyl_CoA_Biosynthesis_Main_Pathway	NA	NA	NA	NA	NA	NA	NA	NA	NA	NA	NA	NA	NA
NA	reactome_FGFR2b_ligand_binding_and_activation_Main_Pathway	NA	NA	NA	NA	NA	NA	NA	NA	NA	NA	NA	NA	NA
NA	reactome_Folding_of_actin_by_CCT_TriC_Main_Pathway	NA	NA	NA	NA	NA	NA	NA	NA	NA	NA	NA	NA	NA
NA	reactome_Formation_of_HIV_1_elongation_complex_containing_HIV_1_Tat_Main_Pathway	NA	NA	NA	NA	NA	NA	NA	NA	NA	NA	NA	NA	NA
NA	reactome_Formation_of_HIV_elongation_complex_in_the_absence_of_HIV_Tat_Main_Pathway	NA	NA	NA	NA	NA	NA	NA	NA	NA	NA	NA	NA	NA
NA	reactome_Formation_of_incision_complex_in_GG_NER_Main_Pathway	NA	NA	NA	NA	NA	NA	NA	NA	NA	NA	NA	NA	NA
NA	reactome_Formation_of_RNA_Pol_II_elongation_complex_Main_Pathway	NA	NA	NA	NA	NA	NA	NA	NA	NA	NA	NA	NA	NA
NA	reactome_Formation_of_Senescence_Associated_Heterochromatin_Foci_SAHF__Main_Pathway	NA	NA	NA	NA	NA	NA	NA	NA	NA	NA	NA	NA	NA
NA	reactome_Formation_of_the_active_cofactor_UDP_glucuronate_Main_Pathway	NA	NA	NA	NA	NA	NA	NA	NA	NA	NA	NA	NA	NA
NA	reactome_formation_of_the_beta_catenin_TCF_transactivating_complex_Main_Pathway	NA	NA	NA	NA	NA	NA	NA	NA	NA	NA	NA	NA	NA
NA	reactome_Formation_of_the_Early_Elongation_Complex_Main_Pathway	NA	NA	NA	NA	NA	NA	NA	NA	NA	NA	NA	NA	NA
NA	reactome_Formation_of_the_HIV_1_Early_Elongation_Complex_Main_Pathway	NA	NA	NA	NA	NA	NA	NA	NA	NA	NA	NA	NA	NA
NA	reactome_Formation_of_transcription_coupled_NER_TC_NER_repair_complex_Main_Pathway	NA	NA	NA	NA	NA	NA	NA	NA	NA	NA	NA	NA	NA
NA	reactome_Formation_of_tubulin_folding_intermediates_by_CCT_TriC_Main_Pathway	NA	NA	NA	NA	NA	NA	NA	NA	NA	NA	NA	NA	NA
NA	reactome_G0_and_Early_G1_Main_Pathway	NA	NA	NA	NA	NA	NA	NA	NA	NA	NA	NA	NA	NA
NA	reactome_G1_S_Specific_Transcription_Main_Pathway	NA	NA	NA	NA	NA	NA	NA	NA	NA	NA	NA	NA	NA
NA	reactome_G2_M_DNA_damage_checkpoint_Main_Pathway	NA	NA	NA	NA	NA	NA	NA	NA	NA	NA	NA	NA	NA
NA	reactome_G2_M_DNA_replication_checkpoint_Main_Pathway	NA	NA	NA	NA	NA	NA	NA	NA	NA	NA	NA	NA	NA
NA	reactome_G2_Phase_Main_Pathway	NA	NA	NA	NA	NA	NA	NA	NA	NA	NA	NA	NA	NA
NA	reactome_Gastrin_CREB_signalling_pathway_via_PKC_and_MAPK_Main_Pathway	NA	NA	NA	NA	NA	NA	NA	NA	NA	NA	NA	NA	NA
NA	reactome_Glutathione_synthesis_and_recycling_Main_Pathway	NA	NA	NA	NA	NA	NA	NA	NA	NA	NA	NA	NA	NA
NA	reactome_HATs_acetylate_histones_Main_Pathway	NA	NA	NA	NA	NA	NA	NA	NA	NA	NA	NA	NA	NA
NA	reactome_HDACs_deacetylate_histones_Main_Pathway	NA	NA	NA	NA	NA	NA	NA	NA	NA	NA	NA	NA	NA
NA	reactome_HDL_mediated_lipid_transport_Main_Pathway	NA	NA	NA	NA	NA	NA	NA	NA	NA	NA	NA	NA	NA
NA	reactome_HDMs_demethylate_histones_Main_Pathway	NA	NA	NA	NA	NA	NA	NA	NA	NA	NA	NA	NA	NA
NA	reactome_Heme_biosynthesis_Main_Pathway	NA	NA	NA	NA	NA	NA	NA	NA	NA	NA	NA	NA	NA
NA	reactome_Heme_degradation_Main_Pathway	NA	NA	NA	NA	NA	NA	NA	NA	NA	NA	NA	NA	NA
NA	reactome_HIV_elongation_arrest_and_recovery_Main_Pathway	NA	NA	NA	NA	NA	NA	NA	NA	NA	NA	NA	NA	NA
NA	reactome_HIV_Transcription_Initiation_Main_Pathway	NA	NA	NA	NA	NA	NA	NA	NA	NA	NA	NA	NA	NA
NA	reactome_HS_GAG_biosynthesis_Main_Pathway	NA	NA	NA	NA	NA	NA	NA	NA	NA	NA	NA	NA	NA
NA	reactome_HS_GAG_degradation_Main_Pathway	NA	NA	NA	NA	NA	NA	NA	NA	NA	NA	NA	NA	NA
NA	reactome_HuR_stabilizes_mRNA_Main_Pathway	NA	NA	NA	NA	NA	NA	NA	NA	NA	NA	NA	NA	NA
NA	reactome_Hyaluronan_uptake_and_degradation_Main_Pathway	NA	NA	NA	NA	NA	NA	NA	NA	NA	NA	NA	NA	NA
NA	reactome_Hydrolysis_of_LPC_Main_Pathway	NA	NA	NA	NA	NA	NA	NA	NA	NA	NA	NA	NA	NA
NA	reactome_Inactivation_of_APC_C_via_direct_inhibition_of_the_APC_C_complex_Main_Pathway	NA	NA	NA	NA	NA	NA	NA	NA	NA	NA	NA	NA	NA
NA	reactome_Inactivation_of_Cdc42_and_Rac_Main_Pathway	NA	NA	NA	NA	NA	NA	NA	NA	NA	NA	NA	NA	NA
NA	reactome_Inhibition_of_replication_initiation_of_damaged_DNA_by_RB1_E2F1_Main_Pathway	NA	NA	NA	NA	NA	NA	NA	NA	NA	NA	NA	NA	NA
NA	reactome_Inhibition_of_TSC_complex_formation_by_PKB_Main_Pathway	NA	NA	NA	NA	NA	NA	NA	NA	NA	NA	NA	NA	NA
NA	reactome_Insulin_like_Growth_Factor_2_mRNA_Binding_Proteins_IGF2BPs_IMPs_VICKZs_bind_RNA_Main_Pathway	NA	NA	NA	NA	NA	NA	NA	NA	NA	NA	NA	NA	NA
NA	reactome_Integration_of_energy_metabolism_Main_Pathway	NA	NA	NA	NA	NA	NA	NA	NA	NA	NA	NA	NA	NA
NA	reactome_Integration_of_provirus_Main_Pathway	NA	NA	NA	NA	NA	NA	NA	NA	NA	NA	NA	NA	NA
NA	reactome_Integration_of_viral_DNA_into_host_genomic_DNA_Main_Pathway	NA	NA	NA	NA	NA	NA	NA	NA	NA	NA	NA	NA	NA
NA	reactome_Interleukin_1_signaling_Main_Pathway	NA	NA	NA	NA	NA	NA	NA	NA	NA	NA	NA	NA	NA
NA	reactome_Iron_uptake_and_transport_Main_Pathway	NA	NA	NA	NA	NA	NA	NA	NA	NA	NA	NA	NA	NA
NA	reactome_Kinesins_Main_Pathway	NA	NA	NA	NA	NA	NA	NA	NA	NA	NA	NA	NA	NA
NA	reactome_KSRP_destabilizes_mRNA_Main_Pathway	NA	NA	NA	NA	NA	NA	NA	NA	NA	NA	NA	NA	NA
NA	reactome_Leading_Strand_Synthesis_Main_Pathway	NA	NA	NA	NA	NA	NA	NA	NA	NA	NA	NA	NA	NA
NA	reactome_Linoleic_acid_LA_metabolism_Main_Pathway	NA	NA	NA	NA	NA	NA	NA	NA	NA	NA	NA	NA	NA
NA	reactome_Loss_of_Nlp_from_mitotic_centrosomes_Main_Pathway	NA	NA	NA	NA	NA	NA	NA	NA	NA	NA	NA	NA	NA
NA	reactome_Loss_of_proteins_required_for_interphase_microtubule_organizationA_from_the_centrosome_Main_Pathway	NA	NA	NA	NA	NA	NA	NA	NA	NA	NA	NA	NA	NA
NA	reactome_LRR_FLII_interacting_protein_1_LRRFIP1_activates_type_I_IFN_production_Main_Pathway	NA	NA	NA	NA	NA	NA	NA	NA	NA	NA	NA	NA	NA
NA	reactome_Meiotic_recombination_Main_Pathway	NA	NA	NA	NA	NA	NA	NA	NA	NA	NA	NA	NA	NA
NA	reactome_Meiotic_synapsis_Main_Pathway	NA	NA	NA	NA	NA	NA	NA	NA	NA	NA	NA	NA	NA
NA	reactome_Metabolism_of_folate_and_pterines_Main_Pathway	NA	NA	NA	NA	NA	NA	NA	NA	NA	NA	NA	NA	NA
NA	reactome_Metabolism_of_polyamines_Main_Pathway	NA	NA	NA	NA	NA	NA	NA	NA	NA	NA	NA	NA	NA
NA	reactome_Methylation_Main_Pathway	NA	NA	NA	NA	NA	NA	NA	NA	NA	NA	NA	NA	NA
NA	reactome_MHC_class_II_antigen_presentation_Main_Pathway	NA	NA	NA	NA	NA	NA	NA	NA	NA	NA	NA	NA	NA
NA	reactome_Mismatch_repair_MMR_directed_by_MSH2_MSH3_MutSbeta__Main_Pathway	NA	NA	NA	NA	NA	NA	NA	NA	NA	NA	NA	NA	NA
NA	reactome_Mismatch_repair_MMR_directed_by_MSH2_MSH6_MutSalpha__Main_Pathway	NA	NA	NA	NA	NA	NA	NA	NA	NA	NA	NA	NA	NA
NA	reactome_Mitochondrial_transcription_initiation_Main_Pathway	NA	NA	NA	NA	NA	NA	NA	NA	NA	NA	NA	NA	NA
NA	reactome_Mitochondrial_tRNA_aminoacylation_Main_Pathway	NA	NA	NA	NA	NA	NA	NA	NA	NA	NA	NA	NA	NA
NA	reactome_Mitotic_Prometaphase_Main_Pathway	NA	NA	NA	NA	NA	NA	NA	NA	NA	NA	NA	NA	NA
NA	reactome_Molybdenum_cofactor_biosynthesis_Main_Pathway	NA	NA	NA	NA	NA	NA	NA	NA	NA	NA	NA	NA	NA
NA	reactome_mRNA_3_end_processing_Main_Pathway	NA	NA	NA	NA	NA	NA	NA	NA	NA	NA	NA	NA	NA
NA	reactome_mRNA_Capping_Main_Pathway	NA	NA	NA	NA	NA	NA	NA	NA	NA	NA	NA	NA	NA
NA	reactome_mRNA_decay_by_3_to_5_exoribonuclease_Main_Pathway	NA	NA	NA	NA	NA	NA	NA	NA	NA	NA	NA	NA	NA
NA	reactome_mRNA_decay_by_5_to_3_exoribonuclease_Main_Pathway	NA	NA	NA	NA	NA	NA	NA	NA	NA	NA	NA	NA	NA
NA	reactome_Muscarinic_acetylcholine_receptors_Main_Pathway	NA	NA	NA	NA	NA	NA	NA	NA	NA	NA	NA	NA	NA
NA	reactome_NCAM_signaling_for_neurite_out_growth_Main_Pathway	NA	NA	NA	NA	NA	NA	NA	NA	NA	NA	NA	NA	NA
NA	reactome_negative_regulation_of_TCF_dependent_signaling_by_DVL_interacting_proteins_Main_Pathway	NA	NA	NA	NA	NA	NA	NA	NA	NA	NA	NA	NA	NA
NA	reactome_NEP_NS2_Interacts_with_the_Cellular_Export_Machinery_Main_Pathway	NA	NA	NA	NA	NA	NA	NA	NA	NA	NA	NA	NA	NA
NA	reactome_Netrin_mediated_repulsion_signals_Main_Pathway	NA	NA	NA	NA	NA	NA	NA	NA	NA	NA	NA	NA	NA
NA	reactome_NICD_traffics_to_nucleus_Main_Pathway	NA	NA	NA	NA	NA	NA	NA	NA	NA	NA	NA	NA	NA
NA	reactome_NOD1_2_Signaling_Pathway_Main_Pathway	NA	NA	NA	NA	NA	NA	NA	NA	NA	NA	NA	NA	NA
NA	reactome_Nonhomologous_End_joining_NHEJ__Main_Pathway	NA	NA	NA	NA	NA	NA	NA	NA	NA	NA	NA	NA	NA
NA	reactome_NoRC_negatively_regulates_rRNA_expression_Main_Pathway	NA	NA	NA	NA	NA	NA	NA	NA	NA	NA	NA	NA	NA
NA	reactome_Notch_HLH_transcription_Main_Pathway	NA	NA	NA	NA	NA	NA	NA	NA	NA	NA	NA	NA	NA
NA	reactome_NOTCH1_Intracellular_Domain_Regulates_Transcription_Main_Pathway	NA	NA	NA	NA	NA	NA	NA	NA	NA	NA	NA	NA	NA
NA	reactome_NOTCH2_intracellular_domain_regulates_transcription_Main_Pathway	NA	NA	NA	NA	NA	NA	NA	NA	NA	NA	NA	NA	NA
NA	reactome_NRIF_signals_cell_death_from_the_nucleus_Main_Pathway	NA	NA	NA	NA	NA	NA	NA	NA	NA	NA	NA	NA	NA
NA	reactome_Nuclear_import_of_Rev_protein_Main_Pathway	NA	NA	NA	NA	NA	NA	NA	NA	NA	NA	NA	NA	NA
NA	reactome_Nuclear_Pore_Complex_NPC_Disassembly_Main_Pathway	NA	NA	NA	NA	NA	NA	NA	NA	NA	NA	NA	NA	NA
NA	reactome_Nuclear_Receptor_transcription_Main_Pathway	NA	NA	NA	NA	NA	NA	NA	NA	NA	NA	NA	NA	NA
NA	reactome_O_linked_glycosylation_of_mucins_Main_Pathway	NA	NA	NA	NA	NA	NA	NA	NA	NA	NA	NA	NA	NA
NA	reactome_Orc1_removal_from_chromatin_Main_Pathway	NA	NA	NA	NA	NA	NA	NA	NA	NA	NA	NA	NA	NA
NA	reactome_P2Y_receptors_Main_Pathway	NA	NA	NA	NA	NA	NA	NA	NA	NA	NA	NA	NA	NA
NA	reactome_p53_Dependent_G1_DNA_Damage_Response_Main_Pathway	NA	NA	NA	NA	NA	NA	NA	NA	NA	NA	NA	NA	NA
NA	reactome_p75NTR_negatively_regulates_cell_cycle_via_SC1_Main_Pathway	NA	NA	NA	NA	NA	NA	NA	NA	NA	NA	NA	NA	NA
NA	reactome_Packaging_Of_Telomere_Ends_Main_Pathway	NA	NA	NA	NA	NA	NA	NA	NA	NA	NA	NA	NA	NA
NA	reactome_Pausing_and_recovery_of_HIV_elongation_Main_Pathway	NA	NA	NA	NA	NA	NA	NA	NA	NA	NA	NA	NA	NA
NA	reactome_Pausing_and_recovery_of_Tat_mediated_HIV_elongation_Main_Pathway	NA	NA	NA	NA	NA	NA	NA	NA	NA	NA	NA	NA	NA
NA	reactome_PCP_CE_Main_Pathway	NA	NA	NA	NA	NA	NA	NA	NA	NA	NA	NA	NA	NA
NA	reactome_Pentose_phosphate_pathway_hexose_monophosphate_shunt__Main_Pathway	NA	NA	NA	NA	NA	NA	NA	NA	NA	NA	NA	NA	NA
NA	reactome_Phosphate_bond_hydrolysis_by_NUDT_proteins_Main_Pathway	NA	NA	NA	NA	NA	NA	NA	NA	NA	NA	NA	NA	NA
NA	reactome_Phosphorylation_of_Emi1_Main_Pathway	NA	NA	NA	NA	NA	NA	NA	NA	NA	NA	NA	NA	NA
NA	reactome_Phosphorylation_of_proteins_involved_in_G1_S_transition_by_active_Cyclin_E_Cdk2_complexes_Main_Pathway	NA	NA	NA	NA	NA	NA	NA	NA	NA	NA	NA	NA	NA
NA	reactome_Phosphorylation_of_proteins_involved_in_the_G2_M_transition_by_Cyclin_A_Cdc2_complexes_Main_Pathway	NA	NA	NA	NA	NA	NA	NA	NA	NA	NA	NA	NA	NA
NA	reactome_Phosphorylation_of_the_APC_C_Main_Pathway	NA	NA	NA	NA	NA	NA	NA	NA	NA	NA	NA	NA	NA
NA	reactome_PLC_gamma1_signalling_Main_Pathway	NA	NA	NA	NA	NA	NA	NA	NA	NA	NA	NA	NA	NA
NA	reactome_Polo_like_kinase_mediated_events_Main_Pathway	NA	NA	NA	NA	NA	NA	NA	NA	NA	NA	NA	NA	NA
NA	reactome_Polymerase_switching_Main_Pathway	NA	NA	NA	NA	NA	NA	NA	NA	NA	NA	NA	NA	NA
NA	reactome_Polymerase_switching_on_the_C_strand_of_the_telomere_Main_Pathway	NA	NA	NA	NA	NA	NA	NA	NA	NA	NA	NA	NA	NA
NA	reactome_Post_transcriptional_silencing_by_small_RNAs_Main_Pathway	NA	NA	NA	NA	NA	NA	NA	NA	NA	NA	NA	NA	NA
NA	reactome_PP2A_mediated_dephosphorylation_of_key_metabolic_factors_Main_Pathway	NA	NA	NA	NA	NA	NA	NA	NA	NA	NA	NA	NA	NA
NA	reactome_PPARA_activates_gene_expression_Main_Pathway	NA	NA	NA	NA	NA	NA	NA	NA	NA	NA	NA	NA	NA
NA	reactome_PRC2_methylates_histones_and_DNA_Main_Pathway	NA	NA	NA	NA	NA	NA	NA	NA	NA	NA	NA	NA	NA
NA	reactome_pre_mRNA_splicing_Main_Pathway	NA	NA	NA	NA	NA	NA	NA	NA	NA	NA	NA	NA	NA
NA	reactome_Prefoldin_mediated_transfer_of_substrate_to_CCT_TriC_Main_Pathway	NA	NA	NA	NA	NA	NA	NA	NA	NA	NA	NA	NA	NA
NA	reactome_Presynaptic_phase_of_homologous_DNA_pairing_and_strand_exchange_Main_Pathway	NA	NA	NA	NA	NA	NA	NA	NA	NA	NA	NA	NA	NA
NA	reactome_Processing_of_Capped_Intron_Containing_Pre_mRNA_Main_Pathway	NA	NA	NA	NA	NA	NA	NA	NA	NA	NA	NA	NA	NA
NA	reactome_Processing_of_DNA_double_strand_break_ends_Main_Pathway	NA	NA	NA	NA	NA	NA	NA	NA	NA	NA	NA	NA	NA
NA	reactome_Processing_of_DNA_ends_prior_to_end_rejoining_Main_Pathway	NA	NA	NA	NA	NA	NA	NA	NA	NA	NA	NA	NA	NA
NA	reactome_Processing_of_Intronless_Pre_mRNAs_Main_Pathway	NA	NA	NA	NA	NA	NA	NA	NA	NA	NA	NA	NA	NA
NA	reactome_Processive_synthesis_on_the_C_strand_of_the_telomere_Main_Pathway	NA	NA	NA	NA	NA	NA	NA	NA	NA	NA	NA	NA	NA
NA	reactome_Processive_synthesis_on_the_lagging_strand_Main_Pathway	NA	NA	NA	NA	NA	NA	NA	NA	NA	NA	NA	NA	NA
NA	reactome_Prostanoid_ligand_receptors_Main_Pathway	NA	NA	NA	NA	NA	NA	NA	NA	NA	NA	NA	NA	NA
NA	reactome_Proton_coupled_monocarboxylate_transport_Main_Pathway	NA	NA	NA	NA	NA	NA	NA	NA	NA	NA	NA	NA	NA
NA	reactome_Purine_ribonucleoside_monophosphate_biosynthesis_Main_Pathway	NA	NA	NA	NA	NA	NA	NA	NA	NA	NA	NA	NA	NA
NA	reactome_Purine_salvage_Main_Pathway	NA	NA	NA	NA	NA	NA	NA	NA	NA	NA	NA	NA	NA
NA	reactome_Pyrimidine_biosynthesis_Main_Pathway	NA	NA	NA	NA	NA	NA	NA	NA	NA	NA	NA	NA	NA
NA	reactome_Pyrimidine_salvage_reactions_Main_Pathway	NA	NA	NA	NA	NA	NA	NA	NA	NA	NA	NA	NA	NA
NA	reactome_Recognition_and_association_of_DNA_glycosylase_with_site_containing_an_affected_purine_Main_Pathway	NA	NA	NA	NA	NA	NA	NA	NA	NA	NA	NA	NA	NA
NA	reactome_Recruitment_of_mitotic_centrosome_proteins_and_complexes_Main_Pathway	NA	NA	NA	NA	NA	NA	NA	NA	NA	NA	NA	NA	NA
NA	reactome_Recruitment_of_NuMA_to_mitotic_centrosomes_Main_Pathway	NA	NA	NA	NA	NA	NA	NA	NA	NA	NA	NA	NA	NA
NA	reactome_Recruitment_of_repair_and_signaling_proteins_to_double_strand_breaks_Main_Pathway	NA	NA	NA	NA	NA	NA	NA	NA	NA	NA	NA	NA	NA
NA	reactome_Regulation_of_APC_C_activators_between_G1_S_and_early_anaphase_Main_Pathway	NA	NA	NA	NA	NA	NA	NA	NA	NA	NA	NA	NA	NA
NA	reactome_Regulation_of_Commissural_axon_pathfinding_by_Slit_and_Robo_Main_Pathway	NA	NA	NA	NA	NA	NA	NA	NA	NA	NA	NA	NA	NA
NA	reactome_Regulation_of_gene_expression_by_Hypoxia_inducible_Factor_Main_Pathway	NA	NA	NA	NA	NA	NA	NA	NA	NA	NA	NA	NA	NA
NA	reactome_Regulation_of_Glucokinase_by_Glucokinase_Regulatory_Protein_Main_Pathway	NA	NA	NA	NA	NA	NA	NA	NA	NA	NA	NA	NA	NA
NA	reactome_Regulation_of_lipid_metabolism_by_Peroxisome_proliferator_activated_receptor_alpha_PPARalpha__Main_Pathway	NA	NA	NA	NA	NA	NA	NA	NA	NA	NA	NA	NA	NA
NA	reactome_Regulation_of_ornithine_decarboxylase_ODC__Main_Pathway	NA	NA	NA	NA	NA	NA	NA	NA	NA	NA	NA	NA	NA
NA	reactome_Regulation_of_PLK1_Activity_at_G2_M_Transition_Main_Pathway	NA	NA	NA	NA	NA	NA	NA	NA	NA	NA	NA	NA	NA
NA	reactome_Regulation_of_pyruvate_dehydrogenase_PDH_complex_Main_Pathway	NA	NA	NA	NA	NA	NA	NA	NA	NA	NA	NA	NA	NA
NA	reactome_Regulation_of_the_Fanconi_anemia_Main_Pathway	NA	NA	NA	NA	NA	NA	NA	NA	NA	NA	NA	NA	NA
NA	reactome_Release_of_eIF4E_Main_Pathway	NA	NA	NA	NA	NA	NA	NA	NA	NA	NA	NA	NA	NA
NA	reactome_Removal_of_DNA_patch_containing_abasic_residue_Main_Pathway	NA	NA	NA	NA	NA	NA	NA	NA	NA	NA	NA	NA	NA
NA	reactome_Removal_of_the_Flap_Intermediate_from_the_C_strand_Main_Pathway	NA	NA	NA	NA	NA	NA	NA	NA	NA	NA	NA	NA	NA
NA	reactome_Removal_of_the_Flap_Intermediate_Main_Pathway	NA	NA	NA	NA	NA	NA	NA	NA	NA	NA	NA	NA	NA
NA	reactome_Repair_synthesis_for_gap_filling_by_DNA_polymerase_in_TC_NER_Main_Pathway	NA	NA	NA	NA	NA	NA	NA	NA	NA	NA	NA	NA	NA
NA	reactome_Repair_synthesis_of_patch_27_30_bases_long_by_DNA_polymerase_Main_Pathway	NA	NA	NA	NA	NA	NA	NA	NA	NA	NA	NA	NA	NA
NA	reactome_repression_of_WNT_target_genes_Main_Pathway	NA	NA	NA	NA	NA	NA	NA	NA	NA	NA	NA	NA	NA
NA	reactome_Resolution_of_AP_sites_via_the_multiple_nucleotide_patch_replacement_Main_Pathway	NA	NA	NA	NA	NA	NA	NA	NA	NA	NA	NA	NA	NA
NA	reactome_Resolution_of_AP_sites_via_the_single_nucleotide_replacement_Main_Pathway	NA	NA	NA	NA	NA	NA	NA	NA	NA	NA	NA	NA	NA
NA	reactome_Resolution_of_Sister_Chromatid_Cohesion_Main_Pathway	NA	NA	NA	NA	NA	NA	NA	NA	NA	NA	NA	NA	NA
NA	reactome_Response_to_elevated_platelet_cytosolic_Ca2__Main_Pathway	NA	NA	NA	NA	NA	NA	NA	NA	NA	NA	NA	NA	NA
NA	reactome_Retinoid_metabolism_and_transport_Main_Pathway	NA	NA	NA	NA	NA	NA	NA	NA	NA	NA	NA	NA	NA
NA	reactome_Rev_mediated_nuclear_export_of_HIV_RNA_Main_Pathway	NA	NA	NA	NA	NA	NA	NA	NA	NA	NA	NA	NA	NA
NA	reactome_Rho_GTPase_cycle_Main_Pathway	NA	NA	NA	NA	NA	NA	NA	NA	NA	NA	NA	NA	NA
NA	reactome_RMTs_methylate_histone_arginines_Main_Pathway	NA	NA	NA	NA	NA	NA	NA	NA	NA	NA	NA	NA	NA
NA	reactome_RNA_Pol_II_CTD_phosphorylation_and_interaction_with_CE_Main_Pathway	NA	NA	NA	NA	NA	NA	NA	NA	NA	NA	NA	NA	NA
NA	reactome_RNA_Polymerase_I_Chain_Elongation_Main_Pathway	NA	NA	NA	NA	NA	NA	NA	NA	NA	NA	NA	NA	NA
NA	reactome_RNA_Polymerase_I_Promoter_Escape_Main_Pathway	NA	NA	NA	NA	NA	NA	NA	NA	NA	NA	NA	NA	NA
NA	reactome_RNA_Polymerase_I_Transcription_Initiation_Main_Pathway	NA	NA	NA	NA	NA	NA	NA	NA	NA	NA	NA	NA	NA
NA	reactome_RNA_Polymerase_I_Transcription_Termination_Main_Pathway	NA	NA	NA	NA	NA	NA	NA	NA	NA	NA	NA	NA	NA
NA	reactome_RNA_Polymerase_II_HIV_Promoter_Escape_Main_Pathway	NA	NA	NA	NA	NA	NA	NA	NA	NA	NA	NA	NA	NA
NA	reactome_RNA_Polymerase_II_Pre_transcription_Events_Main_Pathway	NA	NA	NA	NA	NA	NA	NA	NA	NA	NA	NA	NA	NA
NA	reactome_RNA_Polymerase_II_Promoter_Escape_Main_Pathway	NA	NA	NA	NA	NA	NA	NA	NA	NA	NA	NA	NA	NA
NA	reactome_RNA_Polymerase_II_Transcription_Elongation_Main_Pathway	NA	NA	NA	NA	NA	NA	NA	NA	NA	NA	NA	NA	NA
NA	reactome_RNA_Polymerase_II_Transcription_Initiation_And_Promoter_Clearance_Main_Pathway	NA	NA	NA	NA	NA	NA	NA	NA	NA	NA	NA	NA	NA
NA	reactome_RNA_Polymerase_II_Transcription_Initiation_Main_Pathway	NA	NA	NA	NA	NA	NA	NA	NA	NA	NA	NA	NA	NA
NA	reactome_RNA_Polymerase_II_Transcription_Pre_Initiation_And_Promoter_Opening_Main_Pathway	NA	NA	NA	NA	NA	NA	NA	NA	NA	NA	NA	NA	NA
NA	reactome_RNA_Polymerase_III_Abortive_And_Retractive_Initiation_Main_Pathway	NA	NA	NA	NA	NA	NA	NA	NA	NA	NA	NA	NA	NA
NA	reactome_RNA_Polymerase_III_Transcription_Initiation_From_Type_1_Promoter_Main_Pathway	NA	NA	NA	NA	NA	NA	NA	NA	NA	NA	NA	NA	NA
NA	reactome_RNA_Polymerase_III_Transcription_Initiation_From_Type_2_Promoter_Main_Pathway	NA	NA	NA	NA	NA	NA	NA	NA	NA	NA	NA	NA	NA
NA	reactome_RNA_Polymerase_III_Transcription_Termination_Main_Pathway	NA	NA	NA	NA	NA	NA	NA	NA	NA	NA	NA	NA	NA
NA	reactome_Role_of_Abl_in_Robo_Slit_signaling_Main_Pathway	NA	NA	NA	NA	NA	NA	NA	NA	NA	NA	NA	NA	NA
NA	reactome_Role_of_second_messengers_in_netrin_1_signaling_Main_Pathway	NA	NA	NA	NA	NA	NA	NA	NA	NA	NA	NA	NA	NA
NA	reactome_S6K1_signalling_Main_Pathway	NA	NA	NA	NA	NA	NA	NA	NA	NA	NA	NA	NA	NA
NA	reactome_Scavenging_by_Class_F_Receptors_Main_Pathway	NA	NA	NA	NA	NA	NA	NA	NA	NA	NA	NA	NA	NA
NA	reactome_SCF_Skp2_mediated_degradation_of_p27_p21_Main_Pathway	NA	NA	NA	NA	NA	NA	NA	NA	NA	NA	NA	NA	NA
NA	reactome_Sema3A_PAK_dependent_Axon_repulsion_Main_Pathway	NA	NA	NA	NA	NA	NA	NA	NA	NA	NA	NA	NA	NA
NA	reactome_SEMA3A_Plexin_repulsion_signaling_by_inhibiting_Integrin_adhesion_Main_Pathway	NA	NA	NA	NA	NA	NA	NA	NA	NA	NA	NA	NA	NA
NA	reactome_Senescence_Associated_Secretory_Phenotype_SASP__Main_Pathway	NA	NA	NA	NA	NA	NA	NA	NA	NA	NA	NA	NA	NA
NA	reactome_Separation_of_Sister_Chromatids_Main_Pathway	NA	NA	NA	NA	NA	NA	NA	NA	NA	NA	NA	NA	NA
NA	reactome_Serine_biosynthesis_Main_Pathway	NA	NA	NA	NA	NA	NA	NA	NA	NA	NA	NA	NA	NA
NA	reactome_SHC_activation_Main_Pathway	NA	NA	NA	NA	NA	NA	NA	NA	NA	NA	NA	NA	NA
NA	reactome_Signaling_by_BMP_Main_Pathway	NA	NA	NA	NA	NA	NA	NA	NA	NA	NA	NA	NA	NA
NA	reactome_Signaling_by_FGFR1_fusion_mutants_Main_Pathway	NA	NA	NA	NA	NA	NA	NA	NA	NA	NA	NA	NA	NA
NA	reactome_Signaling_by_NODAL_Main_Pathway	NA	NA	NA	NA	NA	NA	NA	NA	NA	NA	NA	NA	NA
NA	reactome_Signaling_by_Robo_receptor_Main_Pathway	NA	NA	NA	NA	NA	NA	NA	NA	NA	NA	NA	NA	NA
NA	reactome_SIRT1_negatively_regulates_rRNA_Expression_Main_Pathway	NA	NA	NA	NA	NA	NA	NA	NA	NA	NA	NA	NA	NA
NA	reactome_SLBP_Dependent_Processing_of_Replication_Dependent_Histone_Pre_mRNAs_Main_Pathway	NA	NA	NA	NA	NA	NA	NA	NA	NA	NA	NA	NA	NA
NA	reactome_SLBP_independent_Processing_of_Histone_Pre_mRNAs_Main_Pathway	NA	NA	NA	NA	NA	NA	NA	NA	NA	NA	NA	NA	NA
NA	reactome_SMAD2_SMAD3_SMAD4_heterotrimer_regulates_transcription_Main_Pathway	NA	NA	NA	NA	NA	NA	NA	NA	NA	NA	NA	NA	NA
NA	reactome_snRNP_Assembly_Main_Pathway	NA	NA	NA	NA	NA	NA	NA	NA	NA	NA	NA	NA	NA
NA	reactome_Sodium_Proton_exchangers_Main_Pathway	NA	NA	NA	NA	NA	NA	NA	NA	NA	NA	NA	NA	NA
NA	reactome_STING_mediated_induction_of_host_immune_responses_Main_Pathway	NA	NA	NA	NA	NA	NA	NA	NA	NA	NA	NA	NA	NA
NA	reactome_Sulfur_amino_acid_metabolism_Main_Pathway	NA	NA	NA	NA	NA	NA	NA	NA	NA	NA	NA	NA	NA
NA	reactome_SUMO_is_conjugated_to_E1_UBA2_SAE1__Main_Pathway	NA	NA	NA	NA	NA	NA	NA	NA	NA	NA	NA	NA	NA
NA	reactome_SUMO_is_proteolytically_processed_Main_Pathway	NA	NA	NA	NA	NA	NA	NA	NA	NA	NA	NA	NA	NA
NA	reactome_SUMO_is_transferred_from_E1_to_E2_UBE2I_UBC9__Main_Pathway	NA	NA	NA	NA	NA	NA	NA	NA	NA	NA	NA	NA	NA
NA	reactome_Switching_of_origins_to_a_post_replicative_state_Main_Pathway	NA	NA	NA	NA	NA	NA	NA	NA	NA	NA	NA	NA	NA
NA	reactome_Synthesis_of_16_20_hydroxyeicosatetraenoic_acids_HETE__Main_Pathway	NA	NA	NA	NA	NA	NA	NA	NA	NA	NA	NA	NA	NA
NA	reactome_Synthesis_of_bile_acids_and_bile_salts_via_24_hydroxycholesterol_Main_Pathway	NA	NA	NA	NA	NA	NA	NA	NA	NA	NA	NA	NA	NA
NA	reactome_Synthesis_of_bile_acids_and_bile_salts_via_27_hydroxycholesterol_Main_Pathway	NA	NA	NA	NA	NA	NA	NA	NA	NA	NA	NA	NA	NA
NA	reactome_Synthesis_of_bile_acids_and_bile_salts_via_7alpha_hydroxycholesterol_Main_Pathway	NA	NA	NA	NA	NA	NA	NA	NA	NA	NA	NA	NA	NA
NA	reactome_Synthesis_of_epoxy_EET_and_dihydroxyeicosatrienoic_acids_DHET__Main_Pathway	NA	NA	NA	NA	NA	NA	NA	NA	NA	NA	NA	NA	NA
NA	reactome_Synthesis_of_PA_Main_Pathway	NA	NA	NA	NA	NA	NA	NA	NA	NA	NA	NA	NA	NA
NA	reactome_Synthesis_of_PE_Main_Pathway	NA	NA	NA	NA	NA	NA	NA	NA	NA	NA	NA	NA	NA
NA	reactome_Synthesis_of_PIPs_at_the_early_endosome_membrane_Main_Pathway	NA	NA	NA	NA	NA	NA	NA	NA	NA	NA	NA	NA	NA
NA	reactome_Synthesis_of_PIPs_at_the_Golgi_membrane_Main_Pathway	NA	NA	NA	NA	NA	NA	NA	NA	NA	NA	NA	NA	NA
NA	reactome_Synthesis_of_PIPs_at_the_late_endosome_membrane_Main_Pathway	NA	NA	NA	NA	NA	NA	NA	NA	NA	NA	NA	NA	NA
NA	reactome_Synthesis_of_very_long_chain_fatty_acyl_CoAs_Main_Pathway	NA	NA	NA	NA	NA	NA	NA	NA	NA	NA	NA	NA	NA
NA	reactome_Tat_mediated_elongation_of_the_HIV_1_transcript_Main_Pathway	NA	NA	NA	NA	NA	NA	NA	NA	NA	NA	NA	NA	NA
NA	reactome_Tat_mediated_HIV_elongation_arrest_and_recovery_Main_Pathway	NA	NA	NA	NA	NA	NA	NA	NA	NA	NA	NA	NA	NA
NA	reactome_Telomere_C_strand_Lagging_Strand_Synthesis_Main_Pathway	NA	NA	NA	NA	NA	NA	NA	NA	NA	NA	NA	NA	NA
NA	reactome_Telomere_C_strand_synthesis_initiation_Main_Pathway	NA	NA	NA	NA	NA	NA	NA	NA	NA	NA	NA	NA	NA
NA	reactome_Telomere_Extension_By_Telomerase_Main_Pathway	NA	NA	NA	NA	NA	NA	NA	NA	NA	NA	NA	NA	NA
NA	reactome_Termination_of_O_glycan_biosynthesis_Main_Pathway	NA	NA	NA	NA	NA	NA	NA	NA	NA	NA	NA	NA	NA
NA	reactome_Toll_Like_Receptor_9_TLR9_Cascade_Main_Pathway	NA	NA	NA	NA	NA	NA	NA	NA	NA	NA	NA	NA	NA
NA	reactome_Toxicity_of_botulinum_toxin_type_A_BoNT_A__Main_Pathway	NA	NA	NA	NA	NA	NA	NA	NA	NA	NA	NA	NA	NA
NA	reactome_Toxicity_of_botulinum_toxin_type_C_BoNT_C__Main_Pathway	NA	NA	NA	NA	NA	NA	NA	NA	NA	NA	NA	NA	NA
NA	reactome_Toxicity_of_botulinum_toxin_type_D_BoNT_D__Main_Pathway	NA	NA	NA	NA	NA	NA	NA	NA	NA	NA	NA	NA	NA
NA	reactome_Toxicity_of_botulinum_toxin_type_E_BoNT_E__Main_Pathway	NA	NA	NA	NA	NA	NA	NA	NA	NA	NA	NA	NA	NA
NA	reactome_Toxicity_of_botulinum_toxin_type_F_BoNT_F__Main_Pathway	NA	NA	NA	NA	NA	NA	NA	NA	NA	NA	NA	NA	NA
NA	reactome_Transcription_coupled_NER_TC_NER__Main_Pathway	NA	NA	NA	NA	NA	NA	NA	NA	NA	NA	NA	NA	NA
NA	reactome_Transcription_of_the_HIV_genome_Main_Pathway	NA	NA	NA	NA	NA	NA	NA	NA	NA	NA	NA	NA	NA
NA	reactome_Transcriptional_activation_of_mitochondrial_biogenesis_Main_Pathway	NA	NA	NA	NA	NA	NA	NA	NA	NA	NA	NA	NA	NA
NA	reactome_Transcriptional_regulation_of_white_adipocyte_differentiation_Main_Pathway	NA	NA	NA	NA	NA	NA	NA	NA	NA	NA	NA	NA	NA
NA	reactome_Transport_of_Mature_mRNA_derived_from_an_Intron_Containing_Transcript_Main_Pathway	NA	NA	NA	NA	NA	NA	NA	NA	NA	NA	NA	NA	NA
NA	reactome_Transport_of_Mature_mRNA_Derived_from_an_Intronless_Transcript_Main_Pathway	NA	NA	NA	NA	NA	NA	NA	NA	NA	NA	NA	NA	NA
NA	reactome_Transport_of_Ribonucleoproteins_into_the_Host_Nucleus_Main_Pathway	NA	NA	NA	NA	NA	NA	NA	NA	NA	NA	NA	NA	NA
NA	reactome_Transport_of_the_SLBP_Dependant_Mature_mRNA_Main_Pathway	NA	NA	NA	NA	NA	NA	NA	NA	NA	NA	NA	NA	NA
NA	reactome_Transport_of_the_SLBP_independent_Mature_mRNA_Main_Pathway	NA	NA	NA	NA	NA	NA	NA	NA	NA	NA	NA	NA	NA
NA	reactome_Transport_of_vitamins_nucleosides_and_related_molecules_Main_Pathway	NA	NA	NA	NA	NA	NA	NA	NA	NA	NA	NA	NA	NA
NA	reactome_Triglyceride_Biosynthesis_Main_Pathway	NA	NA	NA	NA	NA	NA	NA	NA	NA	NA	NA	NA	NA
NA	reactome_Tristetraprolin_TTP_destabilizes_mRNA_Main_Pathway	NA	NA	NA	NA	NA	NA	NA	NA	NA	NA	NA	NA	NA
NA	reactome_TRP_channels_Main_Pathway	NA	NA	NA	NA	NA	NA	NA	NA	NA	NA	NA	NA	NA
NA	reactome_Tryptophan_catabolism_Main_Pathway	NA	NA	NA	NA	NA	NA	NA	NA	NA	NA	NA	NA	NA
NA	reactome_TWIK_related_potassium_channel_TREK__Main_Pathway	NA	NA	NA	NA	NA	NA	NA	NA	NA	NA	NA	NA	NA
NA	reactome_U12_Dependent_Splicing_Main_Pathway	NA	NA	NA	NA	NA	NA	NA	NA	NA	NA	NA	NA	NA
NA	reactome_Ubiquinol_biosynthesis_Main_Pathway	NA	NA	NA	NA	NA	NA	NA	NA	NA	NA	NA	NA	NA
NA	reactome_Unwinding_of_DNA_Main_Pathway	NA	NA	NA	NA	NA	NA	NA	NA	NA	NA	NA	NA	NA
NA	reactome_Urea_cycle_Main_Pathway	NA	NA	NA	NA	NA	NA	NA	NA	NA	NA	NA	NA	NA
NA	reactome_Viral_Messenger_RNA_Synthesis_Main_Pathway	NA	NA	NA	NA	NA	NA	NA	NA	NA	NA	NA	NA	NA
NA	reactome_Vitamin_B2_riboflavin_metabolism_Main_Pathway	NA	NA	NA	NA	NA	NA	NA	NA	NA	NA	NA	NA	NA
NA	reactome_Vitamin_B5_pantothenate_metabolism_Main_Pathway	NA	NA	NA	NA	NA	NA	NA	NA	NA	NA	NA	NA	NA
NA	reactome_Vpr_mediated_nuclear_import_of_PICs_Main_Pathway	NA	NA	NA	NA	NA	NA	NA	NA	NA	NA	NA	NA	NA
NA	reactome_WNT_mediated_activation_of_DVL_Main_Pathway	NA	NA	NA	NA	NA	NA	NA	NA	NA	NA	NA	NA	NA
NA	reactome_WNT5A_dependent_internalization_of_FZD2_FZD5_and_ROR2_Main_Pathway	NA	NA	NA	NA	NA	NA	NA	NA	NA	NA	NA	NA	NA
NA	reactome_WNT5A_dependent_internalization_of_FZD4_Main_Pathway	NA	NA	NA	NA	NA	NA	NA	NA	NA	NA	NA	NA	NA
NA	reactome_XAV939_inhibits_tankyrase_stabilizing_AXIN_Main_Pathway	NA	NA	NA	NA	NA	NA	NA	NA	NA	NA	NA	NA	NA
NA	STAT3_Pathway_G1_to_S_Cell_Cycle_Progression	NA	NA	NA	NA	NA	NA	NA	NA	NA	NA	NA	NA	NA
NA	TNF_Signaling_Pathway	NA	NA	NA	NA	NA	NA	NA	NA	NA	NA	NA	NA	NA
NA	TNF_Signaling_Pathway_Apoptosis	NA	NA	NA	NA	NA	NA	NA	NA	NA	NA	NA	NA	NA
NA	Ubiquitin-Proteasome_Dependent_Proteolysis_Pathway	NA	NA	NA	NA	NA	NA	NA	NA	NA	NA	NA	NA	NA
NA	VEGF_Pathway_Cell_Survival	NA	NA	NA	NA	NA	NA	NA	NA	NA	NA	NA	NA	NA
NA	VEGF_Pathway_Gene_Expression_and_Cell_Proliferation_via_MAPK7	NA	NA	NA	NA	NA	NA	NA	NA	NA	NA	NA	NA	NA
NA	VEGF_Pathway_Prostaglandin_Production	NA	NA	NA	NA	NA	NA	NA	NA	NA	NA	NA	NA	NA
NA	WNT_Pathway_Cell_Survival	NA	NA	NA	NA	NA	NA	NA	NA	NA	NA	NA	NA	NA

## Sheet: GSE59861_6h_GSE55118
X1_sets_GSE55118_middle_vs_young	X1_sets_GSE55118_old_vs_young	X1_sets_GSE59861_6h_2Gy	X1_sets_GSE59861_6h_5cGy	X2_sets_GSE55118_middle_vs_young_GSE55118_old_vs_young	X2_sets_GSE55118_middle_vs_young_GSE59861_6h_2Gy	X2_sets_GSE55118_middle_vs_young_GSE59861_6h_5cGy	X2_sets_GSE55118_old_vs_young_GSE59861_6h_2Gy	X2_sets_GSE55118_old_vs_young_GSE59861_6h_5cGy	X2_sets_GSE59861_6h_2Gy_GSE59861_6h_5cGy	X3_sets_GSE55118_middle_vs_young_GSE55118_old_vs_young_GSE59861_6h_2Gy	X3_sets_GSE55118_middle_vs_young_GSE55118_old_vs_young_GSE59861_6h_5cGy	X3_sets_GSE55118_middle_vs_young_GSE59861_6h_2Gy_GSE59861_6h_5cGy	X3_sets_GSE55118_old_vs_young_GSE59861_6h_2Gy_GSE59861_6h_5cGy	X4_sets_GSE55118_middle_vs_young_GSE55118_old_vs_young_GSE59861_6h_2Gy_GSE59861_6h_5cGy
Estrogen_Pathway_Vasodilatation	NCI_Caspase_Cascade_in_Apoptosis_Pathway_(apoptotic_nuclear_changes)	NCI_FOXA1_transcription_factor_network_Main_Pathway	NCI_Regulation_of_Androgen_receptor_activity_Pathway_(Pathway_positive_regulation_of_transcription_via_GATA2)	PAK_Pathway_Paxillin_Disassembly	NA	NA	NA	NCI_Regulation_of_Androgen_receptor_activity_Pathway_(Pathway_positive_regulation_of_transcription_via_GATA2)	NA	NA	NA	NA	NA	NA
NCI_Arf6_downstream_Pathway_(actin_filament_bundle_formation)	NCI_Ephrin_A_reverse_signaling_Pathway_(MAPKKK_cascade)	NA	NCI_RhoA_signaling_Pathway_(Pathway_positive_regulation_of_NF_kappaB_transcription_factor_activity_via_RHOA)	NA	NA	NA	NA	NA	NA	NA	NA	NA	NA	NA
NCI_Arf6_downstream_Pathway_(Tumor_Cell_Invasion)	NCI_Ephrin_A_reverse_signaling_Pathway_(neuron_projection_morphogenesis)	NA	reactome_ATF6_alpha_activates_chaperone_genes_Main_Pathway	NA	NA	NA	NA	NA	NA	NA	NA	NA	NA	NA
NCI_LKB1_signaling_events_Pathway_(chromatin_remodeling)	NCI_PLK1_signaling_events_Pathway_(chromosome_segregation)	NA	reactome_ATF6_alpha_activates_chaperones_Main_Pathway	NA	NA	NA	NA	NA	NA	NA	NA	NA	NA	NA
NCI_Signaling_events_mediated_by_Stem_cell_factor_receptor_c_Kit__Pathway_(Pathway_positive_regulation_of_transcription_via_MAPK3)	NCI_PLK1_signaling_events_Pathway_(Golgi_organization)	NA	NA	NA	NA	NA	NA	NA	NA	NA	NA	NA	NA	NA
PAK_Pathway_Paxillin_Disassembly	NCI_PLK1_signaling_events_Pathway_(regulation_of_mitotic_centrosome_separation)	NA	NA	NA	NA	NA	NA	NA	NA	NA	NA	NA	NA	NA
reactome_p53_Dependent_G1_DNA_Damage_Response_Main_Pathway	NCI_PLK1_signaling_events_Pathway_(spindle_elongation)	NA	NA	NA	NA	NA	NA	NA	NA	NA	NA	NA	NA	NA
NA	NCI_PLK1_signaling_events_Pathway_(spindle_stabilization)	NA	NA	NA	NA	NA	NA	NA	NA	NA	NA	NA	NA	NA
NA	NCI_Regulation_of_Androgen_receptor_activity_Pathway_(Pathway_positive_regulation_of_transcription_via_GATA2)	NA	NA	NA	NA	NA	NA	NA	NA	NA	NA	NA	NA	NA
NA	PAK_Pathway_Paxillin_Disassembly	NA	NA	NA	NA	NA	NA	NA	NA	NA	NA	NA	NA	NA
NA	reactome_cell_division_Main_Pathway	NA	NA	NA	NA	NA	NA	NA	NA	NA	NA	NA	NA	NA

## Sheet: GSE59861_12h_EMTAB2086
X1_sets_EMTAB2086_70_vs_30	X1_sets_EMTAB2086_80_vs_30	X1_sets_GSE59861_12h_2Gy	X1_sets_GSE59861_12h_5cGy	X2_sets_EMTAB2086_70_vs_30_EMTAB2086_80_vs_30	X2_sets_EMTAB2086_70_vs_30_GSE59861_12h_2Gy	X2_sets_EMTAB2086_70_vs_30_GSE59861_12h_5cGy	X2_sets_EMTAB2086_80_vs_30_GSE59861_12h_2Gy	X2_sets_EMTAB2086_80_vs_30_GSE59861_12h_5cGy	X2_sets_GSE59861_12h_2Gy_GSE59861_12h_5cGy	X3_sets_EMTAB2086_70_vs_30_EMTAB2086_80_vs_30_GSE59861_12h_2Gy	X3_sets_EMTAB2086_70_vs_30_EMTAB2086_80_vs_30_GSE59861_12h_5cGy	X3_sets_EMTAB2086_70_vs_30_GSE59861_12h_2Gy_GSE59861_12h_5cGy	X3_sets_EMTAB2086_80_vs_30_GSE59861_12h_2Gy_GSE59861_12h_5cGy	X4_sets_EMTAB2086_70_vs_30_EMTAB2086_80_vs_30_GSE59861_12h_2Gy_GSE59861_12h_5cGy
Akt_Signaling_Pathway_Cell_Cycle_Progression	AHR_Pathway_CYP1A1_CYP1B1_CYP1A2_AHRR_gene_expression_via_POLR2B	ATM_Pathway_Repair_and_Recombination	EGF_Pathway_Rab5_Regulation_Pathway	Akt_Signaling_Pathway_Regulation_of_Cyclic_Nucleotide	ATM_Pathway_Repair_and_Recombination	EGF_Pathway_Rab5_Regulation_Pathway	ATM_Pathway_Repair_and_Recombination	EGF_Pathway_Rab5_Regulation_Pathway	NCI_Calcineurin_regulated_NFAT_dependent_transcription_in_lymphocytes_Main_Pathway	ATM_Pathway_Repair_and_Recombination	EGF_Pathway_Rab5_Regulation_Pathway	NCI_Regulation_of_Androgen_receptor_activity_Pathway_(Pathway_positive_regulation_of_transcription_via_GATA2)	NCI_Calcineurin_regulated_NFAT_dependent_transcription_in_lymphocytes_Main_Pathway	NCI_Regulation_of_Androgen_receptor_activity_Pathway_(Pathway_positive_regulation_of_transcription_via_GATA2)
Akt_Signaling_Pathway_Regulation_of_Cyclic_Nucleotide	Akt_Signaling_Pathway_Acetylation_of_proteins	Mismatch_Repair_in_Eukaryotes_Pathway	NCI_Calcineurin_regulated_NFAT_dependent_transcription_in_lymphocytes_Main_Pathway	ATM_Pathway_DNA_repair	Mismatch_Repair_in_Eukaryotes_Pathway	NCI_Regulation_of_Androgen_receptor_activity_Pathway_(Pathway_positive_regulation_of_transcription_via_GATA2)	Mismatch_Repair_in_Eukaryotes_Pathway	NCI_Calcineurin_regulated_NFAT_dependent_transcription_in_lymphocytes_Main_Pathway	NCI_Calcineurin_regulated_NFAT_dependent_transcription_in_lymphocytes_Pathway_(T_cell_anergy)	Mismatch_Repair_in_Eukaryotes_Pathway	NCI_Regulation_of_Androgen_receptor_activity_Pathway_(Pathway_positive_regulation_of_transcription_via_GATA2)	NA	NCI_Regulation_of_Androgen_receptor_activity_Pathway_(Pathway_positive_regulation_of_transcription_via_GATA2)	NA
ATM_Pathway_DNA_repair	Akt_Signaling_Pathway_AR_mediated_apoptosis	NCI_Calcineurin_regulated_NFAT_dependent_transcription_in_lymphocytes_Main_Pathway	NCI_Calcineurin_regulated_NFAT_dependent_transcription_in_lymphocytes_Pathway_(T_cell_anergy)	ATM_Pathway_Repair_and_Recombination	NCI_Regulation_of_Androgen_receptor_activity_Pathway_(Pathway_positive_regulation_of_transcription_via_GATA2)	NA	NCI_Calcineurin_regulated_NFAT_dependent_transcription_in_lymphocytes_Main_Pathway	NCI_Regulation_of_Androgen_receptor_activity_Pathway_(Pathway_positive_regulation_of_transcription_via_GATA2)	NCI_Regulation_of_Androgen_receptor_activity_Pathway_(Pathway_positive_regulation_of_transcription_via_GATA2)	NCI_Regulation_of_Androgen_receptor_activity_Pathway_(Pathway_positive_regulation_of_transcription_via_GATA2)	NA	NA	NA	NA
ATM_Pathway_Repair_and_Recombination	Akt_Signaling_Pathway_Regulation_of_Cyclic_Nucleotide	NCI_Calcineurin_regulated_NFAT_dependent_transcription_in_lymphocytes_Pathway_(T_cell_anergy)	NCI_Regulation_of_Androgen_receptor_activity_Pathway_(Pathway_positive_regulation_of_transcription_via_GATA2)	ATM_Pathway_S-phase_arrest	reactome_Activation_of_the_pre_replicative_complex_Main_Pathway	NA	NCI_Regulation_of_Androgen_receptor_activity_Pathway_(Pathway_positive_regulation_of_transcription_via_GATA2)	NA	reactome_PERK_regulates_gene_expression_Main_Pathway	reactome_Activation_of_the_pre_replicative_complex_Main_Pathway	NA	NA	NA	NA
ATM_Pathway_S-phase_arrest	Akt_Signaling_Pathway_Synaptic_Transmission	NCI_Regulation_of_Androgen_receptor_activity_Pathway_(Pathway_positive_regulation_of_transcription_via_GATA2)	reactome_ATF6_alpha_activates_chaperone_genes_Main_Pathway	BRCA1_Pathway	reactome_Assembly_of_the_RAD51_ssDNA_nucleoprotein_complex_Main_Pathway	NA	NCI_Validated_transcriptional_targets_of_AP1_family_members_Fra1_and_Fra2_Main_Pathway	NA	NA	reactome_Assembly_of_the_RAD51_ssDNA_nucleoprotein_complex_Main_Pathway	NA	NA	NA	NA
BRCA1_Pathway	ATM_Pathway_Apoptosis_and_Senescence	NCI_Signaling_events_mediated_by_focal_adhesion_kinase_Pathway_(regulation_of_cell_cycle)	reactome_ATF6_alpha_activates_chaperones_Main_Pathway	BRCA1_Pathway_Growth_Promoting_Genes_hTert_S100A7	reactome_CDC6_association_with_the_ORC_origin_complex_Main_Pathway	NA	reactome_Activation_of_the_pre_replicative_complex_Main_Pathway	NA	NA	reactome_CDC6_association_with_the_ORC_origin_complex_Main_Pathway	NA	NA	NA	NA
BRCA1_Pathway_Growth_Promoting_Genes_hTert_S100A7	ATM_Pathway_DNA_repair	NCI_Validated_transcriptional_targets_of_AP1_family_members_Fra1_and_Fra2_Main_Pathway	reactome_PERK_regulates_gene_expression_Main_Pathway	BRCA1_Pathway_Homologous_Recombination_Repair	reactome_Presynaptic_phase_of_homologous_DNA_pairing_and_strand_exchange_Main_Pathway	NA	reactome_Assembly_of_the_RAD51_ssDNA_nucleoprotein_complex_Main_Pathway	NA	NA	reactome_Presynaptic_phase_of_homologous_DNA_pairing_and_strand_exchange_Main_Pathway	NA	NA	NA	NA
BRCA1_Pathway_Homologous_Recombination_Repair	ATM_Pathway_Repair_and_Recombination	reactome_Activation_of_the_pre_replicative_complex_Main_Pathway	NA	BRCA1_Pathway_Mismatch_Repair	reactome_Processing_of_DNA_double_strand_break_ends_Main_Pathway	NA	reactome_CDC6_association_with_the_ORC_origin_complex_Main_Pathway	NA	NA	reactome_Processing_of_DNA_double_strand_break_ends_Main_Pathway	NA	NA	NA	NA
BRCA1_Pathway_Mismatch_Repair	ATM_Pathway_S-phase_arrest	reactome_Assembly_of_the_RAD51_ssDNA_nucleoprotein_complex_Main_Pathway	NA	Cellular_Apoptosis_Pathway_Depolarization	reactome_Switching_of_origins_to_a_post_replicative_state_Main_Pathway	NA	reactome_CHL1_interactions_Main_Pathway	NA	NA	reactome_Switching_of_origins_to_a_post_replicative_state_Main_Pathway	NA	NA	NA	NA
Cellular_Apoptosis_Pathway_Depolarization	ATM_Pathway_S-phase_progression	reactome_CDC6_association_with_the_ORC_origin_complex_Main_Pathway	NA	Cellular_Apoptosis_Pathway_Gene_Expression_BAX_BID_BAK_Ras_Noxa_PUMA_APAF1_Survivin_BCL2_via_TP53	reactome_Unwinding_of_DNA_Main_Pathway	NA	reactome_Cyclin_E_associated_events_during_G1_S_transition_Main_Pathway	NA	NA	reactome_Unwinding_of_DNA_Main_Pathway	NA	NA	NA	NA
Cellular_Apoptosis_Pathway_Gene_Expression_BAX_BID_BAK_Ras_Noxa_PUMA_APAF1_Survivin_BCL2_via_TP53	BRCA1_Pathway	reactome_CHL1_interactions_Main_Pathway	NA	EGF_Pathway_Rab5_Regulation_Pathway	NA	NA	reactome_Presynaptic_phase_of_homologous_DNA_pairing_and_strand_exchange_Main_Pathway	NA	NA	NA	NA	NA	NA	NA
EGF_Pathway_Rab5_Regulation_Pathway	BRCA1_Pathway_Base_Excission_Repair	reactome_Cyclin_E_associated_events_during_G1_S_transition_Main_Pathway	NA	IL-2_Pathway_Apoptosis	NA	NA	reactome_Processing_of_DNA_double_strand_break_ends_Main_Pathway	NA	NA	NA	NA	NA	NA	NA
IL-2_Pathway_Apoptosis	BRCA1_Pathway_Cell_Cycle_Arrest_DNA_Repair_Genes_p21_WAF_CIP1_14-3-3_GADD45	reactome_Inflammasomes_Main_Pathway	NA	Interferon_Pathway_Gene_Expression_via_HIST1H3B_CREB3	NA	NA	reactome_Switching_of_origins_to_a_post_replicative_state_Main_Pathway	NA	NA	NA	NA	NA	NA	NA
Interferon_Pathway_Gene_Expression_via_HIST1H3B_CREB3	BRCA1_Pathway_Chromatin_Remodeling	reactome_PERK_regulates_gene_expression_Main_Pathway	NA	IP3_Pathway_Gene_Expression_via_CREB3_NFATC2_MEF2D	NA	NA	reactome_Unwinding_of_DNA_Main_Pathway	NA	NA	NA	NA	NA	NA	NA
IP3_Pathway_Gene_Expression_via_CREB3_NFATC2_MEF2D	BRCA1_Pathway_E2_Responsive_Genes	reactome_Presynaptic_phase_of_homologous_DNA_pairing_and_strand_exchange_Main_Pathway	NA	KEGG_Basal_cell_carcinoma_Main_Pathway	NA	NA	NA	NA	NA	NA	NA	NA	NA	NA
KEGG_Basal_cell_carcinoma_Main_Pathway	BRCA1_Pathway_G1_S_arrest	reactome_Processing_of_DNA_double_strand_break_ends_Main_Pathway	NA	KEGG_Base_excision_repair_Main_Pathway	NA	NA	NA	NA	NA	NA	NA	NA	NA	NA
KEGG_Base_excision_repair_Main_Pathway	BRCA1_Pathway_Growth_Promoting_Genes_hTert_S100A7	reactome_Switching_of_origins_to_a_post_replicative_state_Main_Pathway	NA	KEGG_Bile_secretion_Main_Pathway	NA	NA	NA	NA	NA	NA	NA	NA	NA	NA
KEGG_Bile_secretion_Main_Pathway	BRCA1_Pathway_Homologous_Recombination_Repair	reactome_Unwinding_of_DNA_Main_Pathway	NA	KEGG_DNA_replication_Main_Pathway	NA	NA	NA	NA	NA	NA	NA	NA	NA	NA
KEGG_DNA_replication_Main_Pathway	BRCA1_Pathway_Mismatch_Repair	NA	NA	KEGG_Fanconi_anemia_Main_Pathway	NA	NA	NA	NA	NA	NA	NA	NA	NA	NA
KEGG_Fanconi_anemia_Main_Pathway	BRCA1_Pathway_NHEJ_DSB_Repair	NA	NA	KEGG_Fatty_acid_biosynthesis_Main_Pathway	NA	NA	NA	NA	NA	NA	NA	NA	NA	NA
KEGG_Fatty_acid_biosynthesis_Main_Pathway	BRCA1_Pathway_Nucleotide_Excission_Repair	NA	NA	KEGG_Hedgehog_signaling_Main_Pathway	NA	NA	NA	NA	NA	NA	NA	NA	NA	NA
KEGG_Hedgehog_signaling_Main_Pathway	BRCA1_Pathway_Transciption_Coupled_Repair	NA	NA	KEGG_Homologous_recombination_Main_Pathway	NA	NA	NA	NA	NA	NA	NA	NA	NA	NA
KEGG_Homologous_recombination_Main_Pathway	Caspase_Cascade_Pathway	NA	NA	KEGG_Lipoic_acid_metabolism_Main_Pathway	NA	NA	NA	NA	NA	NA	NA	NA	NA	NA
KEGG_Inflammatory_bowel_disease_IBD__Main_Pathway	Caspase_Cascade_Pathway_Activated_Tissue_Trans-glutaminase	NA	NA	KEGG_Mismatch_repair_Main_Pathway	NA	NA	NA	NA	NA	NA	NA	NA	NA	NA
KEGG_Lipoic_acid_metabolism_Main_Pathway	Caspase_Cascade_Pathway_DNA_Fragmentation	NA	NA	KEGG_Non_homologous_end_joining_Main_Pathway	NA	NA	NA	NA	NA	NA	NA	NA	NA	NA
KEGG_Mismatch_repair_Main_Pathway	Cellular_Apoptosis_Pathway_Depolarization	NA	NA	KEGG_Nucleotide_excision_repair_Main_Pathway	NA	NA	NA	NA	NA	NA	NA	NA	NA	NA
KEGG_Non_homologous_end_joining_Main_Pathway	Cellular_Apoptosis_Pathway_Gene_Expression_BAX_BID_BAK_Ras_Noxa_PUMA_APAF1_Survivin_BCL2_via_TP53	NA	NA	KEGG_One_carbon_pool_by_folate_Main_Pathway	NA	NA	NA	NA	NA	NA	NA	NA	NA	NA
KEGG_Nucleotide_excision_repair_Main_Pathway	Chemokine_Pathway_Internalization_Degradation_Recycling	NA	NA	KEGG_Oocyte_meiosis_Main_Pathway	NA	NA	NA	NA	NA	NA	NA	NA	NA	NA
KEGG_One_carbon_pool_by_folate_Main_Pathway	Chromatin_Pathway	NA	NA	KEGG_Phenylalanine_metabolism_Main_Pathway	NA	NA	NA	NA	NA	NA	NA	NA	NA	NA
KEGG_Oocyte_meiosis_Main_Pathway	EGF_Pathway_Cell_Survival	NA	NA	KEGG_Pyrimidine_metabolism_Main_Pathway	NA	NA	NA	NA	NA	NA	NA	NA	NA	NA
KEGG_Phenylalanine_metabolism_Main_Pathway	EGF_Pathway_Rab5_Regulation_Pathway	NA	NA	KEGG_Tryptophan_metabolism_Main_Pathway	NA	NA	NA	NA	NA	NA	NA	NA	NA	NA
KEGG_Pyrimidine_metabolism_Main_Pathway	ErbB_Family_Pathway	NA	NA	KEGG_Ubiquinone_and_other_terpenoid_quinone_biosynthesis_Main_Pathway	NA	NA	NA	NA	NA	NA	NA	NA	NA	NA
KEGG_Sphingolipid_metabolism_Main_Pathway	ErbB_Family_Pathway_Gene_Expression_via_JUN_FOS_ELK1	NA	NA	MAPK_Family_Pathway_Chromatin_Remodelling	NA	NA	NA	NA	NA	NA	NA	NA	NA	NA
KEGG_Tryptophan_metabolism_Main_Pathway	ERK_Signaling_Pathway_Cell_Survival	NA	NA	Mismatch_Repair_in_Eukaryotes_Pathway	NA	NA	NA	NA	NA	NA	NA	NA	NA	NA
KEGG_Ubiquinone_and_other_terpenoid_quinone_biosynthesis_Main_Pathway	ERK_Signaling_Pathway_Gene_Expression_via_CAPN6_TP53_FOS_ATF1_MYC_ELK3_MYLK_ETS1_SRF_HIST1H3B_CREB3_STAT3_NFKB2_HMGN1_ESR2_ELK1_PAX6_JUN	NA	NA	NCI_ATM_Pathway_(chromatin_remodeling)	NA	NA	NA	NA	NA	NA	NA	NA	NA	NA
MAPK_Family_Pathway_Chromatin_Remodelling	ERK_Signaling_Pathway_Translation	NA	NA	NCI_ATM_Pathway_(double_strand_break_repair_via_nonhomologous_end_joining)	NA	NA	NA	NA	NA	NA	NA	NA	NA	NA
Mismatch_Repair_in_Eukaryotes_Pathway	Erythropoietin_Pathway	NA	NA	NCI_ATM_Pathway_(G2_M_transition_checkpoint)	NA	NA	NA	NA	NA	NA	NA	NA	NA	NA
NCI_ATM_Pathway_(chromatin_remodeling)	Erythropoietin_Pathway_Cell_Cycle_Progression	NA	NA	NCI_ATM_Pathway_(Pathway_rRNA_transcription_via_ATM)	NA	NA	NA	NA	NA	NA	NA	NA	NA	NA
NCI_ATM_Pathway_(double_strand_break_repair_via_nonhomologous_end_joining)	Erythropoietin_Pathway_Cell_Survival	NA	NA	NCI_ATR_signaling_Main_Pathway	NA	NA	NA	NA	NA	NA	NA	NA	NA	NA
NCI_ATM_Pathway_(G2_M_transition_checkpoint)	Estrogen_Pathway_Gene_Expression_via_FOS_JUN_ELK1_SP1_POLR2B_CREB3_NFKB2	NA	NA	NCI_ATR_signaling_Pathway_(Pathway_negative_regulation_of_transcription_during_mitosis_via_CHEK1)	NA	NA	NA	NA	NA	NA	NA	NA	NA	NA
NCI_ATM_Pathway_(Pathway_rRNA_transcription_via_ATM)	FLT3_Signaling_Pathway	NA	NA	NCI_ATR_signaling_Pathway_(regulation_of_double_strand_break_repair_via_homologous_recombination)	NA	NA	NA	NA	NA	NA	NA	NA	NA	NA
NCI_ATR_signaling_Main_Pathway	FLT3_Signaling_Pathway_Transcription_via_ELK3_MAPK12_CREB3_STAT2	NA	NA	NCI_ATR_signaling_Pathway_(response_to_G2_M_transition_DNA_damage_checkpoint_signal)	NA	NA	NA	NA	NA	NA	NA	NA	NA	NA
NCI_ATR_signaling_Pathway_(Pathway_negative_regulation_of_transcription_during_mitosis_via_CHEK1)	Glucocorticoid_Receptor_Signaling_Pathway	NA	NA	NCI_Atypical_NF_kappaB_Pathway_(Pathway_degradation_of_NFKB1_NFKBIA)	NA	NA	NA	NA	NA	NA	NA	NA	NA	NA
NCI_ATR_signaling_Pathway_(regulation_of_double_strand_break_repair_via_homologous_recombination)	Glucocorticoid_Receptor_Signaling_Pathway_Cell_Cycle_Progression	NA	NA	NCI_Atypical_NF_kappaB_Pathway_(Pathway_degradation_of_NFKBIA)	NA	NA	NA	NA	NA	NA	NA	NA	NA	NA
NCI_ATR_signaling_Pathway_(response_to_G2_M_transition_DNA_damage_checkpoint_signal)	Glucocorticoid_Receptor_Signaling_Pathway_Gene_Expression_via_CREB3_STAT5B_SLC22A2_POU2F1	NA	NA	NCI_Atypical_NF_kappaB_Pathway_(positive_regulation_of_anti_apoptosis)	NA	NA	NA	NA	NA	NA	NA	NA	NA	NA
NCI_Atypical_NF_kappaB_Pathway_(Pathway_degradation_of_NFKB1_NFKBIA)	Glucocorticoid_Receptor_Signaling_Pathway_Histone_Deacetylation	NA	NA	NCI_Aurora_A_signaling_Pathway_(regulation_of_centrosome_cycle)	NA	NA	NA	NA	NA	NA	NA	NA	NA	NA
NCI_Atypical_NF_kappaB_Pathway_(Pathway_degradation_of_NFKBIA)	Glucocorticoid_Receptor_Signaling_Pathway_Inflammatory_Cytokines	NA	NA	NCI_Aurora_B_signaling_Main_Pathway	NA	NA	NA	NA	NA	NA	NA	NA	NA	NA
NCI_Atypical_NF_kappaB_Pathway_(positive_regulation_of_anti_apoptosis)	GPCR_Pathway	NA	NA	NCI_Aurora_B_signaling_Pathway_(cytokinesis)	NA	NA	NA	NA	NA	NA	NA	NA	NA	NA
NCI_Aurora_A_signaling_Pathway_(regulation_of_centrosome_cycle)	GPCR_Pathway_Gene_Expression_via_JUN_NFKB2_ELK1_SRF_FOS_CREB3	NA	NA	NCI_Aurora_C_signaling_Main_Pathway	NA	NA	NA	NA	NA	NA	NA	NA	NA	NA
NCI_Aurora_B_signaling_Main_Pathway	GSK3_Signaling_Pathway	NA	NA	NCI_BARD1_signaling_events_Main_Pathway	NA	NA	NA	NA	NA	NA	NA	NA	NA	NA
NCI_Aurora_B_signaling_Pathway_(cytokinesis)	GSK3_Signaling_Pathway_Glycogen_Synthesis	NA	NA	NCI_BARD1_signaling_events_Pathway_(DNA_damage_checkpoint)	NA	NA	NA	NA	NA	NA	NA	NA	NA	NA
NCI_Aurora_C_signaling_Main_Pathway	HGF_Pathway	NA	NA	NCI_BARD1_signaling_events_Pathway_(DNA_repair)	NA	NA	NA	NA	NA	NA	NA	NA	NA	NA
NCI_BARD1_signaling_events_Main_Pathway	HGF_Pathway_IP3_Pathway	NA	NA	NCI_BARD1_signaling_events_Pathway_(protein_ubiquitination)	NA	NA	NA	NA	NA	NA	NA	NA	NA	NA
NCI_BARD1_signaling_events_Pathway_(DNA_damage_checkpoint)	HIF1Alpha_Pathway	NA	NA	NCI_Caspase_Cascade_in_Apoptosis_Pathway_(actin_filament_polymerization)	NA	NA	NA	NA	NA	NA	NA	NA	NA	NA
NCI_BARD1_signaling_events_Pathway_(DNA_repair)	HIF1Alpha_Pathway_p53_Hypoxia_Pathway	NA	NA	NCI_Caspase_Cascade_in_Apoptosis_Pathway_(DNA_repair)	NA	NA	NA	NA	NA	NA	NA	NA	NA	NA
NCI_BARD1_signaling_events_Pathway_(protein_ubiquitination)	IGF1R_Signaling_Pathway_Apoptosis	NA	NA	NCI_Caspase_Cascade_in_Apoptosis_Pathway_(positive_regulation_of_apoptosis)	NA	NA	NA	NA	NA	NA	NA	NA	NA	NA
NCI_Caspase_Cascade_in_Apoptosis_Pathway_(actin_filament_polymerization)	IGF1R_Signaling_Pathway_Cell_Proliferation_Diferentiation_and_Apoptosis	NA	NA	NCI_Circadian_rhythm_Main_Pathway	NA	NA	NA	NA	NA	NA	NA	NA	NA	NA
NCI_Caspase_Cascade_in_Apoptosis_Pathway_(DNA_repair)	IGF1R_Signaling_Pathway_Gene_Expression_Proliferation_Growth_Survival_via_NFAT5_CREB3	NA	NA	NCI_Circadian_rhythm_Pathway_(chromatin_modification)	NA	NA	NA	NA	NA	NA	NA	NA	NA	NA
NCI_Caspase_Cascade_in_Apoptosis_Pathway_(positive_regulation_of_apoptosis)	IL-10_Pathway	NA	NA	NCI_Circadian_rhythm_Pathway_(S_phase_of_mitotic_cell_cycle)	NA	NA	NA	NA	NA	NA	NA	NA	NA	NA
NCI_Circadian_rhythm_Main_Pathway	IL-10_Pathway_IL-10_Responsive_Genes_Transcription_of_BCLXL_Cyclin-D1_D2_D3_Pim1_c-Myc_and_P19(INK4D)_via_STAT3	NA	NA	NCI_Class_IB_PI3K_non_lipid_kinase_events_Pathway_(cAMP_biosynthetic_process)	NA	NA	NA	NA	NA	NA	NA	NA	NA	NA
NCI_Circadian_rhythm_Pathway_(chromatin_modification)	IL-10_Pathway_Inflammatory_Cytokine_Genes_Expression_via_STAT3	NA	NA	NCI_DNA_PK_pathway_in_nonhomologous_end_joining_Main_Pathway	NA	NA	NA	NA	NA	NA	NA	NA	NA	NA
NCI_Circadian_rhythm_Pathway_(S_phase_of_mitotic_cell_cycle)	IL-10_Pathway_Translational_Modulation	NA	NA	NCI_DNA_PK_pathway_in_nonhomologous_end_joining_Pathway_(double_strand_break_repair_via_homologous_recombination)	NA	NA	NA	NA	NA	NA	NA	NA	NA	NA
NCI_Class_IB_PI3K_non_lipid_kinase_events_Pathway_(cAMP_biosynthetic_process)	IL-2_Pathway_Apoptosis	NA	NA	NCI_DNA_PK_pathway_in_nonhomologous_end_joining_Pathway_(double_strand_break_repair_via_nonhomologous_end_joining)	NA	NA	NA	NA	NA	NA	NA	NA	NA	NA
NCI_DNA_PK_pathway_in_nonhomologous_end_joining_Main_Pathway	IL-2_Pathway_IL2_Gene_Expression_via_POLR1E_EGR1_HMGA1_ELF1_POU2F1_MYC	NA	NA	NCI_DNA_PK_pathway_in_nonhomologous_end_joining_Pathway_(immunoglobulin_heavy_chain_V_D_J_recombination)	NA	NA	NA	NA	NA	NA	NA	NA	NA	NA
NCI_DNA_PK_pathway_in_nonhomologous_end_joining_Pathway_(double_strand_break_repair_via_homologous_recombination)	ILK_Signaling_Pathway_Epithelial_Mesenchymal_Transition	NA	NA	NCI_DNA_PK_pathway_in_nonhomologous_end_joining_Pathway_(immunoglobulin_light_chain_V_J_recombination)	NA	NA	NA	NA	NA	NA	NA	NA	NA	NA
NCI_DNA_PK_pathway_in_nonhomologous_end_joining_Pathway_(double_strand_break_repair_via_nonhomologous_end_joining)	Interferon_Pathway	NA	NA	NCI_DNA_PK_pathway_in_nonhomologous_end_joining_Pathway_(V_D_J_recombination)	NA	NA	NA	NA	NA	NA	NA	NA	NA	NA
NCI_DNA_PK_pathway_in_nonhomologous_end_joining_Pathway_(immunoglobulin_heavy_chain_V_D_J_recombination)	Interferon_Pathway_Gene_Expression_via_HIST1H3B_CREB3	NA	NA	NCI_Endogenous_TLR_signaling_Pathway_(regulation_of_cell_adhesion)	NA	NA	NA	NA	NA	NA	NA	NA	NA	NA
NCI_DNA_PK_pathway_in_nonhomologous_end_joining_Pathway_(immunoglobulin_light_chain_V_J_recombination)	Interferon_Pathway_Translation	NA	NA	NCI_Fanconi_anemia_Main_Pathway	NA	NA	NA	NA	NA	NA	NA	NA	NA	NA
NCI_DNA_PK_pathway_in_nonhomologous_end_joining_Pathway_(V_D_J_recombination)	IP3_Pathway_Gene_Expression_via_CREB3_NFATC2_MEF2D	NA	NA	NCI_Fanconi_anemia_Pathway_(DNA_repair)	NA	NA	NA	NA	NA	NA	NA	NA	NA	NA
NCI_Effects_of_Botulinum_toxin_Main_Pathway	JAK-STAT_Pathway	NA	NA	NCI_Fanconi_anemia_Pathway_(G1_S_transition_checkpoint)	NA	NA	NA	NA	NA	NA	NA	NA	NA	NA
NCI_Endogenous_TLR_signaling_Pathway_(regulation_of_cell_adhesion)	KEGG_ABC_transporters_Main_Pathway	NA	NA	NCI_Fanconi_anemia_Pathway_(regulation_of_double_strand_break_repair_via_homologous_recombination)	NA	NA	NA	NA	NA	NA	NA	NA	NA	NA
NCI_Fanconi_anemia_Main_Pathway	KEGG_Alanine_aspartate_and_glutamate_metabolism_Main_Pathway	NA	NA	NCI_Fanconi_anemia_Pathway_(Sister_Chromatid_Exchange_Process)	NA	NA	NA	NA	NA	NA	NA	NA	NA	NA
NCI_Fanconi_anemia_Pathway_(DNA_repair)	KEGG_Aldosterone_regulated_sodium_reabsorption_Main_Pathway	NA	NA	NCI_FOXM1_transcription_factor_network_Main_Pathway	NA	NA	NA	NA	NA	NA	NA	NA	NA	NA
NCI_Fanconi_anemia_Pathway_(G1_S_transition_checkpoint)	KEGG_Amphetamine_addiction_Main_Pathway	NA	NA	NCI_Glypican_2_network_Main_Pathway	NA	NA	NA	NA	NA	NA	NA	NA	NA	NA
NCI_Fanconi_anemia_Pathway_(regulation_of_double_strand_break_repair_via_homologous_recombination)	KEGG_Apoptosis_Main_Pathway	NA	NA	NCI_Integrin_linked_kinase_signaling_Pathway_(centrosome_localization)	NA	NA	NA	NA	NA	NA	NA	NA	NA	NA
NCI_Fanconi_anemia_Pathway_(Sister_Chromatid_Exchange_Process)	KEGG_Ascorbate_and_aldarate_metabolism_Main_Pathway	NA	NA	NCI_PDGF_receptor_signaling_network_Main_Pathway	NA	NA	NA	NA	NA	NA	NA	NA	NA	NA
NCI_FGF_signaling_Pathway_(MAPKKK_cascade)	KEGG_Axon_guidance_Main_Pathway	NA	NA	NCI_PDGF_receptor_signaling_network_Pathway_(platelet_derived_growth_factor_receptor_signaling_pathway)	NA	NA	NA	NA	NA	NA	NA	NA	NA	NA
NCI_FOXM1_transcription_factor_network_Main_Pathway	KEGG_Basal_cell_carcinoma_Main_Pathway	NA	NA	NCI_PLK1_signaling_events_Main_Pathway	NA	NA	NA	NA	NA	NA	NA	NA	NA	NA
NCI_Glypican_2_network_Main_Pathway	KEGG_Basal_transcription_factors_Main_Pathway	NA	NA	NCI_PLK1_signaling_events_Pathway_(chromosome_segregation)	NA	NA	NA	NA	NA	NA	NA	NA	NA	NA
NCI_Integrin_linked_kinase_signaling_Pathway_(centrosome_localization)	KEGG_Base_excision_repair_Main_Pathway	NA	NA	NCI_PLK1_signaling_events_Pathway_(G2_M_transition_of_mitotic_cell_cycle)	NA	NA	NA	NA	NA	NA	NA	NA	NA	NA
NCI_PDGF_receptor_signaling_network_Main_Pathway	KEGG_beta_Alanine_metabolism_Main_Pathway	NA	NA	NCI_PLK1_signaling_events_Pathway_(Golgi_organization)	NA	NA	NA	NA	NA	NA	NA	NA	NA	NA
NCI_PDGF_receptor_signaling_network_Pathway_(platelet_derived_growth_factor_receptor_signaling_pathway)	KEGG_Bile_secretion_Main_Pathway	NA	NA	NCI_PLK1_signaling_events_Pathway_(metaphase_plate_congression)	NA	NA	NA	NA	NA	NA	NA	NA	NA	NA
NCI_PLK1_signaling_events_Main_Pathway	KEGG_Biosynthesis_of_unsaturated_fatty_acids_Main_Pathway	NA	NA	NCI_PLK1_signaling_events_Pathway_(microtubule_cytoskeleton_organization)	NA	NA	NA	NA	NA	NA	NA	NA	NA	NA
NCI_PLK1_signaling_events_Pathway_(chromosome_segregation)	KEGG_Calcium_signaling_Main_Pathway	NA	NA	NCI_PLK1_signaling_events_Pathway_(positive_regulation_of_microtubule_depolymerization)	NA	NA	NA	NA	NA	NA	NA	NA	NA	NA
NCI_PLK1_signaling_events_Pathway_(G2_M_transition_of_mitotic_cell_cycle)	KEGG_cAMP_signaling_Main_Pathway	NA	NA	NCI_PLK1_signaling_events_Pathway_(proteasomal_ubiquitin_dependent_protein_catabolic_process)	NA	NA	NA	NA	NA	NA	NA	NA	NA	NA
NCI_PLK1_signaling_events_Pathway_(Golgi_organization)	KEGG_Cardiac_muscle_contraction_Main_Pathway	NA	NA	NCI_PLK1_signaling_events_Pathway_(regulation_of_attachment_of_spindle_microtubules_to_kinetochore)	NA	NA	NA	NA	NA	NA	NA	NA	NA	NA
NCI_PLK1_signaling_events_Pathway_(metaphase_plate_congression)	KEGG_Chagas_disease_American_trypanosomiasis__Main_Pathway	NA	NA	NCI_PLK1_signaling_events_Pathway_(regulation_of_centriole_centriole_cohesion)	NA	NA	NA	NA	NA	NA	NA	NA	NA	NA
NCI_PLK1_signaling_events_Pathway_(microtubule_cytoskeleton_organization)	KEGG_Chemical_carcinogenesis_Main_Pathway	NA	NA	NCI_PLK1_signaling_events_Pathway_(regulation_of_mitotic_centrosome_separation)	NA	NA	NA	NA	NA	NA	NA	NA	NA	NA
NCI_PLK1_signaling_events_Pathway_(positive_regulation_of_microtubule_depolymerization)	KEGG_Choline_metabolism_in_cancer_Main_Pathway	NA	NA	NCI_PLK1_signaling_events_Pathway_(spindle_assembly)	NA	NA	NA	NA	NA	NA	NA	NA	NA	NA
NCI_PLK1_signaling_events_Pathway_(proteasomal_ubiquitin_dependent_protein_catabolic_process)	KEGG_Cyanoamino_acid_metabolism_Main_Pathway	NA	NA	NCI_PLK1_signaling_events_Pathway_(spindle_elongation)	NA	NA	NA	NA	NA	NA	NA	NA	NA	NA
NCI_PLK1_signaling_events_Pathway_(regulation_of_attachment_of_spindle_microtubules_to_kinetochore)	KEGG_Cysteine_and_methionine_metabolism_Main_Pathway	NA	NA	NCI_PLK1_signaling_events_Pathway_(spindle_stabilization)	NA	NA	NA	NA	NA	NA	NA	NA	NA	NA
NCI_PLK1_signaling_events_Pathway_(regulation_of_centriole_centriole_cohesion)	KEGG_Dilated_cardiomyopathy_Main_Pathway	NA	NA	NCI_PLK2_and_PLK4_events_Main_Pathway	NA	NA	NA	NA	NA	NA	NA	NA	NA	NA
NCI_PLK1_signaling_events_Pathway_(regulation_of_mitotic_centrosome_separation)	KEGG_DNA_replication_Main_Pathway	NA	NA	NCI_PLK2_and_PLK4_events_Pathway_(regulation_of_centriole_replication)	NA	NA	NA	NA	NA	NA	NA	NA	NA	NA
NCI_PLK1_signaling_events_Pathway_(spindle_assembly)	KEGG_Drug_metabolism_other_enzymes_Main_Pathway	NA	NA	NCI_RAC1_signaling_Pathway_(neuron_projection_development)	NA	NA	NA	NA	NA	NA	NA	NA	NA	NA
NCI_PLK1_signaling_events_Pathway_(spindle_elongation)	KEGG_Ether_lipid_metabolism_Main_Pathway	NA	NA	NCI_Reelin_signaling_Main_Pathway	NA	NA	NA	NA	NA	NA	NA	NA	NA	NA
NCI_PLK1_signaling_events_Pathway_(spindle_stabilization)	KEGG_Fanconi_anemia_Main_Pathway	NA	NA	NCI_Reelin_signaling_Pathway_(long_term_memory)	NA	NA	NA	NA	NA	NA	NA	NA	NA	NA
NCI_PLK2_and_PLK4_events_Main_Pathway	KEGG_Fatty_acid_biosynthesis_Main_Pathway	NA	NA	NCI_Reelin_signaling_Pathway_(neuron_migration)	NA	NA	NA	NA	NA	NA	NA	NA	NA	NA
NCI_PLK2_and_PLK4_events_Pathway_(regulation_of_centriole_replication)	KEGG_Fatty_acid_degradation_Main_Pathway	NA	NA	NCI_Regulation_of_Androgen_receptor_activity_Pathway_(Pathway_positive_regulation_of_transcription_via_GATA2)	NA	NA	NA	NA	NA	NA	NA	NA	NA	NA
NCI_RAC1_signaling_Pathway_(neuron_projection_development)	KEGG_Focal_adhesion_Main_Pathway	NA	NA	NCI_Regulation_of_retinoblastoma_protein_Main_Pathway	NA	NA	NA	NA	NA	NA	NA	NA	NA	NA
NCI_Reelin_signaling_Main_Pathway	KEGG_Fructose_and_mannose_metabolism_Main_Pathway	NA	NA	NCI_Regulation_of_retinoblastoma_protein_Pathway_(histone_methylation)	NA	NA	NA	NA	NA	NA	NA	NA	NA	NA
NCI_Reelin_signaling_Pathway_(long_term_memory)	KEGG_Galactose_metabolism_Main_Pathway	NA	NA	NCI_RhoA_signaling_Pathway_(Golgi_organization)	NA	NA	NA	NA	NA	NA	NA	NA	NA	NA
NCI_Reelin_signaling_Pathway_(neuron_migration)	KEGG_Gastric_acid_secretion_Main_Pathway	NA	NA	NCI_Signaling_events_mediated_by_HDAC_Class_I_Main_Pathway	NA	NA	NA	NA	NA	NA	NA	NA	NA	NA
NCI_Regulation_of_Androgen_receptor_activity_Pathway_(Pathway_positive_regulation_of_transcription_via_GATA2)	KEGG_Glycerolipid_metabolism_Main_Pathway	NA	NA	NCI_Signaling_events_mediated_by_HDAC_Class_I_Pathway_(histone_deacetylation)	NA	NA	NA	NA	NA	NA	NA	NA	NA	NA
NCI_Regulation_of_retinoblastoma_protein_Main_Pathway	KEGG_Glycerophospholipid_metabolism_Main_Pathway	NA	NA	NCI_Signaling_events_mediated_by_the_Hedgehog_family_Pathway_(determination_of_left_right_symmetry)	NA	NA	NA	NA	NA	NA	NA	NA	NA	NA
NCI_Regulation_of_retinoblastoma_protein_Pathway_(histone_methylation)	KEGG_Glycine_serine_and_threonine_metabolism_Main_Pathway	NA	NA	NCI_Signaling_events_mediated_by_the_Hedgehog_family_Pathway_(heart_development)	NA	NA	NA	NA	NA	NA	NA	NA	NA	NA
NCI_RhoA_signaling_Pathway_(Golgi_organization)	KEGG_Glycosphingolipid_biosynthesis_globo_series_Main_Pathway	NA	NA	NCI_Signaling_events_mediated_by_the_Hedgehog_family_Pathway_(heart_looping)	NA	NA	NA	NA	NA	NA	NA	NA	NA	NA
NCI_Signaling_events_mediated_by_HDAC_Class_I_Main_Pathway	KEGG_Glycosphingolipid_biosynthesis_lacto_and_neolacto_series_Main_Pathway	NA	NA	NCI_Signaling_events_mediated_by_the_Hedgehog_family_Pathway_(somite_specification)	NA	NA	NA	NA	NA	NA	NA	NA	NA	NA
NCI_Signaling_events_mediated_by_HDAC_Class_I_Pathway_(histone_deacetylation)	KEGG_Hedgehog_signaling_Main_Pathway	NA	NA	NCI_Signaling_events_mediated_by_VEGFR1_and_VEGFR2_Pathway_(Pathway_degradation_of_AKAP1)	NA	NA	NA	NA	NA	NA	NA	NA	NA	NA
NCI_Signaling_events_mediated_by_the_Hedgehog_family_Pathway_(determination_of_left_right_symmetry)	KEGG_Homologous_recombination_Main_Pathway	NA	NA	NCI_Signaling_mediated_by_p38_gamma_and_p38_delta_Pathway_(G2_M_transition_checkpoint)	NA	NA	NA	NA	NA	NA	NA	NA	NA	NA
NCI_Signaling_events_mediated_by_the_Hedgehog_family_Pathway_(heart_development)	KEGG_HTLV_I_infection_Main_Pathway	NA	NA	NCI_Syndecan_4_mediated_signaling_events_Main_Pathway	NA	NA	NA	NA	NA	NA	NA	NA	NA	NA
NCI_Signaling_events_mediated_by_the_Hedgehog_family_Pathway_(heart_looping)	KEGG_Hypertrophic_cardiomyopathy_HCM__Main_Pathway	NA	NA	NCI_Trk_receptor_signaling_mediated_by_PI3K_and_PLC_gamma_Pathway_(regulation_of_long_term_neuronal_synaptic_plasticity)	NA	NA	NA	NA	NA	NA	NA	NA	NA	NA
NCI_Signaling_events_mediated_by_the_Hedgehog_family_Pathway_(somite_specification)	KEGG_Leukocyte_transendothelial_migration_Main_Pathway	NA	NA	PTEN_Pathway_DNA_Repair	NA	NA	NA	NA	NA	NA	NA	NA	NA	NA
NCI_Signaling_events_mediated_by_VEGFR1_and_VEGFR2_Pathway_(Pathway_degradation_of_AKAP1)	KEGG_Lipoic_acid_metabolism_Main_Pathway	NA	NA	Ras_Pathway_Receptor_Endocytosis	NA	NA	NA	NA	NA	NA	NA	NA	NA	NA
NCI_Signaling_mediated_by_p38_gamma_and_p38_delta_Pathway_(G2_M_transition_checkpoint)	KEGG_Lysine_biosynthesis_Main_Pathway	NA	NA	reactome_Abnormal_metabolism_in_phenylketonuria_Main_Pathway	NA	NA	NA	NA	NA	NA	NA	NA	NA	NA
NCI_Syndecan_4_mediated_signaling_events_Main_Pathway	KEGG_Melanoma_Main_Pathway	NA	NA	reactome_Activation_of_ATR_in_response_to_replication_stress_Main_Pathway	NA	NA	NA	NA	NA	NA	NA	NA	NA	NA
NCI_Trk_receptor_signaling_mediated_by_PI3K_and_PLC_gamma_Pathway_(regulation_of_long_term_neuronal_synaptic_plasticity)	KEGG_Metabolism_of_xenobiotics_by_cytochrome_P450_Main_Pathway	NA	NA	reactome_Activation_of_DNA_fragmentation_factor_Main_Pathway	NA	NA	NA	NA	NA	NA	NA	NA	NA	NA
PTEN_Pathway_DNA_Repair	KEGG_Mismatch_repair_Main_Pathway	NA	NA	reactome_Activation_of_NIMA_Kinases_NEK9_NEK6_NEK7_Main_Pathway	NA	NA	NA	NA	NA	NA	NA	NA	NA	NA
Ras_Pathway_Receptor_Endocytosis	KEGG_mRNA_surveillance_Main_Pathway	NA	NA	reactome_Activation_of_NOXA_and_translocation_to_mitochondria_Main_Pathway	NA	NA	NA	NA	NA	NA	NA	NA	NA	NA
reactome_Abnormal_metabolism_in_phenylketonuria_Main_Pathway	KEGG_Mucin_type_O_Glycan_biosynthesis_Main_Pathway	NA	NA	reactome_Activation_of_PUMA_and_translocation_to_mitochondria_Main_Pathway	NA	NA	NA	NA	NA	NA	NA	NA	NA	NA
reactome_Activation_of_ATR_in_response_to_replication_stress_Main_Pathway	KEGG_Nitrogen_metabolism_Main_Pathway	NA	NA	reactome_Activation_of_the_pre_replicative_complex_Main_Pathway	NA	NA	NA	NA	NA	NA	NA	NA	NA	NA
reactome_Activation_of_DNA_fragmentation_factor_Main_Pathway	KEGG_Non_homologous_end_joining_Main_Pathway	NA	NA	reactome_Amyloids_Main_Pathway	NA	NA	NA	NA	NA	NA	NA	NA	NA	NA
reactome_Activation_of_NIMA_Kinases_NEK9_NEK6_NEK7_Main_Pathway	KEGG_Nucleotide_excision_repair_Main_Pathway	NA	NA	reactome_APC_C_Cdc20_mediated_degradation_of_Cyclin_B_Main_Pathway	NA	NA	NA	NA	NA	NA	NA	NA	NA	NA
reactome_Activation_of_NOXA_and_translocation_to_mitochondria_Main_Pathway	KEGG_One_carbon_pool_by_folate_Main_Pathway	NA	NA	reactome_APC_C_Cdc20_mediated_degradation_of_mitotic_proteins_Main_Pathway	NA	NA	NA	NA	NA	NA	NA	NA	NA	NA
reactome_Activation_of_PUMA_and_translocation_to_mitochondria_Main_Pathway	KEGG_Oocyte_meiosis_Main_Pathway	NA	NA	reactome_APC_Cdc20_mediated_degradation_of_Nek2A_Main_Pathway	NA	NA	NA	NA	NA	NA	NA	NA	NA	NA
reactome_Activation_of_the_pre_replicative_complex_Main_Pathway	KEGG_Osteoclast_differentiation_Main_Pathway	NA	NA	reactome_Apoptotic_cleavage_of_cellular_proteins_Main_Pathway	NA	NA	NA	NA	NA	NA	NA	NA	NA	NA
reactome_Amyloids_Main_Pathway	KEGG_Pantothenate_and_CoA_biosynthesis_Main_Pathway	NA	NA	reactome_Assembly_of_the_RAD51_ssDNA_nucleoprotein_complex_Main_Pathway	NA	NA	NA	NA	NA	NA	NA	NA	NA	NA
reactome_APC_C_Cdc20_mediated_degradation_of_Cyclin_B_Main_Pathway	KEGG_Pentose_and_glucuronate_interconversions_Main_Pathway	NA	NA	reactome_Astrocytic_Glutamate_Glutamine_Uptake_And_Metabolism_Main_Pathway	NA	NA	NA	NA	NA	NA	NA	NA	NA	NA
reactome_APC_C_Cdc20_mediated_degradation_of_mitotic_proteins_Main_Pathway	KEGG_Pentose_phosphate_Main_Pathway	NA	NA	reactome_ATM_mediated_phosphorylation_of_repair_proteins_Main_Pathway	NA	NA	NA	NA	NA	NA	NA	NA	NA	NA
reactome_APC_Cdc20_mediated_degradation_of_Nek2A_Main_Pathway	KEGG_Phenylalanine_metabolism_Main_Pathway	NA	NA	reactome_Autointegration_results_in_viral_DNA_circles_Main_Pathway	NA	NA	NA	NA	NA	NA	NA	NA	NA	NA
reactome_Apoptotic_cleavage_of_cellular_proteins_Main_Pathway	KEGG_Porphyrin_and_chlorophyll_metabolism_Main_Pathway	NA	NA	reactome_Beta_oxidation_of_butanoyl_CoA_to_acetyl_CoA_Main_Pathway	NA	NA	NA	NA	NA	NA	NA	NA	NA	NA
reactome_Assembly_of_the_RAD51_ssDNA_nucleoprotein_complex_Main_Pathway	KEGG_Progesterone_mediated_oocyte_maturation_Main_Pathway	NA	NA	reactome_CaMK_IV_mediated_phosphorylation_of_CREB_Main_Pathway	NA	NA	NA	NA	NA	NA	NA	NA	NA	NA
reactome_Astrocytic_Glutamate_Glutamine_Uptake_And_Metabolism_Main_Pathway	KEGG_Prostate_cancer_Main_Pathway	NA	NA	reactome_Carnitine_synthesis_Main_Pathway	NA	NA	NA	NA	NA	NA	NA	NA	NA	NA
reactome_ATM_mediated_phosphorylation_of_repair_proteins_Main_Pathway	KEGG_Purine_metabolism_Main_Pathway	NA	NA	reactome_CDC6_association_with_the_ORC_origin_complex_Main_Pathway	NA	NA	NA	NA	NA	NA	NA	NA	NA	NA
reactome_Autointegration_results_in_viral_DNA_circles_Main_Pathway	KEGG_Pyrimidine_metabolism_Main_Pathway	NA	NA	reactome_cell_division_Main_Pathway	NA	NA	NA	NA	NA	NA	NA	NA	NA	NA
reactome_Beta_oxidation_of_butanoyl_CoA_to_acetyl_CoA_Main_Pathway	KEGG_Ribosome_biogenesis_in_eukaryotes_Main_Pathway	NA	NA	reactome_Chk1_Chk2_Cds1_mediated_inactivation_of_Cyclin_B_Cdk1_complex_Main_Pathway	NA	NA	NA	NA	NA	NA	NA	NA	NA	NA
reactome_CaMK_IV_mediated_phosphorylation_of_CREB_Main_Pathway	KEGG_Ribosome_Main_Pathway	NA	NA	reactome_Cohesin_Loading_onto_Chromatin_Main_Pathway	NA	NA	NA	NA	NA	NA	NA	NA	NA	NA
reactome_Carnitine_synthesis_Main_Pathway	KEGG_RNA_degradation_Main_Pathway	NA	NA	reactome_Condensation_of_Prometaphase_Chromosomes_Main_Pathway	NA	NA	NA	NA	NA	NA	NA	NA	NA	NA
reactome_CDC6_association_with_the_ORC_origin_complex_Main_Pathway	KEGG_RNA_polymerase_Main_Pathway	NA	NA	reactome_Condensation_of_Prophase_Chromosomes_Main_Pathway	NA	NA	NA	NA	NA	NA	NA	NA	NA	NA
reactome_cell_division_Main_Pathway	KEGG_RNA_transport_Main_Pathway	NA	NA	reactome_CREB_phosphorylation_through_the_activation_of_CaMKK_Main_Pathway	NA	NA	NA	NA	NA	NA	NA	NA	NA	NA
reactome_Chk1_Chk2_Cds1_mediated_inactivation_of_Cyclin_B_Cdk1_complex_Main_Pathway	KEGG_Selenocompound_metabolism_Main_Pathway	NA	NA	reactome_CRMPs_in_Sema3A_signaling_Main_Pathway	NA	NA	NA	NA	NA	NA	NA	NA	NA	NA
reactome_Cohesin_Loading_onto_Chromatin_Main_Pathway	KEGG_Spliceosome_Main_Pathway	NA	NA	reactome_Cyclin_A_B1_associated_events_during_G2_M_transition_Main_Pathway	NA	NA	NA	NA	NA	NA	NA	NA	NA	NA
reactome_Condensation_of_Prometaphase_Chromosomes_Main_Pathway	KEGG_TGF_beta_signaling_Main_Pathway	NA	NA	reactome_Cyclin_A_Cdk2_associated_events_at_S_phase_entry_Main_Pathway	NA	NA	NA	NA	NA	NA	NA	NA	NA	NA
reactome_Condensation_of_Prophase_Chromosomes_Main_Pathway	KEGG_Transcriptional_misregulation_in_cancer_Main_Pathway	NA	NA	reactome_Cyclin_B2_mediated_events_Main_Pathway	NA	NA	NA	NA	NA	NA	NA	NA	NA	NA
reactome_CREB_phosphorylation_through_the_activation_of_CaMKK_Main_Pathway	KEGG_Tryptophan_metabolism_Main_Pathway	NA	NA	reactome_Deposition_of_new_CENPA_containing_nucleosomes_at_the_centromere_Main_Pathway	NA	NA	NA	NA	NA	NA	NA	NA	NA	NA
reactome_CRMPs_in_Sema3A_signaling_Main_Pathway	KEGG_Tuberculosis_Main_Pathway	NA	NA	reactome_DNA_Damage_Telomere_Stress_Induced_Senescence_Main_Pathway	NA	NA	NA	NA	NA	NA	NA	NA	NA	NA
reactome_Cyclin_A_B1_associated_events_during_G2_M_transition_Main_Pathway	KEGG_Ubiquinone_and_other_terpenoid_quinone_biosynthesis_Main_Pathway	NA	NA	reactome_DNA_replication_initiation_Main_Pathway	NA	NA	NA	NA	NA	NA	NA	NA	NA	NA
reactome_Cyclin_A_Cdk2_associated_events_at_S_phase_entry_Main_Pathway	KEGG_Ubiquitin_mediated_proteolysis_Main_Pathway	NA	NA	reactome_E2F_enabled_inhibition_of_pre_replication_complex_formation_Main_Pathway	NA	NA	NA	NA	NA	NA	NA	NA	NA	NA
reactome_Cyclin_B2_mediated_events_Main_Pathway	KEGG_Vasopressin_regulated_water_reabsorption_Main_Pathway	NA	NA	reactome_E2F_mediated_regulation_of_DNA_replication_Main_Pathway	NA	NA	NA	NA	NA	NA	NA	NA	NA	NA
reactome_Deposition_of_new_CENPA_containing_nucleosomes_at_the_centromere_Main_Pathway	KEGG_Viral_carcinogenesis_Main_Pathway	NA	NA	reactome_Early_Phase_of_HIV_Life_Cycle_Main_Pathway	NA	NA	NA	NA	NA	NA	NA	NA	NA	NA
reactome_DNA_Damage_Telomere_Stress_Induced_Senescence_Main_Pathway	KEGG_Vitamin_digestion_and_absorption_Main_Pathway	NA	NA	reactome_ERK1_activation_Main_Pathway	NA	NA	NA	NA	NA	NA	NA	NA	NA	NA
reactome_DNA_replication_initiation_Main_Pathway	MAPK_Family_Pathway_Chromatin_Remodelling	NA	NA	reactome_Establishment_of_Sister_Chromatid_Cohesion_Main_Pathway	NA	NA	NA	NA	NA	NA	NA	NA	NA	NA
reactome_E2F_enabled_inhibition_of_pre_replication_complex_formation_Main_Pathway	MAPK_Signaling_Pathway_Cell_Survival	NA	NA	reactome_Eukaryotic_Translation_Elongation_Main_Pathway	NA	NA	NA	NA	NA	NA	NA	NA	NA	NA
reactome_E2F_mediated_regulation_of_DNA_replication_Main_Pathway	Mismatch_Repair_in_Eukaryotes_Pathway	NA	NA	reactome_Fanconi_Anemia_Main_Pathway	NA	NA	NA	NA	NA	NA	NA	NA	NA	NA
reactome_Early_Phase_of_HIV_Life_Cycle_Main_Pathway	mTOR_Pathway_Cap-dependent_Translation	NA	NA	reactome_Fatty_Acyl_CoA_Biosynthesis_Main_Pathway	NA	NA	NA	NA	NA	NA	NA	NA	NA	NA
reactome_ERK1_activation_Main_Pathway	mTOR_Pathway_mRNA_Biogenesis	NA	NA	reactome_Formation_of_Senescence_Associated_Heterochromatin_Foci_SAHF__Main_Pathway	NA	NA	NA	NA	NA	NA	NA	NA	NA	NA
reactome_Establishment_of_Sister_Chromatid_Cohesion_Main_Pathway	NCI_ALK2_signaling_events_Main_Pathway	NA	NA	reactome_formation_of_the_beta_catenin_TCF_transactivating_complex_Main_Pathway	NA	NA	NA	NA	NA	NA	NA	NA	NA	NA
reactome_Eukaryotic_Translation_Elongation_Main_Pathway	NCI_Alpha_synuclein_signaling_Main_Pathway	NA	NA	reactome_G1_S_Specific_Transcription_Main_Pathway	NA	NA	NA	NA	NA	NA	NA	NA	NA	NA
reactome_Fanconi_Anemia_Main_Pathway	NCI_Alpha_synuclein_signaling_Pathway_(cell_death)	NA	NA	reactome_G2_M_DNA_replication_checkpoint_Main_Pathway	NA	NA	NA	NA	NA	NA	NA	NA	NA	NA
reactome_Fatty_Acyl_CoA_Biosynthesis_Main_Pathway	NCI_Alpha_synuclein_signaling_Pathway_(proteasomal_ubiquitin_dependent_protein_catabolic_process)	NA	NA	reactome_G2_Phase_Main_Pathway	NA	NA	NA	NA	NA	NA	NA	NA	NA	NA
reactome_Formation_of_Senescence_Associated_Heterochromatin_Foci_SAHF__Main_Pathway	NCI_amb2_Integrin_signaling_Pathway_(leukocyte_adhesion)	NA	NA	reactome_HATs_acetylate_histones_Main_Pathway	NA	NA	NA	NA	NA	NA	NA	NA	NA	NA
reactome_formation_of_the_beta_catenin_TCF_transactivating_complex_Main_Pathway	NCI_Arf6_signaling_events_Main_Pathway	NA	NA	reactome_HDACs_deacetylate_histones_Main_Pathway	NA	NA	NA	NA	NA	NA	NA	NA	NA	NA
reactome_G1_S_Specific_Transcription_Main_Pathway	NCI_ATM_Main_Pathway	NA	NA	reactome_HuR_stabilizes_mRNA_Main_Pathway	NA	NA	NA	NA	NA	NA	NA	NA	NA	NA
reactome_G2_M_DNA_replication_checkpoint_Main_Pathway	NCI_ATM_Pathway_(chromatin_remodeling)	NA	NA	reactome_Inactivation_of_APC_C_via_direct_inhibition_of_the_APC_C_complex_Main_Pathway	NA	NA	NA	NA	NA	NA	NA	NA	NA	NA
reactome_G2_Phase_Main_Pathway	NCI_ATM_Pathway_(double_strand_break_repair_via_nonhomologous_end_joining)	NA	NA	reactome_Inhibition_of_replication_initiation_of_damaged_DNA_by_RB1_E2F1_Main_Pathway	NA	NA	NA	NA	NA	NA	NA	NA	NA	NA
reactome_HATs_acetylate_histones_Main_Pathway	NCI_ATM_Pathway_(G1_S_transition_checkpoint)	NA	NA	reactome_Integration_of_viral_DNA_into_host_genomic_DNA_Main_Pathway	NA	NA	NA	NA	NA	NA	NA	NA	NA	NA
reactome_HDACs_deacetylate_histones_Main_Pathway	NCI_ATM_Pathway_(G2_M_transition_checkpoint)	NA	NA	reactome_Kinesins_Main_Pathway	NA	NA	NA	NA	NA	NA	NA	NA	NA	NA
reactome_HuR_stabilizes_mRNA_Main_Pathway	NCI_ATM_Pathway_(Pathway_rRNA_transcription_via_ATM)	NA	NA	reactome_KSRP_destabilizes_mRNA_Main_Pathway	NA	NA	NA	NA	NA	NA	NA	NA	NA	NA
reactome_Hypusinylation_Main_Pathway	NCI_ATR_signaling_Main_Pathway	NA	NA	reactome_Leading_Strand_Synthesis_Main_Pathway	NA	NA	NA	NA	NA	NA	NA	NA	NA	NA
reactome_Inactivation_of_APC_C_via_direct_inhibition_of_the_APC_C_complex_Main_Pathway	NCI_ATR_signaling_Pathway_(Pathway_negative_regulation_of_transcription_during_mitosis_via_CHEK1)	NA	NA	reactome_Meiotic_recombination_Main_Pathway	NA	NA	NA	NA	NA	NA	NA	NA	NA	NA
reactome_Inhibition_of_replication_initiation_of_damaged_DNA_by_RB1_E2F1_Main_Pathway	NCI_ATR_signaling_Pathway_(regulation_of_double_strand_break_repair_via_homologous_recombination)	NA	NA	reactome_Meiotic_synapsis_Main_Pathway	NA	NA	NA	NA	NA	NA	NA	NA	NA	NA
reactome_Integration_of_viral_DNA_into_host_genomic_DNA_Main_Pathway	NCI_ATR_signaling_Pathway_(response_to_G2_M_transition_DNA_damage_checkpoint_signal)	NA	NA	reactome_Metabolism_of_folate_and_pterines_Main_Pathway	NA	NA	NA	NA	NA	NA	NA	NA	NA	NA
reactome_Interconversion_of_2_oxoglutarate_and_2_hydroxyglutarate_Main_Pathway	NCI_Atypical_NF_kappaB_Main_Pathway	NA	NA	reactome_Mismatch_repair_MMR_directed_by_MSH2_MSH3_MutSbeta__Main_Pathway	NA	NA	NA	NA	NA	NA	NA	NA	NA	NA
reactome_Kinesins_Main_Pathway	NCI_Atypical_NF_kappaB_Pathway_(Pathway_degradation_of_NFKB1_NFKBIA)	NA	NA	reactome_Mismatch_repair_MMR_directed_by_MSH2_MSH6_MutSalpha__Main_Pathway	NA	NA	NA	NA	NA	NA	NA	NA	NA	NA
reactome_KSRP_destabilizes_mRNA_Main_Pathway	NCI_Atypical_NF_kappaB_Pathway_(Pathway_degradation_of_NFKBIA)	NA	NA	reactome_Mitochondrial_transcription_initiation_Main_Pathway	NA	NA	NA	NA	NA	NA	NA	NA	NA	NA
reactome_Leading_Strand_Synthesis_Main_Pathway	NCI_Atypical_NF_kappaB_Pathway_(positive_regulation_of_anti_apoptosis)	NA	NA	reactome_Mitotic_Prometaphase_Main_Pathway	NA	NA	NA	NA	NA	NA	NA	NA	NA	NA
reactome_Meiotic_recombination_Main_Pathway	NCI_Aurora_A_signaling_Main_Pathway	NA	NA	reactome_mRNA_decay_by_3_to_5_exoribonuclease_Main_Pathway	NA	NA	NA	NA	NA	NA	NA	NA	NA	NA
reactome_Meiotic_synapsis_Main_Pathway	NCI_Aurora_A_signaling_Pathway_(centrosome_duplication)	NA	NA	reactome_negative_regulation_of_TCF_dependent_signaling_by_DVL_interacting_proteins_Main_Pathway	NA	NA	NA	NA	NA	NA	NA	NA	NA	NA
reactome_Metabolism_of_folate_and_pterines_Main_Pathway	NCI_Aurora_A_signaling_Pathway_(negative_regulation_of_DNA_binding)	NA	NA	reactome_NEP_NS2_Interacts_with_the_Cellular_Export_Machinery_Main_Pathway	NA	NA	NA	NA	NA	NA	NA	NA	NA	NA
reactome_Mismatch_repair_MMR_directed_by_MSH2_MSH3_MutSbeta__Main_Pathway	NCI_Aurora_A_signaling_Pathway_(proteasomal_ubiquitin_dependent_protein_catabolic_process)	NA	NA	reactome_NoRC_negatively_regulates_rRNA_expression_Main_Pathway	NA	NA	NA	NA	NA	NA	NA	NA	NA	NA
reactome_Mismatch_repair_MMR_directed_by_MSH2_MSH6_MutSalpha__Main_Pathway	NCI_Aurora_A_signaling_Pathway_(protein_catabolic_process)	NA	NA	reactome_Nuclear_import_of_Rev_protein_Main_Pathway	NA	NA	NA	NA	NA	NA	NA	NA	NA	NA
reactome_Mitochondrial_transcription_initiation_Main_Pathway	NCI_Aurora_A_signaling_Pathway_(regulation_of_centrosome_cycle)	NA	NA	reactome_Nuclear_Pore_Complex_NPC_Disassembly_Main_Pathway	NA	NA	NA	NA	NA	NA	NA	NA	NA	NA
reactome_Mitotic_Prometaphase_Main_Pathway	NCI_Aurora_A_signaling_Pathway_(spindle_assembly)	NA	NA	reactome_Orc1_removal_from_chromatin_Main_Pathway	NA	NA	NA	NA	NA	NA	NA	NA	NA	NA
reactome_mRNA_decay_by_3_to_5_exoribonuclease_Main_Pathway	NCI_Aurora_B_signaling_Main_Pathway	NA	NA	reactome_Packaging_Of_Telomere_Ends_Main_Pathway	NA	NA	NA	NA	NA	NA	NA	NA	NA	NA
reactome_negative_regulation_of_TCF_dependent_signaling_by_DVL_interacting_proteins_Main_Pathway	NCI_Aurora_B_signaling_Pathway_(cytokinesis)	NA	NA	reactome_Phosphorylation_of_Emi1_Main_Pathway	NA	NA	NA	NA	NA	NA	NA	NA	NA	NA
reactome_NEP_NS2_Interacts_with_the_Cellular_Export_Machinery_Main_Pathway	NCI_Aurora_C_signaling_Main_Pathway	NA	NA	reactome_Phosphorylation_of_proteins_involved_in_the_G2_M_transition_by_Cyclin_A_Cdc2_complexes_Main_Pathway	NA	NA	NA	NA	NA	NA	NA	NA	NA	NA
reactome_NoRC_negatively_regulates_rRNA_expression_Main_Pathway	NCI_BARD1_signaling_events_Main_Pathway	NA	NA	reactome_Phosphorylation_of_the_APC_C_Main_Pathway	NA	NA	NA	NA	NA	NA	NA	NA	NA	NA
reactome_Nuclear_import_of_Rev_protein_Main_Pathway	NCI_BARD1_signaling_events_Pathway_(DNA_damage_checkpoint)	NA	NA	reactome_Polo_like_kinase_mediated_events_Main_Pathway	NA	NA	NA	NA	NA	NA	NA	NA	NA	NA
reactome_Nuclear_Pore_Complex_NPC_Disassembly_Main_Pathway	NCI_BARD1_signaling_events_Pathway_(DNA_repair)	NA	NA	reactome_Polymerase_switching_Main_Pathway	NA	NA	NA	NA	NA	NA	NA	NA	NA	NA
reactome_Orc1_removal_from_chromatin_Main_Pathway	NCI_BARD1_signaling_events_Pathway_(protein_ubiquitination)	NA	NA	reactome_Polymerase_switching_on_the_C_strand_of_the_telomere_Main_Pathway	NA	NA	NA	NA	NA	NA	NA	NA	NA	NA
reactome_Packaging_Of_Telomere_Ends_Main_Pathway	NCI_BMP_receptor_signaling_Main_Pathway	NA	NA	reactome_PRC2_methylates_histones_and_DNA_Main_Pathway	NA	NA	NA	NA	NA	NA	NA	NA	NA	NA
reactome_Phosphorylation_of_Emi1_Main_Pathway	NCI_C_MYB_transcription_factor_network_Main_Pathway	NA	NA	reactome_pre_mRNA_splicing_Main_Pathway	NA	NA	NA	NA	NA	NA	NA	NA	NA	NA
reactome_Phosphorylation_of_proteins_involved_in_the_G2_M_transition_by_Cyclin_A_Cdc2_complexes_Main_Pathway	NCI_C_MYC_Main_Pathway	NA	NA	reactome_Presynaptic_phase_of_homologous_DNA_pairing_and_strand_exchange_Main_Pathway	NA	NA	NA	NA	NA	NA	NA	NA	NA	NA
reactome_Phosphorylation_of_the_APC_C_Main_Pathway	NCI_Calcineurin_regulated_NFAT_dependent_transcription_in_lymphocytes_Main_Pathway	NA	NA	reactome_Processing_of_DNA_double_strand_break_ends_Main_Pathway	NA	NA	NA	NA	NA	NA	NA	NA	NA	NA
reactome_Polo_like_kinase_mediated_events_Main_Pathway	NCI_Caspase_Cascade_in_Apoptosis_Pathway_(actin_filament_polymerization)	NA	NA	reactome_Processing_of_DNA_ends_prior_to_end_rejoining_Main_Pathway	NA	NA	NA	NA	NA	NA	NA	NA	NA	NA
reactome_Polymerase_switching_Main_Pathway	NCI_Caspase_Cascade_in_Apoptosis_Pathway_(DNA_fragmentation_during_apoptosis)	NA	NA	reactome_Processive_synthesis_on_the_C_strand_of_the_telomere_Main_Pathway	NA	NA	NA	NA	NA	NA	NA	NA	NA	NA
reactome_Polymerase_switching_on_the_C_strand_of_the_telomere_Main_Pathway	NCI_Caspase_Cascade_in_Apoptosis_Pathway_(DNA_repair)	NA	NA	reactome_Processive_synthesis_on_the_lagging_strand_Main_Pathway	NA	NA	NA	NA	NA	NA	NA	NA	NA	NA
reactome_PRC2_methylates_histones_and_DNA_Main_Pathway	NCI_Caspase_Cascade_in_Apoptosis_Pathway_(neuron_apoptosis)	NA	NA	reactome_Purine_ribonucleoside_monophosphate_biosynthesis_Main_Pathway	NA	NA	NA	NA	NA	NA	NA	NA	NA	NA
reactome_pre_mRNA_splicing_Main_Pathway	NCI_Caspase_Cascade_in_Apoptosis_Pathway_(nuclear_fragmentation_during_apoptosis)	NA	NA	reactome_Pyrimidine_biosynthesis_Main_Pathway	NA	NA	NA	NA	NA	NA	NA	NA	NA	NA
reactome_Presynaptic_phase_of_homologous_DNA_pairing_and_strand_exchange_Main_Pathway	NCI_Caspase_Cascade_in_Apoptosis_Pathway_(positive_regulation_of_apoptosis)	NA	NA	reactome_Pyrimidine_salvage_reactions_Main_Pathway	NA	NA	NA	NA	NA	NA	NA	NA	NA	NA
reactome_Processing_of_DNA_double_strand_break_ends_Main_Pathway	NCI_CDC42_signaling_events_Pathway_(neuron_projection_development)	NA	NA	reactome_Recruitment_of_NuMA_to_mitotic_centrosomes_Main_Pathway	NA	NA	NA	NA	NA	NA	NA	NA	NA	NA
reactome_Processing_of_DNA_ends_prior_to_end_rejoining_Main_Pathway	NCI_CDC42_signaling_events_Pathway_(regulation_of_filopodium_assembly)	NA	NA	reactome_Recruitment_of_repair_and_signaling_proteins_to_double_strand_breaks_Main_Pathway	NA	NA	NA	NA	NA	NA	NA	NA	NA	NA
reactome_Processive_synthesis_on_the_C_strand_of_the_telomere_Main_Pathway	NCI_Ceramide_signaling_Pathway_(cell_survival)	NA	NA	reactome_Regulation_of_APC_C_activators_between_G1_S_and_early_anaphase_Main_Pathway	NA	NA	NA	NA	NA	NA	NA	NA	NA	NA
reactome_Processive_synthesis_on_the_lagging_strand_Main_Pathway	NCI_Circadian_rhythm_Main_Pathway	NA	NA	reactome_Regulation_of_Glucokinase_by_Glucokinase_Regulatory_Protein_Main_Pathway	NA	NA	NA	NA	NA	NA	NA	NA	NA	NA
reactome_Purine_ribonucleoside_monophosphate_biosynthesis_Main_Pathway	NCI_Circadian_rhythm_Pathway_(chromatin_modification)	NA	NA	reactome_Removal_of_DNA_patch_containing_abasic_residue_Main_Pathway	NA	NA	NA	NA	NA	NA	NA	NA	NA	NA
reactome_Pyrimidine_biosynthesis_Main_Pathway	NCI_Circadian_rhythm_Pathway_(S_phase_of_mitotic_cell_cycle)	NA	NA	reactome_Removal_of_the_Flap_Intermediate_from_the_C_strand_Main_Pathway	NA	NA	NA	NA	NA	NA	NA	NA	NA	NA
reactome_Pyrimidine_salvage_reactions_Main_Pathway	NCI_Class_I_PI3K_signaling_events_mediated_by_Akt_Pathway_(glucose_import)	NA	NA	reactome_Removal_of_the_Flap_Intermediate_Main_Pathway	NA	NA	NA	NA	NA	NA	NA	NA	NA	NA
reactome_Recruitment_of_NuMA_to_mitotic_centrosomes_Main_Pathway	NCI_Class_IB_PI3K_non_lipid_kinase_events_Main_Pathway	NA	NA	reactome_Repair_synthesis_for_gap_filling_by_DNA_polymerase_in_TC_NER_Main_Pathway	NA	NA	NA	NA	NA	NA	NA	NA	NA	NA
reactome_Recruitment_of_repair_and_signaling_proteins_to_double_strand_breaks_Main_Pathway	NCI_Class_IB_PI3K_non_lipid_kinase_events_Pathway_(cAMP_biosynthetic_process)	NA	NA	reactome_Repair_synthesis_of_patch_27_30_bases_long_by_DNA_polymerase_Main_Pathway	NA	NA	NA	NA	NA	NA	NA	NA	NA	NA
reactome_Regulation_of_APC_C_activators_between_G1_S_and_early_anaphase_Main_Pathway	NCI_CXCR3_mediated_signaling_events_Main_Pathway	NA	NA	reactome_repression_of_WNT_target_genes_Main_Pathway	NA	NA	NA	NA	NA	NA	NA	NA	NA	NA
reactome_Regulation_of_Glucokinase_by_Glucokinase_Regulatory_Protein_Main_Pathway	NCI_CXCR3_mediated_signaling_events_Pathway_(actin_polymerization_or_depolymerization)	NA	NA	reactome_Resolution_of_AP_sites_via_the_multiple_nucleotide_patch_replacement_Main_Pathway	NA	NA	NA	NA	NA	NA	NA	NA	NA	NA
reactome_Removal_of_DNA_patch_containing_abasic_residue_Main_Pathway	NCI_CXCR3_mediated_signaling_events_Pathway_(cell_adhesion)	NA	NA	reactome_Resolution_of_AP_sites_via_the_single_nucleotide_replacement_Main_Pathway	NA	NA	NA	NA	NA	NA	NA	NA	NA	NA
reactome_Removal_of_the_Flap_Intermediate_from_the_C_strand_Main_Pathway	NCI_CXCR3_mediated_signaling_events_Pathway_(cell_proliferation)	NA	NA	reactome_Resolution_of_Sister_Chromatid_Cohesion_Main_Pathway	NA	NA	NA	NA	NA	NA	NA	NA	NA	NA
reactome_Removal_of_the_Flap_Intermediate_Main_Pathway	NCI_CXCR3_mediated_signaling_events_Pathway_(chemotaxis)	NA	NA	reactome_Rev_mediated_nuclear_export_of_HIV_RNA_Main_Pathway	NA	NA	NA	NA	NA	NA	NA	NA	NA	NA
reactome_Repair_synthesis_for_gap_filling_by_DNA_polymerase_in_TC_NER_Main_Pathway	NCI_CXCR4_mediated_signaling_events_Main_Pathway	NA	NA	reactome_RMTs_methylate_histone_arginines_Main_Pathway	NA	NA	NA	NA	NA	NA	NA	NA	NA	NA
reactome_Repair_synthesis_of_patch_27_30_bases_long_by_DNA_polymerase_Main_Pathway	NCI_CXCR4_mediated_signaling_events_Pathway_(cell_adhesion)	NA	NA	reactome_RNA_Polymerase_I_Chain_Elongation_Main_Pathway	NA	NA	NA	NA	NA	NA	NA	NA	NA	NA
reactome_repression_of_WNT_target_genes_Main_Pathway	NCI_CXCR4_mediated_signaling_events_Pathway_(cell_proliferation)	NA	NA	reactome_Role_of_second_messengers_in_netrin_1_signaling_Main_Pathway	NA	NA	NA	NA	NA	NA	NA	NA	NA	NA
reactome_Resolution_of_AP_sites_via_the_multiple_nucleotide_patch_replacement_Main_Pathway	NCI_CXCR4_mediated_signaling_events_Pathway_(chemotaxis)	NA	NA	reactome_Senescence_Associated_Secretory_Phenotype_SASP__Main_Pathway	NA	NA	NA	NA	NA	NA	NA	NA	NA	NA
reactome_Resolution_of_AP_sites_via_the_single_nucleotide_replacement_Main_Pathway	NCI_CXCR4_mediated_signaling_events_Pathway_(establishment_of_cell_polarity)	NA	NA	reactome_Separation_of_Sister_Chromatids_Main_Pathway	NA	NA	NA	NA	NA	NA	NA	NA	NA	NA
reactome_Resolution_of_Sister_Chromatid_Cohesion_Main_Pathway	NCI_CXCR4_mediated_signaling_events_Pathway_(regulation_of_heterotypic_cell_cell_adhesion)	NA	NA	reactome_SIRT1_negatively_regulates_rRNA_Expression_Main_Pathway	NA	NA	NA	NA	NA	NA	NA	NA	NA	NA
reactome_Rev_mediated_nuclear_export_of_HIV_RNA_Main_Pathway	NCI_DNA_PK_pathway_in_nonhomologous_end_joining_Main_Pathway	NA	NA	reactome_SLBP_Dependent_Processing_of_Replication_Dependent_Histone_Pre_mRNAs_Main_Pathway	NA	NA	NA	NA	NA	NA	NA	NA	NA	NA
reactome_RMTs_methylate_histone_arginines_Main_Pathway	NCI_DNA_PK_pathway_in_nonhomologous_end_joining_Pathway_(double_strand_break_repair_via_homologous_recombination)	NA	NA	reactome_SLBP_independent_Processing_of_Histone_Pre_mRNAs_Main_Pathway	NA	NA	NA	NA	NA	NA	NA	NA	NA	NA
reactome_RNA_Polymerase_I_Chain_Elongation_Main_Pathway	NCI_DNA_PK_pathway_in_nonhomologous_end_joining_Pathway_(double_strand_break_repair_via_nonhomologous_end_joining)	NA	NA	reactome_snRNP_Assembly_Main_Pathway	NA	NA	NA	NA	NA	NA	NA	NA	NA	NA
reactome_Role_of_second_messengers_in_netrin_1_signaling_Main_Pathway	NCI_DNA_PK_pathway_in_nonhomologous_end_joining_Pathway_(immunoglobulin_heavy_chain_V_D_J_recombination)	NA	NA	reactome_Sodium_Proton_exchangers_Main_Pathway	NA	NA	NA	NA	NA	NA	NA	NA	NA	NA
reactome_Senescence_Associated_Secretory_Phenotype_SASP__Main_Pathway	NCI_DNA_PK_pathway_in_nonhomologous_end_joining_Pathway_(immunoglobulin_light_chain_V_J_recombination)	NA	NA	reactome_SUMO_is_conjugated_to_E1_UBA2_SAE1__Main_Pathway	NA	NA	NA	NA	NA	NA	NA	NA	NA	NA
reactome_Separation_of_Sister_Chromatids_Main_Pathway	NCI_DNA_PK_pathway_in_nonhomologous_end_joining_Pathway_(V_D_J_recombination)	NA	NA	reactome_SUMO_is_proteolytically_processed_Main_Pathway	NA	NA	NA	NA	NA	NA	NA	NA	NA	NA
reactome_SIRT1_negatively_regulates_rRNA_Expression_Main_Pathway	NCI_E_cadherin_signaling_in_the_nascent_adherens_junction_Pathway_(actin_cytoskeleton_organization)	NA	NA	reactome_SUMO_is_transferred_from_E1_to_E2_UBE2I_UBC9__Main_Pathway	NA	NA	NA	NA	NA	NA	NA	NA	NA	NA
reactome_SLBP_Dependent_Processing_of_Replication_Dependent_Histone_Pre_mRNAs_Main_Pathway	NCI_Endogenous_TLR_signaling_Pathway_(regulation_of_cell_adhesion)	NA	NA	reactome_Switching_of_origins_to_a_post_replicative_state_Main_Pathway	NA	NA	NA	NA	NA	NA	NA	NA	NA	NA
reactome_SLBP_independent_Processing_of_Histone_Pre_mRNAs_Main_Pathway	NCI_Endothelins_Pathway_(arachidonic_acid_secretion)	NA	NA	reactome_Synthesis_of_16_20_hydroxyeicosatetraenoic_acids_HETE__Main_Pathway	NA	NA	NA	NA	NA	NA	NA	NA	NA	NA
reactome_snRNP_Assembly_Main_Pathway	NCI_Ephrin_B_reverse_signaling_Pathway_(endothelial_cell_proliferation)	NA	NA	reactome_Synthesis_of_PIPs_at_the_late_endosome_membrane_Main_Pathway	NA	NA	NA	NA	NA	NA	NA	NA	NA	NA
reactome_Sodium_Proton_exchangers_Main_Pathway	NCI_ErbB2_ErbB3_signaling_events_Pathway_(apoptosis)	NA	NA	reactome_Telomere_C_strand_Lagging_Strand_Synthesis_Main_Pathway	NA	NA	NA	NA	NA	NA	NA	NA	NA	NA
reactome_SUMO_is_conjugated_to_E1_UBA2_SAE1__Main_Pathway	NCI_Fanconi_anemia_Main_Pathway	NA	NA	reactome_Telomere_C_strand_synthesis_initiation_Main_Pathway	NA	NA	NA	NA	NA	NA	NA	NA	NA	NA
reactome_SUMO_is_proteolytically_processed_Main_Pathway	NCI_Fanconi_anemia_Pathway_(DNA_repair)	NA	NA	reactome_Telomere_Extension_By_Telomerase_Main_Pathway	NA	NA	NA	NA	NA	NA	NA	NA	NA	NA
reactome_SUMO_is_transferred_from_E1_to_E2_UBE2I_UBC9__Main_Pathway	NCI_Fanconi_anemia_Pathway_(G1_S_transition_checkpoint)	NA	NA	reactome_Toxicity_of_botulinum_toxin_type_C_BoNT_C__Main_Pathway	NA	NA	NA	NA	NA	NA	NA	NA	NA	NA
reactome_Switching_of_origins_to_a_post_replicative_state_Main_Pathway	NCI_Fanconi_anemia_Pathway_(regulation_of_double_strand_break_repair_via_homologous_recombination)	NA	NA	reactome_Toxicity_of_botulinum_toxin_type_E_BoNT_E__Main_Pathway	NA	NA	NA	NA	NA	NA	NA	NA	NA	NA
reactome_Synthesis_of_16_20_hydroxyeicosatetraenoic_acids_HETE__Main_Pathway	NCI_Fanconi_anemia_Pathway_(Sister_Chromatid_Exchange_Process)	NA	NA	reactome_Transcriptional_activation_of_mitochondrial_biogenesis_Main_Pathway	NA	NA	NA	NA	NA	NA	NA	NA	NA	NA
reactome_Synthesis_of_PIPs_at_the_late_endosome_membrane_Main_Pathway	NCI_FAS_CD95_signaling_Pathway_(cell_cycle)	NA	NA	reactome_Transport_of_Mature_mRNA_derived_from_an_Intron_Containing_Transcript_Main_Pathway	NA	NA	NA	NA	NA	NA	NA	NA	NA	NA
reactome_Telomere_C_strand_Lagging_Strand_Synthesis_Main_Pathway	NCI_FGF_signaling_Pathway_(cell_migration)	NA	NA	reactome_Transport_of_Mature_mRNA_Derived_from_an_Intronless_Transcript_Main_Pathway	NA	NA	NA	NA	NA	NA	NA	NA	NA	NA
reactome_Telomere_C_strand_synthesis_initiation_Main_Pathway	NCI_FGF_signaling_Pathway_(negative_regulation_of_apoptosis)	NA	NA	reactome_Transport_of_Ribonucleoproteins_into_the_Host_Nucleus_Main_Pathway	NA	NA	NA	NA	NA	NA	NA	NA	NA	NA
reactome_Telomere_Extension_By_Telomerase_Main_Pathway	NCI_FOXM1_transcription_factor_network_Main_Pathway	NA	NA	reactome_Transport_of_the_SLBP_Dependant_Mature_mRNA_Main_Pathway	NA	NA	NA	NA	NA	NA	NA	NA	NA	NA
reactome_Toxicity_of_botulinum_toxin_type_C_BoNT_C__Main_Pathway	NCI_Glucocorticoid_receptor_regulatory_network_Pathway_(apoptosis)	NA	NA	reactome_Transport_of_the_SLBP_independent_Mature_mRNA_Main_Pathway	NA	NA	NA	NA	NA	NA	NA	NA	NA	NA
reactome_Toxicity_of_botulinum_toxin_type_E_BoNT_E__Main_Pathway	NCI_Glucocorticoid_receptor_regulatory_network_Pathway_(histone_acetylation)	NA	NA	reactome_Transport_of_vitamins_nucleosides_and_related_molecules_Main_Pathway	NA	NA	NA	NA	NA	NA	NA	NA	NA	NA
reactome_Transcriptional_activation_of_mitochondrial_biogenesis_Main_Pathway	NCI_Glucocorticoid_receptor_regulatory_network_Pathway_(MAPKKK_cascade)	NA	NA	reactome_Ubiquinol_biosynthesis_Main_Pathway	NA	NA	NA	NA	NA	NA	NA	NA	NA	NA
reactome_Transport_of_Mature_mRNA_derived_from_an_Intron_Containing_Transcript_Main_Pathway	NCI_Glypican_2_network_Main_Pathway	NA	NA	reactome_Unwinding_of_DNA_Main_Pathway	NA	NA	NA	NA	NA	NA	NA	NA	NA	NA
reactome_Transport_of_Mature_mRNA_Derived_from_an_Intronless_Transcript_Main_Pathway	NCI_HIF_1_alpha_transcription_factor_network_Main_Pathway	NA	NA	reactome_Vitamin_B5_pantothenate_metabolism_Main_Pathway	NA	NA	NA	NA	NA	NA	NA	NA	NA	NA
reactome_Transport_of_Ribonucleoproteins_into_the_Host_Nucleus_Main_Pathway	NCI_HIF_2_alpha_transcription_factor_network_Main_Pathway	NA	NA	reactome_Vpr_mediated_nuclear_import_of_PICs_Main_Pathway	NA	NA	NA	NA	NA	NA	NA	NA	NA	NA
reactome_Transport_of_the_SLBP_Dependant_Mature_mRNA_Main_Pathway	NCI_HIF_2_alpha_transcription_factor_network_Pathway_(neuron_apoptosis)	NA	NA	reactome_WNT5A_dependent_internalization_of_FZD2_FZD5_and_ROR2_Main_Pathway	NA	NA	NA	NA	NA	NA	NA	NA	NA	NA
reactome_Transport_of_the_SLBP_independent_Mature_mRNA_Main_Pathway	NCI_HIV_1_Nef_Negative_effector_of_Fas_and_TNF_alpha_Main_Pathway	NA	NA	reactome_WNT5A_dependent_internalization_of_FZD4_Main_Pathway	NA	NA	NA	NA	NA	NA	NA	NA	NA	NA
reactome_Transport_of_vitamins_nucleosides_and_related_molecules_Main_Pathway	NCI_HIV_1_Nef_Negative_effector_of_Fas_and_TNF_alpha_Pathway_(Pathway_degradation_of_CASP3_CASP7_CASP6)	NA	NA	NA	NA	NA	NA	NA	NA	NA	NA	NA	NA	NA
reactome_Ubiquinol_biosynthesis_Main_Pathway	NCI_HIV_1_Nef_Negative_effector_of_Fas_and_TNF_alpha_Pathway_(protein_ubiquitination)	NA	NA	NA	NA	NA	NA	NA	NA	NA	NA	NA	NA	NA
reactome_Unwinding_of_DNA_Main_Pathway	NCI_Hypoxic_and_oxygen_homeostasis_regulation_of_HIF_1_alpha_Main_Pathway	NA	NA	NA	NA	NA	NA	NA	NA	NA	NA	NA	NA	NA
reactome_Vitamin_B5_pantothenate_metabolism_Main_Pathway	NCI_IL2_mediated_signaling_events_Pathway_(G1_S_transition_of_mitotic_cell_cycle)	NA	NA	NA	NA	NA	NA	NA	NA	NA	NA	NA	NA	NA
reactome_Vpr_mediated_induction_of_apoptosis_by_mitochondrial_outer_membrane_permeabilization_Main_Pathway	NCI_IL3_mediated_signaling_events_Main_Pathway	NA	NA	NA	NA	NA	NA	NA	NA	NA	NA	NA	NA	NA
reactome_Vpr_mediated_nuclear_import_of_PICs_Main_Pathway	NCI_IL8_and_CXCR1_mediated_signaling_events_Main_Pathway	NA	NA	NA	NA	NA	NA	NA	NA	NA	NA	NA	NA	NA
reactome_WNT5A_dependent_internalization_of_FZD2_FZD5_and_ROR2_Main_Pathway	NCI_IL8_and_CXCR1_mediated_signaling_events_Pathway_(basophil_degranulation)	NA	NA	NA	NA	NA	NA	NA	NA	NA	NA	NA	NA	NA
reactome_WNT5A_dependent_internalization_of_FZD4_Main_Pathway	NCI_IL8_and_CXCR1_mediated_signaling_events_Pathway_(cAMP_biosynthetic_process)	NA	NA	NA	NA	NA	NA	NA	NA	NA	NA	NA	NA	NA
NA	NCI_IL8_and_CXCR2_mediated_signaling_events_Main_Pathway	NA	NA	NA	NA	NA	NA	NA	NA	NA	NA	NA	NA	NA
NA	NCI_IL8_and_CXCR2_mediated_signaling_events_Pathway_(cAMP_biosynthetic_process)	NA	NA	NA	NA	NA	NA	NA	NA	NA	NA	NA	NA	NA
NA	NCI_IL8_and_CXCR2_mediated_signaling_events_Pathway_(Pathway_degradation_of_CXCL8)	NA	NA	NA	NA	NA	NA	NA	NA	NA	NA	NA	NA	NA
NA	NCI_Insulin_Pathway_Main_Pathway	NA	NA	NA	NA	NA	NA	NA	NA	NA	NA	NA	NA	NA
NA	NCI_Integrin_linked_kinase_signaling_Pathway_(centrosome_localization)	NA	NA	NA	NA	NA	NA	NA	NA	NA	NA	NA	NA	NA
NA	NCI_Integrin_linked_kinase_signaling_Pathway_(DNA_biosynthetic_process)	NA	NA	NA	NA	NA	NA	NA	NA	NA	NA	NA	NA	NA
NA	NCI_Lissencephaly_gene_LIS1_in_neuronal_migration_and_development_Main_Pathway	NA	NA	NA	NA	NA	NA	NA	NA	NA	NA	NA	NA	NA
NA	NCI_LPA4_mediated_signaling_events_Main_Pathway	NA	NA	NA	NA	NA	NA	NA	NA	NA	NA	NA	NA	NA
NA	NCI_LPA4_mediated_signaling_events_Pathway_(cAMP_biosynthetic_process)	NA	NA	NA	NA	NA	NA	NA	NA	NA	NA	NA	NA	NA
NA	NCI_mTOR_signaling_Pathway_(translational_initiation)	NA	NA	NA	NA	NA	NA	NA	NA	NA	NA	NA	NA	NA
NA	NCI_N_cadherin_signaling_events_Pathway_(axonogenesis)	NA	NA	NA	NA	NA	NA	NA	NA	NA	NA	NA	NA	NA
NA	NCI_Nectin_adhesion_Pathway_(positive_regulation_of_lamellipodium_assembly)	NA	NA	NA	NA	NA	NA	NA	NA	NA	NA	NA	NA	NA
NA	NCI_Nephrin_Neph1_signaling_in_the_kidney_podocyte_Pathway_(apoptosis)	NA	NA	NA	NA	NA	NA	NA	NA	NA	NA	NA	NA	NA
NA	NCI_Noncanonical_Wnt_signaling_Main_Pathway	NA	NA	NA	NA	NA	NA	NA	NA	NA	NA	NA	NA	NA
NA	NCI_Nongenotropic_Androgen_signaling_Main_Pathway	NA	NA	NA	NA	NA	NA	NA	NA	NA	NA	NA	NA	NA
NA	NCI_Nongenotropic_Androgen_signaling_Pathway_(apoptosis)	NA	NA	NA	NA	NA	NA	NA	NA	NA	NA	NA	NA	NA
NA	NCI_Notch_mediated_HES_HEY_network_Main_Pathway	NA	NA	NA	NA	NA	NA	NA	NA	NA	NA	NA	NA	NA
NA	NCI_p38_MAPK_signaling_Main_Pathway	NA	NA	NA	NA	NA	NA	NA	NA	NA	NA	NA	NA	NA
NA	NCI_p75_NTR_mediated_signaling_Pathway_(neuron_apoptosis)	NA	NA	NA	NA	NA	NA	NA	NA	NA	NA	NA	NA	NA
NA	NCI_PAR4_mediated_thrombin_signaling_events_Main_Pathway	NA	NA	NA	NA	NA	NA	NA	NA	NA	NA	NA	NA	NA
NA	NCI_PDGF_receptor_signaling_network_Main_Pathway	NA	NA	NA	NA	NA	NA	NA	NA	NA	NA	NA	NA	NA
NA	NCI_PDGF_receptor_signaling_network_Pathway_(platelet_derived_growth_factor_receptor_signaling_pathway)	NA	NA	NA	NA	NA	NA	NA	NA	NA	NA	NA	NA	NA
NA	NCI_PDGFR_alpha_signaling_Main_Pathway	NA	NA	NA	NA	NA	NA	NA	NA	NA	NA	NA	NA	NA
NA	NCI_PDGFR_alpha_signaling_Pathway_(JAK_STAT_cascade)	NA	NA	NA	NA	NA	NA	NA	NA	NA	NA	NA	NA	NA
NA	NCI_PDGFR_alpha_signaling_Pathway_(positive_regulation_of_JUN_kinase_activity)	NA	NA	NA	NA	NA	NA	NA	NA	NA	NA	NA	NA	NA
NA	NCI_PDGFR_alpha_signaling_Pathway_(Ras_protein_signal_transduction)	NA	NA	NA	NA	NA	NA	NA	NA	NA	NA	NA	NA	NA
NA	NCI_PDGFR_beta_signaling_Pathway_(actin_cytoskeleton_organization)	NA	NA	NA	NA	NA	NA	NA	NA	NA	NA	NA	NA	NA
NA	NCI_PDGFR_beta_signaling_Pathway_(receptor_recycling)	NA	NA	NA	NA	NA	NA	NA	NA	NA	NA	NA	NA	NA
NA	NCI_PLK1_signaling_events_Main_Pathway	NA	NA	NA	NA	NA	NA	NA	NA	NA	NA	NA	NA	NA
NA	NCI_PLK1_signaling_events_Pathway_(chromosome_segregation)	NA	NA	NA	NA	NA	NA	NA	NA	NA	NA	NA	NA	NA
NA	NCI_PLK1_signaling_events_Pathway_(cytokinesis)	NA	NA	NA	NA	NA	NA	NA	NA	NA	NA	NA	NA	NA
NA	NCI_PLK1_signaling_events_Pathway_(G2_M_transition_of_mitotic_cell_cycle)	NA	NA	NA	NA	NA	NA	NA	NA	NA	NA	NA	NA	NA
NA	NCI_PLK1_signaling_events_Pathway_(Golgi_organization)	NA	NA	NA	NA	NA	NA	NA	NA	NA	NA	NA	NA	NA
NA	NCI_PLK1_signaling_events_Pathway_(metaphase_plate_congression)	NA	NA	NA	NA	NA	NA	NA	NA	NA	NA	NA	NA	NA
NA	NCI_PLK1_signaling_events_Pathway_(microtubule_cytoskeleton_organization)	NA	NA	NA	NA	NA	NA	NA	NA	NA	NA	NA	NA	NA
NA	NCI_PLK1_signaling_events_Pathway_(positive_regulation_of_microtubule_depolymerization)	NA	NA	NA	NA	NA	NA	NA	NA	NA	NA	NA	NA	NA
NA	NCI_PLK1_signaling_events_Pathway_(proteasomal_ubiquitin_dependent_protein_catabolic_process)	NA	NA	NA	NA	NA	NA	NA	NA	NA	NA	NA	NA	NA
NA	NCI_PLK1_signaling_events_Pathway_(regulation_of_attachment_of_spindle_microtubules_to_kinetochore)	NA	NA	NA	NA	NA	NA	NA	NA	NA	NA	NA	NA	NA
NA	NCI_PLK1_signaling_events_Pathway_(regulation_of_centriole_centriole_cohesion)	NA	NA	NA	NA	NA	NA	NA	NA	NA	NA	NA	NA	NA
NA	NCI_PLK1_signaling_events_Pathway_(regulation_of_mitotic_centrosome_separation)	NA	NA	NA	NA	NA	NA	NA	NA	NA	NA	NA	NA	NA
NA	NCI_PLK1_signaling_events_Pathway_(spindle_assembly)	NA	NA	NA	NA	NA	NA	NA	NA	NA	NA	NA	NA	NA
NA	NCI_PLK1_signaling_events_Pathway_(spindle_elongation)	NA	NA	NA	NA	NA	NA	NA	NA	NA	NA	NA	NA	NA
NA	NCI_PLK1_signaling_events_Pathway_(spindle_stabilization)	NA	NA	NA	NA	NA	NA	NA	NA	NA	NA	NA	NA	NA
NA	NCI_PLK2_and_PLK4_events_Main_Pathway	NA	NA	NA	NA	NA	NA	NA	NA	NA	NA	NA	NA	NA
NA	NCI_PLK2_and_PLK4_events_Pathway_(regulation_of_centriole_replication)	NA	NA	NA	NA	NA	NA	NA	NA	NA	NA	NA	NA	NA
NA	NCI_Proteoglycan_syndecan_mediated_signaling_events_Main_Pathway	NA	NA	NA	NA	NA	NA	NA	NA	NA	NA	NA	NA	NA
NA	NCI_RAC1_signaling_Pathway_(neuron_projection_development)	NA	NA	NA	NA	NA	NA	NA	NA	NA	NA	NA	NA	NA
NA	NCI_RAC1_signaling_Pathway_(regulation_of_cell_cycle)	NA	NA	NA	NA	NA	NA	NA	NA	NA	NA	NA	NA	NA
NA	NCI_Reelin_signaling_Main_Pathway	NA	NA	NA	NA	NA	NA	NA	NA	NA	NA	NA	NA	NA
NA	NCI_Reelin_signaling_Pathway_(long_term_memory)	NA	NA	NA	NA	NA	NA	NA	NA	NA	NA	NA	NA	NA
NA	NCI_Reelin_signaling_Pathway_(neuron_migration)	NA	NA	NA	NA	NA	NA	NA	NA	NA	NA	NA	NA	NA
NA	NCI_Regulation_of_Androgen_receptor_activity_Pathway_(Pathway_positive_regulation_of_transcription_via_GATA2)	NA	NA	NA	NA	NA	NA	NA	NA	NA	NA	NA	NA	NA
NA	NCI_Regulation_of_cytoplasmic_and_nuclear_SMAD2_3_signaling_Main_Pathway	NA	NA	NA	NA	NA	NA	NA	NA	NA	NA	NA	NA	NA
NA	NCI_Regulation_of_nuclear_SMAD2_3_signaling_Main_Pathway	NA	NA	NA	NA	NA	NA	NA	NA	NA	NA	NA	NA	NA
NA	NCI_Regulation_of_nuclear_SMAD2_3_signaling_Pathway_(muscle_cell_differentiation)	NA	NA	NA	NA	NA	NA	NA	NA	NA	NA	NA	NA	NA
NA	NCI_Regulation_of_nuclear_SMAD2_3_signaling_Pathway_(negative_regulation_of_cell_growth)	NA	NA	NA	NA	NA	NA	NA	NA	NA	NA	NA	NA	NA
NA	NCI_Regulation_of_nuclear_SMAD2_3_signaling_Pathway_(Pathway_degradation_of_SMAD3)	NA	NA	NA	NA	NA	NA	NA	NA	NA	NA	NA	NA	NA
NA	NCI_Regulation_of_retinoblastoma_protein_Main_Pathway	NA	NA	NA	NA	NA	NA	NA	NA	NA	NA	NA	NA	NA
NA	NCI_Regulation_of_retinoblastoma_protein_Pathway_(erythrocyte_differentiation)	NA	NA	NA	NA	NA	NA	NA	NA	NA	NA	NA	NA	NA
NA	NCI_Regulation_of_retinoblastoma_protein_Pathway_(histone_methylation)	NA	NA	NA	NA	NA	NA	NA	NA	NA	NA	NA	NA	NA
NA	NCI_Regulation_of_retinoblastoma_protein_Pathway_(Pathway_rRNA_transcription_via_RB1)	NA	NA	NA	NA	NA	NA	NA	NA	NA	NA	NA	NA	NA
NA	NCI_Regulation_of_retinoblastoma_protein_Pathway_(proteasomal_ubiquitin_dependent_protein_catabolic_process)	NA	NA	NA	NA	NA	NA	NA	NA	NA	NA	NA	NA	NA
NA	NCI_Regulation_of_Telomerase_Main_Pathway	NA	NA	NA	NA	NA	NA	NA	NA	NA	NA	NA	NA	NA
NA	NCI_Retinoic_acid_receptors_mediated_signaling_Main_Pathway	NA	NA	NA	NA	NA	NA	NA	NA	NA	NA	NA	NA	NA
NA	NCI_Retinoic_acid_receptors_mediated_signaling_Pathway_(proteasomal_ubiquitin_dependent_protein_catabolic_process)	NA	NA	NA	NA	NA	NA	NA	NA	NA	NA	NA	NA	NA
NA	NCI_RhoA_signaling_Pathway_(Golgi_organization)	NA	NA	NA	NA	NA	NA	NA	NA	NA	NA	NA	NA	NA
NA	NCI_Role_of_Calcineurin_dependent_NFAT_signaling_in_lymphocytes_Main_Pathway	NA	NA	NA	NA	NA	NA	NA	NA	NA	NA	NA	NA	NA
NA	NCI_RXR_and_RAR_heterodimerization_with_other_nuclear_receptor_Main_Pathway	NA	NA	NA	NA	NA	NA	NA	NA	NA	NA	NA	NA	NA
NA	NCI_Signaling_events_mediated_by_HDAC_Class_I_Main_Pathway	NA	NA	NA	NA	NA	NA	NA	NA	NA	NA	NA	NA	NA
NA	NCI_Signaling_events_mediated_by_HDAC_Class_I_Pathway_(histone_deacetylation)	NA	NA	NA	NA	NA	NA	NA	NA	NA	NA	NA	NA	NA
NA	NCI_Signaling_events_mediated_by_Hepatocyte_Growth_Factor_Receptor_c_Met__Main_Pathway	NA	NA	NA	NA	NA	NA	NA	NA	NA	NA	NA	NA	NA
NA	NCI_Signaling_events_mediated_by_Hepatocyte_Growth_Factor_Receptor_c_Met__Pathway_(apoptosis)	NA	NA	NA	NA	NA	NA	NA	NA	NA	NA	NA	NA	NA
NA	NCI_Signaling_events_mediated_by_Hepatocyte_Growth_Factor_Receptor_c_Met__Pathway_(Pathway_positive_regulation_of_NF_kappaB_transcription_factor_activity_via_RAF1)	NA	NA	NA	NA	NA	NA	NA	NA	NA	NA	NA	NA	NA
NA	NCI_Signaling_events_mediated_by_Hepatocyte_Growth_Factor_Receptor_c_Met__Pathway_(positive_regulation_of_tyrosine_phosphorylation_of_STAT_protein)	NA	NA	NA	NA	NA	NA	NA	NA	NA	NA	NA	NA	NA
NA	NCI_Signaling_events_mediated_by_Hepatocyte_Growth_Factor_Receptor_c_Met__Pathway_(translational_initiation)	NA	NA	NA	NA	NA	NA	NA	NA	NA	NA	NA	NA	NA
NA	NCI_Signaling_events_mediated_by_PRL_Main_Pathway	NA	NA	NA	NA	NA	NA	NA	NA	NA	NA	NA	NA	NA
NA	NCI_Signaling_events_mediated_by_TCPTP_Main_Pathway	NA	NA	NA	NA	NA	NA	NA	NA	NA	NA	NA	NA	NA
NA	NCI_Signaling_events_mediated_by_TCPTP_Pathway_(G1_S_transition_of_mitotic_cell_cycle)	NA	NA	NA	NA	NA	NA	NA	NA	NA	NA	NA	NA	NA
NA	NCI_Signaling_events_mediated_by_TCPTP_Pathway_(macrophage_differentiation)	NA	NA	NA	NA	NA	NA	NA	NA	NA	NA	NA	NA	NA
NA	NCI_Signaling_events_mediated_by_TCPTP_Pathway_(MAPKKK_cascade)	NA	NA	NA	NA	NA	NA	NA	NA	NA	NA	NA	NA	NA
NA	NCI_Signaling_events_mediated_by_TCPTP_Pathway_(positive_regulation_of_S_phase_of_mitotic_cell_cycle)	NA	NA	NA	NA	NA	NA	NA	NA	NA	NA	NA	NA	NA
NA	NCI_Signaling_events_mediated_by_TCPTP_Pathway_(regulation_of_gluconeogenesis)	NA	NA	NA	NA	NA	NA	NA	NA	NA	NA	NA	NA	NA
NA	NCI_Signaling_events_mediated_by_the_Hedgehog_family_Main_Pathway	NA	NA	NA	NA	NA	NA	NA	NA	NA	NA	NA	NA	NA
NA	NCI_Signaling_events_mediated_by_the_Hedgehog_family_Pathway_(catabolic_process)	NA	NA	NA	NA	NA	NA	NA	NA	NA	NA	NA	NA	NA
NA	NCI_Signaling_events_mediated_by_the_Hedgehog_family_Pathway_(determination_of_left_right_symmetry)	NA	NA	NA	NA	NA	NA	NA	NA	NA	NA	NA	NA	NA
NA	NCI_Signaling_events_mediated_by_the_Hedgehog_family_Pathway_(heart_development)	NA	NA	NA	NA	NA	NA	NA	NA	NA	NA	NA	NA	NA
NA	NCI_Signaling_events_mediated_by_the_Hedgehog_family_Pathway_(heart_looping)	NA	NA	NA	NA	NA	NA	NA	NA	NA	NA	NA	NA	NA
NA	NCI_Signaling_events_mediated_by_the_Hedgehog_family_Pathway_(pancreas_development)	NA	NA	NA	NA	NA	NA	NA	NA	NA	NA	NA	NA	NA
NA	NCI_Signaling_events_mediated_by_the_Hedgehog_family_Pathway_(somite_specification)	NA	NA	NA	NA	NA	NA	NA	NA	NA	NA	NA	NA	NA
NA	NCI_Signaling_events_mediated_by_VEGFR1_and_VEGFR2_Pathway_(Pathway_degradation_of_AKAP1)	NA	NA	NA	NA	NA	NA	NA	NA	NA	NA	NA	NA	NA
NA	NCI_Signaling_mediated_by_p38_gamma_and_p38_delta_Main_Pathway	NA	NA	NA	NA	NA	NA	NA	NA	NA	NA	NA	NA	NA
NA	NCI_Signaling_mediated_by_p38_gamma_and_p38_delta_Pathway_(G2_M_transition_checkpoint)	NA	NA	NA	NA	NA	NA	NA	NA	NA	NA	NA	NA	NA
NA	NCI_Sumoylation_by_RanBP2_regulates_transcriptional_repression_Main_Pathway	NA	NA	NA	NA	NA	NA	NA	NA	NA	NA	NA	NA	NA
NA	NCI_Syndecan_3_mediated_signaling_events_Main_Pathway	NA	NA	NA	NA	NA	NA	NA	NA	NA	NA	NA	NA	NA
NA	NCI_Syndecan_4_mediated_signaling_events_Main_Pathway	NA	NA	NA	NA	NA	NA	NA	NA	NA	NA	NA	NA	NA
NA	NCI_Thromboxane_A2_receptor_signaling_Main_Pathway	NA	NA	NA	NA	NA	NA	NA	NA	NA	NA	NA	NA	NA
NA	NCI_Thromboxane_A2_receptor_signaling_Pathway_(cAMP_biosynthetic_process)	NA	NA	NA	NA	NA	NA	NA	NA	NA	NA	NA	NA	NA
NA	NCI_Thromboxane_A2_receptor_signaling_Pathway_(JNK_cascade)	NA	NA	NA	NA	NA	NA	NA	NA	NA	NA	NA	NA	NA
NA	NCI_Thromboxane_A2_receptor_signaling_Pathway_(platelet_activation)	NA	NA	NA	NA	NA	NA	NA	NA	NA	NA	NA	NA	NA
NA	NCI_TRAIL_signaling_Main_Pathway	NA	NA	NA	NA	NA	NA	NA	NA	NA	NA	NA	NA	NA
NA	NCI_Trk_receptor_signaling_mediated_by_PI3K_and_PLC_gamma_Pathway_(regulation_of_long_term_neuronal_synaptic_plasticity)	NA	NA	NA	NA	NA	NA	NA	NA	NA	NA	NA	NA	NA
NA	NCI_Trk_receptor_signaling_mediated_by_the_MAPK_Main_Pathway	NA	NA	NA	NA	NA	NA	NA	NA	NA	NA	NA	NA	NA
NA	NCI_Trk_receptor_signaling_mediated_by_the_MAPK_Pathway_(neuron_apoptosis)	NA	NA	NA	NA	NA	NA	NA	NA	NA	NA	NA	NA	NA
NA	NCI_Validated_nuclear_estrogen_receptor_beta_network_Main_Pathway	NA	NA	NA	NA	NA	NA	NA	NA	NA	NA	NA	NA	NA
NA	NCI_Validated_targets_of_C_MYC_transcriptional_activation_Main_Pathway	NA	NA	NA	NA	NA	NA	NA	NA	NA	NA	NA	NA	NA
NA	NCI_Validated_targets_of_C_MYC_transcriptional_activation_Pathway_(Pathway_rRNA_transcription_via_MAX)	NA	NA	NA	NA	NA	NA	NA	NA	NA	NA	NA	NA	NA
NA	NCI_Validated_targets_of_C_MYC_transcriptional_repression_Main_Pathway	NA	NA	NA	NA	NA	NA	NA	NA	NA	NA	NA	NA	NA
NA	NCI_Validated_targets_of_C_MYC_transcriptional_repression_Pathway_(cell_cycle_arrest)	NA	NA	NA	NA	NA	NA	NA	NA	NA	NA	NA	NA	NA
NA	NCI_Validated_transcriptional_targets_of_AP1_family_members_Fra1_and_Fra2_Main_Pathway	NA	NA	NA	NA	NA	NA	NA	NA	NA	NA	NA	NA	NA
NA	NGF_Pathway_Neuronal_Survival	NA	NA	NA	NA	NA	NA	NA	NA	NA	NA	NA	NA	NA
NA	p53_Signaling_Pathway	NA	NA	NA	NA	NA	NA	NA	NA	NA	NA	NA	NA	NA
NA	p53_Signaling_Pathway_Apoptosis	NA	NA	NA	NA	NA	NA	NA	NA	NA	NA	NA	NA	NA
NA	p53_Signaling_Pathway_Breast_Cancer	NA	NA	NA	NA	NA	NA	NA	NA	NA	NA	NA	NA	NA
NA	p53_Signaling_Pathway_Cancer	NA	NA	NA	NA	NA	NA	NA	NA	NA	NA	NA	NA	NA
NA	p53_Signaling_Pathway_Cell_Cycle_Arrest	NA	NA	NA	NA	NA	NA	NA	NA	NA	NA	NA	NA	NA
NA	p53_Signaling_Pathway_Cell_Growth_Accumulation	NA	NA	NA	NA	NA	NA	NA	NA	NA	NA	NA	NA	NA
NA	p53_Signaling_Pathway_DNA_Repair	NA	NA	NA	NA	NA	NA	NA	NA	NA	NA	NA	NA	NA
NA	p53_Signaling_Pathway_Exosome_Mediated_Secretion	NA	NA	NA	NA	NA	NA	NA	NA	NA	NA	NA	NA	NA
NA	p53_Signaling_Pathway_Gene_Expression_Anti-Apoptosis_via_TP53	NA	NA	NA	NA	NA	NA	NA	NA	NA	NA	NA	NA	NA
NA	p53_Signaling_Pathway_Gene_Expression_Cell_Cycle_and_Cell_Growth_via_TP53	NA	NA	NA	NA	NA	NA	NA	NA	NA	NA	NA	NA	NA
NA	p53_Signaling_Pathway_Gene_Expression_Cell_Fate_and_Development_via_TP53	NA	NA	NA	NA	NA	NA	NA	NA	NA	NA	NA	NA	NA
NA	p53_Signaling_Pathway_Gene_Expression_Cell_Signaling_via_TP53	NA	NA	NA	NA	NA	NA	NA	NA	NA	NA	NA	NA	NA
NA	p53_Signaling_Pathway_Gene_Expression_DNA_Replication_and_Repair_via_TP53	NA	NA	NA	NA	NA	NA	NA	NA	NA	NA	NA	NA	NA
NA	p53_Signaling_Pathway_Gene_Expression_ECM_and_Adhesion_via_TP53	NA	NA	NA	NA	NA	NA	NA	NA	NA	NA	NA	NA	NA
NA	p53_Signaling_Pathway_Gene_Expression_Infection_and_Immune_Response_via_TP53	NA	NA	NA	NA	NA	NA	NA	NA	NA	NA	NA	NA	NA
NA	p53_Signaling_Pathway_Inhibition_of_Angiogenesis_and_Metastasis	NA	NA	NA	NA	NA	NA	NA	NA	NA	NA	NA	NA	NA
NA	p53_Signaling_Pathway_Normal_Cell_Cycle_Progression	NA	NA	NA	NA	NA	NA	NA	NA	NA	NA	NA	NA	NA
NA	PPAR_Pathway	NA	NA	NA	NA	NA	NA	NA	NA	NA	NA	NA	NA	NA
NA	PPAR_Pathway_Adipocyte_Differentiation_Glucose_Homeostasis_and_Macrophage_Function	NA	NA	NA	NA	NA	NA	NA	NA	NA	NA	NA	NA	NA
NA	PPAR_Pathway_Fatty_Acid_Metabolism_Lipid_Homeostasis_and_Skin_Proliferation	NA	NA	NA	NA	NA	NA	NA	NA	NA	NA	NA	NA	NA
NA	PPAR_Pathway_Peroxisome_Proliferation_Hepatocarcinogenesis_Fatty_Acid_Metbolism_and_Lipid_Homeostasis	NA	NA	NA	NA	NA	NA	NA	NA	NA	NA	NA	NA	NA
NA	PTEN_Pathway_Cell_Cycle	NA	NA	NA	NA	NA	NA	NA	NA	NA	NA	NA	NA	NA
NA	PTEN_Pathway_Differentiation	NA	NA	NA	NA	NA	NA	NA	NA	NA	NA	NA	NA	NA
NA	PTEN_Pathway_DNA_Repair	NA	NA	NA	NA	NA	NA	NA	NA	NA	NA	NA	NA	NA
NA	PTEN_Pathway_Genomic_Stability	NA	NA	NA	NA	NA	NA	NA	NA	NA	NA	NA	NA	NA
NA	PTEN_Pathway_Growth	NA	NA	NA	NA	NA	NA	NA	NA	NA	NA	NA	NA	NA
NA	RANK_Signaling_in_Osteoclasts_Pathway_Inhibition_of_Death	NA	NA	NA	NA	NA	NA	NA	NA	NA	NA	NA	NA	NA
NA	Ras_Pathway_Gene_Expression_Cell_Proliferation_Cell_Survival_Differentiation_Development_Cell_Cycle_Control_Cell_Motility_Tumorigenesis_via_ELK4_ATF2_MEF2D_STAT2_CREB3_CCNA1_MYC_ELK1_JUN_CDK4	NA	NA	NA	NA	NA	NA	NA	NA	NA	NA	NA	NA	NA
NA	Ras_Pathway_Receptor_Endocytosis	NA	NA	NA	NA	NA	NA	NA	NA	NA	NA	NA	NA	NA
NA	reactome_2_LTR_circle_formation_Main_Pathway	NA	NA	NA	NA	NA	NA	NA	NA	NA	NA	NA	NA	NA
NA	reactome_A_tetrasaccharide_linker_sequence_is_required_for_GAG_synthesis_Main_Pathway	NA	NA	NA	NA	NA	NA	NA	NA	NA	NA	NA	NA	NA
NA	reactome_ABC_family_proteins_mediated_transport_Main_Pathway	NA	NA	NA	NA	NA	NA	NA	NA	NA	NA	NA	NA	NA
NA	reactome_Abnormal_metabolism_in_phenylketonuria_Main_Pathway	NA	NA	NA	NA	NA	NA	NA	NA	NA	NA	NA	NA	NA
NA	reactome_Abortive_elongation_of_HIV_1_transcript_in_the_absence_of_Tat_Main_Pathway	NA	NA	NA	NA	NA	NA	NA	NA	NA	NA	NA	NA	NA
NA	reactome_Acetylcholine_regulates_insulin_secretion_Main_Pathway	NA	NA	NA	NA	NA	NA	NA	NA	NA	NA	NA	NA	NA
NA	reactome_activated_TAK1_mediates_p38_MAPK_activation_Main_Pathway	NA	NA	NA	NA	NA	NA	NA	NA	NA	NA	NA	NA	NA
NA	reactome_Activation_of_ATR_in_response_to_replication_stress_Main_Pathway	NA	NA	NA	NA	NA	NA	NA	NA	NA	NA	NA	NA	NA
NA	reactome_Activation_of_BIM_and_translocation_to_mitochondria_Main_Pathway	NA	NA	NA	NA	NA	NA	NA	NA	NA	NA	NA	NA	NA
NA	reactome_Activation_of_DNA_fragmentation_factor_Main_Pathway	NA	NA	NA	NA	NA	NA	NA	NA	NA	NA	NA	NA	NA
NA	reactome_Activation_of_gene_expression_by_SREBF_SREBP__Main_Pathway	NA	NA	NA	NA	NA	NA	NA	NA	NA	NA	NA	NA	NA
NA	reactome_Activation_of_NIMA_Kinases_NEK9_NEK6_NEK7_Main_Pathway	NA	NA	NA	NA	NA	NA	NA	NA	NA	NA	NA	NA	NA
NA	reactome_Activation_of_NOXA_and_translocation_to_mitochondria_Main_Pathway	NA	NA	NA	NA	NA	NA	NA	NA	NA	NA	NA	NA	NA
NA	reactome_Activation_of_PUMA_and_translocation_to_mitochondria_Main_Pathway	NA	NA	NA	NA	NA	NA	NA	NA	NA	NA	NA	NA	NA
NA	reactome_Activation_of_Rac_Main_Pathway	NA	NA	NA	NA	NA	NA	NA	NA	NA	NA	NA	NA	NA
NA	reactome_Activation_of_the_pre_replicative_complex_Main_Pathway	NA	NA	NA	NA	NA	NA	NA	NA	NA	NA	NA	NA	NA
NA	reactome_Acyl_chain_remodelling_of_PE_Main_Pathway	NA	NA	NA	NA	NA	NA	NA	NA	NA	NA	NA	NA	NA
NA	reactome_Acyl_chain_remodelling_of_PS_Main_Pathway	NA	NA	NA	NA	NA	NA	NA	NA	NA	NA	NA	NA	NA
NA	reactome_Adenylate_cyclase_activating_Main_Pathway	NA	NA	NA	NA	NA	NA	NA	NA	NA	NA	NA	NA	NA
NA	reactome_Advanced_glycosylation_endproduct_receptor_signaling_Main_Pathway	NA	NA	NA	NA	NA	NA	NA	NA	NA	NA	NA	NA	NA
NA	reactome_AKT_phosphorylates_targets_in_the_cytosol_Main_Pathway	NA	NA	NA	NA	NA	NA	NA	NA	NA	NA	NA	NA	NA
NA	reactome_AKT_phosphorylates_targets_in_the_nucleus_Main_Pathway	NA	NA	NA	NA	NA	NA	NA	NA	NA	NA	NA	NA	NA
NA	reactome_alpha_linolenic_acid_ALA_metabolism_Main_Pathway	NA	NA	NA	NA	NA	NA	NA	NA	NA	NA	NA	NA	NA
NA	reactome_Amino_acid_synthesis_and_interconversion_transamination__Main_Pathway	NA	NA	NA	NA	NA	NA	NA	NA	NA	NA	NA	NA	NA
NA	reactome_Amyloids_Main_Pathway	NA	NA	NA	NA	NA	NA	NA	NA	NA	NA	NA	NA	NA
NA	reactome_APC_C_Cdc20_mediated_degradation_of_Cyclin_B_Main_Pathway	NA	NA	NA	NA	NA	NA	NA	NA	NA	NA	NA	NA	NA
NA	reactome_APC_C_Cdc20_mediated_degradation_of_mitotic_proteins_Main_Pathway	NA	NA	NA	NA	NA	NA	NA	NA	NA	NA	NA	NA	NA
NA	reactome_APC_C_Cdh1_mediated_degradation_of_Cdc20_and_other_APC_C_Cdh1_targeted_proteins_in_late_mitosis_early_G1_Main_Pathway	NA	NA	NA	NA	NA	NA	NA	NA	NA	NA	NA	NA	NA
NA	reactome_APC_Cdc20_mediated_degradation_of_Nek2A_Main_Pathway	NA	NA	NA	NA	NA	NA	NA	NA	NA	NA	NA	NA	NA
NA	reactome_APOBEC3G_mediated_resistance_to_HIV_1_infection_Main_Pathway	NA	NA	NA	NA	NA	NA	NA	NA	NA	NA	NA	NA	NA
NA	reactome_Apoptotic_cleavage_of_cellular_proteins_Main_Pathway	NA	NA	NA	NA	NA	NA	NA	NA	NA	NA	NA	NA	NA
NA	reactome_Assembly_of_the_ORC_complex_at_the_origin_of_replication_Main_Pathway	NA	NA	NA	NA	NA	NA	NA	NA	NA	NA	NA	NA	NA
NA	reactome_Assembly_of_the_RAD50_MRE11_NBS1_complex_at_DNA_double_strand_breaks_Main_Pathway	NA	NA	NA	NA	NA	NA	NA	NA	NA	NA	NA	NA	NA
NA	reactome_Assembly_of_the_RAD51_ssDNA_nucleoprotein_complex_Main_Pathway	NA	NA	NA	NA	NA	NA	NA	NA	NA	NA	NA	NA	NA
NA	reactome_Association_of_TriC_CCT_with_target_proteins_during_biosynthesis_Main_Pathway	NA	NA	NA	NA	NA	NA	NA	NA	NA	NA	NA	NA	NA
NA	reactome_Astrocytic_Glutamate_Glutamine_Uptake_And_Metabolism_Main_Pathway	NA	NA	NA	NA	NA	NA	NA	NA	NA	NA	NA	NA	NA
NA	reactome_ATM_mediated_phosphorylation_of_repair_proteins_Main_Pathway	NA	NA	NA	NA	NA	NA	NA	NA	NA	NA	NA	NA	NA
NA	reactome_ATP_sensitive_Potassium_channels_Main_Pathway	NA	NA	NA	NA	NA	NA	NA	NA	NA	NA	NA	NA	NA
NA	reactome_Attenuation_phase_Main_Pathway	NA	NA	NA	NA	NA	NA	NA	NA	NA	NA	NA	NA	NA
NA	reactome_Autointegration_results_in_viral_DNA_circles_Main_Pathway	NA	NA	NA	NA	NA	NA	NA	NA	NA	NA	NA	NA	NA
NA	reactome_Beta_oxidation_of_butanoyl_CoA_to_acetyl_CoA_Main_Pathway	NA	NA	NA	NA	NA	NA	NA	NA	NA	NA	NA	NA	NA
NA	reactome_Beta_oxidation_of_decanoyl_CoA_to_octanoyl_CoA_CoA_Main_Pathway	NA	NA	NA	NA	NA	NA	NA	NA	NA	NA	NA	NA	NA
NA	reactome_Beta_oxidation_of_hexanoyl_CoA_to_butanoyl_CoA_Main_Pathway	NA	NA	NA	NA	NA	NA	NA	NA	NA	NA	NA	NA	NA
NA	reactome_Beta_oxidation_of_octanoyl_CoA_to_hexanoyl_CoA_Main_Pathway	NA	NA	NA	NA	NA	NA	NA	NA	NA	NA	NA	NA	NA
NA	reactome_Beta_oxidation_of_pristanoyl_CoA_Main_Pathway	NA	NA	NA	NA	NA	NA	NA	NA	NA	NA	NA	NA	NA
NA	reactome_BH3_only_proteins_associate_with_and_inactivate_anti_apoptotic_BCL_2_members_Main_Pathway	NA	NA	NA	NA	NA	NA	NA	NA	NA	NA	NA	NA	NA
NA	reactome_Bicarbonate_transporters_Main_Pathway	NA	NA	NA	NA	NA	NA	NA	NA	NA	NA	NA	NA	NA
NA	reactome_Biosynthesis_of_the_N_glycan_precursor_dolichol_lipid_linked_oligosaccharide_LLO_and_transfer_to_a_nascent_protein_Main_Pathway	NA	NA	NA	NA	NA	NA	NA	NA	NA	NA	NA	NA	NA
NA	reactome_Biotin_transport_and_metabolism_Main_Pathway	NA	NA	NA	NA	NA	NA	NA	NA	NA	NA	NA	NA	NA
NA	reactome_Butyrate_Response_Factor_1_BRF1_destabilizes_mRNA_Main_Pathway	NA	NA	NA	NA	NA	NA	NA	NA	NA	NA	NA	NA	NA
NA	reactome_Calmodulin_induced_events_Main_Pathway	NA	NA	NA	NA	NA	NA	NA	NA	NA	NA	NA	NA	NA
NA	reactome_CaMK_IV_mediated_phosphorylation_of_CREB_Main_Pathway	NA	NA	NA	NA	NA	NA	NA	NA	NA	NA	NA	NA	NA
NA	reactome_Carnitine_synthesis_Main_Pathway	NA	NA	NA	NA	NA	NA	NA	NA	NA	NA	NA	NA	NA
NA	reactome_Cdc20_Phospho_APC_C_mediated_degradation_of_Cyclin_A_Main_Pathway	NA	NA	NA	NA	NA	NA	NA	NA	NA	NA	NA	NA	NA
NA	reactome_CDC6_association_with_the_ORC_origin_complex_Main_Pathway	NA	NA	NA	NA	NA	NA	NA	NA	NA	NA	NA	NA	NA
NA	reactome_CDT1_association_with_the_CDC6_ORC_origin_complex_Main_Pathway	NA	NA	NA	NA	NA	NA	NA	NA	NA	NA	NA	NA	NA
NA	reactome_cell_division_Main_Pathway	NA	NA	NA	NA	NA	NA	NA	NA	NA	NA	NA	NA	NA
NA	reactome_Chk1_Chk2_Cds1_mediated_inactivation_of_Cyclin_B_Cdk1_complex_Main_Pathway	NA	NA	NA	NA	NA	NA	NA	NA	NA	NA	NA	NA	NA
NA	reactome_CHL1_interactions_Main_Pathway	NA	NA	NA	NA	NA	NA	NA	NA	NA	NA	NA	NA	NA
NA	reactome_Cholesterol_biosynthesis_Main_Pathway	NA	NA	NA	NA	NA	NA	NA	NA	NA	NA	NA	NA	NA
NA	reactome_Chylomicron_mediated_lipid_transport_Main_Pathway	NA	NA	NA	NA	NA	NA	NA	NA	NA	NA	NA	NA	NA
NA	reactome_Clearance_of_Nuclear_Envelope_Membranes_from_Chromatin_Main_Pathway	NA	NA	NA	NA	NA	NA	NA	NA	NA	NA	NA	NA	NA
NA	reactome_Cleavage_of_Growing_Transcript_in_the_Termination_Region_Main_Pathway	NA	NA	NA	NA	NA	NA	NA	NA	NA	NA	NA	NA	NA
NA	reactome_Cleavage_of_the_damaged_purine_Main_Pathway	NA	NA	NA	NA	NA	NA	NA	NA	NA	NA	NA	NA	NA
NA	reactome_Cobalamin_Cbl_vitamin_B12_transport_and_metabolism_Main_Pathway	NA	NA	NA	NA	NA	NA	NA	NA	NA	NA	NA	NA	NA
NA	reactome_Cohesin_Loading_onto_Chromatin_Main_Pathway	NA	NA	NA	NA	NA	NA	NA	NA	NA	NA	NA	NA	NA
NA	reactome_Condensation_of_Prometaphase_Chromosomes_Main_Pathway	NA	NA	NA	NA	NA	NA	NA	NA	NA	NA	NA	NA	NA
NA	reactome_Condensation_of_Prophase_Chromosomes_Main_Pathway	NA	NA	NA	NA	NA	NA	NA	NA	NA	NA	NA	NA	NA
NA	reactome_Constitutive_Signaling_by_NOTCH1_HD_PEST_Domain_Mutants_Main_Pathway	NA	NA	NA	NA	NA	NA	NA	NA	NA	NA	NA	NA	NA
NA	reactome_Constitutive_Signaling_by_NOTCH1_PEST_Domain_Mutants_Main_Pathway	NA	NA	NA	NA	NA	NA	NA	NA	NA	NA	NA	NA	NA
NA	reactome_Conversion_from_APC_C_Cdc20_to_APC_C_Cdh1_in_late_anaphase_Main_Pathway	NA	NA	NA	NA	NA	NA	NA	NA	NA	NA	NA	NA	NA
NA	reactome_CREB_phosphorylation_Main_Pathway	NA	NA	NA	NA	NA	NA	NA	NA	NA	NA	NA	NA	NA
NA	reactome_CREB_phosphorylation_through_the_activation_of_Adenylate_Cyclase_Main_Pathway	NA	NA	NA	NA	NA	NA	NA	NA	NA	NA	NA	NA	NA
NA	reactome_CREB_phosphorylation_through_the_activation_of_CaMKK_Main_Pathway	NA	NA	NA	NA	NA	NA	NA	NA	NA	NA	NA	NA	NA
NA	reactome_CRMPs_in_Sema3A_signaling_Main_Pathway	NA	NA	NA	NA	NA	NA	NA	NA	NA	NA	NA	NA	NA
NA	reactome_Cyclin_A_B1_associated_events_during_G2_M_transition_Main_Pathway	NA	NA	NA	NA	NA	NA	NA	NA	NA	NA	NA	NA	NA
NA	reactome_Cyclin_A_Cdk2_associated_events_at_S_phase_entry_Main_Pathway	NA	NA	NA	NA	NA	NA	NA	NA	NA	NA	NA	NA	NA
NA	reactome_Cyclin_B2_mediated_events_Main_Pathway	NA	NA	NA	NA	NA	NA	NA	NA	NA	NA	NA	NA	NA
NA	reactome_Cyclin_E_associated_events_during_G1_S_transition_Main_Pathway	NA	NA	NA	NA	NA	NA	NA	NA	NA	NA	NA	NA	NA
NA	reactome_Cytosolic_iron_sulfur_cluster_assembly_Main_Pathway	NA	NA	NA	NA	NA	NA	NA	NA	NA	NA	NA	NA	NA
NA	reactome_Cytosolic_sensors_of_pathogen_associated_DNA_Main_Pathway	NA	NA	NA	NA	NA	NA	NA	NA	NA	NA	NA	NA	NA
NA	reactome_Cytosolic_tRNA_aminoacylation_Main_Pathway	NA	NA	NA	NA	NA	NA	NA	NA	NA	NA	NA	NA	NA
NA	reactome_DARPP_32_events_Main_Pathway	NA	NA	NA	NA	NA	NA	NA	NA	NA	NA	NA	NA	NA
NA	reactome_Deadenylation_of_mRNA_Main_Pathway	NA	NA	NA	NA	NA	NA	NA	NA	NA	NA	NA	NA	NA
NA	reactome_Degradation_of_cysteine_and_homocysteine_Main_Pathway	NA	NA	NA	NA	NA	NA	NA	NA	NA	NA	NA	NA	NA
NA	reactome_Depolymerisation_of_the_Nuclear_Lamina_Main_Pathway	NA	NA	NA	NA	NA	NA	NA	NA	NA	NA	NA	NA	NA
NA	reactome_Deposition_of_new_CENPA_containing_nucleosomes_at_the_centromere_Main_Pathway	NA	NA	NA	NA	NA	NA	NA	NA	NA	NA	NA	NA	NA
NA	reactome_Dimerization_of_procaspase_8_Main_Pathway	NA	NA	NA	NA	NA	NA	NA	NA	NA	NA	NA	NA	NA
NA	reactome_Displacement_of_DNA_glycosylase_by_APE1_Main_Pathway	NA	NA	NA	NA	NA	NA	NA	NA	NA	NA	NA	NA	NA
NA	reactome_DNA_Damage_Telomere_Stress_Induced_Senescence_Main_Pathway	NA	NA	NA	NA	NA	NA	NA	NA	NA	NA	NA	NA	NA
NA	reactome_DNA_replication_initiation_Main_Pathway	NA	NA	NA	NA	NA	NA	NA	NA	NA	NA	NA	NA	NA
NA	reactome_Dual_incision_reaction_in_GG_NER_Main_Pathway	NA	NA	NA	NA	NA	NA	NA	NA	NA	NA	NA	NA	NA
NA	reactome_Dual_incision_reaction_in_TC_NER_Main_Pathway	NA	NA	NA	NA	NA	NA	NA	NA	NA	NA	NA	NA	NA
NA	reactome_E2F_enabled_inhibition_of_pre_replication_complex_formation_Main_Pathway	NA	NA	NA	NA	NA	NA	NA	NA	NA	NA	NA	NA	NA
NA	reactome_E2F_mediated_regulation_of_DNA_replication_Main_Pathway	NA	NA	NA	NA	NA	NA	NA	NA	NA	NA	NA	NA	NA
NA	reactome_Early_Phase_of_HIV_Life_Cycle_Main_Pathway	NA	NA	NA	NA	NA	NA	NA	NA	NA	NA	NA	NA	NA
NA	reactome_Electric_Transmission_Across_Gap_Junctions_Main_Pathway	NA	NA	NA	NA	NA	NA	NA	NA	NA	NA	NA	NA	NA
NA	reactome_Elongation_arrest_and_recovery_Main_Pathway	NA	NA	NA	NA	NA	NA	NA	NA	NA	NA	NA	NA	NA
NA	reactome_ERK_MAPK_targets_Main_Pathway	NA	NA	NA	NA	NA	NA	NA	NA	NA	NA	NA	NA	NA
NA	reactome_ERK1_activation_Main_Pathway	NA	NA	NA	NA	NA	NA	NA	NA	NA	NA	NA	NA	NA
NA	reactome_Establishment_of_Sister_Chromatid_Cohesion_Main_Pathway	NA	NA	NA	NA	NA	NA	NA	NA	NA	NA	NA	NA	NA
NA	reactome_Eukaryotic_Translation_Elongation_Main_Pathway	NA	NA	NA	NA	NA	NA	NA	NA	NA	NA	NA	NA	NA
NA	reactome_Fanconi_Anemia_Main_Pathway	NA	NA	NA	NA	NA	NA	NA	NA	NA	NA	NA	NA	NA
NA	reactome_Fatty_Acyl_CoA_Biosynthesis_Main_Pathway	NA	NA	NA	NA	NA	NA	NA	NA	NA	NA	NA	NA	NA
NA	reactome_FGFR2b_ligand_binding_and_activation_Main_Pathway	NA	NA	NA	NA	NA	NA	NA	NA	NA	NA	NA	NA	NA
NA	reactome_Folding_of_actin_by_CCT_TriC_Main_Pathway	NA	NA	NA	NA	NA	NA	NA	NA	NA	NA	NA	NA	NA
NA	reactome_Formation_of_HIV_1_elongation_complex_containing_HIV_1_Tat_Main_Pathway	NA	NA	NA	NA	NA	NA	NA	NA	NA	NA	NA	NA	NA
NA	reactome_Formation_of_HIV_elongation_complex_in_the_absence_of_HIV_Tat_Main_Pathway	NA	NA	NA	NA	NA	NA	NA	NA	NA	NA	NA	NA	NA
NA	reactome_Formation_of_incision_complex_in_GG_NER_Main_Pathway	NA	NA	NA	NA	NA	NA	NA	NA	NA	NA	NA	NA	NA
NA	reactome_Formation_of_RNA_Pol_II_elongation_complex_Main_Pathway	NA	NA	NA	NA	NA	NA	NA	NA	NA	NA	NA	NA	NA
NA	reactome_Formation_of_Senescence_Associated_Heterochromatin_Foci_SAHF__Main_Pathway	NA	NA	NA	NA	NA	NA	NA	NA	NA	NA	NA	NA	NA
NA	reactome_Formation_of_the_active_cofactor_UDP_glucuronate_Main_Pathway	NA	NA	NA	NA	NA	NA	NA	NA	NA	NA	NA	NA	NA
NA	reactome_formation_of_the_beta_catenin_TCF_transactivating_complex_Main_Pathway	NA	NA	NA	NA	NA	NA	NA	NA	NA	NA	NA	NA	NA
NA	reactome_Formation_of_the_Early_Elongation_Complex_Main_Pathway	NA	NA	NA	NA	NA	NA	NA	NA	NA	NA	NA	NA	NA
NA	reactome_Formation_of_the_HIV_1_Early_Elongation_Complex_Main_Pathway	NA	NA	NA	NA	NA	NA	NA	NA	NA	NA	NA	NA	NA
NA	reactome_Formation_of_transcription_coupled_NER_TC_NER_repair_complex_Main_Pathway	NA	NA	NA	NA	NA	NA	NA	NA	NA	NA	NA	NA	NA
NA	reactome_Formation_of_tubulin_folding_intermediates_by_CCT_TriC_Main_Pathway	NA	NA	NA	NA	NA	NA	NA	NA	NA	NA	NA	NA	NA
NA	reactome_G0_and_Early_G1_Main_Pathway	NA	NA	NA	NA	NA	NA	NA	NA	NA	NA	NA	NA	NA
NA	reactome_G1_S_Specific_Transcription_Main_Pathway	NA	NA	NA	NA	NA	NA	NA	NA	NA	NA	NA	NA	NA
NA	reactome_G2_M_DNA_damage_checkpoint_Main_Pathway	NA	NA	NA	NA	NA	NA	NA	NA	NA	NA	NA	NA	NA
NA	reactome_G2_M_DNA_replication_checkpoint_Main_Pathway	NA	NA	NA	NA	NA	NA	NA	NA	NA	NA	NA	NA	NA
NA	reactome_G2_Phase_Main_Pathway	NA	NA	NA	NA	NA	NA	NA	NA	NA	NA	NA	NA	NA
NA	reactome_Gastrin_CREB_signalling_pathway_via_PKC_and_MAPK_Main_Pathway	NA	NA	NA	NA	NA	NA	NA	NA	NA	NA	NA	NA	NA
NA	reactome_Glutathione_synthesis_and_recycling_Main_Pathway	NA	NA	NA	NA	NA	NA	NA	NA	NA	NA	NA	NA	NA
NA	reactome_HATs_acetylate_histones_Main_Pathway	NA	NA	NA	NA	NA	NA	NA	NA	NA	NA	NA	NA	NA
NA	reactome_HDACs_deacetylate_histones_Main_Pathway	NA	NA	NA	NA	NA	NA	NA	NA	NA	NA	NA	NA	NA
NA	reactome_HDL_mediated_lipid_transport_Main_Pathway	NA	NA	NA	NA	NA	NA	NA	NA	NA	NA	NA	NA	NA
NA	reactome_HDMs_demethylate_histones_Main_Pathway	NA	NA	NA	NA	NA	NA	NA	NA	NA	NA	NA	NA	NA
NA	reactome_Heme_biosynthesis_Main_Pathway	NA	NA	NA	NA	NA	NA	NA	NA	NA	NA	NA	NA	NA
NA	reactome_Heme_degradation_Main_Pathway	NA	NA	NA	NA	NA	NA	NA	NA	NA	NA	NA	NA	NA
NA	reactome_HIV_elongation_arrest_and_recovery_Main_Pathway	NA	NA	NA	NA	NA	NA	NA	NA	NA	NA	NA	NA	NA
NA	reactome_HIV_Transcription_Initiation_Main_Pathway	NA	NA	NA	NA	NA	NA	NA	NA	NA	NA	NA	NA	NA
NA	reactome_HS_GAG_biosynthesis_Main_Pathway	NA	NA	NA	NA	NA	NA	NA	NA	NA	NA	NA	NA	NA
NA	reactome_HS_GAG_degradation_Main_Pathway	NA	NA	NA	NA	NA	NA	NA	NA	NA	NA	NA	NA	NA
NA	reactome_HuR_stabilizes_mRNA_Main_Pathway	NA	NA	NA	NA	NA	NA	NA	NA	NA	NA	NA	NA	NA
NA	reactome_Hyaluronan_uptake_and_degradation_Main_Pathway	NA	NA	NA	NA	NA	NA	NA	NA	NA	NA	NA	NA	NA
NA	reactome_Hydrolysis_of_LPC_Main_Pathway	NA	NA	NA	NA	NA	NA	NA	NA	NA	NA	NA	NA	NA
NA	reactome_Inactivation_of_APC_C_via_direct_inhibition_of_the_APC_C_complex_Main_Pathway	NA	NA	NA	NA	NA	NA	NA	NA	NA	NA	NA	NA	NA
NA	reactome_Inactivation_of_Cdc42_and_Rac_Main_Pathway	NA	NA	NA	NA	NA	NA	NA	NA	NA	NA	NA	NA	NA
NA	reactome_Inhibition_of_replication_initiation_of_damaged_DNA_by_RB1_E2F1_Main_Pathway	NA	NA	NA	NA	NA	NA	NA	NA	NA	NA	NA	NA	NA
NA	reactome_Inhibition_of_TSC_complex_formation_by_PKB_Main_Pathway	NA	NA	NA	NA	NA	NA	NA	NA	NA	NA	NA	NA	NA
NA	reactome_Insulin_like_Growth_Factor_2_mRNA_Binding_Proteins_IGF2BPs_IMPs_VICKZs_bind_RNA_Main_Pathway	NA	NA	NA	NA	NA	NA	NA	NA	NA	NA	NA	NA	NA
NA	reactome_Integration_of_energy_metabolism_Main_Pathway	NA	NA	NA	NA	NA	NA	NA	NA	NA	NA	NA	NA	NA
NA	reactome_Integration_of_provirus_Main_Pathway	NA	NA	NA	NA	NA	NA	NA	NA	NA	NA	NA	NA	NA
NA	reactome_Integration_of_viral_DNA_into_host_genomic_DNA_Main_Pathway	NA	NA	NA	NA	NA	NA	NA	NA	NA	NA	NA	NA	NA
NA	reactome_Interleukin_1_signaling_Main_Pathway	NA	NA	NA	NA	NA	NA	NA	NA	NA	NA	NA	NA	NA
NA	reactome_Iron_uptake_and_transport_Main_Pathway	NA	NA	NA	NA	NA	NA	NA	NA	NA	NA	NA	NA	NA
NA	reactome_Kinesins_Main_Pathway	NA	NA	NA	NA	NA	NA	NA	NA	NA	NA	NA	NA	NA
NA	reactome_KSRP_destabilizes_mRNA_Main_Pathway	NA	NA	NA	NA	NA	NA	NA	NA	NA	NA	NA	NA	NA
NA	reactome_Leading_Strand_Synthesis_Main_Pathway	NA	NA	NA	NA	NA	NA	NA	NA	NA	NA	NA	NA	NA
NA	reactome_Linoleic_acid_LA_metabolism_Main_Pathway	NA	NA	NA	NA	NA	NA	NA	NA	NA	NA	NA	NA	NA
NA	reactome_Loss_of_Nlp_from_mitotic_centrosomes_Main_Pathway	NA	NA	NA	NA	NA	NA	NA	NA	NA	NA	NA	NA	NA
NA	reactome_Loss_of_proteins_required_for_interphase_microtubule_organizationA_from_the_centrosome_Main_Pathway	NA	NA	NA	NA	NA	NA	NA	NA	NA	NA	NA	NA	NA
NA	reactome_LRR_FLII_interacting_protein_1_LRRFIP1_activates_type_I_IFN_production_Main_Pathway	NA	NA	NA	NA	NA	NA	NA	NA	NA	NA	NA	NA	NA
NA	reactome_Meiotic_recombination_Main_Pathway	NA	NA	NA	NA	NA	NA	NA	NA	NA	NA	NA	NA	NA
NA	reactome_Meiotic_synapsis_Main_Pathway	NA	NA	NA	NA	NA	NA	NA	NA	NA	NA	NA	NA	NA
NA	reactome_Metabolism_of_folate_and_pterines_Main_Pathway	NA	NA	NA	NA	NA	NA	NA	NA	NA	NA	NA	NA	NA
NA	reactome_Metabolism_of_polyamines_Main_Pathway	NA	NA	NA	NA	NA	NA	NA	NA	NA	NA	NA	NA	NA
NA	reactome_Methylation_Main_Pathway	NA	NA	NA	NA	NA	NA	NA	NA	NA	NA	NA	NA	NA
NA	reactome_MHC_class_II_antigen_presentation_Main_Pathway	NA	NA	NA	NA	NA	NA	NA	NA	NA	NA	NA	NA	NA
NA	reactome_Mismatch_repair_MMR_directed_by_MSH2_MSH3_MutSbeta__Main_Pathway	NA	NA	NA	NA	NA	NA	NA	NA	NA	NA	NA	NA	NA
NA	reactome_Mismatch_repair_MMR_directed_by_MSH2_MSH6_MutSalpha__Main_Pathway	NA	NA	NA	NA	NA	NA	NA	NA	NA	NA	NA	NA	NA
NA	reactome_Mitochondrial_transcription_initiation_Main_Pathway	NA	NA	NA	NA	NA	NA	NA	NA	NA	NA	NA	NA	NA
NA	reactome_Mitochondrial_tRNA_aminoacylation_Main_Pathway	NA	NA	NA	NA	NA	NA	NA	NA	NA	NA	NA	NA	NA
NA	reactome_Mitotic_Prometaphase_Main_Pathway	NA	NA	NA	NA	NA	NA	NA	NA	NA	NA	NA	NA	NA
NA	reactome_Molybdenum_cofactor_biosynthesis_Main_Pathway	NA	NA	NA	NA	NA	NA	NA	NA	NA	NA	NA	NA	NA
NA	reactome_mRNA_3_end_processing_Main_Pathway	NA	NA	NA	NA	NA	NA	NA	NA	NA	NA	NA	NA	NA
NA	reactome_mRNA_Capping_Main_Pathway	NA	NA	NA	NA	NA	NA	NA	NA	NA	NA	NA	NA	NA
NA	reactome_mRNA_decay_by_3_to_5_exoribonuclease_Main_Pathway	NA	NA	NA	NA	NA	NA	NA	NA	NA	NA	NA	NA	NA
NA	reactome_mRNA_decay_by_5_to_3_exoribonuclease_Main_Pathway	NA	NA	NA	NA	NA	NA	NA	NA	NA	NA	NA	NA	NA
NA	reactome_Muscarinic_acetylcholine_receptors_Main_Pathway	NA	NA	NA	NA	NA	NA	NA	NA	NA	NA	NA	NA	NA
NA	reactome_NCAM_signaling_for_neurite_out_growth_Main_Pathway	NA	NA	NA	NA	NA	NA	NA	NA	NA	NA	NA	NA	NA
NA	reactome_negative_regulation_of_TCF_dependent_signaling_by_DVL_interacting_proteins_Main_Pathway	NA	NA	NA	NA	NA	NA	NA	NA	NA	NA	NA	NA	NA
NA	reactome_NEP_NS2_Interacts_with_the_Cellular_Export_Machinery_Main_Pathway	NA	NA	NA	NA	NA	NA	NA	NA	NA	NA	NA	NA	NA
NA	reactome_Netrin_mediated_repulsion_signals_Main_Pathway	NA	NA	NA	NA	NA	NA	NA	NA	NA	NA	NA	NA	NA
NA	reactome_NICD_traffics_to_nucleus_Main_Pathway	NA	NA	NA	NA	NA	NA	NA	NA	NA	NA	NA	NA	NA
NA	reactome_NOD1_2_Signaling_Pathway_Main_Pathway	NA	NA	NA	NA	NA	NA	NA	NA	NA	NA	NA	NA	NA
NA	reactome_Nonhomologous_End_joining_NHEJ__Main_Pathway	NA	NA	NA	NA	NA	NA	NA	NA	NA	NA	NA	NA	NA
NA	reactome_NoRC_negatively_regulates_rRNA_expression_Main_Pathway	NA	NA	NA	NA	NA	NA	NA	NA	NA	NA	NA	NA	NA
NA	reactome_Notch_HLH_transcription_Main_Pathway	NA	NA	NA	NA	NA	NA	NA	NA	NA	NA	NA	NA	NA
NA	reactome_NOTCH1_Intracellular_Domain_Regulates_Transcription_Main_Pathway	NA	NA	NA	NA	NA	NA	NA	NA	NA	NA	NA	NA	NA
NA	reactome_NOTCH2_intracellular_domain_regulates_transcription_Main_Pathway	NA	NA	NA	NA	NA	NA	NA	NA	NA	NA	NA	NA	NA
NA	reactome_NRIF_signals_cell_death_from_the_nucleus_Main_Pathway	NA	NA	NA	NA	NA	NA	NA	NA	NA	NA	NA	NA	NA
NA	reactome_Nuclear_import_of_Rev_protein_Main_Pathway	NA	NA	NA	NA	NA	NA	NA	NA	NA	NA	NA	NA	NA
NA	reactome_Nuclear_Pore_Complex_NPC_Disassembly_Main_Pathway	NA	NA	NA	NA	NA	NA	NA	NA	NA	NA	NA	NA	NA
NA	reactome_Nuclear_Receptor_transcription_Main_Pathway	NA	NA	NA	NA	NA	NA	NA	NA	NA	NA	NA	NA	NA
NA	reactome_O_linked_glycosylation_of_mucins_Main_Pathway	NA	NA	NA	NA	NA	NA	NA	NA	NA	NA	NA	NA	NA
NA	reactome_Orc1_removal_from_chromatin_Main_Pathway	NA	NA	NA	NA	NA	NA	NA	NA	NA	NA	NA	NA	NA
NA	reactome_P2Y_receptors_Main_Pathway	NA	NA	NA	NA	NA	NA	NA	NA	NA	NA	NA	NA	NA
NA	reactome_p53_Dependent_G1_DNA_Damage_Response_Main_Pathway	NA	NA	NA	NA	NA	NA	NA	NA	NA	NA	NA	NA	NA
NA	reactome_p75NTR_negatively_regulates_cell_cycle_via_SC1_Main_Pathway	NA	NA	NA	NA	NA	NA	NA	NA	NA	NA	NA	NA	NA
NA	reactome_Packaging_Of_Telomere_Ends_Main_Pathway	NA	NA	NA	NA	NA	NA	NA	NA	NA	NA	NA	NA	NA
NA	reactome_Pausing_and_recovery_of_HIV_elongation_Main_Pathway	NA	NA	NA	NA	NA	NA	NA	NA	NA	NA	NA	NA	NA
NA	reactome_Pausing_and_recovery_of_Tat_mediated_HIV_elongation_Main_Pathway	NA	NA	NA	NA	NA	NA	NA	NA	NA	NA	NA	NA	NA
NA	reactome_PCP_CE_Main_Pathway	NA	NA	NA	NA	NA	NA	NA	NA	NA	NA	NA	NA	NA
NA	reactome_Pentose_phosphate_pathway_hexose_monophosphate_shunt__Main_Pathway	NA	NA	NA	NA	NA	NA	NA	NA	NA	NA	NA	NA	NA
NA	reactome_Phosphate_bond_hydrolysis_by_NUDT_proteins_Main_Pathway	NA	NA	NA	NA	NA	NA	NA	NA	NA	NA	NA	NA	NA
NA	reactome_Phosphorylation_of_Emi1_Main_Pathway	NA	NA	NA	NA	NA	NA	NA	NA	NA	NA	NA	NA	NA
NA	reactome_Phosphorylation_of_proteins_involved_in_G1_S_transition_by_active_Cyclin_E_Cdk2_complexes_Main_Pathway	NA	NA	NA	NA	NA	NA	NA	NA	NA	NA	NA	NA	NA
NA	reactome_Phosphorylation_of_proteins_involved_in_the_G2_M_transition_by_Cyclin_A_Cdc2_complexes_Main_Pathway	NA	NA	NA	NA	NA	NA	NA	NA	NA	NA	NA	NA	NA
NA	reactome_Phosphorylation_of_the_APC_C_Main_Pathway	NA	NA	NA	NA	NA	NA	NA	NA	NA	NA	NA	NA	NA
NA	reactome_PLC_gamma1_signalling_Main_Pathway	NA	NA	NA	NA	NA	NA	NA	NA	NA	NA	NA	NA	NA
NA	reactome_Polo_like_kinase_mediated_events_Main_Pathway	NA	NA	NA	NA	NA	NA	NA	NA	NA	NA	NA	NA	NA
NA	reactome_Polymerase_switching_Main_Pathway	NA	NA	NA	NA	NA	NA	NA	NA	NA	NA	NA	NA	NA
NA	reactome_Polymerase_switching_on_the_C_strand_of_the_telomere_Main_Pathway	NA	NA	NA	NA	NA	NA	NA	NA	NA	NA	NA	NA	NA
NA	reactome_Post_transcriptional_silencing_by_small_RNAs_Main_Pathway	NA	NA	NA	NA	NA	NA	NA	NA	NA	NA	NA	NA	NA
NA	reactome_PP2A_mediated_dephosphorylation_of_key_metabolic_factors_Main_Pathway	NA	NA	NA	NA	NA	NA	NA	NA	NA	NA	NA	NA	NA
NA	reactome_PPARA_activates_gene_expression_Main_Pathway	NA	NA	NA	NA	NA	NA	NA	NA	NA	NA	NA	NA	NA
NA	reactome_PRC2_methylates_histones_and_DNA_Main_Pathway	NA	NA	NA	NA	NA	NA	NA	NA	NA	NA	NA	NA	NA
NA	reactome_pre_mRNA_splicing_Main_Pathway	NA	NA	NA	NA	NA	NA	NA	NA	NA	NA	NA	NA	NA
NA	reactome_Prefoldin_mediated_transfer_of_substrate_to_CCT_TriC_Main_Pathway	NA	NA	NA	NA	NA	NA	NA	NA	NA	NA	NA	NA	NA
NA	reactome_Presynaptic_phase_of_homologous_DNA_pairing_and_strand_exchange_Main_Pathway	NA	NA	NA	NA	NA	NA	NA	NA	NA	NA	NA	NA	NA
NA	reactome_Processing_of_Capped_Intron_Containing_Pre_mRNA_Main_Pathway	NA	NA	NA	NA	NA	NA	NA	NA	NA	NA	NA	NA	NA
NA	reactome_Processing_of_DNA_double_strand_break_ends_Main_Pathway	NA	NA	NA	NA	NA	NA	NA	NA	NA	NA	NA	NA	NA
NA	reactome_Processing_of_DNA_ends_prior_to_end_rejoining_Main_Pathway	NA	NA	NA	NA	NA	NA	NA	NA	NA	NA	NA	NA	NA
NA	reactome_Processing_of_Intronless_Pre_mRNAs_Main_Pathway	NA	NA	NA	NA	NA	NA	NA	NA	NA	NA	NA	NA	NA
NA	reactome_Processive_synthesis_on_the_C_strand_of_the_telomere_Main_Pathway	NA	NA	NA	NA	NA	NA	NA	NA	NA	NA	NA	NA	NA
NA	reactome_Processive_synthesis_on_the_lagging_strand_Main_Pathway	NA	NA	NA	NA	NA	NA	NA	NA	NA	NA	NA	NA	NA
NA	reactome_Prostanoid_ligand_receptors_Main_Pathway	NA	NA	NA	NA	NA	NA	NA	NA	NA	NA	NA	NA	NA
NA	reactome_Proton_coupled_monocarboxylate_transport_Main_Pathway	NA	NA	NA	NA	NA	NA	NA	NA	NA	NA	NA	NA	NA
NA	reactome_Purine_ribonucleoside_monophosphate_biosynthesis_Main_Pathway	NA	NA	NA	NA	NA	NA	NA	NA	NA	NA	NA	NA	NA
NA	reactome_Purine_salvage_Main_Pathway	NA	NA	NA	NA	NA	NA	NA	NA	NA	NA	NA	NA	NA
NA	reactome_Pyrimidine_biosynthesis_Main_Pathway	NA	NA	NA	NA	NA	NA	NA	NA	NA	NA	NA	NA	NA
NA	reactome_Pyrimidine_salvage_reactions_Main_Pathway	NA	NA	NA	NA	NA	NA	NA	NA	NA	NA	NA	NA	NA
NA	reactome_Recognition_and_association_of_DNA_glycosylase_with_site_containing_an_affected_purine_Main_Pathway	NA	NA	NA	NA	NA	NA	NA	NA	NA	NA	NA	NA	NA
NA	reactome_Recruitment_of_mitotic_centrosome_proteins_and_complexes_Main_Pathway	NA	NA	NA	NA	NA	NA	NA	NA	NA	NA	NA	NA	NA
NA	reactome_Recruitment_of_NuMA_to_mitotic_centrosomes_Main_Pathway	NA	NA	NA	NA	NA	NA	NA	NA	NA	NA	NA	NA	NA
NA	reactome_Recruitment_of_repair_and_signaling_proteins_to_double_strand_breaks_Main_Pathway	NA	NA	NA	NA	NA	NA	NA	NA	NA	NA	NA	NA	NA
NA	reactome_Regulation_of_APC_C_activators_between_G1_S_and_early_anaphase_Main_Pathway	NA	NA	NA	NA	NA	NA	NA	NA	NA	NA	NA	NA	NA
NA	reactome_Regulation_of_Commissural_axon_pathfinding_by_Slit_and_Robo_Main_Pathway	NA	NA	NA	NA	NA	NA	NA	NA	NA	NA	NA	NA	NA
NA	reactome_Regulation_of_gene_expression_by_Hypoxia_inducible_Factor_Main_Pathway	NA	NA	NA	NA	NA	NA	NA	NA	NA	NA	NA	NA	NA
NA	reactome_Regulation_of_Glucokinase_by_Glucokinase_Regulatory_Protein_Main_Pathway	NA	NA	NA	NA	NA	NA	NA	NA	NA	NA	NA	NA	NA
NA	reactome_Regulation_of_lipid_metabolism_by_Peroxisome_proliferator_activated_receptor_alpha_PPARalpha__Main_Pathway	NA	NA	NA	NA	NA	NA	NA	NA	NA	NA	NA	NA	NA
NA	reactome_Regulation_of_ornithine_decarboxylase_ODC__Main_Pathway	NA	NA	NA	NA	NA	NA	NA	NA	NA	NA	NA	NA	NA
NA	reactome_Regulation_of_PLK1_Activity_at_G2_M_Transition_Main_Pathway	NA	NA	NA	NA	NA	NA	NA	NA	NA	NA	NA	NA	NA
NA	reactome_Regulation_of_pyruvate_dehydrogenase_PDH_complex_Main_Pathway	NA	NA	NA	NA	NA	NA	NA	NA	NA	NA	NA	NA	NA
NA	reactome_Regulation_of_the_Fanconi_anemia_Main_Pathway	NA	NA	NA	NA	NA	NA	NA	NA	NA	NA	NA	NA	NA
NA	reactome_Release_of_eIF4E_Main_Pathway	NA	NA	NA	NA	NA	NA	NA	NA	NA	NA	NA	NA	NA
NA	reactome_Removal_of_DNA_patch_containing_abasic_residue_Main_Pathway	NA	NA	NA	NA	NA	NA	NA	NA	NA	NA	NA	NA	NA
NA	reactome_Removal_of_the_Flap_Intermediate_from_the_C_strand_Main_Pathway	NA	NA	NA	NA	NA	NA	NA	NA	NA	NA	NA	NA	NA
NA	reactome_Removal_of_the_Flap_Intermediate_Main_Pathway	NA	NA	NA	NA	NA	NA	NA	NA	NA	NA	NA	NA	NA
NA	reactome_Repair_synthesis_for_gap_filling_by_DNA_polymerase_in_TC_NER_Main_Pathway	NA	NA	NA	NA	NA	NA	NA	NA	NA	NA	NA	NA	NA
NA	reactome_Repair_synthesis_of_patch_27_30_bases_long_by_DNA_polymerase_Main_Pathway	NA	NA	NA	NA	NA	NA	NA	NA	NA	NA	NA	NA	NA
NA	reactome_repression_of_WNT_target_genes_Main_Pathway	NA	NA	NA	NA	NA	NA	NA	NA	NA	NA	NA	NA	NA
NA	reactome_Resolution_of_AP_sites_via_the_multiple_nucleotide_patch_replacement_Main_Pathway	NA	NA	NA	NA	NA	NA	NA	NA	NA	NA	NA	NA	NA
NA	reactome_Resolution_of_AP_sites_via_the_single_nucleotide_replacement_Main_Pathway	NA	NA	NA	NA	NA	NA	NA	NA	NA	NA	NA	NA	NA
NA	reactome_Resolution_of_Sister_Chromatid_Cohesion_Main_Pathway	NA	NA	NA	NA	NA	NA	NA	NA	NA	NA	NA	NA	NA
NA	reactome_Response_to_elevated_platelet_cytosolic_Ca2__Main_Pathway	NA	NA	NA	NA	NA	NA	NA	NA	NA	NA	NA	NA	NA
NA	reactome_Retinoid_metabolism_and_transport_Main_Pathway	NA	NA	NA	NA	NA	NA	NA	NA	NA	NA	NA	NA	NA
NA	reactome_Rev_mediated_nuclear_export_of_HIV_RNA_Main_Pathway	NA	NA	NA	NA	NA	NA	NA	NA	NA	NA	NA	NA	NA
NA	reactome_Rho_GTPase_cycle_Main_Pathway	NA	NA	NA	NA	NA	NA	NA	NA	NA	NA	NA	NA	NA
NA	reactome_RMTs_methylate_histone_arginines_Main_Pathway	NA	NA	NA	NA	NA	NA	NA	NA	NA	NA	NA	NA	NA
NA	reactome_RNA_Pol_II_CTD_phosphorylation_and_interaction_with_CE_Main_Pathway	NA	NA	NA	NA	NA	NA	NA	NA	NA	NA	NA	NA	NA
NA	reactome_RNA_Polymerase_I_Chain_Elongation_Main_Pathway	NA	NA	NA	NA	NA	NA	NA	NA	NA	NA	NA	NA	NA
NA	reactome_RNA_Polymerase_I_Promoter_Escape_Main_Pathway	NA	NA	NA	NA	NA	NA	NA	NA	NA	NA	NA	NA	NA
NA	reactome_RNA_Polymerase_I_Transcription_Initiation_Main_Pathway	NA	NA	NA	NA	NA	NA	NA	NA	NA	NA	NA	NA	NA
NA	reactome_RNA_Polymerase_I_Transcription_Termination_Main_Pathway	NA	NA	NA	NA	NA	NA	NA	NA	NA	NA	NA	NA	NA
NA	reactome_RNA_Polymerase_II_HIV_Promoter_Escape_Main_Pathway	NA	NA	NA	NA	NA	NA	NA	NA	NA	NA	NA	NA	NA
NA	reactome_RNA_Polymerase_II_Pre_transcription_Events_Main_Pathway	NA	NA	NA	NA	NA	NA	NA	NA	NA	NA	NA	NA	NA
NA	reactome_RNA_Polymerase_II_Promoter_Escape_Main_Pathway	NA	NA	NA	NA	NA	NA	NA	NA	NA	NA	NA	NA	NA
NA	reactome_RNA_Polymerase_II_Transcription_Elongation_Main_Pathway	NA	NA	NA	NA	NA	NA	NA	NA	NA	NA	NA	NA	NA
NA	reactome_RNA_Polymerase_II_Transcription_Initiation_And_Promoter_Clearance_Main_Pathway	NA	NA	NA	NA	NA	NA	NA	NA	NA	NA	NA	NA	NA
NA	reactome_RNA_Polymerase_II_Transcription_Initiation_Main_Pathway	NA	NA	NA	NA	NA	NA	NA	NA	NA	NA	NA	NA	NA
NA	reactome_RNA_Polymerase_II_Transcription_Pre_Initiation_And_Promoter_Opening_Main_Pathway	NA	NA	NA	NA	NA	NA	NA	NA	NA	NA	NA	NA	NA
NA	reactome_RNA_Polymerase_III_Abortive_And_Retractive_Initiation_Main_Pathway	NA	NA	NA	NA	NA	NA	NA	NA	NA	NA	NA	NA	NA
NA	reactome_RNA_Polymerase_III_Transcription_Initiation_From_Type_1_Promoter_Main_Pathway	NA	NA	NA	NA	NA	NA	NA	NA	NA	NA	NA	NA	NA
NA	reactome_RNA_Polymerase_III_Transcription_Initiation_From_Type_2_Promoter_Main_Pathway	NA	NA	NA	NA	NA	NA	NA	NA	NA	NA	NA	NA	NA
NA	reactome_RNA_Polymerase_III_Transcription_Termination_Main_Pathway	NA	NA	NA	NA	NA	NA	NA	NA	NA	NA	NA	NA	NA
NA	reactome_Role_of_Abl_in_Robo_Slit_signaling_Main_Pathway	NA	NA	NA	NA	NA	NA	NA	NA	NA	NA	NA	NA	NA
NA	reactome_Role_of_second_messengers_in_netrin_1_signaling_Main_Pathway	NA	NA	NA	NA	NA	NA	NA	NA	NA	NA	NA	NA	NA
NA	reactome_S6K1_signalling_Main_Pathway	NA	NA	NA	NA	NA	NA	NA	NA	NA	NA	NA	NA	NA
NA	reactome_Scavenging_by_Class_F_Receptors_Main_Pathway	NA	NA	NA	NA	NA	NA	NA	NA	NA	NA	NA	NA	NA
NA	reactome_SCF_Skp2_mediated_degradation_of_p27_p21_Main_Pathway	NA	NA	NA	NA	NA	NA	NA	NA	NA	NA	NA	NA	NA
NA	reactome_Sema3A_PAK_dependent_Axon_repulsion_Main_Pathway	NA	NA	NA	NA	NA	NA	NA	NA	NA	NA	NA	NA	NA
NA	reactome_SEMA3A_Plexin_repulsion_signaling_by_inhibiting_Integrin_adhesion_Main_Pathway	NA	NA	NA	NA	NA	NA	NA	NA	NA	NA	NA	NA	NA
NA	reactome_Senescence_Associated_Secretory_Phenotype_SASP__Main_Pathway	NA	NA	NA	NA	NA	NA	NA	NA	NA	NA	NA	NA	NA
NA	reactome_Separation_of_Sister_Chromatids_Main_Pathway	NA	NA	NA	NA	NA	NA	NA	NA	NA	NA	NA	NA	NA
NA	reactome_Serine_biosynthesis_Main_Pathway	NA	NA	NA	NA	NA	NA	NA	NA	NA	NA	NA	NA	NA
NA	reactome_SHC_activation_Main_Pathway	NA	NA	NA	NA	NA	NA	NA	NA	NA	NA	NA	NA	NA
NA	reactome_Signaling_by_BMP_Main_Pathway	NA	NA	NA	NA	NA	NA	NA	NA	NA	NA	NA	NA	NA
NA	reactome_Signaling_by_FGFR1_fusion_mutants_Main_Pathway	NA	NA	NA	NA	NA	NA	NA	NA	NA	NA	NA	NA	NA
NA	reactome_Signaling_by_NODAL_Main_Pathway	NA	NA	NA	NA	NA	NA	NA	NA	NA	NA	NA	NA	NA
NA	reactome_Signaling_by_Robo_receptor_Main_Pathway	NA	NA	NA	NA	NA	NA	NA	NA	NA	NA	NA	NA	NA
NA	reactome_SIRT1_negatively_regulates_rRNA_Expression_Main_Pathway	NA	NA	NA	NA	NA	NA	NA	NA	NA	NA	NA	NA	NA
NA	reactome_SLBP_Dependent_Processing_of_Replication_Dependent_Histone_Pre_mRNAs_Main_Pathway	NA	NA	NA	NA	NA	NA	NA	NA	NA	NA	NA	NA	NA
NA	reactome_SLBP_independent_Processing_of_Histone_Pre_mRNAs_Main_Pathway	NA	NA	NA	NA	NA	NA	NA	NA	NA	NA	NA	NA	NA
NA	reactome_SMAD2_SMAD3_SMAD4_heterotrimer_regulates_transcription_Main_Pathway	NA	NA	NA	NA	NA	NA	NA	NA	NA	NA	NA	NA	NA
NA	reactome_snRNP_Assembly_Main_Pathway	NA	NA	NA	NA	NA	NA	NA	NA	NA	NA	NA	NA	NA
NA	reactome_Sodium_Proton_exchangers_Main_Pathway	NA	NA	NA	NA	NA	NA	NA	NA	NA	NA	NA	NA	NA
NA	reactome_STING_mediated_induction_of_host_immune_responses_Main_Pathway	NA	NA	NA	NA	NA	NA	NA	NA	NA	NA	NA	NA	NA
NA	reactome_Sulfur_amino_acid_metabolism_Main_Pathway	NA	NA	NA	NA	NA	NA	NA	NA	NA	NA	NA	NA	NA
NA	reactome_SUMO_is_conjugated_to_E1_UBA2_SAE1__Main_Pathway	NA	NA	NA	NA	NA	NA	NA	NA	NA	NA	NA	NA	NA
NA	reactome_SUMO_is_proteolytically_processed_Main_Pathway	NA	NA	NA	NA	NA	NA	NA	NA	NA	NA	NA	NA	NA
NA	reactome_SUMO_is_transferred_from_E1_to_E2_UBE2I_UBC9__Main_Pathway	NA	NA	NA	NA	NA	NA	NA	NA	NA	NA	NA	NA	NA
NA	reactome_Switching_of_origins_to_a_post_replicative_state_Main_Pathway	NA	NA	NA	NA	NA	NA	NA	NA	NA	NA	NA	NA	NA
NA	reactome_Synthesis_of_16_20_hydroxyeicosatetraenoic_acids_HETE__Main_Pathway	NA	NA	NA	NA	NA	NA	NA	NA	NA	NA	NA	NA	NA
NA	reactome_Synthesis_of_bile_acids_and_bile_salts_via_24_hydroxycholesterol_Main_Pathway	NA	NA	NA	NA	NA	NA	NA	NA	NA	NA	NA	NA	NA
NA	reactome_Synthesis_of_bile_acids_and_bile_salts_via_27_hydroxycholesterol_Main_Pathway	NA	NA	NA	NA	NA	NA	NA	NA	NA	NA	NA	NA	NA
NA	reactome_Synthesis_of_bile_acids_and_bile_salts_via_7alpha_hydroxycholesterol_Main_Pathway	NA	NA	NA	NA	NA	NA	NA	NA	NA	NA	NA	NA	NA
NA	reactome_Synthesis_of_epoxy_EET_and_dihydroxyeicosatrienoic_acids_DHET__Main_Pathway	NA	NA	NA	NA	NA	NA	NA	NA	NA	NA	NA	NA	NA
NA	reactome_Synthesis_of_PA_Main_Pathway	NA	NA	NA	NA	NA	NA	NA	NA	NA	NA	NA	NA	NA
NA	reactome_Synthesis_of_PE_Main_Pathway	NA	NA	NA	NA	NA	NA	NA	NA	NA	NA	NA	NA	NA
NA	reactome_Synthesis_of_PIPs_at_the_early_endosome_membrane_Main_Pathway	NA	NA	NA	NA	NA	NA	NA	NA	NA	NA	NA	NA	NA
NA	reactome_Synthesis_of_PIPs_at_the_Golgi_membrane_Main_Pathway	NA	NA	NA	NA	NA	NA	NA	NA	NA	NA	NA	NA	NA
NA	reactome_Synthesis_of_PIPs_at_the_late_endosome_membrane_Main_Pathway	NA	NA	NA	NA	NA	NA	NA	NA	NA	NA	NA	NA	NA
NA	reactome_Synthesis_of_very_long_chain_fatty_acyl_CoAs_Main_Pathway	NA	NA	NA	NA	NA	NA	NA	NA	NA	NA	NA	NA	NA
NA	reactome_Tat_mediated_elongation_of_the_HIV_1_transcript_Main_Pathway	NA	NA	NA	NA	NA	NA	NA	NA	NA	NA	NA	NA	NA
NA	reactome_Tat_mediated_HIV_elongation_arrest_and_recovery_Main_Pathway	NA	NA	NA	NA	NA	NA	NA	NA	NA	NA	NA	NA	NA
NA	reactome_Telomere_C_strand_Lagging_Strand_Synthesis_Main_Pathway	NA	NA	NA	NA	NA	NA	NA	NA	NA	NA	NA	NA	NA
NA	reactome_Telomere_C_strand_synthesis_initiation_Main_Pathway	NA	NA	NA	NA	NA	NA	NA	NA	NA	NA	NA	NA	NA
NA	reactome_Telomere_Extension_By_Telomerase_Main_Pathway	NA	NA	NA	NA	NA	NA	NA	NA	NA	NA	NA	NA	NA
NA	reactome_Termination_of_O_glycan_biosynthesis_Main_Pathway	NA	NA	NA	NA	NA	NA	NA	NA	NA	NA	NA	NA	NA
NA	reactome_Toll_Like_Receptor_9_TLR9_Cascade_Main_Pathway	NA	NA	NA	NA	NA	NA	NA	NA	NA	NA	NA	NA	NA
NA	reactome_Toxicity_of_botulinum_toxin_type_A_BoNT_A__Main_Pathway	NA	NA	NA	NA	NA	NA	NA	NA	NA	NA	NA	NA	NA
NA	reactome_Toxicity_of_botulinum_toxin_type_C_BoNT_C__Main_Pathway	NA	NA	NA	NA	NA	NA	NA	NA	NA	NA	NA	NA	NA
NA	reactome_Toxicity_of_botulinum_toxin_type_D_BoNT_D__Main_Pathway	NA	NA	NA	NA	NA	NA	NA	NA	NA	NA	NA	NA	NA
NA	reactome_Toxicity_of_botulinum_toxin_type_E_BoNT_E__Main_Pathway	NA	NA	NA	NA	NA	NA	NA	NA	NA	NA	NA	NA	NA
NA	reactome_Toxicity_of_botulinum_toxin_type_F_BoNT_F__Main_Pathway	NA	NA	NA	NA	NA	NA	NA	NA	NA	NA	NA	NA	NA
NA	reactome_Transcription_coupled_NER_TC_NER__Main_Pathway	NA	NA	NA	NA	NA	NA	NA	NA	NA	NA	NA	NA	NA
NA	reactome_Transcription_of_the_HIV_genome_Main_Pathway	NA	NA	NA	NA	NA	NA	NA	NA	NA	NA	NA	NA	NA
NA	reactome_Transcriptional_activation_of_mitochondrial_biogenesis_Main_Pathway	NA	NA	NA	NA	NA	NA	NA	NA	NA	NA	NA	NA	NA
NA	reactome_Transcriptional_regulation_of_white_adipocyte_differentiation_Main_Pathway	NA	NA	NA	NA	NA	NA	NA	NA	NA	NA	NA	NA	NA
NA	reactome_Transport_of_Mature_mRNA_derived_from_an_Intron_Containing_Transcript_Main_Pathway	NA	NA	NA	NA	NA	NA	NA	NA	NA	NA	NA	NA	NA
NA	reactome_Transport_of_Mature_mRNA_Derived_from_an_Intronless_Transcript_Main_Pathway	NA	NA	NA	NA	NA	NA	NA	NA	NA	NA	NA	NA	NA
NA	reactome_Transport_of_Ribonucleoproteins_into_the_Host_Nucleus_Main_Pathway	NA	NA	NA	NA	NA	NA	NA	NA	NA	NA	NA	NA	NA
NA	reactome_Transport_of_the_SLBP_Dependant_Mature_mRNA_Main_Pathway	NA	NA	NA	NA	NA	NA	NA	NA	NA	NA	NA	NA	NA
NA	reactome_Transport_of_the_SLBP_independent_Mature_mRNA_Main_Pathway	NA	NA	NA	NA	NA	NA	NA	NA	NA	NA	NA	NA	NA
NA	reactome_Transport_of_vitamins_nucleosides_and_related_molecules_Main_Pathway	NA	NA	NA	NA	NA	NA	NA	NA	NA	NA	NA	NA	NA
NA	reactome_Triglyceride_Biosynthesis_Main_Pathway	NA	NA	NA	NA	NA	NA	NA	NA	NA	NA	NA	NA	NA
NA	reactome_Tristetraprolin_TTP_destabilizes_mRNA_Main_Pathway	NA	NA	NA	NA	NA	NA	NA	NA	NA	NA	NA	NA	NA
NA	reactome_TRP_channels_Main_Pathway	NA	NA	NA	NA	NA	NA	NA	NA	NA	NA	NA	NA	NA
NA	reactome_Tryptophan_catabolism_Main_Pathway	NA	NA	NA	NA	NA	NA	NA	NA	NA	NA	NA	NA	NA
NA	reactome_TWIK_related_potassium_channel_TREK__Main_Pathway	NA	NA	NA	NA	NA	NA	NA	NA	NA	NA	NA	NA	NA
NA	reactome_U12_Dependent_Splicing_Main_Pathway	NA	NA	NA	NA	NA	NA	NA	NA	NA	NA	NA	NA	NA
NA	reactome_Ubiquinol_biosynthesis_Main_Pathway	NA	NA	NA	NA	NA	NA	NA	NA	NA	NA	NA	NA	NA
NA	reactome_Unwinding_of_DNA_Main_Pathway	NA	NA	NA	NA	NA	NA	NA	NA	NA	NA	NA	NA	NA
NA	reactome_Urea_cycle_Main_Pathway	NA	NA	NA	NA	NA	NA	NA	NA	NA	NA	NA	NA	NA
NA	reactome_Viral_Messenger_RNA_Synthesis_Main_Pathway	NA	NA	NA	NA	NA	NA	NA	NA	NA	NA	NA	NA	NA
NA	reactome_Vitamin_B2_riboflavin_metabolism_Main_Pathway	NA	NA	NA	NA	NA	NA	NA	NA	NA	NA	NA	NA	NA
NA	reactome_Vitamin_B5_pantothenate_metabolism_Main_Pathway	NA	NA	NA	NA	NA	NA	NA	NA	NA	NA	NA	NA	NA
NA	reactome_Vpr_mediated_nuclear_import_of_PICs_Main_Pathway	NA	NA	NA	NA	NA	NA	NA	NA	NA	NA	NA	NA	NA
NA	reactome_WNT_mediated_activation_of_DVL_Main_Pathway	NA	NA	NA	NA	NA	NA	NA	NA	NA	NA	NA	NA	NA
NA	reactome_WNT5A_dependent_internalization_of_FZD2_FZD5_and_ROR2_Main_Pathway	NA	NA	NA	NA	NA	NA	NA	NA	NA	NA	NA	NA	NA
NA	reactome_WNT5A_dependent_internalization_of_FZD4_Main_Pathway	NA	NA	NA	NA	NA	NA	NA	NA	NA	NA	NA	NA	NA
NA	reactome_XAV939_inhibits_tankyrase_stabilizing_AXIN_Main_Pathway	NA	NA	NA	NA	NA	NA	NA	NA	NA	NA	NA	NA	NA
NA	STAT3_Pathway_G1_to_S_Cell_Cycle_Progression	NA	NA	NA	NA	NA	NA	NA	NA	NA	NA	NA	NA	NA
NA	TNF_Signaling_Pathway	NA	NA	NA	NA	NA	NA	NA	NA	NA	NA	NA	NA	NA
NA	TNF_Signaling_Pathway_Apoptosis	NA	NA	NA	NA	NA	NA	NA	NA	NA	NA	NA	NA	NA
NA	Ubiquitin-Proteasome_Dependent_Proteolysis_Pathway	NA	NA	NA	NA	NA	NA	NA	NA	NA	NA	NA	NA	NA
NA	VEGF_Pathway_Cell_Survival	NA	NA	NA	NA	NA	NA	NA	NA	NA	NA	NA	NA	NA
NA	VEGF_Pathway_Gene_Expression_and_Cell_Proliferation_via_MAPK7	NA	NA	NA	NA	NA	NA	NA	NA	NA	NA	NA	NA	NA
NA	VEGF_Pathway_Prostaglandin_Production	NA	NA	NA	NA	NA	NA	NA	NA	NA	NA	NA	NA	NA
NA	WNT_Pathway_Cell_Survival	NA	NA	NA	NA	NA	NA	NA	NA	NA	NA	NA	NA	NA

## Sheet: GSE59861_12h_GSE55118
X1_sets_GSE55118_middle_vs_young	X1_sets_GSE55118_old_vs_young	X1_sets_GSE59861_12h_2Gy	X1_sets_GSE59861_12h_5cGy	X2_sets_GSE55118_middle_vs_young_GSE55118_old_vs_young	X2_sets_GSE55118_middle_vs_young_GSE59861_12h_2Gy	X2_sets_GSE55118_middle_vs_young_GSE59861_12h_5cGy	X2_sets_GSE55118_old_vs_young_GSE59861_12h_2Gy	X2_sets_GSE55118_old_vs_young_GSE59861_12h_5cGy	X2_sets_GSE59861_12h_2Gy_GSE59861_12h_5cGy	X3_sets_GSE55118_middle_vs_young_GSE55118_old_vs_young_GSE59861_12h_2Gy	X3_sets_GSE55118_middle_vs_young_GSE55118_old_vs_young_GSE59861_12h_5cGy	X3_sets_GSE55118_middle_vs_young_GSE59861_12h_2Gy_GSE59861_12h_5cGy	X3_sets_GSE55118_old_vs_young_GSE59861_12h_2Gy_GSE59861_12h_5cGy	X4_sets_GSE55118_middle_vs_young_GSE55118_old_vs_young_GSE59861_12h_2Gy_GSE59861_12h_5cGy
Estrogen_Pathway_Vasodilatation	NCI_Caspase_Cascade_in_Apoptosis_Pathway_(apoptotic_nuclear_changes)	ATM_Pathway_Repair_and_Recombination	EGF_Pathway_Rab5_Regulation_Pathway	PAK_Pathway_Paxillin_Disassembly	NA	NA	NCI_Regulation_of_Androgen_receptor_activity_Pathway_(Pathway_positive_regulation_of_transcription_via_GATA2)	NCI_Regulation_of_Androgen_receptor_activity_Pathway_(Pathway_positive_regulation_of_transcription_via_GATA2)	NCI_Calcineurin_regulated_NFAT_dependent_transcription_in_lymphocytes_Main_Pathway	NA	NA	NA	NCI_Regulation_of_Androgen_receptor_activity_Pathway_(Pathway_positive_regulation_of_transcription_via_GATA2)	NA
NCI_Arf6_downstream_Pathway_(actin_filament_bundle_formation)	NCI_Ephrin_A_reverse_signaling_Pathway_(MAPKKK_cascade)	Mismatch_Repair_in_Eukaryotes_Pathway	NCI_Calcineurin_regulated_NFAT_dependent_transcription_in_lymphocytes_Main_Pathway	NA	NA	NA	NA	NA	NCI_Calcineurin_regulated_NFAT_dependent_transcription_in_lymphocytes_Pathway_(T_cell_anergy)	NA	NA	NA	NA	NA
NCI_Arf6_downstream_Pathway_(Tumor_Cell_Invasion)	NCI_Ephrin_A_reverse_signaling_Pathway_(neuron_projection_morphogenesis)	NCI_Calcineurin_regulated_NFAT_dependent_transcription_in_lymphocytes_Main_Pathway	NCI_Calcineurin_regulated_NFAT_dependent_transcription_in_lymphocytes_Pathway_(T_cell_anergy)	NA	NA	NA	NA	NA	NCI_Regulation_of_Androgen_receptor_activity_Pathway_(Pathway_positive_regulation_of_transcription_via_GATA2)	NA	NA	NA	NA	NA
NCI_LKB1_signaling_events_Pathway_(chromatin_remodeling)	NCI_PLK1_signaling_events_Pathway_(chromosome_segregation)	NCI_Calcineurin_regulated_NFAT_dependent_transcription_in_lymphocytes_Pathway_(T_cell_anergy)	NCI_Regulation_of_Androgen_receptor_activity_Pathway_(Pathway_positive_regulation_of_transcription_via_GATA2)	NA	NA	NA	NA	NA	reactome_PERK_regulates_gene_expression_Main_Pathway	NA	NA	NA	NA	NA
NCI_Signaling_events_mediated_by_Stem_cell_factor_receptor_c_Kit__Pathway_(Pathway_positive_regulation_of_transcription_via_MAPK3)	NCI_PLK1_signaling_events_Pathway_(Golgi_organization)	NCI_Regulation_of_Androgen_receptor_activity_Pathway_(Pathway_positive_regulation_of_transcription_via_GATA2)	reactome_ATF6_alpha_activates_chaperone_genes_Main_Pathway	NA	NA	NA	NA	NA	NA	NA	NA	NA	NA	NA
PAK_Pathway_Paxillin_Disassembly	NCI_PLK1_signaling_events_Pathway_(regulation_of_mitotic_centrosome_separation)	NCI_Signaling_events_mediated_by_focal_adhesion_kinase_Pathway_(regulation_of_cell_cycle)	reactome_ATF6_alpha_activates_chaperones_Main_Pathway	NA	NA	NA	NA	NA	NA	NA	NA	NA	NA	NA
reactome_p53_Dependent_G1_DNA_Damage_Response_Main_Pathway	NCI_PLK1_signaling_events_Pathway_(spindle_elongation)	NCI_Validated_transcriptional_targets_of_AP1_family_members_Fra1_and_Fra2_Main_Pathway	reactome_PERK_regulates_gene_expression_Main_Pathway	NA	NA	NA	NA	NA	NA	NA	NA	NA	NA	NA
NA	NCI_PLK1_signaling_events_Pathway_(spindle_stabilization)	reactome_Activation_of_the_pre_replicative_complex_Main_Pathway	NA	NA	NA	NA	NA	NA	NA	NA	NA	NA	NA	NA
NA	NCI_Regulation_of_Androgen_receptor_activity_Pathway_(Pathway_positive_regulation_of_transcription_via_GATA2)	reactome_Assembly_of_the_RAD51_ssDNA_nucleoprotein_complex_Main_Pathway	NA	NA	NA	NA	NA	NA	NA	NA	NA	NA	NA	NA
NA	PAK_Pathway_Paxillin_Disassembly	reactome_CDC6_association_with_the_ORC_origin_complex_Main_Pathway	NA	NA	NA	NA	NA	NA	NA	NA	NA	NA	NA	NA
NA	reactome_cell_division_Main_Pathway	reactome_CHL1_interactions_Main_Pathway	NA	NA	NA	NA	NA	NA	NA	NA	NA	NA	NA	NA
NA	NA	reactome_Cyclin_E_associated_events_during_G1_S_transition_Main_Pathway	NA	NA	NA	NA	NA	NA	NA	NA	NA	NA	NA	NA
NA	NA	reactome_Inflammasomes_Main_Pathway	NA	NA	NA	NA	NA	NA	NA	NA	NA	NA	NA	NA
NA	NA	reactome_PERK_regulates_gene_expression_Main_Pathway	NA	NA	NA	NA	NA	NA	NA	NA	NA	NA	NA	NA
NA	NA	reactome_Presynaptic_phase_of_homologous_DNA_pairing_and_strand_exchange_Main_Pathway	NA	NA	NA	NA	NA	NA	NA	NA	NA	NA	NA	NA
NA	NA	reactome_Processing_of_DNA_double_strand_break_ends_Main_Pathway	NA	NA	NA	NA	NA	NA	NA	NA	NA	NA	NA	NA
NA	NA	reactome_Switching_of_origins_to_a_post_replicative_state_Main_Pathway	NA	NA	NA	NA	NA	NA	NA	NA	NA	NA	NA	NA
NA	NA	reactome_Unwinding_of_DNA_Main_Pathway	NA	NA	NA	NA	NA	NA	NA	NA	NA	NA	NA	NA

## Sheet: GSE59861_24h_EMTAB2086
X1_sets_EMTAB2086_70_vs_30	X1_sets_EMTAB2086_80_vs_30	X1_sets_GSE59861_24h_2Gy	X1_sets_GSE59861_24h_5cGy	X2_sets_EMTAB2086_70_vs_30_EMTAB2086_80_vs_30	X2_sets_EMTAB2086_70_vs_30_GSE59861_24h_2Gy	X2_sets_EMTAB2086_70_vs_30_GSE59861_24h_5cGy	X2_sets_EMTAB2086_80_vs_30_GSE59861_24h_2Gy	X2_sets_EMTAB2086_80_vs_30_GSE59861_24h_5cGy	X2_sets_GSE59861_24h_2Gy_GSE59861_24h_5cGy	X3_sets_EMTAB2086_70_vs_30_EMTAB2086_80_vs_30_GSE59861_24h_2Gy	X3_sets_EMTAB2086_70_vs_30_EMTAB2086_80_vs_30_GSE59861_24h_5cGy	X3_sets_EMTAB2086_70_vs_30_GSE59861_24h_2Gy_GSE59861_24h_5cGy	X3_sets_EMTAB2086_80_vs_30_GSE59861_24h_2Gy_GSE59861_24h_5cGy	X4_sets_EMTAB2086_70_vs_30_EMTAB2086_80_vs_30_GSE59861_24h_2Gy_GSE59861_24h_5cGy
Akt_Signaling_Pathway_Cell_Cycle_Progression	AHR_Pathway_CYP1A1_CYP1B1_CYP1A2_AHRR_gene_expression_via_POLR2B	ATM_Pathway_DNA_repair	EGF_Pathway_Cell_Motility	Akt_Signaling_Pathway_Regulation_of_Cyclic_Nucleotide	ATM_Pathway_DNA_repair	EGF_Pathway_Rab5_Regulation_Pathway	ATM_Pathway_DNA_repair	EGF_Pathway_Rab5_Regulation_Pathway	EGF_Pathway_Cell_Motility	ATM_Pathway_DNA_repair	EGF_Pathway_Rab5_Regulation_Pathway	NCI_BARD1_signaling_events_Pathway_(DNA_repair)	NCI_BARD1_signaling_events_Pathway_(DNA_repair)	NCI_BARD1_signaling_events_Pathway_(DNA_repair)
Akt_Signaling_Pathway_Regulation_of_Cyclic_Nucleotide	Akt_Signaling_Pathway_Acetylation_of_proteins	ATM_Pathway_Repair_and_Recombination	EGF_Pathway_Rab5_Regulation_Pathway	ATM_Pathway_DNA_repair	ATM_Pathway_Repair_and_Recombination	NCI_BARD1_signaling_events_Pathway_(DNA_repair)	ATM_Pathway_Repair_and_Recombination	KEGG_Lysine_biosynthesis_Main_Pathway	NCI_BARD1_signaling_events_Pathway_(DNA_repair)	ATM_Pathway_Repair_and_Recombination	NCI_BARD1_signaling_events_Pathway_(DNA_repair)	NCI_BARD1_signaling_events_Pathway_(protein_ubiquitination)	NCI_BARD1_signaling_events_Pathway_(protein_ubiquitination)	NCI_BARD1_signaling_events_Pathway_(protein_ubiquitination)
ATM_Pathway_DNA_repair	Akt_Signaling_Pathway_AR_mediated_apoptosis	ATM_Pathway_S-phase_progression	KEGG_Lysine_biosynthesis_Main_Pathway	ATM_Pathway_Repair_and_Recombination	BRCA1_Pathway_Mismatch_Repair	NCI_BARD1_signaling_events_Pathway_(protein_ubiquitination)	ATM_Pathway_S-phase_progression	NCI_BARD1_signaling_events_Pathway_(DNA_repair)	NCI_BARD1_signaling_events_Pathway_(protein_ubiquitination)	BRCA1_Pathway_Mismatch_Repair	NCI_BARD1_signaling_events_Pathway_(protein_ubiquitination)	NCI_Regulation_of_Androgen_receptor_activity_Pathway_(Pathway_positive_regulation_of_transcription_via_GATA2)	NCI_Regulation_of_Androgen_receptor_activity_Pathway_(Pathway_positive_regulation_of_transcription_via_GATA2)	NCI_Regulation_of_Androgen_receptor_activity_Pathway_(Pathway_positive_regulation_of_transcription_via_GATA2)
ATM_Pathway_Repair_and_Recombination	Akt_Signaling_Pathway_Regulation_of_Cyclic_Nucleotide	BRCA1_Pathway_Base_Excission_Repair	NCI_BARD1_signaling_events_Pathway_(DNA_repair)	ATM_Pathway_S-phase_arrest	KEGG_DNA_replication_Main_Pathway	NCI_Regulation_of_Androgen_receptor_activity_Pathway_(Pathway_positive_regulation_of_transcription_via_GATA2)	BRCA1_Pathway_Base_Excission_Repair	NCI_BARD1_signaling_events_Pathway_(protein_ubiquitination)	NCI_Regulation_of_Androgen_receptor_activity_Pathway_(Pathway_positive_regulation_of_transcription_via_GATA2)	KEGG_DNA_replication_Main_Pathway	NCI_Regulation_of_Androgen_receptor_activity_Pathway_(Pathway_positive_regulation_of_transcription_via_GATA2)	reactome_Activation_of_the_pre_replicative_complex_Main_Pathway	reactome_Activation_of_the_pre_replicative_complex_Main_Pathway	reactome_Activation_of_the_pre_replicative_complex_Main_Pathway
ATM_Pathway_S-phase_arrest	Akt_Signaling_Pathway_Synaptic_Transmission	BRCA1_Pathway_Mismatch_Repair	NCI_BARD1_signaling_events_Pathway_(protein_ubiquitination)	BRCA1_Pathway	KEGG_Mismatch_repair_Main_Pathway	reactome_Activation_of_the_pre_replicative_complex_Main_Pathway	BRCA1_Pathway_Mismatch_Repair	NCI_Regulation_of_Androgen_receptor_activity_Pathway_(Pathway_positive_regulation_of_transcription_via_GATA2)	NCI_Signaling_events_mediated_by_VEGFR1_and_VEGFR2_Pathway_(focal_adhesion_assembly)	KEGG_Mismatch_repair_Main_Pathway	reactome_Activation_of_the_pre_replicative_complex_Main_Pathway	reactome_CDC6_association_with_the_ORC_origin_complex_Main_Pathway	reactome_CDC6_association_with_the_ORC_origin_complex_Main_Pathway	reactome_CDC6_association_with_the_ORC_origin_complex_Main_Pathway
BRCA1_Pathway	ATM_Pathway_Apoptosis_and_Senescence	BRCA1_Pathway_Nucleotide_Excission_Repair	NCI_CDC42_signaling_events_Pathway_(cell_proliferation)	BRCA1_Pathway_Growth_Promoting_Genes_hTert_S100A7	KEGG_Pyrimidine_metabolism_Main_Pathway	reactome_CDC6_association_with_the_ORC_origin_complex_Main_Pathway	BRCA1_Pathway_Nucleotide_Excission_Repair	NCI_Signaling_events_mediated_by_TCPTP_Pathway_(regulation_of_gluconeogenesis)	reactome_Activation_of_the_pre_replicative_complex_Main_Pathway	KEGG_Pyrimidine_metabolism_Main_Pathway	reactome_CDC6_association_with_the_ORC_origin_complex_Main_Pathway	reactome_DNA_replication_initiation_Main_Pathway	reactome_DNA_replication_initiation_Main_Pathway	reactome_DNA_replication_initiation_Main_Pathway
BRCA1_Pathway_Growth_Promoting_Genes_hTert_S100A7	ATM_Pathway_DNA_repair	EGF_Pathway_Cell_Motility	NCI_CDC42_signaling_events_Pathway_(cytokinesis)	BRCA1_Pathway_Homologous_Recombination_Repair	Mismatch_Repair_in_Eukaryotes_Pathway	reactome_DNA_replication_initiation_Main_Pathway	KEGG_DNA_replication_Main_Pathway	reactome_Activation_of_the_pre_replicative_complex_Main_Pathway	reactome_CDC6_association_with_the_ORC_origin_complex_Main_Pathway	Mismatch_Repair_in_Eukaryotes_Pathway	reactome_DNA_replication_initiation_Main_Pathway	reactome_Removal_of_DNA_patch_containing_abasic_residue_Main_Pathway	reactome_Metabolism_of_polyamines_Main_Pathway	reactome_Removal_of_DNA_patch_containing_abasic_residue_Main_Pathway
BRCA1_Pathway_Homologous_Recombination_Repair	ATM_Pathway_Repair_and_Recombination	KEGG_DNA_replication_Main_Pathway	NCI_RAC1_signaling_Pathway_(positive_regulation_of_Wnt_receptor_signaling_pathway)	BRCA1_Pathway_Mismatch_Repair	NCI_ATM_Pathway_(G2_M_transition_checkpoint)	reactome_Removal_of_DNA_patch_containing_abasic_residue_Main_Pathway	KEGG_Mismatch_repair_Main_Pathway	reactome_CDC6_association_with_the_ORC_origin_complex_Main_Pathway	reactome_DNA_replication_initiation_Main_Pathway	NCI_ATM_Pathway_(G2_M_transition_checkpoint)	reactome_Removal_of_DNA_patch_containing_abasic_residue_Main_Pathway	reactome_Switching_of_origins_to_a_post_replicative_state_Main_Pathway	reactome_Phosphorylation_of_proteins_involved_in_G1_S_transition_by_active_Cyclin_E_Cdk2_complexes_Main_Pathway	reactome_Switching_of_origins_to_a_post_replicative_state_Main_Pathway
BRCA1_Pathway_Mismatch_Repair	ATM_Pathway_S-phase_arrest	KEGG_Mismatch_repair_Main_Pathway	NCI_Ras_signaling_in_the_CD4_TCR_Main_Pathway	Cellular_Apoptosis_Pathway_Depolarization	NCI_ATR_signaling_Main_Pathway	reactome_Switching_of_origins_to_a_post_replicative_state_Main_Pathway	KEGG_Pyrimidine_metabolism_Main_Pathway	reactome_DNA_replication_initiation_Main_Pathway	reactome_Metabolism_of_polyamines_Main_Pathway	NCI_ATR_signaling_Main_Pathway	reactome_Switching_of_origins_to_a_post_replicative_state_Main_Pathway	reactome_Telomere_C_strand_synthesis_initiation_Main_Pathway	reactome_Removal_of_DNA_patch_containing_abasic_residue_Main_Pathway	reactome_Telomere_C_strand_synthesis_initiation_Main_Pathway
Cellular_Apoptosis_Pathway_Depolarization	ATM_Pathway_S-phase_progression	KEGG_Pyrimidine_metabolism_Main_Pathway	NCI_Regulation_of_Androgen_receptor_activity_Pathway_(Pathway_positive_regulation_of_transcription_via_GATA2)	Cellular_Apoptosis_Pathway_Gene_Expression_BAX_BID_BAK_Ras_Noxa_PUMA_APAF1_Survivin_BCL2_via_TP53	NCI_ATR_signaling_Pathway_(regulation_of_double_strand_break_repair_via_homologous_recombination)	reactome_Telomere_C_strand_synthesis_initiation_Main_Pathway	MAPK_Signaling_Pathway_Cell_Survival	reactome_Metabolism_of_polyamines_Main_Pathway	reactome_Phosphorylation_of_proteins_involved_in_G1_S_transition_by_active_Cyclin_E_Cdk2_complexes_Main_Pathway	NCI_ATR_signaling_Pathway_(regulation_of_double_strand_break_repair_via_homologous_recombination)	reactome_Telomere_C_strand_synthesis_initiation_Main_Pathway	reactome_Unwinding_of_DNA_Main_Pathway	reactome_Switching_of_origins_to_a_post_replicative_state_Main_Pathway	reactome_Unwinding_of_DNA_Main_Pathway
Cellular_Apoptosis_Pathway_Gene_Expression_BAX_BID_BAK_Ras_Noxa_PUMA_APAF1_Survivin_BCL2_via_TP53	BRCA1_Pathway	MAPK_Signaling_Pathway_Cell_Survival	NCI_Regulation_of_nuclear_beta_catenin_signaling_and_target_gene_transcription_Main_Pathway	EGF_Pathway_Rab5_Regulation_Pathway	NCI_ATR_signaling_Pathway_(response_to_G2_M_transition_DNA_damage_checkpoint_signal)	reactome_Unwinding_of_DNA_Main_Pathway	Mismatch_Repair_in_Eukaryotes_Pathway	reactome_Phosphorylation_of_proteins_involved_in_G1_S_transition_by_active_Cyclin_E_Cdk2_complexes_Main_Pathway	reactome_Removal_of_DNA_patch_containing_abasic_residue_Main_Pathway	NCI_ATR_signaling_Pathway_(response_to_G2_M_transition_DNA_damage_checkpoint_signal)	reactome_Unwinding_of_DNA_Main_Pathway	NA	reactome_Telomere_C_strand_synthesis_initiation_Main_Pathway	NA
EGF_Pathway_Rab5_Regulation_Pathway	BRCA1_Pathway_Base_Excission_Repair	Mismatch_Repair_in_Eukaryotes_Pathway	NCI_RhoA_signaling_Pathway_(Pathway_positive_regulation_of_NF_kappaB_transcription_factor_activity_via_RHOA)	IL-2_Pathway_Apoptosis	NCI_Aurora_A_signaling_Pathway_(regulation_of_centrosome_cycle)	NA	NCI_ATM_Pathway_(G2_M_transition_checkpoint)	reactome_Removal_of_DNA_patch_containing_abasic_residue_Main_Pathway	reactome_Switching_of_origins_to_a_post_replicative_state_Main_Pathway	NCI_Aurora_A_signaling_Pathway_(regulation_of_centrosome_cycle)	NA	NA	reactome_Unwinding_of_DNA_Main_Pathway	NA
IL-2_Pathway_Apoptosis	BRCA1_Pathway_Cell_Cycle_Arrest_DNA_Repair_Genes_p21_WAF_CIP1_14-3-3_GADD45	NCI_ATM_Pathway_(G2_M_transition_checkpoint)	NCI_Signaling_events_mediated_by_TCPTP_Pathway_(regulation_of_gluconeogenesis)	Interferon_Pathway_Gene_Expression_via_HIST1H3B_CREB3	NCI_Aurora_B_signaling_Main_Pathway	NA	NCI_ATR_signaling_Main_Pathway	reactome_Switching_of_origins_to_a_post_replicative_state_Main_Pathway	reactome_Telomere_C_strand_synthesis_initiation_Main_Pathway	NCI_Aurora_B_signaling_Main_Pathway	NA	NA	NA	NA
Interferon_Pathway_Gene_Expression_via_HIST1H3B_CREB3	BRCA1_Pathway_Chromatin_Remodeling	NCI_ATR_signaling_Main_Pathway	NCI_Signaling_events_mediated_by_VEGFR1_and_VEGFR2_Pathway_(focal_adhesion_assembly)	IP3_Pathway_Gene_Expression_via_CREB3_NFATC2_MEF2D	NCI_Aurora_B_signaling_Pathway_(cytokinesis)	NA	NCI_ATR_signaling_Pathway_(regulation_of_double_strand_break_repair_via_homologous_recombination)	reactome_Telomere_C_strand_synthesis_initiation_Main_Pathway	reactome_Unwinding_of_DNA_Main_Pathway	NCI_Aurora_B_signaling_Pathway_(cytokinesis)	NA	NA	NA	NA
IP3_Pathway_Gene_Expression_via_CREB3_NFATC2_MEF2D	BRCA1_Pathway_E2_Responsive_Genes	NCI_ATR_signaling_Pathway_(regulation_of_double_strand_break_repair_via_homologous_recombination)	p38_Signaling_Pathway_Translation	KEGG_Basal_cell_carcinoma_Main_Pathway	NCI_Aurora_C_signaling_Main_Pathway	NA	NCI_ATR_signaling_Pathway_(response_to_G2_M_transition_DNA_damage_checkpoint_signal)	reactome_Unwinding_of_DNA_Main_Pathway	NA	NCI_Aurora_C_signaling_Main_Pathway	NA	NA	NA	NA
KEGG_Basal_cell_carcinoma_Main_Pathway	BRCA1_Pathway_G1_S_arrest	NCI_ATR_signaling_Pathway_(response_to_G2_M_transition_DNA_damage_checkpoint_signal)	reactome_Activation_of_the_pre_replicative_complex_Main_Pathway	KEGG_Base_excision_repair_Main_Pathway	NCI_BARD1_signaling_events_Main_Pathway	NA	NCI_Aurora_A_signaling_Pathway_(proteasomal_ubiquitin_dependent_protein_catabolic_process)	STAT3_Pathway_G1_to_S_Cell_Cycle_Progression	NA	NCI_BARD1_signaling_events_Main_Pathway	NA	NA	NA	NA
KEGG_Base_excision_repair_Main_Pathway	BRCA1_Pathway_Growth_Promoting_Genes_hTert_S100A7	NCI_Aurora_A_signaling_Pathway_(proteasomal_ubiquitin_dependent_protein_catabolic_process)	reactome_ATF6_alpha_activates_chaperone_genes_Main_Pathway	KEGG_Bile_secretion_Main_Pathway	NCI_BARD1_signaling_events_Pathway_(DNA_repair)	NA	NCI_Aurora_A_signaling_Pathway_(protein_catabolic_process)	NA	NA	NCI_BARD1_signaling_events_Pathway_(DNA_repair)	NA	NA	NA	NA
KEGG_Bile_secretion_Main_Pathway	BRCA1_Pathway_Homologous_Recombination_Repair	NCI_Aurora_A_signaling_Pathway_(protein_catabolic_process)	reactome_ATF6_alpha_activates_chaperones_Main_Pathway	KEGG_DNA_replication_Main_Pathway	NCI_BARD1_signaling_events_Pathway_(protein_ubiquitination)	NA	NCI_Aurora_A_signaling_Pathway_(regulation_of_centrosome_cycle)	NA	NA	NCI_BARD1_signaling_events_Pathway_(protein_ubiquitination)	NA	NA	NA	NA
KEGG_DNA_replication_Main_Pathway	BRCA1_Pathway_Mismatch_Repair	NCI_Aurora_A_signaling_Pathway_(regulation_of_centrosome_cycle)	reactome_CDC6_association_with_the_ORC_origin_complex_Main_Pathway	KEGG_Fanconi_anemia_Main_Pathway	NCI_Caspase_Cascade_in_Apoptosis_Pathway_(positive_regulation_of_apoptosis)	NA	NCI_Aurora_B_signaling_Main_Pathway	NA	NA	NCI_Caspase_Cascade_in_Apoptosis_Pathway_(positive_regulation_of_apoptosis)	NA	NA	NA	NA
KEGG_Fanconi_anemia_Main_Pathway	BRCA1_Pathway_NHEJ_DSB_Repair	NCI_Aurora_B_signaling_Main_Pathway	reactome_DNA_replication_initiation_Main_Pathway	KEGG_Fatty_acid_biosynthesis_Main_Pathway	NCI_Fanconi_anemia_Pathway_(DNA_repair)	NA	NCI_Aurora_B_signaling_Pathway_(cytokinesis)	NA	NA	NCI_Fanconi_anemia_Pathway_(DNA_repair)	NA	NA	NA	NA
KEGG_Fatty_acid_biosynthesis_Main_Pathway	BRCA1_Pathway_Nucleotide_Excission_Repair	NCI_Aurora_B_signaling_Pathway_(cytokinesis)	reactome_Metabolism_of_polyamines_Main_Pathway	KEGG_Hedgehog_signaling_Main_Pathway	NCI_Integrin_linked_kinase_signaling_Pathway_(centrosome_localization)	NA	NCI_Aurora_C_signaling_Main_Pathway	NA	NA	NCI_Integrin_linked_kinase_signaling_Pathway_(centrosome_localization)	NA	NA	NA	NA
KEGG_Hedgehog_signaling_Main_Pathway	BRCA1_Pathway_Transciption_Coupled_Repair	NCI_Aurora_C_signaling_Main_Pathway	reactome_PERK_regulates_gene_expression_Main_Pathway	KEGG_Homologous_recombination_Main_Pathway	NCI_PLK1_signaling_events_Pathway_(chromosome_segregation)	NA	NCI_BARD1_signaling_events_Main_Pathway	NA	NA	NCI_PLK1_signaling_events_Pathway_(chromosome_segregation)	NA	NA	NA	NA
KEGG_Homologous_recombination_Main_Pathway	Caspase_Cascade_Pathway	NCI_BARD1_signaling_events_Main_Pathway	reactome_Phosphorylation_of_proteins_involved_in_G1_S_transition_by_active_Cyclin_E_Cdk2_complexes_Main_Pathway	KEGG_Lipoic_acid_metabolism_Main_Pathway	NCI_PLK1_signaling_events_Pathway_(G2_M_transition_of_mitotic_cell_cycle)	NA	NCI_BARD1_signaling_events_Pathway_(DNA_repair)	NA	NA	NCI_PLK1_signaling_events_Pathway_(G2_M_transition_of_mitotic_cell_cycle)	NA	NA	NA	NA
KEGG_Inflammatory_bowel_disease_IBD__Main_Pathway	Caspase_Cascade_Pathway_Activated_Tissue_Trans-glutaminase	NCI_BARD1_signaling_events_Pathway_(DNA_repair)	reactome_Removal_of_DNA_patch_containing_abasic_residue_Main_Pathway	KEGG_Mismatch_repair_Main_Pathway	NCI_PLK1_signaling_events_Pathway_(Golgi_organization)	NA	NCI_BARD1_signaling_events_Pathway_(protein_ubiquitination)	NA	NA	NCI_PLK1_signaling_events_Pathway_(Golgi_organization)	NA	NA	NA	NA
KEGG_Lipoic_acid_metabolism_Main_Pathway	Caspase_Cascade_Pathway_DNA_Fragmentation	NCI_BARD1_signaling_events_Pathway_(protein_ubiquitination)	reactome_Switching_of_origins_to_a_post_replicative_state_Main_Pathway	KEGG_Non_homologous_end_joining_Main_Pathway	NCI_PLK1_signaling_events_Pathway_(proteasomal_ubiquitin_dependent_protein_catabolic_process)	NA	NCI_Caspase_Cascade_in_Apoptosis_Pathway_(positive_regulation_of_apoptosis)	NA	NA	NCI_PLK1_signaling_events_Pathway_(proteasomal_ubiquitin_dependent_protein_catabolic_process)	NA	NA	NA	NA
KEGG_Mismatch_repair_Main_Pathway	Cellular_Apoptosis_Pathway_Depolarization	NCI_Caspase_Cascade_in_Apoptosis_Pathway_(positive_regulation_of_apoptosis)	reactome_Synthesis_of_UDP_N_acetyl_glucosamine_Main_Pathway	KEGG_Nucleotide_excision_repair_Main_Pathway	NCI_PLK1_signaling_events_Pathway_(regulation_of_attachment_of_spindle_microtubules_to_kinetochore)	NA	NCI_Ephrin_B_reverse_signaling_Pathway_(endothelial_cell_proliferation)	NA	NA	NCI_PLK1_signaling_events_Pathway_(regulation_of_attachment_of_spindle_microtubules_to_kinetochore)	NA	NA	NA	NA
KEGG_Non_homologous_end_joining_Main_Pathway	Cellular_Apoptosis_Pathway_Gene_Expression_BAX_BID_BAK_Ras_Noxa_PUMA_APAF1_Survivin_BCL2_via_TP53	NCI_E_cadherin_signaling_in_keratinocytes_Pathway_(establishment_of_polarity_of_embryonic_epithelium)	reactome_Telomere_C_strand_synthesis_initiation_Main_Pathway	KEGG_One_carbon_pool_by_folate_Main_Pathway	NCI_PLK1_signaling_events_Pathway_(regulation_of_mitotic_centrosome_separation)	NA	NCI_Fanconi_anemia_Pathway_(DNA_repair)	NA	NA	NCI_PLK1_signaling_events_Pathway_(regulation_of_mitotic_centrosome_separation)	NA	NA	NA	NA
KEGG_Nucleotide_excision_repair_Main_Pathway	Chemokine_Pathway_Internalization_Degradation_Recycling	NCI_Ephrin_B_reverse_signaling_Pathway_(endothelial_cell_proliferation)	reactome_Unwinding_of_DNA_Main_Pathway	KEGG_Oocyte_meiosis_Main_Pathway	NCI_PLK1_signaling_events_Pathway_(spindle_elongation)	NA	NCI_IL2_mediated_signaling_events_Pathway_(G1_S_transition_of_mitotic_cell_cycle)	NA	NA	NCI_PLK1_signaling_events_Pathway_(spindle_elongation)	NA	NA	NA	NA
KEGG_One_carbon_pool_by_folate_Main_Pathway	Chromatin_Pathway	NCI_Fanconi_anemia_Pathway_(DNA_repair)	STAT3_Pathway_G1_to_S_Cell_Cycle_Progression	KEGG_Phenylalanine_metabolism_Main_Pathway	NCI_PLK1_signaling_events_Pathway_(spindle_stabilization)	NA	NCI_Integrin_linked_kinase_signaling_Pathway_(centrosome_localization)	NA	NA	NCI_PLK1_signaling_events_Pathway_(spindle_stabilization)	NA	NA	NA	NA
KEGG_Oocyte_meiosis_Main_Pathway	EGF_Pathway_Cell_Survival	NCI_IL2_mediated_signaling_events_Pathway_(G1_S_transition_of_mitotic_cell_cycle)	NA	KEGG_Pyrimidine_metabolism_Main_Pathway	NCI_PLK2_and_PLK4_events_Main_Pathway	NA	NCI_PLK1_signaling_events_Pathway_(chromosome_segregation)	NA	NA	NCI_PLK2_and_PLK4_events_Main_Pathway	NA	NA	NA	NA
KEGG_Phenylalanine_metabolism_Main_Pathway	EGF_Pathway_Rab5_Regulation_Pathway	NCI_Integrin_linked_kinase_signaling_Pathway_(centrosome_localization)	NA	KEGG_Tryptophan_metabolism_Main_Pathway	NCI_PLK2_and_PLK4_events_Pathway_(regulation_of_centriole_replication)	NA	NCI_PLK1_signaling_events_Pathway_(G2_M_transition_of_mitotic_cell_cycle)	NA	NA	NCI_PLK2_and_PLK4_events_Pathway_(regulation_of_centriole_replication)	NA	NA	NA	NA
KEGG_Pyrimidine_metabolism_Main_Pathway	ErbB_Family_Pathway	NCI_PLK1_signaling_events_Pathway_(chromosome_segregation)	NA	KEGG_Ubiquinone_and_other_terpenoid_quinone_biosynthesis_Main_Pathway	NCI_Regulation_of_Androgen_receptor_activity_Pathway_(Pathway_positive_regulation_of_transcription_via_GATA2)	NA	NCI_PLK1_signaling_events_Pathway_(Golgi_organization)	NA	NA	NCI_Regulation_of_Androgen_receptor_activity_Pathway_(Pathway_positive_regulation_of_transcription_via_GATA2)	NA	NA	NA	NA
KEGG_Sphingolipid_metabolism_Main_Pathway	ErbB_Family_Pathway_Gene_Expression_via_JUN_FOS_ELK1	NCI_PLK1_signaling_events_Pathway_(G2_M_transition_of_mitotic_cell_cycle)	NA	MAPK_Family_Pathway_Chromatin_Remodelling	reactome_Activation_of_ATR_in_response_to_replication_stress_Main_Pathway	NA	NCI_PLK1_signaling_events_Pathway_(proteasomal_ubiquitin_dependent_protein_catabolic_process)	NA	NA	reactome_Activation_of_ATR_in_response_to_replication_stress_Main_Pathway	NA	NA	NA	NA
KEGG_Tryptophan_metabolism_Main_Pathway	ERK_Signaling_Pathway_Cell_Survival	NCI_PLK1_signaling_events_Pathway_(Golgi_organization)	NA	Mismatch_Repair_in_Eukaryotes_Pathway	reactome_Activation_of_NOXA_and_translocation_to_mitochondria_Main_Pathway	NA	NCI_PLK1_signaling_events_Pathway_(regulation_of_attachment_of_spindle_microtubules_to_kinetochore)	NA	NA	reactome_Activation_of_NOXA_and_translocation_to_mitochondria_Main_Pathway	NA	NA	NA	NA
KEGG_Ubiquinone_and_other_terpenoid_quinone_biosynthesis_Main_Pathway	ERK_Signaling_Pathway_Gene_Expression_via_CAPN6_TP53_FOS_ATF1_MYC_ELK3_MYLK_ETS1_SRF_HIST1H3B_CREB3_STAT3_NFKB2_HMGN1_ESR2_ELK1_PAX6_JUN	NCI_PLK1_signaling_events_Pathway_(proteasomal_ubiquitin_dependent_protein_catabolic_process)	NA	NCI_ATM_Pathway_(chromatin_remodeling)	reactome_Activation_of_PUMA_and_translocation_to_mitochondria_Main_Pathway	NA	NCI_PLK1_signaling_events_Pathway_(regulation_of_mitotic_centrosome_separation)	NA	NA	reactome_Activation_of_PUMA_and_translocation_to_mitochondria_Main_Pathway	NA	NA	NA	NA
MAPK_Family_Pathway_Chromatin_Remodelling	ERK_Signaling_Pathway_Translation	NCI_PLK1_signaling_events_Pathway_(regulation_of_attachment_of_spindle_microtubules_to_kinetochore)	NA	NCI_ATM_Pathway_(double_strand_break_repair_via_nonhomologous_end_joining)	reactome_Activation_of_the_pre_replicative_complex_Main_Pathway	NA	NCI_PLK1_signaling_events_Pathway_(spindle_elongation)	NA	NA	reactome_Activation_of_the_pre_replicative_complex_Main_Pathway	NA	NA	NA	NA
Mismatch_Repair_in_Eukaryotes_Pathway	Erythropoietin_Pathway	NCI_PLK1_signaling_events_Pathway_(regulation_of_mitotic_centrosome_separation)	NA	NCI_ATM_Pathway_(G2_M_transition_checkpoint)	reactome_Assembly_of_the_RAD51_ssDNA_nucleoprotein_complex_Main_Pathway	NA	NCI_PLK1_signaling_events_Pathway_(spindle_stabilization)	NA	NA	reactome_Assembly_of_the_RAD51_ssDNA_nucleoprotein_complex_Main_Pathway	NA	NA	NA	NA
NCI_ATM_Pathway_(chromatin_remodeling)	Erythropoietin_Pathway_Cell_Cycle_Progression	NCI_PLK1_signaling_events_Pathway_(spindle_elongation)	NA	NCI_ATM_Pathway_(Pathway_rRNA_transcription_via_ATM)	reactome_ATM_mediated_phosphorylation_of_repair_proteins_Main_Pathway	NA	NCI_PLK2_and_PLK4_events_Main_Pathway	NA	NA	reactome_ATM_mediated_phosphorylation_of_repair_proteins_Main_Pathway	NA	NA	NA	NA
NCI_ATM_Pathway_(double_strand_break_repair_via_nonhomologous_end_joining)	Erythropoietin_Pathway_Cell_Survival	NCI_PLK1_signaling_events_Pathway_(spindle_stabilization)	NA	NCI_ATR_signaling_Main_Pathway	reactome_CDC6_association_with_the_ORC_origin_complex_Main_Pathway	NA	NCI_PLK2_and_PLK4_events_Pathway_(regulation_of_centriole_replication)	NA	NA	reactome_CDC6_association_with_the_ORC_origin_complex_Main_Pathway	NA	NA	NA	NA
NCI_ATM_Pathway_(G2_M_transition_checkpoint)	Estrogen_Pathway_Gene_Expression_via_FOS_JUN_ELK1_SP1_POLR2B_CREB3_NFKB2	NCI_PLK2_and_PLK4_events_Main_Pathway	NA	NCI_ATR_signaling_Pathway_(Pathway_negative_regulation_of_transcription_during_mitosis_via_CHEK1)	reactome_cell_division_Main_Pathway	NA	NCI_Regulation_of_Androgen_receptor_activity_Pathway_(Pathway_positive_regulation_of_transcription_via_GATA2)	NA	NA	reactome_cell_division_Main_Pathway	NA	NA	NA	NA
NCI_ATM_Pathway_(Pathway_rRNA_transcription_via_ATM)	FLT3_Signaling_Pathway	NCI_PLK2_and_PLK4_events_Pathway_(regulation_of_centriole_replication)	NA	NCI_ATR_signaling_Pathway_(regulation_of_double_strand_break_repair_via_homologous_recombination)	reactome_Chk1_Chk2_Cds1_mediated_inactivation_of_Cyclin_B_Cdk1_complex_Main_Pathway	NA	reactome_Activation_of_ATR_in_response_to_replication_stress_Main_Pathway	NA	NA	reactome_Chk1_Chk2_Cds1_mediated_inactivation_of_Cyclin_B_Cdk1_complex_Main_Pathway	NA	NA	NA	NA
NCI_ATR_signaling_Main_Pathway	FLT3_Signaling_Pathway_Transcription_via_ELK3_MAPK12_CREB3_STAT2	NCI_Regulation_of_Androgen_receptor_activity_Pathway_(Pathway_positive_regulation_of_transcription_via_GATA2)	NA	NCI_ATR_signaling_Pathway_(response_to_G2_M_transition_DNA_damage_checkpoint_signal)	reactome_Cyclin_A_Cdk2_associated_events_at_S_phase_entry_Main_Pathway	NA	reactome_Activation_of_NOXA_and_translocation_to_mitochondria_Main_Pathway	NA	NA	reactome_Cyclin_A_Cdk2_associated_events_at_S_phase_entry_Main_Pathway	NA	NA	NA	NA
NCI_ATR_signaling_Pathway_(Pathway_negative_regulation_of_transcription_during_mitosis_via_CHEK1)	Glucocorticoid_Receptor_Signaling_Pathway	NCI_Signaling_events_mediated_by_VEGFR1_and_VEGFR2_Pathway_(focal_adhesion_assembly)	NA	NCI_Atypical_NF_kappaB_Pathway_(Pathway_degradation_of_NFKB1_NFKBIA)	reactome_Cyclin_B2_mediated_events_Main_Pathway	NA	reactome_Activation_of_PUMA_and_translocation_to_mitochondria_Main_Pathway	NA	NA	reactome_Cyclin_B2_mediated_events_Main_Pathway	NA	NA	NA	NA
NCI_ATR_signaling_Pathway_(regulation_of_double_strand_break_repair_via_homologous_recombination)	Glucocorticoid_Receptor_Signaling_Pathway_Cell_Cycle_Progression	reactome_Activation_of_ATR_in_response_to_replication_stress_Main_Pathway	NA	NCI_Atypical_NF_kappaB_Pathway_(Pathway_degradation_of_NFKBIA)	reactome_Deposition_of_new_CENPA_containing_nucleosomes_at_the_centromere_Main_Pathway	NA	reactome_Activation_of_the_pre_replicative_complex_Main_Pathway	NA	NA	reactome_Deposition_of_new_CENPA_containing_nucleosomes_at_the_centromere_Main_Pathway	NA	NA	NA	NA
NCI_ATR_signaling_Pathway_(response_to_G2_M_transition_DNA_damage_checkpoint_signal)	Glucocorticoid_Receptor_Signaling_Pathway_Gene_Expression_via_CREB3_STAT5B_SLC22A2_POU2F1	reactome_Activation_of_NOXA_and_translocation_to_mitochondria_Main_Pathway	NA	NCI_Atypical_NF_kappaB_Pathway_(positive_regulation_of_anti_apoptosis)	reactome_DNA_replication_initiation_Main_Pathway	NA	reactome_Assembly_of_the_RAD51_ssDNA_nucleoprotein_complex_Main_Pathway	NA	NA	reactome_DNA_replication_initiation_Main_Pathway	NA	NA	NA	NA
NCI_Atypical_NF_kappaB_Pathway_(Pathway_degradation_of_NFKB1_NFKBIA)	Glucocorticoid_Receptor_Signaling_Pathway_Histone_Deacetylation	reactome_Activation_of_PUMA_and_translocation_to_mitochondria_Main_Pathway	NA	NCI_Aurora_A_signaling_Pathway_(regulation_of_centrosome_cycle)	reactome_E2F_enabled_inhibition_of_pre_replication_complex_formation_Main_Pathway	NA	reactome_ATM_mediated_phosphorylation_of_repair_proteins_Main_Pathway	NA	NA	reactome_E2F_enabled_inhibition_of_pre_replication_complex_formation_Main_Pathway	NA	NA	NA	NA
NCI_Atypical_NF_kappaB_Pathway_(Pathway_degradation_of_NFKBIA)	Glucocorticoid_Receptor_Signaling_Pathway_Inflammatory_Cytokines	reactome_Activation_of_the_pre_replicative_complex_Main_Pathway	NA	NCI_Aurora_B_signaling_Main_Pathway	reactome_E2F_mediated_regulation_of_DNA_replication_Main_Pathway	NA	reactome_CDC6_association_with_the_ORC_origin_complex_Main_Pathway	NA	NA	reactome_E2F_mediated_regulation_of_DNA_replication_Main_Pathway	NA	NA	NA	NA
NCI_Atypical_NF_kappaB_Pathway_(positive_regulation_of_anti_apoptosis)	GPCR_Pathway	reactome_Assembly_of_the_RAD51_ssDNA_nucleoprotein_complex_Main_Pathway	NA	NCI_Aurora_B_signaling_Pathway_(cytokinesis)	reactome_Early_Phase_of_HIV_Life_Cycle_Main_Pathway	NA	reactome_CDT1_association_with_the_CDC6_ORC_origin_complex_Main_Pathway	NA	NA	reactome_Early_Phase_of_HIV_Life_Cycle_Main_Pathway	NA	NA	NA	NA
NCI_Aurora_A_signaling_Pathway_(regulation_of_centrosome_cycle)	GPCR_Pathway_Gene_Expression_via_JUN_NFKB2_ELK1_SRF_FOS_CREB3	reactome_ATM_mediated_phosphorylation_of_repair_proteins_Main_Pathway	NA	NCI_Aurora_C_signaling_Main_Pathway	reactome_ERK1_activation_Main_Pathway	NA	reactome_cell_division_Main_Pathway	NA	NA	reactome_ERK1_activation_Main_Pathway	NA	NA	NA	NA
NCI_Aurora_B_signaling_Main_Pathway	GSK3_Signaling_Pathway	reactome_CDC6_association_with_the_ORC_origin_complex_Main_Pathway	NA	NCI_BARD1_signaling_events_Main_Pathway	reactome_G1_S_Specific_Transcription_Main_Pathway	NA	reactome_Chk1_Chk2_Cds1_mediated_inactivation_of_Cyclin_B_Cdk1_complex_Main_Pathway	NA	NA	reactome_G1_S_Specific_Transcription_Main_Pathway	NA	NA	NA	NA
NCI_Aurora_B_signaling_Pathway_(cytokinesis)	GSK3_Signaling_Pathway_Glycogen_Synthesis	reactome_CDT1_association_with_the_CDC6_ORC_origin_complex_Main_Pathway	NA	NCI_BARD1_signaling_events_Pathway_(DNA_damage_checkpoint)	reactome_G2_M_DNA_replication_checkpoint_Main_Pathway	NA	reactome_Cyclin_A_Cdk2_associated_events_at_S_phase_entry_Main_Pathway	NA	NA	reactome_G2_M_DNA_replication_checkpoint_Main_Pathway	NA	NA	NA	NA
NCI_Aurora_C_signaling_Main_Pathway	HGF_Pathway	reactome_cell_division_Main_Pathway	NA	NCI_BARD1_signaling_events_Pathway_(DNA_repair)	reactome_G2_Phase_Main_Pathway	NA	reactome_Cyclin_B2_mediated_events_Main_Pathway	NA	NA	reactome_G2_Phase_Main_Pathway	NA	NA	NA	NA
NCI_BARD1_signaling_events_Main_Pathway	HGF_Pathway_IP3_Pathway	reactome_Chk1_Chk2_Cds1_mediated_inactivation_of_Cyclin_B_Cdk1_complex_Main_Pathway	NA	NCI_BARD1_signaling_events_Pathway_(protein_ubiquitination)	reactome_Inactivation_of_APC_C_via_direct_inhibition_of_the_APC_C_complex_Main_Pathway	NA	reactome_Cyclin_E_associated_events_during_G1_S_transition_Main_Pathway	NA	NA	reactome_Inactivation_of_APC_C_via_direct_inhibition_of_the_APC_C_complex_Main_Pathway	NA	NA	NA	NA
NCI_BARD1_signaling_events_Pathway_(DNA_damage_checkpoint)	HIF1Alpha_Pathway	reactome_Cyclin_A_Cdk2_associated_events_at_S_phase_entry_Main_Pathway	NA	NCI_Caspase_Cascade_in_Apoptosis_Pathway_(actin_filament_polymerization)	reactome_Inhibition_of_replication_initiation_of_damaged_DNA_by_RB1_E2F1_Main_Pathway	NA	reactome_Deposition_of_new_CENPA_containing_nucleosomes_at_the_centromere_Main_Pathway	NA	NA	reactome_Inhibition_of_replication_initiation_of_damaged_DNA_by_RB1_E2F1_Main_Pathway	NA	NA	NA	NA
NCI_BARD1_signaling_events_Pathway_(DNA_repair)	HIF1Alpha_Pathway_p53_Hypoxia_Pathway	reactome_Cyclin_B2_mediated_events_Main_Pathway	NA	NCI_Caspase_Cascade_in_Apoptosis_Pathway_(DNA_repair)	reactome_Leading_Strand_Synthesis_Main_Pathway	NA	reactome_DNA_replication_initiation_Main_Pathway	NA	NA	reactome_Leading_Strand_Synthesis_Main_Pathway	NA	NA	NA	NA
NCI_BARD1_signaling_events_Pathway_(protein_ubiquitination)	IGF1R_Signaling_Pathway_Apoptosis	reactome_Cyclin_E_associated_events_during_G1_S_transition_Main_Pathway	NA	NCI_Caspase_Cascade_in_Apoptosis_Pathway_(positive_regulation_of_apoptosis)	reactome_Orc1_removal_from_chromatin_Main_Pathway	NA	reactome_E2F_enabled_inhibition_of_pre_replication_complex_formation_Main_Pathway	NA	NA	reactome_Orc1_removal_from_chromatin_Main_Pathway	NA	NA	NA	NA
NCI_Caspase_Cascade_in_Apoptosis_Pathway_(actin_filament_polymerization)	IGF1R_Signaling_Pathway_Cell_Proliferation_Diferentiation_and_Apoptosis	reactome_Deposition_of_new_CENPA_containing_nucleosomes_at_the_centromere_Main_Pathway	NA	NCI_Circadian_rhythm_Main_Pathway	reactome_Phosphorylation_of_Emi1_Main_Pathway	NA	reactome_E2F_mediated_regulation_of_DNA_replication_Main_Pathway	NA	NA	reactome_Phosphorylation_of_Emi1_Main_Pathway	NA	NA	NA	NA
NCI_Caspase_Cascade_in_Apoptosis_Pathway_(DNA_repair)	IGF1R_Signaling_Pathway_Gene_Expression_Proliferation_Growth_Survival_via_NFAT5_CREB3	reactome_DNA_replication_initiation_Main_Pathway	NA	NCI_Circadian_rhythm_Pathway_(chromatin_modification)	reactome_Phosphorylation_of_proteins_involved_in_the_G2_M_transition_by_Cyclin_A_Cdc2_complexes_Main_Pathway	NA	reactome_Early_Phase_of_HIV_Life_Cycle_Main_Pathway	NA	NA	reactome_Phosphorylation_of_proteins_involved_in_the_G2_M_transition_by_Cyclin_A_Cdc2_complexes_Main_Pathway	NA	NA	NA	NA
NCI_Caspase_Cascade_in_Apoptosis_Pathway_(positive_regulation_of_apoptosis)	IL-10_Pathway	reactome_E2F_enabled_inhibition_of_pre_replication_complex_formation_Main_Pathway	NA	NCI_Circadian_rhythm_Pathway_(S_phase_of_mitotic_cell_cycle)	reactome_Polymerase_switching_Main_Pathway	NA	reactome_ERK1_activation_Main_Pathway	NA	NA	reactome_Polymerase_switching_Main_Pathway	NA	NA	NA	NA
NCI_Circadian_rhythm_Main_Pathway	IL-10_Pathway_IL-10_Responsive_Genes_Transcription_of_BCLXL_Cyclin-D1_D2_D3_Pim1_c-Myc_and_P19(INK4D)_via_STAT3	reactome_E2F_mediated_regulation_of_DNA_replication_Main_Pathway	NA	NCI_Class_IB_PI3K_non_lipid_kinase_events_Pathway_(cAMP_biosynthetic_process)	reactome_Polymerase_switching_on_the_C_strand_of_the_telomere_Main_Pathway	NA	reactome_G1_S_Specific_Transcription_Main_Pathway	NA	NA	reactome_Polymerase_switching_on_the_C_strand_of_the_telomere_Main_Pathway	NA	NA	NA	NA
NCI_Circadian_rhythm_Pathway_(chromatin_modification)	IL-10_Pathway_Inflammatory_Cytokine_Genes_Expression_via_STAT3	reactome_Early_Phase_of_HIV_Life_Cycle_Main_Pathway	NA	NCI_DNA_PK_pathway_in_nonhomologous_end_joining_Main_Pathway	reactome_Presynaptic_phase_of_homologous_DNA_pairing_and_strand_exchange_Main_Pathway	NA	reactome_G2_M_DNA_replication_checkpoint_Main_Pathway	NA	NA	reactome_Presynaptic_phase_of_homologous_DNA_pairing_and_strand_exchange_Main_Pathway	NA	NA	NA	NA
NCI_Circadian_rhythm_Pathway_(S_phase_of_mitotic_cell_cycle)	IL-10_Pathway_Translational_Modulation	reactome_ERK1_activation_Main_Pathway	NA	NCI_DNA_PK_pathway_in_nonhomologous_end_joining_Pathway_(double_strand_break_repair_via_homologous_recombination)	reactome_Processive_synthesis_on_the_lagging_strand_Main_Pathway	NA	reactome_G2_Phase_Main_Pathway	NA	NA	reactome_Processive_synthesis_on_the_lagging_strand_Main_Pathway	NA	NA	NA	NA
NCI_Class_IB_PI3K_non_lipid_kinase_events_Pathway_(cAMP_biosynthetic_process)	IL-2_Pathway_Apoptosis	reactome_G1_S_Specific_Transcription_Main_Pathway	NA	NCI_DNA_PK_pathway_in_nonhomologous_end_joining_Pathway_(double_strand_break_repair_via_nonhomologous_end_joining)	reactome_Recruitment_of_repair_and_signaling_proteins_to_double_strand_breaks_Main_Pathway	NA	reactome_Inactivation_of_APC_C_via_direct_inhibition_of_the_APC_C_complex_Main_Pathway	NA	NA	reactome_Recruitment_of_repair_and_signaling_proteins_to_double_strand_breaks_Main_Pathway	NA	NA	NA	NA
NCI_DNA_PK_pathway_in_nonhomologous_end_joining_Main_Pathway	IL-2_Pathway_IL2_Gene_Expression_via_POLR1E_EGR1_HMGA1_ELF1_POU2F1_MYC	reactome_G2_M_DNA_replication_checkpoint_Main_Pathway	NA	NCI_DNA_PK_pathway_in_nonhomologous_end_joining_Pathway_(immunoglobulin_heavy_chain_V_D_J_recombination)	reactome_Removal_of_DNA_patch_containing_abasic_residue_Main_Pathway	NA	reactome_Inhibition_of_replication_initiation_of_damaged_DNA_by_RB1_E2F1_Main_Pathway	NA	NA	reactome_Removal_of_DNA_patch_containing_abasic_residue_Main_Pathway	NA	NA	NA	NA
NCI_DNA_PK_pathway_in_nonhomologous_end_joining_Pathway_(double_strand_break_repair_via_homologous_recombination)	ILK_Signaling_Pathway_Epithelial_Mesenchymal_Transition	reactome_G2_Phase_Main_Pathway	NA	NCI_DNA_PK_pathway_in_nonhomologous_end_joining_Pathway_(immunoglobulin_light_chain_V_J_recombination)	reactome_Removal_of_the_Flap_Intermediate_Main_Pathway	NA	reactome_Leading_Strand_Synthesis_Main_Pathway	NA	NA	reactome_Removal_of_the_Flap_Intermediate_Main_Pathway	NA	NA	NA	NA
NCI_DNA_PK_pathway_in_nonhomologous_end_joining_Pathway_(double_strand_break_repair_via_nonhomologous_end_joining)	Interferon_Pathway	reactome_Inactivation_of_APC_C_via_direct_inhibition_of_the_APC_C_complex_Main_Pathway	NA	NCI_DNA_PK_pathway_in_nonhomologous_end_joining_Pathway_(V_D_J_recombination)	reactome_Repair_synthesis_for_gap_filling_by_DNA_polymerase_in_TC_NER_Main_Pathway	NA	reactome_Metabolism_of_polyamines_Main_Pathway	NA	NA	reactome_Repair_synthesis_for_gap_filling_by_DNA_polymerase_in_TC_NER_Main_Pathway	NA	NA	NA	NA
NCI_DNA_PK_pathway_in_nonhomologous_end_joining_Pathway_(immunoglobulin_heavy_chain_V_D_J_recombination)	Interferon_Pathway_Gene_Expression_via_HIST1H3B_CREB3	reactome_Inhibition_of_replication_initiation_of_damaged_DNA_by_RB1_E2F1_Main_Pathway	NA	NCI_Endogenous_TLR_signaling_Pathway_(regulation_of_cell_adhesion)	reactome_Repair_synthesis_of_patch_27_30_bases_long_by_DNA_polymerase_Main_Pathway	NA	reactome_Orc1_removal_from_chromatin_Main_Pathway	NA	NA	reactome_Repair_synthesis_of_patch_27_30_bases_long_by_DNA_polymerase_Main_Pathway	NA	NA	NA	NA
NCI_DNA_PK_pathway_in_nonhomologous_end_joining_Pathway_(immunoglobulin_light_chain_V_J_recombination)	Interferon_Pathway_Translation	reactome_Leading_Strand_Synthesis_Main_Pathway	NA	NCI_Fanconi_anemia_Main_Pathway	reactome_Switching_of_origins_to_a_post_replicative_state_Main_Pathway	NA	reactome_p53_Dependent_G1_DNA_Damage_Response_Main_Pathway	NA	NA	reactome_Switching_of_origins_to_a_post_replicative_state_Main_Pathway	NA	NA	NA	NA
NCI_DNA_PK_pathway_in_nonhomologous_end_joining_Pathway_(V_D_J_recombination)	IP3_Pathway_Gene_Expression_via_CREB3_NFATC2_MEF2D	reactome_Metabolism_of_polyamines_Main_Pathway	NA	NCI_Fanconi_anemia_Pathway_(DNA_repair)	reactome_Telomere_C_strand_synthesis_initiation_Main_Pathway	NA	reactome_Phosphate_bond_hydrolysis_by_NUDT_proteins_Main_Pathway	NA	NA	reactome_Telomere_C_strand_synthesis_initiation_Main_Pathway	NA	NA	NA	NA
NCI_Effects_of_Botulinum_toxin_Main_Pathway	JAK-STAT_Pathway	reactome_Nicotinate_metabolism_Main_Pathway	NA	NCI_Fanconi_anemia_Pathway_(G1_S_transition_checkpoint)	reactome_Unwinding_of_DNA_Main_Pathway	NA	reactome_Phosphorylation_of_Emi1_Main_Pathway	NA	NA	reactome_Unwinding_of_DNA_Main_Pathway	NA	NA	NA	NA
NCI_Endogenous_TLR_signaling_Pathway_(regulation_of_cell_adhesion)	KEGG_ABC_transporters_Main_Pathway	reactome_Orc1_removal_from_chromatin_Main_Pathway	NA	NCI_Fanconi_anemia_Pathway_(regulation_of_double_strand_break_repair_via_homologous_recombination)	NA	NA	reactome_Phosphorylation_of_proteins_involved_in_G1_S_transition_by_active_Cyclin_E_Cdk2_complexes_Main_Pathway	NA	NA	NA	NA	NA	NA	NA
NCI_Fanconi_anemia_Main_Pathway	KEGG_Alanine_aspartate_and_glutamate_metabolism_Main_Pathway	reactome_p53_Dependent_G1_DNA_Damage_Response_Main_Pathway	NA	NCI_Fanconi_anemia_Pathway_(Sister_Chromatid_Exchange_Process)	NA	NA	reactome_Phosphorylation_of_proteins_involved_in_the_G2_M_transition_by_Cyclin_A_Cdc2_complexes_Main_Pathway	NA	NA	NA	NA	NA	NA	NA
NCI_Fanconi_anemia_Pathway_(DNA_repair)	KEGG_Aldosterone_regulated_sodium_reabsorption_Main_Pathway	reactome_Phosphate_bond_hydrolysis_by_NUDT_proteins_Main_Pathway	NA	NCI_FOXM1_transcription_factor_network_Main_Pathway	NA	NA	reactome_Polymerase_switching_Main_Pathway	NA	NA	NA	NA	NA	NA	NA
NCI_Fanconi_anemia_Pathway_(G1_S_transition_checkpoint)	KEGG_Amphetamine_addiction_Main_Pathway	reactome_Phosphorylation_of_Emi1_Main_Pathway	NA	NCI_Glypican_2_network_Main_Pathway	NA	NA	reactome_Polymerase_switching_on_the_C_strand_of_the_telomere_Main_Pathway	NA	NA	NA	NA	NA	NA	NA
NCI_Fanconi_anemia_Pathway_(regulation_of_double_strand_break_repair_via_homologous_recombination)	KEGG_Apoptosis_Main_Pathway	reactome_Phosphorylation_of_proteins_involved_in_G1_S_transition_by_active_Cyclin_E_Cdk2_complexes_Main_Pathway	NA	NCI_Integrin_linked_kinase_signaling_Pathway_(centrosome_localization)	NA	NA	reactome_Presynaptic_phase_of_homologous_DNA_pairing_and_strand_exchange_Main_Pathway	NA	NA	NA	NA	NA	NA	NA
NCI_Fanconi_anemia_Pathway_(Sister_Chromatid_Exchange_Process)	KEGG_Ascorbate_and_aldarate_metabolism_Main_Pathway	reactome_Phosphorylation_of_proteins_involved_in_the_G2_M_transition_by_Cyclin_A_Cdc2_complexes_Main_Pathway	NA	NCI_PDGF_receptor_signaling_network_Main_Pathway	NA	NA	reactome_Processive_synthesis_on_the_lagging_strand_Main_Pathway	NA	NA	NA	NA	NA	NA	NA
NCI_FGF_signaling_Pathway_(MAPKKK_cascade)	KEGG_Axon_guidance_Main_Pathway	reactome_Polymerase_switching_Main_Pathway	NA	NCI_PDGF_receptor_signaling_network_Pathway_(platelet_derived_growth_factor_receptor_signaling_pathway)	NA	NA	reactome_Recruitment_of_repair_and_signaling_proteins_to_double_strand_breaks_Main_Pathway	NA	NA	NA	NA	NA	NA	NA
NCI_FOXM1_transcription_factor_network_Main_Pathway	KEGG_Basal_cell_carcinoma_Main_Pathway	reactome_Polymerase_switching_on_the_C_strand_of_the_telomere_Main_Pathway	NA	NCI_PLK1_signaling_events_Main_Pathway	NA	NA	reactome_Removal_of_DNA_patch_containing_abasic_residue_Main_Pathway	NA	NA	NA	NA	NA	NA	NA
NCI_Glypican_2_network_Main_Pathway	KEGG_Basal_transcription_factors_Main_Pathway	reactome_Presynaptic_phase_of_homologous_DNA_pairing_and_strand_exchange_Main_Pathway	NA	NCI_PLK1_signaling_events_Pathway_(chromosome_segregation)	NA	NA	reactome_Removal_of_the_Flap_Intermediate_Main_Pathway	NA	NA	NA	NA	NA	NA	NA
NCI_Integrin_linked_kinase_signaling_Pathway_(centrosome_localization)	KEGG_Base_excision_repair_Main_Pathway	reactome_Processive_synthesis_on_the_lagging_strand_Main_Pathway	NA	NCI_PLK1_signaling_events_Pathway_(G2_M_transition_of_mitotic_cell_cycle)	NA	NA	reactome_Repair_synthesis_for_gap_filling_by_DNA_polymerase_in_TC_NER_Main_Pathway	NA	NA	NA	NA	NA	NA	NA
NCI_PDGF_receptor_signaling_network_Main_Pathway	KEGG_beta_Alanine_metabolism_Main_Pathway	reactome_Recruitment_of_repair_and_signaling_proteins_to_double_strand_breaks_Main_Pathway	NA	NCI_PLK1_signaling_events_Pathway_(Golgi_organization)	NA	NA	reactome_Repair_synthesis_of_patch_27_30_bases_long_by_DNA_polymerase_Main_Pathway	NA	NA	NA	NA	NA	NA	NA
NCI_PDGF_receptor_signaling_network_Pathway_(platelet_derived_growth_factor_receptor_signaling_pathway)	KEGG_Bile_secretion_Main_Pathway	reactome_Removal_of_DNA_patch_containing_abasic_residue_Main_Pathway	NA	NCI_PLK1_signaling_events_Pathway_(metaphase_plate_congression)	NA	NA	reactome_Switching_of_origins_to_a_post_replicative_state_Main_Pathway	NA	NA	NA	NA	NA	NA	NA
NCI_PLK1_signaling_events_Main_Pathway	KEGG_Biosynthesis_of_unsaturated_fatty_acids_Main_Pathway	reactome_Removal_of_the_Flap_Intermediate_Main_Pathway	NA	NCI_PLK1_signaling_events_Pathway_(microtubule_cytoskeleton_organization)	NA	NA	reactome_Telomere_C_strand_synthesis_initiation_Main_Pathway	NA	NA	NA	NA	NA	NA	NA
NCI_PLK1_signaling_events_Pathway_(chromosome_segregation)	KEGG_Calcium_signaling_Main_Pathway	reactome_Repair_synthesis_for_gap_filling_by_DNA_polymerase_in_TC_NER_Main_Pathway	NA	NCI_PLK1_signaling_events_Pathway_(positive_regulation_of_microtubule_depolymerization)	NA	NA	reactome_Unwinding_of_DNA_Main_Pathway	NA	NA	NA	NA	NA	NA	NA
NCI_PLK1_signaling_events_Pathway_(G2_M_transition_of_mitotic_cell_cycle)	KEGG_cAMP_signaling_Main_Pathway	reactome_Repair_synthesis_of_patch_27_30_bases_long_by_DNA_polymerase_Main_Pathway	NA	NCI_PLK1_signaling_events_Pathway_(proteasomal_ubiquitin_dependent_protein_catabolic_process)	NA	NA	NA	NA	NA	NA	NA	NA	NA	NA
NCI_PLK1_signaling_events_Pathway_(Golgi_organization)	KEGG_Cardiac_muscle_contraction_Main_Pathway	reactome_Switching_of_origins_to_a_post_replicative_state_Main_Pathway	NA	NCI_PLK1_signaling_events_Pathway_(regulation_of_attachment_of_spindle_microtubules_to_kinetochore)	NA	NA	NA	NA	NA	NA	NA	NA	NA	NA
NCI_PLK1_signaling_events_Pathway_(metaphase_plate_congression)	KEGG_Chagas_disease_American_trypanosomiasis__Main_Pathway	reactome_Telomere_C_strand_synthesis_initiation_Main_Pathway	NA	NCI_PLK1_signaling_events_Pathway_(regulation_of_centriole_centriole_cohesion)	NA	NA	NA	NA	NA	NA	NA	NA	NA	NA
NCI_PLK1_signaling_events_Pathway_(microtubule_cytoskeleton_organization)	KEGG_Chemical_carcinogenesis_Main_Pathway	reactome_Unwinding_of_DNA_Main_Pathway	NA	NCI_PLK1_signaling_events_Pathway_(regulation_of_mitotic_centrosome_separation)	NA	NA	NA	NA	NA	NA	NA	NA	NA	NA
NCI_PLK1_signaling_events_Pathway_(positive_regulation_of_microtubule_depolymerization)	KEGG_Choline_metabolism_in_cancer_Main_Pathway	NA	NA	NCI_PLK1_signaling_events_Pathway_(spindle_assembly)	NA	NA	NA	NA	NA	NA	NA	NA	NA	NA
NCI_PLK1_signaling_events_Pathway_(proteasomal_ubiquitin_dependent_protein_catabolic_process)	KEGG_Cyanoamino_acid_metabolism_Main_Pathway	NA	NA	NCI_PLK1_signaling_events_Pathway_(spindle_elongation)	NA	NA	NA	NA	NA	NA	NA	NA	NA	NA
NCI_PLK1_signaling_events_Pathway_(regulation_of_attachment_of_spindle_microtubules_to_kinetochore)	KEGG_Cysteine_and_methionine_metabolism_Main_Pathway	NA	NA	NCI_PLK1_signaling_events_Pathway_(spindle_stabilization)	NA	NA	NA	NA	NA	NA	NA	NA	NA	NA
NCI_PLK1_signaling_events_Pathway_(regulation_of_centriole_centriole_cohesion)	KEGG_Dilated_cardiomyopathy_Main_Pathway	NA	NA	NCI_PLK2_and_PLK4_events_Main_Pathway	NA	NA	NA	NA	NA	NA	NA	NA	NA	NA
NCI_PLK1_signaling_events_Pathway_(regulation_of_mitotic_centrosome_separation)	KEGG_DNA_replication_Main_Pathway	NA	NA	NCI_PLK2_and_PLK4_events_Pathway_(regulation_of_centriole_replication)	NA	NA	NA	NA	NA	NA	NA	NA	NA	NA
NCI_PLK1_signaling_events_Pathway_(spindle_assembly)	KEGG_Drug_metabolism_other_enzymes_Main_Pathway	NA	NA	NCI_RAC1_signaling_Pathway_(neuron_projection_development)	NA	NA	NA	NA	NA	NA	NA	NA	NA	NA
NCI_PLK1_signaling_events_Pathway_(spindle_elongation)	KEGG_Ether_lipid_metabolism_Main_Pathway	NA	NA	NCI_Reelin_signaling_Main_Pathway	NA	NA	NA	NA	NA	NA	NA	NA	NA	NA
NCI_PLK1_signaling_events_Pathway_(spindle_stabilization)	KEGG_Fanconi_anemia_Main_Pathway	NA	NA	NCI_Reelin_signaling_Pathway_(long_term_memory)	NA	NA	NA	NA	NA	NA	NA	NA	NA	NA
NCI_PLK2_and_PLK4_events_Main_Pathway	KEGG_Fatty_acid_biosynthesis_Main_Pathway	NA	NA	NCI_Reelin_signaling_Pathway_(neuron_migration)	NA	NA	NA	NA	NA	NA	NA	NA	NA	NA
NCI_PLK2_and_PLK4_events_Pathway_(regulation_of_centriole_replication)	KEGG_Fatty_acid_degradation_Main_Pathway	NA	NA	NCI_Regulation_of_Androgen_receptor_activity_Pathway_(Pathway_positive_regulation_of_transcription_via_GATA2)	NA	NA	NA	NA	NA	NA	NA	NA	NA	NA
NCI_RAC1_signaling_Pathway_(neuron_projection_development)	KEGG_Focal_adhesion_Main_Pathway	NA	NA	NCI_Regulation_of_retinoblastoma_protein_Main_Pathway	NA	NA	NA	NA	NA	NA	NA	NA	NA	NA
NCI_Reelin_signaling_Main_Pathway	KEGG_Fructose_and_mannose_metabolism_Main_Pathway	NA	NA	NCI_Regulation_of_retinoblastoma_protein_Pathway_(histone_methylation)	NA	NA	NA	NA	NA	NA	NA	NA	NA	NA
NCI_Reelin_signaling_Pathway_(long_term_memory)	KEGG_Galactose_metabolism_Main_Pathway	NA	NA	NCI_RhoA_signaling_Pathway_(Golgi_organization)	NA	NA	NA	NA	NA	NA	NA	NA	NA	NA
NCI_Reelin_signaling_Pathway_(neuron_migration)	KEGG_Gastric_acid_secretion_Main_Pathway	NA	NA	NCI_Signaling_events_mediated_by_HDAC_Class_I_Main_Pathway	NA	NA	NA	NA	NA	NA	NA	NA	NA	NA
NCI_Regulation_of_Androgen_receptor_activity_Pathway_(Pathway_positive_regulation_of_transcription_via_GATA2)	KEGG_Glycerolipid_metabolism_Main_Pathway	NA	NA	NCI_Signaling_events_mediated_by_HDAC_Class_I_Pathway_(histone_deacetylation)	NA	NA	NA	NA	NA	NA	NA	NA	NA	NA
NCI_Regulation_of_retinoblastoma_protein_Main_Pathway	KEGG_Glycerophospholipid_metabolism_Main_Pathway	NA	NA	NCI_Signaling_events_mediated_by_the_Hedgehog_family_Pathway_(determination_of_left_right_symmetry)	NA	NA	NA	NA	NA	NA	NA	NA	NA	NA
NCI_Regulation_of_retinoblastoma_protein_Pathway_(histone_methylation)	KEGG_Glycine_serine_and_threonine_metabolism_Main_Pathway	NA	NA	NCI_Signaling_events_mediated_by_the_Hedgehog_family_Pathway_(heart_development)	NA	NA	NA	NA	NA	NA	NA	NA	NA	NA
NCI_RhoA_signaling_Pathway_(Golgi_organization)	KEGG_Glycosphingolipid_biosynthesis_globo_series_Main_Pathway	NA	NA	NCI_Signaling_events_mediated_by_the_Hedgehog_family_Pathway_(heart_looping)	NA	NA	NA	NA	NA	NA	NA	NA	NA	NA
NCI_Signaling_events_mediated_by_HDAC_Class_I_Main_Pathway	KEGG_Glycosphingolipid_biosynthesis_lacto_and_neolacto_series_Main_Pathway	NA	NA	NCI_Signaling_events_mediated_by_the_Hedgehog_family_Pathway_(somite_specification)	NA	NA	NA	NA	NA	NA	NA	NA	NA	NA
NCI_Signaling_events_mediated_by_HDAC_Class_I_Pathway_(histone_deacetylation)	KEGG_Hedgehog_signaling_Main_Pathway	NA	NA	NCI_Signaling_events_mediated_by_VEGFR1_and_VEGFR2_Pathway_(Pathway_degradation_of_AKAP1)	NA	NA	NA	NA	NA	NA	NA	NA	NA	NA
NCI_Signaling_events_mediated_by_the_Hedgehog_family_Pathway_(determination_of_left_right_symmetry)	KEGG_Homologous_recombination_Main_Pathway	NA	NA	NCI_Signaling_mediated_by_p38_gamma_and_p38_delta_Pathway_(G2_M_transition_checkpoint)	NA	NA	NA	NA	NA	NA	NA	NA	NA	NA
NCI_Signaling_events_mediated_by_the_Hedgehog_family_Pathway_(heart_development)	KEGG_HTLV_I_infection_Main_Pathway	NA	NA	NCI_Syndecan_4_mediated_signaling_events_Main_Pathway	NA	NA	NA	NA	NA	NA	NA	NA	NA	NA
NCI_Signaling_events_mediated_by_the_Hedgehog_family_Pathway_(heart_looping)	KEGG_Hypertrophic_cardiomyopathy_HCM__Main_Pathway	NA	NA	NCI_Trk_receptor_signaling_mediated_by_PI3K_and_PLC_gamma_Pathway_(regulation_of_long_term_neuronal_synaptic_plasticity)	NA	NA	NA	NA	NA	NA	NA	NA	NA	NA
NCI_Signaling_events_mediated_by_the_Hedgehog_family_Pathway_(somite_specification)	KEGG_Leukocyte_transendothelial_migration_Main_Pathway	NA	NA	PTEN_Pathway_DNA_Repair	NA	NA	NA	NA	NA	NA	NA	NA	NA	NA
NCI_Signaling_events_mediated_by_VEGFR1_and_VEGFR2_Pathway_(Pathway_degradation_of_AKAP1)	KEGG_Lipoic_acid_metabolism_Main_Pathway	NA	NA	Ras_Pathway_Receptor_Endocytosis	NA	NA	NA	NA	NA	NA	NA	NA	NA	NA
NCI_Signaling_mediated_by_p38_gamma_and_p38_delta_Pathway_(G2_M_transition_checkpoint)	KEGG_Lysine_biosynthesis_Main_Pathway	NA	NA	reactome_Abnormal_metabolism_in_phenylketonuria_Main_Pathway	NA	NA	NA	NA	NA	NA	NA	NA	NA	NA
NCI_Syndecan_4_mediated_signaling_events_Main_Pathway	KEGG_Melanoma_Main_Pathway	NA	NA	reactome_Activation_of_ATR_in_response_to_replication_stress_Main_Pathway	NA	NA	NA	NA	NA	NA	NA	NA	NA	NA
NCI_Trk_receptor_signaling_mediated_by_PI3K_and_PLC_gamma_Pathway_(regulation_of_long_term_neuronal_synaptic_plasticity)	KEGG_Metabolism_of_xenobiotics_by_cytochrome_P450_Main_Pathway	NA	NA	reactome_Activation_of_DNA_fragmentation_factor_Main_Pathway	NA	NA	NA	NA	NA	NA	NA	NA	NA	NA
PTEN_Pathway_DNA_Repair	KEGG_Mismatch_repair_Main_Pathway	NA	NA	reactome_Activation_of_NIMA_Kinases_NEK9_NEK6_NEK7_Main_Pathway	NA	NA	NA	NA	NA	NA	NA	NA	NA	NA
Ras_Pathway_Receptor_Endocytosis	KEGG_mRNA_surveillance_Main_Pathway	NA	NA	reactome_Activation_of_NOXA_and_translocation_to_mitochondria_Main_Pathway	NA	NA	NA	NA	NA	NA	NA	NA	NA	NA
reactome_Abnormal_metabolism_in_phenylketonuria_Main_Pathway	KEGG_Mucin_type_O_Glycan_biosynthesis_Main_Pathway	NA	NA	reactome_Activation_of_PUMA_and_translocation_to_mitochondria_Main_Pathway	NA	NA	NA	NA	NA	NA	NA	NA	NA	NA
reactome_Activation_of_ATR_in_response_to_replication_stress_Main_Pathway	KEGG_Nitrogen_metabolism_Main_Pathway	NA	NA	reactome_Activation_of_the_pre_replicative_complex_Main_Pathway	NA	NA	NA	NA	NA	NA	NA	NA	NA	NA
reactome_Activation_of_DNA_fragmentation_factor_Main_Pathway	KEGG_Non_homologous_end_joining_Main_Pathway	NA	NA	reactome_Amyloids_Main_Pathway	NA	NA	NA	NA	NA	NA	NA	NA	NA	NA
reactome_Activation_of_NIMA_Kinases_NEK9_NEK6_NEK7_Main_Pathway	KEGG_Nucleotide_excision_repair_Main_Pathway	NA	NA	reactome_APC_C_Cdc20_mediated_degradation_of_Cyclin_B_Main_Pathway	NA	NA	NA	NA	NA	NA	NA	NA	NA	NA
reactome_Activation_of_NOXA_and_translocation_to_mitochondria_Main_Pathway	KEGG_One_carbon_pool_by_folate_Main_Pathway	NA	NA	reactome_APC_C_Cdc20_mediated_degradation_of_mitotic_proteins_Main_Pathway	NA	NA	NA	NA	NA	NA	NA	NA	NA	NA
reactome_Activation_of_PUMA_and_translocation_to_mitochondria_Main_Pathway	KEGG_Oocyte_meiosis_Main_Pathway	NA	NA	reactome_APC_Cdc20_mediated_degradation_of_Nek2A_Main_Pathway	NA	NA	NA	NA	NA	NA	NA	NA	NA	NA
reactome_Activation_of_the_pre_replicative_complex_Main_Pathway	KEGG_Osteoclast_differentiation_Main_Pathway	NA	NA	reactome_Apoptotic_cleavage_of_cellular_proteins_Main_Pathway	NA	NA	NA	NA	NA	NA	NA	NA	NA	NA
reactome_Amyloids_Main_Pathway	KEGG_Pantothenate_and_CoA_biosynthesis_Main_Pathway	NA	NA	reactome_Assembly_of_the_RAD51_ssDNA_nucleoprotein_complex_Main_Pathway	NA	NA	NA	NA	NA	NA	NA	NA	NA	NA
reactome_APC_C_Cdc20_mediated_degradation_of_Cyclin_B_Main_Pathway	KEGG_Pentose_and_glucuronate_interconversions_Main_Pathway	NA	NA	reactome_Astrocytic_Glutamate_Glutamine_Uptake_And_Metabolism_Main_Pathway	NA	NA	NA	NA	NA	NA	NA	NA	NA	NA
reactome_APC_C_Cdc20_mediated_degradation_of_mitotic_proteins_Main_Pathway	KEGG_Pentose_phosphate_Main_Pathway	NA	NA	reactome_ATM_mediated_phosphorylation_of_repair_proteins_Main_Pathway	NA	NA	NA	NA	NA	NA	NA	NA	NA	NA
reactome_APC_Cdc20_mediated_degradation_of_Nek2A_Main_Pathway	KEGG_Phenylalanine_metabolism_Main_Pathway	NA	NA	reactome_Autointegration_results_in_viral_DNA_circles_Main_Pathway	NA	NA	NA	NA	NA	NA	NA	NA	NA	NA
reactome_Apoptotic_cleavage_of_cellular_proteins_Main_Pathway	KEGG_Porphyrin_and_chlorophyll_metabolism_Main_Pathway	NA	NA	reactome_Beta_oxidation_of_butanoyl_CoA_to_acetyl_CoA_Main_Pathway	NA	NA	NA	NA	NA	NA	NA	NA	NA	NA
reactome_Assembly_of_the_RAD51_ssDNA_nucleoprotein_complex_Main_Pathway	KEGG_Progesterone_mediated_oocyte_maturation_Main_Pathway	NA	NA	reactome_CaMK_IV_mediated_phosphorylation_of_CREB_Main_Pathway	NA	NA	NA	NA	NA	NA	NA	NA	NA	NA
reactome_Astrocytic_Glutamate_Glutamine_Uptake_And_Metabolism_Main_Pathway	KEGG_Prostate_cancer_Main_Pathway	NA	NA	reactome_Carnitine_synthesis_Main_Pathway	NA	NA	NA	NA	NA	NA	NA	NA	NA	NA
reactome_ATM_mediated_phosphorylation_of_repair_proteins_Main_Pathway	KEGG_Purine_metabolism_Main_Pathway	NA	NA	reactome_CDC6_association_with_the_ORC_origin_complex_Main_Pathway	NA	NA	NA	NA	NA	NA	NA	NA	NA	NA
reactome_Autointegration_results_in_viral_DNA_circles_Main_Pathway	KEGG_Pyrimidine_metabolism_Main_Pathway	NA	NA	reactome_cell_division_Main_Pathway	NA	NA	NA	NA	NA	NA	NA	NA	NA	NA
reactome_Beta_oxidation_of_butanoyl_CoA_to_acetyl_CoA_Main_Pathway	KEGG_Ribosome_biogenesis_in_eukaryotes_Main_Pathway	NA	NA	reactome_Chk1_Chk2_Cds1_mediated_inactivation_of_Cyclin_B_Cdk1_complex_Main_Pathway	NA	NA	NA	NA	NA	NA	NA	NA	NA	NA
reactome_CaMK_IV_mediated_phosphorylation_of_CREB_Main_Pathway	KEGG_Ribosome_Main_Pathway	NA	NA	reactome_Cohesin_Loading_onto_Chromatin_Main_Pathway	NA	NA	NA	NA	NA	NA	NA	NA	NA	NA
reactome_Carnitine_synthesis_Main_Pathway	KEGG_RNA_degradation_Main_Pathway	NA	NA	reactome_Condensation_of_Prometaphase_Chromosomes_Main_Pathway	NA	NA	NA	NA	NA	NA	NA	NA	NA	NA
reactome_CDC6_association_with_the_ORC_origin_complex_Main_Pathway	KEGG_RNA_polymerase_Main_Pathway	NA	NA	reactome_Condensation_of_Prophase_Chromosomes_Main_Pathway	NA	NA	NA	NA	NA	NA	NA	NA	NA	NA
reactome_cell_division_Main_Pathway	KEGG_RNA_transport_Main_Pathway	NA	NA	reactome_CREB_phosphorylation_through_the_activation_of_CaMKK_Main_Pathway	NA	NA	NA	NA	NA	NA	NA	NA	NA	NA
reactome_Chk1_Chk2_Cds1_mediated_inactivation_of_Cyclin_B_Cdk1_complex_Main_Pathway	KEGG_Selenocompound_metabolism_Main_Pathway	NA	NA	reactome_CRMPs_in_Sema3A_signaling_Main_Pathway	NA	NA	NA	NA	NA	NA	NA	NA	NA	NA
reactome_Cohesin_Loading_onto_Chromatin_Main_Pathway	KEGG_Spliceosome_Main_Pathway	NA	NA	reactome_Cyclin_A_B1_associated_events_during_G2_M_transition_Main_Pathway	NA	NA	NA	NA	NA	NA	NA	NA	NA	NA
reactome_Condensation_of_Prometaphase_Chromosomes_Main_Pathway	KEGG_TGF_beta_signaling_Main_Pathway	NA	NA	reactome_Cyclin_A_Cdk2_associated_events_at_S_phase_entry_Main_Pathway	NA	NA	NA	NA	NA	NA	NA	NA	NA	NA
reactome_Condensation_of_Prophase_Chromosomes_Main_Pathway	KEGG_Transcriptional_misregulation_in_cancer_Main_Pathway	NA	NA	reactome_Cyclin_B2_mediated_events_Main_Pathway	NA	NA	NA	NA	NA	NA	NA	NA	NA	NA
reactome_CREB_phosphorylation_through_the_activation_of_CaMKK_Main_Pathway	KEGG_Tryptophan_metabolism_Main_Pathway	NA	NA	reactome_Deposition_of_new_CENPA_containing_nucleosomes_at_the_centromere_Main_Pathway	NA	NA	NA	NA	NA	NA	NA	NA	NA	NA
reactome_CRMPs_in_Sema3A_signaling_Main_Pathway	KEGG_Tuberculosis_Main_Pathway	NA	NA	reactome_DNA_Damage_Telomere_Stress_Induced_Senescence_Main_Pathway	NA	NA	NA	NA	NA	NA	NA	NA	NA	NA
reactome_Cyclin_A_B1_associated_events_during_G2_M_transition_Main_Pathway	KEGG_Ubiquinone_and_other_terpenoid_quinone_biosynthesis_Main_Pathway	NA	NA	reactome_DNA_replication_initiation_Main_Pathway	NA	NA	NA	NA	NA	NA	NA	NA	NA	NA
reactome_Cyclin_A_Cdk2_associated_events_at_S_phase_entry_Main_Pathway	KEGG_Ubiquitin_mediated_proteolysis_Main_Pathway	NA	NA	reactome_E2F_enabled_inhibition_of_pre_replication_complex_formation_Main_Pathway	NA	NA	NA	NA	NA	NA	NA	NA	NA	NA
reactome_Cyclin_B2_mediated_events_Main_Pathway	KEGG_Vasopressin_regulated_water_reabsorption_Main_Pathway	NA	NA	reactome_E2F_mediated_regulation_of_DNA_replication_Main_Pathway	NA	NA	NA	NA	NA	NA	NA	NA	NA	NA
reactome_Deposition_of_new_CENPA_containing_nucleosomes_at_the_centromere_Main_Pathway	KEGG_Viral_carcinogenesis_Main_Pathway	NA	NA	reactome_Early_Phase_of_HIV_Life_Cycle_Main_Pathway	NA	NA	NA	NA	NA	NA	NA	NA	NA	NA
reactome_DNA_Damage_Telomere_Stress_Induced_Senescence_Main_Pathway	KEGG_Vitamin_digestion_and_absorption_Main_Pathway	NA	NA	reactome_ERK1_activation_Main_Pathway	NA	NA	NA	NA	NA	NA	NA	NA	NA	NA
reactome_DNA_replication_initiation_Main_Pathway	MAPK_Family_Pathway_Chromatin_Remodelling	NA	NA	reactome_Establishment_of_Sister_Chromatid_Cohesion_Main_Pathway	NA	NA	NA	NA	NA	NA	NA	NA	NA	NA
reactome_E2F_enabled_inhibition_of_pre_replication_complex_formation_Main_Pathway	MAPK_Signaling_Pathway_Cell_Survival	NA	NA	reactome_Eukaryotic_Translation_Elongation_Main_Pathway	NA	NA	NA	NA	NA	NA	NA	NA	NA	NA
reactome_E2F_mediated_regulation_of_DNA_replication_Main_Pathway	Mismatch_Repair_in_Eukaryotes_Pathway	NA	NA	reactome_Fanconi_Anemia_Main_Pathway	NA	NA	NA	NA	NA	NA	NA	NA	NA	NA
reactome_Early_Phase_of_HIV_Life_Cycle_Main_Pathway	mTOR_Pathway_Cap-dependent_Translation	NA	NA	reactome_Fatty_Acyl_CoA_Biosynthesis_Main_Pathway	NA	NA	NA	NA	NA	NA	NA	NA	NA	NA
reactome_ERK1_activation_Main_Pathway	mTOR_Pathway_mRNA_Biogenesis	NA	NA	reactome_Formation_of_Senescence_Associated_Heterochromatin_Foci_SAHF__Main_Pathway	NA	NA	NA	NA	NA	NA	NA	NA	NA	NA
[truncated: 592 more rows]

## Sheet: GSE59861_24h_GSE55118
X1_sets_GSE55118_middle_vs_young	X1_sets_GSE55118_old_vs_young	X1_sets_GSE59861_24h_2Gy	X1_sets_GSE59861_24h_5cGy	X2_sets_GSE55118_middle_vs_young_GSE55118_old_vs_young	X2_sets_GSE55118_middle_vs_young_GSE59861_24h_2Gy	X2_sets_GSE55118_middle_vs_young_GSE59861_24h_5cGy	X2_sets_GSE55118_old_vs_young_GSE59861_24h_2Gy	X2_sets_GSE55118_old_vs_young_GSE59861_24h_5cGy	X2_sets_GSE59861_24h_2Gy_GSE59861_24h_5cGy	X3_sets_GSE55118_middle_vs_young_GSE55118_old_vs_young_GSE59861_24h_2Gy	X3_sets_GSE55118_middle_vs_young_GSE55118_old_vs_young_GSE59861_24h_5cGy	X3_sets_GSE55118_middle_vs_young_GSE59861_24h_2Gy_GSE59861_24h_5cGy	X3_sets_GSE55118_old_vs_young_GSE59861_24h_2Gy_GSE59861_24h_5cGy	X4_sets_GSE55118_middle_vs_young_GSE55118_old_vs_young_GSE59861_24h_2Gy_GSE59861_24h_5cGy
[truncated: 88 more rows]
