# Supplementary material for: Replicative and radiation-induced aging: a comparison of gene expression profiles
Source: Aging (Albany NY). 2019 Apr 19;11(8):2378–87. doi: 10.18632/aging.101921 (PMC6520014; doi:10.18632/aging.101921)
Supplement: Supplemental Table S4 [file aging-11-101921-s004.xlsx]

## Sheet: GSE59861_3h_EMTAB2086
X1_sets_EMTAB2086_70_vs_30	X1_sets_EMTAB2086_80_vs_30	X1_sets_GSE59861_3h_2Gy	X1_sets_GSE59861_3h_5cGy	X2_sets_EMTAB2086_70_vs_30_EMTAB2086_80_vs_30	X2_sets_EMTAB2086_70_vs_30_GSE59861_3h_2Gy	X2_sets_EMTAB2086_70_vs_30_GSE59861_3h_5cGy	X2_sets_EMTAB2086_80_vs_30_GSE59861_3h_2Gy	X2_sets_EMTAB2086_80_vs_30_GSE59861_3h_5cGy	X2_sets_GSE59861_3h_2Gy_GSE59861_3h_5cGy	X3_sets_EMTAB2086_70_vs_30_EMTAB2086_80_vs_30_GSE59861_3h_2Gy	X3_sets_EMTAB2086_70_vs_30_EMTAB2086_80_vs_30_GSE59861_3h_5cGy	X3_sets_EMTAB2086_70_vs_30_GSE59861_3h_2Gy_GSE59861_3h_5cGy	X3_sets_EMTAB2086_80_vs_30_GSE59861_3h_2Gy_GSE59861_3h_5cGy	X4_sets_EMTAB2086_70_vs_30_EMTAB2086_80_vs_30_GSE59861_3h_2Gy_GSE59861_3h_5cGy
AAAS	AAAS	ABCC4	ACE	AAAS	AGPAT5	NA	ABI3BP	C5ORF34	GIT2	AGPAT5	NA	NA	NA	NA
ACD	AADAT	ABCE1	ATPAF2	ACD	BCLAF1	NA	ACAD9	CEP152	HSDL1	BCLAF1	NA	NA	NA	NA
ACTC1	AASDH	ABI1	BBS12	ACTC1	CDKN1B	NA	AGPAT5	HIST1H2BD	SBNO1	CDKN1B	NA	NA	NA	NA
ACTR5	AASDHPPT	ABI3BP	BRCC3	ACTR5	CNOT6	NA	AP4B1	POLR2C	NA	CNOT6	NA	NA	NA	NA
ADAMTS3	AASS	ACAD9	C15ORF32	ADAMTS3	EEF1A1	NA	ARL6IP1	ZNF711	NA	EEF1A1	NA	NA	NA	NA
ADARB1	AATF	ACSL1	C5ORF34	ADARB1	GIN1	NA	ATF1	NA	NA	GIN1	NA	NA	NA	NA
ADCY3	ABCB7	ACTB	CCDC22	ADCY3	HDAC1	NA	BCLAF1	NA	NA	HDAC1	NA	NA	NA	NA
ADPRH	ABCC9	ACTR2	CEP152	AGK	HSPD1	NA	CASP7	NA	NA	HSPD1	NA	NA	NA	NA
AGK	ABCF2	ACTR3	DIRAS2	AGPAT5	MAT2B	NA	CCDC117	NA	NA	MAT2B	NA	NA	NA	NA
AGPAT5	ABCG2	ACVR1	DOCK9	AKAP1	MBOAT2	NA	CCT2	NA	NA	MIS12	NA	NA	NA	NA
AKAP1	ABHD10	ADAM10	ERGIC1	AKR1E2	MIS12	NA	CDC5L	NA	NA	MRPS27	NA	NA	NA	NA
AKR1E2	ABHD2	ADAM9	GIT2	ALDH1A3	MRPS27	NA	CDKN1B	NA	NA	MSH6	NA	NA	NA	NA
ALDH1A3	ABHD3	ADSS	HIST1H2BD	ALMS1	MSH6	NA	CKAP2	NA	NA	PRKDC	NA	NA	NA	NA
ALDH3A2	ABI2	AGPAT5	HSD3B7	AMOT	PRKDC	NA	CKAP5	NA	NA	PRMT3	NA	NA	NA	NA
ALG9	ABI3	AGTR1	HSDL1	ANGEL2	PRMT3	NA	CNBP	NA	NA	PRPS2	NA	NA	NA	NA
ALMS1	ABI3BP	AK3	IL1RL2	ANKRD28	PRPS2	NA	CNOT6	NA	NA	RRM1	NA	NA	NA	NA
AMOT	ABT1	ALCAM	KIF21B	ANP32A	RRM1	NA	DEK	NA	NA	SIN3A	NA	NA	NA	NA
ANGEL2	ACACA	ANKRD13C	LPAR4	ANP32B	SIN3A	NA	DOCK11	NA	NA	SRSF1	NA	NA	NA	NA
ANKRD28	ACAD10	AP3M1	MCF2L	AP1G2	SRSF1	NA	DROSHA	NA	NA	STIL	NA	NA	NA	NA
ANP32A	ACAD9	AP4B1	NF1	APCDD1L	STIL	NA	EEF1A1	NA	NA	TMPO	NA	NA	NA	NA
ANP32B	ACADM	APBB2	NLRP3	APEX1	TMPO	NA	EIF4B	NA	NA	TXNRD1	NA	NA	NA	NA
AP1G2	ACAT1	APP	NMUR1	APEX2	TXNRD1	NA	ELOVL5	NA	NA	UBA2	NA	NA	NA	NA
APCDD1L	ACAT2	ARFGAP3	OR5P3	APOLD1	UBA2	NA	EPS8	NA	NA	NA	NA	NA	NA	NA
APEX1	ACBD6	ARHGAP18	PADI2	AQR	NA	NA	ETAA1	NA	NA	NA	NA	NA	NA	NA
APEX2	ACD	ARHGEF12	PLEKHM2	ARHGAP32	NA	NA	G3BP1	NA	NA	NA	NA	NA	NA	NA
APOL4	ACIN1	ARL6IP1	PLIN1	ARHGAP42	NA	NA	GART	NA	NA	NA	NA	NA	NA	NA
APOLD1	ACSL3	ARL8B	POLR2C	ARHGEF26	NA	NA	GIN1	NA	NA	NA	NA	NA	NA	NA
AQR	ACTC1	ASCC1	PPY	ARID2	NA	NA	GLO1	NA	NA	NA	NA	NA	NA	NA
ARHGAP32	ACTL6A	ASPH	PROS1	ARID3B	NA	NA	GLOD4	NA	NA	NA	NA	NA	NA	NA
ARHGAP42	ACTR5	ATF1	RINL	ARL9	NA	NA	GNL3	NA	NA	NA	NA	NA	NA	NA
ARHGEF26	ADAL	ATF2	RNPC3	ARRB2	NA	NA	HDAC1	NA	NA	NA	NA	NA	NA	NA
ARID2	ADAMTS3	ATF6	SBNO1	ARSI	NA	NA	HNRNPA1	NA	NA	NA	NA	NA	NA	NA
ARID3B	ADAMTS6	ATP6V1A	SETD7	ASF1A	NA	NA	HSPD1	NA	NA	NA	NA	NA	NA	NA
ARL9	ADARB1	ATP6V1B2	SPATA8	ASF1B	NA	NA	HSPH1	NA	NA	NA	NA	NA	NA	NA
ARRB2	ADAT2	ATRX	THOC2	ATAD2	NA	NA	IFI16	NA	NA	NA	NA	NA	NA	NA
ARSI	ADCY3	B3GNT2	TSSK6	ATG4C	NA	NA	KIF2A	NA	NA	NA	NA	NA	NA	NA
ASF1A	ADNP	B4GALT4	ZDBF2	AURKB	NA	NA	LARS	NA	NA	NA	NA	NA	NA	NA
ASF1B	ADNP2	BCL10	ZNF711	AUTS2	NA	NA	LTV1	NA	NA	NA	NA	NA	NA	NA
ATAD2	ADSL	BCLAF1	ZNF782	AXL	NA	NA	MAT2B	NA	NA	NA	NA	NA	NA	NA
ATG4C	AFG3L2	BZW2	NA	B3GALNT1	NA	NA	METAP1	NA	NA	NA	NA	NA	NA	NA
AURKB	AGBL2	C1ORF174	NA	B3GALT1	NA	NA	MIS12	NA	NA	NA	NA	NA	NA	NA
AUTS2	AGK	C1ORF43	NA	B3GNT5	NA	NA	MRPS27	NA	NA	NA	NA	NA	NA	NA
AXL	AGPAT4	C5ORF15	NA	B4GALT5	NA	NA	MSH6	NA	NA	NA	NA	NA	NA	NA
B3GALNT1	AGPAT5	CAB39	NA	B4GALT6	NA	NA	NAP1L4	NA	NA	NA	NA	NA	NA	NA
B3GALT1	AHI1	CALCOCO2	NA	BCL2L11	NA	NA	NUCKS1	NA	NA	NA	NA	NA	NA	NA
B3GNT5	AKAP1	CALD1	NA	BCL3	NA	NA	NUP153	NA	NA	NA	NA	NA	NA	NA
B4GALT5	AKAP7	CALU	NA	BCL9	NA	NA	PARN	NA	NA	NA	NA	NA	NA	NA
B4GALT6	AKIRIN2	CANX	NA	BCLAF1	NA	NA	PITPNB	NA	NA	NA	NA	NA	NA	NA
BCL2L11	AKR1C1	CAP2	NA	BCS1L	NA	NA	PLRG1	NA	NA	NA	NA	NA	NA	NA
BCL3	AKR1E2	CAPN2	NA	BEND3	NA	NA	PNN	NA	NA	NA	NA	NA	NA	NA
BCL9	ALDH1A3	CAPZA1	NA	BIRC5	NA	NA	PPM1B	NA	NA	NA	NA	NA	NA	NA
BCLAF1	ALG14	CAPZA2	NA	BLM	NA	NA	PPT1	NA	NA	NA	NA	NA	NA	NA
BCS1L	ALG6	CASP7	NA	BNC1	NA	NA	PRKDC	NA	NA	NA	NA	NA	NA	NA
BEND3	ALKBH1	CAT	NA	BRD7	NA	NA	PRMT3	NA	NA	NA	NA	NA	NA	NA
BIRC5	ALKBH8	CCDC117	NA	BRIX1	NA	NA	PRPS2	NA	NA	NA	NA	NA	NA	NA
BLM	ALMS1	CCNG2	NA	BUB1	NA	NA	RFC1	NA	NA	NA	NA	NA	NA	NA
BNC1	ALPK1	CCT2	NA	BUD13	NA	NA	RRM1	NA	NA	NA	NA	NA	NA	NA
BRD7	AMD1	CD164	NA	C10ORF82	NA	NA	SCLT1	NA	NA	NA	NA	NA	NA	NA
BRIX1	AMMECR1	CD46	NA	C17ORF53	NA	NA	SECISBP2	NA	NA	NA	NA	NA	NA	NA
BUB1	AMOT	CDC14B	NA	C19ORF44	NA	NA	SETD2	NA	NA	NA	NA	NA	NA	NA
BUD13	AMPH	CDC16	NA	C19ORF48	NA	NA	SIN3A	NA	NA	NA	NA	NA	NA	NA
C10ORF82	ANAPC1	CDC27	NA	C1ORF112	NA	NA	SMAD4	NA	NA	NA	NA	NA	NA	NA
C17ORF53	ANGEL2	CDC5L	NA	C1ORF21	NA	NA	SMARCA2	NA	NA	NA	NA	NA	NA	NA
C19ORF44	ANKRD11	CDC73	NA	C1ORF220	NA	NA	SRSF1	NA	NA	NA	NA	NA	NA	NA
C19ORF48	ANKRD13A	CDH11	NA	C20ORF96	NA	NA	STIL	NA	NA	NA	NA	NA	NA	NA
C1ORF112	ANKRD28	CDKL3	NA	C3ORF14	NA	NA	STIP1	NA	NA	NA	NA	NA	NA	NA
C1ORF21	ANKRD50	CDKN1B	NA	C4ORF46	NA	NA	STXBP5	NA	NA	NA	NA	NA	NA	NA
C1ORF220	ANLN	CHSY1	NA	CABLES2	NA	NA	TCEA1	NA	NA	NA	NA	NA	NA	NA
C20ORF96	ANP32A	CKAP2	NA	CACHD1	NA	NA	TMPO	NA	NA	NA	NA	NA	NA	NA
C3ORF14	ANP32B	CKAP5	NA	CACYBP	NA	NA	TNC	NA	NA	NA	NA	NA	NA	NA
C4ORF46	ANP32E	CLASP2	NA	CAD	NA	NA	TOP2A	NA	NA	NA	NA	NA	NA	NA
CABLES2	AP1G2	CLPX	NA	CALML4	NA	NA	TXNRD1	NA	NA	NA	NA	NA	NA	NA
CACHD1	AP4B1	CLTC	NA	CAMK1G	NA	NA	UBA2	NA	NA	NA	NA	NA	NA	NA
CACYBP	AP4S1	CNBP	NA	CAMK4	NA	NA	UBXN2A	NA	NA	NA	NA	NA	NA	NA
CAD	APCDD1L	CNOT6	NA	CASP2	NA	NA	UGDH	NA	NA	NA	NA	NA	NA	NA
CALML4	APEX1	CNOT8	NA	CBX5	NA	NA	WTAP	NA	NA	NA	NA	NA	NA	NA
CAMK1G	APEX2	COG5	NA	CCDC134	NA	NA	XPO1	NA	NA	NA	NA	NA	NA	NA
CAMK4	APH1A	COQ10B	NA	CCDC138	NA	NA	NA	NA	NA	NA	NA	NA	NA	NA
CARHSP1	API5	CORIN	NA	CCDC34	NA	NA	NA	NA	NA	NA	NA	NA	NA	NA
CASP2	APOBEC3F	CPOX	NA	CCDC58	NA	NA	NA	NA	NA	NA	NA	NA	NA	NA
CBX5	APOLD1	CRK	NA	CCDC77	NA	NA	NA	NA	NA	NA	NA	NA	NA	NA
CCDC134	APOO	CTNNB1	NA	CCDC86	NA	NA	NA	NA	NA	NA	NA	NA	NA	NA
CCDC138	AQR	CYB5B	NA	CCDC89	NA	NA	NA	NA	NA	NA	NA	NA	NA	NA
CCDC3	ARAP3	CYBRD1	NA	CCDC97	NA	NA	NA	NA	NA	NA	NA	NA	NA	NA
CCDC34	ARHGAP11A	DCK	NA	CCNA2	NA	NA	NA	NA	NA	NA	NA	NA	NA	NA
CCDC58	ARHGAP17	DCTN4	NA	CCNB1	NA	NA	NA	NA	NA	NA	NA	NA	NA	NA
CCDC77	ARHGAP32	DCUN1D1	NA	CCNB2	NA	NA	NA	NA	NA	NA	NA	NA	NA	NA
CCDC86	ARHGAP42	DCUN1D4	NA	CCNF	NA	NA	NA	NA	NA	NA	NA	NA	NA	NA
CCDC89	ARHGDIA	DDX3X	NA	CD320	NA	NA	NA	NA	NA	NA	NA	NA	NA	NA
CCDC97	ARHGEF11	DEK	NA	CDC20	NA	NA	NA	NA	NA	NA	NA	NA	NA	NA
CCNA2	ARHGEF2	DHX40	NA	CDC25A	NA	NA	NA	NA	NA	NA	NA	NA	NA	NA
CCNB1	ARHGEF26	DKK3	NA	CDC25B	NA	NA	NA	NA	NA	NA	NA	NA	NA	NA
CCNB2	ARID1A	DLG1	NA	CDC25C	NA	NA	NA	NA	NA	NA	NA	NA	NA	NA
CCNF	ARID1B	DNAJB6	NA	CDC45	NA	NA	NA	NA	NA	NA	NA	NA	NA	NA
CD320	ARID2	DNM1L	NA	CDC6	NA	NA	NA	NA	NA	NA	NA	NA	NA	NA
CDC20	ARID3B	DOCK11	NA	CDC7	NA	NA	NA	NA	NA	NA	NA	NA	NA	NA
CDC25A	ARL13B	DPP4	NA	CDCA2	NA	NA	NA	NA	NA	NA	NA	NA	NA	NA
CDC25B	ARL4A	DROSHA	NA	CDCA3	NA	NA	NA	NA	NA	NA	NA	NA	NA	NA
CDC25C	ARL5A	DSP	NA	CDCA4	NA	NA	NA	NA	NA	NA	NA	NA	NA	NA
CDC45	ARL6IP1	DST	NA	CDCA5	NA	NA	NA	NA	NA	NA	NA	NA	NA	NA
CDC6	ARL9	DYNC1LI2	NA	CDCA7	NA	NA	NA	NA	NA	NA	NA	NA	NA	NA
CDC7	ARMC10	EEF1A1	NA	CDCA7L	NA	NA	NA	NA	NA	NA	NA	NA	NA	NA
CDCA2	ARMC6	EIF2AK1	NA	CDCA8	NA	NA	NA	NA	NA	NA	NA	NA	NA	NA
CDCA3	ARNTL2	EIF2AK3	NA	CDK1	NA	NA	NA	NA	NA	NA	NA	NA	NA	NA
CDCA4	ARRB2	EIF2S1	NA	CDK16	NA	NA	NA	NA	NA	NA	NA	NA	NA	NA
CDCA5	ARSI	EIF4B	NA	CDK4	NA	NA	NA	NA	NA	NA	NA	NA	NA	NA
CDCA7	ARSJ	EIF4G2	NA	CDKAL1	NA	NA	NA	NA	NA	NA	NA	NA	NA	NA
CDCA7L	ASF1A	ELOVL5	NA	CDKN1B	NA	NA	NA	NA	NA	NA	NA	NA	NA	NA
CDCA8	ASF1B	EPS8	NA	CDKN2C	NA	NA	NA	NA	NA	NA	NA	NA	NA	NA
CDK1	ASPM	ETAA1	NA	CDKN3	NA	NA	NA	NA	NA	NA	NA	NA	NA	NA
CDK16	ASTE1	EXT2	NA	CENPA	NA	NA	NA	NA	NA	NA	NA	NA	NA	NA
CDK4	ASXL1	EXTL2	NA	CENPF	NA	NA	NA	NA	NA	NA	NA	NA	NA	NA
CDKAL1	ASXL2	FAF2	NA	CENPH	NA	NA	NA	NA	NA	NA	NA	NA	NA	NA
CDKN1B	ATAD2	FAM172A	NA	CENPJ	NA	NA	NA	NA	NA	NA	NA	NA	NA	NA
CDKN2AIPNL	ATAD2B	FAM98A	NA	CENPM	NA	NA	NA	NA	NA	NA	NA	NA	NA	NA
CDKN2C	ATAD5	FBXO11	NA	CENPO	NA	NA	NA	NA	NA	NA	NA	NA	NA	NA
CDKN3	ATAT1	FHL1	NA	CENPP	NA	NA	NA	NA	NA	NA	NA	NA	NA	NA
CDON	ATF1	FKBP9	NA	CENPW	NA	NA	NA	NA	NA	NA	NA	NA	NA	NA
CENPA	ATF7IP	FNDC3B	NA	CEP250	NA	NA	NA	NA	NA	NA	NA	NA	NA	NA
CENPF	ATG4C	FRMD6	NA	CEP55	NA	NA	NA	NA	NA	NA	NA	NA	NA	NA
CENPH	ATIC	G3BP1	NA	CEP57	NA	NA	NA	NA	NA	NA	NA	NA	NA	NA
CENPJ	ATL2	G3BP2	NA	CEP72	NA	NA	NA	NA	NA	NA	NA	NA	NA	NA
CENPM	ATN1	GART	NA	CHAF1A	NA	NA	NA	NA	NA	NA	NA	NA	NA	NA
CENPO	ATP11C	GIN1	NA	CHAF1B	NA	NA	NA	NA	NA	NA	NA	NA	NA	NA
CENPP	ATP2B1	GIT2	NA	CHEK1	NA	NA	NA	NA	NA	NA	NA	NA	NA	NA
CENPW	ATPAF1	GLCCI1	NA	CHEK2	NA	NA	NA	NA	NA	NA	NA	NA	NA	NA
CEP250	ATR	GLO1	NA	CHKA	NA	NA	NA	NA	NA	NA	NA	NA	NA	NA
CEP55	ATXN2L	GLOD4	NA	CHRNA5	NA	NA	NA	NA	NA	NA	NA	NA	NA	NA
CEP57	AURKA	GLS	NA	CHTF18	NA	NA	NA	NA	NA	NA	NA	NA	NA	NA
CEP72	AURKB	GNAI1	NA	CIDEB	NA	NA	NA	NA	NA	NA	NA	NA	NA	NA
CHAF1A	AUTS2	GNAQ	NA	CIT	NA	NA	NA	NA	NA	NA	NA	NA	NA	NA
CHAF1B	AXL	GNG12	NA	CKS1B	NA	NA	NA	NA	NA	NA	NA	NA	NA	NA
CHD7	B3GALNT1	GNL3	NA	CLN6	NA	NA	NA	NA	NA	NA	NA	NA	NA	NA
CHEK1	B3GALNT2	GOLIM4	NA	CNDP2	NA	NA	NA	NA	NA	NA	NA	NA	NA	NA
CHEK2	B3GALT1	GOLPH3	NA	CNKSR3	NA	NA	NA	NA	NA	NA	NA	NA	NA	NA
CHKA	B3GNT5	GSPT2	NA	CNOT10	NA	NA	NA	NA	NA	NA	NA	NA	NA	NA
CHRNA5	B4GALT5	GYG1	NA	CNOT6	NA	NA	NA	NA	NA	NA	NA	NA	NA	NA
CHTF18	B4GALT6	HDAC1	NA	CNOT6L	NA	NA	NA	NA	NA	NA	NA	NA	NA	NA
CIDEB	BAALC	HDAC8	NA	COLEC12	NA	NA	NA	NA	NA	NA	NA	NA	NA	NA
CIT	BAG1	HIBADH	NA	COMMD10	NA	NA	NA	NA	NA	NA	NA	NA	NA	NA
CKS1B	BAG2	HIF1A	NA	COMMD4	NA	NA	NA	NA	NA	NA	NA	NA	NA	NA
CLN6	BANF1	HNRNPA1	NA	COQ2	NA	NA	NA	NA	NA	NA	NA	NA	NA	NA
CNDP2	BARD1	HSDL1	NA	COQ3	NA	NA	NA	NA	NA	NA	NA	NA	NA	NA
CNKSR3	BAZ1A	HSPA5	NA	CORO1A	NA	NA	NA	NA	NA	NA	NA	NA	NA	NA
CNOT10	BAZ1B	HSPA8	NA	CPNE2	NA	NA	NA	NA	NA	NA	NA	NA	NA	NA
CNOT6	BCCIP	HSPA9	NA	CPSF4	NA	NA	NA	NA	NA	NA	NA	NA	NA	NA
CNOT6L	BCL2L11	HSPD1	NA	CPSF6	NA	NA	NA	NA	NA	NA	NA	NA	NA	NA
COLEC12	BCL2L12	HSPH1	NA	CPSF7	NA	NA	NA	NA	NA	NA	NA	NA	NA	NA
COMMD10	BCL3	IFI16	NA	CPXM1	NA	NA	NA	NA	NA	NA	NA	NA	NA	NA
COMMD4	BCL9	IFNGR1	NA	CRISPLD1	NA	NA	NA	NA	NA	NA	NA	NA	NA	NA
COQ2	BCLAF1	IFT52	NA	CSE1L	NA	NA	NA	NA	NA	NA	NA	NA	NA	NA
COQ3	BCS1L	IGFBP3	NA	CTCF	NA	NA	NA	NA	NA	NA	NA	NA	NA	NA
CORO1A	BEND3	IKBIP	NA	CTDSPL2	NA	NA	NA	NA	NA	NA	NA	NA	NA	NA
CPNE2	BEND6	INTS6	NA	CTTNBP2	NA	NA	NA	NA	NA	NA	NA	NA	NA	NA
CPSF4	BHLHB9	IQGAP1	NA	CWF19L1	NA	NA	NA	NA	NA	NA	NA	NA	NA	NA
CPSF6	BIN3	ITGAV	NA	CXCL12	NA	NA	NA	NA	NA	NA	NA	NA	NA	NA
CPSF7	BIRC5	ITGB1	NA	CYB5RL	NA	NA	NA	NA	NA	NA	NA	NA	NA	NA
CPXM1	BLM	JAG1	NA	CYP1B1	NA	NA	NA	NA	NA	NA	NA	NA	NA	NA
CRISPLD1	BLMH	JAK1	NA	DAZAP1	NA	NA	NA	NA	NA	NA	NA	NA	NA	NA
CSE1L	BMPR1A	KCTD18	NA	DBF4B	NA	NA	NA	NA	NA	NA	NA	NA	NA	NA
CTCF	BMPR1B	KIF2A	NA	DCAF15	NA	NA	NA	NA	NA	NA	NA	NA	NA	NA
CTDSPL2	BNC1	KLF6	NA	DCLK2	NA	NA	NA	NA	NA	NA	NA	NA	NA	NA
CTTNBP2	BOD1	KLHL5	NA	DCLRE1B	NA	NA	NA	NA	NA	NA	NA	NA	NA	NA
CWF19L1	BOP1	KRIT1	NA	DCLRE1C	NA	NA	NA	NA	NA	NA	NA	NA	NA	NA
CXCL12	BRCA1	LACTB	NA	DCPS	NA	NA	NA	NA	NA	NA	NA	NA	NA	NA
CYB5R2	BRCA2	LAMP2	NA	DENND4B	NA	NA	NA	NA	NA	NA	NA	NA	NA	NA
CYB5RL	BRD1	LARS	NA	DEPDC1B	NA	NA	NA	NA	NA	NA	NA	NA	NA	NA
CYP1B1	BRD2	LGMN	NA	DET1	NA	NA	NA	NA	NA	NA	NA	NA	NA	NA
DAZAP1	BRD3	LMAN1	NA	DHFR	NA	NA	NA	NA	NA	NA	NA	NA	NA	NA
DBF4B	BRD4	LRP12	NA	DHX30	NA	NA	NA	NA	NA	NA	NA	NA	NA	NA
DCAF15	BRD7	LTV1	NA	DHX33	NA	NA	NA	NA	NA	NA	NA	NA	NA	NA
DCLK2	BRD8	LYN	NA	DHX9	NA	NA	NA	NA	NA	NA	NA	NA	NA	NA
DCLRE1B	BRD9	MAP1LC3B	NA	DIRAS3	NA	NA	NA	NA	NA	NA	NA	NA	NA	NA
DCLRE1C	BRIP1	MAP3K2	NA	DIS3L	NA	NA	NA	NA	NA	NA	NA	NA	NA	NA
DCPS	BRIX1	MAP3K7	NA	DLEU1	NA	NA	NA	NA	NA	NA	NA	NA	NA	NA
DENND4B	BRPF1	MAP4K3	NA	DMC1	NA	NA	NA	NA	NA	NA	NA	NA	NA	NA
DEPDC1B	BRPF3	MAPK6	NA	DNA2	NA	NA	NA	NA	NA	NA	NA	NA	NA	NA
DES	BTBD11	MAPKAP1	NA	DNAJA4	NA	NA	NA	NA	NA	NA	NA	NA	NA	NA
DET1	BTG3	MAT2B	NA	DNAJC9	NA	NA	NA	NA	NA	NA	NA	NA	NA	NA
DHFR	BTN3A1	MAX	NA	DNMT1	NA	NA	NA	NA	NA	NA	NA	NA	NA	NA
DHX30	BTN3A2	MBOAT2	NA	DOK5	NA	NA	NA	NA	NA	NA	NA	NA	NA	NA
DHX33	BUB1	METAP1	NA	DOK6	NA	NA	NA	NA	NA	NA	NA	NA	NA	NA
DHX9	BUB3	MFSD1	NA	DOLPP1	NA	NA	NA	NA	NA	NA	NA	NA	NA	NA
DIRAS3	BUD13	MIS12	NA	DPF1	NA	NA	NA	NA	NA	NA	NA	NA	NA	NA
DIS3L	BUD31	MKRN1	NA	DSC3	NA	NA	NA	NA	NA	NA	NA	NA	NA	NA
DLEU1	BYSL	MME	NA	DSG2	NA	NA	NA	NA	NA	NA	NA	NA	NA	NA
DMC1	C10ORF82	MOSPD1	NA	DSN1	NA	NA	NA	NA	NA	NA	NA	NA	NA	NA
DNA2	C11ORF49	MRPS27	NA	DTL	NA	NA	NA	NA	NA	NA	NA	NA	NA	NA
DNAJA4	C11ORF58	MRS2	NA	DTYMK	NA	NA	NA	NA	NA	NA	NA	NA	NA	NA
DNAJC9	C12ORF45	MSH6	NA	DUS3L	NA	NA	NA	NA	NA	NA	NA	NA	NA	NA
DNM3	C12ORF65	MSRB3	NA	DVL2	NA	NA	NA	NA	NA	NA	NA	NA	NA	NA
DNMT1	C12ORF66	NAP1L1	NA	E2F1	NA	NA	NA	NA	NA	NA	NA	NA	NA	NA
DOK5	C14ORF93	NAP1L4	NA	E2F8	NA	NA	NA	NA	NA	NA	NA	NA	NA	NA
DOK6	C15ORF41	NARS	NA	EARS2	NA	NA	NA	NA	NA	NA	NA	NA	NA	NA
DOLPP1	C17ORF53	NCBP2	NA	EBP	NA	NA	NA	NA	NA	NA	NA	NA	NA	NA
DPF1	C17ORF75	NCKAP1	NA	ECHDC3	NA	NA	NA	NA	NA	NA	NA	NA	NA	NA
DPPA4	C17ORF80	NCOA3	NA	EEF1A1	NA	NA	NA	NA	NA	NA	NA	NA	NA	NA
DRD1	C17ORF97	NCOA4	NA	EEFSEC	NA	NA	NA	NA	NA	NA	NA	NA	NA	NA
DSC3	C18ORF21	NECAP1	NA	EFTUD2	NA	NA	NA	NA	NA	NA	NA	NA	NA	NA
DSG2	C18ORF54	NNT	NA	EHMT2	NA	NA	NA	NA	NA	NA	NA	NA	NA	NA
DSN1	C19ORF44	NPTN	NA	ELAVL1	NA	NA	NA	NA	NA	NA	NA	NA	NA	NA
DTL	C19ORF48	NR2C1	NA	ELF2	NA	NA	NA	NA	NA	NA	NA	NA	NA	NA
DTYMK	C1ORF109	NRCAM	NA	EME1	NA	NA	NA	NA	NA	NA	NA	NA	NA	NA
DUS3L	C1ORF112	NSF	NA	EMG1	NA	NA	NA	NA	NA	NA	NA	NA	NA	NA
DVL2	C1ORF21	NSUN2	NA	ENPP2	NA	NA	NA	NA	NA	NA	NA	NA	NA	NA
E2F1	C1ORF220	NTN4	NA	EPB41	NA	NA	NA	NA	NA	NA	NA	NA	NA	NA
E2F8	C1ORF74	NUB1	NA	ERCC8	NA	NA	NA	NA	NA	NA	NA	NA	NA	NA
EARS2	C1QBP	NUCKS1	NA	ERI1	NA	NA	NA	NA	NA	NA	NA	NA	NA	NA
EBP	C20ORF96	NUP153	NA	ERI2	NA	NA	NA	NA	NA	NA	NA	NA	NA	NA
ECHDC3	C21ORF58	NUPL2	NA	ERLIN1	NA	NA	NA	NA	NA	NA	NA	NA	NA	NA
EEF1A1	C21ORF91	OGT	NA	ESCO2	NA	NA	NA	NA	NA	NA	NA	NA	NA	NA
EEFSEC	C2ORF42	OLA1	NA	ESPL1	NA	NA	NA	NA	NA	NA	NA	NA	NA	NA
EFTUD2	C2ORF69	OXR1	NA	EXO1	NA	NA	NA	NA	NA	NA	NA	NA	NA	NA
EHMT2	C3ORF14	PAPOLA	NA	EXOSC2	NA	NA	NA	NA	NA	NA	NA	NA	NA	NA
ELAVL1	C3ORF67	PAPSS1	NA	EXOSC3	NA	NA	NA	NA	NA	NA	NA	NA	NA	NA
ELF2	C4ORF33	PARN	NA	EXOSC5	NA	NA	NA	NA	NA	NA	NA	NA	NA	NA
EME1	C4ORF46	PDCD1LG2	NA	EXOSC8	NA	NA	NA	NA	NA	NA	NA	NA	NA	NA
EMG1	C5	PDE5A	NA	EXOSC9	NA	NA	NA	NA	NA	NA	NA	NA	NA	NA
ENDOD1	C5ORF34	PDIA6	NA	EZH2	NA	NA	NA	NA	NA	NA	NA	NA	NA	NA
ENOX1	C7ORF26	PFN2	NA	FAF1	NA	NA	NA	NA	NA	NA	NA	NA	NA	NA
ENPP2	C7ORF31	PGRMC1	NA	FAM110B	NA	NA	NA	NA	NA	NA	NA	NA	NA	NA
EPB41	C8ORF33	PHLDB2	NA	FAM111B	NA	NA	NA	NA	NA	NA	NA	NA	NA	NA
EPHA3	C8ORF48	PHTF2	NA	FAM129A	NA	NA	NA	NA	NA	NA	NA	NA	NA	NA
ERCC8	C8ORF59	PICALM	NA	FAM162B	NA	NA	NA	NA	NA	NA	NA	NA	NA	NA
ERI1	C9ORF64	PITPNB	NA	FAM192A	NA	NA	NA	NA	NA	NA	NA	NA	NA	NA
ERI2	CA12	PKD2	NA	FAM49A	NA	NA	NA	NA	NA	NA	NA	NA	NA	NA
ERLIN1	CABLES2	PLOD2	NA	FAM83B	NA	NA	NA	NA	NA	NA	NA	NA	NA	NA
ESCO2	CACHD1	PLRG1	NA	FAM83D	NA	NA	NA	NA	NA	NA	NA	NA	NA	NA
ESPL1	CACYBP	PLS3	NA	FANCA	NA	NA	NA	NA	NA	NA	NA	NA	NA	NA
EXO1	CAD	PNN	NA	FANCB	NA	NA	NA	NA	NA	NA	NA	NA	NA	NA
EXOSC2	CADPS2	POLE3	NA	FANCC	NA	NA	NA	NA	NA	NA	NA	NA	NA	NA
EXOSC3	CALCRL	PPM1B	NA	FANCD2	NA	NA	NA	NA	NA	NA	NA	NA	NA	NA
EXOSC5	CALM3	PPP1CB	NA	FANCE	NA	NA	NA	NA	NA	NA	NA	NA	NA	NA
EXOSC8	CALML4	PPP1R12A	NA	FANCG	NA	NA	NA	NA	NA	NA	NA	NA	NA	NA
EXOSC9	CAMK1G	PPP3R1	NA	FANCI	NA	NA	NA	NA	NA	NA	NA	NA	NA	NA
EZH2	CAMK4	PPP4R1	NA	FANCL	NA	NA	NA	NA	NA	NA	NA	NA	NA	NA
FAF1	CAMSAP1	PPP6R3	NA	FASN	NA	NA	NA	NA	NA	NA	NA	NA	NA	NA
FAM110B	CARD8	PPT1	NA	FAT3	NA	NA	NA	NA	NA	NA	NA	NA	NA	NA
FAM111B	CARM1	PRKDC	NA	FBL	NA	NA	NA	NA	NA	NA	NA	NA	NA	NA
FAM129A	CASC3	PRMT2	NA	FDXACB1	NA	NA	NA	NA	NA	NA	NA	NA	NA	NA
FAM13C	CASP2	PRMT3	NA	FEN1	NA	NA	NA	NA	NA	NA	NA	NA	NA	NA
FAM162B	CASP6	PRNP	NA	FKBP4	NA	NA	NA	NA	NA	NA	NA	NA	NA	NA
FAM192A	CASP7	PRPF4B	NA	FLOT1	NA	NA	NA	NA	NA	NA	NA	NA	NA	NA
FAM49A	CASP8	PRPS2	NA	FLVCR1	NA	NA	NA	NA	NA	NA	NA	NA	NA	NA
FAM83B	CASP8AP2	PSEN1	NA	FOXM1	NA	NA	NA	NA	NA	NA	NA	NA	NA	NA
FAM83D	CBFB	PTGES3	NA	FOXRED1	NA	NA	NA	NA	NA	NA	NA	NA	NA	NA
FANCA	CBL	PTPRK	NA	FOXRED2	NA	NA	NA	NA	NA	NA	NA	NA	NA	NA
FANCB	CBLL1	QKI	NA	FRZB	NA	NA	NA	NA	NA	NA	NA	NA	NA	NA
FANCC	CBR1	RAB5A	NA	FSD1	NA	NA	NA	NA	NA	NA	NA	NA	NA	NA
FANCD2	CBX3	RAB6A	NA	FST	NA	NA	NA	NA	NA	NA	NA	NA	NA	NA
FANCE	CBX5	RAD23B	NA	GABRE	NA	NA	NA	NA	NA	NA	NA	NA	NA	NA
FANCG	CC2D2A	RAP1B	NA	GALNT12	NA	NA	NA	NA	NA	NA	NA	NA	NA	NA
FANCI	CCAR1	RAP1GDS1	NA	GAS2L3	NA	NA	NA	NA	NA	NA	NA	NA	NA	NA
FANCL	CCDC117	RB1CC1	NA	GATA2	NA	NA	NA	NA	NA	NA	NA	NA	NA	NA
FASN	CCDC134	RBM25	NA	GCNT1	NA	NA	NA	NA	NA	NA	NA	NA	NA	NA
FAT3	CCDC137	RCAN1	NA	GDAP1	NA	NA	NA	NA	NA	NA	NA	NA	NA	NA
FBL	CCDC138	RCN1	NA	GEMIN4	NA	NA	NA	NA	NA	NA	NA	NA	NA	NA
FDXACB1	CCDC14	RDX	NA	GEMIN5	NA	NA	NA	NA	NA	NA	NA	NA	NA	NA
FEN1	CCDC15	REEP5	NA	GEN1	NA	NA	NA	NA	NA	NA	NA	NA	NA	NA
FGFRL1	CCDC150	RFC1	NA	GGA2	NA	NA	NA	NA	NA	NA	NA	NA	NA	NA
FKBP4	CCDC18	RHEB	NA	GIN1	NA	NA	NA	NA	NA	NA	NA	NA	NA	NA
FLOT1	CCDC34	RHOA	NA	GINS1	NA	NA	NA	NA	NA	NA	NA	NA	NA	NA
FLRT3	CCDC58	RIOK3	NA	GINS2	NA	NA	NA	NA	NA	NA	NA	NA	NA	NA
FLVCR1	CCDC59	RNF11	NA	GINS3	NA	NA	NA	NA	NA	NA	NA	NA	NA	NA
FOXM1	CCDC66	RNF145	NA	GLB1L	NA	NA	NA	NA	NA	NA	NA	NA	NA	NA
FOXRED1	CCDC77	RNFT1	NA	GLI3	NA	NA	NA	NA	NA	NA	NA	NA	NA	NA
FOXRED2	CCDC86	ROBO1	NA	GMEB1	NA	NA	NA	NA	NA	NA	NA	NA	NA	NA
FRZB	CCDC89	RORA	NA	GMNN	NA	NA	NA	NA	NA	NA	NA	NA	NA	NA
FSD1	CCDC97	RPE	NA	GNE	NA	NA	NA	NA	NA	NA	NA	NA	NA	NA
FST	CCHCR1	RPL15	NA	GOLM1	NA	NA	NA	NA	NA	NA	NA	NA	NA	NA
GABRE	CCNA2	RPS6KB1	NA	GPATCH4	NA	NA	NA	NA	NA	NA	NA	NA	NA	NA
GALNT12	CCNB1	RRM1	NA	GPC5	NA	NA	NA	NA	NA	NA	NA	NA	NA	NA
GAS2L3	CCNB2	RTN3	NA	GPC6	NA	NA	NA	NA	NA	NA	NA	NA	NA	NA
GATA2	CCNE2	SBNO1	NA	GPHN	NA	NA	NA	NA	NA	NA	NA	NA	NA	NA
GATAD2B	CCNF	SCLT1	NA	GPM6B	NA	NA	NA	NA	NA	NA	NA	NA	NA	NA
GCA	CCNI	SCOC	NA	GPR87	NA	NA	NA	NA	NA	NA	NA	NA	NA	NA
GCNT1	CCNJ	SDCBP	NA	GPSM2	NA	NA	NA	NA	NA	NA	NA	NA	NA	NA
GDAP1	CCNL1	SEC23A	NA	GPX7	NA	NA	NA	NA	NA	NA	NA	NA	NA	NA
GEMIN4	CCNT1	SECISBP2	NA	GRWD1	NA	NA	NA	NA	NA	NA	NA	NA	NA	NA
GEMIN5	CCT2	SENP2	NA	GSTM5	NA	NA	NA	NA	NA	NA	NA	NA	NA	NA
GEN1	CCT4	SERPINB7	NA	GTF3C2	NA	NA	NA	NA	NA	NA	NA	NA	NA	NA
GGA2	CCT5	SETD2	NA	GTF3C5	NA	NA	NA	NA	NA	NA	NA	NA	NA	NA
GIN1	CCT6A	SETD3	NA	GTSE1	NA	NA	NA	NA	NA	NA	NA	NA	NA	NA
GINS1	CCT7	SETD6	NA	GUF1	NA	NA	NA	NA	NA	NA	NA	NA	NA	NA
GINS2	CD320	SGPP1	NA	GUSB	NA	NA	NA	NA	NA	NA	NA	NA	NA	NA
GINS3	CD3EAP	SH3KBP1	NA	H1FX	NA	NA	NA	NA	NA	NA	NA	NA	NA	NA
GLB1L	CDAN1	SIN3A	NA	H2AFV	NA	NA	NA	NA	NA	NA	NA	NA	NA	NA
GLI3	CDC20	SLC16A1	NA	H2AFX	NA	NA	NA	NA	NA	NA	NA	NA	NA	NA
GMEB1	CDC23	SLC25A14	NA	H2AFY2	NA	NA	NA	NA	NA	NA	NA	NA	NA	NA
GMNN	CDC25A	SLC25A32	NA	H2AFZ	NA	NA	NA	NA	NA	NA	NA	NA	NA	NA
GNE	CDC25B	SLC30A7	NA	H3F3B	NA	NA	NA	NA	NA	NA	NA	NA	NA	NA
GOLM1	CDC25C	SLC39A6	NA	HADH	NA	NA	NA	NA	NA	NA	NA	NA	NA	NA
GPATCH4	CDC42EP1	SLFN5	NA	HAUS1	NA	NA	NA	NA	NA	NA	NA	NA	NA	NA
GPC5	CDC42EP4	SMAD4	NA	HAUS4	NA	NA	NA	NA	NA	NA	NA	NA	NA	NA
GPC6	CDC45	SMARCA2	NA	HAUS5	NA	NA	NA	NA	NA	NA	NA	NA	NA	NA
GPHN	CDC5L	SNAP23	NA	HAUS8	NA	NA	NA	NA	NA	NA	NA	NA	NA	NA
GPM6B	CDC6	SNIP1	NA	HCFC1	NA	NA	NA	NA	NA	NA	NA	NA	NA	NA
GPR19	CDC7	SPARC	NA	HCFC1R1	NA	NA	NA	NA	NA	NA	NA	NA	NA	NA
GPR87	CDCA2	SPTBN1	NA	HDAC1	NA	NA	NA	NA	NA	NA	NA	NA	NA	NA
GPSM2	CDCA3	SPTLC1	NA	HDGF	NA	NA	NA	NA	NA	NA	NA	NA	NA	NA
GPX7	CDCA4	SRSF1	NA	HEATR6	NA	NA	NA	NA	NA	NA	NA	NA	NA	NA
GRWD1	CDCA5	SRSF5	NA	HELLS	NA	NA	NA	NA	NA	NA	NA	NA	NA	NA
GSTM5	CDCA7	SSR3	NA	HIPK2	NA	NA	NA	NA	NA	NA	NA	NA	NA	NA
GSTO2	CDCA7L	STARD7	NA	HIRA	NA	NA	NA	NA	NA	NA	NA	NA	NA	NA
GTF3C2	CDCA8	STAT1	NA	HIRIP3	NA	NA	NA	NA	NA	NA	NA	NA	NA	NA
GTF3C5	CDH24	STAU1	NA	HIST1H1A	NA	NA	NA	NA	NA	NA	NA	NA	NA	NA
GTSE1	CDH6	STIL	NA	HIST1H1B	NA	NA	NA	NA	NA	NA	NA	NA	NA	NA
GUF1	CDK1	STIP1	NA	HIST1H1C	NA	NA	NA	NA	NA	NA	NA	NA	NA	NA
GUSB	CDK11A	STX12	NA	HIST1H1D	NA	NA	NA	NA	NA	NA	NA	NA	NA	NA
H1FX	CDK11B	STXBP5	NA	HIST1H1E	NA	NA	NA	NA	NA	NA	NA	NA	NA	NA
H2AFV	CDK14	SUCLG2	NA	HIST1H2AB	NA	NA	NA	NA	NA	NA	NA	NA	NA	NA
H2AFX	CDK16	SVIL	NA	HIST1H2AE	NA	NA	NA	NA	NA	NA	NA	NA	NA	NA
H2AFY2	CDK17	TAB2	NA	HIST1H2AH	NA	NA	NA	NA	NA	NA	NA	NA	NA	NA
H2AFZ	CDK2	TAF13	NA	HIST1H2AI	NA	NA	NA	NA	NA	NA	NA	NA	NA	NA
H3F3B	CDK4	TBCE	NA	HIST1H2AJ	NA	NA	NA	NA	NA	NA	NA	NA	NA	NA
HADH	CDK5RAP2	TCEA1	NA	HIST1H2AK	NA	NA	NA	NA	NA	NA	NA	NA	NA	NA
HAUS1	CDKAL1	TM9SF3	NA	HIST1H2AL	NA	NA	NA	NA	NA	NA	NA	NA	NA	NA
HAUS4	CDKL1	TM9SF4	NA	HIST1H2AM	NA	NA	NA	NA	NA	NA	NA	NA	NA	NA
HAUS5	CDKN1B	TMED2	NA	HIST1H2BB	NA	NA	NA	NA	NA	NA	NA	NA	NA	NA
HAUS8	CDKN2AIP	TMEM184C	NA	HIST1H2BC	NA	NA	NA	NA	NA	NA	NA	NA	NA	NA
HCFC1	CDKN2C	TMPO	NA	HIST1H2BE	NA	NA	NA	NA	NA	NA	NA	NA	NA	NA
HCFC1R1	CDKN3	TMX1	NA	HIST1H2BF	NA	NA	NA	NA	NA	NA	NA	NA	NA	NA
HDAC1	CDO1	TNC	NA	HIST1H2BG	NA	NA	NA	NA	NA	NA	NA	NA	NA	NA
HDGF	CDT1	TNFSF18	NA	HIST1H2BH	NA	NA	NA	NA	NA	NA	NA	NA	NA	NA
HEATR6	CELF1	TOMM20	NA	HIST1H2BI	NA	NA	NA	NA	NA	NA	NA	NA	NA	NA
HELLS	CENPA	TOP2A	NA	HIST1H2BL	NA	NA	NA	NA	NA	NA	NA	NA	NA	NA
HIPK2	CENPE	TPM3	NA	HIST1H2BM	NA	NA	NA	NA	NA	NA	NA	NA	NA	NA
HIRA	CENPF	TRA2A	NA	HIST1H2BO	NA	NA	NA	NA	NA	NA	NA	NA	NA	NA
HIRIP3	CENPH	TRAPPC8	NA	HIST1H3A	NA	NA	NA	NA	NA	NA	NA	NA	NA	NA
HIST1H1A	CENPI	TRIM37	NA	HIST1H3B	NA	NA	NA	NA	NA	NA	NA	NA	NA	NA
HIST1H1B	CENPJ	TRPS1	NA	HIST1H3C	NA	NA	NA	NA	NA	NA	NA	NA	NA	NA
HIST1H1C	CENPK	TTC19	NA	HIST1H3E	NA	NA	NA	NA	NA	NA	NA	NA	NA	NA
HIST1H1D	CENPL	TTC3	NA	HIST1H3F	NA	NA	NA	NA	NA	NA	NA	NA	NA	NA
HIST1H1E	CENPM	TTC39B	NA	HIST1H3G	NA	NA	NA	NA	NA	NA	NA	NA	NA	NA
HIST1H2AB	CENPN	TWF1	NA	HIST1H3H	NA	NA	NA	NA	NA	NA	NA	NA	NA	NA
HIST1H2AE	CENPO	TXNIP	NA	HIST1H3I	NA	NA	NA	NA	NA	NA	NA	NA	NA	NA
HIST1H2AH	CENPP	TXNRD1	NA	HIST1H3J	NA	NA	NA	NA	NA	NA	NA	NA	NA	NA
HIST1H2AI	CENPQ	UACA	NA	HIST1H4A	NA	NA	NA	NA	NA	NA	NA	NA	NA	NA
HIST1H2AJ	CENPV	UBA2	NA	HIST1H4B	NA	NA	NA	NA	NA	NA	NA	NA	NA	NA
HIST1H2AK	CENPW	UBAC2	NA	HIST1H4C	NA	NA	NA	NA	NA	NA	NA	NA	NA	NA
HIST1H2AL	CEP120	UBAP1	NA	HIST1H4D	NA	NA	NA	NA	NA	NA	NA	NA	NA	NA
HIST1H2AM	CEP135	UBE4A	NA	HIST1H4I	NA	NA	NA	NA	NA	NA	NA	NA	NA	NA
HIST1H2BB	CEP152	UBXN2A	NA	HIST1H4L	NA	NA	NA	NA	NA	NA	NA	NA	NA	NA
HIST1H2BC	CEP192	UGDH	NA	HIST2H2AB	NA	NA	NA	NA	NA	NA	NA	NA	NA	NA
HIST1H2BE	CEP250	USP10	NA	HIST2H2AC	NA	NA	NA	NA	NA	NA	NA	NA	NA	NA
HIST1H2BF	CEP55	USP34	NA	HIST3H2A	NA	NA	NA	NA	NA	NA	NA	NA	NA	NA
HIST1H2BG	CEP57	USP7	NA	HIST3H2BB	NA	NA	NA	NA	NA	NA	NA	NA	NA	NA
HIST1H2BH	CEP70	USP8	NA	HJURP	NA	NA	NA	NA	NA	NA	NA	NA	NA	NA
HIST1H2BI	CEP72	UTP6	NA	HMBS	NA	NA	NA	NA	NA	NA	NA	NA	NA	NA
HIST1H2BL	CEP76	VAMP3	NA	HMGB2	NA	NA	NA	NA	NA	NA	NA	NA	NA	NA
HIST1H2BM	CEP78	VCAN	NA	HMGB3	NA	NA	NA	NA	NA	NA	NA	NA	NA	NA
HIST1H2BO	CEP97	VPS45	NA	HMGN1	NA	NA	NA	NA	NA	NA	NA	NA	NA	NA
HIST1H3A	CERK	WAC	NA	HMGN2	NA	NA	NA	NA	NA	NA	NA	NA	NA	NA
HIST1H3B	CHAC2	WDR11	NA	HMGXB4	NA	NA	NA	NA	NA	NA	NA	NA	NA	NA
HIST1H3C	CHAF1A	WDR44	NA	HNRNPD	NA	NA	NA	NA	NA	NA	NA	NA	NA	NA
HIST1H3E	CHAF1B	WIPF1	NA	HNRNPF	NA	NA	NA	NA	NA	NA	NA	NA	NA	NA
HIST1H3F	CHCHD2	WNT5A	NA	HNRNPL	NA	NA	NA	NA	NA	NA	NA	NA	NA	NA
HIST1H3G	CHCHD3	WSB1	NA	HNRNPM	NA	NA	NA	NA	NA	NA	NA	NA	NA	NA
HIST1H3H	CHD1	WTAP	NA	HNRNPUL1	NA	NA	NA	NA	NA	NA	NA	NA	NA	NA
HIST1H3I	CHD1L	XPO1	NA	HOXA2	NA	NA	NA	NA	NA	NA	NA	NA	NA	NA
HIST1H3J	CHD3	XRN2	NA	HOXA3	NA	NA	NA	NA	NA	NA	NA	NA	NA	NA
HIST1H4A	CHD4	YME1L1	NA	HOXA4	NA	NA	NA	NA	NA	NA	NA	NA	NA	NA
HIST1H4B	CHEK1	YWHAQ	NA	HOXA5	NA	NA	NA	NA	NA	NA	NA	NA	NA	NA
HIST1H4C	CHEK2	YWHAZ	NA	HOXA6	NA	NA	NA	NA	NA	NA	NA	NA	NA	NA
HIST1H4D	CHERP	ZC3HAV1	NA	HOXA7	NA	NA	NA	NA	NA	NA	NA	NA	NA	NA
HIST1H4I	CHKA	ZFAND6	NA	HOXC5	NA	NA	NA	NA	NA	NA	NA	NA	NA	NA
HIST1H4L	CHRAC1	ZFR	NA	HPDL	NA	NA	NA	NA	NA	NA	NA	NA	NA	NA
HIST2H2AB	CHRM2	ZMPSTE24	NA	HPS4	NA	NA	NA	NA	NA	NA	NA	NA	NA	NA
HIST2H2AC	CHRNA5	ZNF155	NA	HSF2	NA	NA	NA	NA	NA	NA	NA	NA	NA	NA
HIST3H2A	CHTF18	ZNF175	NA	HSPB11	NA	NA	NA	NA	NA	NA	NA	NA	NA	NA
HIST3H2BB	CIDEB	ZNF292	NA	HSPBAP1	NA	NA	NA	NA	NA	NA	NA	NA	NA	NA
HJURP	CISD2	ZNF544	NA	HSPD1	NA	NA	NA	NA	NA	NA	NA	NA	NA	NA
HMBS	CIT	ZNF791	NA	HTATSF1	NA	NA	NA	NA	NA	NA	NA	NA	NA	NA
HMGB2	CKAP2	ZNHIT6	NA	HYLS1	NA	NA	NA	NA	NA	NA	NA	NA	NA	NA
HMGB3	CKAP2L	NA	NA	IGSF10	NA	NA	NA	NA	NA	NA	NA	NA	NA	NA
HMGN1	CKAP5	NA	NA	IKZF4	NA	NA	NA	NA	NA	NA	NA	NA	NA	NA
HMGN2	CKS1B	NA	NA	IL18R1	NA	NA	NA	NA	NA	NA	NA	NA	NA	NA
HMGXB4	CKS2	NA	NA	IL1R1	NA	NA	NA	NA	NA	NA	NA	NA	NA	NA
HNRNPD	CLASRP	NA	NA	IL31RA	NA	NA	NA	NA	NA	NA	NA	NA	NA	NA
HNRNPF	CLDN11	NA	NA	IL6R	NA	NA	NA	NA	NA	NA	NA	NA	NA	NA
HNRNPL	CLK2	NA	NA	INTS2	NA	NA	NA	NA	NA	NA	NA	NA	NA	NA
HNRNPM	CLN6	NA	NA	INTS7	NA	NA	NA	NA	NA	NA	NA	NA	NA	NA
HNRNPUL1	CLNS1A	NA	NA	IPO4	NA	NA	NA	NA	NA	NA	NA	NA	NA	NA
HOXA2	CLPB	NA	NA	IPO9	NA	NA	NA	NA	NA	NA	NA	NA	NA	NA
HOXA3	CLSPN	NA	NA	IQCC	NA	NA	NA	NA	NA	NA	NA	NA	NA	NA
HOXA4	CLUAP1	NA	NA	IQGAP3	NA	NA	NA	NA	NA	NA	NA	NA	NA	NA
HOXA5	CMC1	NA	NA	IRAK3	NA	NA	NA	NA	NA	NA	NA	NA	NA	NA
HOXA6	CNBP	NA	NA	ISLR	NA	NA	NA	NA	NA	NA	NA	NA	NA	NA
HOXA7	CNDP2	NA	NA	ITGB3BP	NA	NA	NA	NA	NA	NA	NA	NA	NA	NA
HOXB8	CNKSR3	NA	NA	KAT5	NA	NA	NA	NA	NA	NA	NA	NA	NA	NA
HOXC5	CNOT1	NA	NA	KCNE4	NA	NA	NA	NA	NA	NA	NA	NA	NA	NA
HPDL	CNOT10	NA	NA	KCNIP3	NA	NA	NA	NA	NA	NA	NA	NA	NA	NA
HPS4	CNOT3	NA	NA	KHDRBS1	NA	NA	NA	NA	NA	NA	NA	NA	NA	NA
HSF2	CNOT6	NA	NA	KHK	NA	NA	NA	NA	NA	NA	NA	NA	NA	NA
HSPB11	CNOT6L	NA	NA	KHSRP	NA	NA	NA	NA	NA	NA	NA	NA	NA	NA
HSPBAP1	CNOT7	NA	NA	KIAA0586	NA	NA	NA	NA	NA	NA	NA	NA	NA	NA
HSPD1	CNRIP1	NA	NA	KIF11	NA	NA	NA	NA	NA	NA	NA	NA	NA	NA
HTATSF1	CNTLN	NA	NA	KIF15	NA	NA	NA	NA	NA	NA	NA	NA	NA	NA
HYLS1	CNTROB	NA	NA	KIF18B	NA	NA	NA	NA	NA	NA	NA	NA	NA	NA
IGSF10	COASY	NA	NA	KIF20A	NA	NA	NA	NA	NA	NA	NA	NA	NA	NA
IKZF4	COG7	NA	NA	KIF22	NA	NA	NA	NA	NA	NA	NA	NA	NA	NA
IL18R1	COIL	NA	NA	KIF24	NA	NA	NA	NA	NA	NA	NA	NA	NA	NA
IL1R1	COL12A1	NA	NA	KIF2C	NA	NA	NA	NA	NA	NA	NA	NA	NA	NA
IL31RA	COL6A3	NA	NA	KIF4A	NA	NA	NA	NA	NA	NA	NA	NA	NA	NA
IL6R	COLEC12	NA	NA	KIFC1	NA	NA	NA	NA	NA	NA	NA	NA	NA	NA
INTS2	COMMD10	NA	NA	KLF3	NA	NA	NA	NA	NA	NA	NA	NA	NA	NA
INTS7	COMMD4	NA	NA	KNTC1	NA	NA	NA	NA	NA	NA	NA	NA	NA	NA
IPO4	COQ2	NA	NA	KRT19	NA	NA	NA	NA	NA	NA	NA	NA	NA	NA
IPO9	COQ3	NA	NA	KRT7	NA	NA	NA	NA	NA	NA	NA	NA	NA	NA
IQCC	COQ7	NA	NA	L2HGDH	NA	NA	NA	NA	NA	NA	NA	NA	NA	NA
IQGAP3	CORO1A	NA	NA	LAS1L	NA	NA	NA	NA	NA	NA	NA	NA	NA	NA
IRAK3	COX10	NA	NA	LBR	NA	NA	NA	NA	NA	NA	NA	NA	NA	NA
ISLR	COX18	NA	NA	LCMT2	NA	NA	NA	NA	NA	NA	NA	NA	NA	NA
ITGB3BP	CPEB1	NA	NA	LDHB	NA	NA	NA	NA	NA	NA	NA	NA	NA	NA
IVNS1ABP	CPNE2	NA	NA	LIAS	NA	NA	NA	NA	NA	NA	NA	NA	NA	NA
KALRN	CPS1	NA	NA	LIFR	NA	NA	NA	NA	NA	NA	NA	NA	NA	NA
KAT5	CPSF2	NA	NA	LIG1	NA	NA	NA	NA	NA	NA	NA	NA	NA	NA
KCNE4	CPSF3	NA	NA	LIG3	NA	NA	NA	NA	NA	NA	NA	NA	NA	NA
KCNH5	CPSF4	NA	NA	LIN52	NA	NA	NA	NA	NA	NA	NA	NA	NA	NA
KCNIP3	CPSF6	NA	NA	LIN9	NA	NA	NA	NA	NA	NA	NA	NA	NA	NA
KCTD12	CPSF7	NA	NA	LMNB1	NA	NA	NA	NA	NA	NA	NA	NA	NA	NA
KHDRBS1	CPXM1	NA	NA	LMNB2	NA	NA	NA	NA	NA	NA	NA	NA	NA	NA
KHK	CRABP2	NA	NA	LMO4	NA	NA	NA	NA	NA	NA	NA	NA	NA	NA
KHSRP	CREB1	NA	NA	LONRF1	NA	NA	NA	NA	NA	NA	NA	NA	NA	NA
KIAA0586	CREB3L2	NA	NA	LRRC49	NA	NA	NA	NA	NA	NA	NA	NA	NA	NA
KIF11	CREBBP	NA	NA	LRRC61	NA	NA	NA	NA	NA	NA	NA	NA	NA	NA
KIF15	CREBZF	NA	NA	LRRC8B	NA	NA	NA	NA	NA	NA	NA	NA	NA	NA
KIF18B	CRISPLD1	NA	NA	LRRCC1	NA	NA	NA	NA	NA	NA	NA	NA	NA	NA
KIF20A	CRNKL1	NA	NA	LRRN1	NA	NA	NA	NA	NA	NA	NA	NA	NA	NA
KIF21A	CROT	NA	NA	LSM2	NA	NA	NA	NA	NA	NA	NA	NA	NA	NA
KIF22	CS	NA	NA	MAB21L2	NA	NA	NA	NA	NA	NA	NA	NA	NA	NA
KIF24	CSE1L	NA	NA	MAD2L1	NA	NA	NA	NA	NA	NA	NA	NA	NA	NA
KIF2C	CSNK2A2	NA	NA	MAD2L2	NA	NA	NA	NA	NA	NA	NA	NA	NA	NA
KIF4A	CSTF1	NA	NA	MAOB	NA	NA	NA	NA	NA	NA	NA	NA	NA	NA
KIFC1	CSTF2	NA	NA	MAP2K6	NA	NA	NA	NA	NA	NA	NA	NA	NA	NA
KLF3	CSTF2T	NA	NA	MAT2B	NA	NA	NA	NA	NA	NA	NA	NA	NA	NA
KNTC1	CTBP1	NA	NA	MBNL3	NA	NA	NA	NA	NA	NA	NA	NA	NA	NA
KRT19	CTBP2	NA	NA	MBOAT1	NA	NA	NA	NA	NA	NA	NA	NA	NA	NA
KRT7	CTCF	NA	NA	MCM10	NA	NA	NA	NA	NA	NA	NA	NA	NA	NA
L2HGDH	CTDNEP1	NA	NA	MCM2	NA	NA	NA	NA	NA	NA	NA	NA	NA	NA
LAS1L	CTDSP2	NA	NA	MCM3	NA	NA	NA	NA	NA	NA	NA	NA	NA	NA
LBR	CTDSPL2	NA	NA	MCM4	NA	NA	NA	NA	NA	NA	NA	NA	NA	NA
LCMT2	CTNNAL1	NA	NA	MCM5	NA	NA	NA	NA	NA	NA	NA	NA	NA	NA
LDHB	CTNNBL1	NA	NA	MCM6	NA	NA	NA	NA	NA	NA	NA	NA	NA	NA
LIAS	CTPS2	NA	NA	MCM7	NA	NA	NA	NA	NA	NA	NA	NA	NA	NA
LIFR	CTSC	NA	NA	MCM8	NA	NA	NA	NA	NA	NA	NA	NA	NA	NA
LIG1	CTTNBP2	NA	NA	MCRS1	NA	NA	NA	NA	NA	NA	NA	NA	NA	NA
LIG3	CUL1	NA	NA	MDC1	NA	NA	NA	NA	NA	NA	NA	NA	NA	NA
LIN52	CUTC	NA	NA	MDK	NA	NA	NA	NA	NA	NA	NA	NA	NA	NA
LIN9	CWC22	NA	NA	MDN1	NA	NA	NA	NA	NA	NA	NA	NA	NA	NA
LMNB1	CWC25	NA	NA	MED1	NA	NA	NA	NA	NA	NA	NA	NA	NA	NA
LMNB2	CWC27	NA	NA	MID1	NA	NA	NA	NA	NA	NA	NA	NA	NA	NA
LMO4	CWF19L1	NA	NA	MID2	NA	NA	NA	NA	NA	NA	NA	NA	NA	NA
LONRF1	CWF19L2	NA	NA	MIS12	NA	NA	NA	NA	NA	NA	NA	NA	NA	NA
LRRC49	CXCL12	NA	NA	MKI67	NA	NA	NA	NA	NA	NA	NA	NA	NA	NA
LRRC61	CXXC1	NA	NA	MKS1	NA	NA	NA	NA	NA	NA	NA	NA	NA	NA
LRRC8B	CYB5RL	NA	NA	MLH1	NA	NA	NA	NA	NA	NA	NA	NA	NA	NA
LRRCC1	CYP1B1	NA	NA	MLPH	NA	NA	NA	NA	NA	NA	NA	NA	NA	NA
LRRN1	DARS	NA	NA	MMACHC	NA	NA	NA	NA	NA	NA	NA	NA	NA	NA
LSM2	DARS2	NA	NA	MND1	NA	NA	NA	NA	NA	NA	NA	NA	NA	NA
MAB21L2	DAZAP1	NA	NA	MNS1	NA	NA	NA	NA	NA	NA	NA	NA	NA	NA
MAD2L1	DAZAP2	NA	NA	MRPL48	NA	NA	NA	NA	NA	NA	NA	NA	NA	NA
MAD2L2	DBF4	NA	NA	MRPL9	NA	NA	NA	NA	NA	NA	NA	NA	NA	NA
MAOA	DBF4B	NA	NA	MRPS27	NA	NA	NA	NA	NA	NA	NA	NA	NA	NA
MAOB	DBI	NA	NA	MRPS31	NA	NA	NA	NA	NA	NA	NA	NA	NA	NA
MAP2K6	DCAF12	NA	NA	MRRF	NA	NA	NA	NA	NA	NA	NA	NA	NA	NA
MAT2B	DCAF15	NA	NA	MRTO4	NA	NA	NA	NA	NA	NA	NA	NA	NA	NA
MBD4	DCAF16	NA	NA	MSH2	NA	NA	NA	NA	NA	NA	NA	NA	NA	NA
MBNL3	DCAF17	NA	NA	MSH6	NA	NA	NA	NA	NA	NA	NA	NA	NA	NA
MBOAT1	DCLK2	NA	NA	MT1A	NA	NA	NA	NA	NA	NA	NA	NA	NA	NA
MBOAT2	DCLRE1A	NA	NA	MTA2	NA	NA	NA	NA	NA	NA	NA	NA	NA	NA
MCM10	DCLRE1B	NA	NA	MTHFD1	NA	NA	NA	NA	NA	NA	NA	NA	NA	NA
MCM2	DCLRE1C	NA	NA	MTMR4	NA	NA	NA	NA	NA	NA	NA	NA	NA	NA
MCM3	DCP2	NA	NA	MXD3	NA	NA	NA	NA	NA	NA	NA	NA	NA	NA
MCM4	DCPS	NA	NA	MYBL2	NA	NA	NA	NA	NA	NA	NA	NA	NA	NA
MCM5	DCUN1D5	NA	NA	MYO19	NA	NA	NA	NA	NA	NA	NA	NA	NA	NA
MCM6	DDX10	NA	NA	MYPN	NA	NA	NA	NA	NA	NA	NA	NA	NA	NA
MCM7	DDX17	NA	NA	NARS2	NA	NA	NA	NA	NA	NA	NA	NA	NA	NA
MCM8	DDX18	NA	NA	NASP	NA	NA	NA	NA	NA	NA	NA	NA	NA	NA
MCRS1	DDX21	NA	NA	NAT10	NA	NA	NA	NA	NA	NA	NA	NA	NA	NA
MDC1	DDX23	NA	NA	NCAPD2	NA	NA	NA	NA	NA	NA	NA	NA	NA	NA
MDGA1	DDX27	NA	NA	NCAPD3	NA	NA	NA	NA	NA	NA	NA	NA	NA	NA
MDK	DDX31	NA	NA	NCAPG2	NA	NA	NA	NA	NA	NA	NA	NA	NA	NA
MDN1	DDX46	NA	NA	NCAPH	NA	NA	NA	NA	NA	NA	NA	NA	NA	NA
MED1	DDX54	NA	NA	NCOA5	NA	NA	NA	NA	NA	NA	NA	NA	NA	NA
MED12L	DDX55	NA	NA	NDC80	NA	NA	NA	NA	NA	NA	NA	NA	NA	NA
MID1	DDX56	NA	NA	NDE1	NA	NA	NA	NA	NA	NA	NA	NA	NA	NA
MID2	DDX60	NA	NA	NDP	NA	NA	NA	NA	NA	NA	NA	NA	NA	NA
MIS12	DEK	NA	NA	NEFH	NA	NA	NA	NA	NA	NA	NA	NA	NA	NA
MKI67	DENND1B	NA	NA	NEIL3	NA	NA	NA	NA	NA	NA	NA	NA	NA	NA
MKS1	DENND4B	NA	NA	NEK2	NA	NA	NA	NA	NA	NA	NA	NA	NA	NA
MLH1	DEPDC1	NA	NA	NETO2	NA	NA	NA	NA	NA	NA	NA	NA	NA	NA
MLPH	DEPDC1B	NA	NA	NFIA	NA	NA	NA	NA	NA	NA	NA	NA	NA	NA
MMACHC	DEPDC4	NA	NA	NFIB	NA	NA	NA	NA	NA	NA	NA	NA	NA	NA
MND1	DEPDC5	NA	NA	NFYA	NA	NA	NA	NA	NA	NA	NA	NA	NA	NA
MNS1	DERA	NA	NA	NHEJ1	NA	NA	NA	NA	NA	NA	NA	NA	NA	NA
MRPL48	DET1	NA	NA	NHP2	NA	NA	NA	NA	NA	NA	NA	NA	NA	NA
MRPL9	DGKD	NA	NA	NIF3L1	NA	NA	NA	NA	NA	NA	NA	NA	NA	NA
MRPS27	DHFR	NA	NA	NNAT	NA	NA	NA	NA	NA	NA	NA	NA	NA	NA
MRPS31	DHODH	NA	NA	NOC4L	NA	NA	NA	NA	NA	NA	NA	NA	NA	NA
MRRF	DHPS	NA	NA	NOD1	NA	NA	NA	NA	NA	NA	NA	NA	NA	NA
MRTO4	DHX15	NA	NA	NOL12	NA	NA	NA	NA	NA	NA	NA	NA	NA	NA
MSH2	DHX30	NA	NA	NOL9	NA	NA	NA	NA	NA	NA	NA	NA	NA	NA
MSH6	DHX33	NA	NA	NOLC1	NA	NA	NA	NA	NA	NA	NA	NA	NA	NA
MT1A	DHX35	NA	NA	NONO	NA	NA	NA	NA	NA	NA	NA	NA	NA	NA
MTA2	DHX36	NA	NA	NOV	NA	NA	NA	NA	NA	NA	NA	NA	NA	NA
MTHFD1	DHX37	NA	NA	NOVA1	NA	NA	NA	NA	NA	NA	NA	NA	NA	NA
MTMR4	DHX38	NA	NA	NPRL3	NA	NA	NA	NA	NA	NA	NA	NA	NA	NA
MXD3	DHX57	NA	NA	NQO1	NA	NA	NA	NA	NA	NA	NA	NA	NA	NA
MYBL2	DHX8	NA	NA	NQO2	NA	NA	NA	NA	NA	NA	NA	NA	NA	NA
MYO19	DHX9	NA	NA	NR2C2AP	NA	NA	NA	NA	NA	NA	NA	NA	NA	NA
MYPN	DIAPH3	NA	NA	NR2F1	NA	NA	NA	NA	NA	NA	NA	NA	NA	NA
NAP1L3	DIDO1	NA	NA	NRM	NA	NA	NA	NA	NA	NA	NA	NA	NA	NA
NARS2	DIRAS3	NA	NA	NRP1	NA	NA	NA	NA	NA	NA	NA	NA	NA	NA
NASP	DIS3L	NA	NA	NSL1	NA	NA	NA	NA	NA	NA	NA	NA	NA	NA
NAT10	DIS3L2	NA	NA	NSMCE4A	NA	NA	NA	NA	NA	NA	NA	NA	NA	NA
NCAPD2	DKC1	NA	NA	NUDT21	NA	NA	NA	NA	NA	NA	NA	NA	NA	NA
NCAPD3	DLEU1	NA	NA	NUF2	NA	NA	NA	NA	NA	NA	NA	NA	NA	NA
NCAPG2	DLG3	NA	NA	NUP107	NA	NA	NA	NA	NA	NA	NA	NA	NA	NA
NCAPH	DLGAP5	NA	NA	NUP133	NA	NA	NA	NA	NA	NA	NA	NA	NA	NA
NCOA5	DMC1	NA	NA	NUP205	NA	NA	NA	NA	NA	NA	NA	NA	NA	NA
NDC80	DNA2	NA	NA	NUP214	NA	NA	NA	NA	NA	NA	NA	NA	NA	NA
NDE1	DNAJA4	NA	NA	NUP35	NA	NA	NA	NA	NA	NA	NA	NA	NA	NA
NDP	DNAJC14	NA	NA	NUP85	NA	NA	NA	NA	NA	NA	NA	NA	NA	NA
NEFH	DNAJC2	NA	NA	NUP88	NA	NA	NA	NA	NA	NA	NA	NA	NA	NA
NEIL3	DNAJC22	NA	NA	NUP93	NA	NA	NA	NA	NA	NA	NA	NA	NA	NA
NEK2	DNAJC9	NA	NA	NUSAP1	NA	NA	NA	NA	NA	NA	NA	NA	NA	NA
NETO2	DNALI1	NA	NA	NXT2	NA	NA	NA	NA	NA	NA	NA	NA	NA	NA
NFIA	DNMT1	NA	NA	OAS3	NA	NA	NA	NA	NA	NA	NA	NA	NA	NA
NFIB	DNMT3A	NA	NA	ODC1	NA	NA	NA	NA	NA	NA	NA	NA	NA	NA
NFYA	DNMT3B	NA	NA	OIP5	NA	NA	NA	NA	NA	NA	NA	NA	NA	NA
NHEJ1	DNTTIP2	NA	NA	OLFML2B	NA	NA	NA	NA	NA	NA	NA	NA	NA	NA
NHP2	DOCK10	NA	NA	ORC1	NA	NA	NA	NA	NA	NA	NA	NA	NA	NA
NIF3L1	DOCK11	NA	NA	OSGEPL1	NA	NA	NA	NA	NA	NA	NA	NA	NA	NA
NNAT	DOK5	NA	NA	OXNAD1	NA	NA	NA	NA	NA	NA	NA	NA	NA	NA
NOC4L	DOK6	NA	NA	PA2G4	NA	NA	NA	NA	NA	NA	NA	NA	NA	NA
NOD1	DOLPP1	NA	NA	PAFAH1B3	NA	NA	NA	NA	NA	NA	NA	NA	NA	NA
NOL12	DONSON	NA	NA	PAICS	NA	NA	NA	NA	NA	NA	NA	NA	NA	NA
NOL9	DOT1L	NA	NA	PAK3	NA	NA	NA	NA	NA	NA	NA	NA	NA	NA
NOLC1	DPF1	NA	NA	PARP1	NA	NA	NA	NA	NA	NA	NA	NA	NA	NA
NONO	DPF3	NA	NA	PASK	NA	NA	NA	NA	NA	NA	NA	NA	NA	NA
NOV	DPH5	NA	NA	PATZ1	NA	NA	NA	NA	NA	NA	NA	NA	NA	NA
NOVA1	DPYD	NA	NA	PAXIP1	NA	NA	NA	NA	NA	NA	NA	NA	NA	NA
NPRL3	DPYSL3	NA	NA	PBK	NA	NA	NA	NA	NA	NA	NA	NA	NA	NA
NQO1	DROSHA	NA	NA	PCIF1	NA	NA	NA	NA	NA	NA	NA	NA	NA	NA
NQO2	DSC3	NA	NA	PCNT	NA	NA	NA	NA	NA	NA	NA	NA	NA	NA
NR2C2AP	DSCC1	NA	NA	PDE3B	NA	NA	NA	NA	NA	NA	NA	NA	NA	NA
NR2F1	DSEL	NA	NA	PDGFRA	NA	NA	NA	NA	NA	NA	NA	NA	NA	NA
NRM	DSG2	NA	NA	PEG10	NA	NA	NA	NA	NA	NA	NA	NA	NA	NA
NRP1	DSN1	NA	NA	PELI2	NA	NA	NA	NA	NA	NA	NA	NA	NA	NA
NSL1	DSTYK	NA	NA	PFAS	NA	NA	NA	NA	NA	NA	NA	NA	NA	NA
NSMCE4A	DTL	NA	NA	PGD	NA	NA	NA	NA	NA	NA	NA	NA	NA	NA
NTNG1	DTYMK	NA	NA	PHB2	NA	NA	NA	NA	NA	NA	NA	NA	NA	NA
NUDT21	DUS1L	NA	NA	PHC1	NA	NA	NA	NA	NA	NA	NA	NA	NA	NA
NUF2	DUS3L	NA	NA	PHF14	NA	NA	NA	NA	NA	NA	NA	NA	NA	NA
NUP107	DUS4L	NA	NA	PHF19	NA	NA	NA	NA	NA	NA	NA	NA	NA	NA
NUP133	DUSP12	NA	NA	PHF2	NA	NA	NA	NA	NA	NA	NA	NA	NA	NA
NUP205	DUSP18	NA	NA	PHF3	NA	NA	NA	NA	NA	NA	NA	NA	NA	NA
NUP214	DUT	NA	NA	PHF5A	NA	NA	NA	NA	NA	NA	NA	NA	NA	NA
NUP35	DVL2	NA	NA	PHF7	NA	NA	NA	NA	NA	NA	NA	NA	NA	NA
NUP85	DYNC2H1	NA	NA	PHIP	NA	NA	NA	NA	NA	NA	NA	NA	NA	NA
NUP88	DYRK1A	NA	NA	PIGX	NA	NA	NA	NA	NA	NA	NA	NA	NA	NA
NUP93	DZIP3	NA	NA	PINX1	NA	NA	NA	NA	NA	NA	NA	NA	NA	NA
NUSAP1	E2F1	NA	NA	PKDCC	NA	NA	NA	NA	NA	NA	NA	NA	NA	NA
NXT2	E2F3	NA	NA	PKMYT1	NA	NA	NA	NA	NA	NA	NA	NA	NA	NA
OAS3	E2F4	NA	NA	PKN3	NA	NA	NA	NA	NA	NA	NA	NA	NA	NA
ODC1	E2F5	NA	NA	PLCB1	NA	NA	NA	NA	NA	NA	NA	NA	NA	NA
OIP5	E2F6	NA	NA	PLEKHG4B	NA	NA	NA	NA	NA	NA	NA	NA	NA	NA
OLFML2B	E2F8	NA	NA	PLK1	NA	NA	NA	NA	NA	NA	NA	NA	NA	NA
ORC1	EARS2	NA	NA	PLK4	NA	NA	NA	NA	NA	NA	NA	NA	NA	NA
OSGEPL1	EBAG9	NA	NA	PLSCR1	NA	NA	NA	NA	NA	NA	NA	NA	NA	NA
OXNAD1	EBNA1BP2	NA	NA	POC1A	NA	NA	NA	NA	NA	NA	NA	NA	NA	NA
PA2G4	EBP	NA	NA	POGZ	NA	NA	NA	NA	NA	NA	NA	NA	NA	NA
PAFAH1B3	ECD	NA	NA	POLA1	NA	NA	NA	NA	NA	NA	NA	NA	NA	NA
PAICS	ECHDC3	NA	NA	POLA2	NA	NA	NA	NA	NA	NA	NA	NA	NA	NA
PAK3	ECSIT	NA	NA	POLD1	NA	NA	NA	NA	NA	NA	NA	NA	NA	NA
PARP1	ECT2	NA	NA	POLD2	NA	NA	NA	NA	NA	NA	NA	NA	NA	NA
PASK	EDC3	NA	NA	POLD3	NA	NA	NA	NA	NA	NA	NA	NA	NA	NA
PATZ1	EEF1A1	NA	NA	POLE	NA	NA	NA	NA	NA	NA	NA	NA	NA	NA
PAXIP1	EEF1D	NA	NA	POLE2	NA	NA	NA	NA	NA	NA	NA	NA	NA	NA
PBK	EEFSEC	NA	NA	POLR1A	NA	NA	NA	NA	NA	NA	NA	NA	NA	NA
PCDH10	EEPD1	NA	NA	POLR1B	NA	NA	NA	NA	NA	NA	NA	NA	NA	NA
PCIF1	EFCAB2	NA	NA	POP7	NA	NA	NA	NA	NA	NA	NA	NA	NA	NA
PCNT	EFCAB7	NA	NA	PPIH	NA	NA	NA	NA	NA	NA	NA	NA	NA	NA
PDE3B	EFHD2	NA	NA	PPIL1	NA	NA	NA	NA	NA	NA	NA	NA	NA	NA
PDGFRA	EFNA4	NA	NA	PPP2R5D	NA	NA	NA	NA	NA	NA	NA	NA	NA	NA
PDK3	EFS	NA	NA	PRC1	NA	NA	NA	NA	NA	NA	NA	NA	NA	NA
PEG10	EFTUD2	NA	NA	PRDM6	NA	NA	NA	NA	NA	NA	NA	NA	NA	NA
PELI2	EGR1	NA	NA	PRIM1	NA	NA	NA	NA	NA	NA	NA	NA	NA	NA
PFAS	EGR3	NA	NA	PRKAR2B	NA	NA	NA	NA	NA	NA	NA	NA	NA	NA
PFDN4	EHMT1	NA	NA	PRKDC	NA	NA	NA	NA	NA	NA	NA	NA	NA	NA
PGAM5	EHMT2	NA	NA	PRMT1	NA	NA	NA	NA	NA	NA	NA	NA	NA	NA
PGD	EIF1AD	NA	NA	PRMT3	NA	NA	NA	NA	NA	NA	NA	NA	NA	NA
PHB2	EIF2A	NA	NA	PRPF19	NA	NA	NA	NA	NA	NA	NA	NA	NA	NA
PHC1	EIF2B1	NA	NA	PRPF4	NA	NA	NA	NA	NA	NA	NA	NA	NA	NA
PHF14	EIF2B2	NA	NA	PRPF8	NA	NA	NA	NA	NA	NA	NA	NA	NA	NA
PHF19	EIF2B5	NA	NA	PRPS2	NA	NA	NA	NA	NA	NA	NA	NA	NA	NA
PHF2	EIF3D	NA	NA	PRR3	NA	NA	NA	NA	NA	NA	NA	NA	NA	NA
PHF3	EIF3E	NA	NA	PRTFDC1	NA	NA	NA	NA	NA	NA	NA	NA	NA	NA
PHF5A	EIF3L	NA	NA	PSD3	NA	NA	NA	NA	NA	NA	NA	NA	NA	NA
PHF7	EIF4B	NA	NA	PSIP1	NA	NA	NA	NA	NA	NA	NA	NA	NA	NA
PHIP	EIF4EBP1	NA	NA	PSRC1	NA	NA	NA	NA	NA	NA	NA	NA	NA	NA
PID1	EIF5	NA	NA	PTBP1	NA	NA	NA	NA	NA	NA	NA	NA	NA	NA
PIGX	ELAVL1	NA	NA	PTBP2	NA	NA	NA	NA	NA	NA	NA	NA	NA	NA
PINX1	ELF2	NA	NA	PTCH2	NA	NA	NA	NA	NA	NA	NA	NA	NA	NA
PITX2	ELF4	NA	NA	PTGER2	NA	NA	NA	NA	NA	NA	NA	NA	NA	NA
PIWIL2	ELOVL2	NA	NA	PTMA	NA	NA	NA	NA	NA	NA	NA	NA	NA	NA
PKDCC	ELOVL5	NA	NA	PTN	NA	NA	NA	NA	NA	NA	NA	NA	NA	NA
PKMYT1	ELP3	NA	NA	PTPN18	NA	NA	NA	NA	NA	NA	NA	NA	NA	NA
PKN3	ELP4	NA	NA	PTPRN	NA	NA	NA	NA	NA	NA	NA	NA	NA	NA
PKNOX2	EMD	NA	NA	PXMP4	NA	NA	NA	NA	NA	NA	NA	NA	NA	NA
PLCB1	EME1	NA	NA	PYGO1	NA	NA	NA	NA	NA	NA	NA	NA	NA	NA
PLEKHG4B	EMG1	NA	NA	PYGO2	NA	NA	NA	NA	NA	NA	NA	NA	NA	NA
PLK1	EML1	NA	NA	QRSL1	NA	NA	NA	NA	NA	NA	NA	NA	NA	NA
PLK4	EML4	NA	NA	QSER1	NA	NA	NA	NA	NA	NA	NA	NA	NA	NA
PLSCR1	EML5	NA	NA	R3HDM1	NA	NA	NA	NA	NA	NA	NA	NA	NA	NA
POC1A	EMP2	NA	NA	RACGAP1	NA	NA	NA	NA	NA	NA	NA	NA	NA	NA
POGZ	ENOPH1	NA	NA	RAD51	NA	NA	NA	NA	NA	NA	NA	NA	NA	NA
POLA1	ENOSF1	NA	NA	RAD51AP1	NA	NA	NA	NA	NA	NA	NA	NA	NA	NA
POLA2	ENOX2	NA	NA	RAD51C	NA	NA	NA	NA	NA	NA	NA	NA	NA	NA
POLD1	ENPP1	NA	NA	RAD54L	NA	NA	NA	NA	NA	NA	NA	NA	NA	NA
POLD2	ENPP2	NA	NA	RAE1	NA	NA	NA	NA	NA	NA	NA	NA	NA	NA
POLD3	ENSA	NA	NA	RALGPS2	NA	NA	NA	NA	NA	NA	NA	NA	NA	NA
POLE	ENTPD6	NA	NA	RANBP1	NA	NA	NA	NA	NA	NA	NA	NA	NA	NA
POLE2	ENY2	NA	NA	RBBP4	NA	NA	NA	NA	NA	NA	NA	NA	NA	NA
POLR1A	EP300	NA	NA	RBBP7	NA	NA	NA	NA	NA	NA	NA	NA	NA	NA
POLR1B	EP400	NA	NA	RBBP8	NA	NA	NA	NA	NA	NA	NA	NA	NA	NA
POP7	EPB41	NA	NA	RBM14	NA	NA	NA	NA	NA	NA	NA	NA	NA	NA
PPIH	EPHB4	NA	NA	RBM23	NA	NA	NA	NA	NA	NA	NA	NA	NA	NA
PPIL1	EPS8	NA	NA	RBM26	NA	NA	NA	NA	NA	NA	NA	NA	NA	NA
PPP2R5D	ERAL1	NA	NA	RCL1	NA	NA	NA	NA	NA	NA	NA	NA	NA	NA
PRC1	ERAP1	NA	NA	RECQL4	NA	NA	NA	NA	NA	NA	NA	NA	NA	NA
PRDM6	ERCC3	NA	NA	REEP4	NA	NA	NA	NA	NA	NA	NA	NA	NA	NA
PRIM1	ERCC4	NA	NA	RELN	NA	NA	NA	NA	NA	NA	NA	NA	NA	NA
PRKAR2B	ERCC6L	NA	NA	RFC2	NA	NA	NA	NA	NA	NA	NA	NA	NA	NA
PRKDC	ERCC8	NA	NA	RFC3	NA	NA	NA	NA	NA	NA	NA	NA	NA	NA
PRMT1	ERH	NA	NA	RFC4	NA	NA	NA	NA	NA	NA	NA	NA	NA	NA
PRMT3	ERI1	NA	NA	RFC5	NA	NA	NA	NA	NA	NA	NA	NA	NA	NA
PRPF19	ERI2	NA	NA	RFT1	NA	NA	NA	NA	NA	NA	NA	NA	NA	NA
PRPF4	ERI3	NA	NA	RFWD3	NA	NA	NA	NA	NA	NA	NA	NA	NA	NA
PRPF8	ERLIN1	NA	NA	RGS17	NA	NA	NA	NA	NA	NA	NA	NA	NA	NA
PRPS2	ESCO2	NA	NA	RIBC2	NA	NA	NA	NA	NA	NA	NA	NA	NA	NA
PRR3	ESF1	NA	NA	RIN1	NA	NA	NA	NA	NA	NA	NA	NA	NA	NA
PRTFDC1	ESPL1	NA	NA	RMI1	NA	NA	NA	NA	NA	NA	NA	NA	NA	NA
PRUNE2	ETAA1	NA	NA	RNASEH2A	NA	NA	NA	NA	NA	NA	NA	NA	NA	NA
PSD3	ETS2	NA	NA	RNASEH2B	NA	NA	NA	NA	NA	NA	NA	NA	NA	NA
PSIP1	EVI2B	NA	NA	RNF214	NA	NA	NA	NA	NA	NA	NA	NA	NA	NA
PSRC1	EWSR1	NA	NA	RNF26	NA	NA	NA	NA	NA	NA	NA	NA	NA	NA
PTBP1	EXO1	NA	NA	RNFT2	NA	NA	NA	NA	NA	NA	NA	NA	NA	NA
PTBP2	EXOG	NA	NA	ROR2	NA	NA	NA	NA	NA	NA	NA	NA	NA	NA
PTCH2	EXOSC10	NA	NA	RPA2	NA	NA	NA	NA	NA	NA	NA	NA	NA	NA
PTGER2	EXOSC2	NA	NA	RPA3	NA	NA	NA	NA	NA	NA	NA	NA	NA	NA
PTGFRN	EXOSC3	NA	NA	RPL39L	NA	NA	NA	NA	NA	NA	NA	NA	NA	NA
PTMA	EXOSC5	NA	NA	RPP25	NA	NA	NA	NA	NA	NA	NA	NA	NA	NA
PTN	EXOSC8	NA	NA	RPP30	NA	NA	NA	NA	NA	NA	NA	NA	NA	NA
PTPN18	EXOSC9	NA	NA	RPS6KA5	NA	NA	NA	NA	NA	NA	NA	NA	NA	NA
PTPN3	EYA2	NA	NA	RPUSD4	NA	NA	NA	NA	NA	NA	NA	NA	NA	NA
PTPRN	EYA3	NA	NA	RRM1	NA	NA	NA	NA	NA	NA	NA	NA	NA	NA
PXMP4	EYA4	NA	NA	RRP1B	NA	NA	NA	NA	NA	NA	NA	NA	NA	NA
PYGO1	EZH2	NA	NA	RRP7A	NA	NA	NA	NA	NA	NA	NA	NA	NA	NA
PYGO2	FAF1	NA	NA	RTKN2	NA	NA	NA	NA	NA	NA	NA	NA	NA	NA
QRSL1	FAIM	NA	NA	RTN4IP1	NA	NA	NA	NA	NA	NA	NA	NA	NA	NA
QSER1	FAIM2	NA	NA	RTTN	NA	NA	NA	NA	NA	NA	NA	NA	NA	NA
R3HDM1	FAM102B	NA	NA	RUVBL1	NA	NA	NA	NA	NA	NA	NA	NA	NA	NA
RAB42	FAM104B	NA	NA	SAFB	NA	NA	NA	NA	NA	NA	NA	NA	NA	NA
RACGAP1	FAM110A	NA	NA	SARS2	NA	NA	NA	NA	NA	NA	NA	NA	NA	NA
RAD51	FAM110B	NA	NA	SART3	NA	NA	NA	NA	NA	NA	NA	NA	NA	NA
RAD51AP1	FAM111A	NA	NA	SCARA3	NA	NA	NA	NA	NA	NA	NA	NA	NA	NA
RAD51C	FAM111B	NA	NA	SEMA4C	NA	NA	NA	NA	NA	NA	NA	NA	NA	NA
RAD54L	FAM120C	NA	NA	SENP1	NA	NA	NA	NA	NA	NA	NA	NA	NA	NA
RAE1	FAM122B	NA	NA	SEPHS1	NA	NA	NA	NA	NA	NA	NA	NA	NA	NA
RALGPS2	FAM129A	NA	NA	SETD1A	NA	NA	NA	NA	NA	NA	NA	NA	NA	NA
RANBP1	FAM13A	NA	NA	SETMAR	NA	NA	NA	NA	NA	NA	NA	NA	NA	NA
RARB	FAM161A	NA	NA	SF1	NA	NA	NA	NA	NA	NA	NA	NA	NA	NA
RAVER2	FAM162B	NA	NA	SF3A1	NA	NA	NA	NA	NA	NA	NA	NA	NA	NA
RBBP4	FAM173B	NA	NA	SF3A2	NA	NA	NA	NA	NA	NA	NA	NA	NA	NA
RBBP7	FAM180A	NA	NA	SF3A3	NA	NA	NA	NA	NA	NA	NA	NA	NA	NA
RBBP8	FAM192A	NA	NA	SF3B3	NA	NA	NA	NA	NA	NA	NA	NA	NA	NA
RBM14	FAM49A	NA	NA	SFMBT2	NA	NA	NA	NA	NA	NA	NA	NA	NA	NA
RBM23	FAM53B	NA	NA	SFPQ	NA	NA	NA	NA	NA	NA	NA	NA	NA	NA
RBM26	FAM76A	NA	NA	SFSWAP	NA	NA	NA	NA	NA	NA	NA	NA	NA	NA
RCL1	FAM76B	NA	NA	SFXN2	NA	NA	NA	NA	NA	NA	NA	NA	NA	NA
REC8	FAM83B	NA	NA	SHCBP1	NA	NA	NA	NA	NA	NA	NA	NA	NA	NA
RECQL4	FAM83D	NA	NA	SHMT1	NA	NA	NA	NA	NA	NA	NA	NA	NA	NA
REEP4	FAM98B	NA	NA	SIN3A	NA	NA	NA	NA	NA	NA	NA	NA	NA	NA
RELN	FAN1	NA	NA	SIPA1L2	NA	NA	NA	NA	NA	NA	NA	NA	NA	NA
RFC2	FANCA	NA	NA	SIVA1	NA	NA	NA	NA	NA	NA	NA	NA	NA	NA
RFC3	FANCB	NA	NA	SKA2	NA	NA	NA	NA	NA	NA	NA	NA	NA	NA
RFC4	FANCC	NA	NA	SKA3	NA	NA	NA	NA	NA	NA	NA	NA	NA	NA
RFC5	FANCD2	NA	NA	SLC12A7	NA	NA	NA	NA	NA	NA	NA	NA	NA	NA
RFT1	FANCE	NA	NA	SLC19A1	NA	NA	NA	NA	NA	NA	NA	NA	NA	NA
RFWD3	FANCF	NA	NA	SLC25A10	NA	NA	NA	NA	NA	NA	NA	NA	NA	NA
RGS17	FANCG	NA	NA	SLC25A13	NA	NA	NA	NA	NA	NA	NA	NA	NA	NA
RIBC2	FANCI	NA	NA	SLC25A40	NA	NA	NA	NA	NA	NA	NA	NA	NA	NA
RIMKLB	FANCL	NA	NA	SLC25A5	NA	NA	NA	NA	NA	NA	NA	NA	NA	NA
RIN1	FARS2	NA	NA	SLC29A1	NA	NA	NA	NA	NA	NA	NA	NA	NA	NA
RMI1	FASN	NA	NA	SLC37A4	NA	NA	NA	NA	NA	NA	NA	NA	NA	NA
RNASE2	FASTKD1	NA	NA	SLC4A8	NA	NA	NA	NA	NA	NA	NA	NA	NA	NA
RNASEH2A	FASTKD2	NA	NA	SLC5A6	NA	NA	NA	NA	NA	NA	NA	NA	NA	NA
RNASEH2B	FASTKD3	NA	NA	SLC7A11	NA	NA	NA	NA	NA	NA	NA	NA	NA	NA
RNF214	FAT3	NA	NA	SLC9A9	NA	NA	NA	NA	NA	NA	NA	NA	NA	NA
RNF26	FBL	NA	NA	SLFN11	NA	NA	NA	NA	NA	NA	NA	NA	NA	NA
RNFT2	FBLN1	NA	NA	SLFN13	NA	NA	NA	NA	NA	NA	NA	NA	NA	NA
ROR2	FBXO4	NA	NA	SMAD1	NA	NA	NA	NA	NA	NA	NA	NA	NA	NA
RPA2	FBXO43	NA	NA	SMAD6	NA	NA	NA	NA	NA	NA	NA	NA	NA	NA
RPA3	FBXO5	NA	NA	SMAP2	NA	NA	NA	NA	NA	NA	NA	NA	NA	NA
RPL39L	FCF1	NA	NA	SMARCA4	NA	NA	NA	NA	NA	NA	NA	NA	NA	NA
RPP25	FDXACB1	NA	NA	SMARCC1	NA	NA	NA	NA	NA	NA	NA	NA	NA	NA
RPP30	FEN1	NA	NA	SMARCD1	NA	NA	NA	NA	NA	NA	NA	NA	NA	NA
RPS6KA5	FERMT1	NA	NA	SMC1A	NA	NA	NA	NA	NA	NA	NA	NA	NA	NA
RPUSD4	FES	NA	NA	SMC2	NA	NA	NA	NA	NA	NA	NA	NA	NA	NA
RRM1	FGD1	NA	NA	SMC4	NA	NA	NA	NA	NA	NA	NA	NA	NA	NA
RRP1B	FGF7	NA	NA	SMPD4	NA	NA	NA	NA	NA	NA	NA	NA	NA	NA
RRP7A	FGFR1OP	NA	NA	SMYD5	NA	NA	NA	NA	NA	NA	NA	NA	NA	NA
RTKN2	FH	NA	NA	SNAI1	NA	NA	NA	NA	NA	NA	NA	NA	NA	NA
RTN4IP1	FHL3	NA	NA	SNORA74A	NA	NA	NA	NA	NA	NA	NA	NA	NA	NA
RTTN	FHOD1	NA	NA	SNRNP200	NA	NA	NA	NA	NA	NA	NA	NA	NA	NA
RUVBL1	FIGN	NA	NA	SNRNP40	NA	NA	NA	NA	NA	NA	NA	NA	NA	NA
SAFB	FIGNL1	NA	NA	SNRPA	NA	NA	NA	NA	NA	NA	NA	NA	NA	NA
SAP30	FIP1L1	NA	NA	SNRPC	NA	NA	NA	NA	NA	NA	NA	NA	NA	NA
SARS2	FJX1	NA	NA	SNRPD1	NA	NA	NA	NA	NA	NA	NA	NA	NA	NA
SART3	FKBP4	NA	NA	SNRPF	NA	NA	NA	NA	NA	NA	NA	NA	NA	NA
SCARA3	FLOT1	NA	NA	SORD	NA	NA	NA	NA	NA	NA	NA	NA	NA	NA
SEMA4C	FLVCR1	NA	NA	SORL1	NA	NA	NA	NA	NA	NA	NA	NA	NA	NA
SENP1	FMR1	NA	NA	SOX11	NA	NA	NA	NA	NA	NA	NA	NA	NA	NA
SEPHS1	FN3KRP	NA	NA	SP2	NA	NA	NA	NA	NA	NA	NA	NA	NA	NA
SESN3	FNDC3A	NA	NA	SP4	NA	NA	NA	NA	NA	NA	NA	NA	NA	NA
SETD1A	FOSL1	NA	NA	SPA17	NA	NA	NA	NA	NA	NA	NA	NA	NA	NA
SETMAR	FOXF1	NA	NA	SPAG5	NA	NA	NA	NA	NA	NA	NA	NA	NA	NA
SF1	FOXM1	NA	NA	SPATA5	NA	NA	NA	NA	NA	NA	NA	NA	NA	NA
SF3A1	FOXP2	NA	NA	SPATA6	NA	NA	NA	NA	NA	NA	NA	NA	NA	NA
SF3A2	FOXRED1	NA	NA	SPC24	NA	NA	NA	NA	NA	NA	NA	NA	NA	NA
SF3A3	FOXRED2	NA	NA	SPC25	NA	NA	NA	NA	NA	NA	NA	NA	NA	NA
SF3B3	FRRS1	NA	NA	SPEN	NA	NA	NA	NA	NA	NA	NA	NA	NA	NA
SFMBT2	FRYL	NA	NA	SPIN4	NA	NA	NA	NA	NA	NA	NA	NA	NA	NA
SFPQ	FRZB	NA	NA	SPTLC3	NA	NA	NA	NA	NA	NA	NA	NA	NA	NA
SFSWAP	FSD1	NA	NA	SRBD1	NA	NA	NA	NA	NA	NA	NA	NA	NA	NA
SFXN2	FST	NA	NA	SRGAP1	NA	NA	NA	NA	NA	NA	NA	NA	NA	NA
SHCBP1	FTSJ3	NA	NA	SRRT	NA	NA	NA	NA	NA	NA	NA	NA	NA	NA
SHMT1	FUBP1	NA	NA	SRSF1	NA	NA	NA	NA	NA	NA	NA	NA	NA	NA
SIN3A	FUS	NA	NA	SRSF2	NA	NA	NA	NA	NA	NA	NA	NA	NA	NA
SIPA1L2	FUT8	NA	NA	SRSF7	NA	NA	NA	NA	NA	NA	NA	NA	NA	NA
SIVA1	FUZ	NA	NA	SSBP4	NA	NA	NA	NA	NA	NA	NA	NA	NA	NA
SKA2	FZD7	NA	NA	SSRP1	NA	NA	NA	NA	NA	NA	NA	NA	NA	NA
SKA3	G2E3	NA	NA	ST6GALNAC3	NA	NA	NA	NA	NA	NA	NA	NA	NA	NA
SLC12A7	G3BP1	NA	NA	STEAP2	NA	NA	NA	NA	NA	NA	NA	NA	NA	NA
SLC19A1	G6PD	NA	NA	STIL	NA	NA	NA	NA	NA	NA	NA	NA	NA	NA
SLC25A10	GABPA	NA	NA	STK33	NA	NA	NA	NA	NA	NA	NA	NA	NA	NA
SLC25A13	GABPB1	NA	NA	STOML2	NA	NA	NA	NA	NA	NA	NA	NA	NA	NA
SLC25A40	GABRA5	NA	NA	SUV39H1	NA	NA	NA	NA	NA	NA	NA	NA	NA	NA
SLC25A5	GABRB1	NA	NA	SUV39H2	NA	NA	NA	NA	NA	NA	NA	NA	NA	NA
SLC29A1	GABRE	NA	NA	SYNE2	NA	NA	NA	NA	NA	NA	NA	NA	NA	NA
SLC37A4	GAL3ST4	NA	NA	SYTL2	NA	NA	NA	NA	NA	NA	NA	NA	NA	NA
SLC4A8	GALK2	NA	NA	TACC3	NA	NA	NA	NA	NA	NA	NA	NA	NA	NA
SLC5A6	GALM	NA	NA	TADA1	NA	NA	NA	NA	NA	NA	NA	NA	NA	NA
SLC7A11	GALNT12	NA	NA	TADA2A	NA	NA	NA	NA	NA	NA	NA	NA	NA	NA
SLC9A9	GART	NA	NA	TAF1A	NA	NA	NA	NA	NA	NA	NA	NA	NA	NA
SLCO2A1	GAS2L3	NA	NA	TAF9B	NA	NA	NA	NA	NA	NA	NA	NA	NA	NA
SLFN11	GATA2	NA	NA	TBL1XR1	NA	NA	NA	NA	NA	NA	NA	NA	NA	NA
SLFN13	GATAD2A	NA	NA	TBRG4	NA	NA	NA	NA	NA	NA	NA	NA	NA	NA
SMAD1	GBGT1	NA	NA	TBX4	NA	NA	NA	NA	NA	NA	NA	NA	NA	NA
SMAD6	GCNT1	NA	NA	TCERG1	NA	NA	NA	NA	NA	NA	NA	NA	NA	NA
SMAP2	GDAP1	NA	NA	TCF12	NA	NA	NA	NA	NA	NA	NA	NA	NA	NA
SMARCA4	GDF5	NA	NA	TCF19	NA	NA	NA	NA	NA	NA	NA	NA	NA	NA
SMARCC1	GEM	NA	NA	TCF7L2	NA	NA	NA	NA	NA	NA	NA	NA	NA	NA
SMARCD1	GEMIN4	NA	NA	TCOF1	NA	NA	NA	NA	NA	NA	NA	NA	NA	NA
SMC1A	GEMIN5	NA	NA	TDP1	NA	NA	NA	NA	NA	NA	NA	NA	NA	NA
SMC2	GEMIN6	NA	NA	TEAD2	NA	NA	NA	NA	NA	NA	NA	NA	NA	NA
SMC4	GEN1	NA	NA	TFAM	NA	NA	NA	NA	NA	NA	NA	NA	NA	NA
SMPD4	GFPT2	NA	NA	TFAP4	NA	NA	NA	NA	NA	NA	NA	NA	NA	NA
SMYD5	GGA2	NA	NA	THADA	NA	NA	NA	NA	NA	NA	NA	NA	NA	NA
SNAI1	GGH	NA	NA	THAP10	NA	NA	NA	NA	NA	NA	NA	NA	NA	NA
SNAP25	GIN1	NA	NA	THNSL1	NA	NA	NA	NA	NA	NA	NA	NA	NA	NA
SNORA70B	GINS1	NA	NA	THOC1	NA	NA	NA	NA	NA	NA	NA	NA	NA	NA
SNORA74A	GINS2	NA	NA	THOC6	NA	NA	NA	NA	NA	NA	NA	NA	NA	NA
SNRNP200	GINS3	NA	NA	TIMELESS	NA	NA	NA	NA	NA	NA	NA	NA	NA	NA
SNRNP40	GINS4	NA	NA	TIMM10	NA	NA	NA	NA	NA	NA	NA	NA	NA	NA
SNRPA	GJC1	NA	NA	TIPIN	NA	NA	NA	NA	NA	NA	NA	NA	NA	NA
SNRPC	GLB1L	NA	NA	TK1	NA	NA	NA	NA	NA	NA	NA	NA	NA	NA
SNRPD1	GLE1	NA	NA	TKT	NA	NA	NA	NA	NA	NA	NA	NA	NA	NA
SNRPF	GLI3	NA	NA	TLE1	NA	NA	NA	NA	NA	NA	NA	NA	NA	NA
SORD	GLMN	NA	NA	TLE3	NA	NA	NA	NA	NA	NA	NA	NA	NA	NA
SORL1	GLO1	NA	NA	TMED8	NA	NA	NA	NA	NA	NA	NA	NA	NA	NA
SOX11	GLOD4	NA	NA	TMEM106C	NA	NA	NA	NA	NA	NA	NA	NA	NA	NA
SP2	GLUL	NA	NA	TMEM155	NA	NA	NA	NA	NA	NA	NA	NA	NA	NA
SP4	GLYR1	NA	NA	TMEM18	NA	NA	NA	NA	NA	NA	NA	NA	NA	NA
SPA17	GMEB1	NA	NA	TMEM201	NA	NA	NA	NA	NA	NA	NA	NA	NA	NA
SPAG5	GMNN	NA	NA	TMEM209	NA	NA	NA	NA	NA	NA	NA	NA	NA	NA
SPATA5	GMPPB	NA	NA	TMEM39B	NA	NA	NA	NA	NA	NA	NA	NA	NA	NA
SPATA6	GMPS	NA	NA	TMEM97	NA	NA	NA	NA	NA	NA	NA	NA	NA	NA
SPC24	GNB3	NA	NA	TMPO	NA	NA	NA	NA	NA	NA	NA	NA	NA	NA
SPC25	GNE	NA	NA	TMTC4	NA	NA	NA	NA	NA	NA	NA	NA	NA	NA
SPEN	GNG2	NA	NA	TNRC6A	NA	NA	NA	NA	NA	NA	NA	NA	NA	NA
SPIN4	GNL3	NA	NA	TOE1	NA	NA	NA	NA	NA	NA	NA	NA	NA	NA
SPTLC3	GNL3L	NA	NA	TOMM22	NA	NA	NA	NA	NA	NA	NA	NA	NA	NA
SRBD1	GNPDA1	NA	NA	TOP1	NA	NA	NA	NA	NA	NA	NA	NA	NA	NA
SRGAP1	GNPNAT1	NA	NA	TOP3A	NA	NA	NA	NA	NA	NA	NA	NA	NA	NA
SRRT	GOLM1	NA	NA	TOX	NA	NA	NA	NA	NA	NA	NA	NA	NA	NA
SRSF1	GOT2	NA	NA	TRAIP	NA	NA	NA	NA	NA	NA	NA	NA	NA	NA
SRSF2	GPAM	NA	NA	TRAP1	NA	NA	NA	NA	NA	NA	NA	NA	NA	NA
SRSF7	GPATCH1	NA	NA	TRIM14	NA	NA	NA	NA	NA	NA	NA	NA	NA	NA
SSBP4	GPATCH4	NA	NA	TRIM28	NA	NA	NA	NA	NA	NA	NA	NA	NA	NA
SSRP1	GPBP1	NA	NA	TRIP13	NA	NA	NA	NA	NA	NA	NA	NA	NA	NA
ST6GALNAC3	GPC5	NA	NA	TRMT5	NA	NA	NA	NA	NA	NA	NA	NA	NA	NA
STAC	GPC6	NA	NA	TROAP	NA	NA	NA	NA	NA	NA	NA	NA	NA	NA
STEAP2	GPD2	NA	NA	TRPC5	NA	NA	NA	NA	NA	NA	NA	NA	NA	NA
STIL	GPHN	NA	NA	TSEN2	NA	NA	NA	NA	NA	NA	NA	NA	NA	NA
STK33	GPM6B	NA	NA	TSHZ1	NA	NA	NA	NA	NA	NA	NA	NA	NA	NA
STOML2	GPR137C	NA	NA	TSPYL5	NA	NA	NA	NA	NA	NA	NA	NA	NA	NA
SUV39H1	GPR39	NA	NA	TTC30B	NA	NA	NA	NA	NA	NA	NA	NA	NA	NA
SUV39H2	GPR85	NA	NA	TTF2	NA	NA	NA	NA	NA	NA	NA	NA	NA	NA
SYBU	GPR87	NA	NA	TTI1	NA	NA	NA	NA	NA	NA	NA	NA	NA	NA
SYNE2	GPSM2	NA	NA	TTLL12	NA	NA	NA	NA	NA	NA	NA	NA	NA	NA
SYTL2	GPX7	NA	NA	TTLL4	NA	NA	NA	NA	NA	NA	NA	NA	NA	NA
TACC3	GREM2	NA	NA	TUBD1	NA	NA	NA	NA	NA	NA	NA	NA	NA	NA
TADA1	GRK6	NA	NA	TUBGCP3	NA	NA	NA	NA	NA	NA	NA	NA	NA	NA
TADA2A	GRPEL2	NA	NA	TUBGCP4	NA	NA	NA	NA	NA	NA	NA	NA	NA	NA
TAF1A	GRPR	NA	NA	TXLNG	NA	NA	NA	NA	NA	NA	NA	NA	NA	NA
TAF9B	GRWD1	NA	NA	TXNDC16	NA	NA	NA	NA	NA	NA	NA	NA	NA	NA
TBL1XR1	GSR	NA	NA	TXNRD1	NA	NA	NA	NA	NA	NA	NA	NA	NA	NA
TBRG4	GSTCD	NA	NA	TYMS	NA	NA	NA	NA	NA	NA	NA	NA	NA	NA
TBX4	GSTM5	NA	NA	UBA2	NA	NA	NA	NA	NA	NA	NA	NA	NA	NA
TCERG1	GTF2E1	NA	NA	UBE2C	NA	NA	NA	NA	NA	NA	NA	NA	NA	NA
TCF12	GTF2E2	NA	NA	UBE2S	NA	NA	NA	NA	NA	NA	NA	NA	NA	NA
TCF19	GTF2F2	NA	NA	UBE2T	NA	NA	NA	NA	NA	NA	NA	NA	NA	NA
TCF7L2	GTF2H3	NA	NA	UBTF	NA	NA	NA	NA	NA	NA	NA	NA	NA	NA
TCOF1	GTF2H4	NA	NA	UCK1	NA	NA	NA	NA	NA	NA	NA	NA	NA	NA
TDP1	GTF2I	NA	NA	UHRF1	NA	NA	NA	NA	NA	NA	NA	NA	NA	NA
TEAD2	GTF2IRD1	NA	NA	ULBP3	NA	NA	NA	NA	NA	NA	NA	NA	NA	NA
TFAM	GTF3A	NA	NA	UMPS	NA	NA	NA	NA	NA	NA	NA	NA	NA	NA
TFAP4	GTF3C2	NA	NA	UNC5C	NA	NA	NA	NA	NA	NA	NA	NA	NA	NA
THADA	GTF3C3	NA	NA	UNG	NA	NA	NA	NA	NA	NA	NA	NA	NA	NA
THAP10	GTF3C4	NA	NA	UNK	NA	NA	NA	NA	NA	NA	NA	NA	NA	NA
THNSL1	GTF3C5	NA	NA	UPF1	NA	NA	NA	NA	NA	NA	NA	NA	NA	NA
THOC1	GTSE1	NA	NA	UPF3B	NA	NA	NA	NA	NA	NA	NA	NA	NA	NA
THOC6	GUF1	NA	NA	URB2	NA	NA	NA	NA	NA	NA	NA	NA	NA	NA
TIMELESS	GUSB	NA	NA	USP21	NA	NA	NA	NA	NA	NA	NA	NA	NA	NA
TIMM10	H1F0	NA	NA	USP28	NA	NA	NA	NA	NA	NA	NA	NA	NA	NA
TIPIN	H1FX	NA	NA	USP3	NA	NA	NA	NA	NA	NA	NA	NA	NA	NA
TK1	H2AFV	NA	NA	USP39	NA	NA	NA	NA	NA	NA	NA	NA	NA	NA
TKT	H2AFX	NA	NA	USP54	NA	NA	NA	NA	NA	NA	NA	NA	NA	NA
TLE1	H2AFY2	NA	NA	VAC14	NA	NA	NA	NA	NA	NA	NA	NA	NA	NA
TLE3	H2AFZ	NA	NA	VAT1L	NA	NA	NA	NA	NA	NA	NA	NA	NA	NA
TMED8	H3F3B	NA	NA	VPS52	NA	NA	NA	NA	NA	NA	NA	NA	NA	NA
TMEM106C	HADH	NA	NA	VSIG10	NA	NA	NA	NA	NA	NA	NA	NA	NA	NA
TMEM155	HAT1	NA	NA	VSNL1	NA	NA	NA	NA	NA	NA	NA	NA	NA	NA
TMEM18	HAUS1	NA	NA	WDHD1	NA	NA	NA	NA	NA	NA	NA	NA	NA	NA
TMEM201	HAUS2	NA	NA	WDR17	NA	NA	NA	NA	NA	NA	NA	NA	NA	NA
TMEM209	HAUS4	NA	NA	WDR34	NA	NA	NA	NA	NA	NA	NA	NA	NA	NA
TMEM39B	HAUS5	NA	NA	WDR35	NA	NA	NA	NA	NA	NA	NA	NA	NA	NA
TMEM97	HAUS6	NA	NA	WDR5	NA	NA	NA	NA	NA	NA	NA	NA	NA	NA
TMPO	HAUS8	NA	NA	WDR76	NA	NA	NA	NA	NA	NA	NA	NA	NA	NA
TMTC2	HAX1	NA	NA	WEE1	NA	NA	NA	NA	NA	NA	NA	NA	NA	NA
TMTC4	HCFC1	NA	NA	WNK3	NA	NA	NA	NA	NA	NA	NA	NA	NA	NA
TNRC6A	HCFC1R1	NA	NA	WRAP53	NA	NA	NA	NA	NA	NA	NA	NA	NA	NA
TOE1	HDAC1	NA	NA	WWC1	NA	NA	NA	NA	NA	NA	NA	NA	NA	NA
TOMM22	HDAC2	NA	NA	XKR5	NA	NA	NA	NA	NA	NA	NA	NA	NA	NA
TOP1	HDGF	NA	NA	XRCC1	NA	NA	NA	NA	NA	NA	NA	NA	NA	NA
TOP3A	HDHD3	NA	NA	XRCC2	NA	NA	NA	NA	NA	NA	NA	NA	NA	NA
TOX	HDX	NA	NA	XRCC3	NA	NA	NA	NA	NA	NA	NA	NA	NA	NA
TRAIP	HEATR1	NA	NA	YEATS4	NA	NA	NA	NA	NA	NA	NA	NA	NA	NA
TRAP1	HEATR3	NA	NA	ZBTB44	NA	NA	NA	NA	NA	NA	NA	NA	NA	NA
TRIM14	HEATR6	NA	NA	ZBTB9	NA	NA	NA	NA	NA	NA	NA	NA	NA	NA
TRIM28	HELB	NA	NA	ZC3H18	NA	NA	NA	NA	NA	NA	NA	NA	NA	NA
TRIP13	HELLS	NA	NA	ZC3H4	NA	NA	NA	NA	NA	NA	NA	NA	NA	NA
TRMT5	HEPH	NA	NA	ZCCHC14	NA	NA	NA	NA	NA	NA	NA	NA	NA	NA
TROAP	HGF	NA	NA	ZCCHC8	NA	NA	NA	NA	NA	NA	NA	NA	NA	NA
TRPC5	HHEX	NA	NA	ZFHX4	NA	NA	NA	NA	NA	NA	NA	NA	NA	NA
TSEN2	HIP1	NA	NA	ZFP3	NA	NA	NA	NA	NA	NA	NA	NA	NA	NA
TSHZ1	HIPK2	NA	NA	ZMAT4	NA	NA	NA	NA	NA	NA	NA	NA	NA	NA
TSPYL5	HIRA	NA	NA	ZMIZ1	NA	NA	NA	NA	NA	NA	NA	NA	NA	NA
TTC30B	HIRIP3	NA	NA	ZMYND8	NA	NA	NA	NA	NA	NA	NA	NA	NA	NA
TTF2	HIST1H1A	NA	NA	ZNF141	NA	NA	NA	NA	NA	NA	NA	NA	NA	NA
TTI1	HIST1H1B	NA	NA	ZNF142	NA	NA	NA	NA	NA	NA	NA	NA	NA	NA
TTLL12	HIST1H1C	NA	NA	ZNF22	NA	NA	NA	NA	NA	NA	NA	NA	NA	NA
TTLL4	HIST1H1D	NA	NA	ZNF254	NA	NA	NA	NA	NA	NA	NA	NA	NA	NA
TUBD1	HIST1H1E	NA	NA	ZNF273	NA	NA	NA	NA	NA	NA	NA	NA	NA	NA
TUBGCP3	HIST1H2AB	NA	NA	ZNF280B	NA	NA	NA	NA	NA	NA	NA	NA	NA	NA
TUBGCP4	HIST1H2AC	NA	NA	ZNF300	NA	NA	NA	NA	NA	NA	NA	NA	NA	NA
TXLNG	HIST1H2AE	NA	NA	ZNF326	NA	NA	NA	NA	NA	NA	NA	NA	NA	NA
TXNDC16	HIST1H2AH	NA	NA	ZNF334	NA	NA	NA	NA	NA	NA	NA	NA	NA	NA
TXNRD1	HIST1H2AI	NA	NA	ZNF367	NA	NA	NA	NA	NA	NA	NA	NA	NA	NA
TYMS	HIST1H2AJ	NA	NA	ZNF385D	NA	NA	NA	NA	NA	NA	NA	NA	NA	NA
U2AF1L4	HIST1H2AK	NA	NA	ZNF454	NA	NA	NA	NA	NA	NA	NA	NA	NA	NA
UBA2	HIST1H2AL	NA	NA	ZNF473	NA	NA	NA	NA	NA	NA	NA	NA	NA	NA
UBE2C	HIST1H2AM	NA	NA	ZNF503	NA	NA	NA	NA	NA	NA	NA	NA	NA	NA
UBE2O	HIST1H2BB	NA	NA	ZNF551	NA	NA	NA	NA	NA	NA	NA	NA	NA	NA
UBE2S	HIST1H2BC	NA	NA	ZNF714	NA	NA	NA	NA	NA	NA	NA	NA	NA	NA
UBE2T	HIST1H2BD	NA	NA	ZRANB3	NA	NA	NA	NA	NA	NA	NA	NA	NA	NA
UBTF	HIST1H2BE	NA	NA	ZSCAN16	NA	NA	NA	NA	NA	NA	NA	NA	NA	NA
UCK1	HIST1H2BF	NA	NA	ZSCAN2	NA	NA	NA	NA	NA	NA	NA	NA	NA	NA
UHRF1	HIST1H2BG	NA	NA	ZWINT	NA	NA	NA	NA	NA	NA	NA	NA	NA	NA
ULBP3	HIST1H2BH	NA	NA	ZYG11A	NA	NA	NA	NA	NA	NA	NA	NA	NA	NA
UMPS	HIST1H2BI	NA	NA	NA	NA	NA	NA	NA	NA	NA	NA	NA	NA	NA
UNC5C	HIST1H2BL	NA	NA	NA	NA	NA	NA	NA	NA	NA	NA	NA	NA	NA
UNG	HIST1H2BM	NA	NA	NA	NA	NA	NA	NA	NA	NA	NA	NA	NA	NA
UNK	HIST1H2BN	NA	NA	NA	NA	NA	NA	NA	NA	NA	NA	NA	NA	NA
UPF1	HIST1H2BO	NA	NA	NA	NA	NA	NA	NA	NA	NA	NA	NA	NA	NA
UPF3B	HIST1H3A	NA	NA	NA	NA	NA	NA	NA	NA	NA	NA	NA	NA	NA
URB2	HIST1H3B	NA	NA	NA	NA	NA	NA	NA	NA	NA	NA	NA	NA	NA
USP21	HIST1H3C	NA	NA	NA	NA	NA	NA	NA	NA	NA	NA	NA	NA	NA
USP28	HIST1H3E	NA	NA	NA	NA	NA	NA	NA	NA	NA	NA	NA	NA	NA
USP3	HIST1H3F	NA	NA	NA	NA	NA	NA	NA	NA	NA	NA	NA	NA	NA
USP39	HIST1H3G	NA	NA	NA	NA	NA	NA	NA	NA	NA	NA	NA	NA	NA
USP54	HIST1H3H	NA	NA	NA	NA	NA	NA	NA	NA	NA	NA	NA	NA	NA
VAC14	HIST1H3I	NA	NA	NA	NA	NA	NA	NA	NA	NA	NA	NA	NA	NA
VAT1L	HIST1H3J	NA	NA	NA	NA	NA	NA	NA	NA	NA	NA	NA	NA	NA
VPS52	HIST1H4A	NA	NA	NA	NA	NA	NA	NA	NA	NA	NA	NA	NA	NA
VSIG10	HIST1H4B	NA	NA	NA	NA	NA	NA	NA	NA	NA	NA	NA	NA	NA
VSNL1	HIST1H4C	NA	NA	NA	NA	NA	NA	NA	NA	NA	NA	NA	NA	NA
WDHD1	HIST1H4D	NA	NA	NA	NA	NA	NA	NA	NA	NA	NA	NA	NA	NA
WDR17	HIST1H4E	NA	NA	NA	NA	NA	NA	NA	NA	NA	NA	NA	NA	NA
WDR34	HIST1H4F	NA	NA	NA	NA	NA	NA	NA	NA	NA	NA	NA	NA	NA
WDR35	HIST1H4I	NA	NA	NA	NA	NA	NA	NA	NA	NA	NA	NA	NA	NA
WDR5	HIST1H4L	NA	NA	NA	NA	NA	NA	NA	NA	NA	NA	NA	NA	NA
WDR76	HIST2H2AB	NA	NA	NA	NA	NA	NA	NA	NA	NA	NA	NA	NA	NA
WEE1	HIST2H2AC	NA	NA	NA	NA	NA	NA	NA	NA	NA	NA	NA	NA	NA
WNK3	HIST3H2A	NA	NA	NA	NA	NA	NA	NA	NA	NA	NA	NA	NA	NA
WRAP53	HIST3H2BB	NA	NA	NA	NA	NA	NA	NA	NA	NA	NA	NA	NA	NA
WWC1	HJURP	NA	NA	NA	NA	NA	NA	NA	NA	NA	NA	NA	NA	NA
XKR5	HLX	NA	NA	NA	NA	NA	NA	NA	NA	NA	NA	NA	NA	NA
XRCC1	HMBS	NA	NA	NA	NA	NA	NA	NA	NA	NA	NA	NA	NA	NA
XRCC2	HMG20A	NA	NA	NA	NA	NA	NA	NA	NA	NA	NA	NA	NA	NA
XRCC3	HMG20B	NA	NA	NA	NA	NA	NA	NA	NA	NA	NA	NA	NA	NA
YEATS4	HMGA1	NA	NA	NA	NA	NA	NA	NA	NA	NA	NA	NA	NA	NA
ZBTB44	HMGB1	NA	NA	NA	NA	NA	NA	NA	NA	NA	NA	NA	NA	NA
ZBTB9	HMGB2	NA	NA	NA	NA	NA	NA	NA	NA	NA	NA	NA	NA	NA
ZC3H18	HMGB3	NA	NA	NA	NA	NA	NA	NA	NA	NA	NA	NA	NA	NA
ZC3H4	HMGN1	NA	NA	NA	NA	NA	NA	NA	NA	NA	NA	NA	NA	NA
ZCCHC14	HMGN2	NA	NA	NA	NA	NA	NA	NA	NA	NA	NA	NA	NA	NA
ZCCHC2	HMGN3	NA	NA	NA	NA	NA	NA	NA	NA	NA	NA	NA	NA	NA
ZCCHC8	HMGXB4	NA	NA	NA	NA	NA	NA	NA	NA	NA	NA	NA	NA	NA
ZDHHC13	HMMR	NA	NA	NA	NA	NA	NA	NA	NA	NA	NA	NA	NA	NA
ZFHX4	HMOX1	NA	NA	NA	NA	NA	NA	NA	NA	NA	NA	NA	NA	NA
ZFP3	HNRNPA0	NA	NA	NA	NA	NA	NA	NA	NA	NA	NA	NA	NA	NA
ZMAT4	HNRNPA1	NA	NA	NA	NA	NA	NA	NA	NA	NA	NA	NA	NA	NA
ZMIZ1	HNRNPA2B1	NA	NA	NA	NA	NA	NA	NA	NA	NA	NA	NA	NA	NA
ZMYND8	HNRNPAB	NA	NA	NA	NA	NA	NA	NA	NA	NA	NA	NA	NA	NA
ZNF141	HNRNPD	NA	NA	NA	NA	NA	NA	NA	NA	NA	NA	NA	NA	NA
ZNF142	HNRNPF	NA	NA	NA	NA	NA	NA	NA	NA	NA	NA	NA	NA	NA
ZNF22	HNRNPH1	NA	NA	NA	NA	NA	NA	NA	NA	NA	NA	NA	NA	NA
ZNF254	HNRNPH3	NA	NA	NA	NA	NA	NA	NA	NA	NA	NA	NA	NA	NA
ZNF273	HNRNPL	NA	NA	NA	NA	NA	NA	NA	NA	NA	NA	NA	NA	NA
ZNF280B	HNRNPM	NA	NA	NA	NA	NA	NA	NA	NA	NA	NA	NA	NA	NA
ZNF300	HNRNPR	NA	NA	NA	NA	NA	NA	NA	NA	NA	NA	NA	NA	NA
ZNF326	HNRNPU	NA	NA	NA	NA	NA	NA	NA	NA	NA	NA	NA	NA	NA
ZNF334	HNRNPUL1	NA	NA	NA	NA	NA	NA	NA	NA	NA	NA	NA	NA	NA
ZNF367	HOXA2	NA	NA	NA	NA	NA	NA	NA	NA	NA	NA	NA	NA	NA
ZNF385D	HOXA3	NA	NA	NA	NA	NA	NA	NA	NA	NA	NA	NA	NA	NA
ZNF454	HOXA4	NA	NA	NA	NA	NA	NA	NA	NA	NA	NA	NA	NA	NA
ZNF473	HOXA5	NA	NA	NA	NA	NA	NA	NA	NA	NA	NA	NA	NA	NA
ZNF503	HOXA6	NA	NA	NA	NA	NA	NA	NA	NA	NA	NA	NA	NA	NA
ZNF551	HOXA7	NA	NA	NA	NA	NA	NA	NA	NA	NA	NA	NA	NA	NA
ZNF589	HOXC5	NA	NA	NA	NA	NA	NA	NA	NA	NA	NA	NA	NA	NA
ZNF714	HPDL	NA	NA	NA	NA	NA	NA	NA	NA	NA	NA	NA	NA	NA
ZNF814	HPRT1	NA	NA	NA	NA	NA	NA	NA	NA	NA	NA	NA	NA	NA
ZRANB3	HPS4	NA	NA	NA	NA	NA	NA	NA	NA	NA	NA	NA	NA	NA
ZSCAN16	HS3ST3B1	NA	NA	NA	NA	NA	NA	NA	NA	NA	NA	NA	NA	NA
ZSCAN2	HS6ST1	NA	NA	NA	NA	NA	NA	NA	NA	NA	NA	NA	NA	NA
ZWINT	HSCB	NA	NA	NA	NA	NA	NA	NA	NA	NA	NA	NA	NA	NA
ZYG11A	HSF2	NA	NA	NA	NA	NA	NA	NA	NA	NA	NA	NA	NA	NA
NA	HSP90AB1	NA	NA	NA	NA	NA	NA	NA	NA	NA	NA	NA	NA	NA
NA	HSPA12A	NA	NA	NA	NA	NA	NA	NA	NA	NA	NA	NA	NA	NA
NA	HSPA14	NA	NA	NA	NA	NA	NA	NA	NA	NA	NA	NA	NA	NA
NA	HSPA2	NA	NA	NA	NA	NA	NA	NA	NA	NA	NA	NA	NA	NA
NA	HSPB11	NA	NA	NA	NA	NA	NA	NA	NA	NA	NA	NA	NA	NA
NA	HSPBAP1	NA	NA	NA	NA	NA	NA	NA	NA	NA	NA	NA	NA	NA
NA	HSPD1	NA	NA	NA	NA	NA	NA	NA	NA	NA	NA	NA	NA	NA
NA	HSPH1	NA	NA	NA	NA	NA	NA	NA	NA	NA	NA	NA	NA	NA
NA	HTATSF1	NA	NA	NA	NA	NA	NA	NA	NA	NA	NA	NA	NA	NA
NA	HTR2B	NA	NA	NA	NA	NA	NA	NA	NA	NA	NA	NA	NA	NA
NA	HUNK	NA	NA	NA	NA	NA	NA	NA	NA	NA	NA	NA	NA	NA
NA	HYLS1	NA	NA	NA	NA	NA	NA	NA	NA	NA	NA	NA	NA	NA
NA	HYOU1	NA	NA	NA	NA	NA	NA	NA	NA	NA	NA	NA	NA	NA
NA	ICA1L	NA	NA	NA	NA	NA	NA	NA	NA	NA	NA	NA	NA	NA
NA	ICK	NA	NA	NA	NA	NA	NA	NA	NA	NA	NA	NA	NA	NA
NA	ID1	NA	NA	NA	NA	NA	NA	NA	NA	NA	NA	NA	NA	NA
NA	ID2	NA	NA	NA	NA	NA	NA	NA	NA	NA	NA	NA	NA	NA
NA	ID4	NA	NA	NA	NA	NA	NA	NA	NA	NA	NA	NA	NA	NA
NA	IDH2	NA	NA	NA	NA	NA	NA	NA	NA	NA	NA	NA	NA	NA
NA	IDH3A	NA	NA	NA	NA	NA	NA	NA	NA	NA	NA	NA	NA	NA
NA	IER2	NA	NA	NA	NA	NA	NA	NA	NA	NA	NA	NA	NA	NA
NA	IFI16	NA	NA	NA	NA	NA	NA	NA	NA	NA	NA	NA	NA	NA
NA	IFRD2	NA	NA	NA	NA	NA	NA	NA	NA	NA	NA	NA	NA	NA
NA	IFT122	NA	NA	NA	NA	NA	NA	NA	NA	NA	NA	NA	NA	NA
NA	IFT46	NA	NA	NA	NA	NA	NA	NA	NA	NA	NA	NA	NA	NA
NA	IFT57	NA	NA	NA	NA	NA	NA	NA	NA	NA	NA	NA	NA	NA
NA	IFT74	NA	NA	NA	NA	NA	NA	NA	NA	NA	NA	NA	NA	NA
NA	IFT80	NA	NA	NA	NA	NA	NA	NA	NA	NA	NA	NA	NA	NA
NA	IFT81	NA	NA	NA	NA	NA	NA	NA	NA	NA	NA	NA	NA	NA
NA	IFT88	NA	NA	NA	NA	NA	NA	NA	NA	NA	NA	NA	NA	NA
NA	IGF2BP1	NA	NA	NA	NA	NA	NA	NA	NA	NA	NA	NA	NA	NA
NA	IGSF10	NA	NA	NA	NA	NA	NA	NA	NA	NA	NA	NA	NA	NA
NA	IKZF4	NA	NA	NA	NA	NA	NA	NA	NA	NA	NA	NA	NA	NA
NA	IL17RE	NA	NA	NA	NA	NA	NA	NA	NA	NA	NA	NA	NA	NA
NA	IL18R1	NA	NA	NA	NA	NA	NA	NA	NA	NA	NA	NA	NA	NA
NA	IL1R1	NA	NA	NA	NA	NA	NA	NA	NA	NA	NA	NA	NA	NA
NA	IL31RA	NA	NA	NA	NA	NA	NA	NA	NA	NA	NA	NA	NA	NA
NA	IL6R	NA	NA	NA	NA	NA	NA	NA	NA	NA	NA	NA	NA	NA
NA	ILF2	NA	NA	NA	NA	NA	NA	NA	NA	NA	NA	NA	NA	NA
NA	ILF3	NA	NA	NA	NA	NA	NA	NA	NA	NA	NA	NA	NA	NA
NA	ILKAP	NA	NA	NA	NA	NA	NA	NA	NA	NA	NA	NA	NA	NA
NA	IMMP1L	NA	NA	NA	NA	NA	NA	NA	NA	NA	NA	NA	NA	NA
NA	IMP4	NA	NA	NA	NA	NA	NA	NA	NA	NA	NA	NA	NA	NA
NA	IMPDH2	NA	NA	NA	NA	NA	NA	NA	NA	NA	NA	NA	NA	NA
NA	INCENP	NA	NA	NA	NA	NA	NA	NA	NA	NA	NA	NA	NA	NA
NA	ING3	NA	NA	NA	NA	NA	NA	NA	NA	NA	NA	NA	NA	NA
NA	INPP5B	NA	NA	NA	NA	NA	NA	NA	NA	NA	NA	NA	NA	NA
NA	INTS2	NA	NA	NA	NA	NA	NA	NA	NA	NA	NA	NA	NA	NA
NA	INTS4	NA	NA	NA	NA	NA	NA	NA	NA	NA	NA	NA	NA	NA
NA	INTS7	NA	NA	NA	NA	NA	NA	NA	NA	NA	NA	NA	NA	NA
NA	INTS8	NA	NA	NA	NA	NA	NA	NA	NA	NA	NA	NA	NA	NA
NA	INTS9	NA	NA	NA	NA	NA	NA	NA	NA	NA	NA	NA	NA	NA
NA	INVS	NA	NA	NA	NA	NA	NA	NA	NA	NA	NA	NA	NA	NA
NA	IPO4	NA	NA	NA	NA	NA	NA	NA	NA	NA	NA	NA	NA	NA
NA	IPO5	NA	NA	NA	NA	NA	NA	NA	NA	NA	NA	NA	NA	NA
NA	IPO9	NA	NA	NA	NA	NA	NA	NA	NA	NA	NA	NA	NA	NA
NA	IQCB1	NA	NA	NA	NA	NA	NA	NA	NA	NA	NA	NA	NA	NA
NA	IQCC	NA	NA	NA	NA	NA	NA	NA	NA	NA	NA	NA	NA	NA
NA	IQCG	NA	NA	NA	NA	NA	NA	NA	NA	NA	NA	NA	NA	NA
NA	IQGAP3	NA	NA	NA	NA	NA	NA	NA	NA	NA	NA	NA	NA	NA
NA	IRAK1BP1	NA	NA	NA	NA	NA	NA	NA	NA	NA	NA	NA	NA	NA
NA	IRAK3	NA	NA	NA	NA	NA	NA	NA	NA	NA	NA	NA	NA	NA
NA	IRF2	NA	NA	NA	NA	NA	NA	NA	NA	NA	NA	NA	NA	NA
NA	IRS1	NA	NA	NA	NA	NA	NA	NA	NA	NA	NA	NA	NA	NA
NA	ISLR	NA	NA	NA	NA	NA	NA	NA	NA	NA	NA	NA	NA	NA
NA	ISOC1	NA	NA	NA	NA	NA	NA	NA	NA	NA	NA	NA	NA	NA
NA	ITGB3BP	NA	NA	NA	NA	NA	NA	NA	NA	NA	NA	NA	NA	NA
NA	ITPA	NA	NA	NA	NA	NA	NA	NA	NA	NA	NA	NA	NA	NA
NA	ITPRIPL1	NA	NA	NA	NA	NA	NA	NA	NA	NA	NA	NA	NA	NA
NA	JAGN1	NA	NA	NA	NA	NA	NA	NA	NA	NA	NA	NA	NA	NA
NA	KARS	NA	NA	NA	NA	NA	NA	NA	NA	NA	NA	NA	NA	NA
NA	KAT2A	NA	NA	NA	NA	NA	NA	NA	NA	NA	NA	NA	NA	NA
NA	KAT5	NA	NA	NA	NA	NA	NA	NA	NA	NA	NA	NA	NA	NA
NA	KBTBD6	NA	NA	NA	NA	NA	NA	NA	NA	NA	NA	NA	NA	NA
NA	KBTBD7	NA	NA	NA	NA	NA	NA	NA	NA	NA	NA	NA	NA	NA
NA	KCNAB3	NA	NA	NA	NA	NA	NA	NA	NA	NA	NA	NA	NA	NA
NA	KCNE4	NA	NA	NA	NA	NA	NA	NA	NA	NA	NA	NA	NA	NA
NA	KCNIP3	NA	NA	NA	NA	NA	NA	NA	NA	NA	NA	NA	NA	NA
NA	KCNJ8	NA	NA	NA	NA	NA	NA	NA	NA	NA	NA	NA	NA	NA
NA	KCNK2	NA	NA	NA	NA	NA	NA	NA	NA	NA	NA	NA	NA	NA
NA	KCNQ5	NA	NA	NA	NA	NA	NA	NA	NA	NA	NA	NA	NA	NA
NA	KCTD3	NA	NA	NA	NA	NA	NA	NA	NA	NA	NA	NA	NA	NA
NA	KCTD6	NA	NA	NA	NA	NA	NA	NA	NA	NA	NA	NA	NA	NA
NA	KDELC2	NA	NA	NA	NA	NA	NA	NA	NA	NA	NA	NA	NA	NA
NA	KDM1A	NA	NA	NA	NA	NA	NA	NA	NA	NA	NA	NA	NA	NA
NA	KDM2B	NA	NA	NA	NA	NA	NA	NA	NA	NA	NA	NA	NA	NA
NA	KDM3B	NA	NA	NA	NA	NA	NA	NA	NA	NA	NA	NA	NA	NA
NA	KDM4D	NA	NA	NA	NA	NA	NA	NA	NA	NA	NA	NA	NA	NA
NA	KHDRBS1	NA	NA	NA	NA	NA	NA	NA	NA	NA	NA	NA	NA	NA
NA	KHDRBS3	NA	NA	NA	NA	NA	NA	NA	NA	NA	NA	NA	NA	NA
NA	KHK	NA	NA	NA	NA	NA	NA	NA	NA	NA	NA	NA	NA	NA
NA	KHSRP	NA	NA	NA	NA	NA	NA	NA	NA	NA	NA	NA	NA	NA
NA	KIAA0586	NA	NA	NA	NA	NA	NA	NA	NA	NA	NA	NA	NA	NA
NA	KIAA0753	NA	NA	NA	NA	NA	NA	NA	NA	NA	NA	NA	NA	NA
NA	KIAA1586	NA	NA	NA	NA	NA	NA	NA	NA	NA	NA	NA	NA	NA
NA	KIAA1841	NA	NA	NA	NA	NA	NA	NA	NA	NA	NA	NA	NA	NA
NA	KIF11	NA	NA	NA	NA	NA	NA	NA	NA	NA	NA	NA	NA	NA
NA	KIF13A	NA	NA	NA	NA	NA	NA	NA	NA	NA	NA	NA	NA	NA
NA	KIF14	NA	NA	NA	NA	NA	NA	NA	NA	NA	NA	NA	NA	NA
NA	KIF15	NA	NA	NA	NA	NA	NA	NA	NA	NA	NA	NA	NA	NA
NA	KIF18A	NA	NA	NA	NA	NA	NA	NA	NA	NA	NA	NA	NA	NA
NA	KIF18B	NA	NA	NA	NA	NA	NA	NA	NA	NA	NA	NA	NA	NA
NA	KIF20A	NA	NA	NA	NA	NA	NA	NA	NA	NA	NA	NA	NA	NA
NA	KIF20B	NA	NA	NA	NA	NA	NA	NA	NA	NA	NA	NA	NA	NA
NA	KIF22	NA	NA	NA	NA	NA	NA	NA	NA	NA	NA	NA	NA	NA
NA	KIF23	NA	NA	NA	NA	NA	NA	NA	NA	NA	NA	NA	NA	NA
NA	KIF24	NA	NA	NA	NA	NA	NA	NA	NA	NA	NA	NA	NA	NA
NA	KIF2A	NA	NA	NA	NA	NA	NA	NA	NA	NA	NA	NA	NA	NA
NA	KIF2C	NA	NA	NA	NA	NA	NA	NA	NA	NA	NA	NA	NA	NA
NA	KIF4A	NA	NA	NA	NA	NA	NA	NA	NA	NA	NA	NA	NA	NA
NA	KIFC1	NA	NA	NA	NA	NA	NA	NA	NA	NA	NA	NA	NA	NA
NA	KITLG	NA	NA	NA	NA	NA	NA	NA	NA	NA	NA	NA	NA	NA
NA	KLF3	NA	NA	NA	NA	NA	NA	NA	NA	NA	NA	NA	NA	NA
NA	KLHL11	NA	NA	NA	NA	NA	NA	NA	NA	NA	NA	NA	NA	NA
NA	KLHL13	NA	NA	NA	NA	NA	NA	NA	NA	NA	NA	NA	NA	NA
NA	KLHL15	NA	NA	NA	NA	NA	NA	NA	NA	NA	NA	NA	NA	NA
NA	KLHL8	NA	NA	NA	NA	NA	NA	NA	NA	NA	NA	NA	NA	NA
NA	KNTC1	NA	NA	NA	NA	NA	NA	NA	NA	NA	NA	NA	NA	NA
NA	KPNB1	NA	NA	NA	NA	NA	NA	NA	NA	NA	NA	NA	NA	NA
NA	KRI1	NA	NA	NA	NA	NA	NA	NA	NA	NA	NA	NA	NA	NA
NA	KRR1	NA	NA	NA	NA	NA	NA	NA	NA	NA	NA	NA	NA	NA
NA	KRT19	NA	NA	NA	NA	NA	NA	NA	NA	NA	NA	NA	NA	NA
NA	KRT7	NA	NA	NA	NA	NA	NA	NA	NA	NA	NA	NA	NA	NA
NA	KYNU	NA	NA	NA	NA	NA	NA	NA	NA	NA	NA	NA	NA	NA
NA	L2HGDH	NA	NA	NA	NA	NA	NA	NA	NA	NA	NA	NA	NA	NA
NA	LANCL1	NA	NA	NA	NA	NA	NA	NA	NA	NA	NA	NA	NA	NA
NA	LANCL2	NA	NA	NA	NA	NA	NA	NA	NA	NA	NA	NA	NA	NA
NA	LARP1	NA	NA	NA	NA	NA	NA	NA	NA	NA	NA	NA	NA	NA
NA	LARP4	NA	NA	NA	NA	NA	NA	NA	NA	NA	NA	NA	NA	NA
NA	LARP7	NA	NA	NA	NA	NA	NA	NA	NA	NA	NA	NA	NA	NA
NA	LARS	NA	NA	NA	NA	NA	NA	NA	NA	NA	NA	NA	NA	NA
NA	LARS2	NA	NA	NA	NA	NA	NA	NA	NA	NA	NA	NA	NA	NA
NA	LAS1L	NA	NA	NA	NA	NA	NA	NA	NA	NA	NA	NA	NA	NA
NA	LBR	NA	NA	NA	NA	NA	NA	NA	NA	NA	NA	NA	NA	NA
NA	LCMT2	NA	NA	NA	NA	NA	NA	NA	NA	NA	NA	NA	NA	NA
NA	LCORL	NA	NA	NA	NA	NA	NA	NA	NA	NA	NA	NA	NA	NA
NA	LCTL	NA	NA	NA	NA	NA	NA	NA	NA	NA	NA	NA	NA	NA
NA	LDB2	NA	NA	NA	NA	NA	NA	NA	NA	NA	NA	NA	NA	NA
NA	LDHB	NA	NA	NA	NA	NA	NA	NA	NA	NA	NA	NA	NA	NA
NA	LDLRAD3	NA	NA	NA	NA	NA	NA	NA	NA	NA	NA	NA	NA	NA
NA	LHFPL2	NA	NA	NA	NA	NA	NA	NA	NA	NA	NA	NA	NA	NA
NA	LIAS	NA	NA	NA	NA	NA	NA	NA	NA	NA	NA	NA	NA	NA
NA	LIFR	NA	NA	NA	NA	NA	NA	NA	NA	NA	NA	NA	NA	NA
NA	LIG1	NA	NA	NA	NA	NA	NA	NA	NA	NA	NA	NA	NA	NA
NA	LIG3	NA	NA	NA	NA	NA	NA	NA	NA	NA	NA	NA	NA	NA
NA	LIMD1	NA	NA	NA	NA	NA	NA	NA	NA	NA	NA	NA	NA	NA
NA	LIN52	NA	NA	NA	NA	NA	NA	NA	NA	NA	NA	NA	NA	NA
NA	LIN54	NA	NA	NA	NA	NA	NA	NA	NA	NA	NA	NA	NA	NA
NA	LIN7A	NA	NA	NA	NA	NA	NA	NA	NA	NA	NA	NA	NA	NA
NA	LIN9	NA	NA	NA	NA	NA	NA	NA	NA	NA	NA	NA	NA	NA
NA	LIPT1	NA	NA	NA	NA	NA	NA	NA	NA	NA	NA	NA	NA	NA
NA	LMAN2L	NA	NA	NA	NA	NA	NA	NA	NA	NA	NA	NA	NA	NA
NA	LMNB1	NA	NA	NA	NA	NA	NA	NA	NA	NA	NA	NA	NA	NA
NA	LMNB2	NA	NA	NA	NA	NA	NA	NA	NA	NA	NA	NA	NA	NA
NA	LMO4	NA	NA	NA	NA	NA	NA	NA	NA	NA	NA	NA	NA	NA
NA	LOC339803	NA	NA	NA	NA	NA	NA	NA	NA	NA	NA	NA	NA	NA
NA	LONP1	NA	NA	NA	NA	NA	NA	NA	NA	NA	NA	NA	NA	NA
NA	LONRF1	NA	NA	NA	NA	NA	NA	NA	NA	NA	NA	NA	NA	NA
NA	LPAR6	NA	NA	NA	NA	NA	NA	NA	NA	NA	NA	NA	NA	NA
NA	LPCAT1	NA	NA	NA	NA	NA	NA	NA	NA	NA	NA	NA	NA	NA
NA	LRIG3	NA	NA	NA	NA	NA	NA	NA	NA	NA	NA	NA	NA	NA
NA	LRP11	NA	NA	NA	NA	NA	NA	NA	NA	NA	NA	NA	NA	NA
NA	LRP4	NA	NA	NA	NA	NA	NA	NA	NA	NA	NA	NA	NA	NA
NA	LRPPRC	NA	NA	NA	NA	NA	NA	NA	NA	NA	NA	NA	NA	NA
NA	LRRC46	NA	NA	NA	NA	NA	NA	NA	NA	NA	NA	NA	NA	NA
NA	LRRC49	NA	NA	NA	NA	NA	NA	NA	NA	NA	NA	NA	NA	NA
NA	LRRC59	NA	NA	NA	NA	NA	NA	NA	NA	NA	NA	NA	NA	NA
NA	LRRC61	NA	NA	NA	NA	NA	NA	NA	NA	NA	NA	NA	NA	NA
NA	LRRC8B	NA	NA	NA	NA	NA	NA	NA	NA	NA	NA	NA	NA	NA
NA	LRRCC1	NA	NA	NA	NA	NA	NA	NA	NA	NA	NA	NA	NA	NA
NA	LRRN1	NA	NA	NA	NA	NA	NA	NA	NA	NA	NA	NA	NA	NA
NA	LRRTM2	NA	NA	NA	NA	NA	NA	NA	NA	NA	NA	NA	NA	NA
NA	LRTOMT	NA	NA	NA	NA	NA	NA	NA	NA	NA	NA	NA	NA	NA
NA	LSAMP	NA	NA	NA	NA	NA	NA	NA	NA	NA	NA	NA	NA	NA
NA	LSG1	NA	NA	NA	NA	NA	NA	NA	NA	NA	NA	NA	NA	NA
NA	LSM2	NA	NA	NA	NA	NA	NA	NA	NA	NA	NA	NA	NA	NA
NA	LSM5	NA	NA	NA	NA	NA	NA	NA	NA	NA	NA	NA	NA	NA
NA	LSM6	NA	NA	NA	NA	NA	NA	NA	NA	NA	NA	NA	NA	NA
NA	LSM7	NA	NA	NA	NA	NA	NA	NA	NA	NA	NA	NA	NA	NA
NA	LTV1	NA	NA	NA	NA	NA	NA	NA	NA	NA	NA	NA	NA	NA
NA	LUC7L	NA	NA	NA	NA	NA	NA	NA	NA	NA	NA	NA	NA	NA
NA	LXN	NA	NA	NA	NA	NA	NA	NA	NA	NA	NA	NA	NA	NA
NA	LYAR	NA	NA	NA	NA	NA	NA	NA	NA	NA	NA	NA	NA	NA
NA	LYPD1	NA	NA	NA	NA	NA	NA	NA	NA	NA	NA	NA	NA	NA
NA	LYPD6	NA	NA	NA	NA	NA	NA	NA	NA	NA	NA	NA	NA	NA
NA	LYRM1	NA	NA	NA	NA	NA	NA	NA	NA	NA	NA	NA	NA	NA
NA	LYRM2	NA	NA	NA	NA	NA	NA	NA	NA	NA	NA	NA	NA	NA
NA	LYRM4	NA	NA	NA	NA	NA	NA	NA	NA	NA	NA	NA	NA	NA
NA	LZIC	NA	NA	NA	NA	NA	NA	NA	NA	NA	NA	NA	NA	NA
NA	MAB21L2	NA	NA	NA	NA	NA	NA	NA	NA	NA	NA	NA	NA	NA
NA	MAD2L1	NA	NA	NA	NA	NA	NA	NA	NA	NA	NA	NA	NA	NA
NA	MAD2L2	NA	NA	NA	NA	NA	NA	NA	NA	NA	NA	NA	NA	NA
NA	MADD	NA	NA	NA	NA	NA	NA	NA	NA	NA	NA	NA	NA	NA
NA	MAGI3	NA	NA	NA	NA	NA	NA	NA	NA	NA	NA	NA	NA	NA
NA	MAGOHB	NA	NA	NA	NA	NA	NA	NA	NA	NA	NA	NA	NA	NA
NA	MAMLD1	NA	NA	NA	NA	NA	NA	NA	NA	NA	NA	NA	NA	NA
NA	MAN1A1	NA	NA	NA	NA	NA	NA	NA	NA	NA	NA	NA	NA	NA
NA	MAOB	NA	NA	NA	NA	NA	NA	NA	NA	NA	NA	NA	NA	NA
NA	MAP2K6	NA	NA	NA	NA	NA	NA	NA	NA	NA	NA	NA	NA	NA
NA	MAP3K14	NA	NA	NA	NA	NA	NA	NA	NA	NA	NA	NA	NA	NA
NA	MAP3K4	NA	NA	NA	NA	NA	NA	NA	NA	NA	NA	NA	NA	NA
NA	MAP3K5	NA	NA	NA	NA	NA	NA	NA	NA	NA	NA	NA	NA	NA
NA	MARCKS	NA	NA	NA	NA	NA	NA	NA	NA	NA	NA	NA	NA	NA
NA	MARK2	NA	NA	NA	NA	NA	NA	NA	NA	NA	NA	NA	NA	NA
NA	MASTL	NA	NA	NA	NA	NA	NA	NA	NA	NA	NA	NA	NA	NA
NA	MAT2A	NA	NA	NA	NA	NA	NA	NA	NA	NA	NA	NA	NA	NA
NA	MAT2B	NA	NA	NA	NA	NA	NA	NA	NA	NA	NA	NA	NA	NA
NA	MATN2	NA	NA	NA	NA	NA	NA	NA	NA	NA	NA	NA	NA	NA
NA	MATN3	NA	NA	NA	NA	NA	NA	NA	NA	NA	NA	NA	NA	NA
NA	MAZ	NA	NA	NA	NA	NA	NA	NA	NA	NA	NA	NA	NA	NA
NA	MBD3	NA	NA	NA	NA	NA	NA	NA	NA	NA	NA	NA	NA	NA
NA	MBNL3	NA	NA	NA	NA	NA	NA	NA	NA	NA	NA	NA	NA	NA
NA	MBOAT1	NA	NA	NA	NA	NA	NA	NA	NA	NA	NA	NA	NA	NA
NA	MBTD1	NA	NA	NA	NA	NA	NA	NA	NA	NA	NA	NA	NA	NA
NA	MC1R	NA	NA	NA	NA	NA	NA	NA	NA	NA	NA	NA	NA	NA
NA	MCCC2	NA	NA	NA	NA	NA	NA	NA	NA	NA	NA	NA	NA	NA
NA	MCM10	NA	NA	NA	NA	NA	NA	NA	NA	NA	NA	NA	NA	NA
NA	MCM2	NA	NA	NA	NA	NA	NA	NA	NA	NA	NA	NA	NA	NA
NA	MCM3	NA	NA	NA	NA	NA	NA	NA	NA	NA	NA	NA	NA	NA
NA	MCM4	NA	NA	NA	NA	NA	NA	NA	NA	NA	NA	NA	NA	NA
NA	MCM5	NA	NA	NA	NA	NA	NA	NA	NA	NA	NA	NA	NA	NA
NA	MCM6	NA	NA	NA	NA	NA	NA	NA	NA	NA	NA	NA	NA	NA
NA	MCM7	NA	NA	NA	NA	NA	NA	NA	NA	NA	NA	NA	NA	NA
NA	MCM8	NA	NA	NA	NA	NA	NA	NA	NA	NA	NA	NA	NA	NA
NA	MCM9	NA	NA	NA	NA	NA	NA	NA	NA	NA	NA	NA	NA	NA
NA	MCRS1	NA	NA	NA	NA	NA	NA	NA	NA	NA	NA	NA	NA	NA
NA	MDC1	NA	NA	NA	NA	NA	NA	NA	NA	NA	NA	NA	NA	NA
NA	MDFIC	NA	NA	NA	NA	NA	NA	NA	NA	NA	NA	NA	NA	NA
NA	MDK	NA	NA	NA	NA	NA	NA	NA	NA	NA	NA	NA	NA	NA
NA	MDM1	NA	NA	NA	NA	NA	NA	NA	NA	NA	NA	NA	NA	NA
NA	MDM4	NA	NA	NA	NA	NA	NA	NA	NA	NA	NA	NA	NA	NA
NA	MDN1	NA	NA	NA	NA	NA	NA	NA	NA	NA	NA	NA	NA	NA
NA	ME2	NA	NA	NA	NA	NA	NA	NA	NA	NA	NA	NA	NA	NA
NA	ME3	NA	NA	NA	NA	NA	NA	NA	NA	NA	NA	NA	NA	NA
NA	MECOM	NA	NA	NA	NA	NA	NA	NA	NA	NA	NA	NA	NA	NA
NA	MED1	NA	NA	NA	NA	NA	NA	NA	NA	NA	NA	NA	NA	NA
NA	MED10	NA	NA	NA	NA	NA	NA	NA	NA	NA	NA	NA	NA	NA
NA	MED18	NA	NA	NA	NA	NA	NA	NA	NA	NA	NA	NA	NA	NA
NA	MED21	NA	NA	NA	NA	NA	NA	NA	NA	NA	NA	NA	NA	NA
NA	MED22	NA	NA	NA	NA	NA	NA	NA	NA	NA	NA	NA	NA	NA
NA	MED24	NA	NA	NA	NA	NA	NA	NA	NA	NA	NA	NA	NA	NA
NA	MED28	NA	NA	NA	NA	NA	NA	NA	NA	NA	NA	NA	NA	NA
NA	MED4	NA	NA	NA	NA	NA	NA	NA	NA	NA	NA	NA	NA	NA
NA	MED6	NA	NA	NA	NA	NA	NA	NA	NA	NA	NA	NA	NA	NA
NA	MEF2C	NA	NA	NA	NA	NA	NA	NA	NA	NA	NA	NA	NA	NA
NA	MEIS1	NA	NA	NA	NA	NA	NA	NA	NA	NA	NA	NA	NA	NA
NA	MEIS2	NA	NA	NA	NA	NA	NA	NA	NA	NA	NA	NA	NA	NA
NA	MELK	NA	NA	NA	NA	NA	NA	NA	NA	NA	NA	NA	NA	NA
NA	MEN1	NA	NA	NA	NA	NA	NA	NA	NA	NA	NA	NA	NA	NA
NA	MEPCE	NA	NA	NA	NA	NA	NA	NA	NA	NA	NA	NA	NA	NA
NA	METAP1	NA	NA	NA	NA	NA	NA	NA	NA	NA	NA	NA	NA	NA
NA	METAP1D	NA	NA	NA	NA	NA	NA	NA	NA	NA	NA	NA	NA	NA
NA	METTL1	NA	NA	NA	NA	NA	NA	NA	NA	NA	NA	NA	NA	NA
NA	METTL4	NA	NA	NA	NA	NA	NA	NA	NA	NA	NA	NA	NA	NA
NA	METTL7A	NA	NA	NA	NA	NA	NA	NA	NA	NA	NA	NA	NA	NA
NA	MEX3B	NA	NA	NA	NA	NA	NA	NA	NA	NA	NA	NA	NA	NA
NA	MEX3D	NA	NA	NA	NA	NA	NA	NA	NA	NA	NA	NA	NA	NA
NA	MFHAS1	NA	NA	NA	NA	NA	NA	NA	NA	NA	NA	NA	NA	NA
NA	MFSD2A	NA	NA	NA	NA	NA	NA	NA	NA	NA	NA	NA	NA	NA
NA	MGA	NA	NA	NA	NA	NA	NA	NA	NA	NA	NA	NA	NA	NA
NA	MID1	NA	NA	NA	NA	NA	NA	NA	NA	NA	NA	NA	NA	NA
NA	MID1IP1	NA	NA	NA	NA	NA	NA	NA	NA	NA	NA	NA	NA	NA
NA	MID2	NA	NA	NA	NA	NA	NA	NA	NA	NA	NA	NA	NA	NA
NA	MIDN	NA	NA	NA	NA	NA	NA	NA	NA	NA	NA	NA	NA	NA
NA	MIOS	NA	NA	NA	NA	NA	NA	NA	NA	NA	NA	NA	NA	NA
NA	MIPEP	NA	NA	NA	NA	NA	NA	NA	NA	NA	NA	NA	NA	NA
NA	MIS12	NA	NA	NA	NA	NA	NA	NA	NA	NA	NA	NA	NA	NA
NA	MITD1	NA	NA	NA	NA	NA	NA	NA	NA	NA	NA	NA	NA	NA
NA	MKI67	NA	NA	NA	NA	NA	NA	NA	NA	NA	NA	NA	NA	NA
NA	MKS1	NA	NA	NA	NA	NA	NA	NA	NA	NA	NA	NA	NA	NA
NA	MLH1	NA	NA	NA	NA	NA	NA	NA	NA	NA	NA	NA	NA	NA
NA	MLLT10	NA	NA	NA	NA	NA	NA	NA	NA	NA	NA	NA	NA	NA
NA	MLLT3	NA	NA	NA	NA	NA	NA	NA	NA	NA	NA	NA	NA	NA
NA	MLPH	NA	NA	NA	NA	NA	NA	NA	NA	NA	NA	NA	NA	NA
NA	MMACHC	NA	NA	NA	NA	NA	NA	NA	NA	NA	NA	NA	NA	NA
NA	MMD	NA	NA	NA	NA	NA	NA	NA	NA	NA	NA	NA	NA	NA
NA	MMS22L	NA	NA	NA	NA	NA	NA	NA	NA	NA	NA	NA	NA	NA
NA	MND1	NA	NA	NA	NA	NA	NA	NA	NA	NA	NA	NA	NA	NA
NA	MNS1	NA	NA	NA	NA	NA	NA	NA	NA	NA	NA	NA	NA	NA
NA	MORC2	NA	NA	NA	NA	NA	NA	NA	NA	NA	NA	NA	NA	NA
NA	MORN2	NA	NA	NA	NA	NA	NA	NA	NA	NA	NA	NA	NA	NA
NA	MOXD1	NA	NA	NA	NA	NA	NA	NA	NA	NA	NA	NA	NA	NA
NA	MPDU1	NA	NA	NA	NA	NA	NA	NA	NA	NA	NA	NA	NA	NA
NA	MPHOSPH6	NA	NA	NA	NA	NA	NA	NA	NA	NA	NA	NA	NA	NA
NA	MPHOSPH9	NA	NA	NA	NA	NA	NA	NA	NA	NA	NA	NA	NA	NA
NA	MPP6	NA	NA	NA	NA	NA	NA	NA	NA	NA	NA	NA	NA	NA
NA	MRFAP1L1	NA	NA	NA	NA	NA	NA	NA	NA	NA	NA	NA	NA	NA
NA	MRPL1	NA	NA	NA	NA	NA	NA	NA	NA	NA	NA	NA	NA	NA
NA	MRPL13	NA	NA	NA	NA	NA	NA	NA	NA	NA	NA	NA	NA	NA
NA	MRPL15	NA	NA	NA	NA	NA	NA	NA	NA	NA	NA	NA	NA	NA
NA	MRPL18	NA	NA	NA	NA	NA	NA	NA	NA	NA	NA	NA	NA	NA
NA	MRPL24	NA	NA	NA	NA	NA	NA	NA	NA	NA	NA	NA	NA	NA
NA	MRPL3	NA	NA	NA	NA	NA	NA	NA	NA	NA	NA	NA	NA	NA
NA	MRPL30	NA	NA	NA	NA	NA	NA	NA	NA	NA	NA	NA	NA	NA
NA	MRPL35	NA	NA	NA	NA	NA	NA	NA	NA	NA	NA	NA	NA	NA
NA	MRPL38	NA	NA	NA	NA	NA	NA	NA	NA	NA	NA	NA	NA	NA
NA	MRPL39	NA	NA	NA	NA	NA	NA	NA	NA	NA	NA	NA	NA	NA
NA	MRPL42	NA	NA	NA	NA	NA	NA	NA	NA	NA	NA	NA	NA	NA
NA	MRPL44	NA	NA	NA	NA	NA	NA	NA	NA	NA	NA	NA	NA	NA
NA	MRPL47	NA	NA	NA	NA	NA	NA	NA	NA	NA	NA	NA	NA	NA
NA	MRPL48	NA	NA	NA	NA	NA	NA	NA	NA	NA	NA	NA	NA	NA
NA	MRPL9	NA	NA	NA	NA	NA	NA	NA	NA	NA	NA	NA	NA	NA
NA	MRPS12	NA	NA	NA	NA	NA	NA	NA	NA	NA	NA	NA	NA	NA
NA	MRPS14	NA	NA	NA	NA	NA	NA	NA	NA	NA	NA	NA	NA	NA
NA	MRPS15	NA	NA	NA	NA	NA	NA	NA	NA	NA	NA	NA	NA	NA
NA	MRPS16	NA	NA	NA	NA	NA	NA	NA	NA	NA	NA	NA	NA	NA
NA	MRPS17	NA	NA	NA	NA	NA	NA	NA	NA	NA	NA	NA	NA	NA
NA	MRPS18B	NA	NA	NA	NA	NA	NA	NA	NA	NA	NA	NA	NA	NA
NA	MRPS2	NA	NA	NA	NA	NA	NA	NA	NA	NA	NA	NA	NA	NA
NA	MRPS23	NA	NA	NA	NA	NA	NA	NA	NA	NA	NA	NA	NA	NA
NA	MRPS27	NA	NA	NA	NA	NA	NA	NA	NA	NA	NA	NA	NA	NA
NA	MRPS28	NA	NA	NA	NA	NA	NA	NA	NA	NA	NA	NA	NA	NA
NA	MRPS30	NA	NA	NA	NA	NA	NA	NA	NA	NA	NA	NA	NA	NA
NA	MRPS31	NA	NA	NA	NA	NA	NA	NA	NA	NA	NA	NA	NA	NA
NA	MRPS35	NA	NA	NA	NA	NA	NA	NA	NA	NA	NA	NA	NA	NA
NA	MRPS9	NA	NA	NA	NA	NA	NA	NA	NA	NA	NA	NA	NA	NA
NA	MRRF	NA	NA	NA	NA	NA	NA	NA	NA	NA	NA	NA	NA	NA
NA	MRTO4	NA	NA	NA	NA	NA	NA	NA	NA	NA	NA	NA	NA	NA
NA	MSH2	NA	NA	NA	NA	NA	NA	NA	NA	NA	NA	NA	NA	NA
NA	MSH6	NA	NA	NA	NA	NA	NA	NA	NA	NA	NA	NA	NA	NA
NA	MSL1	NA	NA	NA	NA	NA	NA	NA	NA	NA	NA	NA	NA	NA
NA	MSL2	NA	NA	NA	NA	NA	NA	NA	NA	NA	NA	NA	NA	NA
NA	MT1A	NA	NA	NA	NA	NA	NA	NA	NA	NA	NA	NA	NA	NA
NA	MTA1	NA	NA	NA	NA	NA	NA	NA	NA	NA	NA	NA	NA	NA
NA	MTA2	NA	NA	NA	NA	NA	NA	NA	NA	NA	NA	NA	NA	NA
NA	MTBP	NA	NA	NA	NA	NA	NA	NA	NA	NA	NA	NA	NA	NA
NA	MTF2	NA	NA	NA	NA	NA	NA	NA	NA	NA	NA	NA	NA	NA
NA	MTFP1	NA	NA	NA	NA	NA	NA	NA	NA	NA	NA	NA	NA	NA
NA	MTHFD1	NA	NA	NA	NA	NA	NA	NA	NA	NA	NA	NA	NA	NA
NA	MTIF2	NA	NA	NA	NA	NA	NA	NA	NA	NA	NA	NA	NA	NA
NA	MTMR11	NA	NA	NA	NA	NA	NA	NA	NA	NA	NA	NA	NA	NA
NA	MTMR2	NA	NA	NA	NA	NA	NA	NA	NA	NA	NA	NA	NA	NA
NA	MTMR4	NA	NA	NA	NA	NA	NA	NA	NA	NA	NA	NA	NA	NA
NA	MTR	NA	NA	NA	NA	NA	NA	NA	NA	NA	NA	NA	NA	NA
NA	MTRF1	NA	NA	NA	NA	NA	NA	NA	NA	NA	NA	NA	NA	NA
NA	MTRR	NA	NA	NA	NA	NA	NA	NA	NA	NA	NA	NA	NA	NA
NA	MTSS1L	NA	NA	NA	NA	NA	NA	NA	NA	NA	NA	NA	NA	NA
NA	MXD3	NA	NA	NA	NA	NA	NA	NA	NA	NA	NA	NA	NA	NA
NA	MYB	NA	NA	NA	NA	NA	NA	NA	NA	NA	NA	NA	NA	NA
NA	MYBBP1A	NA	NA	NA	NA	NA	NA	NA	NA	NA	NA	NA	NA	NA
NA	MYBL2	NA	NA	NA	NA	NA	NA	NA	NA	NA	NA	NA	NA	NA
NA	MYH10	NA	NA	NA	NA	NA	NA	NA	NA	NA	NA	NA	NA	NA
NA	MYNN	NA	NA	NA	NA	NA	NA	NA	NA	NA	NA	NA	NA	NA
NA	MYO19	NA	NA	NA	NA	NA	NA	NA	NA	NA	NA	NA	NA	NA
NA	MYPN	NA	NA	NA	NA	NA	NA	NA	NA	NA	NA	NA	NA	NA
NA	N4BP2	NA	NA	NA	NA	NA	NA	NA	NA	NA	NA	NA	NA	NA
NA	N6AMT1	NA	NA	NA	NA	NA	NA	NA	NA	NA	NA	NA	NA	NA
NA	NAA15	NA	NA	NA	NA	NA	NA	NA	NA	NA	NA	NA	NA	NA
NA	NAA16	NA	NA	NA	NA	NA	NA	NA	NA	NA	NA	NA	NA	NA
NA	NAA25	NA	NA	NA	NA	NA	NA	NA	NA	NA	NA	NA	NA	NA
NA	NAA50	NA	NA	NA	NA	NA	NA	NA	NA	NA	NA	NA	NA	NA
NA	NAB2	NA	NA	NA	NA	NA	NA	NA	NA	NA	NA	NA	NA	NA
NA	NACA	NA	NA	NA	NA	NA	NA	NA	NA	NA	NA	NA	NA	NA
NA	NAF1	NA	NA	NA	NA	NA	NA	NA	NA	NA	NA	NA	NA	NA
NA	NAGA	NA	NA	NA	NA	NA	NA	NA	NA	NA	NA	NA	NA	NA
NA	NAP1L4	NA	NA	NA	NA	NA	NA	NA	NA	NA	NA	NA	NA	NA
NA	NAPEPLD	NA	NA	NA	NA	NA	NA	NA	NA	NA	NA	NA	NA	NA
NA	NARS2	NA	NA	NA	NA	NA	NA	NA	NA	NA	NA	NA	NA	NA
NA	NASP	NA	NA	NA	NA	NA	NA	NA	NA	NA	NA	NA	NA	NA
NA	NAT10	NA	NA	NA	NA	NA	NA	NA	NA	NA	NA	NA	NA	NA
NA	NAV2	NA	NA	NA	NA	NA	NA	NA	NA	NA	NA	NA	NA	NA
NA	NBN	NA	NA	NA	NA	NA	NA	NA	NA	NA	NA	NA	NA	NA
NA	NBPF3	NA	NA	NA	NA	NA	NA	NA	NA	NA	NA	NA	NA	NA
NA	NCAPD2	NA	NA	NA	NA	NA	NA	NA	NA	NA	NA	NA	NA	NA
NA	NCAPD3	NA	NA	NA	NA	NA	NA	NA	NA	NA	NA	NA	NA	NA
NA	NCAPG	NA	NA	NA	NA	NA	NA	NA	NA	NA	NA	NA	NA	NA
NA	NCAPG2	NA	NA	NA	NA	NA	NA	NA	NA	NA	NA	NA	NA	NA
NA	NCAPH	NA	NA	NA	NA	NA	NA	NA	NA	NA	NA	NA	NA	NA
NA	NCAPH2	NA	NA	NA	NA	NA	NA	NA	NA	NA	NA	NA	NA	NA
NA	NCBP1	NA	NA	NA	NA	NA	NA	NA	NA	NA	NA	NA	NA	NA
NA	NCL	NA	NA	NA	NA	NA	NA	NA	NA	NA	NA	NA	NA	NA
NA	NCOA5	NA	NA	NA	NA	NA	NA	NA	NA	NA	NA	NA	NA	NA
NA	NCOA6	NA	NA	NA	NA	NA	NA	NA	NA	NA	NA	NA	NA	NA
NA	NDC80	NA	NA	NA	NA	NA	NA	NA	NA	NA	NA	NA	NA	NA
NA	NDE1	NA	NA	NA	NA	NA	NA	NA	NA	NA	NA	NA	NA	NA
NA	NDP	NA	NA	NA	NA	NA	NA	NA	NA	NA	NA	NA	NA	NA
NA	NDUFA9	NA	NA	NA	NA	NA	NA	NA	NA	NA	NA	NA	NA	NA
NA	NDUFAF4	NA	NA	NA	NA	NA	NA	NA	NA	NA	NA	NA	NA	NA
NA	NEDD1	NA	NA	NA	NA	NA	NA	NA	NA	NA	NA	NA	NA	NA
NA	NEFH	NA	NA	NA	NA	NA	NA	NA	NA	NA	NA	NA	NA	NA
NA	NEIL3	NA	NA	NA	NA	NA	NA	NA	NA	NA	NA	NA	NA	NA
NA	NEK2	NA	NA	NA	NA	NA	NA	NA	NA	NA	NA	NA	NA	NA
NA	NEK4	NA	NA	NA	NA	NA	NA	NA	NA	NA	NA	NA	NA	NA
NA	NETO2	NA	NA	NA	NA	NA	NA	NA	NA	NA	NA	NA	NA	NA
NA	NFATC3	NA	NA	NA	NA	NA	NA	NA	NA	NA	NA	NA	NA	NA
NA	NFE2L2	NA	NA	NA	NA	NA	NA	NA	NA	NA	NA	NA	NA	NA
NA	NFIA	NA	NA	NA	NA	NA	NA	NA	NA	NA	NA	NA	NA	NA
NA	NFIB	NA	NA	NA	NA	NA	NA	NA	NA	NA	NA	NA	NA	NA
NA	NFIC	NA	NA	NA	NA	NA	NA	NA	NA	NA	NA	NA	NA	NA
NA	NFIL3	NA	NA	NA	NA	NA	NA	NA	NA	NA	NA	NA	NA	NA
NA	NFIX	NA	NA	NA	NA	NA	NA	NA	NA	NA	NA	NA	NA	NA
NA	NFKBID	NA	NA	NA	NA	NA	NA	NA	NA	NA	NA	NA	NA	NA
NA	NFRKB	NA	NA	NA	NA	NA	NA	NA	NA	NA	NA	NA	NA	NA
NA	NFX1	NA	NA	NA	NA	NA	NA	NA	NA	NA	NA	NA	NA	NA
NA	NFYA	NA	NA	NA	NA	NA	NA	NA	NA	NA	NA	NA	NA	NA
NA	NFYB	NA	NA	NA	NA	NA	NA	NA	NA	NA	NA	NA	NA	NA
NA	NFYC	NA	NA	NA	NA	NA	NA	NA	NA	NA	NA	NA	NA	NA
NA	NHEJ1	NA	NA	NA	NA	NA	NA	NA	NA	NA	NA	NA	NA	NA
NA	NHLRC3	NA	NA	NA	NA	NA	NA	NA	NA	NA	NA	NA	NA	NA
NA	NHP2	NA	NA	NA	NA	NA	NA	NA	NA	NA	NA	NA	NA	NA
NA	NHSL1	NA	NA	NA	NA	NA	NA	NA	NA	NA	NA	NA	NA	NA
NA	NID1	NA	NA	NA	NA	NA	NA	NA	NA	NA	NA	NA	NA	NA
NA	NID2	NA	NA	NA	NA	NA	NA	NA	NA	NA	NA	NA	NA	NA
NA	NIF3L1	NA	NA	NA	NA	NA	NA	NA	NA	NA	NA	NA	NA	NA
NA	NIN	NA	NA	NA	NA	NA	NA	NA	NA	NA	NA	NA	NA	NA
NA	NIP7	NA	NA	NA	NA	NA	NA	NA	NA	NA	NA	NA	NA	NA
NA	NKAPL	NA	NA	NA	NA	NA	NA	NA	NA	NA	NA	NA	NA	NA
NA	NKRF	NA	NA	NA	NA	NA	NA	NA	NA	NA	NA	NA	NA	NA
NA	NLE1	NA	NA	NA	NA	NA	NA	NA	NA	NA	NA	NA	NA	NA
NA	NLN	NA	NA	NA	NA	NA	NA	NA	NA	NA	NA	NA	NA	NA
NA	NNAT	NA	NA	NA	NA	NA	NA	NA	NA	NA	NA	NA	NA	NA
NA	NOB1	NA	NA	NA	NA	NA	NA	NA	NA	NA	NA	NA	NA	NA
NA	NOC2L	NA	NA	NA	NA	NA	NA	NA	NA	NA	NA	NA	NA	NA
NA	NOC3L	NA	NA	NA	NA	NA	NA	NA	NA	NA	NA	NA	NA	NA
NA	NOC4L	NA	NA	NA	NA	NA	NA	NA	NA	NA	NA	NA	NA	NA
NA	NOD1	NA	NA	NA	NA	NA	NA	NA	NA	NA	NA	NA	NA	NA
NA	NOL11	NA	NA	NA	NA	NA	NA	NA	NA	NA	NA	NA	NA	NA
NA	NOL12	NA	NA	NA	NA	NA	NA	NA	NA	NA	NA	NA	NA	NA
NA	NOL6	NA	NA	NA	NA	NA	NA	NA	NA	NA	NA	NA	NA	NA
NA	NOL8	NA	NA	NA	NA	NA	NA	NA	NA	NA	NA	NA	NA	NA
NA	NOL9	NA	NA	NA	NA	NA	NA	NA	NA	NA	NA	NA	NA	NA
NA	NOLC1	NA	NA	NA	NA	NA	NA	NA	NA	NA	NA	NA	NA	NA
NA	NONO	NA	NA	NA	NA	NA	NA	NA	NA	NA	NA	NA	NA	NA
NA	NOP16	NA	NA	NA	NA	NA	NA	NA	NA	NA	NA	NA	NA	NA
NA	NOP2	NA	NA	NA	NA	NA	NA	NA	NA	NA	NA	NA	NA	NA
NA	NOP58	NA	NA	NA	NA	NA	NA	NA	NA	NA	NA	NA	NA	NA
NA	NOV	NA	NA	NA	NA	NA	NA	NA	NA	NA	NA	NA	NA	NA
NA	NOVA1	NA	NA	NA	NA	NA	NA	NA	NA	NA	NA	NA	NA	NA
NA	NPAT	NA	NA	NA	NA	NA	NA	NA	NA	NA	NA	NA	NA	NA
NA	NPM1	NA	NA	NA	NA	NA	NA	NA	NA	NA	NA	NA	NA	NA
NA	NPM3	NA	NA	NA	NA	NA	NA	NA	NA	NA	NA	NA	NA	NA
NA	NPR3	NA	NA	NA	NA	NA	NA	NA	NA	NA	NA	NA	NA	NA
NA	NPRL3	NA	NA	NA	NA	NA	NA	NA	NA	NA	NA	NA	NA	NA
NA	NPTX1	NA	NA	NA	NA	NA	NA	NA	NA	NA	NA	NA	NA	NA
NA	NQO1	NA	NA	NA	NA	NA	NA	NA	NA	NA	NA	NA	NA	NA
NA	NQO2	NA	NA	NA	NA	NA	NA	NA	NA	NA	NA	NA	NA	NA
NA	NR1D2	NA	NA	NA	NA	NA	NA	NA	NA	NA	NA	NA	NA	NA
NA	NR2C2	NA	NA	NA	NA	NA	NA	NA	NA	NA	NA	NA	NA	NA
NA	NR2C2AP	NA	NA	NA	NA	NA	NA	NA	NA	NA	NA	NA	NA	NA
NA	NR2F1	NA	NA	NA	NA	NA	NA	NA	NA	NA	NA	NA	NA	NA
NA	NR4A1	NA	NA	NA	NA	NA	NA	NA	NA	NA	NA	NA	NA	NA
NA	NR4A2	NA	NA	NA	NA	NA	NA	NA	NA	NA	NA	NA	NA	NA
NA	NRF1	NA	NA	NA	NA	NA	NA	NA	NA	NA	NA	NA	NA	NA
NA	NRGN	NA	NA	NA	NA	NA	NA	NA	NA	NA	NA	NA	NA	NA
NA	NRIP1	NA	NA	NA	NA	NA	NA	NA	NA	NA	NA	NA	NA	NA
NA	NRM	NA	NA	NA	NA	NA	NA	NA	NA	NA	NA	NA	NA	NA
NA	NRP1	NA	NA	NA	NA	NA	NA	NA	NA	NA	NA	NA	NA	NA
NA	NRP2	NA	NA	NA	NA	NA	NA	NA	NA	NA	NA	NA	NA	NA
NA	NSD1	NA	NA	NA	NA	NA	NA	NA	NA	NA	NA	NA	NA	NA
NA	NSL1	NA	NA	NA	NA	NA	NA	NA	NA	NA	NA	NA	NA	NA
NA	NSMAF	NA	NA	NA	NA	NA	NA	NA	NA	NA	NA	NA	NA	NA
NA	NSMCE2	NA	NA	NA	NA	NA	NA	NA	NA	NA	NA	NA	NA	NA
NA	NSMCE4A	NA	NA	NA	NA	NA	NA	NA	NA	NA	NA	NA	NA	NA
NA	NSUN3	NA	NA	NA	NA	NA	NA	NA	NA	NA	NA	NA	NA	NA
NA	NSUN4	NA	NA	NA	NA	NA	NA	NA	NA	NA	NA	NA	NA	NA
NA	NSUN6	NA	NA	NA	NA	NA	NA	NA	NA	NA	NA	NA	NA	NA
NA	NT5DC2	NA	NA	NA	NA	NA	NA	NA	NA	NA	NA	NA	NA	NA
NA	NUBP1	NA	NA	NA	NA	NA	NA	NA	NA	NA	NA	NA	NA	NA
NA	NUBPL	NA	NA	NA	NA	NA	NA	NA	NA	NA	NA	NA	NA	NA
NA	NUCKS1	NA	NA	NA	NA	NA	NA	NA	NA	NA	NA	NA	NA	NA
NA	NUDC	NA	NA	NA	NA	NA	NA	NA	NA	NA	NA	NA	NA	NA
NA	NUDCD2	NA	NA	NA	NA	NA	NA	NA	NA	NA	NA	NA	NA	NA
NA	NUDT11	NA	NA	NA	NA	NA	NA	NA	NA	NA	NA	NA	NA	NA
NA	NUDT12	NA	NA	NA	NA	NA	NA	NA	NA	NA	NA	NA	NA	NA
NA	NUDT13	NA	NA	NA	NA	NA	NA	NA	NA	NA	NA	NA	NA	NA
NA	NUDT15	NA	NA	NA	NA	NA	NA	NA	NA	NA	NA	NA	NA	NA
NA	NUDT2	NA	NA	NA	NA	NA	NA	NA	NA	NA	NA	NA	NA	NA
NA	NUDT21	NA	NA	NA	NA	NA	NA	NA	NA	NA	NA	NA	NA	NA
NA	NUF2	NA	NA	NA	NA	NA	NA	NA	NA	NA	NA	NA	NA	NA
NA	NUFIP1	NA	NA	NA	NA	NA	NA	NA	NA	NA	NA	NA	NA	NA
NA	NUMA1	NA	NA	NA	NA	NA	NA	NA	NA	NA	NA	NA	NA	NA
NA	NUP107	NA	NA	NA	NA	NA	NA	NA	NA	NA	NA	NA	NA	NA
NA	NUP133	NA	NA	NA	NA	NA	NA	NA	NA	NA	NA	NA	NA	NA
NA	NUP153	NA	NA	NA	NA	NA	NA	NA	NA	NA	NA	NA	NA	NA
NA	NUP155	NA	NA	NA	NA	NA	NA	NA	NA	NA	NA	NA	NA	NA
NA	NUP160	NA	NA	NA	NA	NA	NA	NA	NA	NA	NA	NA	NA	NA
NA	NUP188	NA	NA	NA	NA	NA	NA	NA	NA	NA	NA	NA	NA	NA
NA	NUP205	NA	NA	NA	NA	NA	NA	NA	NA	NA	NA	NA	NA	NA
NA	NUP214	NA	NA	NA	NA	NA	NA	NA	NA	NA	NA	NA	NA	NA
NA	NUP35	NA	NA	NA	NA	NA	NA	NA	NA	NA	NA	NA	NA	NA
NA	NUP37	NA	NA	NA	NA	NA	NA	NA	NA	NA	NA	NA	NA	NA
NA	NUP43	NA	NA	NA	NA	NA	NA	NA	NA	NA	NA	NA	NA	NA
NA	NUP50	NA	NA	NA	NA	NA	NA	NA	NA	NA	NA	NA	NA	NA
NA	NUP54	NA	NA	NA	NA	NA	NA	NA	NA	NA	NA	NA	NA	NA
NA	NUP85	NA	NA	NA	NA	NA	NA	NA	NA	NA	NA	NA	NA	NA
NA	NUP88	NA	NA	NA	NA	NA	NA	NA	NA	NA	NA	NA	NA	NA
NA	NUP93	NA	NA	NA	NA	NA	NA	NA	NA	NA	NA	NA	NA	NA
NA	NUP98	NA	NA	NA	NA	NA	NA	NA	NA	NA	NA	NA	NA	NA
NA	NUSAP1	NA	NA	NA	NA	NA	NA	NA	NA	NA	NA	NA	NA	NA
NA	NVL	NA	NA	NA	NA	NA	NA	NA	NA	NA	NA	NA	NA	NA
NA	NXT2	NA	NA	NA	NA	NA	NA	NA	NA	NA	NA	NA	NA	NA
NA	OAS3	NA	NA	NA	NA	NA	NA	NA	NA	NA	NA	NA	NA	NA
NA	OCLM	NA	NA	NA	NA	NA	NA	NA	NA	NA	NA	NA	NA	NA
NA	ODC1	NA	NA	NA	NA	NA	NA	NA	NA	NA	NA	NA	NA	NA
NA	ODF2	NA	NA	NA	NA	NA	NA	NA	NA	NA	NA	NA	NA	NA
NA	OGG1	NA	NA	NA	NA	NA	NA	NA	NA	NA	NA	NA	NA	NA
NA	OIP5	NA	NA	NA	NA	NA	NA	NA	NA	NA	NA	NA	NA	NA
NA	OLFML2B	NA	NA	NA	NA	NA	NA	NA	NA	NA	NA	NA	NA	NA
NA	OLFML3	NA	NA	NA	NA	NA	NA	NA	NA	NA	NA	NA	NA	NA
NA	ORC1	NA	NA	NA	NA	NA	NA	NA	NA	NA	NA	NA	NA	NA
NA	ORC2	NA	NA	NA	NA	NA	NA	NA	NA	NA	NA	NA	NA	NA
NA	ORC5	NA	NA	NA	NA	NA	NA	NA	NA	NA	NA	NA	NA	NA
NA	ORC6	NA	NA	NA	NA	NA	NA	NA	NA	NA	NA	NA	NA	NA
NA	OSBPL9	NA	NA	NA	NA	NA	NA	NA	NA	NA	NA	NA	NA	NA
NA	OSGEPL1	NA	NA	NA	NA	NA	NA	NA	NA	NA	NA	NA	NA	NA
NA	OXNAD1	NA	NA	NA	NA	NA	NA	NA	NA	NA	NA	NA	NA	NA
NA	PA2G4	NA	NA	NA	NA	NA	NA	NA	NA	NA	NA	NA	NA	NA
NA	PACRGL	NA	NA	NA	NA	NA	NA	NA	NA	NA	NA	NA	NA	NA
NA	PAFAH1B3	NA	NA	NA	NA	NA	NA	NA	NA	NA	NA	NA	NA	NA
NA	PAICS	NA	NA	NA	NA	NA	NA	NA	NA	NA	NA	NA	NA	NA
NA	PAK1IP1	NA	NA	NA	NA	NA	NA	NA	NA	NA	NA	NA	NA	NA
NA	PAK3	NA	NA	NA	NA	NA	NA	NA	NA	NA	NA	NA	NA	NA
NA	PAK4	NA	NA	NA	NA	NA	NA	NA	NA	NA	NA	NA	NA	NA
NA	PALB2	NA	NA	NA	NA	NA	NA	NA	NA	NA	NA	NA	NA	NA
NA	PAN2	NA	NA	NA	NA	NA	NA	NA	NA	NA	NA	NA	NA	NA
NA	PAN3	NA	NA	NA	NA	NA	NA	NA	NA	NA	NA	NA	NA	NA
NA	PAQR4	NA	NA	NA	NA	NA	NA	NA	NA	NA	NA	NA	NA	NA
NA	PAQR5	NA	NA	NA	NA	NA	NA	NA	NA	NA	NA	NA	NA	NA
NA	PARN	NA	NA	NA	NA	NA	NA	NA	NA	NA	NA	NA	NA	NA
NA	PARP1	NA	NA	NA	NA	NA	NA	NA	NA	NA	NA	NA	NA	NA
NA	PARP2	NA	NA	NA	NA	NA	NA	NA	NA	NA	NA	NA	NA	NA
NA	PARP9	NA	NA	NA	NA	NA	NA	NA	NA	NA	NA	NA	NA	NA
NA	PASK	NA	NA	NA	NA	NA	NA	NA	NA	NA	NA	NA	NA	NA
NA	PATL1	NA	NA	NA	NA	NA	NA	NA	NA	NA	NA	NA	NA	NA
NA	PATZ1	NA	NA	NA	NA	NA	NA	NA	NA	NA	NA	NA	NA	NA
NA	PAXIP1	NA	NA	NA	NA	NA	NA	NA	NA	NA	NA	NA	NA	NA
NA	PBK	NA	NA	NA	NA	NA	NA	NA	NA	NA	NA	NA	NA	NA
NA	PBRM1	NA	NA	NA	NA	NA	NA	NA	NA	NA	NA	NA	NA	NA
NA	PBX1	NA	NA	NA	NA	NA	NA	NA	NA	NA	NA	NA	NA	NA
NA	PBX3	NA	NA	NA	NA	NA	NA	NA	NA	NA	NA	NA	NA	NA
NA	PCBP1	NA	NA	NA	NA	NA	NA	NA	NA	NA	NA	NA	NA	NA
NA	PCCA	NA	NA	NA	NA	NA	NA	NA	NA	NA	NA	NA	NA	NA
NA	PCDH18	NA	NA	NA	NA	NA	NA	NA	NA	NA	NA	NA	NA	NA
NA	PCF11	NA	NA	NA	NA	NA	NA	NA	NA	NA	NA	NA	NA	NA
NA	PCGF6	NA	NA	NA	NA	NA	NA	NA	NA	NA	NA	NA	NA	NA
NA	PCID2	NA	NA	NA	NA	NA	NA	NA	NA	NA	NA	NA	NA	NA
NA	PCIF1	NA	NA	NA	NA	NA	NA	NA	NA	NA	NA	NA	NA	NA
NA	PCM1	NA	NA	NA	NA	NA	NA	NA	NA	NA	NA	NA	NA	NA
NA	PCNA	NA	NA	NA	NA	NA	NA	NA	NA	NA	NA	NA	NA	NA
NA	PCNT	NA	NA	NA	NA	NA	NA	NA	NA	NA	NA	NA	NA	NA
NA	PCOLCE	NA	NA	NA	NA	NA	NA	NA	NA	NA	NA	NA	NA	NA
NA	PDCD11	NA	NA	NA	NA	NA	NA	NA	NA	NA	NA	NA	NA	NA
NA	PDE3B	NA	NA	NA	NA	NA	NA	NA	NA	NA	NA	NA	NA	NA
NA	PDE7A	NA	NA	NA	NA	NA	NA	NA	NA	NA	NA	NA	NA	NA
NA	PDE7B	NA	NA	NA	NA	NA	NA	NA	NA	NA	NA	NA	NA	NA
NA	PDGFD	NA	NA	NA	NA	NA	NA	NA	NA	NA	NA	NA	NA	NA
NA	PDGFRA	NA	NA	NA	NA	NA	NA	NA	NA	NA	NA	NA	NA	NA
NA	PDIA4	NA	NA	NA	NA	NA	NA	NA	NA	NA	NA	NA	NA	NA
NA	PDIK1L	NA	NA	NA	NA	NA	NA	NA	NA	NA	NA	NA	NA	NA
NA	PDP2	NA	NA	NA	NA	NA	NA	NA	NA	NA	NA	NA	NA	NA
NA	PDS5B	NA	NA	NA	NA	NA	NA	NA	NA	NA	NA	NA	NA	NA
NA	PDSS1	NA	NA	NA	NA	NA	NA	NA	NA	NA	NA	NA	NA	NA
NA	PDSS2	NA	NA	NA	NA	NA	NA	NA	NA	NA	NA	NA	NA	NA
NA	PDZRN3	NA	NA	NA	NA	NA	NA	NA	NA	NA	NA	NA	NA	NA
NA	PECR	NA	NA	NA	NA	NA	NA	NA	NA	NA	NA	NA	NA	NA
NA	PEG10	NA	NA	NA	NA	NA	NA	NA	NA	NA	NA	NA	NA	NA
NA	PELI1	NA	NA	NA	NA	NA	NA	NA	NA	NA	NA	NA	NA	NA
NA	PELI2	NA	NA	NA	NA	NA	NA	NA	NA	NA	NA	NA	NA	NA
NA	PELP1	NA	NA	NA	NA	NA	NA	NA	NA	NA	NA	NA	NA	NA
NA	PER2	NA	NA	NA	NA	NA	NA	NA	NA	NA	NA	NA	NA	NA
NA	PER3	NA	NA	NA	NA	NA	NA	NA	NA	NA	NA	NA	NA	NA
NA	PES1	NA	NA	NA	NA	NA	NA	NA	NA	NA	NA	NA	NA	NA
NA	PEX1	NA	NA	NA	NA	NA	NA	NA	NA	NA	NA	NA	NA	NA
NA	PEX12	NA	NA	NA	NA	NA	NA	NA	NA	NA	NA	NA	NA	NA
NA	PFAS	NA	NA	NA	NA	NA	NA	NA	NA	NA	NA	NA	NA	NA
NA	PFKM	NA	NA	NA	NA	NA	NA	NA	NA	NA	NA	NA	NA	NA
NA	PGBD1	NA	NA	NA	NA	NA	NA	NA	NA	NA	NA	NA	NA	NA
NA	PGBD2	NA	NA	NA	NA	NA	NA	NA	NA	NA	NA	NA	NA	NA
NA	PGD	NA	NA	NA	NA	NA	NA	NA	NA	NA	NA	NA	NA	NA
NA	PHACTR4	NA	NA	NA	NA	NA	NA	NA	NA	NA	NA	NA	NA	NA
NA	PHB2	NA	NA	NA	NA	NA	NA	NA	NA	NA	NA	NA	NA	NA
NA	PHC1	NA	NA	NA	NA	NA	NA	NA	NA	NA	NA	NA	NA	NA
NA	PHF14	NA	NA	NA	NA	NA	NA	NA	NA	NA	NA	NA	NA	NA
NA	PHF19	NA	NA	NA	NA	NA	NA	NA	NA	NA	NA	NA	NA	NA
NA	PHF2	NA	NA	NA	NA	NA	NA	NA	NA	NA	NA	NA	NA	NA
NA	PHF3	NA	NA	NA	NA	NA	NA	NA	NA	NA	NA	NA	NA	NA
NA	PHF5A	NA	NA	NA	NA	NA	NA	NA	NA	NA	NA	NA	NA	NA
NA	PHF6	NA	NA	NA	NA	NA	NA	NA	NA	NA	NA	NA	NA	NA
NA	PHF7	NA	NA	NA	NA	NA	NA	NA	NA	NA	NA	NA	NA	NA
NA	PHGDH	NA	NA	NA	NA	NA	NA	NA	NA	NA	NA	NA	NA	NA
NA	PHIP	NA	NA	NA	NA	NA	NA	NA	NA	NA	NA	NA	NA	NA
NA	PHKA2	NA	NA	NA	NA	NA	NA	NA	NA	NA	NA	NA	NA	NA
NA	PHLDA1	NA	NA	NA	NA	NA	NA	NA	NA	NA	NA	NA	NA	NA
NA	PHLPP1	NA	NA	NA	NA	NA	NA	NA	NA	NA	NA	NA	NA	NA
NA	PHLPP2	NA	NA	NA	NA	NA	NA	NA	NA	NA	NA	NA	NA	NA
NA	PIGC	NA	NA	NA	NA	NA	NA	NA	NA	NA	NA	NA	NA	NA
NA	PIGW	NA	NA	NA	NA	NA	NA	NA	NA	NA	NA	NA	NA	NA
NA	PIGX	NA	NA	NA	NA	NA	NA	NA	NA	NA	NA	NA	NA	NA
NA	PIH1D2	NA	NA	NA	NA	NA	NA	NA	NA	NA	NA	NA	NA	NA
NA	PIK3R4	NA	NA	NA	NA	NA	NA	NA	NA	NA	NA	NA	NA	NA
NA	PIKFYVE	NA	NA	NA	NA	NA	NA	NA	NA	NA	NA	NA	NA	NA
NA	PIM1	NA	NA	NA	NA	NA	NA	NA	NA	NA	NA	NA	NA	NA
NA	PINX1	NA	NA	NA	NA	NA	NA	NA	NA	NA	NA	NA	NA	NA
NA	PIP4K2A	NA	NA	NA	NA	NA	NA	NA	NA	NA	NA	NA	NA	NA
NA	PITPNB	NA	NA	NA	NA	NA	NA	NA	NA	NA	NA	NA	NA	NA
NA	PITPNM2	NA	NA	NA	NA	NA	NA	NA	NA	NA	NA	NA	NA	NA
NA	PKDCC	NA	NA	NA	NA	NA	NA	NA	NA	NA	NA	NA	NA	NA
NA	PKMYT1	NA	NA	NA	NA	NA	NA	NA	NA	NA	NA	NA	NA	NA
NA	PKN3	NA	NA	NA	NA	NA	NA	NA	NA	NA	NA	NA	NA	NA
NA	PLA2G4A	NA	NA	NA	NA	NA	NA	NA	NA	NA	NA	NA	NA	NA
NA	PLAGL2	NA	NA	NA	NA	NA	NA	NA	NA	NA	NA	NA	NA	NA
NA	PLCB1	NA	NA	NA	NA	NA	NA	NA	NA	NA	NA	NA	NA	NA
NA	PLCG1	NA	NA	NA	NA	NA	NA	NA	NA	NA	NA	NA	NA	NA
NA	PLCXD1	NA	NA	NA	NA	NA	NA	NA	NA	NA	NA	NA	NA	NA
NA	PLEKHA5	NA	NA	NA	NA	NA	NA	NA	NA	NA	NA	NA	NA	NA
NA	PLEKHG4	NA	NA	NA	NA	NA	NA	NA	NA	NA	NA	NA	NA	NA
NA	PLEKHG4B	NA	NA	NA	NA	NA	NA	NA	NA	NA	NA	NA	NA	NA
NA	PLEKHO1	NA	NA	NA	NA	NA	NA	NA	NA	NA	NA	NA	NA	NA
NA	PLK1	NA	NA	NA	NA	NA	NA	NA	NA	NA	NA	NA	NA	NA
NA	PLK4	NA	NA	NA	NA	NA	NA	NA	NA	NA	NA	NA	NA	NA
NA	PLRG1	NA	NA	NA	NA	NA	NA	NA	NA	NA	NA	NA	NA	NA
NA	PLSCR1	NA	NA	NA	NA	NA	NA	NA	NA	NA	NA	NA	NA	NA
NA	PM20D2	NA	NA	NA	NA	NA	NA	NA	NA	NA	NA	NA	NA	NA
NA	PMS1	NA	NA	NA	NA	NA	NA	NA	NA	NA	NA	NA	NA	NA
NA	PNMA1	NA	NA	NA	NA	NA	NA	NA	NA	NA	NA	NA	NA	NA
NA	PNN	NA	NA	NA	NA	NA	NA	NA	NA	NA	NA	NA	NA	NA
NA	PNPT1	NA	NA	NA	NA	NA	NA	NA	NA	NA	NA	NA	NA	NA
NA	POC1A	NA	NA	NA	NA	NA	NA	NA	NA	NA	NA	NA	NA	NA
NA	POC5	NA	NA	NA	NA	NA	NA	NA	NA	NA	NA	NA	NA	NA
NA	POGK	NA	NA	NA	NA	NA	NA	NA	NA	NA	NA	NA	NA	NA
NA	POGZ	NA	NA	NA	NA	NA	NA	NA	NA	NA	NA	NA	NA	NA
NA	POLA1	NA	NA	NA	NA	NA	NA	NA	NA	NA	NA	NA	NA	NA
NA	POLA2	NA	NA	NA	NA	NA	NA	NA	NA	NA	NA	NA	NA	NA
NA	POLD1	NA	NA	NA	NA	NA	NA	NA	NA	NA	NA	NA	NA	NA
NA	POLD2	NA	NA	NA	NA	NA	NA	NA	NA	NA	NA	NA	NA	NA
NA	POLD3	NA	NA	NA	NA	NA	NA	NA	NA	NA	NA	NA	NA	NA
NA	POLDIP3	NA	NA	NA	NA	NA	NA	NA	NA	NA	NA	NA	NA	NA
NA	POLE	NA	NA	NA	NA	NA	NA	NA	NA	NA	NA	NA	NA	NA
NA	POLE2	NA	NA	NA	NA	NA	NA	NA	NA	NA	NA	NA	NA	NA
NA	POLG2	NA	NA	NA	NA	NA	NA	NA	NA	NA	NA	NA	NA	NA
NA	POLQ	NA	NA	NA	NA	NA	NA	NA	NA	NA	NA	NA	NA	NA
NA	POLR1A	NA	NA	NA	NA	NA	NA	NA	NA	NA	NA	NA	NA	NA
NA	POLR1B	NA	NA	NA	NA	NA	NA	NA	NA	NA	NA	NA	NA	NA
NA	POLR1C	NA	NA	NA	NA	NA	NA	NA	NA	NA	NA	NA	NA	NA
NA	POLR1E	NA	NA	NA	NA	NA	NA	NA	NA	NA	NA	NA	NA	NA
NA	POLR2B	NA	NA	NA	NA	NA	NA	NA	NA	NA	NA	NA	NA	NA
NA	POLR2C	NA	NA	NA	NA	NA	NA	NA	NA	NA	NA	NA	NA	NA
NA	POLR2D	NA	NA	NA	NA	NA	NA	NA	NA	NA	NA	NA	NA	NA
NA	POP1	NA	NA	NA	NA	NA	NA	NA	NA	NA	NA	NA	NA	NA
NA	POP5	NA	NA	NA	NA	NA	NA	NA	NA	NA	NA	NA	NA	NA
NA	POP7	NA	NA	NA	NA	NA	NA	NA	NA	NA	NA	NA	NA	NA
NA	POSTN	NA	NA	NA	NA	NA	NA	NA	NA	NA	NA	NA	NA	NA
NA	POT1	NA	NA	NA	NA	NA	NA	NA	NA	NA	NA	NA	NA	NA
NA	POU6F1	NA	NA	NA	NA	NA	NA	NA	NA	NA	NA	NA	NA	NA
NA	PPARD	NA	NA	NA	NA	NA	NA	NA	NA	NA	NA	NA	NA	NA
NA	PPARG	NA	NA	NA	NA	NA	NA	NA	NA	NA	NA	NA	NA	NA
NA	PPAT	NA	NA	NA	NA	NA	NA	NA	NA	NA	NA	NA	NA	NA
NA	PPID	NA	NA	NA	NA	NA	NA	NA	NA	NA	NA	NA	NA	NA
NA	PPIF	NA	NA	NA	NA	NA	NA	NA	NA	NA	NA	NA	NA	NA
NA	PPIG	NA	NA	NA	NA	NA	NA	NA	NA	NA	NA	NA	NA	NA
NA	PPIH	NA	NA	NA	NA	NA	NA	NA	NA	NA	NA	NA	NA	NA
NA	PPIL1	NA	NA	NA	NA	NA	NA	NA	NA	NA	NA	NA	NA	NA
NA	PPIL3	NA	NA	NA	NA	NA	NA	NA	NA	NA	NA	NA	NA	NA
NA	PPM1B	NA	NA	NA	NA	NA	NA	NA	NA	NA	NA	NA	NA	NA
NA	PPM1G	NA	NA	NA	NA	NA	NA	NA	NA	NA	NA	NA	NA	NA
NA	PPP1CC	NA	NA	NA	NA	NA	NA	NA	NA	NA	NA	NA	NA	NA
NA	PPP1R8	NA	NA	NA	NA	NA	NA	NA	NA	NA	NA	NA	NA	NA
NA	PPP2R3A	NA	NA	NA	NA	NA	NA	NA	NA	NA	NA	NA	NA	NA
NA	PPP2R5D	NA	NA	NA	NA	NA	NA	NA	NA	NA	NA	NA	NA	NA
NA	PPP5C	NA	NA	NA	NA	NA	NA	NA	NA	NA	NA	NA	NA	NA
NA	PPRC1	NA	NA	NA	NA	NA	NA	NA	NA	NA	NA	NA	NA	NA
NA	PPT1	NA	NA	NA	NA	NA	NA	NA	NA	NA	NA	NA	NA	NA
NA	PPWD1	NA	NA	NA	NA	NA	NA	NA	NA	NA	NA	NA	NA	NA
NA	PRC1	NA	NA	NA	NA	NA	NA	NA	NA	NA	NA	NA	NA	NA
NA	PRDM10	NA	NA	NA	NA	NA	NA	NA	NA	NA	NA	NA	NA	NA
NA	PRDM2	NA	NA	NA	NA	NA	NA	NA	NA	NA	NA	NA	NA	NA
NA	PRDM4	NA	NA	NA	NA	NA	NA	NA	NA	NA	NA	NA	NA	NA
NA	PRDM5	NA	NA	NA	NA	NA	NA	NA	NA	NA	NA	NA	NA	NA
NA	PRDM6	NA	NA	NA	NA	NA	NA	NA	NA	NA	NA	NA	NA	NA
NA	PRDM8	NA	NA	NA	NA	NA	NA	NA	NA	NA	NA	NA	NA	NA
NA	PRELID1	NA	NA	NA	NA	NA	NA	NA	NA	NA	NA	NA	NA	NA
NA	PRIM1	NA	NA	NA	NA	NA	NA	NA	NA	NA	NA	NA	NA	NA
NA	PRIM2	NA	NA	NA	NA	NA	NA	NA	NA	NA	NA	NA	NA	NA
NA	PRKAR2B	NA	NA	NA	NA	NA	NA	NA	NA	NA	NA	NA	NA	NA
NA	PRKCA	NA	NA	NA	NA	NA	NA	NA	NA	NA	NA	NA	NA	NA
NA	PRKD3	NA	NA	NA	NA	NA	NA	NA	NA	NA	NA	NA	NA	NA
NA	PRKDC	NA	NA	NA	NA	NA	NA	NA	NA	NA	NA	NA	NA	NA
NA	PRMT1	NA	NA	NA	NA	NA	NA	NA	NA	NA	NA	NA	NA	NA
NA	PRMT3	NA	NA	NA	NA	NA	NA	NA	NA	NA	NA	NA	NA	NA
NA	PRMT6	NA	NA	NA	NA	NA	NA	NA	NA	NA	NA	NA	NA	NA
NA	PRMT7	NA	NA	NA	NA	NA	NA	NA	NA	NA	NA	NA	NA	NA
NA	PRPF19	NA	NA	NA	NA	NA	NA	NA	NA	NA	NA	NA	NA	NA
NA	PRPF3	NA	NA	NA	NA	NA	NA	NA	NA	NA	NA	NA	NA	NA
NA	PRPF31	NA	NA	NA	NA	NA	NA	NA	NA	NA	NA	NA	NA	NA
NA	PRPF38A	NA	NA	NA	NA	NA	NA	NA	NA	NA	NA	NA	NA	NA
NA	PRPF38B	NA	NA	NA	NA	NA	NA	NA	NA	NA	NA	NA	NA	NA
NA	PRPF4	NA	NA	NA	NA	NA	NA	NA	NA	NA	NA	NA	NA	NA
NA	PRPF40A	NA	NA	NA	NA	NA	NA	NA	NA	NA	NA	NA	NA	NA
NA	PRPF8	NA	NA	NA	NA	NA	NA	NA	NA	NA	NA	NA	NA	NA
NA	PRPH2	NA	NA	NA	NA	NA	NA	NA	NA	NA	NA	NA	NA	NA
NA	PRPS2	NA	NA	NA	NA	NA	NA	NA	NA	NA	NA	NA	NA	NA
NA	PRR11	NA	NA	NA	NA	NA	NA	NA	NA	NA	NA	NA	NA	NA
NA	PRR12	NA	NA	NA	NA	NA	NA	NA	NA	NA	NA	NA	NA	NA
NA	PRR14	NA	NA	NA	NA	NA	NA	NA	NA	NA	NA	NA	NA	NA
NA	PRR16	NA	NA	NA	NA	NA	NA	NA	NA	NA	NA	NA	NA	NA
NA	PRR3	NA	NA	NA	NA	NA	NA	NA	NA	NA	NA	NA	NA	NA
NA	PRRT2	NA	NA	NA	NA	NA	NA	NA	NA	NA	NA	NA	NA	NA
NA	PRRX1	NA	NA	NA	NA	NA	NA	NA	NA	NA	NA	NA	NA	NA
NA	PRSS12	NA	NA	NA	NA	NA	NA	NA	NA	NA	NA	NA	NA	NA
NA	PRTFDC1	NA	NA	NA	NA	NA	NA	NA	NA	NA	NA	NA	NA	NA
NA	PRTG	NA	NA	NA	NA	NA	NA	NA	NA	NA	NA	NA	NA	NA
NA	PSD3	NA	NA	NA	NA	NA	NA	NA	NA	NA	NA	NA	NA	NA
NA	PSIP1	NA	NA	NA	NA	NA	NA	NA	NA	NA	NA	NA	NA	NA
NA	PSMA4	NA	NA	NA	NA	NA	NA	NA	NA	NA	NA	NA	NA	NA
NA	PSMC3	NA	NA	NA	NA	NA	NA	NA	NA	NA	NA	NA	NA	NA
NA	PSMC3IP	NA	NA	NA	NA	NA	NA	NA	NA	NA	NA	NA	NA	NA
NA	PSMC6	NA	NA	NA	NA	NA	NA	NA	NA	NA	NA	NA	NA	NA
NA	PSMG2	NA	NA	NA	NA	NA	NA	NA	NA	NA	NA	NA	NA	NA
NA	PSPH	NA	NA	NA	NA	NA	NA	NA	NA	NA	NA	NA	NA	NA
NA	PSRC1	NA	NA	NA	NA	NA	NA	NA	NA	NA	NA	NA	NA	NA
NA	PTBP1	NA	NA	NA	NA	NA	NA	NA	NA	NA	NA	NA	NA	NA
NA	PTBP2	NA	NA	NA	NA	NA	NA	NA	NA	NA	NA	NA	NA	NA
NA	PTCD2	NA	NA	NA	NA	NA	NA	NA	NA	NA	NA	NA	NA	NA
NA	PTCD3	NA	NA	NA	NA	NA	NA	NA	NA	NA	NA	NA	NA	NA
NA	PTCH1	NA	NA	NA	NA	NA	NA	NA	NA	NA	NA	NA	NA	NA
NA	PTCH2	NA	NA	NA	NA	NA	NA	NA	NA	NA	NA	NA	NA	NA
NA	PTER	NA	NA	NA	NA	NA	NA	NA	NA	NA	NA	NA	NA	NA
NA	PTGER2	NA	NA	NA	NA	NA	NA	NA	NA	NA	NA	NA	NA	NA
NA	PTMA	NA	NA	NA	NA	NA	NA	NA	NA	NA	NA	NA	NA	NA
NA	PTN	NA	NA	NA	NA	NA	NA	NA	NA	NA	NA	NA	NA	NA
NA	PTPN18	NA	NA	NA	NA	NA	NA	NA	NA	NA	NA	NA	NA	NA
NA	PTPN2	NA	NA	NA	NA	NA	NA	NA	NA	NA	NA	NA	NA	NA
NA	PTPRN	NA	NA	NA	NA	NA	NA	NA	NA	NA	NA	NA	NA	NA
NA	PTX3	NA	NA	NA	NA	NA	NA	NA	NA	NA	NA	NA	NA	NA
NA	PUM2	NA	NA	NA	NA	NA	NA	NA	NA	NA	NA	NA	NA	NA
NA	PUS1	NA	NA	NA	NA	NA	NA	NA	NA	NA	NA	NA	NA	NA
NA	PUS7	NA	NA	NA	NA	NA	NA	NA	NA	NA	NA	NA	NA	NA
NA	PXK	NA	NA	NA	NA	NA	NA	NA	NA	NA	NA	NA	NA	NA
NA	PXMP2	NA	NA	NA	NA	NA	NA	NA	NA	NA	NA	NA	NA	NA
NA	PXMP4	NA	NA	NA	NA	NA	NA	NA	NA	NA	NA	NA	NA	NA
NA	PYGO1	NA	NA	NA	NA	NA	NA	NA	NA	NA	NA	NA	NA	NA
NA	PYGO2	NA	NA	NA	NA	NA	NA	NA	NA	NA	NA	NA	NA	NA
NA	QRICH1	NA	NA	NA	NA	NA	NA	NA	NA	NA	NA	NA	NA	NA
NA	QRSL1	NA	NA	NA	NA	NA	NA	NA	NA	NA	NA	NA	NA	NA
NA	QSER1	NA	NA	NA	NA	NA	NA	NA	NA	NA	NA	NA	NA	NA
NA	R3HDM1	NA	NA	NA	NA	NA	NA	NA	NA	NA	NA	NA	NA	NA
NA	R3HDM2	NA	NA	NA	NA	NA	NA	NA	NA	NA	NA	NA	NA	NA
NA	RAB38	NA	NA	NA	NA	NA	NA	NA	NA	NA	NA	NA	NA	NA
NA	RAB8B	NA	NA	NA	NA	NA	NA	NA	NA	NA	NA	NA	NA	NA
NA	RABGGTB	NA	NA	NA	NA	NA	NA	NA	NA	NA	NA	NA	NA	NA
NA	RABL3	NA	NA	NA	NA	NA	NA	NA	NA	NA	NA	NA	NA	NA
NA	RACGAP1	NA	NA	NA	NA	NA	NA	NA	NA	NA	NA	NA	NA	NA
NA	RAD1	NA	NA	NA	NA	NA	NA	NA	NA	NA	NA	NA	NA	NA
NA	RAD18	NA	NA	NA	NA	NA	NA	NA	NA	NA	NA	NA	NA	NA
NA	RAD21	NA	NA	NA	NA	NA	NA	NA	NA	NA	NA	NA	NA	NA
NA	RAD23A	NA	NA	NA	NA	NA	NA	NA	NA	NA	NA	NA	NA	NA
NA	RAD51	NA	NA	NA	NA	NA	NA	NA	NA	NA	NA	NA	NA	NA
NA	RAD51AP1	NA	NA	NA	NA	NA	NA	NA	NA	NA	NA	NA	NA	NA
NA	RAD51C	NA	NA	NA	NA	NA	NA	NA	NA	NA	NA	NA	NA	NA
NA	RAD54L	NA	NA	NA	NA	NA	NA	NA	NA	NA	NA	NA	NA	NA
NA	RAE1	NA	NA	NA	NA	NA	NA	NA	NA	NA	NA	NA	NA	NA
NA	RALGAPA2	NA	NA	NA	NA	NA	NA	NA	NA	NA	NA	NA	NA	NA
NA	RALGPS2	NA	NA	NA	NA	NA	NA	NA	NA	NA	NA	NA	NA	NA
NA	RANBP1	NA	NA	NA	NA	NA	NA	NA	NA	NA	NA	NA	NA	NA
NA	RANGAP1	NA	NA	NA	NA	NA	NA	NA	NA	NA	NA	NA	NA	NA
NA	RANGRF	NA	NA	NA	NA	NA	NA	NA	NA	NA	NA	NA	NA	NA
NA	RAPGEF4	NA	NA	NA	NA	NA	NA	NA	NA	NA	NA	NA	NA	NA
NA	RAVER1	NA	NA	NA	NA	NA	NA	NA	NA	NA	NA	NA	NA	NA
NA	RBBP4	NA	NA	NA	NA	NA	NA	NA	NA	NA	NA	NA	NA	NA
NA	RBBP5	NA	NA	NA	NA	NA	NA	NA	NA	NA	NA	NA	NA	NA
NA	RBBP6	NA	NA	NA	NA	NA	NA	NA	NA	NA	NA	NA	NA	NA
NA	RBBP7	NA	NA	NA	NA	NA	NA	NA	NA	NA	NA	NA	NA	NA
NA	RBBP8	NA	NA	NA	NA	NA	NA	NA	NA	NA	NA	NA	NA	NA
NA	RBL1	NA	NA	NA	NA	NA	NA	NA	NA	NA	NA	NA	NA	NA
NA	RBM10	NA	NA	NA	NA	NA	NA	NA	NA	NA	NA	NA	NA	NA
NA	RBM12B	NA	NA	NA	NA	NA	NA	NA	NA	NA	NA	NA	NA	NA
NA	RBM14	NA	NA	NA	NA	NA	NA	NA	NA	NA	NA	NA	NA	NA
NA	RBM15	NA	NA	NA	NA	NA	NA	NA	NA	NA	NA	NA	NA	NA
NA	RBM15B	NA	NA	NA	NA	NA	NA	NA	NA	NA	NA	NA	NA	NA
NA	RBM19	NA	NA	NA	NA	NA	NA	NA	NA	NA	NA	NA	NA	NA
NA	RBM22	NA	NA	NA	NA	NA	NA	NA	NA	NA	NA	NA	NA	NA
NA	RBM23	NA	NA	NA	NA	NA	NA	NA	NA	NA	NA	NA	NA	NA
NA	RBM26	NA	NA	NA	NA	NA	NA	NA	NA	NA	NA	NA	NA	NA
NA	RBM27	NA	NA	NA	NA	NA	NA	NA	NA	NA	NA	NA	NA	NA
NA	RBM28	NA	NA	NA	NA	NA	NA	NA	NA	NA	NA	NA	NA	NA
NA	RBM33	NA	NA	NA	NA	NA	NA	NA	NA	NA	NA	NA	NA	NA
NA	RBM38	NA	NA	NA	NA	NA	NA	NA	NA	NA	NA	NA	NA	NA
NA	RBM39	NA	NA	NA	NA	NA	NA	NA	NA	NA	NA	NA	NA	NA
NA	RBM43	NA	NA	NA	NA	NA	NA	NA	NA	NA	NA	NA	NA	NA
NA	RBMS3	NA	NA	NA	NA	NA	NA	NA	NA	NA	NA	NA	NA	NA
NA	RBPMS2	NA	NA	NA	NA	NA	NA	NA	NA	NA	NA	NA	NA	NA
NA	RCC2	NA	NA	NA	NA	NA	NA	NA	NA	NA	NA	NA	NA	NA
NA	RCCD1	NA	NA	NA	NA	NA	NA	NA	NA	NA	NA	NA	NA	NA
NA	RCL1	NA	NA	NA	NA	NA	NA	NA	NA	NA	NA	NA	NA	NA
NA	RCOR2	NA	NA	NA	NA	NA	NA	NA	NA	NA	NA	NA	NA	NA
NA	RECQL4	NA	NA	NA	NA	NA	NA	NA	NA	NA	NA	NA	NA	NA
NA	REEP4	NA	NA	NA	NA	NA	NA	NA	NA	NA	NA	NA	NA	NA
NA	REL	NA	NA	NA	NA	NA	NA	NA	NA	NA	NA	NA	NA	NA
NA	RELN	NA	NA	NA	NA	NA	NA	NA	NA	NA	NA	NA	NA	NA
NA	REPIN1	NA	NA	NA	NA	NA	NA	NA	NA	NA	NA	NA	NA	NA
NA	REXO1	NA	NA	NA	NA	NA	NA	NA	NA	NA	NA	NA	NA	NA
NA	RFC1	NA	NA	NA	NA	NA	NA	NA	NA	NA	NA	NA	NA	NA
NA	RFC2	NA	NA	NA	NA	NA	NA	NA	NA	NA	NA	NA	NA	NA
NA	RFC3	NA	NA	NA	NA	NA	NA	NA	NA	NA	NA	NA	NA	NA
NA	RFC4	NA	NA	NA	NA	NA	NA	NA	NA	NA	NA	NA	NA	NA
NA	RFC5	NA	NA	NA	NA	NA	NA	NA	NA	NA	NA	NA	NA	NA
NA	RFT1	NA	NA	NA	NA	NA	NA	NA	NA	NA	NA	NA	NA	NA
NA	RFWD3	NA	NA	NA	NA	NA	NA	NA	NA	NA	NA	NA	NA	NA
NA	RFX3	NA	NA	NA	NA	NA	NA	NA	NA	NA	NA	NA	NA	NA
NA	RFXAP	NA	NA	NA	NA	NA	NA	NA	NA	NA	NA	NA	NA	NA
NA	RGS12	NA	NA	NA	NA	NA	NA	NA	NA	NA	NA	NA	NA	NA
NA	RGS17	NA	NA	NA	NA	NA	NA	NA	NA	NA	NA	NA	NA	NA
NA	RGS20	NA	NA	NA	NA	NA	NA	NA	NA	NA	NA	NA	NA	NA
NA	RHOBTB2	NA	NA	NA	NA	NA	NA	NA	NA	NA	NA	NA	NA	NA
NA	RIBC2	NA	NA	NA	NA	NA	NA	NA	NA	NA	NA	NA	NA	NA
NA	RIF1	NA	NA	NA	NA	NA	NA	NA	NA	NA	NA	NA	NA	NA
NA	RIN1	NA	NA	NA	NA	NA	NA	NA	NA	NA	NA	NA	NA	NA
NA	RIOK1	NA	NA	NA	NA	NA	NA	NA	NA	NA	NA	NA	NA	NA
NA	RMI1	NA	NA	NA	NA	NA	NA	NA	NA	NA	NA	NA	NA	NA
NA	RMND5B	NA	NA	NA	NA	NA	NA	NA	NA	NA	NA	NA	NA	NA
NA	RNASEH2A	NA	NA	NA	NA	NA	NA	NA	NA	NA	NA	NA	NA	NA
NA	RNASEH2B	NA	NA	NA	NA	NA	NA	NA	NA	NA	NA	NA	NA	NA
NA	RNF114	NA	NA	NA	NA	NA	NA	NA	NA	NA	NA	NA	NA	NA
NA	RNF138	NA	NA	NA	NA	NA	NA	NA	NA	NA	NA	NA	NA	NA
NA	RNF168	NA	NA	NA	NA	NA	NA	NA	NA	NA	NA	NA	NA	NA
NA	RNF2	NA	NA	NA	NA	NA	NA	NA	NA	NA	NA	NA	NA	NA
NA	RNF214	NA	NA	NA	NA	NA	NA	NA	NA	NA	NA	NA	NA	NA
NA	RNF219	NA	NA	NA	NA	NA	NA	NA	NA	NA	NA	NA	NA	NA
NA	RNF220	NA	NA	NA	NA	NA	NA	NA	NA	NA	NA	NA	NA	NA
NA	RNF26	NA	NA	NA	NA	NA	NA	NA	NA	NA	NA	NA	NA	NA
NA	RNF34	NA	NA	NA	NA	NA	NA	NA	NA	NA	NA	NA	NA	NA
NA	RNF40	NA	NA	NA	NA	NA	NA	NA	NA	NA	NA	NA	NA	NA
NA	RNFT2	NA	NA	NA	NA	NA	NA	NA	NA	NA	NA	NA	NA	NA
NA	RNGTT	NA	NA	NA	NA	NA	NA	NA	NA	NA	NA	NA	NA	NA
NA	ROR2	NA	NA	NA	NA	NA	NA	NA	NA	NA	NA	NA	NA	NA
NA	RPA2	NA	NA	NA	NA	NA	NA	NA	NA	NA	NA	NA	NA	NA
NA	RPA3	NA	NA	NA	NA	NA	NA	NA	NA	NA	NA	NA	NA	NA
NA	RPAP1	NA	NA	NA	NA	NA	NA	NA	NA	NA	NA	NA	NA	NA
NA	RPAP3	NA	NA	NA	NA	NA	NA	NA	NA	NA	NA	NA	NA	NA
NA	RPF2	NA	NA	NA	NA	NA	NA	NA	NA	NA	NA	NA	NA	NA
NA	RPIA	NA	NA	NA	NA	NA	NA	NA	NA	NA	NA	NA	NA	NA
NA	RPL10A	NA	NA	NA	NA	NA	NA	NA	NA	NA	NA	NA	NA	NA
NA	RPL13	NA	NA	NA	NA	NA	NA	NA	NA	NA	NA	NA	NA	NA
NA	RPL22L1	NA	NA	NA	NA	NA	NA	NA	NA	NA	NA	NA	NA	NA
NA	RPL26L1	NA	NA	NA	NA	NA	NA	NA	NA	NA	NA	NA	NA	NA
NA	RPL27A	NA	NA	NA	NA	NA	NA	NA	NA	NA	NA	NA	NA	NA
NA	RPL39L	NA	NA	NA	NA	NA	NA	NA	NA	NA	NA	NA	NA	NA
NA	RPL7L1	NA	NA	NA	NA	NA	NA	NA	NA	NA	NA	NA	NA	NA
NA	RPP14	NA	NA	NA	NA	NA	NA	NA	NA	NA	NA	NA	NA	NA
NA	RPP25	NA	NA	NA	NA	NA	NA	NA	NA	NA	NA	NA	NA	NA
NA	RPP30	NA	NA	NA	NA	NA	NA	NA	NA	NA	NA	NA	NA	NA
NA	RPS15	NA	NA	NA	NA	NA	NA	NA	NA	NA	NA	NA	NA	NA
NA	RPS25	NA	NA	NA	NA	NA	NA	NA	NA	NA	NA	NA	NA	NA
NA	RPS3A	NA	NA	NA	NA	NA	NA	NA	NA	NA	NA	NA	NA	NA
NA	RPS4X	NA	NA	NA	NA	NA	NA	NA	NA	NA	NA	NA	NA	NA
NA	RPS6KA1	NA	NA	NA	NA	NA	NA	NA	NA	NA	NA	NA	NA	NA
NA	RPS6KA5	NA	NA	NA	NA	NA	NA	NA	NA	NA	NA	NA	NA	NA
NA	RPS7	NA	NA	NA	NA	NA	NA	NA	NA	NA	NA	NA	NA	NA
NA	RPS9	NA	NA	NA	NA	NA	NA	NA	NA	NA	NA	NA	NA	NA
NA	RPTOR	NA	NA	NA	NA	NA	NA	NA	NA	NA	NA	NA	NA	NA
NA	RPUSD4	NA	NA	NA	NA	NA	NA	NA	NA	NA	NA	NA	NA	NA
NA	RRM1	NA	NA	NA	NA	NA	NA	NA	NA	NA	NA	NA	NA	NA
NA	RRM2	NA	NA	NA	NA	NA	NA	NA	NA	NA	NA	NA	NA	NA
NA	RRP1	NA	NA	NA	NA	NA	NA	NA	NA	NA	NA	NA	NA	NA
NA	RRP15	NA	NA	NA	NA	NA	NA	NA	NA	NA	NA	NA	NA	NA
NA	RRP1B	NA	NA	NA	NA	NA	NA	NA	NA	NA	NA	NA	NA	NA
NA	RRP36	NA	NA	NA	NA	NA	NA	NA	NA	NA	NA	NA	NA	NA
NA	RRP7A	NA	NA	NA	NA	NA	NA	NA	NA	NA	NA	NA	NA	NA
NA	RRP8	NA	NA	NA	NA	NA	NA	NA	NA	NA	NA	NA	NA	NA
NA	RRP9	NA	NA	NA	NA	NA	NA	NA	NA	NA	NA	NA	NA	NA
NA	RSBN1L	NA	NA	NA	NA	NA	NA	NA	NA	NA	NA	NA	NA	NA
NA	RSL1D1	NA	NA	NA	NA	NA	NA	NA	NA	NA	NA	NA	NA	NA
NA	RSL24D1	NA	NA	NA	NA	NA	NA	NA	NA	NA	NA	NA	NA	NA
NA	RSRC1	NA	NA	NA	NA	NA	NA	NA	NA	NA	NA	NA	NA	NA
NA	RSRC2	NA	NA	NA	NA	NA	NA	NA	NA	NA	NA	NA	NA	NA
NA	RTF1	NA	NA	NA	NA	NA	NA	NA	NA	NA	NA	NA	NA	NA
NA	RTKN2	NA	NA	NA	NA	NA	NA	NA	NA	NA	NA	NA	NA	NA
NA	RTN4IP1	NA	NA	NA	NA	NA	NA	NA	NA	NA	NA	NA	NA	NA
NA	RTTN	NA	NA	NA	NA	NA	NA	NA	NA	NA	NA	NA	NA	NA
NA	RUNX1T1	NA	NA	NA	NA	NA	NA	NA	NA	NA	NA	NA	NA	NA
NA	RUNX2	NA	NA	NA	NA	NA	NA	NA	NA	NA	NA	NA	NA	NA
NA	RUVBL1	NA	NA	NA	NA	NA	NA	NA	NA	NA	NA	NA	NA	NA
NA	RUVBL2	NA	NA	NA	NA	NA	NA	NA	NA	NA	NA	NA	NA	NA
NA	RXRA	NA	NA	NA	NA	NA	NA	NA	NA	NA	NA	NA	NA	NA
NA	S100A3	NA	NA	NA	NA	NA	NA	NA	NA	NA	NA	NA	NA	NA
NA	SAAL1	NA	NA	NA	NA	NA	NA	NA	NA	NA	NA	NA	NA	NA
NA	SACS	NA	NA	NA	NA	NA	NA	NA	NA	NA	NA	NA	NA	NA
NA	SAE1	NA	NA	NA	NA	NA	NA	NA	NA	NA	NA	NA	NA	NA
NA	SAFB	NA	NA	NA	NA	NA	NA	NA	NA	NA	NA	NA	NA	NA
NA	SALL2	NA	NA	NA	NA	NA	NA	NA	NA	NA	NA	NA	NA	NA
NA	SAMHD1	NA	NA	NA	NA	NA	NA	NA	NA	NA	NA	NA	NA	NA
NA	SAP130	NA	NA	NA	NA	NA	NA	NA	NA	NA	NA	NA	NA	NA
NA	SARS2	NA	NA	NA	NA	NA	NA	NA	NA	NA	NA	NA	NA	NA
NA	SART1	NA	NA	NA	NA	NA	NA	NA	NA	NA	NA	NA	NA	NA
NA	SART3	NA	NA	NA	NA	NA	NA	NA	NA	NA	NA	NA	NA	NA
NA	SASS6	NA	NA	NA	NA	NA	NA	NA	NA	NA	NA	NA	NA	NA
NA	SBF2	NA	NA	NA	NA	NA	NA	NA	NA	NA	NA	NA	NA	NA
NA	SCAI	NA	NA	NA	NA	NA	NA	NA	NA	NA	NA	NA	NA	NA
NA	SCARA3	NA	NA	NA	NA	NA	NA	NA	NA	NA	NA	NA	NA	NA
NA	SCARNA10	NA	NA	NA	NA	NA	NA	NA	NA	NA	NA	NA	NA	NA
NA	SCARNA9L	NA	NA	NA	NA	NA	NA	NA	NA	NA	NA	NA	NA	NA
NA	SCD	NA	NA	NA	NA	NA	NA	NA	NA	NA	NA	NA	NA	NA
NA	SCLT1	NA	NA	NA	NA	NA	NA	NA	NA	NA	NA	NA	NA	NA
NA	SCMH1	NA	NA	NA	NA	NA	NA	NA	NA	NA	NA	NA	NA	NA
NA	SCML1	NA	NA	NA	NA	NA	NA	NA	NA	NA	NA	NA	NA	NA
NA	SCML2	NA	NA	NA	NA	NA	NA	NA	NA	NA	NA	NA	NA	NA
NA	SDC1	NA	NA	NA	NA	NA	NA	NA	NA	NA	NA	NA	NA	NA
NA	SECISBP2	NA	NA	NA	NA	NA	NA	NA	NA	NA	NA	NA	NA	NA
NA	SEH1L	NA	NA	NA	NA	NA	NA	NA	NA	NA	NA	NA	NA	NA
NA	SELENBP1	NA	NA	NA	NA	NA	NA	NA	NA	NA	NA	NA	NA	NA
NA	SEMA3A	NA	NA	NA	NA	NA	NA	NA	NA	NA	NA	NA	NA	NA
NA	SEMA3D	NA	NA	NA	NA	NA	NA	NA	NA	NA	NA	NA	NA	NA
NA	SEMA4C	NA	NA	NA	NA	NA	NA	NA	NA	NA	NA	NA	NA	NA
NA	SEMA4D	NA	NA	NA	NA	NA	NA	NA	NA	NA	NA	NA	NA	NA
NA	SENP1	NA	NA	NA	NA	NA	NA	NA	NA	NA	NA	NA	NA	NA
NA	SENP7	NA	NA	NA	NA	NA	NA	NA	NA	NA	NA	NA	NA	NA
NA	SEPHS1	NA	NA	NA	NA	NA	NA	NA	NA	NA	NA	NA	NA	NA
NA	SEPSECS	NA	NA	NA	NA	NA	NA	NA	NA	NA	NA	NA	NA	NA
NA	SERP2	NA	NA	NA	NA	NA	NA	NA	NA	NA	NA	NA	NA	NA
NA	SESTD1	NA	NA	NA	NA	NA	NA	NA	NA	NA	NA	NA	NA	NA
NA	SET	NA	NA	NA	NA	NA	NA	NA	NA	NA	NA	NA	NA	NA
NA	SETD1A	NA	NA	NA	NA	NA	NA	NA	NA	NA	NA	NA	NA	NA
NA	SETD1B	NA	NA	NA	NA	NA	NA	NA	NA	NA	NA	NA	NA	NA
NA	SETD2	NA	NA	NA	NA	NA	NA	NA	NA	NA	NA	NA	NA	NA
NA	SETDB1	NA	NA	NA	NA	NA	NA	NA	NA	NA	NA	NA	NA	NA
NA	SETDB2	NA	NA	NA	NA	NA	NA	NA	NA	NA	NA	NA	NA	NA
NA	SETMAR	NA	NA	NA	NA	NA	NA	NA	NA	NA	NA	NA	NA	NA
NA	SF1	NA	NA	NA	NA	NA	NA	NA	NA	NA	NA	NA	NA	NA
NA	SF3A1	NA	NA	NA	NA	NA	NA	NA	NA	NA	NA	NA	NA	NA
NA	SF3A2	NA	NA	NA	NA	NA	NA	NA	NA	NA	NA	NA	NA	NA
NA	SF3A3	NA	NA	NA	NA	NA	NA	NA	NA	NA	NA	NA	NA	NA
NA	SF3B2	NA	NA	NA	NA	NA	NA	NA	NA	NA	NA	NA	NA	NA
NA	SF3B3	NA	NA	NA	NA	NA	NA	NA	NA	NA	NA	NA	NA	NA
NA	SF3B4	NA	NA	NA	NA	NA	NA	NA	NA	NA	NA	NA	NA	NA
NA	SFMBT1	NA	NA	NA	NA	NA	NA	NA	NA	NA	NA	NA	NA	NA
NA	SFMBT2	NA	NA	NA	NA	NA	NA	NA	NA	NA	NA	NA	NA	NA
NA	SFPQ	NA	NA	NA	NA	NA	NA	NA	NA	NA	NA	NA	NA	NA
NA	SFSWAP	NA	NA	NA	NA	NA	NA	NA	NA	NA	NA	NA	NA	NA
NA	SFXN2	NA	NA	NA	NA	NA	NA	NA	NA	NA	NA	NA	NA	NA
NA	SFXN4	NA	NA	NA	NA	NA	NA	NA	NA	NA	NA	NA	NA	NA
NA	SFXN5	NA	NA	NA	NA	NA	NA	NA	NA	NA	NA	NA	NA	NA
NA	SGK494	NA	NA	NA	NA	NA	NA	NA	NA	NA	NA	NA	NA	NA
NA	SHCBP1	NA	NA	NA	NA	NA	NA	NA	NA	NA	NA	NA	NA	NA
NA	SHMT1	NA	NA	NA	NA	NA	NA	NA	NA	NA	NA	NA	NA	NA
NA	SHMT2	NA	NA	NA	NA	NA	NA	NA	NA	NA	NA	NA	NA	NA
NA	SHPRH	NA	NA	NA	NA	NA	NA	NA	NA	NA	NA	NA	NA	NA
NA	SHQ1	NA	NA	NA	NA	NA	NA	NA	NA	NA	NA	NA	NA	NA
NA	SIK2	NA	NA	NA	NA	NA	NA	NA	NA	NA	NA	NA	NA	NA
NA	SIN3A	NA	NA	NA	NA	NA	NA	NA	NA	NA	NA	NA	NA	NA
NA	SIPA1L2	NA	NA	NA	NA	NA	NA	NA	NA	NA	NA	NA	NA	NA
NA	SIRT1	NA	NA	NA	NA	NA	NA	NA	NA	NA	NA	NA	NA	NA
NA	SIVA1	NA	NA	NA	NA	NA	NA	NA	NA	NA	NA	NA	NA	NA
NA	SKA1	NA	NA	NA	NA	NA	NA	NA	NA	NA	NA	NA	NA	NA
NA	SKA2	NA	NA	NA	NA	NA	NA	NA	NA	NA	NA	NA	NA	NA
NA	SKA3	NA	NA	NA	NA	NA	NA	NA	NA	NA	NA	NA	NA	NA
NA	SKP2	NA	NA	NA	NA	NA	NA	NA	NA	NA	NA	NA	NA	NA
NA	SLBP	NA	NA	NA	NA	NA	NA	NA	NA	NA	NA	NA	NA	NA
NA	SLC12A7	NA	NA	NA	NA	NA	NA	NA	NA	NA	NA	NA	NA	NA
NA	SLC16A7	NA	NA	NA	NA	NA	NA	NA	NA	NA	NA	NA	NA	NA
NA	SLC17A9	NA	NA	NA	NA	NA	NA	NA	NA	NA	NA	NA	NA	NA
NA	SLC19A1	NA	NA	NA	NA	NA	NA	NA	NA	NA	NA	NA	NA	NA
NA	SLC25A10	NA	NA	NA	NA	NA	NA	NA	NA	NA	NA	NA	NA	NA
NA	SLC25A13	NA	NA	NA	NA	NA	NA	NA	NA	NA	NA	NA	NA	NA
NA	SLC25A15	NA	NA	NA	NA	NA	NA	NA	NA	NA	NA	NA	NA	NA
NA	SLC25A17	NA	NA	NA	NA	NA	NA	NA	NA	NA	NA	NA	NA	NA
NA	SLC25A19	NA	NA	NA	NA	NA	NA	NA	NA	NA	NA	NA	NA	NA
NA	SLC25A33	NA	NA	NA	NA	NA	NA	NA	NA	NA	NA	NA	NA	NA
NA	SLC25A35	NA	NA	NA	NA	NA	NA	NA	NA	NA	NA	NA	NA	NA
NA	SLC25A40	NA	NA	NA	NA	NA	NA	NA	NA	NA	NA	NA	NA	NA
NA	SLC25A5	NA	NA	NA	NA	NA	NA	NA	NA	NA	NA	NA	NA	NA
NA	SLC29A1	NA	NA	NA	NA	NA	NA	NA	NA	NA	NA	NA	NA	NA
NA	SLC2A4RG	NA	NA	NA	NA	NA	NA	NA	NA	NA	NA	NA	NA	NA
NA	SLC35D1	NA	NA	NA	NA	NA	NA	NA	NA	NA	NA	NA	NA	NA
NA	SLC36A4	NA	NA	NA	NA	NA	NA	NA	NA	NA	NA	NA	NA	NA
NA	SLC37A4	NA	NA	NA	NA	NA	NA	NA	NA	NA	NA	NA	NA	NA
NA	SLC38A4	NA	NA	NA	NA	NA	NA	NA	NA	NA	NA	NA	NA	NA
NA	SLC44A1	NA	NA	NA	NA	NA	NA	NA	NA	NA	NA	NA	NA	NA
NA	SLC4A7	NA	NA	NA	NA	NA	NA	NA	NA	NA	NA	NA	NA	NA
NA	SLC4A8	NA	NA	NA	NA	NA	NA	NA	NA	NA	NA	NA	NA	NA
NA	SLC5A6	NA	NA	NA	NA	NA	NA	NA	NA	NA	NA	NA	NA	NA
NA	SLC7A1	NA	NA	NA	NA	NA	NA	NA	NA	NA	NA	NA	NA	NA
NA	SLC7A11	NA	NA	NA	NA	NA	NA	NA	NA	NA	NA	NA	NA	NA
NA	SLC7A14	NA	NA	NA	NA	NA	NA	NA	NA	NA	NA	NA	NA	NA
NA	SLC7A2	NA	NA	NA	NA	NA	NA	NA	NA	NA	NA	NA	NA	NA
NA	SLC7A6OS	NA	NA	NA	NA	NA	NA	NA	NA	NA	NA	NA	NA	NA
NA	SLC9A9	NA	NA	NA	NA	NA	NA	NA	NA	NA	NA	NA	NA	NA
NA	SLCO3A1	NA	NA	NA	NA	NA	NA	NA	NA	NA	NA	NA	NA	NA
NA	SLFN11	NA	NA	NA	NA	NA	NA	NA	NA	NA	NA	NA	NA	NA
NA	SLFN12L	NA	NA	NA	NA	NA	NA	NA	NA	NA	NA	NA	NA	NA
NA	SLFN13	NA	NA	NA	NA	NA	NA	NA	NA	NA	NA	NA	NA	NA
NA	SLIT2	NA	NA	NA	NA	NA	NA	NA	NA	NA	NA	NA	NA	NA
NA	SLX4	NA	NA	NA	NA	NA	NA	NA	NA	NA	NA	NA	NA	NA
NA	SMAD1	NA	NA	NA	NA	NA	NA	NA	NA	NA	NA	NA	NA	NA
NA	SMAD4	NA	NA	NA	NA	NA	NA	NA	NA	NA	NA	NA	NA	NA
NA	SMAD6	NA	NA	NA	NA	NA	NA	NA	NA	NA	NA	NA	NA	NA
NA	SMAD9	NA	NA	NA	NA	NA	NA	NA	NA	NA	NA	NA	NA	NA
NA	SMAP2	NA	NA	NA	NA	NA	NA	NA	NA	NA	NA	NA	NA	NA
NA	SMARCA2	NA	NA	NA	NA	NA	NA	NA	NA	NA	NA	NA	NA	NA
NA	SMARCA4	NA	NA	NA	NA	NA	NA	NA	NA	NA	NA	NA	NA	NA
NA	SMARCA5	NA	NA	NA	NA	NA	NA	NA	NA	NA	NA	NA	NA	NA
NA	SMARCAD1	NA	NA	NA	NA	NA	NA	NA	NA	NA	NA	NA	NA	NA
NA	SMARCB1	NA	NA	NA	NA	NA	NA	NA	NA	NA	NA	NA	NA	NA
NA	SMARCC1	NA	NA	NA	NA	NA	NA	NA	NA	NA	NA	NA	NA	NA
NA	SMARCC2	NA	NA	NA	NA	NA	NA	NA	NA	NA	NA	NA	NA	NA
NA	SMARCD1	NA	NA	NA	NA	NA	NA	NA	NA	NA	NA	NA	NA	NA
NA	SMARCE1	NA	NA	NA	NA	NA	NA	NA	NA	NA	NA	NA	NA	NA
NA	SMC1A	NA	NA	NA	NA	NA	NA	NA	NA	NA	NA	NA	NA	NA
NA	SMC2	NA	NA	NA	NA	NA	NA	NA	NA	NA	NA	NA	NA	NA
NA	SMC3	NA	NA	NA	NA	NA	NA	NA	NA	NA	NA	NA	NA	NA
NA	SMC4	NA	NA	NA	NA	NA	NA	NA	NA	NA	NA	NA	NA	NA
NA	SMCHD1	NA	NA	NA	NA	NA	NA	NA	NA	NA	NA	NA	NA	NA
NA	SMNDC1	NA	NA	NA	NA	NA	NA	NA	NA	NA	NA	NA	NA	NA
NA	SMO	NA	NA	NA	NA	NA	NA	NA	NA	NA	NA	NA	NA	NA
NA	SMPD2	NA	NA	NA	NA	NA	NA	NA	NA	NA	NA	NA	NA	NA
NA	SMPD4	NA	NA	NA	NA	NA	NA	NA	NA	NA	NA	NA	NA	NA
NA	SMS	NA	NA	NA	NA	NA	NA	NA	NA	NA	NA	NA	NA	NA
NA	SMU1	NA	NA	NA	NA	NA	NA	NA	NA	NA	NA	NA	NA	NA
NA	SMYD4	NA	NA	NA	NA	NA	NA	NA	NA	NA	NA	NA	NA	NA
NA	SMYD5	NA	NA	NA	NA	NA	NA	NA	NA	NA	NA	NA	NA	NA
NA	SNAI1	NA	NA	NA	NA	NA	NA	NA	NA	NA	NA	NA	NA	NA
NA	SNCAIP	NA	NA	NA	NA	NA	NA	NA	NA	NA	NA	NA	NA	NA
NA	SNORA16B	NA	NA	NA	NA	NA	NA	NA	NA	NA	NA	NA	NA	NA
NA	SNORA58	NA	NA	NA	NA	NA	NA	NA	NA	NA	NA	NA	NA	NA
NA	SNORA71C	NA	NA	NA	NA	NA	NA	NA	NA	NA	NA	NA	NA	NA
NA	SNORA74A	NA	NA	NA	NA	NA	NA	NA	NA	NA	NA	NA	NA	NA
NA	SNORD15A	NA	NA	NA	NA	NA	NA	NA	NA	NA	NA	NA	NA	NA
NA	SNRNP200	NA	NA	NA	NA	NA	NA	NA	NA	NA	NA	NA	NA	NA
NA	SNRNP40	NA	NA	NA	NA	NA	NA	NA	NA	NA	NA	NA	NA	NA
NA	SNRNP48	NA	NA	NA	NA	NA	NA	NA	NA	NA	NA	NA	NA	NA
NA	SNRPA	NA	NA	NA	NA	NA	NA	NA	NA	NA	NA	NA	NA	NA
NA	SNRPB2	NA	NA	NA	NA	NA	NA	NA	NA	NA	NA	NA	NA	NA
NA	SNRPC	NA	NA	NA	NA	NA	NA	NA	NA	NA	NA	NA	NA	NA
NA	SNRPD1	NA	NA	NA	NA	NA	NA	NA	NA	NA	NA	NA	NA	NA
NA	SNRPD3	NA	NA	NA	NA	NA	NA	NA	NA	NA	NA	NA	NA	NA
NA	SNRPE	NA	NA	NA	NA	NA	NA	NA	NA	NA	NA	NA	NA	NA
NA	SNRPF	NA	NA	NA	NA	NA	NA	NA	NA	NA	NA	NA	NA	NA
NA	SNRPG	NA	NA	NA	NA	NA	NA	NA	NA	NA	NA	NA	NA	NA
NA	SNW1	NA	NA	NA	NA	NA	NA	NA	NA	NA	NA	NA	NA	NA
NA	SNX5	NA	NA	NA	NA	NA	NA	NA	NA	NA	NA	NA	NA	NA
NA	SOCS1	NA	NA	NA	NA	NA	NA	NA	NA	NA	NA	NA	NA	NA
NA	SOCS2	NA	NA	NA	NA	NA	NA	NA	NA	NA	NA	NA	NA	NA
NA	SOCS3	NA	NA	NA	NA	NA	NA	NA	NA	NA	NA	NA	NA	NA
NA	SOCS6	NA	NA	NA	NA	NA	NA	NA	NA	NA	NA	NA	NA	NA
NA	SORD	NA	NA	NA	NA	NA	NA	NA	NA	NA	NA	NA	NA	NA
NA	SORL1	NA	NA	NA	NA	NA	NA	NA	NA	NA	NA	NA	NA	NA
NA	SOX11	NA	NA	NA	NA	NA	NA	NA	NA	NA	NA	NA	NA	NA
NA	SP1	NA	NA	NA	NA	NA	NA	NA	NA	NA	NA	NA	NA	NA
NA	SP2	NA	NA	NA	NA	NA	NA	NA	NA	NA	NA	NA	NA	NA
[truncated: 522 more rows]

## Sheet: GSE59861_3h_GSE55118
X1_sets_GSE55118_middle_vs_young	X1_sets_GSE55118_old_vs_young	X1_sets_GSE59861_3h_2Gy	X1_sets_GSE59861_3h_5cGy	X2_sets_GSE55118_middle_vs_young_GSE55118_old_vs_young	X2_sets_GSE55118_middle_vs_young_GSE59861_3h_2Gy	X2_sets_GSE55118_middle_vs_young_GSE59861_3h_5cGy	X2_sets_GSE55118_old_vs_young_GSE59861_3h_2Gy	X2_sets_GSE55118_old_vs_young_GSE59861_3h_5cGy	X2_sets_GSE59861_3h_2Gy_GSE59861_3h_5cGy	X3_sets_GSE55118_middle_vs_young_GSE55118_old_vs_young_GSE59861_3h_2Gy	X3_sets_GSE55118_middle_vs_young_GSE55118_old_vs_young_GSE59861_3h_5cGy	X3_sets_GSE55118_middle_vs_young_GSE59861_3h_2Gy_GSE59861_3h_5cGy	X3_sets_GSE55118_old_vs_young_GSE59861_3h_2Gy_GSE59861_3h_5cGy	X4_sets_GSE55118_middle_vs_young_GSE55118_old_vs_young_GSE59861_3h_2Gy_GSE59861_3h_5cGy
AACS	ABL2	ABCC4	ACE	AGER	JAG1	CCDC22	NA	MCF2L	GIT2	NA	ZNF711	NA	NA	NA
ABCD1	ACD	ABCE1	ATPAF2	ARHGAP6	PDE5A	ZNF711	NA	ZNF711	HSDL1	NA	NA	NA	NA	NA
ABHD4	ADAMTS1	ABI1	BBS12	BANP	NA	NA	NA	NA	SBNO1	NA	NA	NA	NA	NA
ABLIM1	AGER	ABI3BP	BRCC3	BCKDHA	NA	NA	NA	NA	NA	NA	NA	NA	NA	NA
ACACA	AMOTL1	ACAD9	C15ORF32	C11ORF86	NA	NA	NA	NA	NA	NA	NA	NA	NA	NA
ACAD10	ANKLE2	ACSL1	C5ORF34	C7ORF61	NA	NA	NA	NA	NA	NA	NA	NA	NA	NA
ACBD4	ANKRD46	ACTB	CCDC22	CDHR5	NA	NA	NA	NA	NA	NA	NA	NA	NA	NA
ACSF3	APLP1	ACTR2	CEP152	CYP2E1	NA	NA	NA	NA	NA	NA	NA	NA	NA	NA
ADAM19	ARHGAP23	ACTR3	DIRAS2	EFHC2	NA	NA	NA	NA	NA	NA	NA	NA	NA	NA
ADAMTS5	ARHGAP6	ACVR1	DOCK9	FOXP3	NA	NA	NA	NA	NA	NA	NA	NA	NA	NA
ADAR	B9D1	ADAM10	ERGIC1	GRIPAP1	NA	NA	NA	NA	NA	NA	NA	NA	NA	NA
ADD1	BANP	ADAM9	GIT2	GUCA1B	NA	NA	NA	NA	NA	NA	NA	NA	NA	NA
ADHFE1	BCKDHA	ADSS	HIST1H2BD	INPP4B	NA	NA	NA	NA	NA	NA	NA	NA	NA	NA
AEBP1	C11ORF86	AGPAT5	HSD3B7	KCTD13	NA	NA	NA	NA	NA	NA	NA	NA	NA	NA
AGA	C22ORF24	AGTR1	HSDL1	LDB2	NA	NA	NA	NA	NA	NA	NA	NA	NA	NA
AGER	C2CD4C	AK3	IL1RL2	LYPD4	NA	NA	NA	NA	NA	NA	NA	NA	NA	NA
AHNAK2	C2ORF70	ALCAM	KIF21B	MAMSTR	NA	NA	NA	NA	NA	NA	NA	NA	NA	NA
AKAP12	C4BPB	ANKRD13C	LPAR4	MPPED1	NA	NA	NA	NA	NA	NA	NA	NA	NA	NA
ALG1L	C7ORF61	AP3M1	MCF2L	MUC7	NA	NA	NA	NA	NA	NA	NA	NA	NA	NA
ALOX5AP	CABP4	AP4B1	NF1	NPLOC4	NA	NA	NA	NA	NA	NA	NA	NA	NA	NA
AMPD2	CALCA	APBB2	NLRP3	NR2E3	NA	NA	NA	NA	NA	NA	NA	NA	NA	NA
ANAPC13	CCDC27	APP	NMUR1	OR4K14	NA	NA	NA	NA	NA	NA	NA	NA	NA	NA
ANKRD13B	CDA	ARFGAP3	OR5P3	OR56A1	NA	NA	NA	NA	NA	NA	NA	NA	NA	NA
AP2A2	CDHR5	ARHGAP18	PADI2	OR5L1	NA	NA	NA	NA	NA	NA	NA	NA	NA	NA
AP4M1	CENPO	ARHGEF12	PLEKHM2	OR6Q1	NA	NA	NA	NA	NA	NA	NA	NA	NA	NA
APLNR	CHGB	ARL6IP1	PLIN1	PDGFB	NA	NA	NA	NA	NA	NA	NA	NA	NA	NA
APOBEC3C	COX15	ARL8B	POLR2C	POLR2F	NA	NA	NA	NA	NA	NA	NA	NA	NA	NA
APOBEC3F	CPLX2	ASCC1	PPY	PRKAR1B	NA	NA	NA	NA	NA	NA	NA	NA	NA	NA
AQP3	CSNK1G2	ASPH	PROS1	SLFNL1	NA	NA	NA	NA	NA	NA	NA	NA	NA	NA
ARAP1	CYP2E1	ATF1	RINL	TBC1D10C	NA	NA	NA	NA	NA	NA	NA	NA	NA	NA
ARHGAP1	DET1	ATF2	RNPC3	TEX13A	NA	NA	NA	NA	NA	NA	NA	NA	NA	NA
ARHGAP28	DHDH	ATF6	SBNO1	TMC6	NA	NA	NA	NA	NA	NA	NA	NA	NA	NA
ARHGAP6	DOT1L	ATP6V1A	SETD7	TP53INP2	NA	NA	NA	NA	NA	NA	NA	NA	NA	NA
ARHGEF4	DRD5	ATP6V1B2	SPATA8	TRPM6	NA	NA	NA	NA	NA	NA	NA	NA	NA	NA
ARMCX2	EFHC2	ATRX	THOC2	TRPM8	NA	NA	NA	NA	NA	NA	NA	NA	NA	NA
ARRB1	EFNA5	B3GNT2	TSSK6	VASH2	NA	NA	NA	NA	NA	NA	NA	NA	NA	NA
ARSE	EPB42	B4GALT4	ZDBF2	VSX1	NA	NA	NA	NA	NA	NA	NA	NA	NA	NA
ASTN2	FARP1	BCL10	ZNF711	ZBTB48	NA	NA	NA	NA	NA	NA	NA	NA	NA	NA
ATG2A	FAT4	BCLAF1	ZNF782	ZFAT	NA	NA	NA	NA	NA	NA	NA	NA	NA	NA
ATP6AP1L	FGA	BZW2	NA	ZMAT4	NA	NA	NA	NA	NA	NA	NA	NA	NA	NA
BAIAP2	FGF6	C1ORF174	NA	ZNF711	NA	NA	NA	NA	NA	NA	NA	NA	NA	NA
BANP	FGFR1	C1ORF43	NA	ZNFX1	NA	NA	NA	NA	NA	NA	NA	NA	NA	NA
BBS4	FLCN	C5ORF15	NA	NA	NA	NA	NA	NA	NA	NA	NA	NA	NA	NA
BBS5	FLG	CAB39	NA	NA	NA	NA	NA	NA	NA	NA	NA	NA	NA	NA
BBS9	FLNA	CALCOCO2	NA	NA	NA	NA	NA	NA	NA	NA	NA	NA	NA	NA
BCAS3	FOXP3	CALD1	NA	NA	NA	NA	NA	NA	NA	NA	NA	NA	NA	NA
BCKDHA	FUT3	CALU	NA	NA	NA	NA	NA	NA	NA	NA	NA	NA	NA	NA
BCO2	FXYD3	CANX	NA	NA	NA	NA	NA	NA	NA	NA	NA	NA	NA	NA
BNC2	GABRA5	CAP2	NA	NA	NA	NA	NA	NA	NA	NA	NA	NA	NA	NA
BPNT1	GABRQ	CAPN2	NA	NA	NA	NA	NA	NA	NA	NA	NA	NA	NA	NA
BRF2	GH1	CAPZA1	NA	NA	NA	NA	NA	NA	NA	NA	NA	NA	NA	NA
BSX	GMPPA	CAPZA2	NA	NA	NA	NA	NA	NA	NA	NA	NA	NA	NA	NA
BTBD2	GRIP2	CASP7	NA	NA	NA	NA	NA	NA	NA	NA	NA	NA	NA	NA
C11ORF86	GRIPAP1	CAT	NA	NA	NA	NA	NA	NA	NA	NA	NA	NA	NA	NA
C1QTNF6	GUCA1B	CCDC117	NA	NA	NA	NA	NA	NA	NA	NA	NA	NA	NA	NA
C7ORF61	IL2RG	CCNG2	NA	NA	NA	NA	NA	NA	NA	NA	NA	NA	NA	NA
C8ORF31	INO80E	CCT2	NA	NA	NA	NA	NA	NA	NA	NA	NA	NA	NA	NA
CANT1	INPP4B	CD164	NA	NA	NA	NA	NA	NA	NA	NA	NA	NA	NA	NA
CC2D1A	INSC	CD46	NA	NA	NA	NA	NA	NA	NA	NA	NA	NA	NA	NA
CC2D2A	ITGA3	CDC14B	NA	NA	NA	NA	NA	NA	NA	NA	NA	NA	NA	NA
CCDC22	ITGA5	CDC16	NA	NA	NA	NA	NA	NA	NA	NA	NA	NA	NA	NA
CCDC65	IYD	CDC27	NA	NA	NA	NA	NA	NA	NA	NA	NA	NA	NA	NA
CCDC8	KCNJ9	CDC5L	NA	NA	NA	NA	NA	NA	NA	NA	NA	NA	NA	NA
CD276	KCTD13	CDC73	NA	NA	NA	NA	NA	NA	NA	NA	NA	NA	NA	NA
CD52	KLHDC10	CDH11	NA	NA	NA	NA	NA	NA	NA	NA	NA	NA	NA	NA
CDH18	LDB2	CDKL3	NA	NA	NA	NA	NA	NA	NA	NA	NA	NA	NA	NA
CDHR5	LIPH	CDKN1B	NA	NA	NA	NA	NA	NA	NA	NA	NA	NA	NA	NA
CDKN2B	LMF1	CHSY1	NA	NA	NA	NA	NA	NA	NA	NA	NA	NA	NA	NA
CEMP1	LMOD2	CKAP2	NA	NA	NA	NA	NA	NA	NA	NA	NA	NA	NA	NA
CHD3	LYPD4	CKAP5	NA	NA	NA	NA	NA	NA	NA	NA	NA	NA	NA	NA
CLCN2	MAMSTR	CLASP2	NA	NA	NA	NA	NA	NA	NA	NA	NA	NA	NA	NA
CLSTN3	MAP2	CLPX	NA	NA	NA	NA	NA	NA	NA	NA	NA	NA	NA	NA
CMA1	MASP1	CLTC	NA	NA	NA	NA	NA	NA	NA	NA	NA	NA	NA	NA
COG4	MCF2L	CNBP	NA	NA	NA	NA	NA	NA	NA	NA	NA	NA	NA	NA
CREB3L3	MIER2	CNOT6	NA	NA	NA	NA	NA	NA	NA	NA	NA	NA	NA	NA
CSAD	MMP19	CNOT8	NA	NA	NA	NA	NA	NA	NA	NA	NA	NA	NA	NA
CUL7	MPPED1	COG5	NA	NA	NA	NA	NA	NA	NA	NA	NA	NA	NA	NA
CYB5D2	MRAP2	COQ10B	NA	NA	NA	NA	NA	NA	NA	NA	NA	NA	NA	NA
CYB5R3	MUC7	CORIN	NA	NA	NA	NA	NA	NA	NA	NA	NA	NA	NA	NA
CYHR1	NACAD	CPOX	NA	NA	NA	NA	NA	NA	NA	NA	NA	NA	NA	NA
CYP2E1	NADK	CRK	NA	NA	NA	NA	NA	NA	NA	NA	NA	NA	NA	NA
DCLK1	NCR2	CTNNB1	NA	NA	NA	NA	NA	NA	NA	NA	NA	NA	NA	NA
DDX24	NEFH	CYB5B	NA	NA	NA	NA	NA	NA	NA	NA	NA	NA	NA	NA
DISP1	NEK4	CYBRD1	NA	NA	NA	NA	NA	NA	NA	NA	NA	NA	NA	NA
DMAP1	NPLOC4	DCK	NA	NA	NA	NA	NA	NA	NA	NA	NA	NA	NA	NA
DNAJC4	NR2E3	DCTN4	NA	NA	NA	NA	NA	NA	NA	NA	NA	NA	NA	NA
DNASE1	OGFOD1	DCUN1D1	NA	NA	NA	NA	NA	NA	NA	NA	NA	NA	NA	NA
EEF2	OR4K14	DCUN1D4	NA	NA	NA	NA	NA	NA	NA	NA	NA	NA	NA	NA
EFCAB7	OR51S1	DDX3X	NA	NA	NA	NA	NA	NA	NA	NA	NA	NA	NA	NA
EFHC2	OR56A1	DEK	NA	NA	NA	NA	NA	NA	NA	NA	NA	NA	NA	NA
EHMT2	OR5L1	DHX40	NA	NA	NA	NA	NA	NA	NA	NA	NA	NA	NA	NA
EIF3F	OR6Q1	DKK3	NA	NA	NA	NA	NA	NA	NA	NA	NA	NA	NA	NA
EPB41L2	OXTR	DLG1	NA	NA	NA	NA	NA	NA	NA	NA	NA	NA	NA	NA
EPHB3	PANK4	DNAJB6	NA	NA	NA	NA	NA	NA	NA	NA	NA	NA	NA	NA
EPSTI1	PDGFB	DNM1L	NA	NA	NA	NA	NA	NA	NA	NA	NA	NA	NA	NA
EXOC3	PEX26	DOCK11	NA	NA	NA	NA	NA	NA	NA	NA	NA	NA	NA	NA
FAM198B	PGLYRP1	DPP4	NA	NA	NA	NA	NA	NA	NA	NA	NA	NA	NA	NA
FAM3A	PLAT	DROSHA	NA	NA	NA	NA	NA	NA	NA	NA	NA	NA	NA	NA
FAM71B	PLCXD1	DSP	NA	NA	NA	NA	NA	NA	NA	NA	NA	NA	NA	NA
FBXO15	PLK1	DST	NA	NA	NA	NA	NA	NA	NA	NA	NA	NA	NA	NA
FBXO6	PLXNA3	DYNC1LI2	NA	NA	NA	NA	NA	NA	NA	NA	NA	NA	NA	NA
FBXW9	POLR2F	EEF1A1	NA	NA	NA	NA	NA	NA	NA	NA	NA	NA	NA	NA
FCGR2B	PRKAR1B	EIF2AK1	NA	NA	NA	NA	NA	NA	NA	NA	NA	NA	NA	NA
FES	PRMT5	EIF2AK3	NA	NA	NA	NA	NA	NA	NA	NA	NA	NA	NA	NA
FGF16	PRSS3	EIF2S1	NA	NA	NA	NA	NA	NA	NA	NA	NA	NA	NA	NA
FGGY	RALGAPB	EIF4B	NA	NA	NA	NA	NA	NA	NA	NA	NA	NA	NA	NA
FLT3LG	RFX1	EIF4G2	NA	NA	NA	NA	NA	NA	NA	NA	NA	NA	NA	NA
FNDC5	SCN5A	ELOVL5	NA	NA	NA	NA	NA	NA	NA	NA	NA	NA	NA	NA
FOXK2	SEMA7A	EPS8	NA	NA	NA	NA	NA	NA	NA	NA	NA	NA	NA	NA
FOXP3	SF3B3	ETAA1	NA	NA	NA	NA	NA	NA	NA	NA	NA	NA	NA	NA
G6PD	SH2D7	EXT2	NA	NA	NA	NA	NA	NA	NA	NA	NA	NA	NA	NA
GAL3ST4	SLC13A4	EXTL2	NA	NA	NA	NA	NA	NA	NA	NA	NA	NA	NA	NA
GALM	SLFNL1	FAF2	NA	NA	NA	NA	NA	NA	NA	NA	NA	NA	NA	NA
GALP	SMPD1	FAM172A	NA	NA	NA	NA	NA	NA	NA	NA	NA	NA	NA	NA
GLG1	SMTN	FAM98A	NA	NA	NA	NA	NA	NA	NA	NA	NA	NA	NA	NA
GPR108	SP6	FBXO11	NA	NA	NA	NA	NA	NA	NA	NA	NA	NA	NA	NA
GPR137	SPEF1	FHL1	NA	NA	NA	NA	NA	NA	NA	NA	NA	NA	NA	NA
GRAMD1A	SPTAN1	FKBP9	NA	NA	NA	NA	NA	NA	NA	NA	NA	NA	NA	NA
GRIPAP1	STX1B	FNDC3B	NA	NA	NA	NA	NA	NA	NA	NA	NA	NA	NA	NA
GSTA4	SUPT6H	FRMD6	NA	NA	NA	NA	NA	NA	NA	NA	NA	NA	NA	NA
GTF2H5	TAF6	G3BP1	NA	NA	NA	NA	NA	NA	NA	NA	NA	NA	NA	NA
GTPBP8	TBC1D10C	G3BP2	NA	NA	NA	NA	NA	NA	NA	NA	NA	NA	NA	NA
GUCA1B	TEX13A	GART	NA	NA	NA	NA	NA	NA	NA	NA	NA	NA	NA	NA
HAAO	TMC6	GIN1	NA	NA	NA	NA	NA	NA	NA	NA	NA	NA	NA	NA
HDAC10	TNFRSF10D	GIT2	NA	NA	NA	NA	NA	NA	NA	NA	NA	NA	NA	NA
HDAC11	TP53INP2	GLCCI1	NA	NA	NA	NA	NA	NA	NA	NA	NA	NA	NA	NA
HDLBP	TPD52L2	GLO1	NA	NA	NA	NA	NA	NA	NA	NA	NA	NA	NA	NA
HES1	TRIM46	GLOD4	NA	NA	NA	NA	NA	NA	NA	NA	NA	NA	NA	NA
HFE	TRPM6	GLS	NA	NA	NA	NA	NA	NA	NA	NA	NA	NA	NA	NA
HGF	TRPM8	GNAI1	NA	NA	NA	NA	NA	NA	NA	NA	NA	NA	NA	NA
HHLA3	USH1C	GNAQ	NA	NA	NA	NA	NA	NA	NA	NA	NA	NA	NA	NA
HOXD9	VASH2	GNG12	NA	NA	NA	NA	NA	NA	NA	NA	NA	NA	NA	NA
HPD	VSX1	GNL3	NA	NA	NA	NA	NA	NA	NA	NA	NA	NA	NA	NA
HPS1	WARS2	GOLIM4	NA	NA	NA	NA	NA	NA	NA	NA	NA	NA	NA	NA
HR	WFDC5	GOLPH3	NA	NA	NA	NA	NA	NA	NA	NA	NA	NA	NA	NA
HS1BP3	WNT2B	GSPT2	NA	NA	NA	NA	NA	NA	NA	NA	NA	NA	NA	NA
HSPA1L	ZBTB48	GYG1	NA	NA	NA	NA	NA	NA	NA	NA	NA	NA	NA	NA
HSPB1	ZC3H11A	HDAC1	NA	NA	NA	NA	NA	NA	NA	NA	NA	NA	NA	NA
HTRA3	ZFAT	HDAC8	NA	NA	NA	NA	NA	NA	NA	NA	NA	NA	NA	NA
ID2	ZMAT4	HIBADH	NA	NA	NA	NA	NA	NA	NA	NA	NA	NA	NA	NA
IFI35	ZNF133	HIF1A	NA	NA	NA	NA	NA	NA	NA	NA	NA	NA	NA	NA
IFT122	ZNF285	HNRNPA1	NA	NA	NA	NA	NA	NA	NA	NA	NA	NA	NA	NA
IFT46	ZNF385D	HSDL1	NA	NA	NA	NA	NA	NA	NA	NA	NA	NA	NA	NA
IGDCC4	ZNF575	HSPA5	NA	NA	NA	NA	NA	NA	NA	NA	NA	NA	NA	NA
IGFBP6	ZNF711	HSPA8	NA	NA	NA	NA	NA	NA	NA	NA	NA	NA	NA	NA
IGSF6	ZNFX1	HSPA9	NA	NA	NA	NA	NA	NA	NA	NA	NA	NA	NA	NA
IL2RB	NA	HSPD1	NA	NA	NA	NA	NA	NA	NA	NA	NA	NA	NA	NA
INPP4B	NA	HSPH1	NA	NA	NA	NA	NA	NA	NA	NA	NA	NA	NA	NA
IPP	NA	IFI16	NA	NA	NA	NA	NA	NA	NA	NA	NA	NA	NA	NA
ISLR	NA	IFNGR1	NA	NA	NA	NA	NA	NA	NA	NA	NA	NA	NA	NA
ITGA11	NA	IFT52	NA	NA	NA	NA	NA	NA	NA	NA	NA	NA	NA	NA
JAG1	NA	IGFBP3	NA	NA	NA	NA	NA	NA	NA	NA	NA	NA	NA	NA
KCND1	NA	IKBIP	NA	NA	NA	NA	NA	NA	NA	NA	NA	NA	NA	NA
KCTD13	NA	INTS6	NA	NA	NA	NA	NA	NA	NA	NA	NA	NA	NA	NA
KDM5B	NA	IQGAP1	NA	NA	NA	NA	NA	NA	NA	NA	NA	NA	NA	NA
KLHL22	NA	ITGAV	NA	NA	NA	NA	NA	NA	NA	NA	NA	NA	NA	NA
KSR1	NA	ITGB1	NA	NA	NA	NA	NA	NA	NA	NA	NA	NA	NA	NA
LDB1	NA	JAG1	NA	NA	NA	NA	NA	NA	NA	NA	NA	NA	NA	NA
LDB2	NA	JAK1	NA	NA	NA	NA	NA	NA	NA	NA	NA	NA	NA	NA
LEPROTL1	NA	KCTD18	NA	NA	NA	NA	NA	NA	NA	NA	NA	NA	NA	NA
LILRB4	NA	KIF2A	NA	NA	NA	NA	NA	NA	NA	NA	NA	NA	NA	NA
LRRC17	NA	KLF6	NA	NA	NA	NA	NA	NA	NA	NA	NA	NA	NA	NA
LRRC47	NA	KLHL5	NA	NA	NA	NA	NA	NA	NA	NA	NA	NA	NA	NA
LRSAM1	NA	KRIT1	NA	NA	NA	NA	NA	NA	NA	NA	NA	NA	NA	NA
LTBP4	NA	LACTB	NA	NA	NA	NA	NA	NA	NA	NA	NA	NA	NA	NA
LYPD4	NA	LAMP2	NA	NA	NA	NA	NA	NA	NA	NA	NA	NA	NA	NA
MAMSTR	NA	LARS	NA	NA	NA	NA	NA	NA	NA	NA	NA	NA	NA	NA
MAN1B1	NA	LGMN	NA	NA	NA	NA	NA	NA	NA	NA	NA	NA	NA	NA
MAN1C1	NA	LMAN1	NA	NA	NA	NA	NA	NA	NA	NA	NA	NA	NA	NA
MAP1LC3C	NA	LRP12	NA	NA	NA	NA	NA	NA	NA	NA	NA	NA	NA	NA
MAP2K5	NA	LTV1	NA	NA	NA	NA	NA	NA	NA	NA	NA	NA	NA	NA
MAP4	NA	LYN	NA	NA	NA	NA	NA	NA	NA	NA	NA	NA	NA	NA
MAPK11	NA	MAP1LC3B	NA	NA	NA	NA	NA	NA	NA	NA	NA	NA	NA	NA
MAPK3	NA	MAP3K2	NA	NA	NA	NA	NA	NA	NA	NA	NA	NA	NA	NA
MAPK8IP1	NA	MAP3K7	NA	NA	NA	NA	NA	NA	NA	NA	NA	NA	NA	NA
MARK4	NA	MAP4K3	NA	NA	NA	NA	NA	NA	NA	NA	NA	NA	NA	NA
MAST3	NA	MAPK6	NA	NA	NA	NA	NA	NA	NA	NA	NA	NA	NA	NA
MAST4	NA	MAPKAP1	NA	NA	NA	NA	NA	NA	NA	NA	NA	NA	NA	NA
MBNL2	NA	MAT2B	NA	NA	NA	NA	NA	NA	NA	NA	NA	NA	NA	NA
MBP	NA	MAX	NA	NA	NA	NA	NA	NA	NA	NA	NA	NA	NA	NA
MCC	NA	MBOAT2	NA	NA	NA	NA	NA	NA	NA	NA	NA	NA	NA	NA
MEGF8	NA	METAP1	NA	NA	NA	NA	NA	NA	NA	NA	NA	NA	NA	NA
MEN1	NA	MFSD1	NA	NA	NA	NA	NA	NA	NA	NA	NA	NA	NA	NA
MIB2	NA	MIS12	NA	NA	NA	NA	NA	NA	NA	NA	NA	NA	NA	NA
MLST8	NA	MKRN1	NA	NA	NA	NA	NA	NA	NA	NA	NA	NA	NA	NA
MPPED1	NA	MME	NA	NA	NA	NA	NA	NA	NA	NA	NA	NA	NA	NA
MPPED2	NA	MOSPD1	NA	NA	NA	NA	NA	NA	NA	NA	NA	NA	NA	NA
MR1	NA	MRPS27	NA	NA	NA	NA	NA	NA	NA	NA	NA	NA	NA	NA
MTHFR	NA	MRS2	NA	NA	NA	NA	NA	NA	NA	NA	NA	NA	NA	NA
MTMR1	NA	MSH6	NA	NA	NA	NA	NA	NA	NA	NA	NA	NA	NA	NA
MTR	NA	MSRB3	NA	NA	NA	NA	NA	NA	NA	NA	NA	NA	NA	NA
MUC7	NA	NAP1L1	NA	NA	NA	NA	NA	NA	NA	NA	NA	NA	NA	NA
MYCBP2	NA	NAP1L4	NA	NA	NA	NA	NA	NA	NA	NA	NA	NA	NA	NA
MYOCD	NA	NARS	NA	NA	NA	NA	NA	NA	NA	NA	NA	NA	NA	NA
MYOZ3	NA	NCBP2	NA	NA	NA	NA	NA	NA	NA	NA	NA	NA	NA	NA
NBAS	NA	NCKAP1	NA	NA	NA	NA	NA	NA	NA	NA	NA	NA	NA	NA
NFE2	NA	NCOA3	NA	NA	NA	NA	NA	NA	NA	NA	NA	NA	NA	NA
NISCH	NA	NCOA4	NA	NA	NA	NA	NA	NA	NA	NA	NA	NA	NA	NA
NLE1	NA	NECAP1	NA	NA	NA	NA	NA	NA	NA	NA	NA	NA	NA	NA
NLGN4Y	NA	NNT	NA	NA	NA	NA	NA	NA	NA	NA	NA	NA	NA	NA
NOTCH2	NA	NPTN	NA	NA	NA	NA	NA	NA	NA	NA	NA	NA	NA	NA
NPLOC4	NA	NR2C1	NA	NA	NA	NA	NA	NA	NA	NA	NA	NA	NA	NA
NR2E3	NA	NRCAM	NA	NA	NA	NA	NA	NA	NA	NA	NA	NA	NA	NA
NSMCE1	NA	NSF	NA	NA	NA	NA	NA	NA	NA	NA	NA	NA	NA	NA
NTNG1	NA	NSUN2	NA	NA	NA	NA	NA	NA	NA	NA	NA	NA	NA	NA
NUDT13	NA	NTN4	NA	NA	NA	NA	NA	NA	NA	NA	NA	NA	NA	NA
OAF	NA	NUB1	NA	NA	NA	NA	NA	NA	NA	NA	NA	NA	NA	NA
ODF3L1	NA	NUCKS1	NA	NA	NA	NA	NA	NA	NA	NA	NA	NA	NA	NA
OGFOD2	NA	NUP153	NA	NA	NA	NA	NA	NA	NA	NA	NA	NA	NA	NA
OR10A3	NA	NUPL2	NA	NA	NA	NA	NA	NA	NA	NA	NA	NA	NA	NA
OR4K14	NA	OGT	NA	NA	NA	NA	NA	NA	NA	NA	NA	NA	NA	NA
OR56A1	NA	OLA1	NA	NA	NA	NA	NA	NA	NA	NA	NA	NA	NA	NA
OR5L1	NA	OXR1	NA	NA	NA	NA	NA	NA	NA	NA	NA	NA	NA	NA
OR6Q1	NA	PAPOLA	NA	NA	NA	NA	NA	NA	NA	NA	NA	NA	NA	NA
PANK3	NA	PAPSS1	NA	NA	NA	NA	NA	NA	NA	NA	NA	NA	NA	NA
PARP10	NA	PARN	NA	NA	NA	NA	NA	NA	NA	NA	NA	NA	NA	NA
PARP16	NA	PDCD1LG2	NA	NA	NA	NA	NA	NA	NA	NA	NA	NA	NA	NA
PATZ1	NA	PDE5A	NA	NA	NA	NA	NA	NA	NA	NA	NA	NA	NA	NA
PCSK5	NA	PDIA6	NA	NA	NA	NA	NA	NA	NA	NA	NA	NA	NA	NA
PDE5A	NA	PFN2	NA	NA	NA	NA	NA	NA	NA	NA	NA	NA	NA	NA
PDGFB	NA	PGRMC1	NA	NA	NA	NA	NA	NA	NA	NA	NA	NA	NA	NA
PDK2	NA	PHLDB2	NA	NA	NA	NA	NA	NA	NA	NA	NA	NA	NA	NA
PEF1	NA	PHTF2	NA	NA	NA	NA	NA	NA	NA	NA	NA	NA	NA	NA
PIP5KL1	NA	PICALM	NA	NA	NA	NA	NA	NA	NA	NA	NA	NA	NA	NA
PLA2G6	NA	PITPNB	NA	NA	NA	NA	NA	NA	NA	NA	NA	NA	NA	NA
PLEKHF1	NA	PKD2	NA	NA	NA	NA	NA	NA	NA	NA	NA	NA	NA	NA
PLEKHG4	NA	PLOD2	NA	NA	NA	NA	NA	NA	NA	NA	NA	NA	NA	NA
POLR2F	NA	PLRG1	NA	NA	NA	NA	NA	NA	NA	NA	NA	NA	NA	NA
POLRMT	NA	PLS3	NA	NA	NA	NA	NA	NA	NA	NA	NA	NA	NA	NA
PPM1M	NA	PNN	NA	NA	NA	NA	NA	NA	NA	NA	NA	NA	NA	NA
PRDM16	NA	POLE3	NA	NA	NA	NA	NA	NA	NA	NA	NA	NA	NA	NA
PRDX2	NA	PPM1B	NA	NA	NA	NA	NA	NA	NA	NA	NA	NA	NA	NA
PRICKLE2	NA	PPP1CB	NA	NA	NA	NA	NA	NA	NA	NA	NA	NA	NA	NA
PRKAG1	NA	PPP1R12A	NA	NA	NA	NA	NA	NA	NA	NA	NA	NA	NA	NA
PRKAR1B	NA	PPP3R1	NA	NA	NA	NA	NA	NA	NA	NA	NA	NA	NA	NA
PRMT7	NA	PPP4R1	NA	NA	NA	NA	NA	NA	NA	NA	NA	NA	NA	NA
PRSS54	NA	PPP6R3	NA	NA	NA	NA	NA	NA	NA	NA	NA	NA	NA	NA
PTCD3	NA	PPT1	NA	NA	NA	NA	NA	NA	NA	NA	NA	NA	NA	NA
PTCH1	NA	PRKDC	NA	NA	NA	NA	NA	NA	NA	NA	NA	NA	NA	NA
PTP4A3	NA	PRMT2	NA	NA	NA	NA	NA	NA	NA	NA	NA	NA	NA	NA
PYCR2	NA	PRMT3	NA	NA	NA	NA	NA	NA	NA	NA	NA	NA	NA	NA
RAI1	NA	PRNP	NA	NA	NA	NA	NA	NA	NA	NA	NA	NA	NA	NA
RBCK1	NA	PRPF4B	NA	NA	NA	NA	NA	NA	NA	NA	NA	NA	NA	NA
RECQL5	NA	PRPS2	NA	NA	NA	NA	NA	NA	NA	NA	NA	NA	NA	NA
RGL2	NA	PSEN1	NA	NA	NA	NA	NA	NA	NA	NA	NA	NA	NA	NA
RNASEL	NA	PTGES3	NA	NA	NA	NA	NA	NA	NA	NA	NA	NA	NA	NA
RNF123	NA	PTPRK	NA	NA	NA	NA	NA	NA	NA	NA	NA	NA	NA	NA
RNF125	NA	QKI	NA	NA	NA	NA	NA	NA	NA	NA	NA	NA	NA	NA
RNF40	NA	RAB5A	NA	NA	NA	NA	NA	NA	NA	NA	NA	NA	NA	NA
RPL22L1	NA	RAB6A	NA	NA	NA	NA	NA	NA	NA	NA	NA	NA	NA	NA
RRBP1	NA	RAD23B	NA	NA	NA	NA	NA	NA	NA	NA	NA	NA	NA	NA
S100A14	NA	RAP1B	NA	NA	NA	NA	NA	NA	NA	NA	NA	NA	NA	NA
SAT1	NA	RAP1GDS1	NA	NA	NA	NA	NA	NA	NA	NA	NA	NA	NA	NA
SCARA3	NA	RB1CC1	NA	NA	NA	NA	NA	NA	NA	NA	NA	NA	NA	NA
SCNN1A	NA	RBM25	NA	NA	NA	NA	NA	NA	NA	NA	NA	NA	NA	NA
SCNN1D	NA	RCAN1	NA	NA	NA	NA	NA	NA	NA	NA	NA	NA	NA	NA
SDK1	NA	RCN1	NA	NA	NA	NA	NA	NA	NA	NA	NA	NA	NA	NA
SELENBP1	NA	RDX	NA	NA	NA	NA	NA	NA	NA	NA	NA	NA	NA	NA
SEMA3B	NA	REEP5	NA	NA	NA	NA	NA	NA	NA	NA	NA	NA	NA	NA
SEMA3G	NA	RFC1	NA	NA	NA	NA	NA	NA	NA	NA	NA	NA	NA	NA
SEMA4B	NA	RHEB	NA	NA	NA	NA	NA	NA	NA	NA	NA	NA	NA	NA
SH3BP5	NA	RHOA	NA	NA	NA	NA	NA	NA	NA	NA	NA	NA	NA	NA
SIAE	NA	RIOK3	NA	NA	NA	NA	NA	NA	NA	NA	NA	NA	NA	NA
SIRT2	NA	RNF11	NA	NA	NA	NA	NA	NA	NA	NA	NA	NA	NA	NA
SIRT3	NA	RNF145	NA	NA	NA	NA	NA	NA	NA	NA	NA	NA	NA	NA
SIRT5	NA	RNFT1	NA	NA	NA	NA	NA	NA	NA	NA	NA	NA	NA	NA
SLC16A4	NA	ROBO1	NA	NA	NA	NA	NA	NA	NA	NA	NA	NA	NA	NA
SLC22A12	NA	RORA	NA	NA	NA	NA	NA	NA	NA	NA	NA	NA	NA	NA
SLC35E4	NA	RPE	NA	NA	NA	NA	NA	NA	NA	NA	NA	NA	NA	NA
SLC45A1	NA	RPL15	NA	NA	NA	NA	NA	NA	NA	NA	NA	NA	NA	NA
SLFNL1	NA	RPS6KB1	NA	NA	NA	NA	NA	NA	NA	NA	NA	NA	NA	NA
SMARCD3	NA	RRM1	NA	NA	NA	NA	NA	NA	NA	NA	NA	NA	NA	NA
SMG6	NA	RTN3	NA	NA	NA	NA	NA	NA	NA	NA	NA	NA	NA	NA
SNTG1	NA	SBNO1	NA	NA	NA	NA	NA	NA	NA	NA	NA	NA	NA	NA
SNUPN	NA	SCLT1	NA	NA	NA	NA	NA	NA	NA	NA	NA	NA	NA	NA
SNX21	NA	SCOC	NA	NA	NA	NA	NA	NA	NA	NA	NA	NA	NA	NA
SPATA4	NA	SDCBP	NA	NA	NA	NA	NA	NA	NA	NA	NA	NA	NA	NA
SPG7	NA	SEC23A	NA	NA	NA	NA	NA	NA	NA	NA	NA	NA	NA	NA
SPNS1	NA	SECISBP2	NA	NA	NA	NA	NA	NA	NA	NA	NA	NA	NA	NA
TAF1	NA	SENP2	NA	NA	NA	NA	NA	NA	NA	NA	NA	NA	NA	NA
TBC1D10C	NA	SERPINB7	NA	NA	NA	NA	NA	NA	NA	NA	NA	NA	NA	NA
TBC1D17	NA	SETD2	NA	NA	NA	NA	NA	NA	NA	NA	NA	NA	NA	NA
TBCD	NA	SETD3	NA	NA	NA	NA	NA	NA	NA	NA	NA	NA	NA	NA
TCF25	NA	SETD6	NA	NA	NA	NA	NA	NA	NA	NA	NA	NA	NA	NA
TEX13A	NA	SGPP1	NA	NA	NA	NA	NA	NA	NA	NA	NA	NA	NA	NA
THAP11	NA	SH3KBP1	NA	NA	NA	NA	NA	NA	NA	NA	NA	NA	NA	NA
THAP8	NA	SIN3A	NA	NA	NA	NA	NA	NA	NA	NA	NA	NA	NA	NA
THRA	NA	SLC16A1	NA	NA	NA	NA	NA	NA	NA	NA	NA	NA	NA	NA
TLE3	NA	SLC25A14	NA	NA	NA	NA	NA	NA	NA	NA	NA	NA	NA	NA
TLR3	NA	SLC25A32	NA	NA	NA	NA	NA	NA	NA	NA	NA	NA	NA	NA
TMC6	NA	SLC30A7	NA	NA	NA	NA	NA	NA	NA	NA	NA	NA	NA	NA
TMEM115	NA	SLC39A6	NA	NA	NA	NA	NA	NA	NA	NA	NA	NA	NA	NA
TMEM45A	NA	SLFN5	NA	NA	NA	NA	NA	NA	NA	NA	NA	NA	NA	NA
TP53I3	NA	SMAD4	NA	NA	NA	NA	NA	NA	NA	NA	NA	NA	NA	NA
TP53INP2	NA	SMARCA2	NA	NA	NA	NA	NA	NA	NA	NA	NA	NA	NA	NA
TPRG1L	NA	SNAP23	NA	NA	NA	NA	NA	NA	NA	NA	NA	NA	NA	NA
TRIL	NA	SNIP1	NA	NA	NA	NA	NA	NA	NA	NA	NA	NA	NA	NA
TRIM4	NA	SPARC	NA	NA	NA	NA	NA	NA	NA	NA	NA	NA	NA	NA
TRPM6	NA	SPTBN1	NA	NA	NA	NA	NA	NA	NA	NA	NA	NA	NA	NA
TRPM8	NA	SPTLC1	NA	NA	NA	NA	NA	NA	NA	NA	NA	NA	NA	NA
TSC2	NA	SRSF1	NA	NA	NA	NA	NA	NA	NA	NA	NA	NA	NA	NA
UBA7	NA	SRSF5	NA	NA	NA	NA	NA	NA	NA	NA	NA	NA	NA	NA
UBE2L6	NA	SSR3	NA	NA	NA	NA	NA	NA	NA	NA	NA	NA	NA	NA
UBE3B	NA	STARD7	NA	NA	NA	NA	NA	NA	NA	NA	NA	NA	NA	NA
UCK1	NA	STAT1	NA	NA	NA	NA	NA	NA	NA	NA	NA	NA	NA	NA
UNC45A	NA	STAU1	NA	NA	NA	NA	NA	NA	NA	NA	NA	NA	NA	NA
USP20	NA	STIL	NA	NA	NA	NA	NA	NA	NA	NA	NA	NA	NA	NA
VAC14	NA	STIP1	NA	NA	NA	NA	NA	NA	NA	NA	NA	NA	NA	NA
VASH2	NA	STX12	NA	NA	NA	NA	NA	NA	NA	NA	NA	NA	NA	NA
VPS8	NA	STXBP5	NA	NA	NA	NA	NA	NA	NA	NA	NA	NA	NA	NA
VSX1	NA	SUCLG2	NA	NA	NA	NA	NA	NA	NA	NA	NA	NA	NA	NA
WASF2	NA	SVIL	NA	NA	NA	NA	NA	NA	NA	NA	NA	NA	NA	NA
WT1-AS	NA	TAB2	NA	NA	NA	NA	NA	NA	NA	NA	NA	NA	NA	NA
XAB2	NA	TAF13	NA	NA	NA	NA	NA	NA	NA	NA	NA	NA	NA	NA
YTHDF3	NA	TBCE	NA	NA	NA	NA	NA	NA	NA	NA	NA	NA	NA	NA
ZBTB48	NA	TCEA1	NA	NA	NA	NA	NA	NA	NA	NA	NA	NA	NA	NA
ZBTB7C	NA	TM9SF3	NA	NA	NA	NA	NA	NA	NA	NA	NA	NA	NA	NA
ZFAT	NA	TM9SF4	NA	NA	NA	NA	NA	NA	NA	NA	NA	NA	NA	NA
ZFHX2	NA	TMED2	NA	NA	NA	NA	NA	NA	NA	NA	NA	NA	NA	NA
ZFP30	NA	TMEM184C	NA	NA	NA	NA	NA	NA	NA	NA	NA	NA	NA	NA
ZFP64	NA	TMPO	NA	NA	NA	NA	NA	NA	NA	NA	NA	NA	NA	NA
ZMAT4	NA	TMX1	NA	NA	NA	NA	NA	NA	NA	NA	NA	NA	NA	NA
ZMYM3	NA	TNC	NA	NA	NA	NA	NA	NA	NA	NA	NA	NA	NA	NA
ZNF132	NA	TNFSF18	NA	NA	NA	NA	NA	NA	NA	NA	NA	NA	NA	NA
ZNF18	NA	TOMM20	NA	NA	NA	NA	NA	NA	NA	NA	NA	NA	NA	NA
ZNF337	NA	TOP2A	NA	NA	NA	NA	NA	NA	NA	NA	NA	NA	NA	NA
ZNF358	NA	TPM3	NA	NA	NA	NA	NA	NA	NA	NA	NA	NA	NA	NA
ZNF500	NA	TRA2A	NA	NA	NA	NA	NA	NA	NA	NA	NA	NA	NA	NA
ZNF589	NA	TRAPPC8	NA	NA	NA	NA	NA	NA	NA	NA	NA	NA	NA	NA
ZNF618	NA	TRIM37	NA	NA	NA	NA	NA	NA	NA	NA	NA	NA	NA	NA
ZNF711	NA	TRPS1	NA	NA	NA	NA	NA	NA	NA	NA	NA	NA	NA	NA
ZNF780B	NA	TTC19	NA	NA	NA	NA	NA	NA	NA	NA	NA	NA	NA	NA
ZNF81	NA	TTC3	NA	NA	NA	NA	NA	NA	NA	NA	NA	NA	NA	NA
ZNFX1	NA	TTC39B	NA	NA	NA	NA	NA	NA	NA	NA	NA	NA	NA	NA
ZP1	NA	TWF1	NA	NA	NA	NA	NA	NA	NA	NA	NA	NA	NA	NA
ZSWIM3	NA	TXNIP	NA	NA	NA	NA	NA	NA	NA	NA	NA	NA	NA	NA
NA	NA	TXNRD1	NA	NA	NA	NA	NA	NA	NA	NA	NA	NA	NA	NA
NA	NA	UACA	NA	NA	NA	NA	NA	NA	NA	NA	NA	NA	NA	NA
NA	NA	UBA2	NA	NA	NA	NA	NA	NA	NA	NA	NA	NA	NA	NA
NA	NA	UBAC2	NA	NA	NA	NA	NA	NA	NA	NA	NA	NA	NA	NA
NA	NA	UBAP1	NA	NA	NA	NA	NA	NA	NA	NA	NA	NA	NA	NA
NA	NA	UBE4A	NA	NA	NA	NA	NA	NA	NA	NA	NA	NA	NA	NA
NA	NA	UBXN2A	NA	NA	NA	NA	NA	NA	NA	NA	NA	NA	NA	NA
NA	NA	UGDH	NA	NA	NA	NA	NA	NA	NA	NA	NA	NA	NA	NA
NA	NA	USP10	NA	NA	NA	NA	NA	NA	NA	NA	NA	NA	NA	NA
NA	NA	USP34	NA	NA	NA	NA	NA	NA	NA	NA	NA	NA	NA	NA
NA	NA	USP7	NA	NA	NA	NA	NA	NA	NA	NA	NA	NA	NA	NA
NA	NA	USP8	NA	NA	NA	NA	NA	NA	NA	NA	NA	NA	NA	NA
NA	NA	UTP6	NA	NA	NA	NA	NA	NA	NA	NA	NA	NA	NA	NA
NA	NA	VAMP3	NA	NA	NA	NA	NA	NA	NA	NA	NA	NA	NA	NA
NA	NA	VCAN	NA	NA	NA	NA	NA	NA	NA	NA	NA	NA	NA	NA
NA	NA	VPS45	NA	NA	NA	NA	NA	NA	NA	NA	NA	NA	NA	NA
NA	NA	WAC	NA	NA	NA	NA	NA	NA	NA	NA	NA	NA	NA	NA
NA	NA	WDR11	NA	NA	NA	NA	NA	NA	NA	NA	NA	NA	NA	NA
NA	NA	WDR44	NA	NA	NA	NA	NA	NA	NA	NA	NA	NA	NA	NA
NA	NA	WIPF1	NA	NA	NA	NA	NA	NA	NA	NA	NA	NA	NA	NA
NA	NA	WNT5A	NA	NA	NA	NA	NA	NA	NA	NA	NA	NA	NA	NA
NA	NA	WSB1	NA	NA	NA	NA	NA	NA	NA	NA	NA	NA	NA	NA
NA	NA	WTAP	NA	NA	NA	NA	NA	NA	NA	NA	NA	NA	NA	NA
NA	NA	XPO1	NA	NA	NA	NA	NA	NA	NA	NA	NA	NA	NA	NA
NA	NA	XRN2	NA	NA	NA	NA	NA	NA	NA	NA	NA	NA	NA	NA
NA	NA	YME1L1	NA	NA	NA	NA	NA	NA	NA	NA	NA	NA	NA	NA
NA	NA	YWHAQ	NA	NA	NA	NA	NA	NA	NA	NA	NA	NA	NA	NA
NA	NA	YWHAZ	NA	NA	NA	NA	NA	NA	NA	NA	NA	NA	NA	NA
NA	NA	ZC3HAV1	NA	NA	NA	NA	NA	NA	NA	NA	NA	NA	NA	NA
NA	NA	ZFAND6	NA	NA	NA	NA	NA	NA	NA	NA	NA	NA	NA	NA
NA	NA	ZFR	NA	NA	NA	NA	NA	NA	NA	NA	NA	NA	NA	NA
NA	NA	ZMPSTE24	NA	NA	NA	NA	NA	NA	NA	NA	NA	NA	NA	NA
NA	NA	ZNF155	NA	NA	NA	NA	NA	NA	NA	NA	NA	NA	NA	NA
NA	NA	ZNF175	NA	NA	NA	NA	NA	NA	NA	NA	NA	NA	NA	NA
NA	NA	ZNF292	NA	NA	NA	NA	NA	NA	NA	NA	NA	NA	NA	NA
NA	NA	ZNF544	NA	NA	NA	NA	NA	NA	NA	NA	NA	NA	NA	NA
NA	NA	ZNF791	NA	NA	NA	NA	NA	NA	NA	NA	NA	NA	NA	NA
NA	NA	ZNHIT6	NA	NA	NA	NA	NA	NA	NA	NA	NA	NA	NA	NA

## Sheet: GSE59861_6h_EMTAB2086
X1_sets_EMTAB2086_70_vs_30	X1_sets_EMTAB2086_80_vs_30	X1_sets_GSE59861_6h_2Gy	X1_sets_GSE59861_6h_5cGy	X2_sets_EMTAB2086_70_vs_30_EMTAB2086_80_vs_30	X2_sets_EMTAB2086_70_vs_30_GSE59861_6h_2Gy	X2_sets_EMTAB2086_70_vs_30_GSE59861_6h_5cGy	X2_sets_EMTAB2086_80_vs_30_GSE59861_6h_2Gy	X2_sets_EMTAB2086_80_vs_30_GSE59861_6h_5cGy	X2_sets_GSE59861_6h_2Gy_GSE59861_6h_5cGy	X3_sets_EMTAB2086_70_vs_30_EMTAB2086_80_vs_30_GSE59861_6h_2Gy	X3_sets_EMTAB2086_70_vs_30_EMTAB2086_80_vs_30_GSE59861_6h_5cGy	X3_sets_EMTAB2086_70_vs_30_GSE59861_6h_2Gy_GSE59861_6h_5cGy	X3_sets_EMTAB2086_80_vs_30_GSE59861_6h_2Gy_GSE59861_6h_5cGy	X4_sets_EMTAB2086_70_vs_30_EMTAB2086_80_vs_30_GSE59861_6h_2Gy_GSE59861_6h_5cGy
AAAS	AAAS	ABCB4	ABCE1	AAAS	ARRB2	DNAJC9	ARRB2	C9ORF64	ACADSB	ARRB2	DNAJC9	SENP1	SENP1	SENP1
ACD	AADAT	ACADSB	ABI1	ACD	CDC25A	HSPD1	CDC25A	DEPDC1	BHLHE40	CDC25A	HSPD1	TCF7L2	TCF7L2	TCF7L2
ACTC1	AASDH	ARHGAP26	ACADSB	ACTC1	CDCA7	MRPS27	CDCA7	DNAJC9	CHST11	CDCA7	MRPS27	TXNRD1	TXNRD1	TXNRD1
ACTR5	AASDHPPT	ARHGAP29	ACER1	ACTR5	FANCE	SENP1	CDT1	EGR1	CTH	FANCE	SENP1	NA	NA	NA
ADAMTS3	AASS	ARRB2	ALDH1L1	ADAMTS3	FANCL	TCF7L2	DLG3	EPS8	DDX3X	FANCL	TCF7L2	NA	NA	NA
ADARB1	AATF	BCOR	ALPK3	ADARB1	GATA2	TXNRD1	ERCC3	FRYL	DLG1	GATA2	TXNRD1	NA	NA	NA
ADCY3	ABCB7	BHLHE40	ARNTL	ADCY3	MIS12	NA	FANCE	G3BP1	DUSP2	MIS12	NA	NA	NA	NA
ADPRH	ABCC9	CACNA2D3	BHLHE40	AGK	MSH6	NA	FANCL	HSPD1	NEDD9	MSH6	NA	NA	NA	NA
AGK	ABCF2	CDC25A	BIRC3	AGPAT5	MTMR4	NA	GATA2	MRPS27	RGS16	MTMR4	NA	NA	NA	NA
AGPAT5	ABCG2	CDCA7	BRCC3	AKAP1	RFWD3	NA	HMGB1	NR1D2	SENP1	RFWD3	NA	NA	NA	NA
AKAP1	ABHD10	CDH11	C15ORF32	AKR1E2	SENP1	NA	MIS12	RSRC2	SNAP23	SENP1	NA	NA	NA	NA
AKR1E2	ABHD2	CDK5R1	C9ORF64	ALDH1A3	SYBU	NA	MSH6	SCMH1	ST6GAL1	TCF7L2	NA	NA	NA	NA
ALDH1A3	ABHD3	CDT1	CAB39	ALMS1	TCF7L2	NA	MTMR4	SENP1	TCF7L2	TXNRD1	NA	NA	NA	NA
ALDH3A2	ABI2	CHRNA10	CCDC24	AMOT	TXNRD1	NA	NFIC	STIP1	TTC9	ZNF367	NA	NA	NA	NA
ALG9	ABI3	CHST11	CD7	ANGEL2	ZNF367	NA	NHSL1	TCF7L2	TXNRD1	NA	NA	NA	NA	NA
ALMS1	ABI3BP	COX15	CDC16	ANKRD28	NA	NA	PPM1B	THUMPD1	ZNF470	NA	NA	NA	NA	NA
AMOT	ABT1	CTH	CHST11	ANP32A	NA	NA	PTER	TXNRD1	NA	NA	NA	NA	NA	NA
ANGEL2	ACACA	DDX3X	CHSY1	ANP32B	NA	NA	RBM22	NA	NA	NA	NA	NA	NA	NA
ANKRD28	ACAD10	DLG1	CLASP2	AP1G2	NA	NA	RFWD3	NA	NA	NA	NA	NA	NA	NA
ANP32A	ACAD9	DLG3	CTH	APCDD1L	NA	NA	RGS12	NA	NA	NA	NA	NA	NA	NA
ANP32B	ACADM	DLX1	CYTH2	APEX1	NA	NA	SENP1	NA	NA	NA	NA	NA	NA	NA
AP1G2	ACAT1	DUSP2	DDX3X	APEX2	NA	NA	TBL1X	NA	NA	NA	NA	NA	NA	NA
APCDD1L	ACAT2	EIF4G1	DEPDC1	APOLD1	NA	NA	TCF7L2	NA	NA	NA	NA	NA	NA	NA
APEX1	ACBD6	ERCC3	DHX40	AQR	NA	NA	TXNRD1	NA	NA	NA	NA	NA	NA	NA
APEX2	ACD	ERRFI1	DLG1	ARHGAP32	NA	NA	ZNF367	NA	NA	NA	NA	NA	NA	NA
APOL4	ACIN1	FAM50B	DNAJB6	ARHGAP42	NA	NA	NA	NA	NA	NA	NA	NA	NA	NA
APOLD1	ACSL3	FANCE	DNAJC9	ARHGEF26	NA	NA	NA	NA	NA	NA	NA	NA	NA	NA
AQR	ACTC1	FANCL	DUSP1	ARID2	NA	NA	NA	NA	NA	NA	NA	NA	NA	NA
ARHGAP32	ACTL6A	FIBIN	DUSP2	ARID3B	NA	NA	NA	NA	NA	NA	NA	NA	NA	NA
ARHGAP42	ACTR5	FKBP15	EFR3A	ARL9	NA	NA	NA	NA	NA	NA	NA	NA	NA	NA
ARHGEF26	ADAL	GATA2	EGR1	ARRB2	NA	NA	NA	NA	NA	NA	NA	NA	NA	NA
ARID2	ADAMTS3	GLI2	EHBP1	ARSI	NA	NA	NA	NA	NA	NA	NA	NA	NA	NA
ARID3B	ADAMTS6	GPR161	EPB41L2	ASF1A	NA	NA	NA	NA	NA	NA	NA	NA	NA	NA
ARL9	ADARB1	GPT2	EPS8	ASF1B	NA	NA	NA	NA	NA	NA	NA	NA	NA	NA
ARRB2	ADAT2	HINT3	FCRL1	ATAD2	NA	NA	NA	NA	NA	NA	NA	NA	NA	NA
ARSI	ADCY3	HMGB1	FOS	ATG4C	NA	NA	NA	NA	NA	NA	NA	NA	NA	NA
ASF1A	ADNP	HTR5A	FRYL	AURKB	NA	NA	NA	NA	NA	NA	NA	NA	NA	NA
ASF1B	ADNP2	ING5	G3BP1	AUTS2	NA	NA	NA	NA	NA	NA	NA	NA	NA	NA
ATAD2	ADSL	KDM4A	GALNT5	AXL	NA	NA	NA	NA	NA	NA	NA	NA	NA	NA
ATG4C	AFG3L2	KLF11	GMPPA	B3GALNT1	NA	NA	NA	NA	NA	NA	NA	NA	NA	NA
AURKB	AGBL2	MAPK14	GOLPH3	B3GALT1	NA	NA	NA	NA	NA	NA	NA	NA	NA	NA
AUTS2	AGK	METTL2B	HPS1	B3GNT5	NA	NA	NA	NA	NA	NA	NA	NA	NA	NA
AXL	AGPAT4	METTL3	HSPA5	B4GALT5	NA	NA	NA	NA	NA	NA	NA	NA	NA	NA
B3GALNT1	AGPAT5	MIS12	HSPA8	B4GALT6	NA	NA	NA	NA	NA	NA	NA	NA	NA	NA
B3GALT1	AHI1	MOCOS	HSPD1	BCL2L11	NA	NA	NA	NA	NA	NA	NA	NA	NA	NA
B3GNT5	AKAP1	MSH6	IGF1	BCL3	NA	NA	NA	NA	NA	NA	NA	NA	NA	NA
B4GALT5	AKAP7	MTHFD2L	INPP5A	BCL9	NA	NA	NA	NA	NA	NA	NA	NA	NA	NA
B4GALT6	AKIRIN2	MTMR4	IQSEC2	BCLAF1	NA	NA	NA	NA	NA	NA	NA	NA	NA	NA
BCL2L11	AKR1C1	NAV1	MAGI2	BCS1L	NA	NA	NA	NA	NA	NA	NA	NA	NA	NA
BCL3	AKR1E2	NECAP1	MRPS27	BEND3	NA	NA	NA	NA	NA	NA	NA	NA	NA	NA
BCL9	ALDH1A3	NEDD9	NEDD9	BIRC5	NA	NA	NA	NA	NA	NA	NA	NA	NA	NA
BCLAF1	ALG14	NFIC	NR1D2	BLM	NA	NA	NA	NA	NA	NA	NA	NA	NA	NA
BCS1L	ALG6	NHSL1	OGFOD2	BNC1	NA	NA	NA	NA	NA	NA	NA	NA	NA	NA
BEND3	ALKBH1	NRG3	OR10C1	BRD7	NA	NA	NA	NA	NA	NA	NA	NA	NA	NA
BIRC5	ALKBH8	NTM	PAPSS1	BRIX1	NA	NA	NA	NA	NA	NA	NA	NA	NA	NA
BLM	ALMS1	NUDT16P1	PAX3	BUB1	NA	NA	NA	NA	NA	NA	NA	NA	NA	NA
BNC1	ALPK1	PPM1B	PDE4DIP	BUD13	NA	NA	NA	NA	NA	NA	NA	NA	NA	NA
BRD7	AMD1	PRPSAP2	PHEX	C10ORF82	NA	NA	NA	NA	NA	NA	NA	NA	NA	NA
BRIX1	AMMECR1	PTER	PICALM	C17ORF53	NA	NA	NA	NA	NA	NA	NA	NA	NA	NA
BUB1	AMOT	RAB36	PLVAP	C19ORF44	NA	NA	NA	NA	NA	NA	NA	NA	NA	NA
BUD13	AMPH	RASL11B	RAB6A	C19ORF48	NA	NA	NA	NA	NA	NA	NA	NA	NA	NA
C10ORF82	ANAPC1	RBFOX3	RAPGEF2	C1ORF112	NA	NA	NA	NA	NA	NA	NA	NA	NA	NA
C17ORF53	ANGEL2	RBM22	RASSF10	C1ORF21	NA	NA	NA	NA	NA	NA	NA	NA	NA	NA
C19ORF44	ANKRD11	RERE	RBM5	C1ORF220	NA	NA	NA	NA	NA	NA	NA	NA	NA	NA
C19ORF48	ANKRD13A	RFWD3	RGS16	C20ORF96	NA	NA	NA	NA	NA	NA	NA	NA	NA	NA
C1ORF112	ANKRD28	RGS12	RINL	C3ORF14	NA	NA	NA	NA	NA	NA	NA	NA	NA	NA
C1ORF21	ANKRD50	RGS16	RSRC2	C4ORF46	NA	NA	NA	NA	NA	NA	NA	NA	NA	NA
C1ORF220	ANLN	S1PR1	SCMH1	CABLES2	NA	NA	NA	NA	NA	NA	NA	NA	NA	NA
C20ORF96	ANP32A	SENP1	SEC24C	CACHD1	NA	NA	NA	NA	NA	NA	NA	NA	NA	NA
C3ORF14	ANP32B	SH3KBP1	SENP1	CACYBP	NA	NA	NA	NA	NA	NA	NA	NA	NA	NA
C4ORF46	ANP32E	SKI	SGK1	CAD	NA	NA	NA	NA	NA	NA	NA	NA	NA	NA
CABLES2	AP1G2	SLC38A2	SLC12A6	CALML4	NA	NA	NA	NA	NA	NA	NA	NA	NA	NA
CACHD1	AP4B1	SNAP23	SLC16A1	CAMK1G	NA	NA	NA	NA	NA	NA	NA	NA	NA	NA
CACYBP	AP4S1	SORBS2	SNAP23	CAMK4	NA	NA	NA	NA	NA	NA	NA	NA	NA	NA
CAD	APCDD1L	SPCS1	SNIP1	CASP2	NA	NA	NA	NA	NA	NA	NA	NA	NA	NA
CALML4	APEX1	ST6GAL1	ST6GAL1	CBX5	NA	NA	NA	NA	NA	NA	NA	NA	NA	NA
CAMK1G	APEX2	SUN1	STIP1	CCDC134	NA	NA	NA	NA	NA	NA	NA	NA	NA	NA
CAMK4	APH1A	SYBU	STRADA	CCDC138	NA	NA	NA	NA	NA	NA	NA	NA	NA	NA
CARHSP1	API5	TBL1X	TAB2	CCDC34	NA	NA	NA	NA	NA	NA	NA	NA	NA	NA
CASP2	APOBEC3F	TCF7L2	TCF7L2	CCDC58	NA	NA	NA	NA	NA	NA	NA	NA	NA	NA
CBX5	APOLD1	TOMM20	TFCP2L1	CCDC77	NA	NA	NA	NA	NA	NA	NA	NA	NA	NA
CCDC134	APOO	TTC9	THUMPD1	CCDC86	NA	NA	NA	NA	NA	NA	NA	NA	NA	NA
CCDC138	AQR	TUFT1	TMED2	CCDC89	NA	NA	NA	NA	NA	NA	NA	NA	NA	NA
CCDC3	ARAP3	TXNRD1	TRA2A	CCDC97	NA	NA	NA	NA	NA	NA	NA	NA	NA	NA
CCDC34	ARHGAP11A	UBTD2	TTC9	CCNA2	NA	NA	NA	NA	NA	NA	NA	NA	NA	NA
CCDC58	ARHGAP17	WNK4	TXNRD1	CCNB1	NA	NA	NA	NA	NA	NA	NA	NA	NA	NA
CCDC77	ARHGAP32	ZNF367	XPNPEP1	CCNB2	NA	NA	NA	NA	NA	NA	NA	NA	NA	NA
CCDC86	ARHGAP42	ZNF470	ZFHX2	CCNF	NA	NA	NA	NA	NA	NA	NA	NA	NA	NA
CCDC89	ARHGDIA	NA	ZFHX3	CD320	NA	NA	NA	NA	NA	NA	NA	NA	NA	NA
CCDC97	ARHGEF11	NA	ZNF292	CDC20	NA	NA	NA	NA	NA	NA	NA	NA	NA	NA
CCNA2	ARHGEF2	NA	ZNF470	CDC25A	NA	NA	NA	NA	NA	NA	NA	NA	NA	NA
CCNB1	ARHGEF26	NA	ZNF780A	CDC25B	NA	NA	NA	NA	NA	NA	NA	NA	NA	NA
CCNB2	ARID1A	NA	NA	CDC25C	NA	NA	NA	NA	NA	NA	NA	NA	NA	NA
CCNF	ARID1B	NA	NA	CDC45	NA	NA	NA	NA	NA	NA	NA	NA	NA	NA
CD320	ARID2	NA	NA	CDC6	NA	NA	NA	NA	NA	NA	NA	NA	NA	NA
CDC20	ARID3B	NA	NA	CDC7	NA	NA	NA	NA	NA	NA	NA	NA	NA	NA
CDC25A	ARL13B	NA	NA	CDCA2	NA	NA	NA	NA	NA	NA	NA	NA	NA	NA
CDC25B	ARL4A	NA	NA	CDCA3	NA	NA	NA	NA	NA	NA	NA	NA	NA	NA
CDC25C	ARL5A	NA	NA	CDCA4	NA	NA	NA	NA	NA	NA	NA	NA	NA	NA
CDC45	ARL6IP1	NA	NA	CDCA5	NA	NA	NA	NA	NA	NA	NA	NA	NA	NA
CDC6	ARL9	NA	NA	CDCA7	NA	NA	NA	NA	NA	NA	NA	NA	NA	NA
CDC7	ARMC10	NA	NA	CDCA7L	NA	NA	NA	NA	NA	NA	NA	NA	NA	NA
CDCA2	ARMC6	NA	NA	CDCA8	NA	NA	NA	NA	NA	NA	NA	NA	NA	NA
CDCA3	ARNTL2	NA	NA	CDK1	NA	NA	NA	NA	NA	NA	NA	NA	NA	NA
CDCA4	ARRB2	NA	NA	CDK16	NA	NA	NA	NA	NA	NA	NA	NA	NA	NA
CDCA5	ARSI	NA	NA	CDK4	NA	NA	NA	NA	NA	NA	NA	NA	NA	NA
CDCA7	ARSJ	NA	NA	CDKAL1	NA	NA	NA	NA	NA	NA	NA	NA	NA	NA
CDCA7L	ASF1A	NA	NA	CDKN1B	NA	NA	NA	NA	NA	NA	NA	NA	NA	NA
CDCA8	ASF1B	NA	NA	CDKN2C	NA	NA	NA	NA	NA	NA	NA	NA	NA	NA
CDK1	ASPM	NA	NA	CDKN3	NA	NA	NA	NA	NA	NA	NA	NA	NA	NA
CDK16	ASTE1	NA	NA	CENPA	NA	NA	NA	NA	NA	NA	NA	NA	NA	NA
CDK4	ASXL1	NA	NA	CENPF	NA	NA	NA	NA	NA	NA	NA	NA	NA	NA
CDKAL1	ASXL2	NA	NA	CENPH	NA	NA	NA	NA	NA	NA	NA	NA	NA	NA
CDKN1B	ATAD2	NA	NA	CENPJ	NA	NA	NA	NA	NA	NA	NA	NA	NA	NA
CDKN2AIPNL	ATAD2B	NA	NA	CENPM	NA	NA	NA	NA	NA	NA	NA	NA	NA	NA
CDKN2C	ATAD5	NA	NA	CENPO	NA	NA	NA	NA	NA	NA	NA	NA	NA	NA
CDKN3	ATAT1	NA	NA	CENPP	NA	NA	NA	NA	NA	NA	NA	NA	NA	NA
CDON	ATF1	NA	NA	CENPW	NA	NA	NA	NA	NA	NA	NA	NA	NA	NA
CENPA	ATF7IP	NA	NA	CEP250	NA	NA	NA	NA	NA	NA	NA	NA	NA	NA
CENPF	ATG4C	NA	NA	CEP55	NA	NA	NA	NA	NA	NA	NA	NA	NA	NA
CENPH	ATIC	NA	NA	CEP57	NA	NA	NA	NA	NA	NA	NA	NA	NA	NA
CENPJ	ATL2	NA	NA	CEP72	NA	NA	NA	NA	NA	NA	NA	NA	NA	NA
CENPM	ATN1	NA	NA	CHAF1A	NA	NA	NA	NA	NA	NA	NA	NA	NA	NA
CENPO	ATP11C	NA	NA	CHAF1B	NA	NA	NA	NA	NA	NA	NA	NA	NA	NA
CENPP	ATP2B1	NA	NA	CHEK1	NA	NA	NA	NA	NA	NA	NA	NA	NA	NA
CENPW	ATPAF1	NA	NA	CHEK2	NA	NA	NA	NA	NA	NA	NA	NA	NA	NA
CEP250	ATR	NA	NA	CHKA	NA	NA	NA	NA	NA	NA	NA	NA	NA	NA
CEP55	ATXN2L	NA	NA	CHRNA5	NA	NA	NA	NA	NA	NA	NA	NA	NA	NA
CEP57	AURKA	NA	NA	CHTF18	NA	NA	NA	NA	NA	NA	NA	NA	NA	NA
CEP72	AURKB	NA	NA	CIDEB	NA	NA	NA	NA	NA	NA	NA	NA	NA	NA
CHAF1A	AUTS2	NA	NA	CIT	NA	NA	NA	NA	NA	NA	NA	NA	NA	NA
CHAF1B	AXL	NA	NA	CKS1B	NA	NA	NA	NA	NA	NA	NA	NA	NA	NA
CHD7	B3GALNT1	NA	NA	CLN6	NA	NA	NA	NA	NA	NA	NA	NA	NA	NA
CHEK1	B3GALNT2	NA	NA	CNDP2	NA	NA	NA	NA	NA	NA	NA	NA	NA	NA
CHEK2	B3GALT1	NA	NA	CNKSR3	NA	NA	NA	NA	NA	NA	NA	NA	NA	NA
CHKA	B3GNT5	NA	NA	CNOT10	NA	NA	NA	NA	NA	NA	NA	NA	NA	NA
CHRNA5	B4GALT5	NA	NA	CNOT6	NA	NA	NA	NA	NA	NA	NA	NA	NA	NA
CHTF18	B4GALT6	NA	NA	CNOT6L	NA	NA	NA	NA	NA	NA	NA	NA	NA	NA
CIDEB	BAALC	NA	NA	COLEC12	NA	NA	NA	NA	NA	NA	NA	NA	NA	NA
CIT	BAG1	NA	NA	COMMD10	NA	NA	NA	NA	NA	NA	NA	NA	NA	NA
CKS1B	BAG2	NA	NA	COMMD4	NA	NA	NA	NA	NA	NA	NA	NA	NA	NA
CLN6	BANF1	NA	NA	COQ2	NA	NA	NA	NA	NA	NA	NA	NA	NA	NA
CNDP2	BARD1	NA	NA	COQ3	NA	NA	NA	NA	NA	NA	NA	NA	NA	NA
CNKSR3	BAZ1A	NA	NA	CORO1A	NA	NA	NA	NA	NA	NA	NA	NA	NA	NA
CNOT10	BAZ1B	NA	NA	CPNE2	NA	NA	NA	NA	NA	NA	NA	NA	NA	NA
CNOT6	BCCIP	NA	NA	CPSF4	NA	NA	NA	NA	NA	NA	NA	NA	NA	NA
CNOT6L	BCL2L11	NA	NA	CPSF6	NA	NA	NA	NA	NA	NA	NA	NA	NA	NA
COLEC12	BCL2L12	NA	NA	CPSF7	NA	NA	NA	NA	NA	NA	NA	NA	NA	NA
COMMD10	BCL3	NA	NA	CPXM1	NA	NA	NA	NA	NA	NA	NA	NA	NA	NA
COMMD4	BCL9	NA	NA	CRISPLD1	NA	NA	NA	NA	NA	NA	NA	NA	NA	NA
COQ2	BCLAF1	NA	NA	CSE1L	NA	NA	NA	NA	NA	NA	NA	NA	NA	NA
COQ3	BCS1L	NA	NA	CTCF	NA	NA	NA	NA	NA	NA	NA	NA	NA	NA
CORO1A	BEND3	NA	NA	CTDSPL2	NA	NA	NA	NA	NA	NA	NA	NA	NA	NA
CPNE2	BEND6	NA	NA	CTTNBP2	NA	NA	NA	NA	NA	NA	NA	NA	NA	NA
CPSF4	BHLHB9	NA	NA	CWF19L1	NA	NA	NA	NA	NA	NA	NA	NA	NA	NA
CPSF6	BIN3	NA	NA	CXCL12	NA	NA	NA	NA	NA	NA	NA	NA	NA	NA
CPSF7	BIRC5	NA	NA	CYB5RL	NA	NA	NA	NA	NA	NA	NA	NA	NA	NA
CPXM1	BLM	NA	NA	CYP1B1	NA	NA	NA	NA	NA	NA	NA	NA	NA	NA
CRISPLD1	BLMH	NA	NA	DAZAP1	NA	NA	NA	NA	NA	NA	NA	NA	NA	NA
CSE1L	BMPR1A	NA	NA	DBF4B	NA	NA	NA	NA	NA	NA	NA	NA	NA	NA
CTCF	BMPR1B	NA	NA	DCAF15	NA	NA	NA	NA	NA	NA	NA	NA	NA	NA
CTDSPL2	BNC1	NA	NA	DCLK2	NA	NA	NA	NA	NA	NA	NA	NA	NA	NA
CTTNBP2	BOD1	NA	NA	DCLRE1B	NA	NA	NA	NA	NA	NA	NA	NA	NA	NA
CWF19L1	BOP1	NA	NA	DCLRE1C	NA	NA	NA	NA	NA	NA	NA	NA	NA	NA
CXCL12	BRCA1	NA	NA	DCPS	NA	NA	NA	NA	NA	NA	NA	NA	NA	NA
CYB5R2	BRCA2	NA	NA	DENND4B	NA	NA	NA	NA	NA	NA	NA	NA	NA	NA
CYB5RL	BRD1	NA	NA	DEPDC1B	NA	NA	NA	NA	NA	NA	NA	NA	NA	NA
CYP1B1	BRD2	NA	NA	DET1	NA	NA	NA	NA	NA	NA	NA	NA	NA	NA
DAZAP1	BRD3	NA	NA	DHFR	NA	NA	NA	NA	NA	NA	NA	NA	NA	NA
DBF4B	BRD4	NA	NA	DHX30	NA	NA	NA	NA	NA	NA	NA	NA	NA	NA
DCAF15	BRD7	NA	NA	DHX33	NA	NA	NA	NA	NA	NA	NA	NA	NA	NA
DCLK2	BRD8	NA	NA	DHX9	NA	NA	NA	NA	NA	NA	NA	NA	NA	NA
DCLRE1B	BRD9	NA	NA	DIRAS3	NA	NA	NA	NA	NA	NA	NA	NA	NA	NA
DCLRE1C	BRIP1	NA	NA	DIS3L	NA	NA	NA	NA	NA	NA	NA	NA	NA	NA
DCPS	BRIX1	NA	NA	DLEU1	NA	NA	NA	NA	NA	NA	NA	NA	NA	NA
DENND4B	BRPF1	NA	NA	DMC1	NA	NA	NA	NA	NA	NA	NA	NA	NA	NA
DEPDC1B	BRPF3	NA	NA	DNA2	NA	NA	NA	NA	NA	NA	NA	NA	NA	NA
DES	BTBD11	NA	NA	DNAJA4	NA	NA	NA	NA	NA	NA	NA	NA	NA	NA
DET1	BTG3	NA	NA	DNAJC9	NA	NA	NA	NA	NA	NA	NA	NA	NA	NA
DHFR	BTN3A1	NA	NA	DNMT1	NA	NA	NA	NA	NA	NA	NA	NA	NA	NA
DHX30	BTN3A2	NA	NA	DOK5	NA	NA	NA	NA	NA	NA	NA	NA	NA	NA
DHX33	BUB1	NA	NA	DOK6	NA	NA	NA	NA	NA	NA	NA	NA	NA	NA
DHX9	BUB3	NA	NA	DOLPP1	NA	NA	NA	NA	NA	NA	NA	NA	NA	NA
DIRAS3	BUD13	NA	NA	DPF1	NA	NA	NA	NA	NA	NA	NA	NA	NA	NA
DIS3L	BUD31	NA	NA	DSC3	NA	NA	NA	NA	NA	NA	NA	NA	NA	NA
DLEU1	BYSL	NA	NA	DSG2	NA	NA	NA	NA	NA	NA	NA	NA	NA	NA
DMC1	C10ORF82	NA	NA	DSN1	NA	NA	NA	NA	NA	NA	NA	NA	NA	NA
DNA2	C11ORF49	NA	NA	DTL	NA	NA	NA	NA	NA	NA	NA	NA	NA	NA
DNAJA4	C11ORF58	NA	NA	DTYMK	NA	NA	NA	NA	NA	NA	NA	NA	NA	NA
DNAJC9	C12ORF45	NA	NA	DUS3L	NA	NA	NA	NA	NA	NA	NA	NA	NA	NA
DNM3	C12ORF65	NA	NA	DVL2	NA	NA	NA	NA	NA	NA	NA	NA	NA	NA
DNMT1	C12ORF66	NA	NA	E2F1	NA	NA	NA	NA	NA	NA	NA	NA	NA	NA
DOK5	C14ORF93	NA	NA	E2F8	NA	NA	NA	NA	NA	NA	NA	NA	NA	NA
DOK6	C15ORF41	NA	NA	EARS2	NA	NA	NA	NA	NA	NA	NA	NA	NA	NA
DOLPP1	C17ORF53	NA	NA	EBP	NA	NA	NA	NA	NA	NA	NA	NA	NA	NA
DPF1	C17ORF75	NA	NA	ECHDC3	NA	NA	NA	NA	NA	NA	NA	NA	NA	NA
DPPA4	C17ORF80	NA	NA	EEF1A1	NA	NA	NA	NA	NA	NA	NA	NA	NA	NA
DRD1	C17ORF97	NA	NA	EEFSEC	NA	NA	NA	NA	NA	NA	NA	NA	NA	NA
DSC3	C18ORF21	NA	NA	EFTUD2	NA	NA	NA	NA	NA	NA	NA	NA	NA	NA
DSG2	C18ORF54	NA	NA	EHMT2	NA	NA	NA	NA	NA	NA	NA	NA	NA	NA
DSN1	C19ORF44	NA	NA	ELAVL1	NA	NA	NA	NA	NA	NA	NA	NA	NA	NA
DTL	C19ORF48	NA	NA	ELF2	NA	NA	NA	NA	NA	NA	NA	NA	NA	NA
DTYMK	C1ORF109	NA	NA	EME1	NA	NA	NA	NA	NA	NA	NA	NA	NA	NA
DUS3L	C1ORF112	NA	NA	EMG1	NA	NA	NA	NA	NA	NA	NA	NA	NA	NA
DVL2	C1ORF21	NA	NA	ENPP2	NA	NA	NA	NA	NA	NA	NA	NA	NA	NA
E2F1	C1ORF220	NA	NA	EPB41	NA	NA	NA	NA	NA	NA	NA	NA	NA	NA
E2F8	C1ORF74	NA	NA	ERCC8	NA	NA	NA	NA	NA	NA	NA	NA	NA	NA
EARS2	C1QBP	NA	NA	ERI1	NA	NA	NA	NA	NA	NA	NA	NA	NA	NA
EBP	C20ORF96	NA	NA	ERI2	NA	NA	NA	NA	NA	NA	NA	NA	NA	NA
ECHDC3	C21ORF58	NA	NA	ERLIN1	NA	NA	NA	NA	NA	NA	NA	NA	NA	NA
EEF1A1	C21ORF91	NA	NA	ESCO2	NA	NA	NA	NA	NA	NA	NA	NA	NA	NA
EEFSEC	C2ORF42	NA	NA	ESPL1	NA	NA	NA	NA	NA	NA	NA	NA	NA	NA
EFTUD2	C2ORF69	NA	NA	EXO1	NA	NA	NA	NA	NA	NA	NA	NA	NA	NA
EHMT2	C3ORF14	NA	NA	EXOSC2	NA	NA	NA	NA	NA	NA	NA	NA	NA	NA
ELAVL1	C3ORF67	NA	NA	EXOSC3	NA	NA	NA	NA	NA	NA	NA	NA	NA	NA
ELF2	C4ORF33	NA	NA	EXOSC5	NA	NA	NA	NA	NA	NA	NA	NA	NA	NA
EME1	C4ORF46	NA	NA	EXOSC8	NA	NA	NA	NA	NA	NA	NA	NA	NA	NA
EMG1	C5	NA	NA	EXOSC9	NA	NA	NA	NA	NA	NA	NA	NA	NA	NA
ENDOD1	C5ORF34	NA	NA	EZH2	NA	NA	NA	NA	NA	NA	NA	NA	NA	NA
ENOX1	C7ORF26	NA	NA	FAF1	NA	NA	NA	NA	NA	NA	NA	NA	NA	NA
ENPP2	C7ORF31	NA	NA	FAM110B	NA	NA	NA	NA	NA	NA	NA	NA	NA	NA
EPB41	C8ORF33	NA	NA	FAM111B	NA	NA	NA	NA	NA	NA	NA	NA	NA	NA
EPHA3	C8ORF48	NA	NA	FAM129A	NA	NA	NA	NA	NA	NA	NA	NA	NA	NA
ERCC8	C8ORF59	NA	NA	FAM162B	NA	NA	NA	NA	NA	NA	NA	NA	NA	NA
ERI1	C9ORF64	NA	NA	FAM192A	NA	NA	NA	NA	NA	NA	NA	NA	NA	NA
ERI2	CA12	NA	NA	FAM49A	NA	NA	NA	NA	NA	NA	NA	NA	NA	NA
ERLIN1	CABLES2	NA	NA	FAM83B	NA	NA	NA	NA	NA	NA	NA	NA	NA	NA
ESCO2	CACHD1	NA	NA	FAM83D	NA	NA	NA	NA	NA	NA	NA	NA	NA	NA
ESPL1	CACYBP	NA	NA	FANCA	NA	NA	NA	NA	NA	NA	NA	NA	NA	NA
EXO1	CAD	NA	NA	FANCB	NA	NA	NA	NA	NA	NA	NA	NA	NA	NA
EXOSC2	CADPS2	NA	NA	FANCC	NA	NA	NA	NA	NA	NA	NA	NA	NA	NA
EXOSC3	CALCRL	NA	NA	FANCD2	NA	NA	NA	NA	NA	NA	NA	NA	NA	NA
EXOSC5	CALM3	NA	NA	FANCE	NA	NA	NA	NA	NA	NA	NA	NA	NA	NA
EXOSC8	CALML4	NA	NA	FANCG	NA	NA	NA	NA	NA	NA	NA	NA	NA	NA
EXOSC9	CAMK1G	NA	NA	FANCI	NA	NA	NA	NA	NA	NA	NA	NA	NA	NA
EZH2	CAMK4	NA	NA	FANCL	NA	NA	NA	NA	NA	NA	NA	NA	NA	NA
FAF1	CAMSAP1	NA	NA	FASN	NA	NA	NA	NA	NA	NA	NA	NA	NA	NA
FAM110B	CARD8	NA	NA	FAT3	NA	NA	NA	NA	NA	NA	NA	NA	NA	NA
FAM111B	CARM1	NA	NA	FBL	NA	NA	NA	NA	NA	NA	NA	NA	NA	NA
FAM129A	CASC3	NA	NA	FDXACB1	NA	NA	NA	NA	NA	NA	NA	NA	NA	NA
FAM13C	CASP2	NA	NA	FEN1	NA	NA	NA	NA	NA	NA	NA	NA	NA	NA
FAM162B	CASP6	NA	NA	FKBP4	NA	NA	NA	NA	NA	NA	NA	NA	NA	NA
FAM192A	CASP7	NA	NA	FLOT1	NA	NA	NA	NA	NA	NA	NA	NA	NA	NA
FAM49A	CASP8	NA	NA	FLVCR1	NA	NA	NA	NA	NA	NA	NA	NA	NA	NA
FAM83B	CASP8AP2	NA	NA	FOXM1	NA	NA	NA	NA	NA	NA	NA	NA	NA	NA
FAM83D	CBFB	NA	NA	FOXRED1	NA	NA	NA	NA	NA	NA	NA	NA	NA	NA
FANCA	CBL	NA	NA	FOXRED2	NA	NA	NA	NA	NA	NA	NA	NA	NA	NA
FANCB	CBLL1	NA	NA	FRZB	NA	NA	NA	NA	NA	NA	NA	NA	NA	NA
FANCC	CBR1	NA	NA	FSD1	NA	NA	NA	NA	NA	NA	NA	NA	NA	NA
FANCD2	CBX3	NA	NA	FST	NA	NA	NA	NA	NA	NA	NA	NA	NA	NA
FANCE	CBX5	NA	NA	GABRE	NA	NA	NA	NA	NA	NA	NA	NA	NA	NA
FANCG	CC2D2A	NA	NA	GALNT12	NA	NA	NA	NA	NA	NA	NA	NA	NA	NA
FANCI	CCAR1	NA	NA	GAS2L3	NA	NA	NA	NA	NA	NA	NA	NA	NA	NA
FANCL	CCDC117	NA	NA	GATA2	NA	NA	NA	NA	NA	NA	NA	NA	NA	NA
FASN	CCDC134	NA	NA	GCNT1	NA	NA	NA	NA	NA	NA	NA	NA	NA	NA
FAT3	CCDC137	NA	NA	GDAP1	NA	NA	NA	NA	NA	NA	NA	NA	NA	NA
FBL	CCDC138	NA	NA	GEMIN4	NA	NA	NA	NA	NA	NA	NA	NA	NA	NA
FDXACB1	CCDC14	NA	NA	GEMIN5	NA	NA	NA	NA	NA	NA	NA	NA	NA	NA
FEN1	CCDC15	NA	NA	GEN1	NA	NA	NA	NA	NA	NA	NA	NA	NA	NA
FGFRL1	CCDC150	NA	NA	GGA2	NA	NA	NA	NA	NA	NA	NA	NA	NA	NA
FKBP4	CCDC18	NA	NA	GIN1	NA	NA	NA	NA	NA	NA	NA	NA	NA	NA
FLOT1	CCDC34	NA	NA	GINS1	NA	NA	NA	NA	NA	NA	NA	NA	NA	NA
FLRT3	CCDC58	NA	NA	GINS2	NA	NA	NA	NA	NA	NA	NA	NA	NA	NA
FLVCR1	CCDC59	NA	NA	GINS3	NA	NA	NA	NA	NA	NA	NA	NA	NA	NA
FOXM1	CCDC66	NA	NA	GLB1L	NA	NA	NA	NA	NA	NA	NA	NA	NA	NA
FOXRED1	CCDC77	NA	NA	GLI3	NA	NA	NA	NA	NA	NA	NA	NA	NA	NA
FOXRED2	CCDC86	NA	NA	GMEB1	NA	NA	NA	NA	NA	NA	NA	NA	NA	NA
FRZB	CCDC89	NA	NA	GMNN	NA	NA	NA	NA	NA	NA	NA	NA	NA	NA
FSD1	CCDC97	NA	NA	GNE	NA	NA	NA	NA	NA	NA	NA	NA	NA	NA
FST	CCHCR1	NA	NA	GOLM1	NA	NA	NA	NA	NA	NA	NA	NA	NA	NA
GABRE	CCNA2	NA	NA	GPATCH4	NA	NA	NA	NA	NA	NA	NA	NA	NA	NA
GALNT12	CCNB1	NA	NA	GPC5	NA	NA	NA	NA	NA	NA	NA	NA	NA	NA
GAS2L3	CCNB2	NA	NA	GPC6	NA	NA	NA	NA	NA	NA	NA	NA	NA	NA
GATA2	CCNE2	NA	NA	GPHN	NA	NA	NA	NA	NA	NA	NA	NA	NA	NA
GATAD2B	CCNF	NA	NA	GPM6B	NA	NA	NA	NA	NA	NA	NA	NA	NA	NA
GCA	CCNI	NA	NA	GPR87	NA	NA	NA	NA	NA	NA	NA	NA	NA	NA
GCNT1	CCNJ	NA	NA	GPSM2	NA	NA	NA	NA	NA	NA	NA	NA	NA	NA
GDAP1	CCNL1	NA	NA	GPX7	NA	NA	NA	NA	NA	NA	NA	NA	NA	NA
GEMIN4	CCNT1	NA	NA	GRWD1	NA	NA	NA	NA	NA	NA	NA	NA	NA	NA
GEMIN5	CCT2	NA	NA	GSTM5	NA	NA	NA	NA	NA	NA	NA	NA	NA	NA
GEN1	CCT4	NA	NA	GTF3C2	NA	NA	NA	NA	NA	NA	NA	NA	NA	NA
GGA2	CCT5	NA	NA	GTF3C5	NA	NA	NA	NA	NA	NA	NA	NA	NA	NA
GIN1	CCT6A	NA	NA	GTSE1	NA	NA	NA	NA	NA	NA	NA	NA	NA	NA
GINS1	CCT7	NA	NA	GUF1	NA	NA	NA	NA	NA	NA	NA	NA	NA	NA
GINS2	CD320	NA	NA	GUSB	NA	NA	NA	NA	NA	NA	NA	NA	NA	NA
GINS3	CD3EAP	NA	NA	H1FX	NA	NA	NA	NA	NA	NA	NA	NA	NA	NA
GLB1L	CDAN1	NA	NA	H2AFV	NA	NA	NA	NA	NA	NA	NA	NA	NA	NA
GLI3	CDC20	NA	NA	H2AFX	NA	NA	NA	NA	NA	NA	NA	NA	NA	NA
GMEB1	CDC23	NA	NA	H2AFY2	NA	NA	NA	NA	NA	NA	NA	NA	NA	NA
GMNN	CDC25A	NA	NA	H2AFZ	NA	NA	NA	NA	NA	NA	NA	NA	NA	NA
GNE	CDC25B	NA	NA	H3F3B	NA	NA	NA	NA	NA	NA	NA	NA	NA	NA
GOLM1	CDC25C	NA	NA	HADH	NA	NA	NA	NA	NA	NA	NA	NA	NA	NA
GPATCH4	CDC42EP1	NA	NA	HAUS1	NA	NA	NA	NA	NA	NA	NA	NA	NA	NA
GPC5	CDC42EP4	NA	NA	HAUS4	NA	NA	NA	NA	NA	NA	NA	NA	NA	NA
GPC6	CDC45	NA	NA	HAUS5	NA	NA	NA	NA	NA	NA	NA	NA	NA	NA
GPHN	CDC5L	NA	NA	HAUS8	NA	NA	NA	NA	NA	NA	NA	NA	NA	NA
GPM6B	CDC6	NA	NA	HCFC1	NA	NA	NA	NA	NA	NA	NA	NA	NA	NA
GPR19	CDC7	NA	NA	HCFC1R1	NA	NA	NA	NA	NA	NA	NA	NA	NA	NA
GPR87	CDCA2	NA	NA	HDAC1	NA	NA	NA	NA	NA	NA	NA	NA	NA	NA
GPSM2	CDCA3	NA	NA	HDGF	NA	NA	NA	NA	NA	NA	NA	NA	NA	NA
GPX7	CDCA4	NA	NA	HEATR6	NA	NA	NA	NA	NA	NA	NA	NA	NA	NA
GRWD1	CDCA5	NA	NA	HELLS	NA	NA	NA	NA	NA	NA	NA	NA	NA	NA
GSTM5	CDCA7	NA	NA	HIPK2	NA	NA	NA	NA	NA	NA	NA	NA	NA	NA
GSTO2	CDCA7L	NA	NA	HIRA	NA	NA	NA	NA	NA	NA	NA	NA	NA	NA
GTF3C2	CDCA8	NA	NA	HIRIP3	NA	NA	NA	NA	NA	NA	NA	NA	NA	NA
GTF3C5	CDH24	NA	NA	HIST1H1A	NA	NA	NA	NA	NA	NA	NA	NA	NA	NA
GTSE1	CDH6	NA	NA	HIST1H1B	NA	NA	NA	NA	NA	NA	NA	NA	NA	NA
GUF1	CDK1	NA	NA	HIST1H1C	NA	NA	NA	NA	NA	NA	NA	NA	NA	NA
GUSB	CDK11A	NA	NA	HIST1H1D	NA	NA	NA	NA	NA	NA	NA	NA	NA	NA
H1FX	CDK11B	NA	NA	HIST1H1E	NA	NA	NA	NA	NA	NA	NA	NA	NA	NA
H2AFV	CDK14	NA	NA	HIST1H2AB	NA	NA	NA	NA	NA	NA	NA	NA	NA	NA
H2AFX	CDK16	NA	NA	HIST1H2AE	NA	NA	NA	NA	NA	NA	NA	NA	NA	NA
H2AFY2	CDK17	NA	NA	HIST1H2AH	NA	NA	NA	NA	NA	NA	NA	NA	NA	NA
H2AFZ	CDK2	NA	NA	HIST1H2AI	NA	NA	NA	NA	NA	NA	NA	NA	NA	NA
H3F3B	CDK4	NA	NA	HIST1H2AJ	NA	NA	NA	NA	NA	NA	NA	NA	NA	NA
HADH	CDK5RAP2	NA	NA	HIST1H2AK	NA	NA	NA	NA	NA	NA	NA	NA	NA	NA
HAUS1	CDKAL1	NA	NA	HIST1H2AL	NA	NA	NA	NA	NA	NA	NA	NA	NA	NA
HAUS4	CDKL1	NA	NA	HIST1H2AM	NA	NA	NA	NA	NA	NA	NA	NA	NA	NA
HAUS5	CDKN1B	NA	NA	HIST1H2BB	NA	NA	NA	NA	NA	NA	NA	NA	NA	NA
HAUS8	CDKN2AIP	NA	NA	HIST1H2BC	NA	NA	NA	NA	NA	NA	NA	NA	NA	NA
HCFC1	CDKN2C	NA	NA	HIST1H2BE	NA	NA	NA	NA	NA	NA	NA	NA	NA	NA
HCFC1R1	CDKN3	NA	NA	HIST1H2BF	NA	NA	NA	NA	NA	NA	NA	NA	NA	NA
HDAC1	CDO1	NA	NA	HIST1H2BG	NA	NA	NA	NA	NA	NA	NA	NA	NA	NA
HDGF	CDT1	NA	NA	HIST1H2BH	NA	NA	NA	NA	NA	NA	NA	NA	NA	NA
HEATR6	CELF1	NA	NA	HIST1H2BI	NA	NA	NA	NA	NA	NA	NA	NA	NA	NA
HELLS	CENPA	NA	NA	HIST1H2BL	NA	NA	NA	NA	NA	NA	NA	NA	NA	NA
HIPK2	CENPE	NA	NA	HIST1H2BM	NA	NA	NA	NA	NA	NA	NA	NA	NA	NA
HIRA	CENPF	NA	NA	HIST1H2BO	NA	NA	NA	NA	NA	NA	NA	NA	NA	NA
HIRIP3	CENPH	NA	NA	HIST1H3A	NA	NA	NA	NA	NA	NA	NA	NA	NA	NA
HIST1H1A	CENPI	NA	NA	HIST1H3B	NA	NA	NA	NA	NA	NA	NA	NA	NA	NA
HIST1H1B	CENPJ	NA	NA	HIST1H3C	NA	NA	NA	NA	NA	NA	NA	NA	NA	NA
HIST1H1C	CENPK	NA	NA	HIST1H3E	NA	NA	NA	NA	NA	NA	NA	NA	NA	NA
HIST1H1D	CENPL	NA	NA	HIST1H3F	NA	NA	NA	NA	NA	NA	NA	NA	NA	NA
HIST1H1E	CENPM	NA	NA	HIST1H3G	NA	NA	NA	NA	NA	NA	NA	NA	NA	NA
HIST1H2AB	CENPN	NA	NA	HIST1H3H	NA	NA	NA	NA	NA	NA	NA	NA	NA	NA
HIST1H2AE	CENPO	NA	NA	HIST1H3I	NA	NA	NA	NA	NA	NA	NA	NA	NA	NA
HIST1H2AH	CENPP	NA	NA	HIST1H3J	NA	NA	NA	NA	NA	NA	NA	NA	NA	NA
HIST1H2AI	CENPQ	NA	NA	HIST1H4A	NA	NA	NA	NA	NA	NA	NA	NA	NA	NA
HIST1H2AJ	CENPV	NA	NA	HIST1H4B	NA	NA	NA	NA	NA	NA	NA	NA	NA	NA
HIST1H2AK	CENPW	NA	NA	HIST1H4C	NA	NA	NA	NA	NA	NA	NA	NA	NA	NA
HIST1H2AL	CEP120	NA	NA	HIST1H4D	NA	NA	NA	NA	NA	NA	NA	NA	NA	NA
HIST1H2AM	CEP135	NA	NA	HIST1H4I	NA	NA	NA	NA	NA	NA	NA	NA	NA	NA
HIST1H2BB	CEP152	NA	NA	HIST1H4L	NA	NA	NA	NA	NA	NA	NA	NA	NA	NA
HIST1H2BC	CEP192	NA	NA	HIST2H2AB	NA	NA	NA	NA	NA	NA	NA	NA	NA	NA
HIST1H2BE	CEP250	NA	NA	HIST2H2AC	NA	NA	NA	NA	NA	NA	NA	NA	NA	NA
HIST1H2BF	CEP55	NA	NA	HIST3H2A	NA	NA	NA	NA	NA	NA	NA	NA	NA	NA
HIST1H2BG	CEP57	NA	NA	HIST3H2BB	NA	NA	NA	NA	NA	NA	NA	NA	NA	NA
HIST1H2BH	CEP70	NA	NA	HJURP	NA	NA	NA	NA	NA	NA	NA	NA	NA	NA
HIST1H2BI	CEP72	NA	NA	HMBS	NA	NA	NA	NA	NA	NA	NA	NA	NA	NA
HIST1H2BL	CEP76	NA	NA	HMGB2	NA	NA	NA	NA	NA	NA	NA	NA	NA	NA
HIST1H2BM	CEP78	NA	NA	HMGB3	NA	NA	NA	NA	NA	NA	NA	NA	NA	NA
HIST1H2BO	CEP97	NA	NA	HMGN1	NA	NA	NA	NA	NA	NA	NA	NA	NA	NA
HIST1H3A	CERK	NA	NA	HMGN2	NA	NA	NA	NA	NA	NA	NA	NA	NA	NA
HIST1H3B	CHAC2	NA	NA	HMGXB4	NA	NA	NA	NA	NA	NA	NA	NA	NA	NA
HIST1H3C	CHAF1A	NA	NA	HNRNPD	NA	NA	NA	NA	NA	NA	NA	NA	NA	NA
HIST1H3E	CHAF1B	NA	NA	HNRNPF	NA	NA	NA	NA	NA	NA	NA	NA	NA	NA
HIST1H3F	CHCHD2	NA	NA	HNRNPL	NA	NA	NA	NA	NA	NA	NA	NA	NA	NA
HIST1H3G	CHCHD3	NA	NA	HNRNPM	NA	NA	NA	NA	NA	NA	NA	NA	NA	NA
HIST1H3H	CHD1	NA	NA	HNRNPUL1	NA	NA	NA	NA	NA	NA	NA	NA	NA	NA
HIST1H3I	CHD1L	NA	NA	HOXA2	NA	NA	NA	NA	NA	NA	NA	NA	NA	NA
HIST1H3J	CHD3	NA	NA	HOXA3	NA	NA	NA	NA	NA	NA	NA	NA	NA	NA
HIST1H4A	CHD4	NA	NA	HOXA4	NA	NA	NA	NA	NA	NA	NA	NA	NA	NA
HIST1H4B	CHEK1	NA	NA	HOXA5	NA	NA	NA	NA	NA	NA	NA	NA	NA	NA
HIST1H4C	CHEK2	NA	NA	HOXA6	NA	NA	NA	NA	NA	NA	NA	NA	NA	NA
HIST1H4D	CHERP	NA	NA	HOXA7	NA	NA	NA	NA	NA	NA	NA	NA	NA	NA
HIST1H4I	CHKA	NA	NA	HOXC5	NA	NA	NA	NA	NA	NA	NA	NA	NA	NA
HIST1H4L	CHRAC1	NA	NA	HPDL	NA	NA	NA	NA	NA	NA	NA	NA	NA	NA
HIST2H2AB	CHRM2	NA	NA	HPS4	NA	NA	NA	NA	NA	NA	NA	NA	NA	NA
HIST2H2AC	CHRNA5	NA	NA	HSF2	NA	NA	NA	NA	NA	NA	NA	NA	NA	NA
HIST3H2A	CHTF18	NA	NA	HSPB11	NA	NA	NA	NA	NA	NA	NA	NA	NA	NA
HIST3H2BB	CIDEB	NA	NA	HSPBAP1	NA	NA	NA	NA	NA	NA	NA	NA	NA	NA
HJURP	CISD2	NA	NA	HSPD1	NA	NA	NA	NA	NA	NA	NA	NA	NA	NA
HMBS	CIT	NA	NA	HTATSF1	NA	NA	NA	NA	NA	NA	NA	NA	NA	NA
HMGB2	CKAP2	NA	NA	HYLS1	NA	NA	NA	NA	NA	NA	NA	NA	NA	NA
HMGB3	CKAP2L	NA	NA	IGSF10	NA	NA	NA	NA	NA	NA	NA	NA	NA	NA
HMGN1	CKAP5	NA	NA	IKZF4	NA	NA	NA	NA	NA	NA	NA	NA	NA	NA
HMGN2	CKS1B	NA	NA	IL18R1	NA	NA	NA	NA	NA	NA	NA	NA	NA	NA
HMGXB4	CKS2	NA	NA	IL1R1	NA	NA	NA	NA	NA	NA	NA	NA	NA	NA
HNRNPD	CLASRP	NA	NA	IL31RA	NA	NA	NA	NA	NA	NA	NA	NA	NA	NA
HNRNPF	CLDN11	NA	NA	IL6R	NA	NA	NA	NA	NA	NA	NA	NA	NA	NA
HNRNPL	CLK2	NA	NA	INTS2	NA	NA	NA	NA	NA	NA	NA	NA	NA	NA
HNRNPM	CLN6	NA	NA	INTS7	NA	NA	NA	NA	NA	NA	NA	NA	NA	NA
HNRNPUL1	CLNS1A	NA	NA	IPO4	NA	NA	NA	NA	NA	NA	NA	NA	NA	NA
HOXA2	CLPB	NA	NA	IPO9	NA	NA	NA	NA	NA	NA	NA	NA	NA	NA
HOXA3	CLSPN	NA	NA	IQCC	NA	NA	NA	NA	NA	NA	NA	NA	NA	NA
HOXA4	CLUAP1	NA	NA	IQGAP3	NA	NA	NA	NA	NA	NA	NA	NA	NA	NA
HOXA5	CMC1	NA	NA	IRAK3	NA	NA	NA	NA	NA	NA	NA	NA	NA	NA
HOXA6	CNBP	NA	NA	ISLR	NA	NA	NA	NA	NA	NA	NA	NA	NA	NA
HOXA7	CNDP2	NA	NA	ITGB3BP	NA	NA	NA	NA	NA	NA	NA	NA	NA	NA
HOXB8	CNKSR3	NA	NA	KAT5	NA	NA	NA	NA	NA	NA	NA	NA	NA	NA
HOXC5	CNOT1	NA	NA	KCNE4	NA	NA	NA	NA	NA	NA	NA	NA	NA	NA
HPDL	CNOT10	NA	NA	KCNIP3	NA	NA	NA	NA	NA	NA	NA	NA	NA	NA
HPS4	CNOT3	NA	NA	KHDRBS1	NA	NA	NA	NA	NA	NA	NA	NA	NA	NA
HSF2	CNOT6	NA	NA	KHK	NA	NA	NA	NA	NA	NA	NA	NA	NA	NA
HSPB11	CNOT6L	NA	NA	KHSRP	NA	NA	NA	NA	NA	NA	NA	NA	NA	NA
HSPBAP1	CNOT7	NA	NA	KIAA0586	NA	NA	NA	NA	NA	NA	NA	NA	NA	NA
HSPD1	CNRIP1	NA	NA	KIF11	NA	NA	NA	NA	NA	NA	NA	NA	NA	NA
HTATSF1	CNTLN	NA	NA	KIF15	NA	NA	NA	NA	NA	NA	NA	NA	NA	NA
HYLS1	CNTROB	NA	NA	KIF18B	NA	NA	NA	NA	NA	NA	NA	NA	NA	NA
IGSF10	COASY	NA	NA	KIF20A	NA	NA	NA	NA	NA	NA	NA	NA	NA	NA
IKZF4	COG7	NA	NA	KIF22	NA	NA	NA	NA	NA	NA	NA	NA	NA	NA
IL18R1	COIL	NA	NA	KIF24	NA	NA	NA	NA	NA	NA	NA	NA	NA	NA
IL1R1	COL12A1	NA	NA	KIF2C	NA	NA	NA	NA	NA	NA	NA	NA	NA	NA
IL31RA	COL6A3	NA	NA	KIF4A	NA	NA	NA	NA	NA	NA	NA	NA	NA	NA
IL6R	COLEC12	NA	NA	KIFC1	NA	NA	NA	NA	NA	NA	NA	NA	NA	NA
INTS2	COMMD10	NA	NA	KLF3	NA	NA	NA	NA	NA	NA	NA	NA	NA	NA
INTS7	COMMD4	NA	NA	KNTC1	NA	NA	NA	NA	NA	NA	NA	NA	NA	NA
IPO4	COQ2	NA	NA	KRT19	NA	NA	NA	NA	NA	NA	NA	NA	NA	NA
IPO9	COQ3	NA	NA	KRT7	NA	NA	NA	NA	NA	NA	NA	NA	NA	NA
IQCC	COQ7	NA	NA	L2HGDH	NA	NA	NA	NA	NA	NA	NA	NA	NA	NA
IQGAP3	CORO1A	NA	NA	LAS1L	NA	NA	NA	NA	NA	NA	NA	NA	NA	NA
IRAK3	COX10	NA	NA	LBR	NA	NA	NA	NA	NA	NA	NA	NA	NA	NA
ISLR	COX18	NA	NA	LCMT2	NA	NA	NA	NA	NA	NA	NA	NA	NA	NA
ITGB3BP	CPEB1	NA	NA	LDHB	NA	NA	NA	NA	NA	NA	NA	NA	NA	NA
IVNS1ABP	CPNE2	NA	NA	LIAS	NA	NA	NA	NA	NA	NA	NA	NA	NA	NA
KALRN	CPS1	NA	NA	LIFR	NA	NA	NA	NA	NA	NA	NA	NA	NA	NA
KAT5	CPSF2	NA	NA	LIG1	NA	NA	NA	NA	NA	NA	NA	NA	NA	NA
KCNE4	CPSF3	NA	NA	LIG3	NA	NA	NA	NA	NA	NA	NA	NA	NA	NA
KCNH5	CPSF4	NA	NA	LIN52	NA	NA	NA	NA	NA	NA	NA	NA	NA	NA
KCNIP3	CPSF6	NA	NA	LIN9	NA	NA	NA	NA	NA	NA	NA	NA	NA	NA
KCTD12	CPSF7	NA	NA	LMNB1	NA	NA	NA	NA	NA	NA	NA	NA	NA	NA
KHDRBS1	CPXM1	NA	NA	LMNB2	NA	NA	NA	NA	NA	NA	NA	NA	NA	NA
KHK	CRABP2	NA	NA	LMO4	NA	NA	NA	NA	NA	NA	NA	NA	NA	NA
KHSRP	CREB1	NA	NA	LONRF1	NA	NA	NA	NA	NA	NA	NA	NA	NA	NA
KIAA0586	CREB3L2	NA	NA	LRRC49	NA	NA	NA	NA	NA	NA	NA	NA	NA	NA
KIF11	CREBBP	NA	NA	LRRC61	NA	NA	NA	NA	NA	NA	NA	NA	NA	NA
KIF15	CREBZF	NA	NA	LRRC8B	NA	NA	NA	NA	NA	NA	NA	NA	NA	NA
KIF18B	CRISPLD1	NA	NA	LRRCC1	NA	NA	NA	NA	NA	NA	NA	NA	NA	NA
KIF20A	CRNKL1	NA	NA	LRRN1	NA	NA	NA	NA	NA	NA	NA	NA	NA	NA
KIF21A	CROT	NA	NA	LSM2	NA	NA	NA	NA	NA	NA	NA	NA	NA	NA
KIF22	CS	NA	NA	MAB21L2	NA	NA	NA	NA	NA	NA	NA	NA	NA	NA
KIF24	CSE1L	NA	NA	MAD2L1	NA	NA	NA	NA	NA	NA	NA	NA	NA	NA
KIF2C	CSNK2A2	NA	NA	MAD2L2	NA	NA	NA	NA	NA	NA	NA	NA	NA	NA
KIF4A	CSTF1	NA	NA	MAOB	NA	NA	NA	NA	NA	NA	NA	NA	NA	NA
KIFC1	CSTF2	NA	NA	MAP2K6	NA	NA	NA	NA	NA	NA	NA	NA	NA	NA
KLF3	CSTF2T	NA	NA	MAT2B	NA	NA	NA	NA	NA	NA	NA	NA	NA	NA
KNTC1	CTBP1	NA	NA	MBNL3	NA	NA	NA	NA	NA	NA	NA	NA	NA	NA
KRT19	CTBP2	NA	NA	MBOAT1	NA	NA	NA	NA	NA	NA	NA	NA	NA	NA
KRT7	CTCF	NA	NA	MCM10	NA	NA	NA	NA	NA	NA	NA	NA	NA	NA
L2HGDH	CTDNEP1	NA	NA	MCM2	NA	NA	NA	NA	NA	NA	NA	NA	NA	NA
LAS1L	CTDSP2	NA	NA	MCM3	NA	NA	NA	NA	NA	NA	NA	NA	NA	NA
LBR	CTDSPL2	NA	NA	MCM4	NA	NA	NA	NA	NA	NA	NA	NA	NA	NA
LCMT2	CTNNAL1	NA	NA	MCM5	NA	NA	NA	NA	NA	NA	NA	NA	NA	NA
LDHB	CTNNBL1	NA	NA	MCM6	NA	NA	NA	NA	NA	NA	NA	NA	NA	NA
LIAS	CTPS2	NA	NA	MCM7	NA	NA	NA	NA	NA	NA	NA	NA	NA	NA
LIFR	CTSC	NA	NA	MCM8	NA	NA	NA	NA	NA	NA	NA	NA	NA	NA
LIG1	CTTNBP2	NA	NA	MCRS1	NA	NA	NA	NA	NA	NA	NA	NA	NA	NA
LIG3	CUL1	NA	NA	MDC1	NA	NA	NA	NA	NA	NA	NA	NA	NA	NA
LIN52	CUTC	NA	NA	MDK	NA	NA	NA	NA	NA	NA	NA	NA	NA	NA
LIN9	CWC22	NA	NA	MDN1	NA	NA	NA	NA	NA	NA	NA	NA	NA	NA
LMNB1	CWC25	NA	NA	MED1	NA	NA	NA	NA	NA	NA	NA	NA	NA	NA
LMNB2	CWC27	NA	NA	MID1	NA	NA	NA	NA	NA	NA	NA	NA	NA	NA
LMO4	CWF19L1	NA	NA	MID2	NA	NA	NA	NA	NA	NA	NA	NA	NA	NA
LONRF1	CWF19L2	NA	NA	MIS12	NA	NA	NA	NA	NA	NA	NA	NA	NA	NA
LRRC49	CXCL12	NA	NA	MKI67	NA	NA	NA	NA	NA	NA	NA	NA	NA	NA
LRRC61	CXXC1	NA	NA	MKS1	NA	NA	NA	NA	NA	NA	NA	NA	NA	NA
LRRC8B	CYB5RL	NA	NA	MLH1	NA	NA	NA	NA	NA	NA	NA	NA	NA	NA
LRRCC1	CYP1B1	NA	NA	MLPH	NA	NA	NA	NA	NA	NA	NA	NA	NA	NA
LRRN1	DARS	NA	NA	MMACHC	NA	NA	NA	NA	NA	NA	NA	NA	NA	NA
LSM2	DARS2	NA	NA	MND1	NA	NA	NA	NA	NA	NA	NA	NA	NA	NA
MAB21L2	DAZAP1	NA	NA	MNS1	NA	NA	NA	NA	NA	NA	NA	NA	NA	NA
MAD2L1	DAZAP2	NA	NA	MRPL48	NA	NA	NA	NA	NA	NA	NA	NA	NA	NA
MAD2L2	DBF4	NA	NA	MRPL9	NA	NA	NA	NA	NA	NA	NA	NA	NA	NA
MAOA	DBF4B	NA	NA	MRPS27	NA	NA	NA	NA	NA	NA	NA	NA	NA	NA
MAOB	DBI	NA	NA	MRPS31	NA	NA	NA	NA	NA	NA	NA	NA	NA	NA
MAP2K6	DCAF12	NA	NA	MRRF	NA	NA	NA	NA	NA	NA	NA	NA	NA	NA
MAT2B	DCAF15	NA	NA	MRTO4	NA	NA	NA	NA	NA	NA	NA	NA	NA	NA
MBD4	DCAF16	NA	NA	MSH2	NA	NA	NA	NA	NA	NA	NA	NA	NA	NA
MBNL3	DCAF17	NA	NA	MSH6	NA	NA	NA	NA	NA	NA	NA	NA	NA	NA
MBOAT1	DCLK2	NA	NA	MT1A	NA	NA	NA	NA	NA	NA	NA	NA	NA	NA
MBOAT2	DCLRE1A	NA	NA	MTA2	NA	NA	NA	NA	NA	NA	NA	NA	NA	NA
MCM10	DCLRE1B	NA	NA	MTHFD1	NA	NA	NA	NA	NA	NA	NA	NA	NA	NA
MCM2	DCLRE1C	NA	NA	MTMR4	NA	NA	NA	NA	NA	NA	NA	NA	NA	NA
MCM3	DCP2	NA	NA	MXD3	NA	NA	NA	NA	NA	NA	NA	NA	NA	NA
MCM4	DCPS	NA	NA	MYBL2	NA	NA	NA	NA	NA	NA	NA	NA	NA	NA
MCM5	DCUN1D5	NA	NA	MYO19	NA	NA	NA	NA	NA	NA	NA	NA	NA	NA
MCM6	DDX10	NA	NA	MYPN	NA	NA	NA	NA	NA	NA	NA	NA	NA	NA
MCM7	DDX17	NA	NA	NARS2	NA	NA	NA	NA	NA	NA	NA	NA	NA	NA
MCM8	DDX18	NA	NA	NASP	NA	NA	NA	NA	NA	NA	NA	NA	NA	NA
MCRS1	DDX21	NA	NA	NAT10	NA	NA	NA	NA	NA	NA	NA	NA	NA	NA
MDC1	DDX23	NA	NA	NCAPD2	NA	NA	NA	NA	NA	NA	NA	NA	NA	NA
MDGA1	DDX27	NA	NA	NCAPD3	NA	NA	NA	NA	NA	NA	NA	NA	NA	NA
MDK	DDX31	NA	NA	NCAPG2	NA	NA	NA	NA	NA	NA	NA	NA	NA	NA
MDN1	DDX46	NA	NA	NCAPH	NA	NA	NA	NA	NA	NA	NA	NA	NA	NA
MED1	DDX54	NA	NA	NCOA5	NA	NA	NA	NA	NA	NA	NA	NA	NA	NA
MED12L	DDX55	NA	NA	NDC80	NA	NA	NA	NA	NA	NA	NA	NA	NA	NA
MID1	DDX56	NA	NA	NDE1	NA	NA	NA	NA	NA	NA	NA	NA	NA	NA
MID2	DDX60	NA	NA	NDP	NA	NA	NA	NA	NA	NA	NA	NA	NA	NA
MIS12	DEK	NA	NA	NEFH	NA	NA	NA	NA	NA	NA	NA	NA	NA	NA
MKI67	DENND1B	NA	NA	NEIL3	NA	NA	NA	NA	NA	NA	NA	NA	NA	NA
MKS1	DENND4B	NA	NA	NEK2	NA	NA	NA	NA	NA	NA	NA	NA	NA	NA
MLH1	DEPDC1	NA	NA	NETO2	NA	NA	NA	NA	NA	NA	NA	NA	NA	NA
MLPH	DEPDC1B	NA	NA	NFIA	NA	NA	NA	NA	NA	NA	NA	NA	NA	NA
MMACHC	DEPDC4	NA	NA	NFIB	NA	NA	NA	NA	NA	NA	NA	NA	NA	NA
MND1	DEPDC5	NA	NA	NFYA	NA	NA	NA	NA	NA	NA	NA	NA	NA	NA
MNS1	DERA	NA	NA	NHEJ1	NA	NA	NA	NA	NA	NA	NA	NA	NA	NA
MRPL48	DET1	NA	NA	NHP2	NA	NA	NA	NA	NA	NA	NA	NA	NA	NA
MRPL9	DGKD	NA	NA	NIF3L1	NA	NA	NA	NA	NA	NA	NA	NA	NA	NA
MRPS27	DHFR	NA	NA	NNAT	NA	NA	NA	NA	NA	NA	NA	NA	NA	NA
MRPS31	DHODH	NA	NA	NOC4L	NA	NA	NA	NA	NA	NA	NA	NA	NA	NA
MRRF	DHPS	NA	NA	NOD1	NA	NA	NA	NA	NA	NA	NA	NA	NA	NA
MRTO4	DHX15	NA	NA	NOL12	NA	NA	NA	NA	NA	NA	NA	NA	NA	NA
MSH2	DHX30	NA	NA	NOL9	NA	NA	NA	NA	NA	NA	NA	NA	NA	NA
MSH6	DHX33	NA	NA	NOLC1	NA	NA	NA	NA	NA	NA	NA	NA	NA	NA
MT1A	DHX35	NA	NA	NONO	NA	NA	NA	NA	NA	NA	NA	NA	NA	NA
MTA2	DHX36	NA	NA	NOV	NA	NA	NA	NA	NA	NA	NA	NA	NA	NA
MTHFD1	DHX37	NA	NA	NOVA1	NA	NA	NA	NA	NA	NA	NA	NA	NA	NA
MTMR4	DHX38	NA	NA	NPRL3	NA	NA	NA	NA	NA	NA	NA	NA	NA	NA
MXD3	DHX57	NA	NA	NQO1	NA	NA	NA	NA	NA	NA	NA	NA	NA	NA
MYBL2	DHX8	NA	NA	NQO2	NA	NA	NA	NA	NA	NA	NA	NA	NA	NA
MYO19	DHX9	NA	NA	NR2C2AP	NA	NA	NA	NA	NA	NA	NA	NA	NA	NA
MYPN	DIAPH3	NA	NA	NR2F1	NA	NA	NA	NA	NA	NA	NA	NA	NA	NA
NAP1L3	DIDO1	NA	NA	NRM	NA	NA	NA	NA	NA	NA	NA	NA	NA	NA
NARS2	DIRAS3	NA	NA	NRP1	NA	NA	NA	NA	NA	NA	NA	NA	NA	NA
NASP	DIS3L	NA	NA	NSL1	NA	NA	NA	NA	NA	NA	NA	NA	NA	NA
NAT10	DIS3L2	NA	NA	NSMCE4A	NA	NA	NA	NA	NA	NA	NA	NA	NA	NA
NCAPD2	DKC1	NA	NA	NUDT21	NA	NA	NA	NA	NA	NA	NA	NA	NA	NA
NCAPD3	DLEU1	NA	NA	NUF2	NA	NA	NA	NA	NA	NA	NA	NA	NA	NA
NCAPG2	DLG3	NA	NA	NUP107	NA	NA	NA	NA	NA	NA	NA	NA	NA	NA
NCAPH	DLGAP5	NA	NA	NUP133	NA	NA	NA	NA	NA	NA	NA	NA	NA	NA
NCOA5	DMC1	NA	NA	NUP205	NA	NA	NA	NA	NA	NA	NA	NA	NA	NA
NDC80	DNA2	NA	NA	NUP214	NA	NA	NA	NA	NA	NA	NA	NA	NA	NA
NDE1	DNAJA4	NA	NA	NUP35	NA	NA	NA	NA	NA	NA	NA	NA	NA	NA
NDP	DNAJC14	NA	NA	NUP85	NA	NA	NA	NA	NA	NA	NA	NA	NA	NA
NEFH	DNAJC2	NA	NA	NUP88	NA	NA	NA	NA	NA	NA	NA	NA	NA	NA
NEIL3	DNAJC22	NA	NA	NUP93	NA	NA	NA	NA	NA	NA	NA	NA	NA	NA
NEK2	DNAJC9	NA	NA	NUSAP1	NA	NA	NA	NA	NA	NA	NA	NA	NA	NA
NETO2	DNALI1	NA	NA	NXT2	NA	NA	NA	NA	NA	NA	NA	NA	NA	NA
NFIA	DNMT1	NA	NA	OAS3	NA	NA	NA	NA	NA	NA	NA	NA	NA	NA
NFIB	DNMT3A	NA	NA	ODC1	NA	NA	NA	NA	NA	NA	NA	NA	NA	NA
NFYA	DNMT3B	NA	NA	OIP5	NA	NA	NA	NA	NA	NA	NA	NA	NA	NA
NHEJ1	DNTTIP2	NA	NA	OLFML2B	NA	NA	NA	NA	NA	NA	NA	NA	NA	NA
NHP2	DOCK10	NA	NA	ORC1	NA	NA	NA	NA	NA	NA	NA	NA	NA	NA
NIF3L1	DOCK11	NA	NA	OSGEPL1	NA	NA	NA	NA	NA	NA	NA	NA	NA	NA
NNAT	DOK5	NA	NA	OXNAD1	NA	NA	NA	NA	NA	NA	NA	NA	NA	NA
NOC4L	DOK6	NA	NA	PA2G4	NA	NA	NA	NA	NA	NA	NA	NA	NA	NA
NOD1	DOLPP1	NA	NA	PAFAH1B3	NA	NA	NA	NA	NA	NA	NA	NA	NA	NA
NOL12	DONSON	NA	NA	PAICS	NA	NA	NA	NA	NA	NA	NA	NA	NA	NA
NOL9	DOT1L	NA	NA	PAK3	NA	NA	NA	NA	NA	NA	NA	NA	NA	NA
NOLC1	DPF1	NA	NA	PARP1	NA	NA	NA	NA	NA	NA	NA	NA	NA	NA
NONO	DPF3	NA	NA	PASK	NA	NA	NA	NA	NA	NA	NA	NA	NA	NA
NOV	DPH5	NA	NA	PATZ1	NA	NA	NA	NA	NA	NA	NA	NA	NA	NA
NOVA1	DPYD	NA	NA	PAXIP1	NA	NA	NA	NA	NA	NA	NA	NA	NA	NA
NPRL3	DPYSL3	NA	NA	PBK	NA	NA	NA	NA	NA	NA	NA	NA	NA	NA
NQO1	DROSHA	NA	NA	PCIF1	NA	NA	NA	NA	NA	NA	NA	NA	NA	NA
NQO2	DSC3	NA	NA	PCNT	NA	NA	NA	NA	NA	NA	NA	NA	NA	NA
NR2C2AP	DSCC1	NA	NA	PDE3B	NA	NA	NA	NA	NA	NA	NA	NA	NA	NA
NR2F1	DSEL	NA	NA	PDGFRA	NA	NA	NA	NA	NA	NA	NA	NA	NA	NA
NRM	DSG2	NA	NA	PEG10	NA	NA	NA	NA	NA	NA	NA	NA	NA	NA
NRP1	DSN1	NA	NA	PELI2	NA	NA	NA	NA	NA	NA	NA	NA	NA	NA
NSL1	DSTYK	NA	NA	PFAS	NA	NA	NA	NA	NA	NA	NA	NA	NA	NA
NSMCE4A	DTL	NA	NA	PGD	NA	NA	NA	NA	NA	NA	NA	NA	NA	NA
NTNG1	DTYMK	NA	NA	PHB2	NA	NA	NA	NA	NA	NA	NA	NA	NA	NA
NUDT21	DUS1L	NA	NA	PHC1	NA	NA	NA	NA	NA	NA	NA	NA	NA	NA
NUF2	DUS3L	NA	NA	PHF14	NA	NA	NA	NA	NA	NA	NA	NA	NA	NA
NUP107	DUS4L	NA	NA	PHF19	NA	NA	NA	NA	NA	NA	NA	NA	NA	NA
NUP133	DUSP12	NA	NA	PHF2	NA	NA	NA	NA	NA	NA	NA	NA	NA	NA
NUP205	DUSP18	NA	NA	PHF3	NA	NA	NA	NA	NA	NA	NA	NA	NA	NA
NUP214	DUT	NA	NA	PHF5A	NA	NA	NA	NA	NA	NA	NA	NA	NA	NA
NUP35	DVL2	NA	NA	PHF7	NA	NA	NA	NA	NA	NA	NA	NA	NA	NA
NUP85	DYNC2H1	NA	NA	PHIP	NA	NA	NA	NA	NA	NA	NA	NA	NA	NA
NUP88	DYRK1A	NA	NA	PIGX	NA	NA	NA	NA	NA	NA	NA	NA	NA	NA
NUP93	DZIP3	NA	NA	PINX1	NA	NA	NA	NA	NA	NA	NA	NA	NA	NA
NUSAP1	E2F1	NA	NA	PKDCC	NA	NA	NA	NA	NA	NA	NA	NA	NA	NA
NXT2	E2F3	NA	NA	PKMYT1	NA	NA	NA	NA	NA	NA	NA	NA	NA	NA
OAS3	E2F4	NA	NA	PKN3	NA	NA	NA	NA	NA	NA	NA	NA	NA	NA
ODC1	E2F5	NA	NA	PLCB1	NA	NA	NA	NA	NA	NA	NA	NA	NA	NA
OIP5	E2F6	NA	NA	PLEKHG4B	NA	NA	NA	NA	NA	NA	NA	NA	NA	NA
OLFML2B	E2F8	NA	NA	PLK1	NA	NA	NA	NA	NA	NA	NA	NA	NA	NA
ORC1	EARS2	NA	NA	PLK4	NA	NA	NA	NA	NA	NA	NA	NA	NA	NA
OSGEPL1	EBAG9	NA	NA	PLSCR1	NA	NA	NA	NA	NA	NA	NA	NA	NA	NA
OXNAD1	EBNA1BP2	NA	NA	POC1A	NA	NA	NA	NA	NA	NA	NA	NA	NA	NA
PA2G4	EBP	NA	NA	POGZ	NA	NA	NA	NA	NA	NA	NA	NA	NA	NA
PAFAH1B3	ECD	NA	NA	POLA1	NA	NA	NA	NA	NA	NA	NA	NA	NA	NA
PAICS	ECHDC3	NA	NA	POLA2	NA	NA	NA	NA	NA	NA	NA	NA	NA	NA
PAK3	ECSIT	NA	NA	POLD1	NA	NA	NA	NA	NA	NA	NA	NA	NA	NA
PARP1	ECT2	NA	NA	POLD2	NA	NA	NA	NA	NA	NA	NA	NA	NA	NA
PASK	EDC3	NA	NA	POLD3	NA	NA	NA	NA	NA	NA	NA	NA	NA	NA
PATZ1	EEF1A1	NA	NA	POLE	NA	NA	NA	NA	NA	NA	NA	NA	NA	NA
PAXIP1	EEF1D	NA	NA	POLE2	NA	NA	NA	NA	NA	NA	NA	NA	NA	NA
PBK	EEFSEC	NA	NA	POLR1A	NA	NA	NA	NA	NA	NA	NA	NA	NA	NA
PCDH10	EEPD1	NA	NA	POLR1B	NA	NA	NA	NA	NA	NA	NA	NA	NA	NA
PCIF1	EFCAB2	NA	NA	POP7	NA	NA	NA	NA	NA	NA	NA	NA	NA	NA
PCNT	EFCAB7	NA	NA	PPIH	NA	NA	NA	NA	NA	NA	NA	NA	NA	NA
PDE3B	EFHD2	NA	NA	PPIL1	NA	NA	NA	NA	NA	NA	NA	NA	NA	NA
PDGFRA	EFNA4	NA	NA	PPP2R5D	NA	NA	NA	NA	NA	NA	NA	NA	NA	NA
PDK3	EFS	NA	NA	PRC1	NA	NA	NA	NA	NA	NA	NA	NA	NA	NA
PEG10	EFTUD2	NA	NA	PRDM6	NA	NA	NA	NA	NA	NA	NA	NA	NA	NA
PELI2	EGR1	NA	NA	PRIM1	NA	NA	NA	NA	NA	NA	NA	NA	NA	NA
PFAS	EGR3	NA	NA	PRKAR2B	NA	NA	NA	NA	NA	NA	NA	NA	NA	NA
PFDN4	EHMT1	NA	NA	PRKDC	NA	NA	NA	NA	NA	NA	NA	NA	NA	NA
PGAM5	EHMT2	NA	NA	PRMT1	NA	NA	NA	NA	NA	NA	NA	NA	NA	NA
PGD	EIF1AD	NA	NA	PRMT3	NA	NA	NA	NA	NA	NA	NA	NA	NA	NA
PHB2	EIF2A	NA	NA	PRPF19	NA	NA	NA	NA	NA	NA	NA	NA	NA	NA
PHC1	EIF2B1	NA	NA	PRPF4	NA	NA	NA	NA	NA	NA	NA	NA	NA	NA
PHF14	EIF2B2	NA	NA	PRPF8	NA	NA	NA	NA	NA	NA	NA	NA	NA	NA
PHF19	EIF2B5	NA	NA	PRPS2	NA	NA	NA	NA	NA	NA	NA	NA	NA	NA
PHF2	EIF3D	NA	NA	PRR3	NA	NA	NA	NA	NA	NA	NA	NA	NA	NA
PHF3	EIF3E	NA	NA	PRTFDC1	NA	NA	NA	NA	NA	NA	NA	NA	NA	NA
PHF5A	EIF3L	NA	NA	PSD3	NA	NA	NA	NA	NA	NA	NA	NA	NA	NA
PHF7	EIF4B	NA	NA	PSIP1	NA	NA	NA	NA	NA	NA	NA	NA	NA	NA
PHIP	EIF4EBP1	NA	NA	PSRC1	NA	NA	NA	NA	NA	NA	NA	NA	NA	NA
PID1	EIF5	NA	NA	PTBP1	NA	NA	NA	NA	NA	NA	NA	NA	NA	NA
PIGX	ELAVL1	NA	NA	PTBP2	NA	NA	NA	NA	NA	NA	NA	NA	NA	NA
PINX1	ELF2	NA	NA	PTCH2	NA	NA	NA	NA	NA	NA	NA	NA	NA	NA
PITX2	ELF4	NA	NA	PTGER2	NA	NA	NA	NA	NA	NA	NA	NA	NA	NA
PIWIL2	ELOVL2	NA	NA	PTMA	NA	NA	NA	NA	NA	NA	NA	NA	NA	NA
PKDCC	ELOVL5	NA	NA	PTN	NA	NA	NA	NA	NA	NA	NA	NA	NA	NA
PKMYT1	ELP3	NA	NA	PTPN18	NA	NA	NA	NA	NA	NA	NA	NA	NA	NA
PKN3	ELP4	NA	NA	PTPRN	NA	NA	NA	NA	NA	NA	NA	NA	NA	NA
PKNOX2	EMD	NA	NA	PXMP4	NA	NA	NA	NA	NA	NA	NA	NA	NA	NA
PLCB1	EME1	NA	NA	PYGO1	NA	NA	NA	NA	NA	NA	NA	NA	NA	NA
PLEKHG4B	EMG1	NA	NA	PYGO2	NA	NA	NA	NA	NA	NA	NA	NA	NA	NA
PLK1	EML1	NA	NA	QRSL1	NA	NA	NA	NA	NA	NA	NA	NA	NA	NA
PLK4	EML4	NA	NA	QSER1	NA	NA	NA	NA	NA	NA	NA	NA	NA	NA
PLSCR1	EML5	NA	NA	R3HDM1	NA	NA	NA	NA	NA	NA	NA	NA	NA	NA
POC1A	EMP2	NA	NA	RACGAP1	NA	NA	NA	NA	NA	NA	NA	NA	NA	NA
POGZ	ENOPH1	NA	NA	RAD51	NA	NA	NA	NA	NA	NA	NA	NA	NA	NA
POLA1	ENOSF1	NA	NA	RAD51AP1	NA	NA	NA	NA	NA	NA	NA	NA	NA	NA
POLA2	ENOX2	NA	NA	RAD51C	NA	NA	NA	NA	NA	NA	NA	NA	NA	NA
POLD1	ENPP1	NA	NA	RAD54L	NA	NA	NA	NA	NA	NA	NA	NA	NA	NA
POLD2	ENPP2	NA	NA	RAE1	NA	NA	NA	NA	NA	NA	NA	NA	NA	NA
POLD3	ENSA	NA	NA	RALGPS2	NA	NA	NA	NA	NA	NA	NA	NA	NA	NA
POLE	ENTPD6	NA	NA	RANBP1	NA	NA	NA	NA	NA	NA	NA	NA	NA	NA
POLE2	ENY2	NA	NA	RBBP4	NA	NA	NA	NA	NA	NA	NA	NA	NA	NA
POLR1A	EP300	NA	NA	RBBP7	NA	NA	NA	NA	NA	NA	NA	NA	NA	NA
POLR1B	EP400	NA	NA	RBBP8	NA	NA	NA	NA	NA	NA	NA	NA	NA	NA
POP7	EPB41	NA	NA	RBM14	NA	NA	NA	NA	NA	NA	NA	NA	NA	NA
PPIH	EPHB4	NA	NA	RBM23	NA	NA	NA	NA	NA	NA	NA	NA	NA	NA
PPIL1	EPS8	NA	NA	RBM26	NA	NA	NA	NA	NA	NA	NA	NA	NA	NA
PPP2R5D	ERAL1	NA	NA	RCL1	NA	NA	NA	NA	NA	NA	NA	NA	NA	NA
PRC1	ERAP1	NA	NA	RECQL4	NA	NA	NA	NA	NA	NA	NA	NA	NA	NA
PRDM6	ERCC3	NA	NA	REEP4	NA	NA	NA	NA	NA	NA	NA	NA	NA	NA
PRIM1	ERCC4	NA	NA	RELN	NA	NA	NA	NA	NA	NA	NA	NA	NA	NA
PRKAR2B	ERCC6L	NA	NA	RFC2	NA	NA	NA	NA	NA	NA	NA	NA	NA	NA
PRKDC	ERCC8	NA	NA	RFC3	NA	NA	NA	NA	NA	NA	NA	NA	NA	NA
PRMT1	ERH	NA	NA	RFC4	NA	NA	NA	NA	NA	NA	NA	NA	NA	NA
PRMT3	ERI1	NA	NA	RFC5	NA	NA	NA	NA	NA	NA	NA	NA	NA	NA
PRPF19	ERI2	NA	NA	RFT1	NA	NA	NA	NA	NA	NA	NA	NA	NA	NA
PRPF4	ERI3	NA	NA	RFWD3	NA	NA	NA	NA	NA	NA	NA	NA	NA	NA
PRPF8	ERLIN1	NA	NA	RGS17	NA	NA	NA	NA	NA	NA	NA	NA	NA	NA
PRPS2	ESCO2	NA	NA	RIBC2	NA	NA	NA	NA	NA	NA	NA	NA	NA	NA
PRR3	ESF1	NA	NA	RIN1	NA	NA	NA	NA	NA	NA	NA	NA	NA	NA
PRTFDC1	ESPL1	NA	NA	RMI1	NA	NA	NA	NA	NA	NA	NA	NA	NA	NA
PRUNE2	ETAA1	NA	NA	RNASEH2A	NA	NA	NA	NA	NA	NA	NA	NA	NA	NA
PSD3	ETS2	NA	NA	RNASEH2B	NA	NA	NA	NA	NA	NA	NA	NA	NA	NA
PSIP1	EVI2B	NA	NA	RNF214	NA	NA	NA	NA	NA	NA	NA	NA	NA	NA
PSRC1	EWSR1	NA	NA	RNF26	NA	NA	NA	NA	NA	NA	NA	NA	NA	NA
PTBP1	EXO1	NA	NA	RNFT2	NA	NA	NA	NA	NA	NA	NA	NA	NA	NA
PTBP2	EXOG	NA	NA	ROR2	NA	NA	NA	NA	NA	NA	NA	NA	NA	NA
PTCH2	EXOSC10	NA	NA	RPA2	NA	NA	NA	NA	NA	NA	NA	NA	NA	NA
PTGER2	EXOSC2	NA	NA	RPA3	NA	NA	NA	NA	NA	NA	NA	NA	NA	NA
PTGFRN	EXOSC3	NA	NA	RPL39L	NA	NA	NA	NA	NA	NA	NA	NA	NA	NA
PTMA	EXOSC5	NA	NA	RPP25	NA	NA	NA	NA	NA	NA	NA	NA	NA	NA
PTN	EXOSC8	NA	NA	RPP30	NA	NA	NA	NA	NA	NA	NA	NA	NA	NA
PTPN18	EXOSC9	NA	NA	RPS6KA5	NA	NA	NA	NA	NA	NA	NA	NA	NA	NA
PTPN3	EYA2	NA	NA	RPUSD4	NA	NA	NA	NA	NA	NA	NA	NA	NA	NA
PTPRN	EYA3	NA	NA	RRM1	NA	NA	NA	NA	NA	NA	NA	NA	NA	NA
PXMP4	EYA4	NA	NA	RRP1B	NA	NA	NA	NA	NA	NA	NA	NA	NA	NA
PYGO1	EZH2	NA	NA	RRP7A	NA	NA	NA	NA	NA	NA	NA	NA	NA	NA
PYGO2	FAF1	NA	NA	RTKN2	NA	NA	NA	NA	NA	NA	NA	NA	NA	NA
QRSL1	FAIM	NA	NA	RTN4IP1	NA	NA	NA	NA	NA	NA	NA	NA	NA	NA
QSER1	FAIM2	NA	NA	RTTN	NA	NA	NA	NA	NA	NA	NA	NA	NA	NA
R3HDM1	FAM102B	NA	NA	RUVBL1	NA	NA	NA	NA	NA	NA	NA	NA	NA	NA
RAB42	FAM104B	NA	NA	SAFB	NA	NA	NA	NA	NA	NA	NA	NA	NA	NA
RACGAP1	FAM110A	NA	NA	SARS2	NA	NA	NA	NA	NA	NA	NA	NA	NA	NA
RAD51	FAM110B	NA	NA	SART3	NA	NA	NA	NA	NA	NA	NA	NA	NA	NA
RAD51AP1	FAM111A	NA	NA	SCARA3	NA	NA	NA	NA	NA	NA	NA	NA	NA	NA
RAD51C	FAM111B	NA	NA	SEMA4C	NA	NA	NA	NA	NA	NA	NA	NA	NA	NA
RAD54L	FAM120C	NA	NA	SENP1	NA	NA	NA	NA	NA	NA	NA	NA	NA	NA
RAE1	FAM122B	NA	NA	SEPHS1	NA	NA	NA	NA	NA	NA	NA	NA	NA	NA
RALGPS2	FAM129A	NA	NA	SETD1A	NA	NA	NA	NA	NA	NA	NA	NA	NA	NA
RANBP1	FAM13A	NA	NA	SETMAR	NA	NA	NA	NA	NA	NA	NA	NA	NA	NA
RARB	FAM161A	NA	NA	SF1	NA	NA	NA	NA	NA	NA	NA	NA	NA	NA
RAVER2	FAM162B	NA	NA	SF3A1	NA	NA	NA	NA	NA	NA	NA	NA	NA	NA
RBBP4	FAM173B	NA	NA	SF3A2	NA	NA	NA	NA	NA	NA	NA	NA	NA	NA
RBBP7	FAM180A	NA	NA	SF3A3	NA	NA	NA	NA	NA	NA	NA	NA	NA	NA
RBBP8	FAM192A	NA	NA	SF3B3	NA	NA	NA	NA	NA	NA	NA	NA	NA	NA
RBM14	FAM49A	NA	NA	SFMBT2	NA	NA	NA	NA	NA	NA	NA	NA	NA	NA
RBM23	FAM53B	NA	NA	SFPQ	NA	NA	NA	NA	NA	NA	NA	NA	NA	NA
RBM26	FAM76A	NA	NA	SFSWAP	NA	NA	NA	NA	NA	NA	NA	NA	NA	NA
RCL1	FAM76B	NA	NA	SFXN2	NA	NA	NA	NA	NA	NA	NA	NA	NA	NA
REC8	FAM83B	NA	NA	SHCBP1	NA	NA	NA	NA	NA	NA	NA	NA	NA	NA
RECQL4	FAM83D	NA	NA	SHMT1	NA	NA	NA	NA	NA	NA	NA	NA	NA	NA
REEP4	FAM98B	NA	NA	SIN3A	NA	NA	NA	NA	NA	NA	NA	NA	NA	NA
RELN	FAN1	NA	NA	SIPA1L2	NA	NA	NA	NA	NA	NA	NA	NA	NA	NA
RFC2	FANCA	NA	NA	SIVA1	NA	NA	NA	NA	NA	NA	NA	NA	NA	NA
RFC3	FANCB	NA	NA	SKA2	NA	NA	NA	NA	NA	NA	NA	NA	NA	NA
RFC4	FANCC	NA	NA	SKA3	NA	NA	NA	NA	NA	NA	NA	NA	NA	NA
RFC5	FANCD2	NA	NA	SLC12A7	NA	NA	NA	NA	NA	NA	NA	NA	NA	NA
RFT1	FANCE	NA	NA	SLC19A1	NA	NA	NA	NA	NA	NA	NA	NA	NA	NA
RFWD3	FANCF	NA	NA	SLC25A10	NA	NA	NA	NA	NA	NA	NA	NA	NA	NA
RGS17	FANCG	NA	NA	SLC25A13	NA	NA	NA	NA	NA	NA	NA	NA	NA	NA
RIBC2	FANCI	NA	NA	SLC25A40	NA	NA	NA	NA	NA	NA	NA	NA	NA	NA
RIMKLB	FANCL	NA	NA	SLC25A5	NA	NA	NA	NA	NA	NA	NA	NA	NA	NA
RIN1	FARS2	NA	NA	SLC29A1	NA	NA	NA	NA	NA	NA	NA	NA	NA	NA
RMI1	FASN	NA	NA	SLC37A4	NA	NA	NA	NA	NA	NA	NA	NA	NA	NA
RNASE2	FASTKD1	NA	NA	SLC4A8	NA	NA	NA	NA	NA	NA	NA	NA	NA	NA
RNASEH2A	FASTKD2	NA	NA	SLC5A6	NA	NA	NA	NA	NA	NA	NA	NA	NA	NA
RNASEH2B	FASTKD3	NA	NA	SLC7A11	NA	NA	NA	NA	NA	NA	NA	NA	NA	NA
RNF214	FAT3	NA	NA	SLC9A9	NA	NA	NA	NA	NA	NA	NA	NA	NA	NA
RNF26	FBL	NA	NA	SLFN11	NA	NA	NA	NA	NA	NA	NA	NA	NA	NA
RNFT2	FBLN1	NA	NA	SLFN13	NA	NA	NA	NA	NA	NA	NA	NA	NA	NA
ROR2	FBXO4	NA	NA	SMAD1	NA	NA	NA	NA	NA	NA	NA	NA	NA	NA
RPA2	FBXO43	NA	NA	SMAD6	NA	NA	NA	NA	NA	NA	NA	NA	NA	NA
RPA3	FBXO5	NA	NA	SMAP2	NA	NA	NA	NA	NA	NA	NA	NA	NA	NA
RPL39L	FCF1	NA	NA	SMARCA4	NA	NA	NA	NA	NA	NA	NA	NA	NA	NA
RPP25	FDXACB1	NA	NA	SMARCC1	NA	NA	NA	NA	NA	NA	NA	NA	NA	NA
RPP30	FEN1	NA	NA	SMARCD1	NA	NA	NA	NA	NA	NA	NA	NA	NA	NA
RPS6KA5	FERMT1	NA	NA	SMC1A	NA	NA	NA	NA	NA	NA	NA	NA	NA	NA
RPUSD4	FES	NA	NA	SMC2	NA	NA	NA	NA	NA	NA	NA	NA	NA	NA
RRM1	FGD1	NA	NA	SMC4	NA	NA	NA	NA	NA	NA	NA	NA	NA	NA
RRP1B	FGF7	NA	NA	SMPD4	NA	NA	NA	NA	NA	NA	NA	NA	NA	NA
RRP7A	FGFR1OP	NA	NA	SMYD5	NA	NA	NA	NA	NA	NA	NA	NA	NA	NA
RTKN2	FH	NA	NA	SNAI1	NA	NA	NA	NA	NA	NA	NA	NA	NA	NA
RTN4IP1	FHL3	NA	NA	SNORA74A	NA	NA	NA	NA	NA	NA	NA	NA	NA	NA
RTTN	FHOD1	NA	NA	SNRNP200	NA	NA	NA	NA	NA	NA	NA	NA	NA	NA
RUVBL1	FIGN	NA	NA	SNRNP40	NA	NA	NA	NA	NA	NA	NA	NA	NA	NA
SAFB	FIGNL1	NA	NA	SNRPA	NA	NA	NA	NA	NA	NA	NA	NA	NA	NA
SAP30	FIP1L1	NA	NA	SNRPC	NA	NA	NA	NA	NA	NA	NA	NA	NA	NA
SARS2	FJX1	NA	NA	SNRPD1	NA	NA	NA	NA	NA	NA	NA	NA	NA	NA
SART3	FKBP4	NA	NA	SNRPF	NA	NA	NA	NA	NA	NA	NA	NA	NA	NA
SCARA3	FLOT1	NA	NA	SORD	NA	NA	NA	NA	NA	NA	NA	NA	NA	NA
SEMA4C	FLVCR1	NA	NA	SORL1	NA	NA	NA	NA	NA	NA	NA	NA	NA	NA
SENP1	FMR1	NA	NA	SOX11	NA	NA	NA	NA	NA	NA	NA	NA	NA	NA
SEPHS1	FN3KRP	NA	NA	SP2	NA	NA	NA	NA	NA	NA	NA	NA	NA	NA
SESN3	FNDC3A	NA	NA	SP4	NA	NA	NA	NA	NA	NA	NA	NA	NA	NA
SETD1A	FOSL1	NA	NA	SPA17	NA	NA	NA	NA	NA	NA	NA	NA	NA	NA
SETMAR	FOXF1	NA	NA	SPAG5	NA	NA	NA	NA	NA	NA	NA	NA	NA	NA
SF1	FOXM1	NA	NA	SPATA5	NA	NA	NA	NA	NA	NA	NA	NA	NA	NA
SF3A1	FOXP2	NA	NA	SPATA6	NA	NA	NA	NA	NA	NA	NA	NA	NA	NA
SF3A2	FOXRED1	NA	NA	SPC24	NA	NA	NA	NA	NA	NA	NA	NA	NA	NA
SF3A3	FOXRED2	NA	NA	SPC25	NA	NA	NA	NA	NA	NA	NA	NA	NA	NA
SF3B3	FRRS1	NA	NA	SPEN	NA	NA	NA	NA	NA	NA	NA	NA	NA	NA
SFMBT2	FRYL	NA	NA	SPIN4	NA	NA	NA	NA	NA	NA	NA	NA	NA	NA
SFPQ	FRZB	NA	NA	SPTLC3	NA	NA	NA	NA	NA	NA	NA	NA	NA	NA
SFSWAP	FSD1	NA	NA	SRBD1	NA	NA	NA	NA	NA	NA	NA	NA	NA	NA
SFXN2	FST	NA	NA	SRGAP1	NA	NA	NA	NA	NA	NA	NA	NA	NA	NA
SHCBP1	FTSJ3	NA	NA	SRRT	NA	NA	NA	NA	NA	NA	NA	NA	NA	NA
SHMT1	FUBP1	NA	NA	SRSF1	NA	NA	NA	NA	NA	NA	NA	NA	NA	NA
SIN3A	FUS	NA	NA	SRSF2	NA	NA	NA	NA	NA	NA	NA	NA	NA	NA
SIPA1L2	FUT8	NA	NA	SRSF7	NA	NA	NA	NA	NA	NA	NA	NA	NA	NA
SIVA1	FUZ	NA	NA	SSBP4	NA	NA	NA	NA	NA	NA	NA	NA	NA	NA
SKA2	FZD7	NA	NA	SSRP1	NA	NA	NA	NA	NA	NA	NA	NA	NA	NA
SKA3	G2E3	NA	NA	ST6GALNAC3	NA	NA	NA	NA	NA	NA	NA	NA	NA	NA
SLC12A7	G3BP1	NA	NA	STEAP2	NA	NA	NA	NA	NA	NA	NA	NA	NA	NA
SLC19A1	G6PD	NA	NA	STIL	NA	NA	NA	NA	NA	NA	NA	NA	NA	NA
SLC25A10	GABPA	NA	NA	STK33	NA	NA	NA	NA	NA	NA	NA	NA	NA	NA
SLC25A13	GABPB1	NA	NA	STOML2	NA	NA	NA	NA	NA	NA	NA	NA	NA	NA
SLC25A40	GABRA5	NA	NA	SUV39H1	NA	NA	NA	NA	NA	NA	NA	NA	NA	NA
SLC25A5	GABRB1	NA	NA	SUV39H2	NA	NA	NA	NA	NA	NA	NA	NA	NA	NA
SLC29A1	GABRE	NA	NA	SYNE2	NA	NA	NA	NA	NA	NA	NA	NA	NA	NA
SLC37A4	GAL3ST4	NA	NA	SYTL2	NA	NA	NA	NA	NA	NA	NA	NA	NA	NA
SLC4A8	GALK2	NA	NA	TACC3	NA	NA	NA	NA	NA	NA	NA	NA	NA	NA
SLC5A6	GALM	NA	NA	TADA1	NA	NA	NA	NA	NA	NA	NA	NA	NA	NA
SLC7A11	GALNT12	NA	NA	TADA2A	NA	NA	NA	NA	NA	NA	NA	NA	NA	NA
SLC9A9	GART	NA	NA	TAF1A	NA	NA	NA	NA	NA	NA	NA	NA	NA	NA
SLCO2A1	GAS2L3	NA	NA	TAF9B	NA	NA	NA	NA	NA	NA	NA	NA	NA	NA
SLFN11	GATA2	NA	NA	TBL1XR1	NA	NA	NA	NA	NA	NA	NA	NA	NA	NA
SLFN13	GATAD2A	NA	NA	TBRG4	NA	NA	NA	NA	NA	NA	NA	NA	NA	NA
SMAD1	GBGT1	NA	NA	TBX4	NA	NA	NA	NA	NA	NA	NA	NA	NA	NA
SMAD6	GCNT1	NA	NA	TCERG1	NA	NA	NA	NA	NA	NA	NA	NA	NA	NA
SMAP2	GDAP1	NA	NA	TCF12	NA	NA	NA	NA	NA	NA	NA	NA	NA	NA
SMARCA4	GDF5	NA	NA	TCF19	NA	NA	NA	NA	NA	NA	NA	NA	NA	NA
SMARCC1	GEM	NA	NA	TCF7L2	NA	NA	NA	NA	NA	NA	NA	NA	NA	NA
SMARCD1	GEMIN4	NA	NA	TCOF1	NA	NA	NA	NA	NA	NA	NA	NA	NA	NA
SMC1A	GEMIN5	NA	NA	TDP1	NA	NA	NA	NA	NA	NA	NA	NA	NA	NA
SMC2	GEMIN6	NA	NA	TEAD2	NA	NA	NA	NA	NA	NA	NA	NA	NA	NA
SMC4	GEN1	NA	NA	TFAM	NA	NA	NA	NA	NA	NA	NA	NA	NA	NA
SMPD4	GFPT2	NA	NA	TFAP4	NA	NA	NA	NA	NA	NA	NA	NA	NA	NA
SMYD5	GGA2	NA	NA	THADA	NA	NA	NA	NA	NA	NA	NA	NA	NA	NA
SNAI1	GGH	NA	NA	THAP10	NA	NA	NA	NA	NA	NA	NA	NA	NA	NA
SNAP25	GIN1	NA	NA	THNSL1	NA	NA	NA	NA	NA	NA	NA	NA	NA	NA
SNORA70B	GINS1	NA	NA	THOC1	NA	NA	NA	NA	NA	NA	NA	NA	NA	NA
SNORA74A	GINS2	NA	NA	THOC6	NA	NA	NA	NA	NA	NA	NA	NA	NA	NA
SNRNP200	GINS3	NA	NA	TIMELESS	NA	NA	NA	NA	NA	NA	NA	NA	NA	NA
SNRNP40	GINS4	NA	NA	TIMM10	NA	NA	NA	NA	NA	NA	NA	NA	NA	NA
SNRPA	GJC1	NA	NA	TIPIN	NA	NA	NA	NA	NA	NA	NA	NA	NA	NA
SNRPC	GLB1L	NA	NA	TK1	NA	NA	NA	NA	NA	NA	NA	NA	NA	NA
SNRPD1	GLE1	NA	NA	TKT	NA	NA	NA	NA	NA	NA	NA	NA	NA	NA
SNRPF	GLI3	NA	NA	TLE1	NA	NA	NA	NA	NA	NA	NA	NA	NA	NA
SORD	GLMN	NA	NA	TLE3	NA	NA	NA	NA	NA	NA	NA	NA	NA	NA
SORL1	GLO1	NA	NA	TMED8	NA	NA	NA	NA	NA	NA	NA	NA	NA	NA
SOX11	GLOD4	NA	NA	TMEM106C	NA	NA	NA	NA	NA	NA	NA	NA	NA	NA
SP2	GLUL	NA	NA	TMEM155	NA	NA	NA	NA	NA	NA	NA	NA	NA	NA
SP4	GLYR1	NA	NA	TMEM18	NA	NA	NA	NA	NA	NA	NA	NA	NA	NA
SPA17	GMEB1	NA	NA	TMEM201	NA	NA	NA	NA	NA	NA	NA	NA	NA	NA
SPAG5	GMNN	NA	NA	TMEM209	NA	NA	NA	NA	NA	NA	NA	NA	NA	NA
SPATA5	GMPPB	NA	NA	TMEM39B	NA	NA	NA	NA	NA	NA	NA	NA	NA	NA
SPATA6	GMPS	NA	NA	TMEM97	NA	NA	NA	NA	NA	NA	NA	NA	NA	NA
SPC24	GNB3	NA	NA	TMPO	NA	NA	NA	NA	NA	NA	NA	NA	NA	NA
SPC25	GNE	NA	NA	TMTC4	NA	NA	NA	NA	NA	NA	NA	NA	NA	NA
SPEN	GNG2	NA	NA	TNRC6A	NA	NA	NA	NA	NA	NA	NA	NA	NA	NA
SPIN4	GNL3	NA	NA	TOE1	NA	NA	NA	NA	NA	NA	NA	NA	NA	NA
SPTLC3	GNL3L	NA	NA	TOMM22	NA	NA	NA	NA	NA	NA	NA	NA	NA	NA
SRBD1	GNPDA1	NA	NA	TOP1	NA	NA	NA	NA	NA	NA	NA	NA	NA	NA
SRGAP1	GNPNAT1	NA	NA	TOP3A	NA	NA	NA	NA	NA	NA	NA	NA	NA	NA
SRRT	GOLM1	NA	NA	TOX	NA	NA	NA	NA	NA	NA	NA	NA	NA	NA
SRSF1	GOT2	NA	NA	TRAIP	NA	NA	NA	NA	NA	NA	NA	NA	NA	NA
SRSF2	GPAM	NA	NA	TRAP1	NA	NA	NA	NA	NA	NA	NA	NA	NA	NA
SRSF7	GPATCH1	NA	NA	TRIM14	NA	NA	NA	NA	NA	NA	NA	NA	NA	NA
SSBP4	GPATCH4	NA	NA	TRIM28	NA	NA	NA	NA	NA	NA	NA	NA	NA	NA
SSRP1	GPBP1	NA	NA	TRIP13	NA	NA	NA	NA	NA	NA	NA	NA	NA	NA
ST6GALNAC3	GPC5	NA	NA	TRMT5	NA	NA	NA	NA	NA	NA	NA	NA	NA	NA
STAC	GPC6	NA	NA	TROAP	NA	NA	NA	NA	NA	NA	NA	NA	NA	NA
STEAP2	GPD2	NA	NA	TRPC5	NA	NA	NA	NA	NA	NA	NA	NA	NA	NA
STIL	GPHN	NA	NA	TSEN2	NA	NA	NA	NA	NA	NA	NA	NA	NA	NA
STK33	GPM6B	NA	NA	TSHZ1	NA	NA	NA	NA	NA	NA	NA	NA	NA	NA
STOML2	GPR137C	NA	NA	TSPYL5	NA	NA	NA	NA	NA	NA	NA	NA	NA	NA
SUV39H1	GPR39	NA	NA	TTC30B	NA	NA	NA	NA	NA	NA	NA	NA	NA	NA
SUV39H2	GPR85	NA	NA	TTF2	NA	NA	NA	NA	NA	NA	NA	NA	NA	NA
SYBU	GPR87	NA	NA	TTI1	NA	NA	NA	NA	NA	NA	NA	NA	NA	NA
SYNE2	GPSM2	NA	NA	TTLL12	NA	NA	NA	NA	NA	NA	NA	NA	NA	NA
SYTL2	GPX7	NA	NA	TTLL4	NA	NA	NA	NA	NA	NA	NA	NA	NA	NA
TACC3	GREM2	NA	NA	TUBD1	NA	NA	NA	NA	NA	NA	NA	NA	NA	NA
TADA1	GRK6	NA	NA	TUBGCP3	NA	NA	NA	NA	NA	NA	NA	NA	NA	NA
TADA2A	GRPEL2	NA	NA	TUBGCP4	NA	NA	NA	NA	NA	NA	NA	NA	NA	NA
TAF1A	GRPR	NA	NA	TXLNG	NA	NA	NA	NA	NA	NA	NA	NA	NA	NA
TAF9B	GRWD1	NA	NA	TXNDC16	NA	NA	NA	NA	NA	NA	NA	NA	NA	NA
TBL1XR1	GSR	NA	NA	TXNRD1	NA	NA	NA	NA	NA	NA	NA	NA	NA	NA
TBRG4	GSTCD	NA	NA	TYMS	NA	NA	NA	NA	NA	NA	NA	NA	NA	NA
TBX4	GSTM5	NA	NA	UBA2	NA	NA	NA	NA	NA	NA	NA	NA	NA	NA
TCERG1	GTF2E1	NA	NA	UBE2C	NA	NA	NA	NA	NA	NA	NA	NA	NA	NA
TCF12	GTF2E2	NA	NA	UBE2S	NA	NA	NA	NA	NA	NA	NA	NA	NA	NA
TCF19	GTF2F2	NA	NA	UBE2T	NA	NA	NA	NA	NA	NA	NA	NA	NA	NA
TCF7L2	GTF2H3	NA	NA	UBTF	NA	NA	NA	NA	NA	NA	NA	NA	NA	NA
TCOF1	GTF2H4	NA	NA	UCK1	NA	NA	NA	NA	NA	NA	NA	NA	NA	NA
TDP1	GTF2I	NA	NA	UHRF1	NA	NA	NA	NA	NA	NA	NA	NA	NA	NA
TEAD2	GTF2IRD1	NA	NA	ULBP3	NA	NA	NA	NA	NA	NA	NA	NA	NA	NA
TFAM	GTF3A	NA	NA	UMPS	NA	NA	NA	NA	NA	NA	NA	NA	NA	NA
TFAP4	GTF3C2	NA	NA	UNC5C	NA	NA	NA	NA	NA	NA	NA	NA	NA	NA
THADA	GTF3C3	NA	NA	UNG	NA	NA	NA	NA	NA	NA	NA	NA	NA	NA
THAP10	GTF3C4	NA	NA	UNK	NA	NA	NA	NA	NA	NA	NA	NA	NA	NA
THNSL1	GTF3C5	NA	NA	UPF1	NA	NA	NA	NA	NA	NA	NA	NA	NA	NA
THOC1	GTSE1	NA	NA	UPF3B	NA	NA	NA	NA	NA	NA	NA	NA	NA	NA
THOC6	GUF1	NA	NA	URB2	NA	NA	NA	NA	NA	NA	NA	NA	NA	NA
TIMELESS	GUSB	NA	NA	USP21	NA	NA	NA	NA	NA	NA	NA	NA	NA	NA
TIMM10	H1F0	NA	NA	USP28	NA	NA	NA	NA	NA	NA	NA	NA	NA	NA
TIPIN	H1FX	NA	NA	USP3	NA	NA	NA	NA	NA	NA	NA	NA	NA	NA
TK1	H2AFV	NA	NA	USP39	NA	NA	NA	NA	NA	NA	NA	NA	NA	NA
TKT	H2AFX	NA	NA	USP54	NA	NA	NA	NA	NA	NA	NA	NA	NA	NA
TLE1	H2AFY2	NA	NA	VAC14	NA	NA	NA	NA	NA	NA	NA	NA	NA	NA
TLE3	H2AFZ	NA	NA	VAT1L	NA	NA	NA	NA	NA	NA	NA	NA	NA	NA
TMED8	H3F3B	NA	NA	VPS52	NA	NA	NA	NA	NA	NA	NA	NA	NA	NA
TMEM106C	HADH	NA	NA	VSIG10	NA	NA	NA	NA	NA	NA	NA	NA	NA	NA
TMEM155	HAT1	NA	NA	VSNL1	NA	NA	NA	NA	NA	NA	NA	NA	NA	NA
TMEM18	HAUS1	NA	NA	WDHD1	NA	NA	NA	NA	NA	NA	NA	NA	NA	NA
TMEM201	HAUS2	NA	NA	WDR17	NA	NA	NA	NA	NA	NA	NA	NA	NA	NA
TMEM209	HAUS4	NA	NA	WDR34	NA	NA	NA	NA	NA	NA	NA	NA	NA	NA
TMEM39B	HAUS5	NA	NA	WDR35	NA	NA	NA	NA	NA	NA	NA	NA	NA	NA
TMEM97	HAUS6	NA	NA	WDR5	NA	NA	NA	NA	NA	NA	NA	NA	NA	NA
TMPO	HAUS8	NA	NA	WDR76	NA	NA	NA	NA	NA	NA	NA	NA	NA	NA
TMTC2	HAX1	NA	NA	WEE1	NA	NA	NA	NA	NA	NA	NA	NA	NA	NA
TMTC4	HCFC1	NA	NA	WNK3	NA	NA	NA	NA	NA	NA	NA	NA	NA	NA
TNRC6A	HCFC1R1	NA	NA	WRAP53	NA	NA	NA	NA	NA	NA	NA	NA	NA	NA
TOE1	HDAC1	NA	NA	WWC1	NA	NA	NA	NA	NA	NA	NA	NA	NA	NA
TOMM22	HDAC2	NA	NA	XKR5	NA	NA	NA	NA	NA	NA	NA	NA	NA	NA
TOP1	HDGF	NA	NA	XRCC1	NA	NA	NA	NA	NA	NA	NA	NA	NA	NA
TOP3A	HDHD3	NA	NA	XRCC2	NA	NA	NA	NA	NA	NA	NA	NA	NA	NA
TOX	HDX	NA	NA	XRCC3	NA	NA	NA	NA	NA	NA	NA	NA	NA	NA
TRAIP	HEATR1	NA	NA	YEATS4	NA	NA	NA	NA	NA	NA	NA	NA	NA	NA
TRAP1	HEATR3	NA	NA	ZBTB44	NA	NA	NA	NA	NA	NA	NA	NA	NA	NA
TRIM14	HEATR6	NA	NA	ZBTB9	NA	NA	NA	NA	NA	NA	NA	NA	NA	NA
TRIM28	HELB	NA	NA	ZC3H18	NA	NA	NA	NA	NA	NA	NA	NA	NA	NA
TRIP13	HELLS	NA	NA	ZC3H4	NA	NA	NA	NA	NA	NA	NA	NA	NA	NA
TRMT5	HEPH	NA	NA	ZCCHC14	NA	NA	NA	NA	NA	NA	NA	NA	NA	NA
TROAP	HGF	NA	NA	ZCCHC8	NA	NA	NA	NA	NA	NA	NA	NA	NA	NA
TRPC5	HHEX	NA	NA	ZFHX4	NA	NA	NA	NA	NA	NA	NA	NA	NA	NA
TSEN2	HIP1	NA	NA	ZFP3	NA	NA	NA	NA	NA	NA	NA	NA	NA	NA
TSHZ1	HIPK2	NA	NA	ZMAT4	NA	NA	NA	NA	NA	NA	NA	NA	NA	NA
TSPYL5	HIRA	NA	NA	ZMIZ1	NA	NA	NA	NA	NA	NA	NA	NA	NA	NA
TTC30B	HIRIP3	NA	NA	ZMYND8	NA	NA	NA	NA	NA	NA	NA	NA	NA	NA
TTF2	HIST1H1A	NA	NA	ZNF141	NA	NA	NA	NA	NA	NA	NA	NA	NA	NA
TTI1	HIST1H1B	NA	NA	ZNF142	NA	NA	NA	NA	NA	NA	NA	NA	NA	NA
TTLL12	HIST1H1C	NA	NA	ZNF22	NA	NA	NA	NA	NA	NA	NA	NA	NA	NA
TTLL4	HIST1H1D	NA	NA	ZNF254	NA	NA	NA	NA	NA	NA	NA	NA	NA	NA
TUBD1	HIST1H1E	NA	NA	ZNF273	NA	NA	NA	NA	NA	NA	NA	NA	NA	NA
TUBGCP3	HIST1H2AB	NA	NA	ZNF280B	NA	NA	NA	NA	NA	NA	NA	NA	NA	NA
TUBGCP4	HIST1H2AC	NA	NA	ZNF300	NA	NA	NA	NA	NA	NA	NA	NA	NA	NA
TXLNG	HIST1H2AE	NA	NA	ZNF326	NA	NA	NA	NA	NA	NA	NA	NA	NA	NA
TXNDC16	HIST1H2AH	NA	NA	ZNF334	NA	NA	NA	NA	NA	NA	NA	NA	NA	NA
TXNRD1	HIST1H2AI	NA	NA	ZNF367	NA	NA	NA	NA	NA	NA	NA	NA	NA	NA
TYMS	HIST1H2AJ	NA	NA	ZNF385D	NA	NA	NA	NA	NA	NA	NA	NA	NA	NA
U2AF1L4	HIST1H2AK	NA	NA	ZNF454	NA	NA	NA	NA	NA	NA	NA	NA	NA	NA
UBA2	HIST1H2AL	NA	NA	ZNF473	NA	NA	NA	NA	NA	NA	NA	NA	NA	NA
UBE2C	HIST1H2AM	NA	NA	ZNF503	NA	NA	NA	NA	NA	NA	NA	NA	NA	NA
UBE2O	HIST1H2BB	NA	NA	ZNF551	NA	NA	NA	NA	NA	NA	NA	NA	NA	NA
UBE2S	HIST1H2BC	NA	NA	ZNF714	NA	NA	NA	NA	NA	NA	NA	NA	NA	NA
UBE2T	HIST1H2BD	NA	NA	ZRANB3	NA	NA	NA	NA	NA	NA	NA	NA	NA	NA
UBTF	HIST1H2BE	NA	NA	ZSCAN16	NA	NA	NA	NA	NA	NA	NA	NA	NA	NA
UCK1	HIST1H2BF	NA	NA	ZSCAN2	NA	NA	NA	NA	NA	NA	NA	NA	NA	NA
UHRF1	HIST1H2BG	NA	NA	ZWINT	NA	NA	NA	NA	NA	NA	NA	NA	NA	NA
ULBP3	HIST1H2BH	NA	NA	ZYG11A	NA	NA	NA	NA	NA	NA	NA	NA	NA	NA
UMPS	HIST1H2BI	NA	NA	NA	NA	NA	NA	NA	NA	NA	NA	NA	NA	NA
UNC5C	HIST1H2BL	NA	NA	NA	NA	NA	NA	NA	NA	NA	NA	NA	NA	NA
UNG	HIST1H2BM	NA	NA	NA	NA	NA	NA	NA	NA	NA	NA	NA	NA	NA
UNK	HIST1H2BN	NA	NA	NA	NA	NA	NA	NA	NA	NA	NA	NA	NA	NA
UPF1	HIST1H2BO	NA	NA	NA	NA	NA	NA	NA	NA	NA	NA	NA	NA	NA
UPF3B	HIST1H3A	NA	NA	NA	NA	NA	NA	NA	NA	NA	NA	NA	NA	NA
URB2	HIST1H3B	NA	NA	NA	NA	NA	NA	NA	NA	NA	NA	NA	NA	NA
USP21	HIST1H3C	NA	NA	NA	NA	NA	NA	NA	NA	NA	NA	NA	NA	NA
USP28	HIST1H3E	NA	NA	NA	NA	NA	NA	NA	NA	NA	NA	NA	NA	NA
USP3	HIST1H3F	NA	NA	NA	NA	NA	NA	NA	NA	NA	NA	NA	NA	NA
USP39	HIST1H3G	NA	NA	NA	NA	NA	NA	NA	NA	NA	NA	NA	NA	NA
USP54	HIST1H3H	NA	NA	NA	NA	NA	NA	NA	NA	NA	NA	NA	NA	NA
VAC14	HIST1H3I	NA	NA	NA	NA	NA	NA	NA	NA	NA	NA	NA	NA	NA
VAT1L	HIST1H3J	NA	NA	NA	NA	NA	NA	NA	NA	NA	NA	NA	NA	NA
VPS52	HIST1H4A	NA	NA	NA	NA	NA	NA	NA	NA	NA	NA	NA	NA	NA
VSIG10	HIST1H4B	NA	NA	NA	NA	NA	NA	NA	NA	NA	NA	NA	NA	NA
VSNL1	HIST1H4C	NA	NA	NA	NA	NA	NA	NA	NA	NA	NA	NA	NA	NA
WDHD1	HIST1H4D	NA	NA	NA	NA	NA	NA	NA	NA	NA	NA	NA	NA	NA
WDR17	HIST1H4E	NA	NA	NA	NA	NA	NA	NA	NA	NA	NA	NA	NA	NA
WDR34	HIST1H4F	NA	NA	NA	NA	NA	NA	NA	NA	NA	NA	NA	NA	NA
WDR35	HIST1H4I	NA	NA	NA	NA	NA	NA	NA	NA	NA	NA	NA	NA	NA
WDR5	HIST1H4L	NA	NA	NA	NA	NA	NA	NA	NA	NA	NA	NA	NA	NA
WDR76	HIST2H2AB	NA	NA	NA	NA	NA	NA	NA	NA	NA	NA	NA	NA	NA
WEE1	HIST2H2AC	NA	NA	NA	NA	NA	NA	NA	NA	NA	NA	NA	NA	NA
WNK3	HIST3H2A	NA	NA	NA	NA	NA	NA	NA	NA	NA	NA	NA	NA	NA
WRAP53	HIST3H2BB	NA	NA	NA	NA	NA	NA	NA	NA	NA	NA	NA	NA	NA
WWC1	HJURP	NA	NA	NA	NA	NA	NA	NA	NA	NA	NA	NA	NA	NA
XKR5	HLX	NA	NA	NA	NA	NA	NA	NA	NA	NA	NA	NA	NA	NA
XRCC1	HMBS	NA	NA	NA	NA	NA	NA	NA	NA	NA	NA	NA	NA	NA
XRCC2	HMG20A	NA	NA	NA	NA	NA	NA	NA	NA	NA	NA	NA	NA	NA
XRCC3	HMG20B	NA	NA	NA	NA	NA	NA	NA	NA	NA	NA	NA	NA	NA
YEATS4	HMGA1	NA	NA	NA	NA	NA	NA	NA	NA	NA	NA	NA	NA	NA
ZBTB44	HMGB1	NA	NA	NA	NA	NA	NA	NA	NA	NA	NA	NA	NA	NA
ZBTB9	HMGB2	NA	NA	NA	NA	NA	NA	NA	NA	NA	NA	NA	NA	NA
ZC3H18	HMGB3	NA	NA	NA	NA	NA	NA	NA	NA	NA	NA	NA	NA	NA
ZC3H4	HMGN1	NA	NA	NA	NA	NA	NA	NA	NA	NA	NA	NA	NA	NA
ZCCHC14	HMGN2	NA	NA	NA	NA	NA	NA	NA	NA	NA	NA	NA	NA	NA
ZCCHC2	HMGN3	NA	NA	NA	NA	NA	NA	NA	NA	NA	NA	NA	NA	NA
ZCCHC8	HMGXB4	NA	NA	NA	NA	NA	NA	NA	NA	NA	NA	NA	NA	NA
ZDHHC13	HMMR	NA	NA	NA	NA	NA	NA	NA	NA	NA	NA	NA	NA	NA
ZFHX4	HMOX1	NA	NA	NA	NA	NA	NA	NA	NA	NA	NA	NA	NA	NA
ZFP3	HNRNPA0	NA	NA	NA	NA	NA	NA	NA	NA	NA	NA	NA	NA	NA
ZMAT4	HNRNPA1	NA	NA	NA	NA	NA	NA	NA	NA	NA	NA	NA	NA	NA
ZMIZ1	HNRNPA2B1	NA	NA	NA	NA	NA	NA	NA	NA	NA	NA	NA	NA	NA
ZMYND8	HNRNPAB	NA	NA	NA	NA	NA	NA	NA	NA	NA	NA	NA	NA	NA
ZNF141	HNRNPD	NA	NA	NA	NA	NA	NA	NA	NA	NA	NA	NA	NA	NA
ZNF142	HNRNPF	NA	NA	NA	NA	NA	NA	NA	NA	NA	NA	NA	NA	NA
ZNF22	HNRNPH1	NA	NA	NA	NA	NA	NA	NA	NA	NA	NA	NA	NA	NA
ZNF254	HNRNPH3	NA	NA	NA	NA	NA	NA	NA	NA	NA	NA	NA	NA	NA
ZNF273	HNRNPL	NA	NA	NA	NA	NA	NA	NA	NA	NA	NA	NA	NA	NA
ZNF280B	HNRNPM	NA	NA	NA	NA	NA	NA	NA	NA	NA	NA	NA	NA	NA
ZNF300	HNRNPR	NA	NA	NA	NA	NA	NA	NA	NA	NA	NA	NA	NA	NA
ZNF326	HNRNPU	NA	NA	NA	NA	NA	NA	NA	NA	NA	NA	NA	NA	NA
ZNF334	HNRNPUL1	NA	NA	NA	NA	NA	NA	NA	NA	NA	NA	NA	NA	NA
ZNF367	HOXA2	NA	NA	NA	NA	NA	NA	NA	NA	NA	NA	NA	NA	NA
ZNF385D	HOXA3	NA	NA	NA	NA	NA	NA	NA	NA	NA	NA	NA	NA	NA
ZNF454	HOXA4	NA	NA	NA	NA	NA	NA	NA	NA	NA	NA	NA	NA	NA
ZNF473	HOXA5	NA	NA	NA	NA	NA	NA	NA	NA	NA	NA	NA	NA	NA
ZNF503	HOXA6	NA	NA	NA	NA	NA	NA	NA	NA	NA	NA	NA	NA	NA
ZNF551	HOXA7	NA	NA	NA	NA	NA	NA	NA	NA	NA	NA	NA	NA	NA
ZNF589	HOXC5	NA	NA	NA	NA	NA	NA	NA	NA	NA	NA	NA	NA	NA
ZNF714	HPDL	NA	NA	NA	NA	NA	NA	NA	NA	NA	NA	NA	NA	NA
ZNF814	HPRT1	NA	NA	NA	NA	NA	NA	NA	NA	NA	NA	NA	NA	NA
ZRANB3	HPS4	NA	NA	NA	NA	NA	NA	NA	NA	NA	NA	NA	NA	NA
ZSCAN16	HS3ST3B1	NA	NA	NA	NA	NA	NA	NA	NA	NA	NA	NA	NA	NA
ZSCAN2	HS6ST1	NA	NA	NA	NA	NA	NA	NA	NA	NA	NA	NA	NA	NA
ZWINT	HSCB	NA	NA	NA	NA	NA	NA	NA	NA	NA	NA	NA	NA	NA
ZYG11A	HSF2	NA	NA	NA	NA	NA	NA	NA	NA	NA	NA	NA	NA	NA
NA	HSP90AB1	NA	NA	NA	NA	NA	NA	NA	NA	NA	NA	NA	NA	NA
NA	HSPA12A	NA	NA	NA	NA	NA	NA	NA	NA	NA	NA	NA	NA	NA
NA	HSPA14	NA	NA	NA	NA	NA	NA	NA	NA	NA	NA	NA	NA	NA
NA	HSPA2	NA	NA	NA	NA	NA	NA	NA	NA	NA	NA	NA	NA	NA
NA	HSPB11	NA	NA	NA	NA	NA	NA	NA	NA	NA	NA	NA	NA	NA
NA	HSPBAP1	NA	NA	NA	NA	NA	NA	NA	NA	NA	NA	NA	NA	NA
NA	HSPD1	NA	NA	NA	NA	NA	NA	NA	NA	NA	NA	NA	NA	NA
NA	HSPH1	NA	NA	NA	NA	NA	NA	NA	NA	NA	NA	NA	NA	NA
NA	HTATSF1	NA	NA	NA	NA	NA	NA	NA	NA	NA	NA	NA	NA	NA
NA	HTR2B	NA	NA	NA	NA	NA	NA	NA	NA	NA	NA	NA	NA	NA
NA	HUNK	NA	NA	NA	NA	NA	NA	NA	NA	NA	NA	NA	NA	NA
NA	HYLS1	NA	NA	NA	NA	NA	NA	NA	NA	NA	NA	NA	NA	NA
NA	HYOU1	NA	NA	NA	NA	NA	NA	NA	NA	NA	NA	NA	NA	NA
NA	ICA1L	NA	NA	NA	NA	NA	NA	NA	NA	NA	NA	NA	NA	NA
NA	ICK	NA	NA	NA	NA	NA	NA	NA	NA	NA	NA	NA	NA	NA
NA	ID1	NA	NA	NA	NA	NA	NA	NA	NA	NA	NA	NA	NA	NA
NA	ID2	NA	NA	NA	NA	NA	NA	NA	NA	NA	NA	NA	NA	NA
NA	ID4	NA	NA	NA	NA	NA	NA	NA	NA	NA	NA	NA	NA	NA
NA	IDH2	NA	NA	NA	NA	NA	NA	NA	NA	NA	NA	NA	NA	NA
NA	IDH3A	NA	NA	NA	NA	NA	NA	NA	NA	NA	NA	NA	NA	NA
NA	IER2	NA	NA	NA	NA	NA	NA	NA	NA	NA	NA	NA	NA	NA
NA	IFI16	NA	NA	NA	NA	NA	NA	NA	NA	NA	NA	NA	NA	NA
NA	IFRD2	NA	NA	NA	NA	NA	NA	NA	NA	NA	NA	NA	NA	NA
NA	IFT122	NA	NA	NA	NA	NA	NA	NA	NA	NA	NA	NA	NA	NA
NA	IFT46	NA	NA	NA	NA	NA	NA	NA	NA	NA	NA	NA	NA	NA
NA	IFT57	NA	NA	NA	NA	NA	NA	NA	NA	NA	NA	NA	NA	NA
NA	IFT74	NA	NA	NA	NA	NA	NA	NA	NA	NA	NA	NA	NA	NA
NA	IFT80	NA	NA	NA	NA	NA	NA	NA	NA	NA	NA	NA	NA	NA
NA	IFT81	NA	NA	NA	NA	NA	NA	NA	NA	NA	NA	NA	NA	NA
NA	IFT88	NA	NA	NA	NA	NA	NA	NA	NA	NA	NA	NA	NA	NA
NA	IGF2BP1	NA	NA	NA	NA	NA	NA	NA	NA	NA	NA	NA	NA	NA
NA	IGSF10	NA	NA	NA	NA	NA	NA	NA	NA	NA	NA	NA	NA	NA
NA	IKZF4	NA	NA	NA	NA	NA	NA	NA	NA	NA	NA	NA	NA	NA
NA	IL17RE	NA	NA	NA	NA	NA	NA	NA	NA	NA	NA	NA	NA	NA
NA	IL18R1	NA	NA	NA	NA	NA	NA	NA	NA	NA	NA	NA	NA	NA
NA	IL1R1	NA	NA	NA	NA	NA	NA	NA	NA	NA	NA	NA	NA	NA
NA	IL31RA	NA	NA	NA	NA	NA	NA	NA	NA	NA	NA	NA	NA	NA
NA	IL6R	NA	NA	NA	NA	NA	NA	NA	NA	NA	NA	NA	NA	NA
NA	ILF2	NA	NA	NA	NA	NA	NA	NA	NA	NA	NA	NA	NA	NA
NA	ILF3	NA	NA	NA	NA	NA	NA	NA	NA	NA	NA	NA	NA	NA
NA	ILKAP	NA	NA	NA	NA	NA	NA	NA	NA	NA	NA	NA	NA	NA
NA	IMMP1L	NA	NA	NA	NA	NA	NA	NA	NA	NA	NA	NA	NA	NA
NA	IMP4	NA	NA	NA	NA	NA	NA	NA	NA	NA	NA	NA	NA	NA
NA	IMPDH2	NA	NA	NA	NA	NA	NA	NA	NA	NA	NA	NA	NA	NA
NA	INCENP	NA	NA	NA	NA	NA	NA	NA	NA	NA	NA	NA	NA	NA
NA	ING3	NA	NA	NA	NA	NA	NA	NA	NA	NA	NA	NA	NA	NA
NA	INPP5B	NA	NA	NA	NA	NA	NA	NA	NA	NA	NA	NA	NA	NA
NA	INTS2	NA	NA	NA	NA	NA	NA	NA	NA	NA	NA	NA	NA	NA
NA	INTS4	NA	NA	NA	NA	NA	NA	NA	NA	NA	NA	NA	NA	NA
NA	INTS7	NA	NA	NA	NA	NA	NA	NA	NA	NA	NA	NA	NA	NA
NA	INTS8	NA	NA	NA	NA	NA	NA	NA	NA	NA	NA	NA	NA	NA
NA	INTS9	NA	NA	NA	NA	NA	NA	NA	NA	NA	NA	NA	NA	NA
NA	INVS	NA	NA	NA	NA	NA	NA	NA	NA	NA	NA	NA	NA	NA
NA	IPO4	NA	NA	NA	NA	NA	NA	NA	NA	NA	NA	NA	NA	NA
NA	IPO5	NA	NA	NA	NA	NA	NA	NA	NA	NA	NA	NA	NA	NA
NA	IPO9	NA	NA	NA	NA	NA	NA	NA	NA	NA	NA	NA	NA	NA
NA	IQCB1	NA	NA	NA	NA	NA	NA	NA	NA	NA	NA	NA	NA	NA
NA	IQCC	NA	NA	NA	NA	NA	NA	NA	NA	NA	NA	NA	NA	NA
NA	IQCG	NA	NA	NA	NA	NA	NA	NA	NA	NA	NA	NA	NA	NA
NA	IQGAP3	NA	NA	NA	NA	NA	NA	NA	NA	NA	NA	NA	NA	NA
NA	IRAK1BP1	NA	NA	NA	NA	NA	NA	NA	NA	NA	NA	NA	NA	NA
NA	IRAK3	NA	NA	NA	NA	NA	NA	NA	NA	NA	NA	NA	NA	NA
NA	IRF2	NA	NA	NA	NA	NA	NA	NA	NA	NA	NA	NA	NA	NA
NA	IRS1	NA	NA	NA	NA	NA	NA	NA	NA	NA	NA	NA	NA	NA
NA	ISLR	NA	NA	NA	NA	NA	NA	NA	NA	NA	NA	NA	NA	NA
NA	ISOC1	NA	NA	NA	NA	NA	NA	NA	NA	NA	NA	NA	NA	NA
NA	ITGB3BP	NA	NA	NA	NA	NA	NA	NA	NA	NA	NA	NA	NA	NA
NA	ITPA	NA	NA	NA	NA	NA	NA	NA	NA	NA	NA	NA	NA	NA
NA	ITPRIPL1	NA	NA	NA	NA	NA	NA	NA	NA	NA	NA	NA	NA	NA
NA	JAGN1	NA	NA	NA	NA	NA	NA	NA	NA	NA	NA	NA	NA	NA
NA	KARS	NA	NA	NA	NA	NA	NA	NA	NA	NA	NA	NA	NA	NA
NA	KAT2A	NA	NA	NA	NA	NA	NA	NA	NA	NA	NA	NA	NA	NA
NA	KAT5	NA	NA	NA	NA	NA	NA	NA	NA	NA	NA	NA	NA	NA
NA	KBTBD6	NA	NA	NA	NA	NA	NA	NA	NA	NA	NA	NA	NA	NA
NA	KBTBD7	NA	NA	NA	NA	NA	NA	NA	NA	NA	NA	NA	NA	NA
NA	KCNAB3	NA	NA	NA	NA	NA	NA	NA	NA	NA	NA	NA	NA	NA
NA	KCNE4	NA	NA	NA	NA	NA	NA	NA	NA	NA	NA	NA	NA	NA
NA	KCNIP3	NA	NA	NA	NA	NA	NA	NA	NA	NA	NA	NA	NA	NA
NA	KCNJ8	NA	NA	NA	NA	NA	NA	NA	NA	NA	NA	NA	NA	NA
NA	KCNK2	NA	NA	NA	NA	NA	NA	NA	NA	NA	NA	NA	NA	NA
NA	KCNQ5	NA	NA	NA	NA	NA	NA	NA	NA	NA	NA	NA	NA	NA
NA	KCTD3	NA	NA	NA	NA	NA	NA	NA	NA	NA	NA	NA	NA	NA
NA	KCTD6	NA	NA	NA	NA	NA	NA	NA	NA	NA	NA	NA	NA	NA
NA	KDELC2	NA	NA	NA	NA	NA	NA	NA	NA	NA	NA	NA	NA	NA
NA	KDM1A	NA	NA	NA	NA	NA	NA	NA	NA	NA	NA	NA	NA	NA
NA	KDM2B	NA	NA	NA	NA	NA	NA	NA	NA	NA	NA	NA	NA	NA
NA	KDM3B	NA	NA	NA	NA	NA	NA	NA	NA	NA	NA	NA	NA	NA
NA	KDM4D	NA	NA	NA	NA	NA	NA	NA	NA	NA	NA	NA	NA	NA
NA	KHDRBS1	NA	NA	NA	NA	NA	NA	NA	NA	NA	NA	NA	NA	NA
NA	KHDRBS3	NA	NA	NA	NA	NA	NA	NA	NA	NA	NA	NA	NA	NA
NA	KHK	NA	NA	NA	NA	NA	NA	NA	NA	NA	NA	NA	NA	NA
NA	KHSRP	NA	NA	NA	NA	NA	NA	NA	NA	NA	NA	NA	NA	NA
NA	KIAA0586	NA	NA	NA	NA	NA	NA	NA	NA	NA	NA	NA	NA	NA
NA	KIAA0753	NA	NA	NA	NA	NA	NA	NA	NA	NA	NA	NA	NA	NA
NA	KIAA1586	NA	NA	NA	NA	NA	NA	NA	NA	NA	NA	NA	NA	NA
NA	KIAA1841	NA	NA	NA	NA	NA	NA	NA	NA	NA	NA	NA	NA	NA
NA	KIF11	NA	NA	NA	NA	NA	NA	NA	NA	NA	NA	NA	NA	NA
NA	KIF13A	NA	NA	NA	NA	NA	NA	NA	NA	NA	NA	NA	NA	NA
NA	KIF14	NA	NA	NA	NA	NA	NA	NA	NA	NA	NA	NA	NA	NA
NA	KIF15	NA	NA	NA	NA	NA	NA	NA	NA	NA	NA	NA	NA	NA
NA	KIF18A	NA	NA	NA	NA	NA	NA	NA	NA	NA	NA	NA	NA	NA
NA	KIF18B	NA	NA	NA	NA	NA	NA	NA	NA	NA	NA	NA	NA	NA
NA	KIF20A	NA	NA	NA	NA	NA	NA	NA	NA	NA	NA	NA	NA	NA
NA	KIF20B	NA	NA	NA	NA	NA	NA	NA	NA	NA	NA	NA	NA	NA
NA	KIF22	NA	NA	NA	NA	NA	NA	NA	NA	NA	NA	NA	NA	NA
NA	KIF23	NA	NA	NA	NA	NA	NA	NA	NA	NA	NA	NA	NA	NA
NA	KIF24	NA	NA	NA	NA	NA	NA	NA	NA	NA	NA	NA	NA	NA
NA	KIF2A	NA	NA	NA	NA	NA	NA	NA	NA	NA	NA	NA	NA	NA
NA	KIF2C	NA	NA	NA	NA	NA	NA	NA	NA	NA	NA	NA	NA	NA
NA	KIF4A	NA	NA	NA	NA	NA	NA	NA	NA	NA	NA	NA	NA	NA
NA	KIFC1	NA	NA	NA	NA	NA	NA	NA	NA	NA	NA	NA	NA	NA
NA	KITLG	NA	NA	NA	NA	NA	NA	NA	NA	NA	NA	NA	NA	NA
NA	KLF3	NA	NA	NA	NA	NA	NA	NA	NA	NA	NA	NA	NA	NA
NA	KLHL11	NA	NA	NA	NA	NA	NA	NA	NA	NA	NA	NA	NA	NA
NA	KLHL13	NA	NA	NA	NA	NA	NA	NA	NA	NA	NA	NA	NA	NA
NA	KLHL15	NA	NA	NA	NA	NA	NA	NA	NA	NA	NA	NA	NA	NA
NA	KLHL8	NA	NA	NA	NA	NA	NA	NA	NA	NA	NA	NA	NA	NA
NA	KNTC1	NA	NA	NA	NA	NA	NA	NA	NA	NA	NA	NA	NA	NA
NA	KPNB1	NA	NA	NA	NA	NA	NA	NA	NA	NA	NA	NA	NA	NA
NA	KRI1	NA	NA	NA	NA	NA	NA	NA	NA	NA	NA	NA	NA	NA
NA	KRR1	NA	NA	NA	NA	NA	NA	NA	NA	NA	NA	NA	NA	NA
NA	KRT19	NA	NA	NA	NA	NA	NA	NA	NA	NA	NA	NA	NA	NA
NA	KRT7	NA	NA	NA	NA	NA	NA	NA	NA	NA	NA	NA	NA	NA
NA	KYNU	NA	NA	NA	NA	NA	NA	NA	NA	NA	NA	NA	NA	NA
NA	L2HGDH	NA	NA	NA	NA	NA	NA	NA	NA	NA	NA	NA	NA	NA
NA	LANCL1	NA	NA	NA	NA	NA	NA	NA	NA	NA	NA	NA	NA	NA
NA	LANCL2	NA	NA	NA	NA	NA	NA	NA	NA	NA	NA	NA	NA	NA
NA	LARP1	NA	NA	NA	NA	NA	NA	NA	NA	NA	NA	NA	NA	NA
NA	LARP4	NA	NA	NA	NA	NA	NA	NA	NA	NA	NA	NA	NA	NA
NA	LARP7	NA	NA	NA	NA	NA	NA	NA	NA	NA	NA	NA	NA	NA
NA	LARS	NA	NA	NA	NA	NA	NA	NA	NA	NA	NA	NA	NA	NA
NA	LARS2	NA	NA	NA	NA	NA	NA	NA	NA	NA	NA	NA	NA	NA
NA	LAS1L	NA	NA	NA	NA	NA	NA	NA	NA	NA	NA	NA	NA	NA
NA	LBR	NA	NA	NA	NA	NA	NA	NA	NA	NA	NA	NA	NA	NA
NA	LCMT2	NA	NA	NA	NA	NA	NA	NA	NA	NA	NA	NA	NA	NA
NA	LCORL	NA	NA	NA	NA	NA	NA	NA	NA	NA	NA	NA	NA	NA
NA	LCTL	NA	NA	NA	NA	NA	NA	NA	NA	NA	NA	NA	NA	NA
NA	LDB2	NA	NA	NA	NA	NA	NA	NA	NA	NA	NA	NA	NA	NA
NA	LDHB	NA	NA	NA	NA	NA	NA	NA	NA	NA	NA	NA	NA	NA
NA	LDLRAD3	NA	NA	NA	NA	NA	NA	NA	NA	NA	NA	NA	NA	NA
NA	LHFPL2	NA	NA	NA	NA	NA	NA	NA	NA	NA	NA	NA	NA	NA
NA	LIAS	NA	NA	NA	NA	NA	NA	NA	NA	NA	NA	NA	NA	NA
NA	LIFR	NA	NA	NA	NA	NA	NA	NA	NA	NA	NA	NA	NA	NA
NA	LIG1	NA	NA	NA	NA	NA	NA	NA	NA	NA	NA	NA	NA	NA
NA	LIG3	NA	NA	NA	NA	NA	NA	NA	NA	NA	NA	NA	NA	NA
NA	LIMD1	NA	NA	NA	NA	NA	NA	NA	NA	NA	NA	NA	NA	NA
NA	LIN52	NA	NA	NA	NA	NA	NA	NA	NA	NA	NA	NA	NA	NA
NA	LIN54	NA	NA	NA	NA	NA	NA	NA	NA	NA	NA	NA	NA	NA
NA	LIN7A	NA	NA	NA	NA	NA	NA	NA	NA	NA	NA	NA	NA	NA
NA	LIN9	NA	NA	NA	NA	NA	NA	NA	NA	NA	NA	NA	NA	NA
NA	LIPT1	NA	NA	NA	NA	NA	NA	NA	NA	NA	NA	NA	NA	NA
NA	LMAN2L	NA	NA	NA	NA	NA	NA	NA	NA	NA	NA	NA	NA	NA
NA	LMNB1	NA	NA	NA	NA	NA	NA	NA	NA	NA	NA	NA	NA	NA
NA	LMNB2	NA	NA	NA	NA	NA	NA	NA	NA	NA	NA	NA	NA	NA
NA	LMO4	NA	NA	NA	NA	NA	NA	NA	NA	NA	NA	NA	NA	NA
NA	LOC339803	NA	NA	NA	NA	NA	NA	NA	NA	NA	NA	NA	NA	NA
NA	LONP1	NA	NA	NA	NA	NA	NA	NA	NA	NA	NA	NA	NA	NA
NA	LONRF1	NA	NA	NA	NA	NA	NA	NA	NA	NA	NA	NA	NA	NA
NA	LPAR6	NA	NA	NA	NA	NA	NA	NA	NA	NA	NA	NA	NA	NA
NA	LPCAT1	NA	NA	NA	NA	NA	NA	NA	NA	NA	NA	NA	NA	NA
NA	LRIG3	NA	NA	NA	NA	NA	NA	NA	NA	NA	NA	NA	NA	NA
NA	LRP11	NA	NA	NA	NA	NA	NA	NA	NA	NA	NA	NA	NA	NA
NA	LRP4	NA	NA	NA	NA	NA	NA	NA	NA	NA	NA	NA	NA	NA
NA	LRPPRC	NA	NA	NA	NA	NA	NA	NA	NA	NA	NA	NA	NA	NA
NA	LRRC46	NA	NA	NA	NA	NA	NA	NA	NA	NA	NA	NA	NA	NA
NA	LRRC49	NA	NA	NA	NA	NA	NA	NA	NA	NA	NA	NA	NA	NA
NA	LRRC59	NA	NA	NA	NA	NA	NA	NA	NA	NA	NA	NA	NA	NA
NA	LRRC61	NA	NA	NA	NA	NA	NA	NA	NA	NA	NA	NA	NA	NA
NA	LRRC8B	NA	NA	NA	NA	NA	NA	NA	NA	NA	NA	NA	NA	NA
NA	LRRCC1	NA	NA	NA	NA	NA	NA	NA	NA	NA	NA	NA	NA	NA
NA	LRRN1	NA	NA	NA	NA	NA	NA	NA	NA	NA	NA	NA	NA	NA
NA	LRRTM2	NA	NA	NA	NA	NA	NA	NA	NA	NA	NA	NA	NA	NA
NA	LRTOMT	NA	NA	NA	NA	NA	NA	NA	NA	NA	NA	NA	NA	NA
NA	LSAMP	NA	NA	NA	NA	NA	NA	NA	NA	NA	NA	NA	NA	NA
NA	LSG1	NA	NA	NA	NA	NA	NA	NA	NA	NA	NA	NA	NA	NA
NA	LSM2	NA	NA	NA	NA	NA	NA	NA	NA	NA	NA	NA	NA	NA
NA	LSM5	NA	NA	NA	NA	NA	NA	NA	NA	NA	NA	NA	NA	NA
NA	LSM6	NA	NA	NA	NA	NA	NA	NA	NA	NA	NA	NA	NA	NA
NA	LSM7	NA	NA	NA	NA	NA	NA	NA	NA	NA	NA	NA	NA	NA
NA	LTV1	NA	NA	NA	NA	NA	NA	NA	NA	NA	NA	NA	NA	NA
NA	LUC7L	NA	NA	NA	NA	NA	NA	NA	NA	NA	NA	NA	NA	NA
NA	LXN	NA	NA	NA	NA	NA	NA	NA	NA	NA	NA	NA	NA	NA
NA	LYAR	NA	NA	NA	NA	NA	NA	NA	NA	NA	NA	NA	NA	NA
NA	LYPD1	NA	NA	NA	NA	NA	NA	NA	NA	NA	NA	NA	NA	NA
NA	LYPD6	NA	NA	NA	NA	NA	NA	NA	NA	NA	NA	NA	NA	NA
NA	LYRM1	NA	NA	NA	NA	NA	NA	NA	NA	NA	NA	NA	NA	NA
NA	LYRM2	NA	NA	NA	NA	NA	NA	NA	NA	NA	NA	NA	NA	NA
NA	LYRM4	NA	NA	NA	NA	NA	NA	NA	NA	NA	NA	NA	NA	NA
NA	LZIC	NA	NA	NA	NA	NA	NA	NA	NA	NA	NA	NA	NA	NA
NA	MAB21L2	NA	NA	NA	NA	NA	NA	NA	NA	NA	NA	NA	NA	NA
NA	MAD2L1	NA	NA	NA	NA	NA	NA	NA	NA	NA	NA	NA	NA	NA
NA	MAD2L2	NA	NA	NA	NA	NA	NA	NA	NA	NA	NA	NA	NA	NA
NA	MADD	NA	NA	NA	NA	NA	NA	NA	NA	NA	NA	NA	NA	NA
NA	MAGI3	NA	NA	NA	NA	NA	NA	NA	NA	NA	NA	NA	NA	NA
NA	MAGOHB	NA	NA	NA	NA	NA	NA	NA	NA	NA	NA	NA	NA	NA
NA	MAMLD1	NA	NA	NA	NA	NA	NA	NA	NA	NA	NA	NA	NA	NA
NA	MAN1A1	NA	NA	NA	NA	NA	NA	NA	NA	NA	NA	NA	NA	NA
NA	MAOB	NA	NA	NA	NA	NA	NA	NA	NA	NA	NA	NA	NA	NA
NA	MAP2K6	NA	NA	NA	NA	NA	NA	NA	NA	NA	NA	NA	NA	NA
NA	MAP3K14	NA	NA	NA	NA	NA	NA	NA	NA	NA	NA	NA	NA	NA
NA	MAP3K4	NA	NA	NA	NA	NA	NA	NA	NA	NA	NA	NA	NA	NA
NA	MAP3K5	NA	NA	NA	NA	NA	NA	NA	NA	NA	NA	NA	NA	NA
NA	MARCKS	NA	NA	NA	NA	NA	NA	NA	NA	NA	NA	NA	NA	NA
NA	MARK2	NA	NA	NA	NA	NA	NA	NA	NA	NA	NA	NA	NA	NA
NA	MASTL	NA	NA	NA	NA	NA	NA	NA	NA	NA	NA	NA	NA	NA
NA	MAT2A	NA	NA	NA	NA	NA	NA	NA	NA	NA	NA	NA	NA	NA
NA	MAT2B	NA	NA	NA	NA	NA	NA	NA	NA	NA	NA	NA	NA	NA
NA	MATN2	NA	NA	NA	NA	NA	NA	NA	NA	NA	NA	NA	NA	NA
NA	MATN3	NA	NA	NA	NA	NA	NA	NA	NA	NA	NA	NA	NA	NA
NA	MAZ	NA	NA	NA	NA	NA	NA	NA	NA	NA	NA	NA	NA	NA
NA	MBD3	NA	NA	NA	NA	NA	NA	NA	NA	NA	NA	NA	NA	NA
NA	MBNL3	NA	NA	NA	NA	NA	NA	NA	NA	NA	NA	NA	NA	NA
NA	MBOAT1	NA	NA	NA	NA	NA	NA	NA	NA	NA	NA	NA	NA	NA
NA	MBTD1	NA	NA	NA	NA	NA	NA	NA	NA	NA	NA	NA	NA	NA
NA	MC1R	NA	NA	NA	NA	NA	NA	NA	NA	NA	NA	NA	NA	NA
NA	MCCC2	NA	NA	NA	NA	NA	NA	NA	NA	NA	NA	NA	NA	NA
NA	MCM10	NA	NA	NA	NA	NA	NA	NA	NA	NA	NA	NA	NA	NA
NA	MCM2	NA	NA	NA	NA	NA	NA	NA	NA	NA	NA	NA	NA	NA
NA	MCM3	NA	NA	NA	NA	NA	NA	NA	NA	NA	NA	NA	NA	NA
NA	MCM4	NA	NA	NA	NA	NA	NA	NA	NA	NA	NA	NA	NA	NA
NA	MCM5	NA	NA	NA	NA	NA	NA	NA	NA	NA	NA	NA	NA	NA
NA	MCM6	NA	NA	NA	NA	NA	NA	NA	NA	NA	NA	NA	NA	NA
NA	MCM7	NA	NA	NA	NA	NA	NA	NA	NA	NA	NA	NA	NA	NA
NA	MCM8	NA	NA	NA	NA	NA	NA	NA	NA	NA	NA	NA	NA	NA
NA	MCM9	NA	NA	NA	NA	NA	NA	NA	NA	NA	NA	NA	NA	NA
NA	MCRS1	NA	NA	NA	NA	NA	NA	NA	NA	NA	NA	NA	NA	NA
NA	MDC1	NA	NA	NA	NA	NA	NA	NA	NA	NA	NA	NA	NA	NA
NA	MDFIC	NA	NA	NA	NA	NA	NA	NA	NA	NA	NA	NA	NA	NA
NA	MDK	NA	NA	NA	NA	NA	NA	NA	NA	NA	NA	NA	NA	NA
NA	MDM1	NA	NA	NA	NA	NA	NA	NA	NA	NA	NA	NA	NA	NA
NA	MDM4	NA	NA	NA	NA	NA	NA	NA	NA	NA	NA	NA	NA	NA
NA	MDN1	NA	NA	NA	NA	NA	NA	NA	NA	NA	NA	NA	NA	NA
NA	ME2	NA	NA	NA	NA	NA	NA	NA	NA	NA	NA	NA	NA	NA
NA	ME3	NA	NA	NA	NA	NA	NA	NA	NA	NA	NA	NA	NA	NA
NA	MECOM	NA	NA	NA	NA	NA	NA	NA	NA	NA	NA	NA	NA	NA
NA	MED1	NA	NA	NA	NA	NA	NA	NA	NA	NA	NA	NA	NA	NA
NA	MED10	NA	NA	NA	NA	NA	NA	NA	NA	NA	NA	NA	NA	NA
NA	MED18	NA	NA	NA	NA	NA	NA	NA	NA	NA	NA	NA	NA	NA
NA	MED21	NA	NA	NA	NA	NA	NA	NA	NA	NA	NA	NA	NA	NA
NA	MED22	NA	NA	NA	NA	NA	NA	NA	NA	NA	NA	NA	NA	NA
NA	MED24	NA	NA	NA	NA	NA	NA	NA	NA	NA	NA	NA	NA	NA
NA	MED28	NA	NA	NA	NA	NA	NA	NA	NA	NA	NA	NA	NA	NA
NA	MED4	NA	NA	NA	NA	NA	NA	NA	NA	NA	NA	NA	NA	NA
NA	MED6	NA	NA	NA	NA	NA	NA	NA	NA	NA	NA	NA	NA	NA
NA	MEF2C	NA	NA	NA	NA	NA	NA	NA	NA	NA	NA	NA	NA	NA
NA	MEIS1	NA	NA	NA	NA	NA	NA	NA	NA	NA	NA	NA	NA	NA
NA	MEIS2	NA	NA	NA	NA	NA	NA	NA	NA	NA	NA	NA	NA	NA
NA	MELK	NA	NA	NA	NA	NA	NA	NA	NA	NA	NA	NA	NA	NA
NA	MEN1	NA	NA	NA	NA	NA	NA	NA	NA	NA	NA	NA	NA	NA
NA	MEPCE	NA	NA	NA	NA	NA	NA	NA	NA	NA	NA	NA	NA	NA
NA	METAP1	NA	NA	NA	NA	NA	NA	NA	NA	NA	NA	NA	NA	NA
NA	METAP1D	NA	NA	NA	NA	NA	NA	NA	NA	NA	NA	NA	NA	NA
NA	METTL1	NA	NA	NA	NA	NA	NA	NA	NA	NA	NA	NA	NA	NA
NA	METTL4	NA	NA	NA	NA	NA	NA	NA	NA	NA	NA	NA	NA	NA
NA	METTL7A	NA	NA	NA	NA	NA	NA	NA	NA	NA	NA	NA	NA	NA
NA	MEX3B	NA	NA	NA	NA	NA	NA	NA	NA	NA	NA	NA	NA	NA
NA	MEX3D	NA	NA	NA	NA	NA	NA	NA	NA	NA	NA	NA	NA	NA
NA	MFHAS1	NA	NA	NA	NA	NA	NA	NA	NA	NA	NA	NA	NA	NA
NA	MFSD2A	NA	NA	NA	NA	NA	NA	NA	NA	NA	NA	NA	NA	NA
NA	MGA	NA	NA	NA	NA	NA	NA	NA	NA	NA	NA	NA	NA	NA
NA	MID1	NA	NA	NA	NA	NA	NA	NA	NA	NA	NA	NA	NA	NA
NA	MID1IP1	NA	NA	NA	NA	NA	NA	NA	NA	NA	NA	NA	NA	NA
NA	MID2	NA	NA	NA	NA	NA	NA	NA	NA	NA	NA	NA	NA	NA
NA	MIDN	NA	NA	NA	NA	NA	NA	NA	NA	NA	NA	NA	NA	NA
NA	MIOS	NA	NA	NA	NA	NA	NA	NA	NA	NA	NA	NA	NA	NA
NA	MIPEP	NA	NA	NA	NA	NA	NA	NA	NA	NA	NA	NA	NA	NA
NA	MIS12	NA	NA	NA	NA	NA	NA	NA	NA	NA	NA	NA	NA	NA
NA	MITD1	NA	NA	NA	NA	NA	NA	NA	NA	NA	NA	NA	NA	NA
NA	MKI67	NA	NA	NA	NA	NA	NA	NA	NA	NA	NA	NA	NA	NA
NA	MKS1	NA	NA	NA	NA	NA	NA	NA	NA	NA	NA	NA	NA	NA
NA	MLH1	NA	NA	NA	NA	NA	NA	NA	NA	NA	NA	NA	NA	NA
NA	MLLT10	NA	NA	NA	NA	NA	NA	NA	NA	NA	NA	NA	NA	NA
NA	MLLT3	NA	NA	NA	NA	NA	NA	NA	NA	NA	NA	NA	NA	NA
NA	MLPH	NA	NA	NA	NA	NA	NA	NA	NA	NA	NA	NA	NA	NA
NA	MMACHC	NA	NA	NA	NA	NA	NA	NA	NA	NA	NA	NA	NA	NA
NA	MMD	NA	NA	NA	NA	NA	NA	NA	NA	NA	NA	NA	NA	NA
NA	MMS22L	NA	NA	NA	NA	NA	NA	NA	NA	NA	NA	NA	NA	NA
NA	MND1	NA	NA	NA	NA	NA	NA	NA	NA	NA	NA	NA	NA	NA
NA	MNS1	NA	NA	NA	NA	NA	NA	NA	NA	NA	NA	NA	NA	NA
NA	MORC2	NA	NA	NA	NA	NA	NA	NA	NA	NA	NA	NA	NA	NA
NA	MORN2	NA	NA	NA	NA	NA	NA	NA	NA	NA	NA	NA	NA	NA
NA	MOXD1	NA	NA	NA	NA	NA	NA	NA	NA	NA	NA	NA	NA	NA
NA	MPDU1	NA	NA	NA	NA	NA	NA	NA	NA	NA	NA	NA	NA	NA
NA	MPHOSPH6	NA	NA	NA	NA	NA	NA	NA	NA	NA	NA	NA	NA	NA
NA	MPHOSPH9	NA	NA	NA	NA	NA	NA	NA	NA	NA	NA	NA	NA	NA
NA	MPP6	NA	NA	NA	NA	NA	NA	NA	NA	NA	NA	NA	NA	NA
NA	MRFAP1L1	NA	NA	NA	NA	NA	NA	NA	NA	NA	NA	NA	NA	NA
NA	MRPL1	NA	NA	NA	NA	NA	NA	NA	NA	NA	NA	NA	NA	NA
NA	MRPL13	NA	NA	NA	NA	NA	NA	NA	NA	NA	NA	NA	NA	NA
NA	MRPL15	NA	NA	NA	NA	NA	NA	NA	NA	NA	NA	NA	NA	NA
NA	MRPL18	NA	NA	NA	NA	NA	NA	NA	NA	NA	NA	NA	NA	NA
NA	MRPL24	NA	NA	NA	NA	NA	NA	NA	NA	NA	NA	NA	NA	NA
NA	MRPL3	NA	NA	NA	NA	NA	NA	NA	NA	NA	NA	NA	NA	NA
NA	MRPL30	NA	NA	NA	NA	NA	NA	NA	NA	NA	NA	NA	NA	NA
NA	MRPL35	NA	NA	NA	NA	NA	NA	NA	NA	NA	NA	NA	NA	NA
NA	MRPL38	NA	NA	NA	NA	NA	NA	NA	NA	NA	NA	NA	NA	NA
NA	MRPL39	NA	NA	NA	NA	NA	NA	NA	NA	NA	NA	NA	NA	NA
NA	MRPL42	NA	NA	NA	NA	NA	NA	NA	NA	NA	NA	NA	NA	NA
NA	MRPL44	NA	NA	NA	NA	NA	NA	NA	NA	NA	NA	NA	NA	NA
NA	MRPL47	NA	NA	NA	NA	NA	NA	NA	NA	NA	NA	NA	NA	NA
NA	MRPL48	NA	NA	NA	NA	NA	NA	NA	NA	NA	NA	NA	NA	NA
NA	MRPL9	NA	NA	NA	NA	NA	NA	NA	NA	NA	NA	NA	NA	NA
NA	MRPS12	NA	NA	NA	NA	NA	NA	NA	NA	NA	NA	NA	NA	NA
NA	MRPS14	NA	NA	NA	NA	NA	NA	NA	NA	NA	NA	NA	NA	NA
NA	MRPS15	NA	NA	NA	NA	NA	NA	NA	NA	NA	NA	NA	NA	NA
NA	MRPS16	NA	NA	NA	NA	NA	NA	NA	NA	NA	NA	NA	NA	NA
NA	MRPS17	NA	NA	NA	NA	NA	NA	NA	NA	NA	NA	NA	NA	NA
NA	MRPS18B	NA	NA	NA	NA	NA	NA	NA	NA	NA	NA	NA	NA	NA
NA	MRPS2	NA	NA	NA	NA	NA	NA	NA	NA	NA	NA	NA	NA	NA
NA	MRPS23	NA	NA	NA	NA	NA	NA	NA	NA	NA	NA	NA	NA	NA
NA	MRPS27	NA	NA	NA	NA	NA	NA	NA	NA	NA	NA	NA	NA	NA
NA	MRPS28	NA	NA	NA	NA	NA	NA	NA	NA	NA	NA	NA	NA	NA
NA	MRPS30	NA	NA	NA	NA	NA	NA	NA	NA	NA	NA	NA	NA	NA
NA	MRPS31	NA	NA	NA	NA	NA	NA	NA	NA	NA	NA	NA	NA	NA
NA	MRPS35	NA	NA	NA	NA	NA	NA	NA	NA	NA	NA	NA	NA	NA
NA	MRPS9	NA	NA	NA	NA	NA	NA	NA	NA	NA	NA	NA	NA	NA
NA	MRRF	NA	NA	NA	NA	NA	NA	NA	NA	NA	NA	NA	NA	NA
NA	MRTO4	NA	NA	NA	NA	NA	NA	NA	NA	NA	NA	NA	NA	NA
NA	MSH2	NA	NA	NA	NA	NA	NA	NA	NA	NA	NA	NA	NA	NA
NA	MSH6	NA	NA	NA	NA	NA	NA	NA	NA	NA	NA	NA	NA	NA
NA	MSL1	NA	NA	NA	NA	NA	NA	NA	NA	NA	NA	NA	NA	NA
NA	MSL2	NA	NA	NA	NA	NA	NA	NA	NA	NA	NA	NA	NA	NA
NA	MT1A	NA	NA	NA	NA	NA	NA	NA	NA	NA	NA	NA	NA	NA
NA	MTA1	NA	NA	NA	NA	NA	NA	NA	NA	NA	NA	NA	NA	NA
NA	MTA2	NA	NA	NA	NA	NA	NA	NA	NA	NA	NA	NA	NA	NA
NA	MTBP	NA	NA	NA	NA	NA	NA	NA	NA	NA	NA	NA	NA	NA
NA	MTF2	NA	NA	NA	NA	NA	NA	NA	NA	NA	NA	NA	NA	NA
NA	MTFP1	NA	NA	NA	NA	NA	NA	NA	NA	NA	NA	NA	NA	NA
NA	MTHFD1	NA	NA	NA	NA	NA	NA	NA	NA	NA	NA	NA	NA	NA
NA	MTIF2	NA	NA	NA	NA	NA	NA	NA	NA	NA	NA	NA	NA	NA
NA	MTMR11	NA	NA	NA	NA	NA	NA	NA	NA	NA	NA	NA	NA	NA
NA	MTMR2	NA	NA	NA	NA	NA	NA	NA	NA	NA	NA	NA	NA	NA
NA	MTMR4	NA	NA	NA	NA	NA	NA	NA	NA	NA	NA	NA	NA	NA
NA	MTR	NA	NA	NA	NA	NA	NA	NA	NA	NA	NA	NA	NA	NA
NA	MTRF1	NA	NA	NA	NA	NA	NA	NA	NA	NA	NA	NA	NA	NA
NA	MTRR	NA	NA	NA	NA	NA	NA	NA	NA	NA	NA	NA	NA	NA
NA	MTSS1L	NA	NA	NA	NA	NA	NA	NA	NA	NA	NA	NA	NA	NA
NA	MXD3	NA	NA	NA	NA	NA	NA	NA	NA	NA	NA	NA	NA	NA
NA	MYB	NA	NA	NA	NA	NA	NA	NA	NA	NA	NA	NA	NA	NA
NA	MYBBP1A	NA	NA	NA	NA	NA	NA	NA	NA	NA	NA	NA	NA	NA
NA	MYBL2	NA	NA	NA	NA	NA	NA	NA	NA	NA	NA	NA	NA	NA
NA	MYH10	NA	NA	NA	NA	NA	NA	NA	NA	NA	NA	NA	NA	NA
NA	MYNN	NA	NA	NA	NA	NA	NA	NA	NA	NA	NA	NA	NA	NA
NA	MYO19	NA	NA	NA	NA	NA	NA	NA	NA	NA	NA	NA	NA	NA
NA	MYPN	NA	NA	NA	NA	NA	NA	NA	NA	NA	NA	NA	NA	NA
NA	N4BP2	NA	NA	NA	NA	NA	NA	NA	NA	NA	NA	NA	NA	NA
NA	N6AMT1	NA	NA	NA	NA	NA	NA	NA	NA	NA	NA	NA	NA	NA
NA	NAA15	NA	NA	NA	NA	NA	NA	NA	NA	NA	NA	NA	NA	NA
NA	NAA16	NA	NA	NA	NA	NA	NA	NA	NA	NA	NA	NA	NA	NA
NA	NAA25	NA	NA	NA	NA	NA	NA	NA	NA	NA	NA	NA	NA	NA
NA	NAA50	NA	NA	NA	NA	NA	NA	NA	NA	NA	NA	NA	NA	NA
NA	NAB2	NA	NA	NA	NA	NA	NA	NA	NA	NA	NA	NA	NA	NA
NA	NACA	NA	NA	NA	NA	NA	NA	NA	NA	NA	NA	NA	NA	NA
NA	NAF1	NA	NA	NA	NA	NA	NA	NA	NA	NA	NA	NA	NA	NA
NA	NAGA	NA	NA	NA	NA	NA	NA	NA	NA	NA	NA	NA	NA	NA
NA	NAP1L4	NA	NA	NA	NA	NA	NA	NA	NA	NA	NA	NA	NA	NA
NA	NAPEPLD	NA	NA	NA	NA	NA	NA	NA	NA	NA	NA	NA	NA	NA
NA	NARS2	NA	NA	NA	NA	NA	NA	NA	NA	NA	NA	NA	NA	NA
NA	NASP	NA	NA	NA	NA	NA	NA	NA	NA	NA	NA	NA	NA	NA
NA	NAT10	NA	NA	NA	NA	NA	NA	NA	NA	NA	NA	NA	NA	NA
NA	NAV2	NA	NA	NA	NA	NA	NA	NA	NA	NA	NA	NA	NA	NA
NA	NBN	NA	NA	NA	NA	NA	NA	NA	NA	NA	NA	NA	NA	NA
NA	NBPF3	NA	NA	NA	NA	NA	NA	NA	NA	NA	NA	NA	NA	NA
NA	NCAPD2	NA	NA	NA	NA	NA	NA	NA	NA	NA	NA	NA	NA	NA
NA	NCAPD3	NA	NA	NA	NA	NA	NA	NA	NA	NA	NA	NA	NA	NA
NA	NCAPG	NA	NA	NA	NA	NA	NA	NA	NA	NA	NA	NA	NA	NA
NA	NCAPG2	NA	NA	NA	NA	NA	NA	NA	NA	NA	NA	NA	NA	NA
NA	NCAPH	NA	NA	NA	NA	NA	NA	NA	NA	NA	NA	NA	NA	NA
NA	NCAPH2	NA	NA	NA	NA	NA	NA	NA	NA	NA	NA	NA	NA	NA
NA	NCBP1	NA	NA	NA	NA	NA	NA	NA	NA	NA	NA	NA	NA	NA
NA	NCL	NA	NA	NA	NA	NA	NA	NA	NA	NA	NA	NA	NA	NA
NA	NCOA5	NA	NA	NA	NA	NA	NA	NA	NA	NA	NA	NA	NA	NA
NA	NCOA6	NA	NA	NA	NA	NA	NA	NA	NA	NA	NA	NA	NA	NA
NA	NDC80	NA	NA	NA	NA	NA	NA	NA	NA	NA	NA	NA	NA	NA
NA	NDE1	NA	NA	NA	NA	NA	NA	NA	NA	NA	NA	NA	NA	NA
NA	NDP	NA	NA	NA	NA	NA	NA	NA	NA	NA	NA	NA	NA	NA
NA	NDUFA9	NA	NA	NA	NA	NA	NA	NA	NA	NA	NA	NA	NA	NA
NA	NDUFAF4	NA	NA	NA	NA	NA	NA	NA	NA	NA	NA	NA	NA	NA
NA	NEDD1	NA	NA	NA	NA	NA	NA	NA	NA	NA	NA	NA	NA	NA
NA	NEFH	NA	NA	NA	NA	NA	NA	NA	NA	NA	NA	NA	NA	NA
NA	NEIL3	NA	NA	NA	NA	NA	NA	NA	NA	NA	NA	NA	NA	NA
NA	NEK2	NA	NA	NA	NA	NA	NA	NA	NA	NA	NA	NA	NA	NA
NA	NEK4	NA	NA	NA	NA	NA	NA	NA	NA	NA	NA	NA	NA	NA
NA	NETO2	NA	NA	NA	NA	NA	NA	NA	NA	NA	NA	NA	NA	NA
NA	NFATC3	NA	NA	NA	NA	NA	NA	NA	NA	NA	NA	NA	NA	NA
NA	NFE2L2	NA	NA	NA	NA	NA	NA	NA	NA	NA	NA	NA	NA	NA
NA	NFIA	NA	NA	NA	NA	NA	NA	NA	NA	NA	NA	NA	NA	NA
NA	NFIB	NA	NA	NA	NA	NA	NA	NA	NA	NA	NA	NA	NA	NA
NA	NFIC	NA	NA	NA	NA	NA	NA	NA	NA	NA	NA	NA	NA	NA
NA	NFIL3	NA	NA	NA	NA	NA	NA	NA	NA	NA	NA	NA	NA	NA
NA	NFIX	NA	NA	NA	NA	NA	NA	NA	NA	NA	NA	NA	NA	NA
NA	NFKBID	NA	NA	NA	NA	NA	NA	NA	NA	NA	NA	NA	NA	NA
NA	NFRKB	NA	NA	NA	NA	NA	NA	NA	NA	NA	NA	NA	NA	NA
NA	NFX1	NA	NA	NA	NA	NA	NA	NA	NA	NA	NA	NA	NA	NA
NA	NFYA	NA	NA	NA	NA	NA	NA	NA	NA	NA	NA	NA	NA	NA
NA	NFYB	NA	NA	NA	NA	NA	NA	NA	NA	NA	NA	NA	NA	NA
NA	NFYC	NA	NA	NA	NA	NA	NA	NA	NA	NA	NA	NA	NA	NA
NA	NHEJ1	NA	NA	NA	NA	NA	NA	NA	NA	NA	NA	NA	NA	NA
NA	NHLRC3	NA	NA	NA	NA	NA	NA	NA	NA	NA	NA	NA	NA	NA
NA	NHP2	NA	NA	NA	NA	NA	NA	NA	NA	NA	NA	NA	NA	NA
NA	NHSL1	NA	NA	NA	NA	NA	NA	NA	NA	NA	NA	NA	NA	NA
NA	NID1	NA	NA	NA	NA	NA	NA	NA	NA	NA	NA	NA	NA	NA
NA	NID2	NA	NA	NA	NA	NA	NA	NA	NA	NA	NA	NA	NA	NA
NA	NIF3L1	NA	NA	NA	NA	NA	NA	NA	NA	NA	NA	NA	NA	NA
NA	NIN	NA	NA	NA	NA	NA	NA	NA	NA	NA	NA	NA	NA	NA
NA	NIP7	NA	NA	NA	NA	NA	NA	NA	NA	NA	NA	NA	NA	NA
NA	NKAPL	NA	NA	NA	NA	NA	NA	NA	NA	NA	NA	NA	NA	NA
NA	NKRF	NA	NA	NA	NA	NA	NA	NA	NA	NA	NA	NA	NA	NA
NA	NLE1	NA	NA	NA	NA	NA	NA	NA	NA	NA	NA	NA	NA	NA
NA	NLN	NA	NA	NA	NA	NA	NA	NA	NA	NA	NA	NA	NA	NA
NA	NNAT	NA	NA	NA	NA	NA	NA	NA	NA	NA	NA	NA	NA	NA
NA	NOB1	NA	NA	NA	NA	NA	NA	NA	NA	NA	NA	NA	NA	NA
NA	NOC2L	NA	NA	NA	NA	NA	NA	NA	NA	NA	NA	NA	NA	NA
NA	NOC3L	NA	NA	NA	NA	NA	NA	NA	NA	NA	NA	NA	NA	NA
NA	NOC4L	NA	NA	NA	NA	NA	NA	NA	NA	NA	NA	NA	NA	NA
NA	NOD1	NA	NA	NA	NA	NA	NA	NA	NA	NA	NA	NA	NA	NA
NA	NOL11	NA	NA	NA	NA	NA	NA	NA	NA	NA	NA	NA	NA	NA
NA	NOL12	NA	NA	NA	NA	NA	NA	NA	NA	NA	NA	NA	NA	NA
NA	NOL6	NA	NA	NA	NA	NA	NA	NA	NA	NA	NA	NA	NA	NA
NA	NOL8	NA	NA	NA	NA	NA	NA	NA	NA	NA	NA	NA	NA	NA
NA	NOL9	NA	NA	NA	NA	NA	NA	NA	NA	NA	NA	NA	NA	NA
NA	NOLC1	NA	NA	NA	NA	NA	NA	NA	NA	NA	NA	NA	NA	NA
NA	NONO	NA	NA	NA	NA	NA	NA	NA	NA	NA	NA	NA	NA	NA
NA	NOP16	NA	NA	NA	NA	NA	NA	NA	NA	NA	NA	NA	NA	NA
NA	NOP2	NA	NA	NA	NA	NA	NA	NA	NA	NA	NA	NA	NA	NA
NA	NOP58	NA	NA	NA	NA	NA	NA	NA	NA	NA	NA	NA	NA	NA
NA	NOV	NA	NA	NA	NA	NA	NA	NA	NA	NA	NA	NA	NA	NA
NA	NOVA1	NA	NA	NA	NA	NA	NA	NA	NA	NA	NA	NA	NA	NA
NA	NPAT	NA	NA	NA	NA	NA	NA	NA	NA	NA	NA	NA	NA	NA
NA	NPM1	NA	NA	NA	NA	NA	NA	NA	NA	NA	NA	NA	NA	NA
NA	NPM3	NA	NA	NA	NA	NA	NA	NA	NA	NA	NA	NA	NA	NA
NA	NPR3	NA	NA	NA	NA	NA	NA	NA	NA	NA	NA	NA	NA	NA
NA	NPRL3	NA	NA	NA	NA	NA	NA	NA	NA	NA	NA	NA	NA	NA
NA	NPTX1	NA	NA	NA	NA	NA	NA	NA	NA	NA	NA	NA	NA	NA
NA	NQO1	NA	NA	NA	NA	NA	NA	NA	NA	NA	NA	NA	NA	NA
NA	NQO2	NA	NA	NA	NA	NA	NA	NA	NA	NA	NA	NA	NA	NA
NA	NR1D2	NA	NA	NA	NA	NA	NA	NA	NA	NA	NA	NA	NA	NA
NA	NR2C2	NA	NA	NA	NA	NA	NA	NA	NA	NA	NA	NA	NA	NA
NA	NR2C2AP	NA	NA	NA	NA	NA	NA	NA	NA	NA	NA	NA	NA	NA
NA	NR2F1	NA	NA	NA	NA	NA	NA	NA	NA	NA	NA	NA	NA	NA
NA	NR4A1	NA	NA	NA	NA	NA	NA	NA	NA	NA	NA	NA	NA	NA
NA	NR4A2	NA	NA	NA	NA	NA	NA	NA	NA	NA	NA	NA	NA	NA
NA	NRF1	NA	NA	NA	NA	NA	NA	NA	NA	NA	NA	NA	NA	NA
NA	NRGN	NA	NA	NA	NA	NA	NA	NA	NA	NA	NA	NA	NA	NA
NA	NRIP1	NA	NA	NA	NA	NA	NA	NA	NA	NA	NA	NA	NA	NA
NA	NRM	NA	NA	NA	NA	NA	NA	NA	NA	NA	NA	NA	NA	NA
NA	NRP1	NA	NA	NA	NA	NA	NA	NA	NA	NA	NA	NA	NA	NA
NA	NRP2	NA	NA	NA	NA	NA	NA	NA	NA	NA	NA	NA	NA	NA
NA	NSD1	NA	NA	NA	NA	NA	NA	NA	NA	NA	NA	NA	NA	NA
NA	NSL1	NA	NA	NA	NA	NA	NA	NA	NA	NA	NA	NA	NA	NA
NA	NSMAF	NA	NA	NA	NA	NA	NA	NA	NA	NA	NA	NA	NA	NA
NA	NSMCE2	NA	NA	NA	NA	NA	NA	NA	NA	NA	NA	NA	NA	NA
NA	NSMCE4A	NA	NA	NA	NA	NA	NA	NA	NA	NA	NA	NA	NA	NA
NA	NSUN3	NA	NA	NA	NA	NA	NA	NA	NA	NA	NA	NA	NA	NA
NA	NSUN4	NA	NA	NA	NA	NA	NA	NA	NA	NA	NA	NA	NA	NA
NA	NSUN6	NA	NA	NA	NA	NA	NA	NA	NA	NA	NA	NA	NA	NA
NA	NT5DC2	NA	NA	NA	NA	NA	NA	NA	NA	NA	NA	NA	NA	NA
NA	NUBP1	NA	NA	NA	NA	NA	NA	NA	NA	NA	NA	NA	NA	NA
NA	NUBPL	NA	NA	NA	NA	NA	NA	NA	NA	NA	NA	NA	NA	NA
NA	NUCKS1	NA	NA	NA	NA	NA	NA	NA	NA	NA	NA	NA	NA	NA
NA	NUDC	NA	NA	NA	NA	NA	NA	NA	NA	NA	NA	NA	NA	NA
NA	NUDCD2	NA	NA	NA	NA	NA	NA	NA	NA	NA	NA	NA	NA	NA
NA	NUDT11	NA	NA	NA	NA	NA	NA	NA	NA	NA	NA	NA	NA	NA
NA	NUDT12	NA	NA	NA	NA	NA	NA	NA	NA	NA	NA	NA	NA	NA
NA	NUDT13	NA	NA	NA	NA	NA	NA	NA	NA	NA	NA	NA	NA	NA
NA	NUDT15	NA	NA	NA	NA	NA	NA	NA	NA	NA	NA	NA	NA	NA
NA	NUDT2	NA	NA	NA	NA	NA	NA	NA	NA	NA	NA	NA	NA	NA
NA	NUDT21	NA	NA	NA	NA	NA	NA	NA	NA	NA	NA	NA	NA	NA
NA	NUF2	NA	NA	NA	NA	NA	NA	NA	NA	NA	NA	NA	NA	NA
NA	NUFIP1	NA	NA	NA	NA	NA	NA	NA	NA	NA	NA	NA	NA	NA
NA	NUMA1	NA	NA	NA	NA	NA	NA	NA	NA	NA	NA	NA	NA	NA
NA	NUP107	NA	NA	NA	NA	NA	NA	NA	NA	NA	NA	NA	NA	NA
NA	NUP133	NA	NA	NA	NA	NA	NA	NA	NA	NA	NA	NA	NA	NA
NA	NUP153	NA	NA	NA	NA	NA	NA	NA	NA	NA	NA	NA	NA	NA
NA	NUP155	NA	NA	NA	NA	NA	NA	NA	NA	NA	NA	NA	NA	NA
NA	NUP160	NA	NA	NA	NA	NA	NA	NA	NA	NA	NA	NA	NA	NA
NA	NUP188	NA	NA	NA	NA	NA	NA	NA	NA	NA	NA	NA	NA	NA
NA	NUP205	NA	NA	NA	NA	NA	NA	NA	NA	NA	NA	NA	NA	NA
NA	NUP214	NA	NA	NA	NA	NA	NA	NA	NA	NA	NA	NA	NA	NA
NA	NUP35	NA	NA	NA	NA	NA	NA	NA	NA	NA	NA	NA	NA	NA
NA	NUP37	NA	NA	NA	NA	NA	NA	NA	NA	NA	NA	NA	NA	NA
NA	NUP43	NA	NA	NA	NA	NA	NA	NA	NA	NA	NA	NA	NA	NA
NA	NUP50	NA	NA	NA	NA	NA	NA	NA	NA	NA	NA	NA	NA	NA
NA	NUP54	NA	NA	NA	NA	NA	NA	NA	NA	NA	NA	NA	NA	NA
NA	NUP85	NA	NA	NA	NA	NA	NA	NA	NA	NA	NA	NA	NA	NA
NA	NUP88	NA	NA	NA	NA	NA	NA	NA	NA	NA	NA	NA	NA	NA
NA	NUP93	NA	NA	NA	NA	NA	NA	NA	NA	NA	NA	NA	NA	NA
NA	NUP98	NA	NA	NA	NA	NA	NA	NA	NA	NA	NA	NA	NA	NA
NA	NUSAP1	NA	NA	NA	NA	NA	NA	NA	NA	NA	NA	NA	NA	NA
NA	NVL	NA	NA	NA	NA	NA	NA	NA	NA	NA	NA	NA	NA	NA
NA	NXT2	NA	NA	NA	NA	NA	NA	NA	NA	NA	NA	NA	NA	NA
NA	OAS3	NA	NA	NA	NA	NA	NA	NA	NA	NA	NA	NA	NA	NA
NA	OCLM	NA	NA	NA	NA	NA	NA	NA	NA	NA	NA	NA	NA	NA
NA	ODC1	NA	NA	NA	NA	NA	NA	NA	NA	NA	NA	NA	NA	NA
NA	ODF2	NA	NA	NA	NA	NA	NA	NA	NA	NA	NA	NA	NA	NA
NA	OGG1	NA	NA	NA	NA	NA	NA	NA	NA	NA	NA	NA	NA	NA
NA	OIP5	NA	NA	NA	NA	NA	NA	NA	NA	NA	NA	NA	NA	NA
NA	OLFML2B	NA	NA	NA	NA	NA	NA	NA	NA	NA	NA	NA	NA	NA
NA	OLFML3	NA	NA	NA	NA	NA	NA	NA	NA	NA	NA	NA	NA	NA
NA	ORC1	NA	NA	NA	NA	NA	NA	NA	NA	NA	NA	NA	NA	NA
NA	ORC2	NA	NA	NA	NA	NA	NA	NA	NA	NA	NA	NA	NA	NA
NA	ORC5	NA	NA	NA	NA	NA	NA	NA	NA	NA	NA	NA	NA	NA
NA	ORC6	NA	NA	NA	NA	NA	NA	NA	NA	NA	NA	NA	NA	NA
NA	OSBPL9	NA	NA	NA	NA	NA	NA	NA	NA	NA	NA	NA	NA	NA
NA	OSGEPL1	NA	NA	NA	NA	NA	NA	NA	NA	NA	NA	NA	NA	NA
NA	OXNAD1	NA	NA	NA	NA	NA	NA	NA	NA	NA	NA	NA	NA	NA
NA	PA2G4	NA	NA	NA	NA	NA	NA	NA	NA	NA	NA	NA	NA	NA
NA	PACRGL	NA	NA	NA	NA	NA	NA	NA	NA	NA	NA	NA	NA	NA
NA	PAFAH1B3	NA	NA	NA	NA	NA	NA	NA	NA	NA	NA	NA	NA	NA
NA	PAICS	NA	NA	NA	NA	NA	NA	NA	NA	NA	NA	NA	NA	NA
NA	PAK1IP1	NA	NA	NA	NA	NA	NA	NA	NA	NA	NA	NA	NA	NA
NA	PAK3	NA	NA	NA	NA	NA	NA	NA	NA	NA	NA	NA	NA	NA
NA	PAK4	NA	NA	NA	NA	NA	NA	NA	NA	NA	NA	NA	NA	NA
NA	PALB2	NA	NA	NA	NA	NA	NA	NA	NA	NA	NA	NA	NA	NA
NA	PAN2	NA	NA	NA	NA	NA	NA	NA	NA	NA	NA	NA	NA	NA
NA	PAN3	NA	NA	NA	NA	NA	NA	NA	NA	NA	NA	NA	NA	NA
NA	PAQR4	NA	NA	NA	NA	NA	NA	NA	NA	NA	NA	NA	NA	NA
NA	PAQR5	NA	NA	NA	NA	NA	NA	NA	NA	NA	NA	NA	NA	NA
NA	PARN	NA	NA	NA	NA	NA	NA	NA	NA	NA	NA	NA	NA	NA
NA	PARP1	NA	NA	NA	NA	NA	NA	NA	NA	NA	NA	NA	NA	NA
NA	PARP2	NA	NA	NA	NA	NA	NA	NA	NA	NA	NA	NA	NA	NA
NA	PARP9	NA	NA	NA	NA	NA	NA	NA	NA	NA	NA	NA	NA	NA
NA	PASK	NA	NA	NA	NA	NA	NA	NA	NA	NA	NA	NA	NA	NA
NA	PATL1	NA	NA	NA	NA	NA	NA	NA	NA	NA	NA	NA	NA	NA
NA	PATZ1	NA	NA	NA	NA	NA	NA	NA	NA	NA	NA	NA	NA	NA
NA	PAXIP1	NA	NA	NA	NA	NA	NA	NA	NA	NA	NA	NA	NA	NA
NA	PBK	NA	NA	NA	NA	NA	NA	NA	NA	NA	NA	NA	NA	NA
NA	PBRM1	NA	NA	NA	NA	NA	NA	NA	NA	NA	NA	NA	NA	NA
NA	PBX1	NA	NA	NA	NA	NA	NA	NA	NA	NA	NA	NA	NA	NA
NA	PBX3	NA	NA	NA	NA	NA	NA	NA	NA	NA	NA	NA	NA	NA
NA	PCBP1	NA	NA	NA	NA	NA	NA	NA	NA	NA	NA	NA	NA	NA
NA	PCCA	NA	NA	NA	NA	NA	NA	NA	NA	NA	NA	NA	NA	NA
NA	PCDH18	NA	NA	NA	NA	NA	NA	NA	NA	NA	NA	NA	NA	NA
NA	PCF11	NA	NA	NA	NA	NA	NA	NA	NA	NA	NA	NA	NA	NA
NA	PCGF6	NA	NA	NA	NA	NA	NA	NA	NA	NA	NA	NA	NA	NA
NA	PCID2	NA	NA	NA	NA	NA	NA	NA	NA	NA	NA	NA	NA	NA
NA	PCIF1	NA	NA	NA	NA	NA	NA	NA	NA	NA	NA	NA	NA	NA
NA	PCM1	NA	NA	NA	NA	NA	NA	NA	NA	NA	NA	NA	NA	NA
NA	PCNA	NA	NA	NA	NA	NA	NA	NA	NA	NA	NA	NA	NA	NA
NA	PCNT	NA	NA	NA	NA	NA	NA	NA	NA	NA	NA	NA	NA	NA
NA	PCOLCE	NA	NA	NA	NA	NA	NA	NA	NA	NA	NA	NA	NA	NA
NA	PDCD11	NA	NA	NA	NA	NA	NA	NA	NA	NA	NA	NA	NA	NA
NA	PDE3B	NA	NA	NA	NA	NA	NA	NA	NA	NA	NA	NA	NA	NA
NA	PDE7A	NA	NA	NA	NA	NA	NA	NA	NA	NA	NA	NA	NA	NA
NA	PDE7B	NA	NA	NA	NA	NA	NA	NA	NA	NA	NA	NA	NA	NA
NA	PDGFD	NA	NA	NA	NA	NA	NA	NA	NA	NA	NA	NA	NA	NA
NA	PDGFRA	NA	NA	NA	NA	NA	NA	NA	NA	NA	NA	NA	NA	NA
NA	PDIA4	NA	NA	NA	NA	NA	NA	NA	NA	NA	NA	NA	NA	NA
NA	PDIK1L	NA	NA	NA	NA	NA	NA	NA	NA	NA	NA	NA	NA	NA
NA	PDP2	NA	NA	NA	NA	NA	NA	NA	NA	NA	NA	NA	NA	NA
NA	PDS5B	NA	NA	NA	NA	NA	NA	NA	NA	NA	NA	NA	NA	NA
NA	PDSS1	NA	NA	NA	NA	NA	NA	NA	NA	NA	NA	NA	NA	NA
NA	PDSS2	NA	NA	NA	NA	NA	NA	NA	NA	NA	NA	NA	NA	NA
NA	PDZRN3	NA	NA	NA	NA	NA	NA	NA	NA	NA	NA	NA	NA	NA
NA	PECR	NA	NA	NA	NA	NA	NA	NA	NA	NA	NA	NA	NA	NA
NA	PEG10	NA	NA	NA	NA	NA	NA	NA	NA	NA	NA	NA	NA	NA
NA	PELI1	NA	NA	NA	NA	NA	NA	NA	NA	NA	NA	NA	NA	NA
NA	PELI2	NA	NA	NA	NA	NA	NA	NA	NA	NA	NA	NA	NA	NA
NA	PELP1	NA	NA	NA	NA	NA	NA	NA	NA	NA	NA	NA	NA	NA
NA	PER2	NA	NA	NA	NA	NA	NA	NA	NA	NA	NA	NA	NA	NA
NA	PER3	NA	NA	NA	NA	NA	NA	NA	NA	NA	NA	NA	NA	NA
NA	PES1	NA	NA	NA	NA	NA	NA	NA	NA	NA	NA	NA	NA	NA
NA	PEX1	NA	NA	NA	NA	NA	NA	NA	NA	NA	NA	NA	NA	NA
NA	PEX12	NA	NA	NA	NA	NA	NA	NA	NA	NA	NA	NA	NA	NA
NA	PFAS	NA	NA	NA	NA	NA	NA	NA	NA	NA	NA	NA	NA	NA
NA	PFKM	NA	NA	NA	NA	NA	NA	NA	NA	NA	NA	NA	NA	NA
NA	PGBD1	NA	NA	NA	NA	NA	NA	NA	NA	NA	NA	NA	NA	NA
NA	PGBD2	NA	NA	NA	NA	NA	NA	NA	NA	NA	NA	NA	NA	NA
NA	PGD	NA	NA	NA	NA	NA	NA	NA	NA	NA	NA	NA	NA	NA
NA	PHACTR4	NA	NA	NA	NA	NA	NA	NA	NA	NA	NA	NA	NA	NA
NA	PHB2	NA	NA	NA	NA	NA	NA	NA	NA	NA	NA	NA	NA	NA
NA	PHC1	NA	NA	NA	NA	NA	NA	NA	NA	NA	NA	NA	NA	NA
NA	PHF14	NA	NA	NA	NA	NA	NA	NA	NA	NA	NA	NA	NA	NA
NA	PHF19	NA	NA	NA	NA	NA	NA	NA	NA	NA	NA	NA	NA	NA
NA	PHF2	NA	NA	NA	NA	NA	NA	NA	NA	NA	NA	NA	NA	NA
NA	PHF3	NA	NA	NA	NA	NA	NA	NA	NA	NA	NA	NA	NA	NA
NA	PHF5A	NA	NA	NA	NA	NA	NA	NA	NA	NA	NA	NA	NA	NA
NA	PHF6	NA	NA	NA	NA	NA	NA	NA	NA	NA	NA	NA	NA	NA
NA	PHF7	NA	NA	NA	NA	NA	NA	NA	NA	NA	NA	NA	NA	NA
NA	PHGDH	NA	NA	NA	NA	NA	NA	NA	NA	NA	NA	NA	NA	NA
NA	PHIP	NA	NA	NA	NA	NA	NA	NA	NA	NA	NA	NA	NA	NA
NA	PHKA2	NA	NA	NA	NA	NA	NA	NA	NA	NA	NA	NA	NA	NA
NA	PHLDA1	NA	NA	NA	NA	NA	NA	NA	NA	NA	NA	NA	NA	NA
NA	PHLPP1	NA	NA	NA	NA	NA	NA	NA	NA	NA	NA	NA	NA	NA
NA	PHLPP2	NA	NA	NA	NA	NA	NA	NA	NA	NA	NA	NA	NA	NA
NA	PIGC	NA	NA	NA	NA	NA	NA	NA	NA	NA	NA	NA	NA	NA
NA	PIGW	NA	NA	NA	NA	NA	NA	NA	NA	NA	NA	NA	NA	NA
NA	PIGX	NA	NA	NA	NA	NA	NA	NA	NA	NA	NA	NA	NA	NA
NA	PIH1D2	NA	NA	NA	NA	NA	NA	NA	NA	NA	NA	NA	NA	NA
NA	PIK3R4	NA	NA	NA	NA	NA	NA	NA	NA	NA	NA	NA	NA	NA
NA	PIKFYVE	NA	NA	NA	NA	NA	NA	NA	NA	NA	NA	NA	NA	NA
NA	PIM1	NA	NA	NA	NA	NA	NA	NA	NA	NA	NA	NA	NA	NA
NA	PINX1	NA	NA	NA	NA	NA	NA	NA	NA	NA	NA	NA	NA	NA
NA	PIP4K2A	NA	NA	NA	NA	NA	NA	NA	NA	NA	NA	NA	NA	NA
NA	PITPNB	NA	NA	NA	NA	NA	NA	NA	NA	NA	NA	NA	NA	NA
NA	PITPNM2	NA	NA	NA	NA	NA	NA	NA	NA	NA	NA	NA	NA	NA
NA	PKDCC	NA	NA	NA	NA	NA	NA	NA	NA	NA	NA	NA	NA	NA
NA	PKMYT1	NA	NA	NA	NA	NA	NA	NA	NA	NA	NA	NA	NA	NA
NA	PKN3	NA	NA	NA	NA	NA	NA	NA	NA	NA	NA	NA	NA	NA
NA	PLA2G4A	NA	NA	NA	NA	NA	NA	NA	NA	NA	NA	NA	NA	NA
NA	PLAGL2	NA	NA	NA	NA	NA	NA	NA	NA	NA	NA	NA	NA	NA
NA	PLCB1	NA	NA	NA	NA	NA	NA	NA	NA	NA	NA	NA	NA	NA
NA	PLCG1	NA	NA	NA	NA	NA	NA	NA	NA	NA	NA	NA	NA	NA
NA	PLCXD1	NA	NA	NA	NA	NA	NA	NA	NA	NA	NA	NA	NA	NA
NA	PLEKHA5	NA	NA	NA	NA	NA	NA	NA	NA	NA	NA	NA	NA	NA
NA	PLEKHG4	NA	NA	NA	NA	NA	NA	NA	NA	NA	NA	NA	NA	NA
NA	PLEKHG4B	NA	NA	NA	NA	NA	NA	NA	NA	NA	NA	NA	NA	NA
NA	PLEKHO1	NA	NA	NA	NA	NA	NA	NA	NA	NA	NA	NA	NA	NA
NA	PLK1	NA	NA	NA	NA	NA	NA	NA	NA	NA	NA	NA	NA	NA
NA	PLK4	NA	NA	NA	NA	NA	NA	NA	NA	NA	NA	NA	NA	NA
NA	PLRG1	NA	NA	NA	NA	NA	NA	NA	NA	NA	NA	NA	NA	NA
NA	PLSCR1	NA	NA	NA	NA	NA	NA	NA	NA	NA	NA	NA	NA	NA
NA	PM20D2	NA	NA	NA	NA	NA	NA	NA	NA	NA	NA	NA	NA	NA
NA	PMS1	NA	NA	NA	NA	NA	NA	NA	NA	NA	NA	NA	NA	NA
NA	PNMA1	NA	NA	NA	NA	NA	NA	NA	NA	NA	NA	NA	NA	NA
NA	PNN	NA	NA	NA	NA	NA	NA	NA	NA	NA	NA	NA	NA	NA
NA	PNPT1	NA	NA	NA	NA	NA	NA	NA	NA	NA	NA	NA	NA	NA
NA	POC1A	NA	NA	NA	NA	NA	NA	NA	NA	NA	NA	NA	NA	NA
NA	POC5	NA	NA	NA	NA	NA	NA	NA	NA	NA	NA	NA	NA	NA
NA	POGK	NA	NA	NA	NA	NA	NA	NA	NA	NA	NA	NA	NA	NA
NA	POGZ	NA	NA	NA	NA	NA	NA	NA	NA	NA	NA	NA	NA	NA
NA	POLA1	NA	NA	NA	NA	NA	NA	NA	NA	NA	NA	NA	NA	NA
NA	POLA2	NA	NA	NA	NA	NA	NA	NA	NA	NA	NA	NA	NA	NA
NA	POLD1	NA	NA	NA	NA	NA	NA	NA	NA	NA	NA	NA	NA	NA
NA	POLD2	NA	NA	NA	NA	NA	NA	NA	NA	NA	NA	NA	NA	NA
NA	POLD3	NA	NA	NA	NA	NA	NA	NA	NA	NA	NA	NA	NA	NA
NA	POLDIP3	NA	NA	NA	NA	NA	NA	NA	NA	NA	NA	NA	NA	NA
NA	POLE	NA	NA	NA	NA	NA	NA	NA	NA	NA	NA	NA	NA	NA
NA	POLE2	NA	NA	NA	NA	NA	NA	NA	NA	NA	NA	NA	NA	NA
NA	POLG2	NA	NA	NA	NA	NA	NA	NA	NA	NA	NA	NA	NA	NA
NA	POLQ	NA	NA	NA	NA	NA	NA	NA	NA	NA	NA	NA	NA	NA
NA	POLR1A	NA	NA	NA	NA	NA	NA	NA	NA	NA	NA	NA	NA	NA
NA	POLR1B	NA	NA	NA	NA	NA	NA	NA	NA	NA	NA	NA	NA	NA
NA	POLR1C	NA	NA	NA	NA	NA	NA	NA	NA	NA	NA	NA	NA	NA
NA	POLR1E	NA	NA	NA	NA	NA	NA	NA	NA	NA	NA	NA	NA	NA
NA	POLR2B	NA	NA	NA	NA	NA	NA	NA	NA	NA	NA	NA	NA	NA
NA	POLR2C	NA	NA	NA	NA	NA	NA	NA	NA	NA	NA	NA	NA	NA
NA	POLR2D	NA	NA	NA	NA	NA	NA	NA	NA	NA	NA	NA	NA	NA
NA	POP1	NA	NA	NA	NA	NA	NA	NA	NA	NA	NA	NA	NA	NA
NA	POP5	NA	NA	NA	NA	NA	NA	NA	NA	NA	NA	NA	NA	NA
NA	POP7	NA	NA	NA	NA	NA	NA	NA	NA	NA	NA	NA	NA	NA
NA	POSTN	NA	NA	NA	NA	NA	NA	NA	NA	NA	NA	NA	NA	NA
NA	POT1	NA	NA	NA	NA	NA	NA	NA	NA	NA	NA	NA	NA	NA
NA	POU6F1	NA	NA	NA	NA	NA	NA	NA	NA	NA	NA	NA	NA	NA
NA	PPARD	NA	NA	NA	NA	NA	NA	NA	NA	NA	NA	NA	NA	NA
NA	PPARG	NA	NA	NA	NA	NA	NA	NA	NA	NA	NA	NA	NA	NA
NA	PPAT	NA	NA	NA	NA	NA	NA	NA	NA	NA	NA	NA	NA	NA
NA	PPID	NA	NA	NA	NA	NA	NA	NA	NA	NA	NA	NA	NA	NA
NA	PPIF	NA	NA	NA	NA	NA	NA	NA	NA	NA	NA	NA	NA	NA
NA	PPIG	NA	NA	NA	NA	NA	NA	NA	NA	NA	NA	NA	NA	NA
NA	PPIH	NA	NA	NA	NA	NA	NA	NA	NA	NA	NA	NA	NA	NA
NA	PPIL1	NA	NA	NA	NA	NA	NA	NA	NA	NA	NA	NA	NA	NA
NA	PPIL3	NA	NA	NA	NA	NA	NA	NA	NA	NA	NA	NA	NA	NA
NA	PPM1B	NA	NA	NA	NA	NA	NA	NA	NA	NA	NA	NA	NA	NA
NA	PPM1G	NA	NA	NA	NA	NA	NA	NA	NA	NA	NA	NA	NA	NA
NA	PPP1CC	NA	NA	NA	NA	NA	NA	NA	NA	NA	NA	NA	NA	NA
NA	PPP1R8	NA	NA	NA	NA	NA	NA	NA	NA	NA	NA	NA	NA	NA
NA	PPP2R3A	NA	NA	NA	NA	NA	NA	NA	NA	NA	NA	NA	NA	NA
NA	PPP2R5D	NA	NA	NA	NA	NA	NA	NA	NA	NA	NA	NA	NA	NA
NA	PPP5C	NA	NA	NA	NA	NA	NA	NA	NA	NA	NA	NA	NA	NA
NA	PPRC1	NA	NA	NA	NA	NA	NA	NA	NA	NA	NA	NA	NA	NA
NA	PPT1	NA	NA	NA	NA	NA	NA	NA	NA	NA	NA	NA	NA	NA
NA	PPWD1	NA	NA	NA	NA	NA	NA	NA	NA	NA	NA	NA	NA	NA
NA	PRC1	NA	NA	NA	NA	NA	NA	NA	NA	NA	NA	NA	NA	NA
NA	PRDM10	NA	NA	NA	NA	NA	NA	NA	NA	NA	NA	NA	NA	NA
NA	PRDM2	NA	NA	NA	NA	NA	NA	NA	NA	NA	NA	NA	NA	NA
NA	PRDM4	NA	NA	NA	NA	NA	NA	NA	NA	NA	NA	NA	NA	NA
NA	PRDM5	NA	NA	NA	NA	NA	NA	NA	NA	NA	NA	NA	NA	NA
NA	PRDM6	NA	NA	NA	NA	NA	NA	NA	NA	NA	NA	NA	NA	NA
NA	PRDM8	NA	NA	NA	NA	NA	NA	NA	NA	NA	NA	NA	NA	NA
NA	PRELID1	NA	NA	NA	NA	NA	NA	NA	NA	NA	NA	NA	NA	NA
NA	PRIM1	NA	NA	NA	NA	NA	NA	NA	NA	NA	NA	NA	NA	NA
NA	PRIM2	NA	NA	NA	NA	NA	NA	NA	NA	NA	NA	NA	NA	NA
NA	PRKAR2B	NA	NA	NA	NA	NA	NA	NA	NA	NA	NA	NA	NA	NA
NA	PRKCA	NA	NA	NA	NA	NA	NA	NA	NA	NA	NA	NA	NA	NA
NA	PRKD3	NA	NA	NA	NA	NA	NA	NA	NA	NA	NA	NA	NA	NA
NA	PRKDC	NA	NA	NA	NA	NA	NA	NA	NA	NA	NA	NA	NA	NA
NA	PRMT1	NA	NA	NA	NA	NA	NA	NA	NA	NA	NA	NA	NA	NA
NA	PRMT3	NA	NA	NA	NA	NA	NA	NA	NA	NA	NA	NA	NA	NA
NA	PRMT6	NA	NA	NA	NA	NA	NA	NA	NA	NA	NA	NA	NA	NA
NA	PRMT7	NA	NA	NA	NA	NA	NA	NA	NA	NA	NA	NA	NA	NA
NA	PRPF19	NA	NA	NA	NA	NA	NA	NA	NA	NA	NA	NA	NA	NA
NA	PRPF3	NA	NA	NA	NA	NA	NA	NA	NA	NA	NA	NA	NA	NA
NA	PRPF31	NA	NA	NA	NA	NA	NA	NA	NA	NA	NA	NA	NA	NA
NA	PRPF38A	NA	NA	NA	NA	NA	NA	NA	NA	NA	NA	NA	NA	NA
NA	PRPF38B	NA	NA	NA	NA	NA	NA	NA	NA	NA	NA	NA	NA	NA
NA	PRPF4	NA	NA	NA	NA	NA	NA	NA	NA	NA	NA	NA	NA	NA
NA	PRPF40A	NA	NA	NA	NA	NA	NA	NA	NA	NA	NA	NA	NA	NA
NA	PRPF8	NA	NA	NA	NA	NA	NA	NA	NA	NA	NA	NA	NA	NA
NA	PRPH2	NA	NA	NA	NA	NA	NA	NA	NA	NA	NA	NA	NA	NA
NA	PRPS2	NA	NA	NA	NA	NA	NA	NA	NA	NA	NA	NA	NA	NA
NA	PRR11	NA	NA	NA	NA	NA	NA	NA	NA	NA	NA	NA	NA	NA
NA	PRR12	NA	NA	NA	NA	NA	NA	NA	NA	NA	NA	NA	NA	NA
NA	PRR14	NA	NA	NA	NA	NA	NA	NA	NA	NA	NA	NA	NA	NA
NA	PRR16	NA	NA	NA	NA	NA	NA	NA	NA	NA	NA	NA	NA	NA
NA	PRR3	NA	NA	NA	NA	NA	NA	NA	NA	NA	NA	NA	NA	NA
NA	PRRT2	NA	NA	NA	NA	NA	NA	NA	NA	NA	NA	NA	NA	NA
NA	PRRX1	NA	NA	NA	NA	NA	NA	NA	NA	NA	NA	NA	NA	NA
NA	PRSS12	NA	NA	NA	NA	NA	NA	NA	NA	NA	NA	NA	NA	NA
NA	PRTFDC1	NA	NA	NA	NA	NA	NA	NA	NA	NA	NA	NA	NA	NA
NA	PRTG	NA	NA	NA	NA	NA	NA	NA	NA	NA	NA	NA	NA	NA
NA	PSD3	NA	NA	NA	NA	NA	NA	NA	NA	NA	NA	NA	NA	NA
NA	PSIP1	NA	NA	NA	NA	NA	NA	NA	NA	NA	NA	NA	NA	NA
NA	PSMA4	NA	NA	NA	NA	NA	NA	NA	NA	NA	NA	NA	NA	NA
NA	PSMC3	NA	NA	NA	NA	NA	NA	NA	NA	NA	NA	NA	NA	NA
NA	PSMC3IP	NA	NA	NA	NA	NA	NA	NA	NA	NA	NA	NA	NA	NA
NA	PSMC6	NA	NA	NA	NA	NA	NA	NA	NA	NA	NA	NA	NA	NA
NA	PSMG2	NA	NA	NA	NA	NA	NA	NA	NA	NA	NA	NA	NA	NA
NA	PSPH	NA	NA	NA	NA	NA	NA	NA	NA	NA	NA	NA	NA	NA
NA	PSRC1	NA	NA	NA	NA	NA	NA	NA	NA	NA	NA	NA	NA	NA
NA	PTBP1	NA	NA	NA	NA	NA	NA	NA	NA	NA	NA	NA	NA	NA
NA	PTBP2	NA	NA	NA	NA	NA	NA	NA	NA	NA	NA	NA	NA	NA
NA	PTCD2	NA	NA	NA	NA	NA	NA	NA	NA	NA	NA	NA	NA	NA
NA	PTCD3	NA	NA	NA	NA	NA	NA	NA	NA	NA	NA	NA	NA	NA
NA	PTCH1	NA	NA	NA	NA	NA	NA	NA	NA	NA	NA	NA	NA	NA
NA	PTCH2	NA	NA	NA	NA	NA	NA	NA	NA	NA	NA	NA	NA	NA
NA	PTER	NA	NA	NA	NA	NA	NA	NA	NA	NA	NA	NA	NA	NA
NA	PTGER2	NA	NA	NA	NA	NA	NA	NA	NA	NA	NA	NA	NA	NA
NA	PTMA	NA	NA	NA	NA	NA	NA	NA	NA	NA	NA	NA	NA	NA
NA	PTN	NA	NA	NA	NA	NA	NA	NA	NA	NA	NA	NA	NA	NA
NA	PTPN18	NA	NA	NA	NA	NA	NA	NA	NA	NA	NA	NA	NA	NA
NA	PTPN2	NA	NA	NA	NA	NA	NA	NA	NA	NA	NA	NA	NA	NA
NA	PTPRN	NA	NA	NA	NA	NA	NA	NA	NA	NA	NA	NA	NA	NA
NA	PTX3	NA	NA	NA	NA	NA	NA	NA	NA	NA	NA	NA	NA	NA
NA	PUM2	NA	NA	NA	NA	NA	NA	NA	NA	NA	NA	NA	NA	NA
NA	PUS1	NA	NA	NA	NA	NA	NA	NA	NA	NA	NA	NA	NA	NA
NA	PUS7	NA	NA	NA	NA	NA	NA	NA	NA	NA	NA	NA	NA	NA
NA	PXK	NA	NA	NA	NA	NA	NA	NA	NA	NA	NA	NA	NA	NA
NA	PXMP2	NA	NA	NA	NA	NA	NA	NA	NA	NA	NA	NA	NA	NA
NA	PXMP4	NA	NA	NA	NA	NA	NA	NA	NA	NA	NA	NA	NA	NA
NA	PYGO1	NA	NA	NA	NA	NA	NA	NA	NA	NA	NA	NA	NA	NA
NA	PYGO2	NA	NA	NA	NA	NA	NA	NA	NA	NA	NA	NA	NA	NA
NA	QRICH1	NA	NA	NA	NA	NA	NA	NA	NA	NA	NA	NA	NA	NA
NA	QRSL1	NA	NA	NA	NA	NA	NA	NA	NA	NA	NA	NA	NA	NA
NA	QSER1	NA	NA	NA	NA	NA	NA	NA	NA	NA	NA	NA	NA	NA
NA	R3HDM1	NA	NA	NA	NA	NA	NA	NA	NA	NA	NA	NA	NA	NA
NA	R3HDM2	NA	NA	NA	NA	NA	NA	NA	NA	NA	NA	NA	NA	NA
NA	RAB38	NA	NA	NA	NA	NA	NA	NA	NA	NA	NA	NA	NA	NA
NA	RAB8B	NA	NA	NA	NA	NA	NA	NA	NA	NA	NA	NA	NA	NA
NA	RABGGTB	NA	NA	NA	NA	NA	NA	NA	NA	NA	NA	NA	NA	NA
NA	RABL3	NA	NA	NA	NA	NA	NA	NA	NA	NA	NA	NA	NA	NA
NA	RACGAP1	NA	NA	NA	NA	NA	NA	NA	NA	NA	NA	NA	NA	NA
NA	RAD1	NA	NA	NA	NA	NA	NA	NA	NA	NA	NA	NA	NA	NA
NA	RAD18	NA	NA	NA	NA	NA	NA	NA	NA	NA	NA	NA	NA	NA
NA	RAD21	NA	NA	NA	NA	NA	NA	NA	NA	NA	NA	NA	NA	NA
NA	RAD23A	NA	NA	NA	NA	NA	NA	NA	NA	NA	NA	NA	NA	NA
NA	RAD51	NA	NA	NA	NA	NA	NA	NA	NA	NA	NA	NA	NA	NA
NA	RAD51AP1	NA	NA	NA	NA	NA	NA	NA	NA	NA	NA	NA	NA	NA
NA	RAD51C	NA	NA	NA	NA	NA	NA	NA	NA	NA	NA	NA	NA	NA
NA	RAD54L	NA	NA	NA	NA	NA	NA	NA	NA	NA	NA	NA	NA	NA
NA	RAE1	NA	NA	NA	NA	NA	NA	NA	NA	NA	NA	NA	NA	NA
NA	RALGAPA2	NA	NA	NA	NA	NA	NA	NA	NA	NA	NA	NA	NA	NA
NA	RALGPS2	NA	NA	NA	NA	NA	NA	NA	NA	NA	NA	NA	NA	NA
NA	RANBP1	NA	NA	NA	NA	NA	NA	NA	NA	NA	NA	NA	NA	NA
NA	RANGAP1	NA	NA	NA	NA	NA	NA	NA	NA	NA	NA	NA	NA	NA
NA	RANGRF	NA	NA	NA	NA	NA	NA	NA	NA	NA	NA	NA	NA	NA
NA	RAPGEF4	NA	NA	NA	NA	NA	NA	NA	NA	NA	NA	NA	NA	NA
NA	RAVER1	NA	NA	NA	NA	NA	NA	NA	NA	NA	NA	NA	NA	NA
NA	RBBP4	NA	NA	NA	NA	NA	NA	NA	NA	NA	NA	NA	NA	NA
NA	RBBP5	NA	NA	NA	NA	NA	NA	NA	NA	NA	NA	NA	NA	NA
NA	RBBP6	NA	NA	NA	NA	NA	NA	NA	NA	NA	NA	NA	NA	NA
NA	RBBP7	NA	NA	NA	NA	NA	NA	NA	NA	NA	NA	NA	NA	NA
NA	RBBP8	NA	NA	NA	NA	NA	NA	NA	NA	NA	NA	NA	NA	NA
NA	RBL1	NA	NA	NA	NA	NA	NA	NA	NA	NA	NA	NA	NA	NA
NA	RBM10	NA	NA	NA	NA	NA	NA	NA	NA	NA	NA	NA	NA	NA
NA	RBM12B	NA	NA	NA	NA	NA	NA	NA	NA	NA	NA	NA	NA	NA
NA	RBM14	NA	NA	NA	NA	NA	NA	NA	NA	NA	NA	NA	NA	NA
NA	RBM15	NA	NA	NA	NA	NA	NA	NA	NA	NA	NA	NA	NA	NA
NA	RBM15B	NA	NA	NA	NA	NA	NA	NA	NA	NA	NA	NA	NA	NA
NA	RBM19	NA	NA	NA	NA	NA	NA	NA	NA	NA	NA	NA	NA	NA
NA	RBM22	NA	NA	NA	NA	NA	NA	NA	NA	NA	NA	NA	NA	NA
NA	RBM23	NA	NA	NA	NA	NA	NA	NA	NA	NA	NA	NA	NA	NA
NA	RBM26	NA	NA	NA	NA	NA	NA	NA	NA	NA	NA	NA	NA	NA
NA	RBM27	NA	NA	NA	NA	NA	NA	NA	NA	NA	NA	NA	NA	NA
NA	RBM28	NA	NA	NA	NA	NA	NA	NA	NA	NA	NA	NA	NA	NA
NA	RBM33	NA	NA	NA	NA	NA	NA	NA	NA	NA	NA	NA	NA	NA
NA	RBM38	NA	NA	NA	NA	NA	NA	NA	NA	NA	NA	NA	NA	NA
NA	RBM39	NA	NA	NA	NA	NA	NA	NA	NA	NA	NA	NA	NA	NA
NA	RBM43	NA	NA	NA	NA	NA	NA	NA	NA	NA	NA	NA	NA	NA
NA	RBMS3	NA	NA	NA	NA	NA	NA	NA	NA	NA	NA	NA	NA	NA
NA	RBPMS2	NA	NA	NA	NA	NA	NA	NA	NA	NA	NA	NA	NA	NA
NA	RCC2	NA	NA	NA	NA	NA	NA	NA	NA	NA	NA	NA	NA	NA
NA	RCCD1	NA	NA	NA	NA	NA	NA	NA	NA	NA	NA	NA	NA	NA
NA	RCL1	NA	NA	NA	NA	NA	NA	NA	NA	NA	NA	NA	NA	NA
NA	RCOR2	NA	NA	NA	NA	NA	NA	NA	NA	NA	NA	NA	NA	NA
NA	RECQL4	NA	NA	NA	NA	NA	NA	NA	NA	NA	NA	NA	NA	NA
NA	REEP4	NA	NA	NA	NA	NA	NA	NA	NA	NA	NA	NA	NA	NA
NA	REL	NA	NA	NA	NA	NA	NA	NA	NA	NA	NA	NA	NA	NA
NA	RELN	NA	NA	NA	NA	NA	NA	NA	NA	NA	NA	NA	NA	NA
NA	REPIN1	NA	NA	NA	NA	NA	NA	NA	NA	NA	NA	NA	NA	NA
NA	REXO1	NA	NA	NA	NA	NA	NA	NA	NA	NA	NA	NA	NA	NA
NA	RFC1	NA	NA	NA	NA	NA	NA	NA	NA	NA	NA	NA	NA	NA
NA	RFC2	NA	NA	NA	NA	NA	NA	NA	NA	NA	NA	NA	NA	NA
NA	RFC3	NA	NA	NA	NA	NA	NA	NA	NA	NA	NA	NA	NA	NA
NA	RFC4	NA	NA	NA	NA	NA	NA	NA	NA	NA	NA	NA	NA	NA
NA	RFC5	NA	NA	NA	NA	NA	NA	NA	NA	NA	NA	NA	NA	NA
NA	RFT1	NA	NA	NA	NA	NA	NA	NA	NA	NA	NA	NA	NA	NA
NA	RFWD3	NA	NA	NA	NA	NA	NA	NA	NA	NA	NA	NA	NA	NA
NA	RFX3	NA	NA	NA	NA	NA	NA	NA	NA	NA	NA	NA	NA	NA
NA	RFXAP	NA	NA	NA	NA	NA	NA	NA	NA	NA	NA	NA	NA	NA
NA	RGS12	NA	NA	NA	NA	NA	NA	NA	NA	NA	NA	NA	NA	NA
NA	RGS17	NA	NA	NA	NA	NA	NA	NA	NA	NA	NA	NA	NA	NA
NA	RGS20	NA	NA	NA	NA	NA	NA	NA	NA	NA	NA	NA	NA	NA
NA	RHOBTB2	NA	NA	NA	NA	NA	NA	NA	NA	NA	NA	NA	NA	NA
NA	RIBC2	NA	NA	NA	NA	NA	NA	NA	NA	NA	NA	NA	NA	NA
NA	RIF1	NA	NA	NA	NA	NA	NA	NA	NA	NA	NA	NA	NA	NA
NA	RIN1	NA	NA	NA	NA	NA	NA	NA	NA	NA	NA	NA	NA	NA
NA	RIOK1	NA	NA	NA	NA	NA	NA	NA	NA	NA	NA	NA	NA	NA
NA	RMI1	NA	NA	NA	NA	NA	NA	NA	NA	NA	NA	NA	NA	NA
NA	RMND5B	NA	NA	NA	NA	NA	NA	NA	NA	NA	NA	NA	NA	NA
NA	RNASEH2A	NA	NA	NA	NA	NA	NA	NA	NA	NA	NA	NA	NA	NA
NA	RNASEH2B	NA	NA	NA	NA	NA	NA	NA	NA	NA	NA	NA	NA	NA
NA	RNF114	NA	NA	NA	NA	NA	NA	NA	NA	NA	NA	NA	NA	NA
NA	RNF138	NA	NA	NA	NA	NA	NA	NA	NA	NA	NA	NA	NA	NA
NA	RNF168	NA	NA	NA	NA	NA	NA	NA	NA	NA	NA	NA	NA	NA
NA	RNF2	NA	NA	NA	NA	NA	NA	NA	NA	NA	NA	NA	NA	NA
NA	RNF214	NA	NA	NA	NA	NA	NA	NA	NA	NA	NA	NA	NA	NA
NA	RNF219	NA	NA	NA	NA	NA	NA	NA	NA	NA	NA	NA	NA	NA
NA	RNF220	NA	NA	NA	NA	NA	NA	NA	NA	NA	NA	NA	NA	NA
NA	RNF26	NA	NA	NA	NA	NA	NA	NA	NA	NA	NA	NA	NA	NA
NA	RNF34	NA	NA	NA	NA	NA	NA	NA	NA	NA	NA	NA	NA	NA
NA	RNF40	NA	NA	NA	NA	NA	NA	NA	NA	NA	NA	NA	NA	NA
NA	RNFT2	NA	NA	NA	NA	NA	NA	NA	NA	NA	NA	NA	NA	NA
NA	RNGTT	NA	NA	NA	NA	NA	NA	NA	NA	NA	NA	NA	NA	NA
NA	ROR2	NA	NA	NA	NA	NA	NA	NA	NA	NA	NA	NA	NA	NA
NA	RPA2	NA	NA	NA	NA	NA	NA	NA	NA	NA	NA	NA	NA	NA
NA	RPA3	NA	NA	NA	NA	NA	NA	NA	NA	NA	NA	NA	NA	NA
NA	RPAP1	NA	NA	NA	NA	NA	NA	NA	NA	NA	NA	NA	NA	NA
NA	RPAP3	NA	NA	NA	NA	NA	NA	NA	NA	NA	NA	NA	NA	NA
NA	RPF2	NA	NA	NA	NA	NA	NA	NA	NA	NA	NA	NA	NA	NA
NA	RPIA	NA	NA	NA	NA	NA	NA	NA	NA	NA	NA	NA	NA	NA
NA	RPL10A	NA	NA	NA	NA	NA	NA	NA	NA	NA	NA	NA	NA	NA
NA	RPL13	NA	NA	NA	NA	NA	NA	NA	NA	NA	NA	NA	NA	NA
NA	RPL22L1	NA	NA	NA	NA	NA	NA	NA	NA	NA	NA	NA	NA	NA
NA	RPL26L1	NA	NA	NA	NA	NA	NA	NA	NA	NA	NA	NA	NA	NA
NA	RPL27A	NA	NA	NA	NA	NA	NA	NA	NA	NA	NA	NA	NA	NA
NA	RPL39L	NA	NA	NA	NA	NA	NA	NA	NA	NA	NA	NA	NA	NA
NA	RPL7L1	NA	NA	NA	NA	NA	NA	NA	NA	NA	NA	NA	NA	NA
NA	RPP14	NA	NA	NA	NA	NA	NA	NA	NA	NA	NA	NA	NA	NA
NA	RPP25	NA	NA	NA	NA	NA	NA	NA	NA	NA	NA	NA	NA	NA
NA	RPP30	NA	NA	NA	NA	NA	NA	NA	NA	NA	NA	NA	NA	NA
NA	RPS15	NA	NA	NA	NA	NA	NA	NA	NA	NA	NA	NA	NA	NA
NA	RPS25	NA	NA	NA	NA	NA	NA	NA	NA	NA	NA	NA	NA	NA
NA	RPS3A	NA	NA	NA	NA	NA	NA	NA	NA	NA	NA	NA	NA	NA
NA	RPS4X	NA	NA	NA	NA	NA	NA	NA	NA	NA	NA	NA	NA	NA
NA	RPS6KA1	NA	NA	NA	NA	NA	NA	NA	NA	NA	NA	NA	NA	NA
NA	RPS6KA5	NA	NA	NA	NA	NA	NA	NA	NA	NA	NA	NA	NA	NA
NA	RPS7	NA	NA	NA	NA	NA	NA	NA	NA	NA	NA	NA	NA	NA
NA	RPS9	NA	NA	NA	NA	NA	NA	NA	NA	NA	NA	NA	NA	NA
NA	RPTOR	NA	NA	NA	NA	NA	NA	NA	NA	NA	NA	NA	NA	NA
NA	RPUSD4	NA	NA	NA	NA	NA	NA	NA	NA	NA	NA	NA	NA	NA
NA	RRM1	NA	NA	NA	NA	NA	NA	NA	NA	NA	NA	NA	NA	NA
NA	RRM2	NA	NA	NA	NA	NA	NA	NA	NA	NA	NA	NA	NA	NA
NA	RRP1	NA	NA	NA	NA	NA	NA	NA	NA	NA	NA	NA	NA	NA
NA	RRP15	NA	NA	NA	NA	NA	NA	NA	NA	NA	NA	NA	NA	NA
NA	RRP1B	NA	NA	NA	NA	NA	NA	NA	NA	NA	NA	NA	NA	NA
NA	RRP36	NA	NA	NA	NA	NA	NA	NA	NA	NA	NA	NA	NA	NA
NA	RRP7A	NA	NA	NA	NA	NA	NA	NA	NA	NA	NA	NA	NA	NA
NA	RRP8	NA	NA	NA	NA	NA	NA	NA	NA	NA	NA	NA	NA	NA
NA	RRP9	NA	NA	NA	NA	NA	NA	NA	NA	NA	NA	NA	NA	NA
NA	RSBN1L	NA	NA	NA	NA	NA	NA	NA	NA	NA	NA	NA	NA	NA
NA	RSL1D1	NA	NA	NA	NA	NA	NA	NA	NA	NA	NA	NA	NA	NA
NA	RSL24D1	NA	NA	NA	NA	NA	NA	NA	NA	NA	NA	NA	NA	NA
NA	RSRC1	NA	NA	NA	NA	NA	NA	NA	NA	NA	NA	NA	NA	NA
NA	RSRC2	NA	NA	NA	NA	NA	NA	NA	NA	NA	NA	NA	NA	NA
NA	RTF1	NA	NA	NA	NA	NA	NA	NA	NA	NA	NA	NA	NA	NA
NA	RTKN2	NA	NA	NA	NA	NA	NA	NA	NA	NA	NA	NA	NA	NA
NA	RTN4IP1	NA	NA	NA	NA	NA	NA	NA	NA	NA	NA	NA	NA	NA
NA	RTTN	NA	NA	NA	NA	NA	NA	NA	NA	NA	NA	NA	NA	NA
NA	RUNX1T1	NA	NA	NA	NA	NA	NA	NA	NA	NA	NA	NA	NA	NA
NA	RUNX2	NA	NA	NA	NA	NA	NA	NA	NA	NA	NA	NA	NA	NA
NA	RUVBL1	NA	NA	NA	NA	NA	NA	NA	NA	NA	NA	NA	NA	NA
NA	RUVBL2	NA	NA	NA	NA	NA	NA	NA	NA	NA	NA	NA	NA	NA
NA	RXRA	NA	NA	NA	NA	NA	NA	NA	NA	NA	NA	NA	NA	NA
NA	S100A3	NA	NA	NA	NA	NA	NA	NA	NA	NA	NA	NA	NA	NA
NA	SAAL1	NA	NA	NA	NA	NA	NA	NA	NA	NA	NA	NA	NA	NA
NA	SACS	NA	NA	NA	NA	NA	NA	NA	NA	NA	NA	NA	NA	NA
NA	SAE1	NA	NA	NA	NA	NA	NA	NA	NA	NA	NA	NA	NA	NA
NA	SAFB	NA	NA	NA	NA	NA	NA	NA	NA	NA	NA	NA	NA	NA
NA	SALL2	NA	NA	NA	NA	NA	NA	NA	NA	NA	NA	NA	NA	NA
NA	SAMHD1	NA	NA	NA	NA	NA	NA	NA	NA	NA	NA	NA	NA	NA
NA	SAP130	NA	NA	NA	NA	NA	NA	NA	NA	NA	NA	NA	NA	NA
NA	SARS2	NA	NA	NA	NA	NA	NA	NA	NA	NA	NA	NA	NA	NA
NA	SART1	NA	NA	NA	NA	NA	NA	NA	NA	NA	NA	NA	NA	NA
NA	SART3	NA	NA	NA	NA	NA	NA	NA	NA	NA	NA	NA	NA	NA
NA	SASS6	NA	NA	NA	NA	NA	NA	NA	NA	NA	NA	NA	NA	NA
NA	SBF2	NA	NA	NA	NA	NA	NA	NA	NA	NA	NA	NA	NA	NA
NA	SCAI	NA	NA	NA	NA	NA	NA	NA	NA	NA	NA	NA	NA	NA
NA	SCARA3	NA	NA	NA	NA	NA	NA	NA	NA	NA	NA	NA	NA	NA
NA	SCARNA10	NA	NA	NA	NA	NA	NA	NA	NA	NA	NA	NA	NA	NA
NA	SCARNA9L	NA	NA	NA	NA	NA	NA	NA	NA	NA	NA	NA	NA	NA
NA	SCD	NA	NA	NA	NA	NA	NA	NA	NA	NA	NA	NA	NA	NA
NA	SCLT1	NA	NA	NA	NA	NA	NA	NA	NA	NA	NA	NA	NA	NA
NA	SCMH1	NA	NA	NA	NA	NA	NA	NA	NA	NA	NA	NA	NA	NA
NA	SCML1	NA	NA	NA	NA	NA	NA	NA	NA	NA	NA	NA	NA	NA
NA	SCML2	NA	NA	NA	NA	NA	NA	NA	NA	NA	NA	NA	NA	NA
NA	SDC1	NA	NA	NA	NA	NA	NA	NA	NA	NA	NA	NA	NA	NA
NA	SECISBP2	NA	NA	NA	NA	NA	NA	NA	NA	NA	NA	NA	NA	NA
NA	SEH1L	NA	NA	NA	NA	NA	NA	NA	NA	NA	NA	NA	NA	NA
NA	SELENBP1	NA	NA	NA	NA	NA	NA	NA	NA	NA	NA	NA	NA	NA
NA	SEMA3A	NA	NA	NA	NA	NA	NA	NA	NA	NA	NA	NA	NA	NA
NA	SEMA3D	NA	NA	NA	NA	NA	NA	NA	NA	NA	NA	NA	NA	NA
NA	SEMA4C	NA	NA	NA	NA	NA	NA	NA	NA	NA	NA	NA	NA	NA
NA	SEMA4D	NA	NA	NA	NA	NA	NA	NA	NA	NA	NA	NA	NA	NA
NA	SENP1	NA	NA	NA	NA	NA	NA	NA	NA	NA	NA	NA	NA	NA
NA	SENP7	NA	NA	NA	NA	NA	NA	NA	NA	NA	NA	NA	NA	NA
NA	SEPHS1	NA	NA	NA	NA	NA	NA	NA	NA	NA	NA	NA	NA	NA
NA	SEPSECS	NA	NA	NA	NA	NA	NA	NA	NA	NA	NA	NA	NA	NA
NA	SERP2	NA	NA	NA	NA	NA	NA	NA	NA	NA	NA	NA	NA	NA
NA	SESTD1	NA	NA	NA	NA	NA	NA	NA	NA	NA	NA	NA	NA	NA
NA	SET	NA	NA	NA	NA	NA	NA	NA	NA	NA	NA	NA	NA	NA
NA	SETD1A	NA	NA	NA	NA	NA	NA	NA	NA	NA	NA	NA	NA	NA
NA	SETD1B	NA	NA	NA	NA	NA	NA	NA	NA	NA	NA	NA	NA	NA
NA	SETD2	NA	NA	NA	NA	NA	NA	NA	NA	NA	NA	NA	NA	NA
NA	SETDB1	NA	NA	NA	NA	NA	NA	NA	NA	NA	NA	NA	NA	NA
NA	SETDB2	NA	NA	NA	NA	NA	NA	NA	NA	NA	NA	NA	NA	NA
NA	SETMAR	NA	NA	NA	NA	NA	NA	NA	NA	NA	NA	NA	NA	NA
NA	SF1	NA	NA	NA	NA	NA	NA	NA	NA	NA	NA	NA	NA	NA
NA	SF3A1	NA	NA	NA	NA	NA	NA	NA	NA	NA	NA	NA	NA	NA
NA	SF3A2	NA	NA	NA	NA	NA	NA	NA	NA	NA	NA	NA	NA	NA
NA	SF3A3	NA	NA	NA	NA	NA	NA	NA	NA	NA	NA	NA	NA	NA
NA	SF3B2	NA	NA	NA	NA	NA	NA	NA	NA	NA	NA	NA	NA	NA
NA	SF3B3	NA	NA	NA	NA	NA	NA	NA	NA	NA	NA	NA	NA	NA
NA	SF3B4	NA	NA	NA	NA	NA	NA	NA	NA	NA	NA	NA	NA	NA
NA	SFMBT1	NA	NA	NA	NA	NA	NA	NA	NA	NA	NA	NA	NA	NA
NA	SFMBT2	NA	NA	NA	NA	NA	NA	NA	NA	NA	NA	NA	NA	NA
NA	SFPQ	NA	NA	NA	NA	NA	NA	NA	NA	NA	NA	NA	NA	NA
NA	SFSWAP	NA	NA	NA	NA	NA	NA	NA	NA	NA	NA	NA	NA	NA
NA	SFXN2	NA	NA	NA	NA	NA	NA	NA	NA	NA	NA	NA	NA	NA
NA	SFXN4	NA	NA	NA	NA	NA	NA	NA	NA	NA	NA	NA	NA	NA
NA	SFXN5	NA	NA	NA	NA	NA	NA	NA	NA	NA	NA	NA	NA	NA
NA	SGK494	NA	NA	NA	NA	NA	NA	NA	NA	NA	NA	NA	NA	NA
NA	SHCBP1	NA	NA	NA	NA	NA	NA	NA	NA	NA	NA	NA	NA	NA
NA	SHMT1	NA	NA	NA	NA	NA	NA	NA	NA	NA	NA	NA	NA	NA
NA	SHMT2	NA	NA	NA	NA	NA	NA	NA	NA	NA	NA	NA	NA	NA
NA	SHPRH	NA	NA	NA	NA	NA	NA	NA	NA	NA	NA	NA	NA	NA
NA	SHQ1	NA	NA	NA	NA	NA	NA	NA	NA	NA	NA	NA	NA	NA
NA	SIK2	NA	NA	NA	NA	NA	NA	NA	NA	NA	NA	NA	NA	NA
NA	SIN3A	NA	NA	NA	NA	NA	NA	NA	NA	NA	NA	NA	NA	NA
NA	SIPA1L2	NA	NA	NA	NA	NA	NA	NA	NA	NA	NA	NA	NA	NA
NA	SIRT1	NA	NA	NA	NA	NA	NA	NA	NA	NA	NA	NA	NA	NA
NA	SIVA1	NA	NA	NA	NA	NA	NA	NA	NA	NA	NA	NA	NA	NA
NA	SKA1	NA	NA	NA	NA	NA	NA	NA	NA	NA	NA	NA	NA	NA
NA	SKA2	NA	NA	NA	NA	NA	NA	NA	NA	NA	NA	NA	NA	NA
NA	SKA3	NA	NA	NA	NA	NA	NA	NA	NA	NA	NA	NA	NA	NA
NA	SKP2	NA	NA	NA	NA	NA	NA	NA	NA	NA	NA	NA	NA	NA
NA	SLBP	NA	NA	NA	NA	NA	NA	NA	NA	NA	NA	NA	NA	NA
NA	SLC12A7	NA	NA	NA	NA	NA	NA	NA	NA	NA	NA	NA	NA	NA
NA	SLC16A7	NA	NA	NA	NA	NA	NA	NA	NA	NA	NA	NA	NA	NA
NA	SLC17A9	NA	NA	NA	NA	NA	NA	NA	NA	NA	NA	NA	NA	NA
NA	SLC19A1	NA	NA	NA	NA	NA	NA	NA	NA	NA	NA	NA	NA	NA
NA	SLC25A10	NA	NA	NA	NA	NA	NA	NA	NA	NA	NA	NA	NA	NA
NA	SLC25A13	NA	NA	NA	NA	NA	NA	NA	NA	NA	NA	NA	NA	NA
NA	SLC25A15	NA	NA	NA	NA	NA	NA	NA	NA	NA	NA	NA	NA	NA
NA	SLC25A17	NA	NA	NA	NA	NA	NA	NA	NA	NA	NA	NA	NA	NA
NA	SLC25A19	NA	NA	NA	NA	NA	NA	NA	NA	NA	NA	NA	NA	NA
NA	SLC25A33	NA	NA	NA	NA	NA	NA	NA	NA	NA	NA	NA	NA	NA
NA	SLC25A35	NA	NA	NA	NA	NA	NA	NA	NA	NA	NA	NA	NA	NA
NA	SLC25A40	NA	NA	NA	NA	NA	NA	NA	NA	NA	NA	NA	NA	NA
NA	SLC25A5	NA	NA	NA	NA	NA	NA	NA	NA	NA	NA	NA	NA	NA
NA	SLC29A1	NA	NA	NA	NA	NA	NA	NA	NA	NA	NA	NA	NA	NA
NA	SLC2A4RG	NA	NA	NA	NA	NA	NA	NA	NA	NA	NA	NA	NA	NA
NA	SLC35D1	NA	NA	NA	NA	NA	NA	NA	NA	NA	NA	NA	NA	NA
NA	SLC36A4	NA	NA	NA	NA	NA	NA	NA	NA	NA	NA	NA	NA	NA
NA	SLC37A4	NA	NA	NA	NA	NA	NA	NA	NA	NA	NA	NA	NA	NA
NA	SLC38A4	NA	NA	NA	NA	NA	NA	NA	NA	NA	NA	NA	NA	NA
NA	SLC44A1	NA	NA	NA	NA	NA	NA	NA	NA	NA	NA	NA	NA	NA
NA	SLC4A7	NA	NA	NA	NA	NA	NA	NA	NA	NA	NA	NA	NA	NA
NA	SLC4A8	NA	NA	NA	NA	NA	NA	NA	NA	NA	NA	NA	NA	NA
NA	SLC5A6	NA	NA	NA	NA	NA	NA	NA	NA	NA	NA	NA	NA	NA
NA	SLC7A1	NA	NA	NA	NA	NA	NA	NA	NA	NA	NA	NA	NA	NA
NA	SLC7A11	NA	NA	NA	NA	NA	NA	NA	NA	NA	NA	NA	NA	NA
NA	SLC7A14	NA	NA	NA	NA	NA	NA	NA	NA	NA	NA	NA	NA	NA
NA	SLC7A2	NA	NA	NA	NA	NA	NA	NA	NA	NA	NA	NA	NA	NA
NA	SLC7A6OS	NA	NA	NA	NA	NA	NA	NA	NA	NA	NA	NA	NA	NA
NA	SLC9A9	NA	NA	NA	NA	NA	NA	NA	NA	NA	NA	NA	NA	NA
NA	SLCO3A1	NA	NA	NA	NA	NA	NA	NA	NA	NA	NA	NA	NA	NA
NA	SLFN11	NA	NA	NA	NA	NA	NA	NA	NA	NA	NA	NA	NA	NA
NA	SLFN12L	NA	NA	NA	NA	NA	NA	NA	NA	NA	NA	NA	NA	NA
NA	SLFN13	NA	NA	NA	NA	NA	NA	NA	NA	NA	NA	NA	NA	NA
NA	SLIT2	NA	NA	NA	NA	NA	NA	NA	NA	NA	NA	NA	NA	NA
NA	SLX4	NA	NA	NA	NA	NA	NA	NA	NA	NA	NA	NA	NA	NA
NA	SMAD1	NA	NA	NA	NA	NA	NA	NA	NA	NA	NA	NA	NA	NA
NA	SMAD4	NA	NA	NA	NA	NA	NA	NA	NA	NA	NA	NA	NA	NA
NA	SMAD6	NA	NA	NA	NA	NA	NA	NA	NA	NA	NA	NA	NA	NA
NA	SMAD9	NA	NA	NA	NA	NA	NA	NA	NA	NA	NA	NA	NA	NA
NA	SMAP2	NA	NA	NA	NA	NA	NA	NA	NA	NA	NA	NA	NA	NA
NA	SMARCA2	NA	NA	NA	NA	NA	NA	NA	NA	NA	NA	NA	NA	NA
NA	SMARCA4	NA	NA	NA	NA	NA	NA	NA	NA	NA	NA	NA	NA	NA
NA	SMARCA5	NA	NA	NA	NA	NA	NA	NA	NA	NA	NA	NA	NA	NA
NA	SMARCAD1	NA	NA	NA	NA	NA	NA	NA	NA	NA	NA	NA	NA	NA
NA	SMARCB1	NA	NA	NA	NA	NA	NA	NA	NA	NA	NA	NA	NA	NA
NA	SMARCC1	NA	NA	NA	NA	NA	NA	NA	NA	NA	NA	NA	NA	NA
NA	SMARCC2	NA	NA	NA	NA	NA	NA	NA	NA	NA	NA	NA	NA	NA
NA	SMARCD1	NA	NA	NA	NA	NA	NA	NA	NA	NA	NA	NA	NA	NA
NA	SMARCE1	NA	NA	NA	NA	NA	NA	NA	NA	NA	NA	NA	NA	NA
NA	SMC1A	NA	NA	NA	NA	NA	NA	NA	NA	NA	NA	NA	NA	NA
NA	SMC2	NA	NA	NA	NA	NA	NA	NA	NA	NA	NA	NA	NA	NA
NA	SMC3	NA	NA	NA	NA	NA	NA	NA	NA	NA	NA	NA	NA	NA
NA	SMC4	NA	NA	NA	NA	NA	NA	NA	NA	NA	NA	NA	NA	NA
NA	SMCHD1	NA	NA	NA	NA	NA	NA	NA	NA	NA	NA	NA	NA	NA
NA	SMNDC1	NA	NA	NA	NA	NA	NA	NA	NA	NA	NA	NA	NA	NA
NA	SMO	NA	NA	NA	NA	NA	NA	NA	NA	NA	NA	NA	NA	NA
NA	SMPD2	NA	NA	NA	NA	NA	NA	NA	NA	NA	NA	NA	NA	NA
NA	SMPD4	NA	NA	NA	NA	NA	NA	NA	NA	NA	NA	NA	NA	NA
NA	SMS	NA	NA	NA	NA	NA	NA	NA	NA	NA	NA	NA	NA	NA
NA	SMU1	NA	NA	NA	NA	NA	NA	NA	NA	NA	NA	NA	NA	NA
NA	SMYD4	NA	NA	NA	NA	NA	NA	NA	NA	NA	NA	NA	NA	NA
NA	SMYD5	NA	NA	NA	NA	NA	NA	NA	NA	NA	NA	NA	NA	NA
NA	SNAI1	NA	NA	NA	NA	NA	NA	NA	NA	NA	NA	NA	NA	NA
NA	SNCAIP	NA	NA	NA	NA	NA	NA	NA	NA	NA	NA	NA	NA	NA
NA	SNORA16B	NA	NA	NA	NA	NA	NA	NA	NA	NA	NA	NA	NA	NA
NA	SNORA58	NA	NA	NA	NA	NA	NA	NA	NA	NA	NA	NA	NA	NA
NA	SNORA71C	NA	NA	NA	NA	NA	NA	NA	NA	NA	NA	NA	NA	NA
NA	SNORA74A	NA	NA	NA	NA	NA	NA	NA	NA	NA	NA	NA	NA	NA
NA	SNORD15A	NA	NA	NA	NA	NA	NA	NA	NA	NA	NA	NA	NA	NA
NA	SNRNP200	NA	NA	NA	NA	NA	NA	NA	NA	NA	NA	NA	NA	NA
NA	SNRNP40	NA	NA	NA	NA	NA	NA	NA	NA	NA	NA	NA	NA	NA
NA	SNRNP48	NA	NA	NA	NA	NA	NA	NA	NA	NA	NA	NA	NA	NA
NA	SNRPA	NA	NA	NA	NA	NA	NA	NA	NA	NA	NA	NA	NA	NA
NA	SNRPB2	NA	NA	NA	NA	NA	NA	NA	NA	NA	NA	NA	NA	NA
NA	SNRPC	NA	NA	NA	NA	NA	NA	NA	NA	NA	NA	NA	NA	NA
NA	SNRPD1	NA	NA	NA	NA	NA	NA	NA	NA	NA	NA	NA	NA	NA
NA	SNRPD3	NA	NA	NA	NA	NA	NA	NA	NA	NA	NA	NA	NA	NA
NA	SNRPE	NA	NA	NA	NA	NA	NA	NA	NA	NA	NA	NA	NA	NA
NA	SNRPF	NA	NA	NA	NA	NA	NA	NA	NA	NA	NA	NA	NA	NA
NA	SNRPG	NA	NA	NA	NA	NA	NA	NA	NA	NA	NA	NA	NA	NA
NA	SNW1	NA	NA	NA	NA	NA	NA	NA	NA	NA	NA	NA	NA	NA
NA	SNX5	NA	NA	NA	NA	NA	NA	NA	NA	NA	NA	NA	NA	NA
NA	SOCS1	NA	NA	NA	NA	NA	NA	NA	NA	NA	NA	NA	NA	NA
NA	SOCS2	NA	NA	NA	NA	NA	NA	NA	NA	NA	NA	NA	NA	NA
NA	SOCS3	NA	NA	NA	NA	NA	NA	NA	NA	NA	NA	NA	NA	NA
NA	SOCS6	NA	NA	NA	NA	NA	NA	NA	NA	NA	NA	NA	NA	NA
NA	SORD	NA	NA	NA	NA	NA	NA	NA	NA	NA	NA	NA	NA	NA
NA	SORL1	NA	NA	NA	NA	NA	NA	NA	NA	NA	NA	NA	NA	NA
NA	SOX11	NA	NA	NA	NA	NA	NA	NA	NA	NA	NA	NA	NA	NA
NA	SP1	NA	NA	NA	NA	NA	NA	NA	NA	NA	NA	NA	NA	NA
NA	SP2	NA	NA	NA	NA	NA	NA	NA	NA	NA	NA	NA	NA	NA
[truncated: 522 more rows]

## Sheet: GSE59861_6h_GSE55118
X1_sets_GSE55118_middle_vs_young	X1_sets_GSE55118_old_vs_young	X1_sets_GSE59861_6h_2Gy	X1_sets_GSE59861_6h_5cGy	X2_sets_GSE55118_middle_vs_young_GSE55118_old_vs_young	X2_sets_GSE55118_middle_vs_young_GSE59861_6h_2Gy	X2_sets_GSE55118_middle_vs_young_GSE59861_6h_5cGy	X2_sets_GSE55118_old_vs_young_GSE59861_6h_2Gy	X2_sets_GSE55118_old_vs_young_GSE59861_6h_5cGy	X2_sets_GSE59861_6h_2Gy_GSE59861_6h_5cGy	X3_sets_GSE55118_middle_vs_young_GSE55118_old_vs_young_GSE59861_6h_2Gy	X3_sets_GSE55118_middle_vs_young_GSE55118_old_vs_young_GSE59861_6h_5cGy	X3_sets_GSE55118_middle_vs_young_GSE59861_6h_2Gy_GSE59861_6h_5cGy	X3_sets_GSE55118_old_vs_young_GSE59861_6h_2Gy_GSE59861_6h_5cGy	X4_sets_GSE55118_middle_vs_young_GSE55118_old_vs_young_GSE59861_6h_2Gy_GSE59861_6h_5cGy
AACS	ABL2	ABCB4	ABCE1	AGER	NA	EPB41L2	COX15	GMPPA	ACADSB	NA	NA	NA	NA	NA
ABCD1	ACD	ACADSB	ABI1	ARHGAP6	NA	HPS1	NA	NA	BHLHE40	NA	NA	NA	NA	NA
ABHD4	ADAMTS1	ARHGAP26	ACADSB	BANP	NA	OGFOD2	NA	NA	CHST11	NA	NA	NA	NA	NA
ABLIM1	AGER	ARHGAP29	ACER1	BCKDHA	NA	ZFHX2	NA	NA	CTH	NA	NA	NA	NA	NA
ACACA	AMOTL1	ARRB2	ALDH1L1	C11ORF86	NA	NA	NA	NA	DDX3X	NA	NA	NA	NA	NA
ACAD10	ANKLE2	BCOR	ALPK3	C7ORF61	NA	NA	NA	NA	DLG1	NA	NA	NA	NA	NA
ACBD4	ANKRD46	BHLHE40	ARNTL	CDHR5	NA	NA	NA	NA	DUSP2	NA	NA	NA	NA	NA
ACSF3	APLP1	CACNA2D3	BHLHE40	CYP2E1	NA	NA	NA	NA	NEDD9	NA	NA	NA	NA	NA
ADAM19	ARHGAP23	CDC25A	BIRC3	EFHC2	NA	NA	NA	NA	RGS16	NA	NA	NA	NA	NA
ADAMTS5	ARHGAP6	CDCA7	BRCC3	FOXP3	NA	NA	NA	NA	SENP1	NA	NA	NA	NA	NA
ADAR	B9D1	CDH11	C15ORF32	GRIPAP1	NA	NA	NA	NA	SNAP23	NA	NA	NA	NA	NA
ADD1	BANP	CDK5R1	C9ORF64	GUCA1B	NA	NA	NA	NA	ST6GAL1	NA	NA	NA	NA	NA
ADHFE1	BCKDHA	CDT1	CAB39	INPP4B	NA	NA	NA	NA	TCF7L2	NA	NA	NA	NA	NA
AEBP1	C11ORF86	CHRNA10	CCDC24	KCTD13	NA	NA	NA	NA	TTC9	NA	NA	NA	NA	NA
AGA	C22ORF24	CHST11	CD7	LDB2	NA	NA	NA	NA	TXNRD1	NA	NA	NA	NA	NA
AGER	C2CD4C	COX15	CDC16	LYPD4	NA	NA	NA	NA	ZNF470	NA	NA	NA	NA	NA
AHNAK2	C2ORF70	CTH	CHST11	MAMSTR	NA	NA	NA	NA	NA	NA	NA	NA	NA	NA
AKAP12	C4BPB	DDX3X	CHSY1	MPPED1	NA	NA	NA	NA	NA	NA	NA	NA	NA	NA
ALG1L	C7ORF61	DLG1	CLASP2	MUC7	NA	NA	NA	NA	NA	NA	NA	NA	NA	NA
ALOX5AP	CABP4	DLG3	CTH	NPLOC4	NA	NA	NA	NA	NA	NA	NA	NA	NA	NA
AMPD2	CALCA	DLX1	CYTH2	NR2E3	NA	NA	NA	NA	NA	NA	NA	NA	NA	NA
ANAPC13	CCDC27	DUSP2	DDX3X	OR4K14	NA	NA	NA	NA	NA	NA	NA	NA	NA	NA
ANKRD13B	CDA	EIF4G1	DEPDC1	OR56A1	NA	NA	NA	NA	NA	NA	NA	NA	NA	NA
AP2A2	CDHR5	ERCC3	DHX40	OR5L1	NA	NA	NA	NA	NA	NA	NA	NA	NA	NA
AP4M1	CENPO	ERRFI1	DLG1	OR6Q1	NA	NA	NA	NA	NA	NA	NA	NA	NA	NA
APLNR	CHGB	FAM50B	DNAJB6	PDGFB	NA	NA	NA	NA	NA	NA	NA	NA	NA	NA
APOBEC3C	COX15	FANCE	DNAJC9	POLR2F	NA	NA	NA	NA	NA	NA	NA	NA	NA	NA
APOBEC3F	CPLX2	FANCL	DUSP1	PRKAR1B	NA	NA	NA	NA	NA	NA	NA	NA	NA	NA
AQP3	CSNK1G2	FIBIN	DUSP2	SLFNL1	NA	NA	NA	NA	NA	NA	NA	NA	NA	NA
ARAP1	CYP2E1	FKBP15	EFR3A	TBC1D10C	NA	NA	NA	NA	NA	NA	NA	NA	NA	NA
ARHGAP1	DET1	GATA2	EGR1	TEX13A	NA	NA	NA	NA	NA	NA	NA	NA	NA	NA
ARHGAP28	DHDH	GLI2	EHBP1	TMC6	NA	NA	NA	NA	NA	NA	NA	NA	NA	NA
ARHGAP6	DOT1L	GPR161	EPB41L2	TP53INP2	NA	NA	NA	NA	NA	NA	NA	NA	NA	NA
ARHGEF4	DRD5	GPT2	EPS8	TRPM6	NA	NA	NA	NA	NA	NA	NA	NA	NA	NA
ARMCX2	EFHC2	HINT3	FCRL1	TRPM8	NA	NA	NA	NA	NA	NA	NA	NA	NA	NA
ARRB1	EFNA5	HMGB1	FOS	VASH2	NA	NA	NA	NA	NA	NA	NA	NA	NA	NA
ARSE	EPB42	HTR5A	FRYL	VSX1	NA	NA	NA	NA	NA	NA	NA	NA	NA	NA
ASTN2	FARP1	ING5	G3BP1	ZBTB48	NA	NA	NA	NA	NA	NA	NA	NA	NA	NA
ATG2A	FAT4	KDM4A	GALNT5	ZFAT	NA	NA	NA	NA	NA	NA	NA	NA	NA	NA
ATP6AP1L	FGA	KLF11	GMPPA	ZMAT4	NA	NA	NA	NA	NA	NA	NA	NA	NA	NA
BAIAP2	FGF6	MAPK14	GOLPH3	ZNF711	NA	NA	NA	NA	NA	NA	NA	NA	NA	NA
BANP	FGFR1	METTL2B	HPS1	ZNFX1	NA	NA	NA	NA	NA	NA	NA	NA	NA	NA
BBS4	FLCN	METTL3	HSPA5	NA	NA	NA	NA	NA	NA	NA	NA	NA	NA	NA
BBS5	FLG	MIS12	HSPA8	NA	NA	NA	NA	NA	NA	NA	NA	NA	NA	NA
BBS9	FLNA	MOCOS	HSPD1	NA	NA	NA	NA	NA	NA	NA	NA	NA	NA	NA
BCAS3	FOXP3	MSH6	IGF1	NA	NA	NA	NA	NA	NA	NA	NA	NA	NA	NA
BCKDHA	FUT3	MTHFD2L	INPP5A	NA	NA	NA	NA	NA	NA	NA	NA	NA	NA	NA
BCO2	FXYD3	MTMR4	IQSEC2	NA	NA	NA	NA	NA	NA	NA	NA	NA	NA	NA
BNC2	GABRA5	NAV1	MAGI2	NA	NA	NA	NA	NA	NA	NA	NA	NA	NA	NA
BPNT1	GABRQ	NECAP1	MRPS27	NA	NA	NA	NA	NA	NA	NA	NA	NA	NA	NA
BRF2	GH1	NEDD9	NEDD9	NA	NA	NA	NA	NA	NA	NA	NA	NA	NA	NA
BSX	GMPPA	NFIC	NR1D2	NA	NA	NA	NA	NA	NA	NA	NA	NA	NA	NA
BTBD2	GRIP2	NHSL1	OGFOD2	NA	NA	NA	NA	NA	NA	NA	NA	NA	NA	NA
C11ORF86	GRIPAP1	NRG3	OR10C1	NA	NA	NA	NA	NA	NA	NA	NA	NA	NA	NA
C1QTNF6	GUCA1B	NTM	PAPSS1	NA	NA	NA	NA	NA	NA	NA	NA	NA	NA	NA
C7ORF61	IL2RG	NUDT16P1	PAX3	NA	NA	NA	NA	NA	NA	NA	NA	NA	NA	NA
C8ORF31	INO80E	PPM1B	PDE4DIP	NA	NA	NA	NA	NA	NA	NA	NA	NA	NA	NA
CANT1	INPP4B	PRPSAP2	PHEX	NA	NA	NA	NA	NA	NA	NA	NA	NA	NA	NA
CC2D1A	INSC	PTER	PICALM	NA	NA	NA	NA	NA	NA	NA	NA	NA	NA	NA
CC2D2A	ITGA3	RAB36	PLVAP	NA	NA	NA	NA	NA	NA	NA	NA	NA	NA	NA
CCDC22	ITGA5	RASL11B	RAB6A	NA	NA	NA	NA	NA	NA	NA	NA	NA	NA	NA
CCDC65	IYD	RBFOX3	RAPGEF2	NA	NA	NA	NA	NA	NA	NA	NA	NA	NA	NA
CCDC8	KCNJ9	RBM22	RASSF10	NA	NA	NA	NA	NA	NA	NA	NA	NA	NA	NA
CD276	KCTD13	RERE	RBM5	NA	NA	NA	NA	NA	NA	NA	NA	NA	NA	NA
CD52	KLHDC10	RFWD3	RGS16	NA	NA	NA	NA	NA	NA	NA	NA	NA	NA	NA
CDH18	LDB2	RGS12	RINL	NA	NA	NA	NA	NA	NA	NA	NA	NA	NA	NA
CDHR5	LIPH	RGS16	RSRC2	NA	NA	NA	NA	NA	NA	NA	NA	NA	NA	NA
CDKN2B	LMF1	S1PR1	SCMH1	NA	NA	NA	NA	NA	NA	NA	NA	NA	NA	NA
CEMP1	LMOD2	SENP1	SEC24C	NA	NA	NA	NA	NA	NA	NA	NA	NA	NA	NA
CHD3	LYPD4	SH3KBP1	SENP1	NA	NA	NA	NA	NA	NA	NA	NA	NA	NA	NA
CLCN2	MAMSTR	SKI	SGK1	NA	NA	NA	NA	NA	NA	NA	NA	NA	NA	NA
CLSTN3	MAP2	SLC38A2	SLC12A6	NA	NA	NA	NA	NA	NA	NA	NA	NA	NA	NA
CMA1	MASP1	SNAP23	SLC16A1	NA	NA	NA	NA	NA	NA	NA	NA	NA	NA	NA
COG4	MCF2L	SORBS2	SNAP23	NA	NA	NA	NA	NA	NA	NA	NA	NA	NA	NA
CREB3L3	MIER2	SPCS1	SNIP1	NA	NA	NA	NA	NA	NA	NA	NA	NA	NA	NA
CSAD	MMP19	ST6GAL1	ST6GAL1	NA	NA	NA	NA	NA	NA	NA	NA	NA	NA	NA
CUL7	MPPED1	SUN1	STIP1	NA	NA	NA	NA	NA	NA	NA	NA	NA	NA	NA
CYB5D2	MRAP2	SYBU	STRADA	NA	NA	NA	NA	NA	NA	NA	NA	NA	NA	NA
CYB5R3	MUC7	TBL1X	TAB2	NA	NA	NA	NA	NA	NA	NA	NA	NA	NA	NA
CYHR1	NACAD	TCF7L2	TCF7L2	NA	NA	NA	NA	NA	NA	NA	NA	NA	NA	NA
CYP2E1	NADK	TOMM20	TFCP2L1	NA	NA	NA	NA	NA	NA	NA	NA	NA	NA	NA
DCLK1	NCR2	TTC9	THUMPD1	NA	NA	NA	NA	NA	NA	NA	NA	NA	NA	NA
DDX24	NEFH	TUFT1	TMED2	NA	NA	NA	NA	NA	NA	NA	NA	NA	NA	NA
DISP1	NEK4	TXNRD1	TRA2A	NA	NA	NA	NA	NA	NA	NA	NA	NA	NA	NA
DMAP1	NPLOC4	UBTD2	TTC9	NA	NA	NA	NA	NA	NA	NA	NA	NA	NA	NA
DNAJC4	NR2E3	WNK4	TXNRD1	NA	NA	NA	NA	NA	NA	NA	NA	NA	NA	NA
DNASE1	OGFOD1	ZNF367	XPNPEP1	NA	NA	NA	NA	NA	NA	NA	NA	NA	NA	NA
EEF2	OR4K14	ZNF470	ZFHX2	NA	NA	NA	NA	NA	NA	NA	NA	NA	NA	NA
EFCAB7	OR51S1	NA	ZFHX3	NA	NA	NA	NA	NA	NA	NA	NA	NA	NA	NA
EFHC2	OR56A1	NA	ZNF292	NA	NA	NA	NA	NA	NA	NA	NA	NA	NA	NA
EHMT2	OR5L1	NA	ZNF470	NA	NA	NA	NA	NA	NA	NA	NA	NA	NA	NA
EIF3F	OR6Q1	NA	ZNF780A	NA	NA	NA	NA	NA	NA	NA	NA	NA	NA	NA
EPB41L2	OXTR	NA	NA	NA	NA	NA	NA	NA	NA	NA	NA	NA	NA	NA
EPHB3	PANK4	NA	NA	NA	NA	NA	NA	NA	NA	NA	NA	NA	NA	NA
EPSTI1	PDGFB	NA	NA	NA	NA	NA	NA	NA	NA	NA	NA	NA	NA	NA
EXOC3	PEX26	NA	NA	NA	NA	NA	NA	NA	NA	NA	NA	NA	NA	NA
FAM198B	PGLYRP1	NA	NA	NA	NA	NA	NA	NA	NA	NA	NA	NA	NA	NA
FAM3A	PLAT	NA	NA	NA	NA	NA	NA	NA	NA	NA	NA	NA	NA	NA
FAM71B	PLCXD1	NA	NA	NA	NA	NA	NA	NA	NA	NA	NA	NA	NA	NA
FBXO15	PLK1	NA	NA	NA	NA	NA	NA	NA	NA	NA	NA	NA	NA	NA
FBXO6	PLXNA3	NA	NA	NA	NA	NA	NA	NA	NA	NA	NA	NA	NA	NA
FBXW9	POLR2F	NA	NA	NA	NA	NA	NA	NA	NA	NA	NA	NA	NA	NA
FCGR2B	PRKAR1B	NA	NA	NA	NA	NA	NA	NA	NA	NA	NA	NA	NA	NA
FES	PRMT5	NA	NA	NA	NA	NA	NA	NA	NA	NA	NA	NA	NA	NA
FGF16	PRSS3	NA	NA	NA	NA	NA	NA	NA	NA	NA	NA	NA	NA	NA
FGGY	RALGAPB	NA	NA	NA	NA	NA	NA	NA	NA	NA	NA	NA	NA	NA
FLT3LG	RFX1	NA	NA	NA	NA	NA	NA	NA	NA	NA	NA	NA	NA	NA
FNDC5	SCN5A	NA	NA	NA	NA	NA	NA	NA	NA	NA	NA	NA	NA	NA
FOXK2	SEMA7A	NA	NA	NA	NA	NA	NA	NA	NA	NA	NA	NA	NA	NA
FOXP3	SF3B3	NA	NA	NA	NA	NA	NA	NA	NA	NA	NA	NA	NA	NA
G6PD	SH2D7	NA	NA	NA	NA	NA	NA	NA	NA	NA	NA	NA	NA	NA
GAL3ST4	SLC13A4	NA	NA	NA	NA	NA	NA	NA	NA	NA	NA	NA	NA	NA
GALM	SLFNL1	NA	NA	NA	NA	NA	NA	NA	NA	NA	NA	NA	NA	NA
GALP	SMPD1	NA	NA	NA	NA	NA	NA	NA	NA	NA	NA	NA	NA	NA
GLG1	SMTN	NA	NA	NA	NA	NA	NA	NA	NA	NA	NA	NA	NA	NA
GPR108	SP6	NA	NA	NA	NA	NA	NA	NA	NA	NA	NA	NA	NA	NA
GPR137	SPEF1	NA	NA	NA	NA	NA	NA	NA	NA	NA	NA	NA	NA	NA
GRAMD1A	SPTAN1	NA	NA	NA	NA	NA	NA	NA	NA	NA	NA	NA	NA	NA
GRIPAP1	STX1B	NA	NA	NA	NA	NA	NA	NA	NA	NA	NA	NA	NA	NA
GSTA4	SUPT6H	NA	NA	NA	NA	NA	NA	NA	NA	NA	NA	NA	NA	NA
GTF2H5	TAF6	NA	NA	NA	NA	NA	NA	NA	NA	NA	NA	NA	NA	NA
GTPBP8	TBC1D10C	NA	NA	NA	NA	NA	NA	NA	NA	NA	NA	NA	NA	NA
GUCA1B	TEX13A	NA	NA	NA	NA	NA	NA	NA	NA	NA	NA	NA	NA	NA
HAAO	TMC6	NA	NA	NA	NA	NA	NA	NA	NA	NA	NA	NA	NA	NA
HDAC10	TNFRSF10D	NA	NA	NA	NA	NA	NA	NA	NA	NA	NA	NA	NA	NA
HDAC11	TP53INP2	NA	NA	NA	NA	NA	NA	NA	NA	NA	NA	NA	NA	NA
HDLBP	TPD52L2	NA	NA	NA	NA	NA	NA	NA	NA	NA	NA	NA	NA	NA
HES1	TRIM46	NA	NA	NA	NA	NA	NA	NA	NA	NA	NA	NA	NA	NA
HFE	TRPM6	NA	NA	NA	NA	NA	NA	NA	NA	NA	NA	NA	NA	NA
HGF	TRPM8	NA	NA	NA	NA	NA	NA	NA	NA	NA	NA	NA	NA	NA
HHLA3	USH1C	NA	NA	NA	NA	NA	NA	NA	NA	NA	NA	NA	NA	NA
HOXD9	VASH2	NA	NA	NA	NA	NA	NA	NA	NA	NA	NA	NA	NA	NA
HPD	VSX1	NA	NA	NA	NA	NA	NA	NA	NA	NA	NA	NA	NA	NA
HPS1	WARS2	NA	NA	NA	NA	NA	NA	NA	NA	NA	NA	NA	NA	NA
HR	WFDC5	NA	NA	NA	NA	NA	NA	NA	NA	NA	NA	NA	NA	NA
HS1BP3	WNT2B	NA	NA	NA	NA	NA	NA	NA	NA	NA	NA	NA	NA	NA
HSPA1L	ZBTB48	NA	NA	NA	NA	NA	NA	NA	NA	NA	NA	NA	NA	NA
HSPB1	ZC3H11A	NA	NA	NA	NA	NA	NA	NA	NA	NA	NA	NA	NA	NA
HTRA3	ZFAT	NA	NA	NA	NA	NA	NA	NA	NA	NA	NA	NA	NA	NA
ID2	ZMAT4	NA	NA	NA	NA	NA	NA	NA	NA	NA	NA	NA	NA	NA
IFI35	ZNF133	NA	NA	NA	NA	NA	NA	NA	NA	NA	NA	NA	NA	NA
IFT122	ZNF285	NA	NA	NA	NA	NA	NA	NA	NA	NA	NA	NA	NA	NA
IFT46	ZNF385D	NA	NA	NA	NA	NA	NA	NA	NA	NA	NA	NA	NA	NA
IGDCC4	ZNF575	NA	NA	NA	NA	NA	NA	NA	NA	NA	NA	NA	NA	NA
IGFBP6	ZNF711	NA	NA	NA	NA	NA	NA	NA	NA	NA	NA	NA	NA	NA
IGSF6	ZNFX1	NA	NA	NA	NA	NA	NA	NA	NA	NA	NA	NA	NA	NA
IL2RB	NA	NA	NA	NA	NA	NA	NA	NA	NA	NA	NA	NA	NA	NA
INPP4B	NA	NA	NA	NA	NA	NA	NA	NA	NA	NA	NA	NA	NA	NA
IPP	NA	NA	NA	NA	NA	NA	NA	NA	NA	NA	NA	NA	NA	NA
ISLR	NA	NA	NA	NA	NA	NA	NA	NA	NA	NA	NA	NA	NA	NA
ITGA11	NA	NA	NA	NA	NA	NA	NA	NA	NA	NA	NA	NA	NA	NA
JAG1	NA	NA	NA	NA	NA	NA	NA	NA	NA	NA	NA	NA	NA	NA
KCND1	NA	NA	NA	NA	NA	NA	NA	NA	NA	NA	NA	NA	NA	NA
KCTD13	NA	NA	NA	NA	NA	NA	NA	NA	NA	NA	NA	NA	NA	NA
KDM5B	NA	NA	NA	NA	NA	NA	NA	NA	NA	NA	NA	NA	NA	NA
KLHL22	NA	NA	NA	NA	NA	NA	NA	NA	NA	NA	NA	NA	NA	NA
KSR1	NA	NA	NA	NA	NA	NA	NA	NA	NA	NA	NA	NA	NA	NA
LDB1	NA	NA	NA	NA	NA	NA	NA	NA	NA	NA	NA	NA	NA	NA
LDB2	NA	NA	NA	NA	NA	NA	NA	NA	NA	NA	NA	NA	NA	NA
LEPROTL1	NA	NA	NA	NA	NA	NA	NA	NA	NA	NA	NA	NA	NA	NA
LILRB4	NA	NA	NA	NA	NA	NA	NA	NA	NA	NA	NA	NA	NA	NA
LRRC17	NA	NA	NA	NA	NA	NA	NA	NA	NA	NA	NA	NA	NA	NA
LRRC47	NA	NA	NA	NA	NA	NA	NA	NA	NA	NA	NA	NA	NA	NA
LRSAM1	NA	NA	NA	NA	NA	NA	NA	NA	NA	NA	NA	NA	NA	NA
LTBP4	NA	NA	NA	NA	NA	NA	NA	NA	NA	NA	NA	NA	NA	NA
LYPD4	NA	NA	NA	NA	NA	NA	NA	NA	NA	NA	NA	NA	NA	NA
MAMSTR	NA	NA	NA	NA	NA	NA	NA	NA	NA	NA	NA	NA	NA	NA
MAN1B1	NA	NA	NA	NA	NA	NA	NA	NA	NA	NA	NA	NA	NA	NA
MAN1C1	NA	NA	NA	NA	NA	NA	NA	NA	NA	NA	NA	NA	NA	NA
MAP1LC3C	NA	NA	NA	NA	NA	NA	NA	NA	NA	NA	NA	NA	NA	NA
MAP2K5	NA	NA	NA	NA	NA	NA	NA	NA	NA	NA	NA	NA	NA	NA
MAP4	NA	NA	NA	NA	NA	NA	NA	NA	NA	NA	NA	NA	NA	NA
MAPK11	NA	NA	NA	NA	NA	NA	NA	NA	NA	NA	NA	NA	NA	NA
MAPK3	NA	NA	NA	NA	NA	NA	NA	NA	NA	NA	NA	NA	NA	NA
MAPK8IP1	NA	NA	NA	NA	NA	NA	NA	NA	NA	NA	NA	NA	NA	NA
MARK4	NA	NA	NA	NA	NA	NA	NA	NA	NA	NA	NA	NA	NA	NA
MAST3	NA	NA	NA	NA	NA	NA	NA	NA	NA	NA	NA	NA	NA	NA
MAST4	NA	NA	NA	NA	NA	NA	NA	NA	NA	NA	NA	NA	NA	NA
MBNL2	NA	NA	NA	NA	NA	NA	NA	NA	NA	NA	NA	NA	NA	NA
MBP	NA	NA	NA	NA	NA	NA	NA	NA	NA	NA	NA	NA	NA	NA
MCC	NA	NA	NA	NA	NA	NA	NA	NA	NA	NA	NA	NA	NA	NA
MEGF8	NA	NA	NA	NA	NA	NA	NA	NA	NA	NA	NA	NA	NA	NA
MEN1	NA	NA	NA	NA	NA	NA	NA	NA	NA	NA	NA	NA	NA	NA
MIB2	NA	NA	NA	NA	NA	NA	NA	NA	NA	NA	NA	NA	NA	NA
MLST8	NA	NA	NA	NA	NA	NA	NA	NA	NA	NA	NA	NA	NA	NA
MPPED1	NA	NA	NA	NA	NA	NA	NA	NA	NA	NA	NA	NA	NA	NA
MPPED2	NA	NA	NA	NA	NA	NA	NA	NA	NA	NA	NA	NA	NA	NA
MR1	NA	NA	NA	NA	NA	NA	NA	NA	NA	NA	NA	NA	NA	NA
MTHFR	NA	NA	NA	NA	NA	NA	NA	NA	NA	NA	NA	NA	NA	NA
MTMR1	NA	NA	NA	NA	NA	NA	NA	NA	NA	NA	NA	NA	NA	NA
MTR	NA	NA	NA	NA	NA	NA	NA	NA	NA	NA	NA	NA	NA	NA
MUC7	NA	NA	NA	NA	NA	NA	NA	NA	NA	NA	NA	NA	NA	NA
MYCBP2	NA	NA	NA	NA	NA	NA	NA	NA	NA	NA	NA	NA	NA	NA
MYOCD	NA	NA	NA	NA	NA	NA	NA	NA	NA	NA	NA	NA	NA	NA
MYOZ3	NA	NA	NA	NA	NA	NA	NA	NA	NA	NA	NA	NA	NA	NA
NBAS	NA	NA	NA	NA	NA	NA	NA	NA	NA	NA	NA	NA	NA	NA
NFE2	NA	NA	NA	NA	NA	NA	NA	NA	NA	NA	NA	NA	NA	NA
NISCH	NA	NA	NA	NA	NA	NA	NA	NA	NA	NA	NA	NA	NA	NA
NLE1	NA	NA	NA	NA	NA	NA	NA	NA	NA	NA	NA	NA	NA	NA
NLGN4Y	NA	NA	NA	NA	NA	NA	NA	NA	NA	NA	NA	NA	NA	NA
NOTCH2	NA	NA	NA	NA	NA	NA	NA	NA	NA	NA	NA	NA	NA	NA
NPLOC4	NA	NA	NA	NA	NA	NA	NA	NA	NA	NA	NA	NA	NA	NA
NR2E3	NA	NA	NA	NA	NA	NA	NA	NA	NA	NA	NA	NA	NA	NA
NSMCE1	NA	NA	NA	NA	NA	NA	NA	NA	NA	NA	NA	NA	NA	NA
NTNG1	NA	NA	NA	NA	NA	NA	NA	NA	NA	NA	NA	NA	NA	NA
NUDT13	NA	NA	NA	NA	NA	NA	NA	NA	NA	NA	NA	NA	NA	NA
OAF	NA	NA	NA	NA	NA	NA	NA	NA	NA	NA	NA	NA	NA	NA
ODF3L1	NA	NA	NA	NA	NA	NA	NA	NA	NA	NA	NA	NA	NA	NA
OGFOD2	NA	NA	NA	NA	NA	NA	NA	NA	NA	NA	NA	NA	NA	NA
OR10A3	NA	NA	NA	NA	NA	NA	NA	NA	NA	NA	NA	NA	NA	NA
OR4K14	NA	NA	NA	NA	NA	NA	NA	NA	NA	NA	NA	NA	NA	NA
OR56A1	NA	NA	NA	NA	NA	NA	NA	NA	NA	NA	NA	NA	NA	NA
OR5L1	NA	NA	NA	NA	NA	NA	NA	NA	NA	NA	NA	NA	NA	NA
OR6Q1	NA	NA	NA	NA	NA	NA	NA	NA	NA	NA	NA	NA	NA	NA
PANK3	NA	NA	NA	NA	NA	NA	NA	NA	NA	NA	NA	NA	NA	NA
PARP10	NA	NA	NA	NA	NA	NA	NA	NA	NA	NA	NA	NA	NA	NA
PARP16	NA	NA	NA	NA	NA	NA	NA	NA	NA	NA	NA	NA	NA	NA
PATZ1	NA	NA	NA	NA	NA	NA	NA	NA	NA	NA	NA	NA	NA	NA
PCSK5	NA	NA	NA	NA	NA	NA	NA	NA	NA	NA	NA	NA	NA	NA
PDE5A	NA	NA	NA	NA	NA	NA	NA	NA	NA	NA	NA	NA	NA	NA
PDGFB	NA	NA	NA	NA	NA	NA	NA	NA	NA	NA	NA	NA	NA	NA
PDK2	NA	NA	NA	NA	NA	NA	NA	NA	NA	NA	NA	NA	NA	NA
PEF1	NA	NA	NA	NA	NA	NA	NA	NA	NA	NA	NA	NA	NA	NA
PIP5KL1	NA	NA	NA	NA	NA	NA	NA	NA	NA	NA	NA	NA	NA	NA
PLA2G6	NA	NA	NA	NA	NA	NA	NA	NA	NA	NA	NA	NA	NA	NA
PLEKHF1	NA	NA	NA	NA	NA	NA	NA	NA	NA	NA	NA	NA	NA	NA
PLEKHG4	NA	NA	NA	NA	NA	NA	NA	NA	NA	NA	NA	NA	NA	NA
POLR2F	NA	NA	NA	NA	NA	NA	NA	NA	NA	NA	NA	NA	NA	NA
POLRMT	NA	NA	NA	NA	NA	NA	NA	NA	NA	NA	NA	NA	NA	NA
PPM1M	NA	NA	NA	NA	NA	NA	NA	NA	NA	NA	NA	NA	NA	NA
PRDM16	NA	NA	NA	NA	NA	NA	NA	NA	NA	NA	NA	NA	NA	NA
PRDX2	NA	NA	NA	NA	NA	NA	NA	NA	NA	NA	NA	NA	NA	NA
PRICKLE2	NA	NA	NA	NA	NA	NA	NA	NA	NA	NA	NA	NA	NA	NA
PRKAG1	NA	NA	NA	NA	NA	NA	NA	NA	NA	NA	NA	NA	NA	NA
PRKAR1B	NA	NA	NA	NA	NA	NA	NA	NA	NA	NA	NA	NA	NA	NA
PRMT7	NA	NA	NA	NA	NA	NA	NA	NA	NA	NA	NA	NA	NA	NA
PRSS54	NA	NA	NA	NA	NA	NA	NA	NA	NA	NA	NA	NA	NA	NA
PTCD3	NA	NA	NA	NA	NA	NA	NA	NA	NA	NA	NA	NA	NA	NA
PTCH1	NA	NA	NA	NA	NA	NA	NA	NA	NA	NA	NA	NA	NA	NA
PTP4A3	NA	NA	NA	NA	NA	NA	NA	NA	NA	NA	NA	NA	NA	NA
PYCR2	NA	NA	NA	NA	NA	NA	NA	NA	NA	NA	NA	NA	NA	NA
RAI1	NA	NA	NA	NA	NA	NA	NA	NA	NA	NA	NA	NA	NA	NA
RBCK1	NA	NA	NA	NA	NA	NA	NA	NA	NA	NA	NA	NA	NA	NA
RECQL5	NA	NA	NA	NA	NA	NA	NA	NA	NA	NA	NA	NA	NA	NA
RGL2	NA	NA	NA	NA	NA	NA	NA	NA	NA	NA	NA	NA	NA	NA
RNASEL	NA	NA	NA	NA	NA	NA	NA	NA	NA	NA	NA	NA	NA	NA
RNF123	NA	NA	NA	NA	NA	NA	NA	NA	NA	NA	NA	NA	NA	NA
RNF125	NA	NA	NA	NA	NA	NA	NA	NA	NA	NA	NA	NA	NA	NA
RNF40	NA	NA	NA	NA	NA	NA	NA	NA	NA	NA	NA	NA	NA	NA
RPL22L1	NA	NA	NA	NA	NA	NA	NA	NA	NA	NA	NA	NA	NA	NA
RRBP1	NA	NA	NA	NA	NA	NA	NA	NA	NA	NA	NA	NA	NA	NA
S100A14	NA	NA	NA	NA	NA	NA	NA	NA	NA	NA	NA	NA	NA	NA
SAT1	NA	NA	NA	NA	NA	NA	NA	NA	NA	NA	NA	NA	NA	NA
SCARA3	NA	NA	NA	NA	NA	NA	NA	NA	NA	NA	NA	NA	NA	NA
SCNN1A	NA	NA	NA	NA	NA	NA	NA	NA	NA	NA	NA	NA	NA	NA
SCNN1D	NA	NA	NA	NA	NA	NA	NA	NA	NA	NA	NA	NA	NA	NA
SDK1	NA	NA	NA	NA	NA	NA	NA	NA	NA	NA	NA	NA	NA	NA
SELENBP1	NA	NA	NA	NA	NA	NA	NA	NA	NA	NA	NA	NA	NA	NA
SEMA3B	NA	NA	NA	NA	NA	NA	NA	NA	NA	NA	NA	NA	NA	NA
SEMA3G	NA	NA	NA	NA	NA	NA	NA	NA	NA	NA	NA	NA	NA	NA
SEMA4B	NA	NA	NA	NA	NA	NA	NA	NA	NA	NA	NA	NA	NA	NA
SH3BP5	NA	NA	NA	NA	NA	NA	NA	NA	NA	NA	NA	NA	NA	NA
SIAE	NA	NA	NA	NA	NA	NA	NA	NA	NA	NA	NA	NA	NA	NA
SIRT2	NA	NA	NA	NA	NA	NA	NA	NA	NA	NA	NA	NA	NA	NA
SIRT3	NA	NA	NA	NA	NA	NA	NA	NA	NA	NA	NA	NA	NA	NA
SIRT5	NA	NA	NA	NA	NA	NA	NA	NA	NA	NA	NA	NA	NA	NA
SLC16A4	NA	NA	NA	NA	NA	NA	NA	NA	NA	NA	NA	NA	NA	NA
SLC22A12	NA	NA	NA	NA	NA	NA	NA	NA	NA	NA	NA	NA	NA	NA
SLC35E4	NA	NA	NA	NA	NA	NA	NA	NA	NA	NA	NA	NA	NA	NA
SLC45A1	NA	NA	NA	NA	NA	NA	NA	NA	NA	NA	NA	NA	NA	NA
SLFNL1	NA	NA	NA	NA	NA	NA	NA	NA	NA	NA	NA	NA	NA	NA
SMARCD3	NA	NA	NA	NA	NA	NA	NA	NA	NA	NA	NA	NA	NA	NA
SMG6	NA	NA	NA	NA	NA	NA	NA	NA	NA	NA	NA	NA	NA	NA
SNTG1	NA	NA	NA	NA	NA	NA	NA	NA	NA	NA	NA	NA	NA	NA
SNUPN	NA	NA	NA	NA	NA	NA	NA	NA	NA	NA	NA	NA	NA	NA
SNX21	NA	NA	NA	NA	NA	NA	NA	NA	NA	NA	NA	NA	NA	NA
SPATA4	NA	NA	NA	NA	NA	NA	NA	NA	NA	NA	NA	NA	NA	NA
SPG7	NA	NA	NA	NA	NA	NA	NA	NA	NA	NA	NA	NA	NA	NA
SPNS1	NA	NA	NA	NA	NA	NA	NA	NA	NA	NA	NA	NA	NA	NA
TAF1	NA	NA	NA	NA	NA	NA	NA	NA	NA	NA	NA	NA	NA	NA
TBC1D10C	NA	NA	NA	NA	NA	NA	NA	NA	NA	NA	NA	NA	NA	NA
TBC1D17	NA	NA	NA	NA	NA	NA	NA	NA	NA	NA	NA	NA	NA	NA
TBCD	NA	NA	NA	NA	NA	NA	NA	NA	NA	NA	NA	NA	NA	NA
TCF25	NA	NA	NA	NA	NA	NA	NA	NA	NA	NA	NA	NA	NA	NA
TEX13A	NA	NA	NA	NA	NA	NA	NA	NA	NA	NA	NA	NA	NA	NA
THAP11	NA	NA	NA	NA	NA	NA	NA	NA	NA	NA	NA	NA	NA	NA
THAP8	NA	NA	NA	NA	NA	NA	NA	NA	NA	NA	NA	NA	NA	NA
THRA	NA	NA	NA	NA	NA	NA	NA	NA	NA	NA	NA	NA	NA	NA
TLE3	NA	NA	NA	NA	NA	NA	NA	NA	NA	NA	NA	NA	NA	NA
TLR3	NA	NA	NA	NA	NA	NA	NA	NA	NA	NA	NA	NA	NA	NA
TMC6	NA	NA	NA	NA	NA	NA	NA	NA	NA	NA	NA	NA	NA	NA
TMEM115	NA	NA	NA	NA	NA	NA	NA	NA	NA	NA	NA	NA	NA	NA
TMEM45A	NA	NA	NA	NA	NA	NA	NA	NA	NA	NA	NA	NA	NA	NA
TP53I3	NA	NA	NA	NA	NA	NA	NA	NA	NA	NA	NA	NA	NA	NA
TP53INP2	NA	NA	NA	NA	NA	NA	NA	NA	NA	NA	NA	NA	NA	NA
TPRG1L	NA	NA	NA	NA	NA	NA	NA	NA	NA	NA	NA	NA	NA	NA
TRIL	NA	NA	NA	NA	NA	NA	NA	NA	NA	NA	NA	NA	NA	NA
TRIM4	NA	NA	NA	NA	NA	NA	NA	NA	NA	NA	NA	NA	NA	NA
TRPM6	NA	NA	NA	NA	NA	NA	NA	NA	NA	NA	NA	NA	NA	NA
TRPM8	NA	NA	NA	NA	NA	NA	NA	NA	NA	NA	NA	NA	NA	NA
TSC2	NA	NA	NA	NA	NA	NA	NA	NA	NA	NA	NA	NA	NA	NA
UBA7	NA	NA	NA	NA	NA	NA	NA	NA	NA	NA	NA	NA	NA	NA
UBE2L6	NA	NA	NA	NA	NA	NA	NA	NA	NA	NA	NA	NA	NA	NA
UBE3B	NA	NA	NA	NA	NA	NA	NA	NA	NA	NA	NA	NA	NA	NA
UCK1	NA	NA	NA	NA	NA	NA	NA	NA	NA	NA	NA	NA	NA	NA
UNC45A	NA	NA	NA	NA	NA	NA	NA	NA	NA	NA	NA	NA	NA	NA
USP20	NA	NA	NA	NA	NA	NA	NA	NA	NA	NA	NA	NA	NA	NA
VAC14	NA	NA	NA	NA	NA	NA	NA	NA	NA	NA	NA	NA	NA	NA
VASH2	NA	NA	NA	NA	NA	NA	NA	NA	NA	NA	NA	NA	NA	NA
VPS8	NA	NA	NA	NA	NA	NA	NA	NA	NA	NA	NA	NA	NA	NA
VSX1	NA	NA	NA	NA	NA	NA	NA	NA	NA	NA	NA	NA	NA	NA
WASF2	NA	NA	NA	NA	NA	NA	NA	NA	NA	NA	NA	NA	NA	NA
WT1-AS	NA	NA	NA	NA	NA	NA	NA	NA	NA	NA	NA	NA	NA	NA
XAB2	NA	NA	NA	NA	NA	NA	NA	NA	NA	NA	NA	NA	NA	NA
YTHDF3	NA	NA	NA	NA	NA	NA	NA	NA	NA	NA	NA	NA	NA	NA
ZBTB48	NA	NA	NA	NA	NA	NA	NA	NA	NA	NA	NA	NA	NA	NA
ZBTB7C	NA	NA	NA	NA	NA	NA	NA	NA	NA	NA	NA	NA	NA	NA
ZFAT	NA	NA	NA	NA	NA	NA	NA	NA	NA	NA	NA	NA	NA	NA
ZFHX2	NA	NA	NA	NA	NA	NA	NA	NA	NA	NA	NA	NA	NA	NA
ZFP30	NA	NA	NA	NA	NA	NA	NA	NA	NA	NA	NA	NA	NA	NA
ZFP64	NA	NA	NA	NA	NA	NA	NA	NA	NA	NA	NA	NA	NA	NA
ZMAT4	NA	NA	NA	NA	NA	NA	NA	NA	NA	NA	NA	NA	NA	NA
ZMYM3	NA	NA	NA	NA	NA	NA	NA	NA	NA	NA	NA	NA	NA	NA
ZNF132	NA	NA	NA	NA	NA	NA	NA	NA	NA	NA	NA	NA	NA	NA
ZNF18	NA	NA	NA	NA	NA	NA	NA	NA	NA	NA	NA	NA	NA	NA
ZNF337	NA	NA	NA	NA	NA	NA	NA	NA	NA	NA	NA	NA	NA	NA
ZNF358	NA	NA	NA	NA	NA	NA	NA	NA	NA	NA	NA	NA	NA	NA
ZNF500	NA	NA	NA	NA	NA	NA	NA	NA	NA	NA	NA	NA	NA	NA
ZNF589	NA	NA	NA	NA	NA	NA	NA	NA	NA	NA	NA	NA	NA	NA
ZNF618	NA	NA	NA	NA	NA	NA	NA	NA	NA	NA	NA	NA	NA	NA
ZNF711	NA	NA	NA	NA	NA	NA	NA	NA	NA	NA	NA	NA	NA	NA
ZNF780B	NA	NA	NA	NA	NA	NA	NA	NA	NA	NA	NA	NA	NA	NA
ZNF81	NA	NA	NA	NA	NA	NA	NA	NA	NA	NA	NA	NA	NA	NA
ZNFX1	NA	NA	NA	NA	NA	NA	NA	NA	NA	NA	NA	NA	NA	NA
ZP1	NA	NA	NA	NA	NA	NA	NA	NA	NA	NA	NA	NA	NA	NA
ZSWIM3	NA	NA	NA	NA	NA	NA	NA	NA	NA	NA	NA	NA	NA	NA

## Sheet: GSE59861_12h_EMTAB2086
X1_sets_EMTAB2086_70_vs_30	X1_sets_EMTAB2086_80_vs_30	X1_sets_GSE59861_12h_2Gy	X1_sets_GSE59861_12h_5cGy	X2_sets_EMTAB2086_70_vs_30_EMTAB2086_80_vs_30	X2_sets_EMTAB2086_70_vs_30_GSE59861_12h_2Gy	X2_sets_EMTAB2086_70_vs_30_GSE59861_12h_5cGy	X2_sets_EMTAB2086_80_vs_30_GSE59861_12h_2Gy	X2_sets_EMTAB2086_80_vs_30_GSE59861_12h_5cGy	X2_sets_GSE59861_12h_2Gy_GSE59861_12h_5cGy	X3_sets_EMTAB2086_70_vs_30_EMTAB2086_80_vs_30_GSE59861_12h_2Gy	X3_sets_EMTAB2086_70_vs_30_EMTAB2086_80_vs_30_GSE59861_12h_5cGy	X3_sets_EMTAB2086_70_vs_30_GSE59861_12h_2Gy_GSE59861_12h_5cGy	X3_sets_EMTAB2086_80_vs_30_GSE59861_12h_2Gy_GSE59861_12h_5cGy	X4_sets_EMTAB2086_70_vs_30_EMTAB2086_80_vs_30_GSE59861_12h_2Gy_GSE59861_12h_5cGy
AAAS	AAAS	ADAMTS1	ABCE1	AAAS	ADARB1	ARRB2	ADARB1	AMD1	ADAMTS1	ADARB1	ARRB2	C20ORF96	AMD1	C20ORF96
ACD	AADAT	ADARB1	ACADSB	ACD	ATAD2	C20ORF96	ADNP2	ARRB2	AIDA	ATAD2	C20ORF96	CDC6	C20ORF96	CDC6
ACTC1	AASDH	ADNP2	ACBD3	ACTC1	BEND3	CDC6	AMD1	BTN3A1	AMD1	BEND3	CDC6	MCM6	CDC6	MCM6
ACTR5	AASDHPPT	ADRA1D	ADAMTS1	ACTR5	C1ORF21	CDCA2	ANKRD11	C20ORF96	ARHGAP26	C1ORF21	CDCA2	MSH6	DKC1	MSH6
ADAMTS3	AASS	AIDA	AIDA	ADAMTS3	C20ORF96	HSPD1	ATAD2	CCT2	C1ORF174	C20ORF96	HSPD1	SMC1A	EGR1	SMC1A
ADARB1	AATF	AKAP13	ALCAM	ADARB1	CDC25A	MCM6	ATF7IP	CDC6	C20ORF96	CDC25A	MCM6	SORD	G3BP1	SORD
ADCY3	ABCB7	ALG2	AMD1	ADCY3	CDC45	MIS12	BAZ1B	CDCA2	CAB39	CDC45	MIS12	TOP1	GABPB1	TOP1
ADPRH	ABCC9	AMD1	ANGPTL4	AGK	CDC6	MSH6	BEND3	DKC1	CALD1	CDC6	MSH6	TXNRD1	GART	TXNRD1
AGK	ABCF2	ANKRD11	APBB2	AGPAT5	CDCA7	NOLC1	BRD2	EGR1	CAP2	CDCA7	NOLC1	NA	GREM2	NA
AGPAT5	ABCG2	ANKRD17	AR	AKAP1	CDCA7L	SMC1A	BRD4	ELOVL5	CCDC91	CDCA7L	SMC1A	NA	HSPA2	NA
AKAP1	ABHD10	ANXA3	ARFGAP3	AKR1E2	CHAF1A	SORD	C1ORF21	EPS8	CCND1	CHAF1A	SORD	NA	HSPH1	NA
AKR1E2	ABHD2	AP3D1	ARHGAP26	ALDH1A3	DNMT1	TOP1	C20ORF96	FRYL	CD44	DNMT1	TOP1	NA	ID4	NA
ALDH1A3	ABHD3	AP3M2	ARL2BP	ALMS1	DTL	TXNRD1	CBL	G3BP1	CDC6	DTL	TXNRD1	NA	KHDRBS3	NA
ALDH3A2	ABI2	ARGLU1	ARRB2	AMOT	EXO1	NA	CCNE2	GABPB1	CDH11	EXO1	NA	NA	MCM6	NA
ALG9	ABI3	ARHGAP26	ASPH	ANGEL2	FEN1	NA	CDC25A	GART	CHST11	FEN1	NA	NA	MSH6	NA
ALMS1	ABI3BP	ARID5B	ATF6	ANKRD28	GCNT1	NA	CDC45	GNL3	CLDN1	GCNT1	NA	NA	NR1D2	NA
AMOT	ABT1	ARPC5L	ATP10D	ANP32A	GINS1	NA	CDC6	GREM2	CYTH2	GINS1	NA	NA	SEH1L	NA
ANGEL2	ACACA	ATAD2	ATP2B4	ANP32B	GINS3	NA	CDCA7	HSPA2	DCBLD2	GINS3	NA	NA	SMC1A	NA
ANKRD28	ACAD10	ATF7IP	ATP6V1A	AP1G2	MCM10	NA	CDCA7L	HSPD1	DKC1	MCM10	NA	NA	SORD	NA
ANP32A	ACAD9	ATXN7L3B	ATRX	APCDD1L	MCM3	NA	CDT1	HSPH1	DUSP2	MCM3	NA	NA	SRSF10	NA
ANP32B	ACADM	BAZ1B	ATXN7L1	APEX1	MCM4	NA	CHAF1A	ID4	DYNC1H1	MCM4	NA	NA	TOP1	NA
AP1G2	ACAT1	BDNF	B4GALT4	APEX2	MCM6	NA	CHD4	KHDRBS3	EGR1	MCM6	NA	NA	TRA2B	NA
APCDD1L	ACAT2	BEND3	BCOR	APOLD1	MSH6	NA	CLSPN	MCM6	EIF2AK3	MSH6	NA	NA	TXNRD1	NA
APEX1	ACBD6	BICC1	BIRC3	AQR	ORC1	NA	DEK	MIS12	EIF4G1	ORC1	NA	NA	ZNF398	NA
APEX2	ACD	BICD2	BTN3A1	ARHGAP32	PARP1	NA	DKC1	MSH6	EPRS	PARP1	NA	NA	NA	NA
APOL4	ACIN1	BMPR2	C1ORF174	ARHGAP42	RAD51	NA	DNMT1	NOLC1	EREG	RAD51	NA	NA	NA	NA
APOLD1	ACSL3	BRD2	C20ORF96	ARHGEF26	RFC4	NA	DTL	NR1D2	FAF2	RFC4	NA	NA	NA	NA
AQR	ACTC1	BRD4	CAB39	ARID2	SLFN11	NA	EGR1	PITPNB	FGF5	SLFN11	NA	NA	NA	NA
ARHGAP32	ACTL6A	C1ORF174	CALD1	ARID3B	SMARCA4	NA	EXO1	POLR2C	FOS	SMARCA4	NA	NA	NA	NA
ARHGAP42	ACTR5	C1ORF21	CAP2	ARL9	SMARCC1	NA	FEN1	PPIF	FRMD3	SMARCC1	NA	NA	NA	NA
ARHGEF26	ADAL	C20ORF96	CAPZA1	ARRB2	SMC1A	NA	G3BP1	SEH1L	G3BP1	SMC1A	NA	NA	NA	NA
ARID2	ADAMTS3	C3ORF52	CCDC91	ARSI	SORD	NA	GABPB1	SLC7A2	GABPB1	SORD	NA	NA	NA	NA
ARID3B	ADAMTS6	C6ORF106	CCND1	ASF1A	SPEN	NA	GART	SMC1A	GAPVD1	SPEN	NA	NA	NA	NA
ARL9	ADARB1	C9ORF3	CCT2	ASF1B	SSRP1	NA	GCNT1	SORD	GART	SSRP1	NA	NA	NA	NA
ARRB2	ADAT2	CAB39	CD44	ATAD2	TCF19	NA	GINS1	SRSF10	GIGYF2	TCF19	NA	NA	NA	NA
ARSI	ADCY3	CACNB4	CDC16	ATG4C	TIPIN	NA	GINS3	STIP1	GREM2	TIPIN	NA	NA	NA	NA
ASF1A	ADNP	CALD1	CDC6	AURKB	TMEM209	NA	GJC1	STXBP5	GTPBP4	TMEM209	NA	NA	NA	NA
ASF1B	ADNP2	CAP2	CDC73	AUTS2	TOP1	NA	GREM2	TAF3	HSPA2	TOP1	NA	NA	NA	NA
ATAD2	ADSL	CAST	CDCA2	AXL	TXNRD1	NA	HSPA2	TCEA1	HSPA5	TXNRD1	NA	NA	NA	NA
ATG4C	AFG3L2	CBL	CDH11	B3GALNT1	UHRF1	NA	HSPH1	THUMPD1	HSPA8	UHRF1	NA	NA	NA	NA
AURKB	AGBL2	CCDC12	CHST11	B3GALT1	UNG	NA	ID4	TIA1	HSPH1	UNG	NA	NA	NA	NA
AUTS2	AGK	CCDC22	CITED2	B3GNT5	WDR76	NA	KHDRBS3	TOP1	ID4	WDR76	NA	NA	NA	NA
AXL	AGPAT4	CCDC80	CLDN1	B4GALT5	WWC1	NA	LANCL1	TRA2B	JUN	WWC1	NA	NA	NA	NA
B3GALNT1	AGPAT5	CCDC91	COQ10B	B4GALT6	ZNF273	NA	LSG1	TXNRD1	KBTBD2	ZNF273	NA	NA	NA	NA
B3GALT1	AHI1	CCND1	CYTH2	BCL2L11	ZNF367	NA	MCM10	UGDH	KHDRBS3	ZNF367	NA	NA	NA	NA
B3GNT5	AKAP1	CCNE2	DCBLD2	BCL3	NA	NA	MCM3	WDR4	LRRFIP1	NA	NA	NA	NA	NA
B4GALT5	AKAP7	CD44	DKC1	BCL9	NA	NA	MCM4	ZNF398	MCM6	NA	NA	NA	NA	NA
B4GALT6	AKIRIN2	CD48	DNAJB9	BCLAF1	NA	NA	MCM6	NA	MPP5	NA	NA	NA	NA	NA
BCL2L11	AKR1C1	CDC25A	DUSP1	BCS1L	NA	NA	MSH6	NA	MSH6	NA	NA	NA	NA	NA
BCL3	AKR1E2	CDC45	DUSP2	BEND3	NA	NA	NFIC	NA	NEDD9	NA	NA	NA	NA	NA
BCL9	ALDH1A3	CDC6	DYNC1H1	BIRC5	NA	NA	NLN	NA	NES	NA	NA	NA	NA	NA
BCLAF1	ALG14	CDCA7	EGR1	BLM	NA	NA	NR1D2	NA	NR1D2	NA	NA	NA	NA	NA
BCS1L	ALG6	CDCA7L	EIF2AK3	BNC1	NA	NA	ORC1	NA	NR3C1	NA	NA	NA	NA	NA
BEND3	ALKBH1	CDH11	EIF4G1	BRD7	NA	NA	PARP1	NA	NTM	NA	NA	NA	NA	NA
BIRC5	ALKBH8	CDK5R1	ELF1	BRIX1	NA	NA	PDCD11	NA	PDE4DIP	NA	NA	NA	NA	NA
BLM	ALMS1	CDT1	ELOVL5	BUB1	NA	NA	PER2	NA	PDP1	NA	NA	NA	NA	NA
BNC1	ALPK1	CHAF1A	EPHB1	BUD13	NA	NA	PPRC1	NA	PRRC1	NA	NA	NA	NA	NA
BRD7	AMD1	CHD4	EPRS	C10ORF82	NA	NA	PRRX1	NA	RGS16	NA	NA	NA	NA	NA
BRIX1	AMMECR1	CHST11	EPS8	C17ORF53	NA	NA	RAD51	NA	RGS4	NA	NA	NA	NA	NA
BUB1	AMOT	CLDN1	EREG	C19ORF44	NA	NA	RBM22	NA	RHOBTB1	NA	NA	NA	NA	NA
BUD13	AMPH	CLIC4	ERGIC2	C19ORF48	NA	NA	RFC4	NA	SEH1L	NA	NA	NA	NA	NA
C10ORF82	ANAPC1	CLSPN	ETNK1	C1ORF112	NA	NA	RGS12	NA	SFXN1	NA	NA	NA	NA	NA
C17ORF53	ANGEL2	CLSTN1	ETV3	C1ORF21	NA	NA	RRM2	NA	SH3KBP1	NA	NA	NA	NA	NA
C19ORF44	ANKRD11	CMTM4	FAF2	C1ORF220	NA	NA	SECISBP2	NA	SH3RF1	NA	NA	NA	NA	NA
C19ORF48	ANKRD13A	CNST	FAM98A	C20ORF96	NA	NA	SEH1L	NA	SLAIN2	NA	NA	NA	NA	NA
C1ORF112	ANKRD28	CPNE3	FGD4	C3ORF14	NA	NA	SFMBT1	NA	SLC31A1	NA	NA	NA	NA	NA
C1ORF21	ANKRD50	CYTH2	FGF5	C4ORF46	NA	NA	SLFN11	NA	SMC1A	NA	NA	NA	NA	NA
C1ORF220	ANLN	DCBLD2	FOS	CABLES2	NA	NA	SMARCA4	NA	SON	NA	NA	NA	NA	NA
C20ORF96	ANP32A	DEFB116	FOXO1	CACHD1	NA	NA	SMARCC1	NA	SORD	NA	NA	NA	NA	NA
C3ORF14	ANP32B	DEFB126	FRMD3	CACYBP	NA	NA	SMC1A	NA	SRSF10	NA	NA	NA	NA	NA
C4ORF46	ANP32E	DEK	FRYL	CAD	NA	NA	SORD	NA	SRSF5	NA	NA	NA	NA	NA
CABLES2	AP1G2	DKC1	G3BP1	CALML4	NA	NA	SPEN	NA	SYNCRIP	NA	NA	NA	NA	NA
CACHD1	AP4B1	DLGAP4	GABPB1	CAMK1G	NA	NA	SRSF10	NA	TAF13	NA	NA	NA	NA	NA
CACYBP	AP4S1	DLX1	GAPVD1	CAMK4	NA	NA	SSRP1	NA	TES	NA	NA	NA	NA	NA
CAD	APCDD1L	DMAP1	GART	CASP2	NA	NA	TAF1B	NA	TIMP3	NA	NA	NA	NA	NA
CALML4	APEX1	DNAH11	GIGYF2	CBX5	NA	NA	TBL1X	NA	TOP1	NA	NA	NA	NA	NA
CAMK1G	APEX2	DNAJC1	GNL3	CCDC134	NA	NA	TCF19	NA	TRA2A	NA	NA	NA	NA	NA
CAMK4	APH1A	DNMT1	GOLPH3	CCDC138	NA	NA	TFB2M	NA	TRA2B	NA	NA	NA	NA	NA
CARHSP1	API5	DTL	GREM2	CCDC34	NA	NA	TIPIN	NA	TTC9	NA	NA	NA	NA	NA
CASP2	APOBEC3F	DTNA	GTPBP4	CCDC58	NA	NA	TMEM209	NA	TXNRD1	NA	NA	NA	NA	NA
CBX5	APOLD1	DUSP2	HSPA2	CCDC77	NA	NA	TOP1	NA	USO1	NA	NA	NA	NA	NA
CCDC134	APOO	DYNC1H1	HSPA5	CCDC86	NA	NA	TRA2B	NA	WASF2	NA	NA	NA	NA	NA
CCDC138	AQR	EFNB2	HSPA8	CCDC89	NA	NA	TXNRD1	NA	WNK1	NA	NA	NA	NA	NA
CCDC3	ARAP3	EFR3A	HSPD1	CCDC97	NA	NA	UHRF1	NA	WNK4	NA	NA	NA	NA	NA
CCDC34	ARHGAP11A	EGR1	HSPH1	CCNA2	NA	NA	UNG	NA	XRN2	NA	NA	NA	NA	NA
CCDC58	ARHGAP17	EIF2AK1	ID4	CCNB1	NA	NA	WDR76	NA	YRDC	NA	NA	NA	NA	NA
CCDC77	ARHGAP32	EIF2AK3	IL1RL2	CCNB2	NA	NA	WWC1	NA	ZFR	NA	NA	NA	NA	NA
CCDC86	ARHGAP42	EIF4G1	JUN	CCNF	NA	NA	ZNF273	NA	ZNF398	NA	NA	NA	NA	NA
CCDC89	ARHGDIA	ELK4	KBTBD2	CD320	NA	NA	ZNF367	NA	ZNF431	NA	NA	NA	NA	NA
CCDC97	ARHGEF11	ENAH	KHDRBS3	CDC20	NA	NA	ZNF398	NA	ZSWIM6	NA	NA	NA	NA	NA
CCNA2	ARHGEF2	EPRS	LRRFIP1	CDC25A	NA	NA	ZNF480	NA	NA	NA	NA	NA	NA	NA
CCNB1	ARHGEF26	EREG	MAP3K2	CDC25B	NA	NA	NA	NA	NA	NA	NA	NA	NA	NA
CCNB2	ARID1A	ETV5	MCM6	CDC25C	NA	NA	NA	NA	NA	NA	NA	NA	NA	NA
CCNF	ARID1B	EXO1	METTL3	CDC45	NA	NA	NA	NA	NA	NA	NA	NA	NA	NA
CD320	ARID2	FABP6	MIS12	CDC6	NA	NA	NA	NA	NA	NA	NA	NA	NA	NA
CDC20	ARID3B	FAF2	MPP5	CDC7	NA	NA	NA	NA	NA	NA	NA	NA	NA	NA
CDC25A	ARL13B	FAM120A	MSH6	CDCA2	NA	NA	NA	NA	NA	NA	NA	NA	NA	NA
CDC25B	ARL4A	FBXO11	NARS	CDCA3	NA	NA	NA	NA	NA	NA	NA	NA	NA	NA
CDC25C	ARL5A	FCRL1	NDEL1	CDCA4	NA	NA	NA	NA	NA	NA	NA	NA	NA	NA
CDC45	ARL6IP1	FEN1	NEDD9	CDCA5	NA	NA	NA	NA	NA	NA	NA	NA	NA	NA
CDC6	ARL9	FGF1	NES	CDCA7	NA	NA	NA	NA	NA	NA	NA	NA	NA	NA
CDC7	ARMC10	FGF5	NOLC1	CDCA7L	NA	NA	NA	NA	NA	NA	NA	NA	NA	NA
CDCA2	ARMC6	FKBP15	NR1D2	CDCA8	NA	NA	NA	NA	NA	NA	NA	NA	NA	NA
CDCA3	ARNTL2	FLT1	NR3C1	CDK1	NA	NA	NA	NA	NA	NA	NA	NA	NA	NA
CDCA4	ARRB2	FOS	NRG1	CDK16	NA	NA	NA	NA	NA	NA	NA	NA	NA	NA
CDCA5	ARSI	FOXC1	NTM	CDK4	NA	NA	NA	NA	NA	NA	NA	NA	NA	NA
CDCA7	ARSJ	FOXO3	PAPOLA	CDKAL1	NA	NA	NA	NA	NA	NA	NA	NA	NA	NA
CDCA7L	ASF1A	FRMD3	PAPSS1	CDKN1B	NA	NA	NA	NA	NA	NA	NA	NA	NA	NA
CDCA8	ASF1B	FZD1	PDE4DIP	CDKN2C	NA	NA	NA	NA	NA	NA	NA	NA	NA	NA
CDK1	ASPM	G3BP1	PDP1	CDKN3	NA	NA	NA	NA	NA	NA	NA	NA	NA	NA
CDK16	ASTE1	GAB4	PHACTR2	CENPA	NA	NA	NA	NA	NA	NA	NA	NA	NA	NA
CDK4	ASXL1	GABPB1	PICALM	CENPF	NA	NA	NA	NA	NA	NA	NA	NA	NA	NA
CDKAL1	ASXL2	GAPVD1	PIK3R1	CENPH	NA	NA	NA	NA	NA	NA	NA	NA	NA	NA
CDKN1B	ATAD2	GART	PITPNB	CENPJ	NA	NA	NA	NA	NA	NA	NA	NA	NA	NA
CDKN2AIPNL	ATAD2B	GCLM	POLR2C	CENPM	NA	NA	NA	NA	NA	NA	NA	NA	NA	NA
CDKN2C	ATAD5	GCNT1	PPIF	CENPO	NA	NA	NA	NA	NA	NA	NA	NA	NA	NA
CDKN3	ATAT1	GIGYF2	PRRC1	CENPP	NA	NA	NA	NA	NA	NA	NA	NA	NA	NA
CDON	ATF1	GINS1	RAB27A	CENPW	NA	NA	NA	NA	NA	NA	NA	NA	NA	NA
CENPA	ATF7IP	GINS3	RGS16	CEP250	NA	NA	NA	NA	NA	NA	NA	NA	NA	NA
CENPF	ATG4C	GJC1	RGS4	CEP55	NA	NA	NA	NA	NA	NA	NA	NA	NA	NA
CENPH	ATIC	GLI2	RHOBTB1	CEP57	NA	NA	NA	NA	NA	NA	NA	NA	NA	NA
CENPJ	ATL2	GLIS3	RIPK1	CEP72	NA	NA	NA	NA	NA	NA	NA	NA	NA	NA
CENPM	ATN1	GNB1	RLIM	CHAF1A	NA	NA	NA	NA	NA	NA	NA	NA	NA	NA
CENPO	ATP11C	GNLY	RPL14	CHAF1B	NA	NA	NA	NA	NA	NA	NA	NA	NA	NA
CENPP	ATP2B1	GPATCH8	SEC23A	CHEK1	NA	NA	NA	NA	NA	NA	NA	NA	NA	NA
CENPW	ATPAF1	GREM2	SEH1L	CHEK2	NA	NA	NA	NA	NA	NA	NA	NA	NA	NA
CEP250	ATR	GTPBP4	SFXN1	CHKA	NA	NA	NA	NA	NA	NA	NA	NA	NA	NA
CEP55	ATXN2L	HSPA2	SH2D2A	CHRNA5	NA	NA	NA	NA	NA	NA	NA	NA	NA	NA
CEP57	AURKA	HSPA5	SH3KBP1	CHTF18	NA	NA	NA	NA	NA	NA	NA	NA	NA	NA
CEP72	AURKB	HSPA8	SH3RF1	CIDEB	NA	NA	NA	NA	NA	NA	NA	NA	NA	NA
CHAF1A	AUTS2	HSPH1	SLAIN2	CIT	NA	NA	NA	NA	NA	NA	NA	NA	NA	NA
CHAF1B	AXL	ID4	SLC16A1	CKS1B	NA	NA	NA	NA	NA	NA	NA	NA	NA	NA
CHD7	B3GALNT1	INHBB	SLC25A32	CLN6	NA	NA	NA	NA	NA	NA	NA	NA	NA	NA
CHEK1	B3GALNT2	IQGAP1	SLC30A7	CNDP2	NA	NA	NA	NA	NA	NA	NA	NA	NA	NA
CHEK2	B3GALT1	IRX5	SLC31A1	CNKSR3	NA	NA	NA	NA	NA	NA	NA	NA	NA	NA
CHKA	B3GNT5	JUN	SLC39A9	CNOT10	NA	NA	NA	NA	NA	NA	NA	NA	NA	NA
CHRNA5	B4GALT5	KBTBD2	SLC7A2	CNOT6	NA	NA	NA	NA	NA	NA	NA	NA	NA	NA
CHTF18	B4GALT6	KCTD20	SMC1A	CNOT6L	NA	NA	NA	NA	NA	NA	NA	NA	NA	NA
CIDEB	BAALC	KHDRBS3	SNAP23	COLEC12	NA	NA	NA	NA	NA	NA	NA	NA	NA	NA
CIT	BAG1	KLF10	SON	COMMD10	NA	NA	NA	NA	NA	NA	NA	NA	NA	NA
CKS1B	BAG2	KLF11	SORD	COMMD4	NA	NA	NA	NA	NA	NA	NA	NA	NA	NA
CLN6	BANF1	KPNA1	SPRY3	COQ2	NA	NA	NA	NA	NA	NA	NA	NA	NA	NA
CNDP2	BARD1	LANCL1	SPTY2D1	COQ3	NA	NA	NA	NA	NA	NA	NA	NA	NA	NA
CNKSR3	BAZ1A	LATS2	SRSF10	CORO1A	NA	NA	NA	NA	NA	NA	NA	NA	NA	NA
CNOT10	BAZ1B	LDLR	SRSF5	CPNE2	NA	NA	NA	NA	NA	NA	NA	NA	NA	NA
CNOT6	BCCIP	LPAR4	STARD4	CPSF4	NA	NA	NA	NA	NA	NA	NA	NA	NA	NA
CNOT6L	BCL2L11	LRRC8C	STARD7	CPSF6	NA	NA	NA	NA	NA	NA	NA	NA	NA	NA
COLEC12	BCL2L12	LRRFIP1	STIP1	CPSF7	NA	NA	NA	NA	NA	NA	NA	NA	NA	NA
COMMD10	BCL3	LSG1	STXBP5	CPXM1	NA	NA	NA	NA	NA	NA	NA	NA	NA	NA
COMMD4	BCL9	LTBP1	SYNCRIP	CRISPLD1	NA	NA	NA	NA	NA	NA	NA	NA	NA	NA
COQ2	BCLAF1	LYN	TAF13	CSE1L	NA	NA	NA	NA	NA	NA	NA	NA	NA	NA
COQ3	BCS1L	MAGI2	TAF3	CTCF	NA	NA	NA	NA	NA	NA	NA	NA	NA	NA
CORO1A	BEND3	MAP1B	TANK	CTDSPL2	NA	NA	NA	NA	NA	NA	NA	NA	NA	NA
CPNE2	BEND6	MCM10	TBRG1	CTTNBP2	NA	NA	NA	NA	NA	NA	NA	NA	NA	NA
CPSF4	BHLHB9	MCM3	TCEA1	CWF19L1	NA	NA	NA	NA	NA	NA	NA	NA	NA	NA
CPSF6	BIN3	MCM4	TDG	CXCL12	NA	NA	NA	NA	NA	NA	NA	NA	NA	NA
CPSF7	BIRC5	MCM6	TES	CYB5RL	NA	NA	NA	NA	NA	NA	NA	NA	NA	NA
CPXM1	BLM	METTL2B	THUMPD1	CYP1B1	NA	NA	NA	NA	NA	NA	NA	NA	NA	NA
CRISPLD1	BLMH	MIER1	TIA1	DAZAP1	NA	NA	NA	NA	NA	NA	NA	NA	NA	NA
CSE1L	BMPR1A	MPP5	TIMP3	DBF4B	NA	NA	NA	NA	NA	NA	NA	NA	NA	NA
CTCF	BMPR1B	MSH6	TMEM39A	DCAF15	NA	NA	NA	NA	NA	NA	NA	NA	NA	NA
CTDSPL2	BNC1	MYH11	TNFSF18	DCLK2	NA	NA	NA	NA	NA	NA	NA	NA	NA	NA
CTTNBP2	BOD1	NCOA1	TOP1	DCLRE1B	NA	NA	NA	NA	NA	NA	NA	NA	NA	NA
CWF19L1	BOP1	NCOA3	TRA2A	DCLRE1C	NA	NA	NA	NA	NA	NA	NA	NA	NA	NA
CXCL12	BRCA1	NEDD9	TRA2B	DCPS	NA	NA	NA	NA	NA	NA	NA	NA	NA	NA
CYB5R2	BRCA2	NES	TTC9	DENND4B	NA	NA	NA	NA	NA	NA	NA	NA	NA	NA
CYB5RL	BRD1	NFIC	TXNRD1	DEPDC1B	NA	NA	NA	NA	NA	NA	NA	NA	NA	NA
CYP1B1	BRD2	NHLRC2	UBXN4	DET1	NA	NA	NA	NA	NA	NA	NA	NA	NA	NA
DAZAP1	BRD3	NLN	UGDH	DHFR	NA	NA	NA	NA	NA	NA	NA	NA	NA	NA
DBF4B	BRD4	NMNAT2	USO1	DHX30	NA	NA	NA	NA	NA	NA	NA	NA	NA	NA
DCAF15	BRD7	NOL10	VCPIP1	DHX33	NA	NA	NA	NA	NA	NA	NA	NA	NA	NA
DCLK2	BRD8	NR1D2	VEPH1	DHX9	NA	NA	NA	NA	NA	NA	NA	NA	NA	NA
DCLRE1B	BRD9	NR3C1	VPS35	DIRAS3	NA	NA	NA	NA	NA	NA	NA	NA	NA	NA
DCLRE1C	BRIP1	NRG3	WASF2	DIS3L	NA	NA	NA	NA	NA	NA	NA	NA	NA	NA
DCPS	BRIX1	NTM	WDR4	DLEU1	NA	NA	NA	NA	NA	NA	NA	NA	NA	NA
DENND4B	BRPF1	OR2L3	WNK1	DMC1	NA	NA	NA	NA	NA	NA	NA	NA	NA	NA
DEPDC1B	BRPF3	ORC1	WNK4	DNA2	NA	NA	NA	NA	NA	NA	NA	NA	NA	NA
DES	BTBD11	OXTR	WSB1	DNAJA4	NA	NA	NA	NA	NA	NA	NA	NA	NA	NA
DET1	BTG3	PARD3	XRN2	DNAJC9	NA	NA	NA	NA	NA	NA	NA	NA	NA	NA
DHFR	BTN3A1	PARP1	YRDC	DNMT1	NA	NA	NA	NA	NA	NA	NA	NA	NA	NA
DHX30	BTN3A2	PDCD11	ZFAND5	DOK5	NA	NA	NA	NA	NA	NA	NA	NA	NA	NA
DHX33	BUB1	PDE4D	ZFR	DOK6	NA	NA	NA	NA	NA	NA	NA	NA	NA	NA
DHX9	BUB3	PDE4DIP	ZNF175	DOLPP1	NA	NA	NA	NA	NA	NA	NA	NA	NA	NA
DIRAS3	BUD13	PDP1	ZNF398	DPF1	NA	NA	NA	NA	NA	NA	NA	NA	NA	NA
DIS3L	BUD31	PER2	ZNF431	DSC3	NA	NA	NA	NA	NA	NA	NA	NA	NA	NA
DLEU1	BYSL	PHEX	ZSWIM6	DSG2	NA	NA	NA	NA	NA	NA	NA	NA	NA	NA
DMC1	C10ORF82	PLEKHA1	NA	DSN1	NA	NA	NA	NA	NA	NA	NA	NA	NA	NA
DNA2	C11ORF49	PPRC1	NA	DTL	NA	NA	NA	NA	NA	NA	NA	NA	NA	NA
DNAJA4	C11ORF58	PRRC1	NA	DTYMK	NA	NA	NA	NA	NA	NA	NA	NA	NA	NA
DNAJC9	C12ORF45	PRRX1	NA	DUS3L	NA	NA	NA	NA	NA	NA	NA	NA	NA	NA
DNM3	C12ORF65	PSMB11	NA	DVL2	NA	NA	NA	NA	NA	NA	NA	NA	NA	NA
DNMT1	C12ORF66	PSTK	NA	E2F1	NA	NA	NA	NA	NA	NA	NA	NA	NA	NA
DOK5	C14ORF93	RAD51	NA	E2F8	NA	NA	NA	NA	NA	NA	NA	NA	NA	NA
DOK6	C15ORF41	RAPGEF2	NA	EARS2	NA	NA	NA	NA	NA	NA	NA	NA	NA	NA
DOLPP1	C17ORF53	RAPH1	NA	EBP	NA	NA	NA	NA	NA	NA	NA	NA	NA	NA
DPF1	C17ORF75	RASD1	NA	ECHDC3	NA	NA	NA	NA	NA	NA	NA	NA	NA	NA
DPPA4	C17ORF80	RBFOX3	NA	EEF1A1	NA	NA	NA	NA	NA	NA	NA	NA	NA	NA
DRD1	C17ORF97	RBM22	NA	EEFSEC	NA	NA	NA	NA	NA	NA	NA	NA	NA	NA
DSC3	C18ORF21	RBM42	NA	EFTUD2	NA	NA	NA	NA	NA	NA	NA	NA	NA	NA
DSG2	C18ORF54	RFC4	NA	EHMT2	NA	NA	NA	NA	NA	NA	NA	NA	NA	NA
DSN1	C19ORF44	RGS12	NA	ELAVL1	NA	NA	NA	NA	NA	NA	NA	NA	NA	NA
DTL	C19ORF48	RGS16	NA	ELF2	NA	NA	NA	NA	NA	NA	NA	NA	NA	NA
DTYMK	C1ORF109	RGS4	NA	EME1	NA	NA	NA	NA	NA	NA	NA	NA	NA	NA
DUS3L	C1ORF112	RHBDD1	NA	EMG1	NA	NA	NA	NA	NA	NA	NA	NA	NA	NA
DVL2	C1ORF21	RHOBTB1	NA	ENPP2	NA	NA	NA	NA	NA	NA	NA	NA	NA	NA
E2F1	C1ORF220	ROBO3	NA	EPB41	NA	NA	NA	NA	NA	NA	NA	NA	NA	NA
E2F8	C1ORF74	RRBP1	NA	ERCC8	NA	NA	NA	NA	NA	NA	NA	NA	NA	NA
EARS2	C1QBP	RRM2	NA	ERI1	NA	NA	NA	NA	NA	NA	NA	NA	NA	NA
EBP	C20ORF96	S1PR1	NA	ERI2	NA	NA	NA	NA	NA	NA	NA	NA	NA	NA
ECHDC3	C21ORF58	SAFB2	NA	ERLIN1	NA	NA	NA	NA	NA	NA	NA	NA	NA	NA
EEF1A1	C21ORF91	SCAMP1	NA	ESCO2	NA	NA	NA	NA	NA	NA	NA	NA	NA	NA
EEFSEC	C2ORF42	SCFD2	NA	ESPL1	NA	NA	NA	NA	NA	NA	NA	NA	NA	NA
EFTUD2	C2ORF69	SEC23B	NA	EXO1	NA	NA	NA	NA	NA	NA	NA	NA	NA	NA
EHMT2	C3ORF14	SECISBP2	NA	EXOSC2	NA	NA	NA	NA	NA	NA	NA	NA	NA	NA
ELAVL1	C3ORF67	SEH1L	NA	EXOSC3	NA	NA	NA	NA	NA	NA	NA	NA	NA	NA
ELF2	C4ORF33	SEL1L3	NA	EXOSC5	NA	NA	NA	NA	NA	NA	NA	NA	NA	NA
EME1	C4ORF46	SEMA6A	NA	EXOSC8	NA	NA	NA	NA	NA	NA	NA	NA	NA	NA
EMG1	C5	SERPINE1	NA	EXOSC9	NA	NA	NA	NA	NA	NA	NA	NA	NA	NA
ENDOD1	C5ORF34	SFMBT1	NA	EZH2	NA	NA	NA	NA	NA	NA	NA	NA	NA	NA
ENOX1	C7ORF26	SFRP1	NA	FAF1	NA	NA	NA	NA	NA	NA	NA	NA	NA	NA
ENPP2	C7ORF31	SFXN1	NA	FAM110B	NA	NA	NA	NA	NA	NA	NA	NA	NA	NA
EPB41	C8ORF33	SGMS2	NA	FAM111B	NA	NA	NA	NA	NA	NA	NA	NA	NA	NA
EPHA3	C8ORF48	SH3KBP1	NA	FAM129A	NA	NA	NA	NA	NA	NA	NA	NA	NA	NA
ERCC8	C8ORF59	SH3RF1	NA	FAM162B	NA	NA	NA	NA	NA	NA	NA	NA	NA	NA
ERI1	C9ORF64	SLAIN2	NA	FAM192A	NA	NA	NA	NA	NA	NA	NA	NA	NA	NA
ERI2	CA12	SLC31A1	NA	FAM49A	NA	NA	NA	NA	NA	NA	NA	NA	NA	NA
ERLIN1	CABLES2	SLFN11	NA	FAM83B	NA	NA	NA	NA	NA	NA	NA	NA	NA	NA
ESCO2	CACHD1	SMARCA4	NA	FAM83D	NA	NA	NA	NA	NA	NA	NA	NA	NA	NA
ESPL1	CACYBP	SMARCC1	NA	FANCA	NA	NA	NA	NA	NA	NA	NA	NA	NA	NA
EXO1	CAD	SMC1A	NA	FANCB	NA	NA	NA	NA	NA	NA	NA	NA	NA	NA
EXOSC2	CADPS2	SON	NA	FANCC	NA	NA	NA	NA	NA	NA	NA	NA	NA	NA
EXOSC3	CALCRL	SORD	NA	FANCD2	NA	NA	NA	NA	NA	NA	NA	NA	NA	NA
EXOSC5	CALM3	SPATA8	NA	FANCE	NA	NA	NA	NA	NA	NA	NA	NA	NA	NA
EXOSC8	CALML4	SPEN	NA	FANCG	NA	NA	NA	NA	NA	NA	NA	NA	NA	NA
EXOSC9	CAMK1G	SRRM2	NA	FANCI	NA	NA	NA	NA	NA	NA	NA	NA	NA	NA
EZH2	CAMK4	SRSF10	NA	FANCL	NA	NA	NA	NA	NA	NA	NA	NA	NA	NA
FAF1	CAMSAP1	SRSF5	NA	FASN	NA	NA	NA	NA	NA	NA	NA	NA	NA	NA
FAM110B	CARD8	SSRP1	NA	FAT3	NA	NA	NA	NA	NA	NA	NA	NA	NA	NA
FAM111B	CARM1	SSTR1	NA	FBL	NA	NA	NA	NA	NA	NA	NA	NA	NA	NA
FAM129A	CASC3	ST3GAL1	NA	FDXACB1	NA	NA	NA	NA	NA	NA	NA	NA	NA	NA
FAM13C	CASP2	STIM2	NA	FEN1	NA	NA	NA	NA	NA	NA	NA	NA	NA	NA
FAM162B	CASP6	STMN4	NA	FKBP4	NA	NA	NA	NA	NA	NA	NA	NA	NA	NA
FAM192A	CASP7	SYNCRIP	NA	FLOT1	NA	NA	NA	NA	NA	NA	NA	NA	NA	NA
FAM49A	CASP8	SYNPO	NA	FLVCR1	NA	NA	NA	NA	NA	NA	NA	NA	NA	NA
FAM83B	CASP8AP2	TAF13	NA	FOXM1	NA	NA	NA	NA	NA	NA	NA	NA	NA	NA
FAM83D	CBFB	TAF1B	NA	FOXRED1	NA	NA	NA	NA	NA	NA	NA	NA	NA	NA
FANCA	CBL	TBL1X	NA	FOXRED2	NA	NA	NA	NA	NA	NA	NA	NA	NA	NA
FANCB	CBLL1	TCF19	NA	FRZB	NA	NA	NA	NA	NA	NA	NA	NA	NA	NA
FANCC	CBR1	TES	NA	FSD1	NA	NA	NA	NA	NA	NA	NA	NA	NA	NA
FANCD2	CBX3	TFB2M	NA	FST	NA	NA	NA	NA	NA	NA	NA	NA	NA	NA
FANCE	CBX5	THSD4	NA	GABRE	NA	NA	NA	NA	NA	NA	NA	NA	NA	NA
FANCG	CC2D2A	TIMP3	NA	GALNT12	NA	NA	NA	NA	NA	NA	NA	NA	NA	NA
FANCI	CCAR1	TIPIN	NA	GAS2L3	NA	NA	NA	NA	NA	NA	NA	NA	NA	NA
FANCL	CCDC117	TLN1	NA	GATA2	NA	NA	NA	NA	NA	NA	NA	NA	NA	NA
FASN	CCDC134	TMEM209	NA	GCNT1	NA	NA	NA	NA	NA	NA	NA	NA	NA	NA
FAT3	CCDC137	TMEM43	NA	GDAP1	NA	NA	NA	NA	NA	NA	NA	NA	NA	NA
FBL	CCDC138	TNFAIP3	NA	GEMIN4	NA	NA	NA	NA	NA	NA	NA	NA	NA	NA
FDXACB1	CCDC14	TOP1	NA	GEMIN5	NA	NA	NA	NA	NA	NA	NA	NA	NA	NA
FEN1	CCDC15	TPM4	NA	GEN1	NA	NA	NA	NA	NA	NA	NA	NA	NA	NA
FGFRL1	CCDC150	TRA2A	NA	GGA2	NA	NA	NA	NA	NA	NA	NA	NA	NA	NA
FKBP4	CCDC18	TRA2B	NA	GIN1	NA	NA	NA	NA	NA	NA	NA	NA	NA	NA
FLOT1	CCDC34	TRAF6	NA	GINS1	NA	NA	NA	NA	NA	NA	NA	NA	NA	NA
FLRT3	CCDC58	TRMU	NA	GINS2	NA	NA	NA	NA	NA	NA	NA	NA	NA	NA
FLVCR1	CCDC59	TTC9	NA	GINS3	NA	NA	NA	NA	NA	NA	NA	NA	NA	NA
FOXM1	CCDC66	TWIST1	NA	GLB1L	NA	NA	NA	NA	NA	NA	NA	NA	NA	NA
FOXRED1	CCDC77	TXNRD1	NA	GLI3	NA	NA	NA	NA	NA	NA	NA	NA	NA	NA
FOXRED2	CCDC86	UBTD2	NA	GMEB1	NA	NA	NA	NA	NA	NA	NA	NA	NA	NA
FRZB	CCDC89	UGCG	NA	GMNN	NA	NA	NA	NA	NA	NA	NA	NA	NA	NA
FSD1	CCDC97	UHRF1	NA	GNE	NA	NA	NA	NA	NA	NA	NA	NA	NA	NA
FST	CCHCR1	UNG	NA	GOLM1	NA	NA	NA	NA	NA	NA	NA	NA	NA	NA
GABRE	CCNA2	USO1	NA	GPATCH4	NA	NA	NA	NA	NA	NA	NA	NA	NA	NA
GALNT12	CCNB1	USP10	NA	GPC5	NA	NA	NA	NA	NA	NA	NA	NA	NA	NA
GAS2L3	CCNB2	USP7	NA	GPC6	NA	NA	NA	NA	NA	NA	NA	NA	NA	NA
GATA2	CCNE2	UST	NA	GPHN	NA	NA	NA	NA	NA	NA	NA	NA	NA	NA
GATAD2B	CCNF	VCL	NA	GPM6B	NA	NA	NA	NA	NA	NA	NA	NA	NA	NA
GCA	CCNI	WASF2	NA	GPR87	NA	NA	NA	NA	NA	NA	NA	NA	NA	NA
GCNT1	CCNJ	WDR37	NA	GPSM2	NA	NA	NA	NA	NA	NA	NA	NA	NA	NA
GDAP1	CCNL1	WDR76	NA	GPX7	NA	NA	NA	NA	NA	NA	NA	NA	NA	NA
GEMIN4	CCNT1	WNK1	NA	GRWD1	NA	NA	NA	NA	NA	NA	NA	NA	NA	NA
GEMIN5	CCT2	WNK4	NA	GSTM5	NA	NA	NA	NA	NA	NA	NA	NA	NA	NA
GEN1	CCT4	WWC1	NA	GTF3C2	NA	NA	NA	NA	NA	NA	NA	NA	NA	NA
GGA2	CCT5	WWTR1	NA	GTF3C5	NA	NA	NA	NA	NA	NA	NA	NA	NA	NA
GIN1	CCT6A	XRN2	NA	GTSE1	NA	NA	NA	NA	NA	NA	NA	NA	NA	NA
GINS1	CCT7	XYLT1	NA	GUF1	NA	NA	NA	NA	NA	NA	NA	NA	NA	NA
GINS2	CD320	YRDC	NA	GUSB	NA	NA	NA	NA	NA	NA	NA	NA	NA	NA
GINS3	CD3EAP	ZFR	NA	H1FX	NA	NA	NA	NA	NA	NA	NA	NA	NA	NA
GLB1L	CDAN1	ZNF273	NA	H2AFV	NA	NA	NA	NA	NA	NA	NA	NA	NA	NA
GLI3	CDC20	ZNF274	NA	H2AFX	NA	NA	NA	NA	NA	NA	NA	NA	NA	NA
GMEB1	CDC23	ZNF275	NA	H2AFY2	NA	NA	NA	NA	NA	NA	NA	NA	NA	NA
GMNN	CDC25A	ZNF367	NA	H2AFZ	NA	NA	NA	NA	NA	NA	NA	NA	NA	NA
GNE	CDC25B	ZNF398	NA	H3F3B	NA	NA	NA	NA	NA	NA	NA	NA	NA	NA
GOLM1	CDC25C	ZNF431	NA	HADH	NA	NA	NA	NA	NA	NA	NA	NA	NA	NA
GPATCH4	CDC42EP1	ZNF470	NA	HAUS1	NA	NA	NA	NA	NA	NA	NA	NA	NA	NA
GPC5	CDC42EP4	ZNF480	NA	HAUS4	NA	NA	NA	NA	NA	NA	NA	NA	NA	NA
GPC6	CDC45	ZNFX1	NA	HAUS5	NA	NA	NA	NA	NA	NA	NA	NA	NA	NA
GPHN	CDC5L	ZSWIM6	NA	HAUS8	NA	NA	NA	NA	NA	NA	NA	NA	NA	NA
GPM6B	CDC6	NA	NA	HCFC1	NA	NA	NA	NA	NA	NA	NA	NA	NA	NA
GPR19	CDC7	NA	NA	HCFC1R1	NA	NA	NA	NA	NA	NA	NA	NA	NA	NA
GPR87	CDCA2	NA	NA	HDAC1	NA	NA	NA	NA	NA	NA	NA	NA	NA	NA
GPSM2	CDCA3	NA	NA	HDGF	NA	NA	NA	NA	NA	NA	NA	NA	NA	NA
GPX7	CDCA4	NA	NA	HEATR6	NA	NA	NA	NA	NA	NA	NA	NA	NA	NA
GRWD1	CDCA5	NA	NA	HELLS	NA	NA	NA	NA	NA	NA	NA	NA	NA	NA
GSTM5	CDCA7	NA	NA	HIPK2	NA	NA	NA	NA	NA	NA	NA	NA	NA	NA
GSTO2	CDCA7L	NA	NA	HIRA	NA	NA	NA	NA	NA	NA	NA	NA	NA	NA
GTF3C2	CDCA8	NA	NA	HIRIP3	NA	NA	NA	NA	NA	NA	NA	NA	NA	NA
GTF3C5	CDH24	NA	NA	HIST1H1A	NA	NA	NA	NA	NA	NA	NA	NA	NA	NA
GTSE1	CDH6	NA	NA	HIST1H1B	NA	NA	NA	NA	NA	NA	NA	NA	NA	NA
GUF1	CDK1	NA	NA	HIST1H1C	NA	NA	NA	NA	NA	NA	NA	NA	NA	NA
GUSB	CDK11A	NA	NA	HIST1H1D	NA	NA	NA	NA	NA	NA	NA	NA	NA	NA
H1FX	CDK11B	NA	NA	HIST1H1E	NA	NA	NA	NA	NA	NA	NA	NA	NA	NA
H2AFV	CDK14	NA	NA	HIST1H2AB	NA	NA	NA	NA	NA	NA	NA	NA	NA	NA
H2AFX	CDK16	NA	NA	HIST1H2AE	NA	NA	NA	NA	NA	NA	NA	NA	NA	NA
H2AFY2	CDK17	NA	NA	HIST1H2AH	NA	NA	NA	NA	NA	NA	NA	NA	NA	NA
H2AFZ	CDK2	NA	NA	HIST1H2AI	NA	NA	NA	NA	NA	NA	NA	NA	NA	NA
H3F3B	CDK4	NA	NA	HIST1H2AJ	NA	NA	NA	NA	NA	NA	NA	NA	NA	NA
HADH	CDK5RAP2	NA	NA	HIST1H2AK	NA	NA	NA	NA	NA	NA	NA	NA	NA	NA
HAUS1	CDKAL1	NA	NA	HIST1H2AL	NA	NA	NA	NA	NA	NA	NA	NA	NA	NA
HAUS4	CDKL1	NA	NA	HIST1H2AM	NA	NA	NA	NA	NA	NA	NA	NA	NA	NA
HAUS5	CDKN1B	NA	NA	HIST1H2BB	NA	NA	NA	NA	NA	NA	NA	NA	NA	NA
HAUS8	CDKN2AIP	NA	NA	HIST1H2BC	NA	NA	NA	NA	NA	NA	NA	NA	NA	NA
HCFC1	CDKN2C	NA	NA	HIST1H2BE	NA	NA	NA	NA	NA	NA	NA	NA	NA	NA
HCFC1R1	CDKN3	NA	NA	HIST1H2BF	NA	NA	NA	NA	NA	NA	NA	NA	NA	NA
HDAC1	CDO1	NA	NA	HIST1H2BG	NA	NA	NA	NA	NA	NA	NA	NA	NA	NA
HDGF	CDT1	NA	NA	HIST1H2BH	NA	NA	NA	NA	NA	NA	NA	NA	NA	NA
HEATR6	CELF1	NA	NA	HIST1H2BI	NA	NA	NA	NA	NA	NA	NA	NA	NA	NA
HELLS	CENPA	NA	NA	HIST1H2BL	NA	NA	NA	NA	NA	NA	NA	NA	NA	NA
HIPK2	CENPE	NA	NA	HIST1H2BM	NA	NA	NA	NA	NA	NA	NA	NA	NA	NA
HIRA	CENPF	NA	NA	HIST1H2BO	NA	NA	NA	NA	NA	NA	NA	NA	NA	NA
HIRIP3	CENPH	NA	NA	HIST1H3A	NA	NA	NA	NA	NA	NA	NA	NA	NA	NA
HIST1H1A	CENPI	NA	NA	HIST1H3B	NA	NA	NA	NA	NA	NA	NA	NA	NA	NA
HIST1H1B	CENPJ	NA	NA	HIST1H3C	NA	NA	NA	NA	NA	NA	NA	NA	NA	NA
HIST1H1C	CENPK	NA	NA	HIST1H3E	NA	NA	NA	NA	NA	NA	NA	NA	NA	NA
HIST1H1D	CENPL	NA	NA	HIST1H3F	NA	NA	NA	NA	NA	NA	NA	NA	NA	NA
HIST1H1E	CENPM	NA	NA	HIST1H3G	NA	NA	NA	NA	NA	NA	NA	NA	NA	NA
HIST1H2AB	CENPN	NA	NA	HIST1H3H	NA	NA	NA	NA	NA	NA	NA	NA	NA	NA
HIST1H2AE	CENPO	NA	NA	HIST1H3I	NA	NA	NA	NA	NA	NA	NA	NA	NA	NA
HIST1H2AH	CENPP	NA	NA	HIST1H3J	NA	NA	NA	NA	NA	NA	NA	NA	NA	NA
HIST1H2AI	CENPQ	NA	NA	HIST1H4A	NA	NA	NA	NA	NA	NA	NA	NA	NA	NA
HIST1H2AJ	CENPV	NA	NA	HIST1H4B	NA	NA	NA	NA	NA	NA	NA	NA	NA	NA
HIST1H2AK	CENPW	NA	NA	HIST1H4C	NA	NA	NA	NA	NA	NA	NA	NA	NA	NA
HIST1H2AL	CEP120	NA	NA	HIST1H4D	NA	NA	NA	NA	NA	NA	NA	NA	NA	NA
HIST1H2AM	CEP135	NA	NA	HIST1H4I	NA	NA	NA	NA	NA	NA	NA	NA	NA	NA
HIST1H2BB	CEP152	NA	NA	HIST1H4L	NA	NA	NA	NA	NA	NA	NA	NA	NA	NA
HIST1H2BC	CEP192	NA	NA	HIST2H2AB	NA	NA	NA	NA	NA	NA	NA	NA	NA	NA
HIST1H2BE	CEP250	NA	NA	HIST2H2AC	NA	NA	NA	NA	NA	NA	NA	NA	NA	NA
HIST1H2BF	CEP55	NA	NA	HIST3H2A	NA	NA	NA	NA	NA	NA	NA	NA	NA	NA
HIST1H2BG	CEP57	NA	NA	HIST3H2BB	NA	NA	NA	NA	NA	NA	NA	NA	NA	NA
HIST1H2BH	CEP70	NA	NA	HJURP	NA	NA	NA	NA	NA	NA	NA	NA	NA	NA
HIST1H2BI	CEP72	NA	NA	HMBS	NA	NA	NA	NA	NA	NA	NA	NA	NA	NA
HIST1H2BL	CEP76	NA	NA	HMGB2	NA	NA	NA	NA	NA	NA	NA	NA	NA	NA
HIST1H2BM	CEP78	NA	NA	HMGB3	NA	NA	NA	NA	NA	NA	NA	NA	NA	NA
HIST1H2BO	CEP97	NA	NA	HMGN1	NA	NA	NA	NA	NA	NA	NA	NA	NA	NA
HIST1H3A	CERK	NA	NA	HMGN2	NA	NA	NA	NA	NA	NA	NA	NA	NA	NA
HIST1H3B	CHAC2	NA	NA	HMGXB4	NA	NA	NA	NA	NA	NA	NA	NA	NA	NA
HIST1H3C	CHAF1A	NA	NA	HNRNPD	NA	NA	NA	NA	NA	NA	NA	NA	NA	NA
HIST1H3E	CHAF1B	NA	NA	HNRNPF	NA	NA	NA	NA	NA	NA	NA	NA	NA	NA
HIST1H3F	CHCHD2	NA	NA	HNRNPL	NA	NA	NA	NA	NA	NA	NA	NA	NA	NA
HIST1H3G	CHCHD3	NA	NA	HNRNPM	NA	NA	NA	NA	NA	NA	NA	NA	NA	NA
HIST1H3H	CHD1	NA	NA	HNRNPUL1	NA	NA	NA	NA	NA	NA	NA	NA	NA	NA
HIST1H3I	CHD1L	NA	NA	HOXA2	NA	NA	NA	NA	NA	NA	NA	NA	NA	NA
HIST1H3J	CHD3	NA	NA	HOXA3	NA	NA	NA	NA	NA	NA	NA	NA	NA	NA
HIST1H4A	CHD4	NA	NA	HOXA4	NA	NA	NA	NA	NA	NA	NA	NA	NA	NA
HIST1H4B	CHEK1	NA	NA	HOXA5	NA	NA	NA	NA	NA	NA	NA	NA	NA	NA
HIST1H4C	CHEK2	NA	NA	HOXA6	NA	NA	NA	NA	NA	NA	NA	NA	NA	NA
HIST1H4D	CHERP	NA	NA	HOXA7	NA	NA	NA	NA	NA	NA	NA	NA	NA	NA
HIST1H4I	CHKA	NA	NA	HOXC5	NA	NA	NA	NA	NA	NA	NA	NA	NA	NA
HIST1H4L	CHRAC1	NA	NA	HPDL	NA	NA	NA	NA	NA	NA	NA	NA	NA	NA
HIST2H2AB	CHRM2	NA	NA	HPS4	NA	NA	NA	NA	NA	NA	NA	NA	NA	NA
HIST2H2AC	CHRNA5	NA	NA	HSF2	NA	NA	NA	NA	NA	NA	NA	NA	NA	NA
HIST3H2A	CHTF18	NA	NA	HSPB11	NA	NA	NA	NA	NA	NA	NA	NA	NA	NA
HIST3H2BB	CIDEB	NA	NA	HSPBAP1	NA	NA	NA	NA	NA	NA	NA	NA	NA	NA
HJURP	CISD2	NA	NA	HSPD1	NA	NA	NA	NA	NA	NA	NA	NA	NA	NA
HMBS	CIT	NA	NA	HTATSF1	NA	NA	NA	NA	NA	NA	NA	NA	NA	NA
HMGB2	CKAP2	NA	NA	HYLS1	NA	NA	NA	NA	NA	NA	NA	NA	NA	NA
HMGB3	CKAP2L	NA	NA	IGSF10	NA	NA	NA	NA	NA	NA	NA	NA	NA	NA
HMGN1	CKAP5	NA	NA	IKZF4	NA	NA	NA	NA	NA	NA	NA	NA	NA	NA
HMGN2	CKS1B	NA	NA	IL18R1	NA	NA	NA	NA	NA	NA	NA	NA	NA	NA
HMGXB4	CKS2	NA	NA	IL1R1	NA	NA	NA	NA	NA	NA	NA	NA	NA	NA
HNRNPD	CLASRP	NA	NA	IL31RA	NA	NA	NA	NA	NA	NA	NA	NA	NA	NA
HNRNPF	CLDN11	NA	NA	IL6R	NA	NA	NA	NA	NA	NA	NA	NA	NA	NA
HNRNPL	CLK2	NA	NA	INTS2	NA	NA	NA	NA	NA	NA	NA	NA	NA	NA
HNRNPM	CLN6	NA	NA	INTS7	NA	NA	NA	NA	NA	NA	NA	NA	NA	NA
HNRNPUL1	CLNS1A	NA	NA	IPO4	NA	NA	NA	NA	NA	NA	NA	NA	NA	NA
HOXA2	CLPB	NA	NA	IPO9	NA	NA	NA	NA	NA	NA	NA	NA	NA	NA
HOXA3	CLSPN	NA	NA	IQCC	NA	NA	NA	NA	NA	NA	NA	NA	NA	NA
HOXA4	CLUAP1	NA	NA	IQGAP3	NA	NA	NA	NA	NA	NA	NA	NA	NA	NA
HOXA5	CMC1	NA	NA	IRAK3	NA	NA	NA	NA	NA	NA	NA	NA	NA	NA
HOXA6	CNBP	NA	NA	ISLR	NA	NA	NA	NA	NA	NA	NA	NA	NA	NA
HOXA7	CNDP2	NA	NA	ITGB3BP	NA	NA	NA	NA	NA	NA	NA	NA	NA	NA
HOXB8	CNKSR3	NA	NA	KAT5	NA	NA	NA	NA	NA	NA	NA	NA	NA	NA
HOXC5	CNOT1	NA	NA	KCNE4	NA	NA	NA	NA	NA	NA	NA	NA	NA	NA
HPDL	CNOT10	NA	NA	KCNIP3	NA	NA	NA	NA	NA	NA	NA	NA	NA	NA
HPS4	CNOT3	NA	NA	KHDRBS1	NA	NA	NA	NA	NA	NA	NA	NA	NA	NA
HSF2	CNOT6	NA	NA	KHK	NA	NA	NA	NA	NA	NA	NA	NA	NA	NA
HSPB11	CNOT6L	NA	NA	KHSRP	NA	NA	NA	NA	NA	NA	NA	NA	NA	NA
HSPBAP1	CNOT7	NA	NA	KIAA0586	NA	NA	NA	NA	NA	NA	NA	NA	NA	NA
HSPD1	CNRIP1	NA	NA	KIF11	NA	NA	NA	NA	NA	NA	NA	NA	NA	NA
HTATSF1	CNTLN	NA	NA	KIF15	NA	NA	NA	NA	NA	NA	NA	NA	NA	NA
HYLS1	CNTROB	NA	NA	KIF18B	NA	NA	NA	NA	NA	NA	NA	NA	NA	NA
IGSF10	COASY	NA	NA	KIF20A	NA	NA	NA	NA	NA	NA	NA	NA	NA	NA
IKZF4	COG7	NA	NA	KIF22	NA	NA	NA	NA	NA	NA	NA	NA	NA	NA
IL18R1	COIL	NA	NA	KIF24	NA	NA	NA	NA	NA	NA	NA	NA	NA	NA
IL1R1	COL12A1	NA	NA	KIF2C	NA	NA	NA	NA	NA	NA	NA	NA	NA	NA
IL31RA	COL6A3	NA	NA	KIF4A	NA	NA	NA	NA	NA	NA	NA	NA	NA	NA
IL6R	COLEC12	NA	NA	KIFC1	NA	NA	NA	NA	NA	NA	NA	NA	NA	NA
INTS2	COMMD10	NA	NA	KLF3	NA	NA	NA	NA	NA	NA	NA	NA	NA	NA
INTS7	COMMD4	NA	NA	KNTC1	NA	NA	NA	NA	NA	NA	NA	NA	NA	NA
IPO4	COQ2	NA	NA	KRT19	NA	NA	NA	NA	NA	NA	NA	NA	NA	NA
IPO9	COQ3	NA	NA	KRT7	NA	NA	NA	NA	NA	NA	NA	NA	NA	NA
IQCC	COQ7	NA	NA	L2HGDH	NA	NA	NA	NA	NA	NA	NA	NA	NA	NA
IQGAP3	CORO1A	NA	NA	LAS1L	NA	NA	NA	NA	NA	NA	NA	NA	NA	NA
IRAK3	COX10	NA	NA	LBR	NA	NA	NA	NA	NA	NA	NA	NA	NA	NA
ISLR	COX18	NA	NA	LCMT2	NA	NA	NA	NA	NA	NA	NA	NA	NA	NA
ITGB3BP	CPEB1	NA	NA	LDHB	NA	NA	NA	NA	NA	NA	NA	NA	NA	NA
IVNS1ABP	CPNE2	NA	NA	LIAS	NA	NA	NA	NA	NA	NA	NA	NA	NA	NA
KALRN	CPS1	NA	NA	LIFR	NA	NA	NA	NA	NA	NA	NA	NA	NA	NA
KAT5	CPSF2	NA	NA	LIG1	NA	NA	NA	NA	NA	NA	NA	NA	NA	NA
KCNE4	CPSF3	NA	NA	LIG3	NA	NA	NA	NA	NA	NA	NA	NA	NA	NA
KCNH5	CPSF4	NA	NA	LIN52	NA	NA	NA	NA	NA	NA	NA	NA	NA	NA
KCNIP3	CPSF6	NA	NA	LIN9	NA	NA	NA	NA	NA	NA	NA	NA	NA	NA
KCTD12	CPSF7	NA	NA	LMNB1	NA	NA	NA	NA	NA	NA	NA	NA	NA	NA
KHDRBS1	CPXM1	NA	NA	LMNB2	NA	NA	NA	NA	NA	NA	NA	NA	NA	NA
KHK	CRABP2	NA	NA	LMO4	NA	NA	NA	NA	NA	NA	NA	NA	NA	NA
KHSRP	CREB1	NA	NA	LONRF1	NA	NA	NA	NA	NA	NA	NA	NA	NA	NA
KIAA0586	CREB3L2	NA	NA	LRRC49	NA	NA	NA	NA	NA	NA	NA	NA	NA	NA
KIF11	CREBBP	NA	NA	LRRC61	NA	NA	NA	NA	NA	NA	NA	NA	NA	NA
KIF15	CREBZF	NA	NA	LRRC8B	NA	NA	NA	NA	NA	NA	NA	NA	NA	NA
KIF18B	CRISPLD1	NA	NA	LRRCC1	NA	NA	NA	NA	NA	NA	NA	NA	NA	NA
KIF20A	CRNKL1	NA	NA	LRRN1	NA	NA	NA	NA	NA	NA	NA	NA	NA	NA
KIF21A	CROT	NA	NA	LSM2	NA	NA	NA	NA	NA	NA	NA	NA	NA	NA
KIF22	CS	NA	NA	MAB21L2	NA	NA	NA	NA	NA	NA	NA	NA	NA	NA
KIF24	CSE1L	NA	NA	MAD2L1	NA	NA	NA	NA	NA	NA	NA	NA	NA	NA
KIF2C	CSNK2A2	NA	NA	MAD2L2	NA	NA	NA	NA	NA	NA	NA	NA	NA	NA
KIF4A	CSTF1	NA	NA	MAOB	NA	NA	NA	NA	NA	NA	NA	NA	NA	NA
KIFC1	CSTF2	NA	NA	MAP2K6	NA	NA	NA	NA	NA	NA	NA	NA	NA	NA
KLF3	CSTF2T	NA	NA	MAT2B	NA	NA	NA	NA	NA	NA	NA	NA	NA	NA
KNTC1	CTBP1	NA	NA	MBNL3	NA	NA	NA	NA	NA	NA	NA	NA	NA	NA
KRT19	CTBP2	NA	NA	MBOAT1	NA	NA	NA	NA	NA	NA	NA	NA	NA	NA
KRT7	CTCF	NA	NA	MCM10	NA	NA	NA	NA	NA	NA	NA	NA	NA	NA
L2HGDH	CTDNEP1	NA	NA	MCM2	NA	NA	NA	NA	NA	NA	NA	NA	NA	NA
LAS1L	CTDSP2	NA	NA	MCM3	NA	NA	NA	NA	NA	NA	NA	NA	NA	NA
LBR	CTDSPL2	NA	NA	MCM4	NA	NA	NA	NA	NA	NA	NA	NA	NA	NA
LCMT2	CTNNAL1	NA	NA	MCM5	NA	NA	NA	NA	NA	NA	NA	NA	NA	NA
LDHB	CTNNBL1	NA	NA	MCM6	NA	NA	NA	NA	NA	NA	NA	NA	NA	NA
LIAS	CTPS2	NA	NA	MCM7	NA	NA	NA	NA	NA	NA	NA	NA	NA	NA
LIFR	CTSC	NA	NA	MCM8	NA	NA	NA	NA	NA	NA	NA	NA	NA	NA
LIG1	CTTNBP2	NA	NA	MCRS1	NA	NA	NA	NA	NA	NA	NA	NA	NA	NA
LIG3	CUL1	NA	NA	MDC1	NA	NA	NA	NA	NA	NA	NA	NA	NA	NA
LIN52	CUTC	NA	NA	MDK	NA	NA	NA	NA	NA	NA	NA	NA	NA	NA
LIN9	CWC22	NA	NA	MDN1	NA	NA	NA	NA	NA	NA	NA	NA	NA	NA
LMNB1	CWC25	NA	NA	MED1	NA	NA	NA	NA	NA	NA	NA	NA	NA	NA
LMNB2	CWC27	NA	NA	MID1	NA	NA	NA	NA	NA	NA	NA	NA	NA	NA
LMO4	CWF19L1	NA	NA	MID2	NA	NA	NA	NA	NA	NA	NA	NA	NA	NA
LONRF1	CWF19L2	NA	NA	MIS12	NA	NA	NA	NA	NA	NA	NA	NA	NA	NA
LRRC49	CXCL12	NA	NA	MKI67	NA	NA	NA	NA	NA	NA	NA	NA	NA	NA
LRRC61	CXXC1	NA	NA	MKS1	NA	NA	NA	NA	NA	NA	NA	NA	NA	NA
LRRC8B	CYB5RL	NA	NA	MLH1	NA	NA	NA	NA	NA	NA	NA	NA	NA	NA
LRRCC1	CYP1B1	NA	NA	MLPH	NA	NA	NA	NA	NA	NA	NA	NA	NA	NA
LRRN1	DARS	NA	NA	MMACHC	NA	NA	NA	NA	NA	NA	NA	NA	NA	NA
LSM2	DARS2	NA	NA	MND1	NA	NA	NA	NA	NA	NA	NA	NA	NA	NA
MAB21L2	DAZAP1	NA	NA	MNS1	NA	NA	NA	NA	NA	NA	NA	NA	NA	NA
MAD2L1	DAZAP2	NA	NA	MRPL48	NA	NA	NA	NA	NA	NA	NA	NA	NA	NA
MAD2L2	DBF4	NA	NA	MRPL9	NA	NA	NA	NA	NA	NA	NA	NA	NA	NA
MAOA	DBF4B	NA	NA	MRPS27	NA	NA	NA	NA	NA	NA	NA	NA	NA	NA
MAOB	DBI	NA	NA	MRPS31	NA	NA	NA	NA	NA	NA	NA	NA	NA	NA
MAP2K6	DCAF12	NA	NA	MRRF	NA	NA	NA	NA	NA	NA	NA	NA	NA	NA
MAT2B	DCAF15	NA	NA	MRTO4	NA	NA	NA	NA	NA	NA	NA	NA	NA	NA
MBD4	DCAF16	NA	NA	MSH2	NA	NA	NA	NA	NA	NA	NA	NA	NA	NA
MBNL3	DCAF17	NA	NA	MSH6	NA	NA	NA	NA	NA	NA	NA	NA	NA	NA
MBOAT1	DCLK2	NA	NA	MT1A	NA	NA	NA	NA	NA	NA	NA	NA	NA	NA
MBOAT2	DCLRE1A	NA	NA	MTA2	NA	NA	NA	NA	NA	NA	NA	NA	NA	NA
MCM10	DCLRE1B	NA	NA	MTHFD1	NA	NA	NA	NA	NA	NA	NA	NA	NA	NA
MCM2	DCLRE1C	NA	NA	MTMR4	NA	NA	NA	NA	NA	NA	NA	NA	NA	NA
MCM3	DCP2	NA	NA	MXD3	NA	NA	NA	NA	NA	NA	NA	NA	NA	NA
MCM4	DCPS	NA	NA	MYBL2	NA	NA	NA	NA	NA	NA	NA	NA	NA	NA
MCM5	DCUN1D5	NA	NA	MYO19	NA	NA	NA	NA	NA	NA	NA	NA	NA	NA
MCM6	DDX10	NA	NA	MYPN	NA	NA	NA	NA	NA	NA	NA	NA	NA	NA
MCM7	DDX17	NA	NA	NARS2	NA	NA	NA	NA	NA	NA	NA	NA	NA	NA
MCM8	DDX18	NA	NA	NASP	NA	NA	NA	NA	NA	NA	NA	NA	NA	NA
MCRS1	DDX21	NA	NA	NAT10	NA	NA	NA	NA	NA	NA	NA	NA	NA	NA
MDC1	DDX23	NA	NA	NCAPD2	NA	NA	NA	NA	NA	NA	NA	NA	NA	NA
MDGA1	DDX27	NA	NA	NCAPD3	NA	NA	NA	NA	NA	NA	NA	NA	NA	NA
MDK	DDX31	NA	NA	NCAPG2	NA	NA	NA	NA	NA	NA	NA	NA	NA	NA
MDN1	DDX46	NA	NA	NCAPH	NA	NA	NA	NA	NA	NA	NA	NA	NA	NA
MED1	DDX54	NA	NA	NCOA5	NA	NA	NA	NA	NA	NA	NA	NA	NA	NA
MED12L	DDX55	NA	NA	NDC80	NA	NA	NA	NA	NA	NA	NA	NA	NA	NA
MID1	DDX56	NA	NA	NDE1	NA	NA	NA	NA	NA	NA	NA	NA	NA	NA
MID2	DDX60	NA	NA	NDP	NA	NA	NA	NA	NA	NA	NA	NA	NA	NA
MIS12	DEK	NA	NA	NEFH	NA	NA	NA	NA	NA	NA	NA	NA	NA	NA
MKI67	DENND1B	NA	NA	NEIL3	NA	NA	NA	NA	NA	NA	NA	NA	NA	NA
MKS1	DENND4B	NA	NA	NEK2	NA	NA	NA	NA	NA	NA	NA	NA	NA	NA
MLH1	DEPDC1	NA	NA	NETO2	NA	NA	NA	NA	NA	NA	NA	NA	NA	NA
MLPH	DEPDC1B	NA	NA	NFIA	NA	NA	NA	NA	NA	NA	NA	NA	NA	NA
MMACHC	DEPDC4	NA	NA	NFIB	NA	NA	NA	NA	NA	NA	NA	NA	NA	NA
MND1	DEPDC5	NA	NA	NFYA	NA	NA	NA	NA	NA	NA	NA	NA	NA	NA
MNS1	DERA	NA	NA	NHEJ1	NA	NA	NA	NA	NA	NA	NA	NA	NA	NA
MRPL48	DET1	NA	NA	NHP2	NA	NA	NA	NA	NA	NA	NA	NA	NA	NA
MRPL9	DGKD	NA	NA	NIF3L1	NA	NA	NA	NA	NA	NA	NA	NA	NA	NA
MRPS27	DHFR	NA	NA	NNAT	NA	NA	NA	NA	NA	NA	NA	NA	NA	NA
MRPS31	DHODH	NA	NA	NOC4L	NA	NA	NA	NA	NA	NA	NA	NA	NA	NA
MRRF	DHPS	NA	NA	NOD1	NA	NA	NA	NA	NA	NA	NA	NA	NA	NA
MRTO4	DHX15	NA	NA	NOL12	NA	NA	NA	NA	NA	NA	NA	NA	NA	NA
MSH2	DHX30	NA	NA	NOL9	NA	NA	NA	NA	NA	NA	NA	NA	NA	NA
MSH6	DHX33	NA	NA	NOLC1	NA	NA	NA	NA	NA	NA	NA	NA	NA	NA
MT1A	DHX35	NA	NA	NONO	NA	NA	NA	NA	NA	NA	NA	NA	NA	NA
MTA2	DHX36	NA	NA	NOV	NA	NA	NA	NA	NA	NA	NA	NA	NA	NA
MTHFD1	DHX37	NA	NA	NOVA1	NA	NA	NA	NA	NA	NA	NA	NA	NA	NA
MTMR4	DHX38	NA	NA	NPRL3	NA	NA	NA	NA	NA	NA	NA	NA	NA	NA
MXD3	DHX57	NA	NA	NQO1	NA	NA	NA	NA	NA	NA	NA	NA	NA	NA
MYBL2	DHX8	NA	NA	NQO2	NA	NA	NA	NA	NA	NA	NA	NA	NA	NA
MYO19	DHX9	NA	NA	NR2C2AP	NA	NA	NA	NA	NA	NA	NA	NA	NA	NA
MYPN	DIAPH3	NA	NA	NR2F1	NA	NA	NA	NA	NA	NA	NA	NA	NA	NA
NAP1L3	DIDO1	NA	NA	NRM	NA	NA	NA	NA	NA	NA	NA	NA	NA	NA
NARS2	DIRAS3	NA	NA	NRP1	NA	NA	NA	NA	NA	NA	NA	NA	NA	NA
NASP	DIS3L	NA	NA	NSL1	NA	NA	NA	NA	NA	NA	NA	NA	NA	NA
NAT10	DIS3L2	NA	NA	NSMCE4A	NA	NA	NA	NA	NA	NA	NA	NA	NA	NA
NCAPD2	DKC1	NA	NA	NUDT21	NA	NA	NA	NA	NA	NA	NA	NA	NA	NA
NCAPD3	DLEU1	NA	NA	NUF2	NA	NA	NA	NA	NA	NA	NA	NA	NA	NA
NCAPG2	DLG3	NA	NA	NUP107	NA	NA	NA	NA	NA	NA	NA	NA	NA	NA
NCAPH	DLGAP5	NA	NA	NUP133	NA	NA	NA	NA	NA	NA	NA	NA	NA	NA
NCOA5	DMC1	NA	NA	NUP205	NA	NA	NA	NA	NA	NA	NA	NA	NA	NA
NDC80	DNA2	NA	NA	NUP214	NA	NA	NA	NA	NA	NA	NA	NA	NA	NA
NDE1	DNAJA4	NA	NA	NUP35	NA	NA	NA	NA	NA	NA	NA	NA	NA	NA
NDP	DNAJC14	NA	NA	NUP85	NA	NA	NA	NA	NA	NA	NA	NA	NA	NA
NEFH	DNAJC2	NA	NA	NUP88	NA	NA	NA	NA	NA	NA	NA	NA	NA	NA
NEIL3	DNAJC22	NA	NA	NUP93	NA	NA	NA	NA	NA	NA	NA	NA	NA	NA
NEK2	DNAJC9	NA	NA	NUSAP1	NA	NA	NA	NA	NA	NA	NA	NA	NA	NA
NETO2	DNALI1	NA	NA	NXT2	NA	NA	NA	NA	NA	NA	NA	NA	NA	NA
NFIA	DNMT1	NA	NA	OAS3	NA	NA	NA	NA	NA	NA	NA	NA	NA	NA
NFIB	DNMT3A	NA	NA	ODC1	NA	NA	NA	NA	NA	NA	NA	NA	NA	NA
NFYA	DNMT3B	NA	NA	OIP5	NA	NA	NA	NA	NA	NA	NA	NA	NA	NA
NHEJ1	DNTTIP2	NA	NA	OLFML2B	NA	NA	NA	NA	NA	NA	NA	NA	NA	NA
NHP2	DOCK10	NA	NA	ORC1	NA	NA	NA	NA	NA	NA	NA	NA	NA	NA
NIF3L1	DOCK11	NA	NA	OSGEPL1	NA	NA	NA	NA	NA	NA	NA	NA	NA	NA
NNAT	DOK5	NA	NA	OXNAD1	NA	NA	NA	NA	NA	NA	NA	NA	NA	NA
NOC4L	DOK6	NA	NA	PA2G4	NA	NA	NA	NA	NA	NA	NA	NA	NA	NA
NOD1	DOLPP1	NA	NA	PAFAH1B3	NA	NA	NA	NA	NA	NA	NA	NA	NA	NA
NOL12	DONSON	NA	NA	PAICS	NA	NA	NA	NA	NA	NA	NA	NA	NA	NA
NOL9	DOT1L	NA	NA	PAK3	NA	NA	NA	NA	NA	NA	NA	NA	NA	NA
NOLC1	DPF1	NA	NA	PARP1	NA	NA	NA	NA	NA	NA	NA	NA	NA	NA
NONO	DPF3	NA	NA	PASK	NA	NA	NA	NA	NA	NA	NA	NA	NA	NA
NOV	DPH5	NA	NA	PATZ1	NA	NA	NA	NA	NA	NA	NA	NA	NA	NA
NOVA1	DPYD	NA	NA	PAXIP1	NA	NA	NA	NA	NA	NA	NA	NA	NA	NA
NPRL3	DPYSL3	NA	NA	PBK	NA	NA	NA	NA	NA	NA	NA	NA	NA	NA
NQO1	DROSHA	NA	NA	PCIF1	NA	NA	NA	NA	NA	NA	NA	NA	NA	NA
NQO2	DSC3	NA	NA	PCNT	NA	NA	NA	NA	NA	NA	NA	NA	NA	NA
NR2C2AP	DSCC1	NA	NA	PDE3B	NA	NA	NA	NA	NA	NA	NA	NA	NA	NA
NR2F1	DSEL	NA	NA	PDGFRA	NA	NA	NA	NA	NA	NA	NA	NA	NA	NA
NRM	DSG2	NA	NA	PEG10	NA	NA	NA	NA	NA	NA	NA	NA	NA	NA
NRP1	DSN1	NA	NA	PELI2	NA	NA	NA	NA	NA	NA	NA	NA	NA	NA
NSL1	DSTYK	NA	NA	PFAS	NA	NA	NA	NA	NA	NA	NA	NA	NA	NA
NSMCE4A	DTL	NA	NA	PGD	NA	NA	NA	NA	NA	NA	NA	NA	NA	NA
NTNG1	DTYMK	NA	NA	PHB2	NA	NA	NA	NA	NA	NA	NA	NA	NA	NA
NUDT21	DUS1L	NA	NA	PHC1	NA	NA	NA	NA	NA	NA	NA	NA	NA	NA
NUF2	DUS3L	NA	NA	PHF14	NA	NA	NA	NA	NA	NA	NA	NA	NA	NA
NUP107	DUS4L	NA	NA	PHF19	NA	NA	NA	NA	NA	NA	NA	NA	NA	NA
NUP133	DUSP12	NA	NA	PHF2	NA	NA	NA	NA	NA	NA	NA	NA	NA	NA
NUP205	DUSP18	NA	NA	PHF3	NA	NA	NA	NA	NA	NA	NA	NA	NA	NA
NUP214	DUT	NA	NA	PHF5A	NA	NA	NA	NA	NA	NA	NA	NA	NA	NA
NUP35	DVL2	NA	NA	PHF7	NA	NA	NA	NA	NA	NA	NA	NA	NA	NA
NUP85	DYNC2H1	NA	NA	PHIP	NA	NA	NA	NA	NA	NA	NA	NA	NA	NA
NUP88	DYRK1A	NA	NA	PIGX	NA	NA	NA	NA	NA	NA	NA	NA	NA	NA
NUP93	DZIP3	NA	NA	PINX1	NA	NA	NA	NA	NA	NA	NA	NA	NA	NA
NUSAP1	E2F1	NA	NA	PKDCC	NA	NA	NA	NA	NA	NA	NA	NA	NA	NA
NXT2	E2F3	NA	NA	PKMYT1	NA	NA	NA	NA	NA	NA	NA	NA	NA	NA
OAS3	E2F4	NA	NA	PKN3	NA	NA	NA	NA	NA	NA	NA	NA	NA	NA
ODC1	E2F5	NA	NA	PLCB1	NA	NA	NA	NA	NA	NA	NA	NA	NA	NA
OIP5	E2F6	NA	NA	PLEKHG4B	NA	NA	NA	NA	NA	NA	NA	NA	NA	NA
OLFML2B	E2F8	NA	NA	PLK1	NA	NA	NA	NA	NA	NA	NA	NA	NA	NA
ORC1	EARS2	NA	NA	PLK4	NA	NA	NA	NA	NA	NA	NA	NA	NA	NA
OSGEPL1	EBAG9	NA	NA	PLSCR1	NA	NA	NA	NA	NA	NA	NA	NA	NA	NA
OXNAD1	EBNA1BP2	NA	NA	POC1A	NA	NA	NA	NA	NA	NA	NA	NA	NA	NA
PA2G4	EBP	NA	NA	POGZ	NA	NA	NA	NA	NA	NA	NA	NA	NA	NA
PAFAH1B3	ECD	NA	NA	POLA1	NA	NA	NA	NA	NA	NA	NA	NA	NA	NA
PAICS	ECHDC3	NA	NA	POLA2	NA	NA	NA	NA	NA	NA	NA	NA	NA	NA
PAK3	ECSIT	NA	NA	POLD1	NA	NA	NA	NA	NA	NA	NA	NA	NA	NA
PARP1	ECT2	NA	NA	POLD2	NA	NA	NA	NA	NA	NA	NA	NA	NA	NA
PASK	EDC3	NA	NA	POLD3	NA	NA	NA	NA	NA	NA	NA	NA	NA	NA
PATZ1	EEF1A1	NA	NA	POLE	NA	NA	NA	NA	NA	NA	NA	NA	NA	NA
PAXIP1	EEF1D	NA	NA	POLE2	NA	NA	NA	NA	NA	NA	NA	NA	NA	NA
PBK	EEFSEC	NA	NA	POLR1A	NA	NA	NA	NA	NA	NA	NA	NA	NA	NA
PCDH10	EEPD1	NA	NA	POLR1B	NA	NA	NA	NA	NA	NA	NA	NA	NA	NA
PCIF1	EFCAB2	NA	NA	POP7	NA	NA	NA	NA	NA	NA	NA	NA	NA	NA
PCNT	EFCAB7	NA	NA	PPIH	NA	NA	NA	NA	NA	NA	NA	NA	NA	NA
PDE3B	EFHD2	NA	NA	PPIL1	NA	NA	NA	NA	NA	NA	NA	NA	NA	NA
PDGFRA	EFNA4	NA	NA	PPP2R5D	NA	NA	NA	NA	NA	NA	NA	NA	NA	NA
PDK3	EFS	NA	NA	PRC1	NA	NA	NA	NA	NA	NA	NA	NA	NA	NA
PEG10	EFTUD2	NA	NA	PRDM6	NA	NA	NA	NA	NA	NA	NA	NA	NA	NA
PELI2	EGR1	NA	NA	PRIM1	NA	NA	NA	NA	NA	NA	NA	NA	NA	NA
PFAS	EGR3	NA	NA	PRKAR2B	NA	NA	NA	NA	NA	NA	NA	NA	NA	NA
PFDN4	EHMT1	NA	NA	PRKDC	NA	NA	NA	NA	NA	NA	NA	NA	NA	NA
PGAM5	EHMT2	NA	NA	PRMT1	NA	NA	NA	NA	NA	NA	NA	NA	NA	NA
PGD	EIF1AD	NA	NA	PRMT3	NA	NA	NA	NA	NA	NA	NA	NA	NA	NA
PHB2	EIF2A	NA	NA	PRPF19	NA	NA	NA	NA	NA	NA	NA	NA	NA	NA
PHC1	EIF2B1	NA	NA	PRPF4	NA	NA	NA	NA	NA	NA	NA	NA	NA	NA
PHF14	EIF2B2	NA	NA	PRPF8	NA	NA	NA	NA	NA	NA	NA	NA	NA	NA
PHF19	EIF2B5	NA	NA	PRPS2	NA	NA	NA	NA	NA	NA	NA	NA	NA	NA
PHF2	EIF3D	NA	NA	PRR3	NA	NA	NA	NA	NA	NA	NA	NA	NA	NA
PHF3	EIF3E	NA	NA	PRTFDC1	NA	NA	NA	NA	NA	NA	NA	NA	NA	NA
PHF5A	EIF3L	NA	NA	PSD3	NA	NA	NA	NA	NA	NA	NA	NA	NA	NA
PHF7	EIF4B	NA	NA	PSIP1	NA	NA	NA	NA	NA	NA	NA	NA	NA	NA
PHIP	EIF4EBP1	NA	NA	PSRC1	NA	NA	NA	NA	NA	NA	NA	NA	NA	NA
PID1	EIF5	NA	NA	PTBP1	NA	NA	NA	NA	NA	NA	NA	NA	NA	NA
PIGX	ELAVL1	NA	NA	PTBP2	NA	NA	NA	NA	NA	NA	NA	NA	NA	NA
PINX1	ELF2	NA	NA	PTCH2	NA	NA	NA	NA	NA	NA	NA	NA	NA	NA
PITX2	ELF4	NA	NA	PTGER2	NA	NA	NA	NA	NA	NA	NA	NA	NA	NA
PIWIL2	ELOVL2	NA	NA	PTMA	NA	NA	NA	NA	NA	NA	NA	NA	NA	NA
PKDCC	ELOVL5	NA	NA	PTN	NA	NA	NA	NA	NA	NA	NA	NA	NA	NA
PKMYT1	ELP3	NA	NA	PTPN18	NA	NA	NA	NA	NA	NA	NA	NA	NA	NA
PKN3	ELP4	NA	NA	PTPRN	NA	NA	NA	NA	NA	NA	NA	NA	NA	NA
PKNOX2	EMD	NA	NA	PXMP4	NA	NA	NA	NA	NA	NA	NA	NA	NA	NA
PLCB1	EME1	NA	NA	PYGO1	NA	NA	NA	NA	NA	NA	NA	NA	NA	NA
PLEKHG4B	EMG1	NA	NA	PYGO2	NA	NA	NA	NA	NA	NA	NA	NA	NA	NA
PLK1	EML1	NA	NA	QRSL1	NA	NA	NA	NA	NA	NA	NA	NA	NA	NA
PLK4	EML4	NA	NA	QSER1	NA	NA	NA	NA	NA	NA	NA	NA	NA	NA
PLSCR1	EML5	NA	NA	R3HDM1	NA	NA	NA	NA	NA	NA	NA	NA	NA	NA
POC1A	EMP2	NA	NA	RACGAP1	NA	NA	NA	NA	NA	NA	NA	NA	NA	NA
POGZ	ENOPH1	NA	NA	RAD51	NA	NA	NA	NA	NA	NA	NA	NA	NA	NA
POLA1	ENOSF1	NA	NA	RAD51AP1	NA	NA	NA	NA	NA	NA	NA	NA	NA	NA
POLA2	ENOX2	NA	NA	RAD51C	NA	NA	NA	NA	NA	NA	NA	NA	NA	NA
POLD1	ENPP1	NA	NA	RAD54L	NA	NA	NA	NA	NA	NA	NA	NA	NA	NA
POLD2	ENPP2	NA	NA	RAE1	NA	NA	NA	NA	NA	NA	NA	NA	NA	NA
POLD3	ENSA	NA	NA	RALGPS2	NA	NA	NA	NA	NA	NA	NA	NA	NA	NA
POLE	ENTPD6	NA	NA	RANBP1	NA	NA	NA	NA	NA	NA	NA	NA	NA	NA
POLE2	ENY2	NA	NA	RBBP4	NA	NA	NA	NA	NA	NA	NA	NA	NA	NA
POLR1A	EP300	NA	NA	RBBP7	NA	NA	NA	NA	NA	NA	NA	NA	NA	NA
POLR1B	EP400	NA	NA	RBBP8	NA	NA	NA	NA	NA	NA	NA	NA	NA	NA
POP7	EPB41	NA	NA	RBM14	NA	NA	NA	NA	NA	NA	NA	NA	NA	NA
PPIH	EPHB4	NA	NA	RBM23	NA	NA	NA	NA	NA	NA	NA	NA	NA	NA
PPIL1	EPS8	NA	NA	RBM26	NA	NA	NA	NA	NA	NA	NA	NA	NA	NA
PPP2R5D	ERAL1	NA	NA	RCL1	NA	NA	NA	NA	NA	NA	NA	NA	NA	NA
PRC1	ERAP1	NA	NA	RECQL4	NA	NA	NA	NA	NA	NA	NA	NA	NA	NA
PRDM6	ERCC3	NA	NA	REEP4	NA	NA	NA	NA	NA	NA	NA	NA	NA	NA
PRIM1	ERCC4	NA	NA	RELN	NA	NA	NA	NA	NA	NA	NA	NA	NA	NA
PRKAR2B	ERCC6L	NA	NA	RFC2	NA	NA	NA	NA	NA	NA	NA	NA	NA	NA
PRKDC	ERCC8	NA	NA	RFC3	NA	NA	NA	NA	NA	NA	NA	NA	NA	NA
PRMT1	ERH	NA	NA	RFC4	NA	NA	NA	NA	NA	NA	NA	NA	NA	NA
PRMT3	ERI1	NA	NA	RFC5	NA	NA	NA	NA	NA	NA	NA	NA	NA	NA
PRPF19	ERI2	NA	NA	RFT1	NA	NA	NA	NA	NA	NA	NA	NA	NA	NA
PRPF4	ERI3	NA	NA	RFWD3	NA	NA	NA	NA	NA	NA	NA	NA	NA	NA
PRPF8	ERLIN1	NA	NA	RGS17	NA	NA	NA	NA	NA	NA	NA	NA	NA	NA
PRPS2	ESCO2	NA	NA	RIBC2	NA	NA	NA	NA	NA	NA	NA	NA	NA	NA
PRR3	ESF1	NA	NA	RIN1	NA	NA	NA	NA	NA	NA	NA	NA	NA	NA
PRTFDC1	ESPL1	NA	NA	RMI1	NA	NA	NA	NA	NA	NA	NA	NA	NA	NA
PRUNE2	ETAA1	NA	NA	RNASEH2A	NA	NA	NA	NA	NA	NA	NA	NA	NA	NA
PSD3	ETS2	NA	NA	RNASEH2B	NA	NA	NA	NA	NA	NA	NA	NA	NA	NA
PSIP1	EVI2B	NA	NA	RNF214	NA	NA	NA	NA	NA	NA	NA	NA	NA	NA
PSRC1	EWSR1	NA	NA	RNF26	NA	NA	NA	NA	NA	NA	NA	NA	NA	NA
PTBP1	EXO1	NA	NA	RNFT2	NA	NA	NA	NA	NA	NA	NA	NA	NA	NA
PTBP2	EXOG	NA	NA	ROR2	NA	NA	NA	NA	NA	NA	NA	NA	NA	NA
PTCH2	EXOSC10	NA	NA	RPA2	NA	NA	NA	NA	NA	NA	NA	NA	NA	NA
PTGER2	EXOSC2	NA	NA	RPA3	NA	NA	NA	NA	NA	NA	NA	NA	NA	NA
PTGFRN	EXOSC3	NA	NA	RPL39L	NA	NA	NA	NA	NA	NA	NA	NA	NA	NA
PTMA	EXOSC5	NA	NA	RPP25	NA	NA	NA	NA	NA	NA	NA	NA	NA	NA
PTN	EXOSC8	NA	NA	RPP30	NA	NA	NA	NA	NA	NA	NA	NA	NA	NA
PTPN18	EXOSC9	NA	NA	RPS6KA5	NA	NA	NA	NA	NA	NA	NA	NA	NA	NA
PTPN3	EYA2	NA	NA	RPUSD4	NA	NA	NA	NA	NA	NA	NA	NA	NA	NA
PTPRN	EYA3	NA	NA	RRM1	NA	NA	NA	NA	NA	NA	NA	NA	NA	NA
PXMP4	EYA4	NA	NA	RRP1B	NA	NA	NA	NA	NA	NA	NA	NA	NA	NA
PYGO1	EZH2	NA	NA	RRP7A	NA	NA	NA	NA	NA	NA	NA	NA	NA	NA
PYGO2	FAF1	NA	NA	RTKN2	NA	NA	NA	NA	NA	NA	NA	NA	NA	NA
QRSL1	FAIM	NA	NA	RTN4IP1	NA	NA	NA	NA	NA	NA	NA	NA	NA	NA
QSER1	FAIM2	NA	NA	RTTN	NA	NA	NA	NA	NA	NA	NA	NA	NA	NA
R3HDM1	FAM102B	NA	NA	RUVBL1	NA	NA	NA	NA	NA	NA	NA	NA	NA	NA
RAB42	FAM104B	NA	NA	SAFB	NA	NA	NA	NA	NA	NA	NA	NA	NA	NA
RACGAP1	FAM110A	NA	NA	SARS2	NA	NA	NA	NA	NA	NA	NA	NA	NA	NA
RAD51	FAM110B	NA	NA	SART3	NA	NA	NA	NA	NA	NA	NA	NA	NA	NA
RAD51AP1	FAM111A	NA	NA	SCARA3	NA	NA	NA	NA	NA	NA	NA	NA	NA	NA
RAD51C	FAM111B	NA	NA	SEMA4C	NA	NA	NA	NA	NA	NA	NA	NA	NA	NA
RAD54L	FAM120C	NA	NA	SENP1	NA	NA	NA	NA	NA	NA	NA	NA	NA	NA
RAE1	FAM122B	NA	NA	SEPHS1	NA	NA	NA	NA	NA	NA	NA	NA	NA	NA
RALGPS2	FAM129A	NA	NA	SETD1A	NA	NA	NA	NA	NA	NA	NA	NA	NA	NA
RANBP1	FAM13A	NA	NA	SETMAR	NA	NA	NA	NA	NA	NA	NA	NA	NA	NA
RARB	FAM161A	NA	NA	SF1	NA	NA	NA	NA	NA	NA	NA	NA	NA	NA
RAVER2	FAM162B	NA	NA	SF3A1	NA	NA	NA	NA	NA	NA	NA	NA	NA	NA
RBBP4	FAM173B	NA	NA	SF3A2	NA	NA	NA	NA	NA	NA	NA	NA	NA	NA
RBBP7	FAM180A	NA	NA	SF3A3	NA	NA	NA	NA	NA	NA	NA	NA	NA	NA
RBBP8	FAM192A	NA	NA	SF3B3	NA	NA	NA	NA	NA	NA	NA	NA	NA	NA
RBM14	FAM49A	NA	NA	SFMBT2	NA	NA	NA	NA	NA	NA	NA	NA	NA	NA
RBM23	FAM53B	NA	NA	SFPQ	NA	NA	NA	NA	NA	NA	NA	NA	NA	NA
RBM26	FAM76A	NA	NA	SFSWAP	NA	NA	NA	NA	NA	NA	NA	NA	NA	NA
RCL1	FAM76B	NA	NA	SFXN2	NA	NA	NA	NA	NA	NA	NA	NA	NA	NA
REC8	FAM83B	NA	NA	SHCBP1	NA	NA	NA	NA	NA	NA	NA	NA	NA	NA
RECQL4	FAM83D	NA	NA	SHMT1	NA	NA	NA	NA	NA	NA	NA	NA	NA	NA
REEP4	FAM98B	NA	NA	SIN3A	NA	NA	NA	NA	NA	NA	NA	NA	NA	NA
RELN	FAN1	NA	NA	SIPA1L2	NA	NA	NA	NA	NA	NA	NA	NA	NA	NA
RFC2	FANCA	NA	NA	SIVA1	NA	NA	NA	NA	NA	NA	NA	NA	NA	NA
RFC3	FANCB	NA	NA	SKA2	NA	NA	NA	NA	NA	NA	NA	NA	NA	NA
RFC4	FANCC	NA	NA	SKA3	NA	NA	NA	NA	NA	NA	NA	NA	NA	NA
RFC5	FANCD2	NA	NA	SLC12A7	NA	NA	NA	NA	NA	NA	NA	NA	NA	NA
RFT1	FANCE	NA	NA	SLC19A1	NA	NA	NA	NA	NA	NA	NA	NA	NA	NA
RFWD3	FANCF	NA	NA	SLC25A10	NA	NA	NA	NA	NA	NA	NA	NA	NA	NA
RGS17	FANCG	NA	NA	SLC25A13	NA	NA	NA	NA	NA	NA	NA	NA	NA	NA
RIBC2	FANCI	NA	NA	SLC25A40	NA	NA	NA	NA	NA	NA	NA	NA	NA	NA
RIMKLB	FANCL	NA	NA	SLC25A5	NA	NA	NA	NA	NA	NA	NA	NA	NA	NA
RIN1	FARS2	NA	NA	SLC29A1	NA	NA	NA	NA	NA	NA	NA	NA	NA	NA
RMI1	FASN	NA	NA	SLC37A4	NA	NA	NA	NA	NA	NA	NA	NA	NA	NA
RNASE2	FASTKD1	NA	NA	SLC4A8	NA	NA	NA	NA	NA	NA	NA	NA	NA	NA
RNASEH2A	FASTKD2	NA	NA	SLC5A6	NA	NA	NA	NA	NA	NA	NA	NA	NA	NA
RNASEH2B	FASTKD3	NA	NA	SLC7A11	NA	NA	NA	NA	NA	NA	NA	NA	NA	NA
RNF214	FAT3	NA	NA	SLC9A9	NA	NA	NA	NA	NA	NA	NA	NA	NA	NA
RNF26	FBL	NA	NA	SLFN11	NA	NA	NA	NA	NA	NA	NA	NA	NA	NA
RNFT2	FBLN1	NA	NA	SLFN13	NA	NA	NA	NA	NA	NA	NA	NA	NA	NA
ROR2	FBXO4	NA	NA	SMAD1	NA	NA	NA	NA	NA	NA	NA	NA	NA	NA
RPA2	FBXO43	NA	NA	SMAD6	NA	NA	NA	NA	NA	NA	NA	NA	NA	NA
RPA3	FBXO5	NA	NA	SMAP2	NA	NA	NA	NA	NA	NA	NA	NA	NA	NA
RPL39L	FCF1	NA	NA	SMARCA4	NA	NA	NA	NA	NA	NA	NA	NA	NA	NA
RPP25	FDXACB1	NA	NA	SMARCC1	NA	NA	NA	NA	NA	NA	NA	NA	NA	NA
RPP30	FEN1	NA	NA	SMARCD1	NA	NA	NA	NA	NA	NA	NA	NA	NA	NA
RPS6KA5	FERMT1	NA	NA	SMC1A	NA	NA	NA	NA	NA	NA	NA	NA	NA	NA
RPUSD4	FES	NA	NA	SMC2	NA	NA	NA	NA	NA	NA	NA	NA	NA	NA
RRM1	FGD1	NA	NA	SMC4	NA	NA	NA	NA	NA	NA	NA	NA	NA	NA
RRP1B	FGF7	NA	NA	SMPD4	NA	NA	NA	NA	NA	NA	NA	NA	NA	NA
RRP7A	FGFR1OP	NA	NA	SMYD5	NA	NA	NA	NA	NA	NA	NA	NA	NA	NA
RTKN2	FH	NA	NA	SNAI1	NA	NA	NA	NA	NA	NA	NA	NA	NA	NA
RTN4IP1	FHL3	NA	NA	SNORA74A	NA	NA	NA	NA	NA	NA	NA	NA	NA	NA
RTTN	FHOD1	NA	NA	SNRNP200	NA	NA	NA	NA	NA	NA	NA	NA	NA	NA
RUVBL1	FIGN	NA	NA	SNRNP40	NA	NA	NA	NA	NA	NA	NA	NA	NA	NA
SAFB	FIGNL1	NA	NA	SNRPA	NA	NA	NA	NA	NA	NA	NA	NA	NA	NA
SAP30	FIP1L1	NA	NA	SNRPC	NA	NA	NA	NA	NA	NA	NA	NA	NA	NA
SARS2	FJX1	NA	NA	SNRPD1	NA	NA	NA	NA	NA	NA	NA	NA	NA	NA
SART3	FKBP4	NA	NA	SNRPF	NA	NA	NA	NA	NA	NA	NA	NA	NA	NA
SCARA3	FLOT1	NA	NA	SORD	NA	NA	NA	NA	NA	NA	NA	NA	NA	NA
SEMA4C	FLVCR1	NA	NA	SORL1	NA	NA	NA	NA	NA	NA	NA	NA	NA	NA
SENP1	FMR1	NA	NA	SOX11	NA	NA	NA	NA	NA	NA	NA	NA	NA	NA
SEPHS1	FN3KRP	NA	NA	SP2	NA	NA	NA	NA	NA	NA	NA	NA	NA	NA
SESN3	FNDC3A	NA	NA	SP4	NA	NA	NA	NA	NA	NA	NA	NA	NA	NA
SETD1A	FOSL1	NA	NA	SPA17	NA	NA	NA	NA	NA	NA	NA	NA	NA	NA
SETMAR	FOXF1	NA	NA	SPAG5	NA	NA	NA	NA	NA	NA	NA	NA	NA	NA
SF1	FOXM1	NA	NA	SPATA5	NA	NA	NA	NA	NA	NA	NA	NA	NA	NA
SF3A1	FOXP2	NA	NA	SPATA6	NA	NA	NA	NA	NA	NA	NA	NA	NA	NA
SF3A2	FOXRED1	NA	NA	SPC24	NA	NA	NA	NA	NA	NA	NA	NA	NA	NA
SF3A3	FOXRED2	NA	NA	SPC25	NA	NA	NA	NA	NA	NA	NA	NA	NA	NA
SF3B3	FRRS1	NA	NA	SPEN	NA	NA	NA	NA	NA	NA	NA	NA	NA	NA
SFMBT2	FRYL	NA	NA	SPIN4	NA	NA	NA	NA	NA	NA	NA	NA	NA	NA
SFPQ	FRZB	NA	NA	SPTLC3	NA	NA	NA	NA	NA	NA	NA	NA	NA	NA
SFSWAP	FSD1	NA	NA	SRBD1	NA	NA	NA	NA	NA	NA	NA	NA	NA	NA
SFXN2	FST	NA	NA	SRGAP1	NA	NA	NA	NA	NA	NA	NA	NA	NA	NA
SHCBP1	FTSJ3	NA	NA	SRRT	NA	NA	NA	NA	NA	NA	NA	NA	NA	NA
SHMT1	FUBP1	NA	NA	SRSF1	NA	NA	NA	NA	NA	NA	NA	NA	NA	NA
SIN3A	FUS	NA	NA	SRSF2	NA	NA	NA	NA	NA	NA	NA	NA	NA	NA
SIPA1L2	FUT8	NA	NA	SRSF7	NA	NA	NA	NA	NA	NA	NA	NA	NA	NA
SIVA1	FUZ	NA	NA	SSBP4	NA	NA	NA	NA	NA	NA	NA	NA	NA	NA
SKA2	FZD7	NA	NA	SSRP1	NA	NA	NA	NA	NA	NA	NA	NA	NA	NA
SKA3	G2E3	NA	NA	ST6GALNAC3	NA	NA	NA	NA	NA	NA	NA	NA	NA	NA
SLC12A7	G3BP1	NA	NA	STEAP2	NA	NA	NA	NA	NA	NA	NA	NA	NA	NA
SLC19A1	G6PD	NA	NA	STIL	NA	NA	NA	NA	NA	NA	NA	NA	NA	NA
SLC25A10	GABPA	NA	NA	STK33	NA	NA	NA	NA	NA	NA	NA	NA	NA	NA
SLC25A13	GABPB1	NA	NA	STOML2	NA	NA	NA	NA	NA	NA	NA	NA	NA	NA
SLC25A40	GABRA5	NA	NA	SUV39H1	NA	NA	NA	NA	NA	NA	NA	NA	NA	NA
SLC25A5	GABRB1	NA	NA	SUV39H2	NA	NA	NA	NA	NA	NA	NA	NA	NA	NA
SLC29A1	GABRE	NA	NA	SYNE2	NA	NA	NA	NA	NA	NA	NA	NA	NA	NA
SLC37A4	GAL3ST4	NA	NA	SYTL2	NA	NA	NA	NA	NA	NA	NA	NA	NA	NA
SLC4A8	GALK2	NA	NA	TACC3	NA	NA	NA	NA	NA	NA	NA	NA	NA	NA
SLC5A6	GALM	NA	NA	TADA1	NA	NA	NA	NA	NA	NA	NA	NA	NA	NA
SLC7A11	GALNT12	NA	NA	TADA2A	NA	NA	NA	NA	NA	NA	NA	NA	NA	NA
SLC9A9	GART	NA	NA	TAF1A	NA	NA	NA	NA	NA	NA	NA	NA	NA	NA
SLCO2A1	GAS2L3	NA	NA	TAF9B	NA	NA	NA	NA	NA	NA	NA	NA	NA	NA
SLFN11	GATA2	NA	NA	TBL1XR1	NA	NA	NA	NA	NA	NA	NA	NA	NA	NA
SLFN13	GATAD2A	NA	NA	TBRG4	NA	NA	NA	NA	NA	NA	NA	NA	NA	NA
SMAD1	GBGT1	NA	NA	TBX4	NA	NA	NA	NA	NA	NA	NA	NA	NA	NA
SMAD6	GCNT1	NA	NA	TCERG1	NA	NA	NA	NA	NA	NA	NA	NA	NA	NA
SMAP2	GDAP1	NA	NA	TCF12	NA	NA	NA	NA	NA	NA	NA	NA	NA	NA
SMARCA4	GDF5	NA	NA	TCF19	NA	NA	NA	NA	NA	NA	NA	NA	NA	NA
SMARCC1	GEM	NA	NA	TCF7L2	NA	NA	NA	NA	NA	NA	NA	NA	NA	NA
SMARCD1	GEMIN4	NA	NA	TCOF1	NA	NA	NA	NA	NA	NA	NA	NA	NA	NA
SMC1A	GEMIN5	NA	NA	TDP1	NA	NA	NA	NA	NA	NA	NA	NA	NA	NA
SMC2	GEMIN6	NA	NA	TEAD2	NA	NA	NA	NA	NA	NA	NA	NA	NA	NA
SMC4	GEN1	NA	NA	TFAM	NA	NA	NA	NA	NA	NA	NA	NA	NA	NA
SMPD4	GFPT2	NA	NA	TFAP4	NA	NA	NA	NA	NA	NA	NA	NA	NA	NA
SMYD5	GGA2	NA	NA	THADA	NA	NA	NA	NA	NA	NA	NA	NA	NA	NA
SNAI1	GGH	NA	NA	THAP10	NA	NA	NA	NA	NA	NA	NA	NA	NA	NA
SNAP25	GIN1	NA	NA	THNSL1	NA	NA	NA	NA	NA	NA	NA	NA	NA	NA
SNORA70B	GINS1	NA	NA	THOC1	NA	NA	NA	NA	NA	NA	NA	NA	NA	NA
SNORA74A	GINS2	NA	NA	THOC6	NA	NA	NA	NA	NA	NA	NA	NA	NA	NA
SNRNP200	GINS3	NA	NA	TIMELESS	NA	NA	NA	NA	NA	NA	NA	NA	NA	NA
SNRNP40	GINS4	NA	NA	TIMM10	NA	NA	NA	NA	NA	NA	NA	NA	NA	NA
SNRPA	GJC1	NA	NA	TIPIN	NA	NA	NA	NA	NA	NA	NA	NA	NA	NA
SNRPC	GLB1L	NA	NA	TK1	NA	NA	NA	NA	NA	NA	NA	NA	NA	NA
SNRPD1	GLE1	NA	NA	TKT	NA	NA	NA	NA	NA	NA	NA	NA	NA	NA
SNRPF	GLI3	NA	NA	TLE1	NA	NA	NA	NA	NA	NA	NA	NA	NA	NA
SORD	GLMN	NA	NA	TLE3	NA	NA	NA	NA	NA	NA	NA	NA	NA	NA
SORL1	GLO1	NA	NA	TMED8	NA	NA	NA	NA	NA	NA	NA	NA	NA	NA
SOX11	GLOD4	NA	NA	TMEM106C	NA	NA	NA	NA	NA	NA	NA	NA	NA	NA
SP2	GLUL	NA	NA	TMEM155	NA	NA	NA	NA	NA	NA	NA	NA	NA	NA
SP4	GLYR1	NA	NA	TMEM18	NA	NA	NA	NA	NA	NA	NA	NA	NA	NA
SPA17	GMEB1	NA	NA	TMEM201	NA	NA	NA	NA	NA	NA	NA	NA	NA	NA
SPAG5	GMNN	NA	NA	TMEM209	NA	NA	NA	NA	NA	NA	NA	NA	NA	NA
SPATA5	GMPPB	NA	NA	TMEM39B	NA	NA	NA	NA	NA	NA	NA	NA	NA	NA
SPATA6	GMPS	NA	NA	TMEM97	NA	NA	NA	NA	NA	NA	NA	NA	NA	NA
SPC24	GNB3	NA	NA	TMPO	NA	NA	NA	NA	NA	NA	NA	NA	NA	NA
SPC25	GNE	NA	NA	TMTC4	NA	NA	NA	NA	NA	NA	NA	NA	NA	NA
SPEN	GNG2	NA	NA	TNRC6A	NA	NA	NA	NA	NA	NA	NA	NA	NA	NA
SPIN4	GNL3	NA	NA	TOE1	NA	NA	NA	NA	NA	NA	NA	NA	NA	NA
SPTLC3	GNL3L	NA	NA	TOMM22	NA	NA	NA	NA	NA	NA	NA	NA	NA	NA
SRBD1	GNPDA1	NA	NA	TOP1	NA	NA	NA	NA	NA	NA	NA	NA	NA	NA
SRGAP1	GNPNAT1	NA	NA	TOP3A	NA	NA	NA	NA	NA	NA	NA	NA	NA	NA
SRRT	GOLM1	NA	NA	TOX	NA	NA	NA	NA	NA	NA	NA	NA	NA	NA
SRSF1	GOT2	NA	NA	TRAIP	NA	NA	NA	NA	NA	NA	NA	NA	NA	NA
SRSF2	GPAM	NA	NA	TRAP1	NA	NA	NA	NA	NA	NA	NA	NA	NA	NA
SRSF7	GPATCH1	NA	NA	TRIM14	NA	NA	NA	NA	NA	NA	NA	NA	NA	NA
SSBP4	GPATCH4	NA	NA	TRIM28	NA	NA	NA	NA	NA	NA	NA	NA	NA	NA
SSRP1	GPBP1	NA	NA	TRIP13	NA	NA	NA	NA	NA	NA	NA	NA	NA	NA
ST6GALNAC3	GPC5	NA	NA	TRMT5	NA	NA	NA	NA	NA	NA	NA	NA	NA	NA
STAC	GPC6	NA	NA	TROAP	NA	NA	NA	NA	NA	NA	NA	NA	NA	NA
STEAP2	GPD2	NA	NA	TRPC5	NA	NA	NA	NA	NA	NA	NA	NA	NA	NA
STIL	GPHN	NA	NA	TSEN2	NA	NA	NA	NA	NA	NA	NA	NA	NA	NA
STK33	GPM6B	NA	NA	TSHZ1	NA	NA	NA	NA	NA	NA	NA	NA	NA	NA
STOML2	GPR137C	NA	NA	TSPYL5	NA	NA	NA	NA	NA	NA	NA	NA	NA	NA
SUV39H1	GPR39	NA	NA	TTC30B	NA	NA	NA	NA	NA	NA	NA	NA	NA	NA
SUV39H2	GPR85	NA	NA	TTF2	NA	NA	NA	NA	NA	NA	NA	NA	NA	NA
SYBU	GPR87	NA	NA	TTI1	NA	NA	NA	NA	NA	NA	NA	NA	NA	NA
SYNE2	GPSM2	NA	NA	TTLL12	NA	NA	NA	NA	NA	NA	NA	NA	NA	NA
SYTL2	GPX7	NA	NA	TTLL4	NA	NA	NA	NA	NA	NA	NA	NA	NA	NA
TACC3	GREM2	NA	NA	TUBD1	NA	NA	NA	NA	NA	NA	NA	NA	NA	NA
TADA1	GRK6	NA	NA	TUBGCP3	NA	NA	NA	NA	NA	NA	NA	NA	NA	NA
TADA2A	GRPEL2	NA	NA	TUBGCP4	NA	NA	NA	NA	NA	NA	NA	NA	NA	NA
TAF1A	GRPR	NA	NA	TXLNG	NA	NA	NA	NA	NA	NA	NA	NA	NA	NA
TAF9B	GRWD1	NA	NA	TXNDC16	NA	NA	NA	NA	NA	NA	NA	NA	NA	NA
TBL1XR1	GSR	NA	NA	TXNRD1	NA	NA	NA	NA	NA	NA	NA	NA	NA	NA
TBRG4	GSTCD	NA	NA	TYMS	NA	NA	NA	NA	NA	NA	NA	NA	NA	NA
TBX4	GSTM5	NA	NA	UBA2	NA	NA	NA	NA	NA	NA	NA	NA	NA	NA
TCERG1	GTF2E1	NA	NA	UBE2C	NA	NA	NA	NA	NA	NA	NA	NA	NA	NA
TCF12	GTF2E2	NA	NA	UBE2S	NA	NA	NA	NA	NA	NA	NA	NA	NA	NA
TCF19	GTF2F2	NA	NA	UBE2T	NA	NA	NA	NA	NA	NA	NA	NA	NA	NA
TCF7L2	GTF2H3	NA	NA	UBTF	NA	NA	NA	NA	NA	NA	NA	NA	NA	NA
TCOF1	GTF2H4	NA	NA	UCK1	NA	NA	NA	NA	NA	NA	NA	NA	NA	NA
TDP1	GTF2I	NA	NA	UHRF1	NA	NA	NA	NA	NA	NA	NA	NA	NA	NA
TEAD2	GTF2IRD1	NA	NA	ULBP3	NA	NA	NA	NA	NA	NA	NA	NA	NA	NA
TFAM	GTF3A	NA	NA	UMPS	NA	NA	NA	NA	NA	NA	NA	NA	NA	NA
TFAP4	GTF3C2	NA	NA	UNC5C	NA	NA	NA	NA	NA	NA	NA	NA	NA	NA
THADA	GTF3C3	NA	NA	UNG	NA	NA	NA	NA	NA	NA	NA	NA	NA	NA
THAP10	GTF3C4	NA	NA	UNK	NA	NA	NA	NA	NA	NA	NA	NA	NA	NA
THNSL1	GTF3C5	NA	NA	UPF1	NA	NA	NA	NA	NA	NA	NA	NA	NA	NA
THOC1	GTSE1	NA	NA	UPF3B	NA	NA	NA	NA	NA	NA	NA	NA	NA	NA
THOC6	GUF1	NA	NA	URB2	NA	NA	NA	NA	NA	NA	NA	NA	NA	NA
TIMELESS	GUSB	NA	NA	USP21	NA	NA	NA	NA	NA	NA	NA	NA	NA	NA
TIMM10	H1F0	NA	NA	USP28	NA	NA	NA	NA	NA	NA	NA	NA	NA	NA
TIPIN	H1FX	NA	NA	USP3	NA	NA	NA	NA	NA	NA	NA	NA	NA	NA
TK1	H2AFV	NA	NA	USP39	NA	NA	NA	NA	NA	NA	NA	NA	NA	NA
TKT	H2AFX	NA	NA	USP54	NA	NA	NA	NA	NA	NA	NA	NA	NA	NA
TLE1	H2AFY2	NA	NA	VAC14	NA	NA	NA	NA	NA	NA	NA	NA	NA	NA
TLE3	H2AFZ	NA	NA	VAT1L	NA	NA	NA	NA	NA	NA	NA	NA	NA	NA
TMED8	H3F3B	NA	NA	VPS52	NA	NA	NA	NA	NA	NA	NA	NA	NA	NA
TMEM106C	HADH	NA	NA	VSIG10	NA	NA	NA	NA	NA	NA	NA	NA	NA	NA
TMEM155	HAT1	NA	NA	VSNL1	NA	NA	NA	NA	NA	NA	NA	NA	NA	NA
TMEM18	HAUS1	NA	NA	WDHD1	NA	NA	NA	NA	NA	NA	NA	NA	NA	NA
TMEM201	HAUS2	NA	NA	WDR17	NA	NA	NA	NA	NA	NA	NA	NA	NA	NA
TMEM209	HAUS4	NA	NA	WDR34	NA	NA	NA	NA	NA	NA	NA	NA	NA	NA
TMEM39B	HAUS5	NA	NA	WDR35	NA	NA	NA	NA	NA	NA	NA	NA	NA	NA
TMEM97	HAUS6	NA	NA	WDR5	NA	NA	NA	NA	NA	NA	NA	NA	NA	NA
TMPO	HAUS8	NA	NA	WDR76	NA	NA	NA	NA	NA	NA	NA	NA	NA	NA
TMTC2	HAX1	NA	NA	WEE1	NA	NA	NA	NA	NA	NA	NA	NA	NA	NA
TMTC4	HCFC1	NA	NA	WNK3	NA	NA	NA	NA	NA	NA	NA	NA	NA	NA
TNRC6A	HCFC1R1	NA	NA	WRAP53	NA	NA	NA	NA	NA	NA	NA	NA	NA	NA
TOE1	HDAC1	NA	NA	WWC1	NA	NA	NA	NA	NA	NA	NA	NA	NA	NA
TOMM22	HDAC2	NA	NA	XKR5	NA	NA	NA	NA	NA	NA	NA	NA	NA	NA
TOP1	HDGF	NA	NA	XRCC1	NA	NA	NA	NA	NA	NA	NA	NA	NA	NA
TOP3A	HDHD3	NA	NA	XRCC2	NA	NA	NA	NA	NA	NA	NA	NA	NA	NA
TOX	HDX	NA	NA	XRCC3	NA	NA	NA	NA	NA	NA	NA	NA	NA	NA
TRAIP	HEATR1	NA	NA	YEATS4	NA	NA	NA	NA	NA	NA	NA	NA	NA	NA
TRAP1	HEATR3	NA	NA	ZBTB44	NA	NA	NA	NA	NA	NA	NA	NA	NA	NA
TRIM14	HEATR6	NA	NA	ZBTB9	NA	NA	NA	NA	NA	NA	NA	NA	NA	NA
TRIM28	HELB	NA	NA	ZC3H18	NA	NA	NA	NA	NA	NA	NA	NA	NA	NA
TRIP13	HELLS	NA	NA	ZC3H4	NA	NA	NA	NA	NA	NA	NA	NA	NA	NA
TRMT5	HEPH	NA	NA	ZCCHC14	NA	NA	NA	NA	NA	NA	NA	NA	NA	NA
TROAP	HGF	NA	NA	ZCCHC8	NA	NA	NA	NA	NA	NA	NA	NA	NA	NA
TRPC5	HHEX	NA	NA	ZFHX4	NA	NA	NA	NA	NA	NA	NA	NA	NA	NA
TSEN2	HIP1	NA	NA	ZFP3	NA	NA	NA	NA	NA	NA	NA	NA	NA	NA
TSHZ1	HIPK2	NA	NA	ZMAT4	NA	NA	NA	NA	NA	NA	NA	NA	NA	NA
TSPYL5	HIRA	NA	NA	ZMIZ1	NA	NA	NA	NA	NA	NA	NA	NA	NA	NA
TTC30B	HIRIP3	NA	NA	ZMYND8	NA	NA	NA	NA	NA	NA	NA	NA	NA	NA
TTF2	HIST1H1A	NA	NA	ZNF141	NA	NA	NA	NA	NA	NA	NA	NA	NA	NA
TTI1	HIST1H1B	NA	NA	ZNF142	NA	NA	NA	NA	NA	NA	NA	NA	NA	NA
TTLL12	HIST1H1C	NA	NA	ZNF22	NA	NA	NA	NA	NA	NA	NA	NA	NA	NA
TTLL4	HIST1H1D	NA	NA	ZNF254	NA	NA	NA	NA	NA	NA	NA	NA	NA	NA
TUBD1	HIST1H1E	NA	NA	ZNF273	NA	NA	NA	NA	NA	NA	NA	NA	NA	NA
TUBGCP3	HIST1H2AB	NA	NA	ZNF280B	NA	NA	NA	NA	NA	NA	NA	NA	NA	NA
TUBGCP4	HIST1H2AC	NA	NA	ZNF300	NA	NA	NA	NA	NA	NA	NA	NA	NA	NA
TXLNG	HIST1H2AE	NA	NA	ZNF326	NA	NA	NA	NA	NA	NA	NA	NA	NA	NA
TXNDC16	HIST1H2AH	NA	NA	ZNF334	NA	NA	NA	NA	NA	NA	NA	NA	NA	NA
TXNRD1	HIST1H2AI	NA	NA	ZNF367	NA	NA	NA	NA	NA	NA	NA	NA	NA	NA
TYMS	HIST1H2AJ	NA	NA	ZNF385D	NA	NA	NA	NA	NA	NA	NA	NA	NA	NA
U2AF1L4	HIST1H2AK	NA	NA	ZNF454	NA	NA	NA	NA	NA	NA	NA	NA	NA	NA
UBA2	HIST1H2AL	NA	NA	ZNF473	NA	NA	NA	NA	NA	NA	NA	NA	NA	NA
UBE2C	HIST1H2AM	NA	NA	ZNF503	NA	NA	NA	NA	NA	NA	NA	NA	NA	NA
UBE2O	HIST1H2BB	NA	NA	ZNF551	NA	NA	NA	NA	NA	NA	NA	NA	NA	NA
UBE2S	HIST1H2BC	NA	NA	ZNF714	NA	NA	NA	NA	NA	NA	NA	NA	NA	NA
UBE2T	HIST1H2BD	NA	NA	ZRANB3	NA	NA	NA	NA	NA	NA	NA	NA	NA	NA
UBTF	HIST1H2BE	NA	NA	ZSCAN16	NA	NA	NA	NA	NA	NA	NA	NA	NA	NA
UCK1	HIST1H2BF	NA	NA	ZSCAN2	NA	NA	NA	NA	NA	NA	NA	NA	NA	NA
UHRF1	HIST1H2BG	NA	NA	ZWINT	NA	NA	NA	NA	NA	NA	NA	NA	NA	NA
ULBP3	HIST1H2BH	NA	NA	ZYG11A	NA	NA	NA	NA	NA	NA	NA	NA	NA	NA
UMPS	HIST1H2BI	NA	NA	NA	NA	NA	NA	NA	NA	NA	NA	NA	NA	NA
UNC5C	HIST1H2BL	NA	NA	NA	NA	NA	NA	NA	NA	NA	NA	NA	NA	NA
UNG	HIST1H2BM	NA	NA	NA	NA	NA	NA	NA	NA	NA	NA	NA	NA	NA
UNK	HIST1H2BN	NA	NA	NA	NA	NA	NA	NA	NA	NA	NA	NA	NA	NA
UPF1	HIST1H2BO	NA	NA	NA	NA	NA	NA	NA	NA	NA	NA	NA	NA	NA
UPF3B	HIST1H3A	NA	NA	NA	NA	NA	NA	NA	NA	NA	NA	NA	NA	NA
URB2	HIST1H3B	NA	NA	NA	NA	NA	NA	NA	NA	NA	NA	NA	NA	NA
USP21	HIST1H3C	NA	NA	NA	NA	NA	NA	NA	NA	NA	NA	NA	NA	NA
USP28	HIST1H3E	NA	NA	NA	NA	NA	NA	NA	NA	NA	NA	NA	NA	NA
USP3	HIST1H3F	NA	NA	NA	NA	NA	NA	NA	NA	NA	NA	NA	NA	NA
USP39	HIST1H3G	NA	NA	NA	NA	NA	NA	NA	NA	NA	NA	NA	NA	NA
USP54	HIST1H3H	NA	NA	NA	NA	NA	NA	NA	NA	NA	NA	NA	NA	NA
VAC14	HIST1H3I	NA	NA	NA	NA	NA	NA	NA	NA	NA	NA	NA	NA	NA
VAT1L	HIST1H3J	NA	NA	NA	NA	NA	NA	NA	NA	NA	NA	NA	NA	NA
VPS52	HIST1H4A	NA	NA	NA	NA	NA	NA	NA	NA	NA	NA	NA	NA	NA
VSIG10	HIST1H4B	NA	NA	NA	NA	NA	NA	NA	NA	NA	NA	NA	NA	NA
VSNL1	HIST1H4C	NA	NA	NA	NA	NA	NA	NA	NA	NA	NA	NA	NA	NA
WDHD1	HIST1H4D	NA	NA	NA	NA	NA	NA	NA	NA	NA	NA	NA	NA	NA
WDR17	HIST1H4E	NA	NA	NA	NA	NA	NA	NA	NA	NA	NA	NA	NA	NA
WDR34	HIST1H4F	NA	NA	NA	NA	NA	NA	NA	NA	NA	NA	NA	NA	NA
WDR35	HIST1H4I	NA	NA	NA	NA	NA	NA	NA	NA	NA	NA	NA	NA	NA
WDR5	HIST1H4L	NA	NA	NA	NA	NA	NA	NA	NA	NA	NA	NA	NA	NA
WDR76	HIST2H2AB	NA	NA	NA	NA	NA	NA	NA	NA	NA	NA	NA	NA	NA
WEE1	HIST2H2AC	NA	NA	NA	NA	NA	NA	NA	NA	NA	NA	NA	NA	NA
WNK3	HIST3H2A	NA	NA	NA	NA	NA	NA	NA	NA	NA	NA	NA	NA	NA
WRAP53	HIST3H2BB	NA	NA	NA	NA	NA	NA	NA	NA	NA	NA	NA	NA	NA
WWC1	HJURP	NA	NA	NA	NA	NA	NA	NA	NA	NA	NA	NA	NA	NA
XKR5	HLX	NA	NA	NA	NA	NA	NA	NA	NA	NA	NA	NA	NA	NA
XRCC1	HMBS	NA	NA	NA	NA	NA	NA	NA	NA	NA	NA	NA	NA	NA
XRCC2	HMG20A	NA	NA	NA	NA	NA	NA	NA	NA	NA	NA	NA	NA	NA
XRCC3	HMG20B	NA	NA	NA	NA	NA	NA	NA	NA	NA	NA	NA	NA	NA
YEATS4	HMGA1	NA	NA	NA	NA	NA	NA	NA	NA	NA	NA	NA	NA	NA
ZBTB44	HMGB1	NA	NA	NA	NA	NA	NA	NA	NA	NA	NA	NA	NA	NA
ZBTB9	HMGB2	NA	NA	NA	NA	NA	NA	NA	NA	NA	NA	NA	NA	NA
ZC3H18	HMGB3	NA	NA	NA	NA	NA	NA	NA	NA	NA	NA	NA	NA	NA
ZC3H4	HMGN1	NA	NA	NA	NA	NA	NA	NA	NA	NA	NA	NA	NA	NA
ZCCHC14	HMGN2	NA	NA	NA	NA	NA	NA	NA	NA	NA	NA	NA	NA	NA
ZCCHC2	HMGN3	NA	NA	NA	NA	NA	NA	NA	NA	NA	NA	NA	NA	NA
ZCCHC8	HMGXB4	NA	NA	NA	NA	NA	NA	NA	NA	NA	NA	NA	NA	NA
ZDHHC13	HMMR	NA	NA	NA	NA	NA	NA	NA	NA	NA	NA	NA	NA	NA
ZFHX4	HMOX1	NA	NA	NA	NA	NA	NA	NA	NA	NA	NA	NA	NA	NA
ZFP3	HNRNPA0	NA	NA	NA	NA	NA	NA	NA	NA	NA	NA	NA	NA	NA
ZMAT4	HNRNPA1	NA	NA	NA	NA	NA	NA	NA	NA	NA	NA	NA	NA	NA
ZMIZ1	HNRNPA2B1	NA	NA	NA	NA	NA	NA	NA	NA	NA	NA	NA	NA	NA
ZMYND8	HNRNPAB	NA	NA	NA	NA	NA	NA	NA	NA	NA	NA	NA	NA	NA
ZNF141	HNRNPD	NA	NA	NA	NA	NA	NA	NA	NA	NA	NA	NA	NA	NA
ZNF142	HNRNPF	NA	NA	NA	NA	NA	NA	NA	NA	NA	NA	NA	NA	NA
ZNF22	HNRNPH1	NA	NA	NA	NA	NA	NA	NA	NA	NA	NA	NA	NA	NA
ZNF254	HNRNPH3	NA	NA	NA	NA	NA	NA	NA	NA	NA	NA	NA	NA	NA
ZNF273	HNRNPL	NA	NA	NA	NA	NA	NA	NA	NA	NA	NA	NA	NA	NA
ZNF280B	HNRNPM	NA	NA	NA	NA	NA	NA	NA	NA	NA	NA	NA	NA	NA
ZNF300	HNRNPR	NA	NA	NA	NA	NA	NA	NA	NA	NA	NA	NA	NA	NA
ZNF326	HNRNPU	NA	NA	NA	NA	NA	NA	NA	NA	NA	NA	NA	NA	NA
ZNF334	HNRNPUL1	NA	NA	NA	NA	NA	NA	NA	NA	NA	NA	NA	NA	NA
ZNF367	HOXA2	NA	NA	NA	NA	NA	NA	NA	NA	NA	NA	NA	NA	NA
ZNF385D	HOXA3	NA	NA	NA	NA	NA	NA	NA	NA	NA	NA	NA	NA	NA
ZNF454	HOXA4	NA	NA	NA	NA	NA	NA	NA	NA	NA	NA	NA	NA	NA
ZNF473	HOXA5	NA	NA	NA	NA	NA	NA	NA	NA	NA	NA	NA	NA	NA
ZNF503	HOXA6	NA	NA	NA	NA	NA	NA	NA	NA	NA	NA	NA	NA	NA
ZNF551	HOXA7	NA	NA	NA	NA	NA	NA	NA	NA	NA	NA	NA	NA	NA
ZNF589	HOXC5	NA	NA	NA	NA	NA	NA	NA	NA	NA	NA	NA	NA	NA
ZNF714	HPDL	NA	NA	NA	NA	NA	NA	NA	NA	NA	NA	NA	NA	NA
ZNF814	HPRT1	NA	NA	NA	NA	NA	NA	NA	NA	NA	NA	NA	NA	NA
ZRANB3	HPS4	NA	NA	NA	NA	NA	NA	NA	NA	NA	NA	NA	NA	NA
ZSCAN16	HS3ST3B1	NA	NA	NA	NA	NA	NA	NA	NA	NA	NA	NA	NA	NA
ZSCAN2	HS6ST1	NA	NA	NA	NA	NA	NA	NA	NA	NA	NA	NA	NA	NA
ZWINT	HSCB	NA	NA	NA	NA	NA	NA	NA	NA	NA	NA	NA	NA	NA
ZYG11A	HSF2	NA	NA	NA	NA	NA	NA	NA	NA	NA	NA	NA	NA	NA
NA	HSP90AB1	NA	NA	NA	NA	NA	NA	NA	NA	NA	NA	NA	NA	NA
NA	HSPA12A	NA	NA	NA	NA	NA	NA	NA	NA	NA	NA	NA	NA	NA
NA	HSPA14	NA	NA	NA	NA	NA	NA	NA	NA	NA	NA	NA	NA	NA
NA	HSPA2	NA	NA	NA	NA	NA	NA	NA	NA	NA	NA	NA	NA	NA
NA	HSPB11	NA	NA	NA	NA	NA	NA	NA	NA	NA	NA	NA	NA	NA
NA	HSPBAP1	NA	NA	NA	NA	NA	NA	NA	NA	NA	NA	NA	NA	NA
NA	HSPD1	NA	NA	NA	NA	NA	NA	NA	NA	NA	NA	NA	NA	NA
NA	HSPH1	NA	NA	NA	NA	NA	NA	NA	NA	NA	NA	NA	NA	NA
NA	HTATSF1	NA	NA	NA	NA	NA	NA	NA	NA	NA	NA	NA	NA	NA
NA	HTR2B	NA	NA	NA	NA	NA	NA	NA	NA	NA	NA	NA	NA	NA
NA	HUNK	NA	NA	NA	NA	NA	NA	NA	NA	NA	NA	NA	NA	NA
NA	HYLS1	NA	NA	NA	NA	NA	NA	NA	NA	NA	NA	NA	NA	NA
NA	HYOU1	NA	NA	NA	NA	NA	NA	NA	NA	NA	NA	NA	NA	NA
NA	ICA1L	NA	NA	NA	NA	NA	NA	NA	NA	NA	NA	NA	NA	NA
NA	ICK	NA	NA	NA	NA	NA	NA	NA	NA	NA	NA	NA	NA	NA
NA	ID1	NA	NA	NA	NA	NA	NA	NA	NA	NA	NA	NA	NA	NA
NA	ID2	NA	NA	NA	NA	NA	NA	NA	NA	NA	NA	NA	NA	NA
NA	ID4	NA	NA	NA	NA	NA	NA	NA	NA	NA	NA	NA	NA	NA
NA	IDH2	NA	NA	NA	NA	NA	NA	NA	NA	NA	NA	NA	NA	NA
NA	IDH3A	NA	NA	NA	NA	NA	NA	NA	NA	NA	NA	NA	NA	NA
NA	IER2	NA	NA	NA	NA	NA	NA	NA	NA	NA	NA	NA	NA	NA
NA	IFI16	NA	NA	NA	NA	NA	NA	NA	NA	NA	NA	NA	NA	NA
NA	IFRD2	NA	NA	NA	NA	NA	NA	NA	NA	NA	NA	NA	NA	NA
NA	IFT122	NA	NA	NA	NA	NA	NA	NA	NA	NA	NA	NA	NA	NA
NA	IFT46	NA	NA	NA	NA	NA	NA	NA	NA	NA	NA	NA	NA	NA
NA	IFT57	NA	NA	NA	NA	NA	NA	NA	NA	NA	NA	NA	NA	NA
NA	IFT74	NA	NA	NA	NA	NA	NA	NA	NA	NA	NA	NA	NA	NA
NA	IFT80	NA	NA	NA	NA	NA	NA	NA	NA	NA	NA	NA	NA	NA
NA	IFT81	NA	NA	NA	NA	NA	NA	NA	NA	NA	NA	NA	NA	NA
NA	IFT88	NA	NA	NA	NA	NA	NA	NA	NA	NA	NA	NA	NA	NA
NA	IGF2BP1	NA	NA	NA	NA	NA	NA	NA	NA	NA	NA	NA	NA	NA
NA	IGSF10	NA	NA	NA	NA	NA	NA	NA	NA	NA	NA	NA	NA	NA
NA	IKZF4	NA	NA	NA	NA	NA	NA	NA	NA	NA	NA	NA	NA	NA
NA	IL17RE	NA	NA	NA	NA	NA	NA	NA	NA	NA	NA	NA	NA	NA
NA	IL18R1	NA	NA	NA	NA	NA	NA	NA	NA	NA	NA	NA	NA	NA
NA	IL1R1	NA	NA	NA	NA	NA	NA	NA	NA	NA	NA	NA	NA	NA
NA	IL31RA	NA	NA	NA	NA	NA	NA	NA	NA	NA	NA	NA	NA	NA
NA	IL6R	NA	NA	NA	NA	NA	NA	NA	NA	NA	NA	NA	NA	NA
NA	ILF2	NA	NA	NA	NA	NA	NA	NA	NA	NA	NA	NA	NA	NA
NA	ILF3	NA	NA	NA	NA	NA	NA	NA	NA	NA	NA	NA	NA	NA
NA	ILKAP	NA	NA	NA	NA	NA	NA	NA	NA	NA	NA	NA	NA	NA
NA	IMMP1L	NA	NA	NA	NA	NA	NA	NA	NA	NA	NA	NA	NA	NA
NA	IMP4	NA	NA	NA	NA	NA	NA	NA	NA	NA	NA	NA	NA	NA
NA	IMPDH2	NA	NA	NA	NA	NA	NA	NA	NA	NA	NA	NA	NA	NA
NA	INCENP	NA	NA	NA	NA	NA	NA	NA	NA	NA	NA	NA	NA	NA
NA	ING3	NA	NA	NA	NA	NA	NA	NA	NA	NA	NA	NA	NA	NA
NA	INPP5B	NA	NA	NA	NA	NA	NA	NA	NA	NA	NA	NA	NA	NA
NA	INTS2	NA	NA	NA	NA	NA	NA	NA	NA	NA	NA	NA	NA	NA
NA	INTS4	NA	NA	NA	NA	NA	NA	NA	NA	NA	NA	NA	NA	NA
NA	INTS7	NA	NA	NA	NA	NA	NA	NA	NA	NA	NA	NA	NA	NA
NA	INTS8	NA	NA	NA	NA	NA	NA	NA	NA	NA	NA	NA	NA	NA
NA	INTS9	NA	NA	NA	NA	NA	NA	NA	NA	NA	NA	NA	NA	NA
NA	INVS	NA	NA	NA	NA	NA	NA	NA	NA	NA	NA	NA	NA	NA
NA	IPO4	NA	NA	NA	NA	NA	NA	NA	NA	NA	NA	NA	NA	NA
NA	IPO5	NA	NA	NA	NA	NA	NA	NA	NA	NA	NA	NA	NA	NA
NA	IPO9	NA	NA	NA	NA	NA	NA	NA	NA	NA	NA	NA	NA	NA
NA	IQCB1	NA	NA	NA	NA	NA	NA	NA	NA	NA	NA	NA	NA	NA
NA	IQCC	NA	NA	NA	NA	NA	NA	NA	NA	NA	NA	NA	NA	NA
NA	IQCG	NA	NA	NA	NA	NA	NA	NA	NA	NA	NA	NA	NA	NA
NA	IQGAP3	NA	NA	NA	NA	NA	NA	NA	NA	NA	NA	NA	NA	NA
NA	IRAK1BP1	NA	NA	NA	NA	NA	NA	NA	NA	NA	NA	NA	NA	NA
NA	IRAK3	NA	NA	NA	NA	NA	NA	NA	NA	NA	NA	NA	NA	NA
NA	IRF2	NA	NA	NA	NA	NA	NA	NA	NA	NA	NA	NA	NA	NA
NA	IRS1	NA	NA	NA	NA	NA	NA	NA	NA	NA	NA	NA	NA	NA
NA	ISLR	NA	NA	NA	NA	NA	NA	NA	NA	NA	NA	NA	NA	NA
NA	ISOC1	NA	NA	NA	NA	NA	NA	NA	NA	NA	NA	NA	NA	NA
NA	ITGB3BP	NA	NA	NA	NA	NA	NA	NA	NA	NA	NA	NA	NA	NA
NA	ITPA	NA	NA	NA	NA	NA	NA	NA	NA	NA	NA	NA	NA	NA
NA	ITPRIPL1	NA	NA	NA	NA	NA	NA	NA	NA	NA	NA	NA	NA	NA
NA	JAGN1	NA	NA	NA	NA	NA	NA	NA	NA	NA	NA	NA	NA	NA
NA	KARS	NA	NA	NA	NA	NA	NA	NA	NA	NA	NA	NA	NA	NA
NA	KAT2A	NA	NA	NA	NA	NA	NA	NA	NA	NA	NA	NA	NA	NA
NA	KAT5	NA	NA	NA	NA	NA	NA	NA	NA	NA	NA	NA	NA	NA
NA	KBTBD6	NA	NA	NA	NA	NA	NA	NA	NA	NA	NA	NA	NA	NA
NA	KBTBD7	NA	NA	NA	NA	NA	NA	NA	NA	NA	NA	NA	NA	NA
NA	KCNAB3	NA	NA	NA	NA	NA	NA	NA	NA	NA	NA	NA	NA	NA
NA	KCNE4	NA	NA	NA	NA	NA	NA	NA	NA	NA	NA	NA	NA	NA
NA	KCNIP3	NA	NA	NA	NA	NA	NA	NA	NA	NA	NA	NA	NA	NA
NA	KCNJ8	NA	NA	NA	NA	NA	NA	NA	NA	NA	NA	NA	NA	NA
NA	KCNK2	NA	NA	NA	NA	NA	NA	NA	NA	NA	NA	NA	NA	NA
NA	KCNQ5	NA	NA	NA	NA	NA	NA	NA	NA	NA	NA	NA	NA	NA
NA	KCTD3	NA	NA	NA	NA	NA	NA	NA	NA	NA	NA	NA	NA	NA
NA	KCTD6	NA	NA	NA	NA	NA	NA	NA	NA	NA	NA	NA	NA	NA
NA	KDELC2	NA	NA	NA	NA	NA	NA	NA	NA	NA	NA	NA	NA	NA
NA	KDM1A	NA	NA	NA	NA	NA	NA	NA	NA	NA	NA	NA	NA	NA
NA	KDM2B	NA	NA	NA	NA	NA	NA	NA	NA	NA	NA	NA	NA	NA
NA	KDM3B	NA	NA	NA	NA	NA	NA	NA	NA	NA	NA	NA	NA	NA
NA	KDM4D	NA	NA	NA	NA	NA	NA	NA	NA	NA	NA	NA	NA	NA
NA	KHDRBS1	NA	NA	NA	NA	NA	NA	NA	NA	NA	NA	NA	NA	NA
NA	KHDRBS3	NA	NA	NA	NA	NA	NA	NA	NA	NA	NA	NA	NA	NA
NA	KHK	NA	NA	NA	NA	NA	NA	NA	NA	NA	NA	NA	NA	NA
NA	KHSRP	NA	NA	NA	NA	NA	NA	NA	NA	NA	NA	NA	NA	NA
NA	KIAA0586	NA	NA	NA	NA	NA	NA	NA	NA	NA	NA	NA	NA	NA
NA	KIAA0753	NA	NA	NA	NA	NA	NA	NA	NA	NA	NA	NA	NA	NA
NA	KIAA1586	NA	NA	NA	NA	NA	NA	NA	NA	NA	NA	NA	NA	NA
NA	KIAA1841	NA	NA	NA	NA	NA	NA	NA	NA	NA	NA	NA	NA	NA
NA	KIF11	NA	NA	NA	NA	NA	NA	NA	NA	NA	NA	NA	NA	NA
NA	KIF13A	NA	NA	NA	NA	NA	NA	NA	NA	NA	NA	NA	NA	NA
NA	KIF14	NA	NA	NA	NA	NA	NA	NA	NA	NA	NA	NA	NA	NA
NA	KIF15	NA	NA	NA	NA	NA	NA	NA	NA	NA	NA	NA	NA	NA
NA	KIF18A	NA	NA	NA	NA	NA	NA	NA	NA	NA	NA	NA	NA	NA
NA	KIF18B	NA	NA	NA	NA	NA	NA	NA	NA	NA	NA	NA	NA	NA
NA	KIF20A	NA	NA	NA	NA	NA	NA	NA	NA	NA	NA	NA	NA	NA
NA	KIF20B	NA	NA	NA	NA	NA	NA	NA	NA	NA	NA	NA	NA	NA
NA	KIF22	NA	NA	NA	NA	NA	NA	NA	NA	NA	NA	NA	NA	NA
NA	KIF23	NA	NA	NA	NA	NA	NA	NA	NA	NA	NA	NA	NA	NA
NA	KIF24	NA	NA	NA	NA	NA	NA	NA	NA	NA	NA	NA	NA	NA
NA	KIF2A	NA	NA	NA	NA	NA	NA	NA	NA	NA	NA	NA	NA	NA
NA	KIF2C	NA	NA	NA	NA	NA	NA	NA	NA	NA	NA	NA	NA	NA
NA	KIF4A	NA	NA	NA	NA	NA	NA	NA	NA	NA	NA	NA	NA	NA
NA	KIFC1	NA	NA	NA	NA	NA	NA	NA	NA	NA	NA	NA	NA	NA
NA	KITLG	NA	NA	NA	NA	NA	NA	NA	NA	NA	NA	NA	NA	NA
NA	KLF3	NA	NA	NA	NA	NA	NA	NA	NA	NA	NA	NA	NA	NA
NA	KLHL11	NA	NA	NA	NA	NA	NA	NA	NA	NA	NA	NA	NA	NA
NA	KLHL13	NA	NA	NA	NA	NA	NA	NA	NA	NA	NA	NA	NA	NA
NA	KLHL15	NA	NA	NA	NA	NA	NA	NA	NA	NA	NA	NA	NA	NA
NA	KLHL8	NA	NA	NA	NA	NA	NA	NA	NA	NA	NA	NA	NA	NA
NA	KNTC1	NA	NA	NA	NA	NA	NA	NA	NA	NA	NA	NA	NA	NA
NA	KPNB1	NA	NA	NA	NA	NA	NA	NA	NA	NA	NA	NA	NA	NA
NA	KRI1	NA	NA	NA	NA	NA	NA	NA	NA	NA	NA	NA	NA	NA
NA	KRR1	NA	NA	NA	NA	NA	NA	NA	NA	NA	NA	NA	NA	NA
NA	KRT19	NA	NA	NA	NA	NA	NA	NA	NA	NA	NA	NA	NA	NA
NA	KRT7	NA	NA	NA	NA	NA	NA	NA	NA	NA	NA	NA	NA	NA
NA	KYNU	NA	NA	NA	NA	NA	NA	NA	NA	NA	NA	NA	NA	NA
NA	L2HGDH	NA	NA	NA	NA	NA	NA	NA	NA	NA	NA	NA	NA	NA
NA	LANCL1	NA	NA	NA	NA	NA	NA	NA	NA	NA	NA	NA	NA	NA
NA	LANCL2	NA	NA	NA	NA	NA	NA	NA	NA	NA	NA	NA	NA	NA
NA	LARP1	NA	NA	NA	NA	NA	NA	NA	NA	NA	NA	NA	NA	NA
NA	LARP4	NA	NA	NA	NA	NA	NA	NA	NA	NA	NA	NA	NA	NA
NA	LARP7	NA	NA	NA	NA	NA	NA	NA	NA	NA	NA	NA	NA	NA
NA	LARS	NA	NA	NA	NA	NA	NA	NA	NA	NA	NA	NA	NA	NA
NA	LARS2	NA	NA	NA	NA	NA	NA	NA	NA	NA	NA	NA	NA	NA
NA	LAS1L	NA	NA	NA	NA	NA	NA	NA	NA	NA	NA	NA	NA	NA
NA	LBR	NA	NA	NA	NA	NA	NA	NA	NA	NA	NA	NA	NA	NA
NA	LCMT2	NA	NA	NA	NA	NA	NA	NA	NA	NA	NA	NA	NA	NA
NA	LCORL	NA	NA	NA	NA	NA	NA	NA	NA	NA	NA	NA	NA	NA
NA	LCTL	NA	NA	NA	NA	NA	NA	NA	NA	NA	NA	NA	NA	NA
NA	LDB2	NA	NA	NA	NA	NA	NA	NA	NA	NA	NA	NA	NA	NA
NA	LDHB	NA	NA	NA	NA	NA	NA	NA	NA	NA	NA	NA	NA	NA
NA	LDLRAD3	NA	NA	NA	NA	NA	NA	NA	NA	NA	NA	NA	NA	NA
NA	LHFPL2	NA	NA	NA	NA	NA	NA	NA	NA	NA	NA	NA	NA	NA
NA	LIAS	NA	NA	NA	NA	NA	NA	NA	NA	NA	NA	NA	NA	NA
NA	LIFR	NA	NA	NA	NA	NA	NA	NA	NA	NA	NA	NA	NA	NA
NA	LIG1	NA	NA	NA	NA	NA	NA	NA	NA	NA	NA	NA	NA	NA
NA	LIG3	NA	NA	NA	NA	NA	NA	NA	NA	NA	NA	NA	NA	NA
NA	LIMD1	NA	NA	NA	NA	NA	NA	NA	NA	NA	NA	NA	NA	NA
NA	LIN52	NA	NA	NA	NA	NA	NA	NA	NA	NA	NA	NA	NA	NA
NA	LIN54	NA	NA	NA	NA	NA	NA	NA	NA	NA	NA	NA	NA	NA
NA	LIN7A	NA	NA	NA	NA	NA	NA	NA	NA	NA	NA	NA	NA	NA
NA	LIN9	NA	NA	NA	NA	NA	NA	NA	NA	NA	NA	NA	NA	NA
NA	LIPT1	NA	NA	NA	NA	NA	NA	NA	NA	NA	NA	NA	NA	NA
NA	LMAN2L	NA	NA	NA	NA	NA	NA	NA	NA	NA	NA	NA	NA	NA
NA	LMNB1	NA	NA	NA	NA	NA	NA	NA	NA	NA	NA	NA	NA	NA
NA	LMNB2	NA	NA	NA	NA	NA	NA	NA	NA	NA	NA	NA	NA	NA
NA	LMO4	NA	NA	NA	NA	NA	NA	NA	NA	NA	NA	NA	NA	NA
NA	LOC339803	NA	NA	NA	NA	NA	NA	NA	NA	NA	NA	NA	NA	NA
NA	LONP1	NA	NA	NA	NA	NA	NA	NA	NA	NA	NA	NA	NA	NA
NA	LONRF1	NA	NA	NA	NA	NA	NA	NA	NA	NA	NA	NA	NA	NA
NA	LPAR6	NA	NA	NA	NA	NA	NA	NA	NA	NA	NA	NA	NA	NA
NA	LPCAT1	NA	NA	NA	NA	NA	NA	NA	NA	NA	NA	NA	NA	NA
NA	LRIG3	NA	NA	NA	NA	NA	NA	NA	NA	NA	NA	NA	NA	NA
NA	LRP11	NA	NA	NA	NA	NA	NA	NA	NA	NA	NA	NA	NA	NA
NA	LRP4	NA	NA	NA	NA	NA	NA	NA	NA	NA	NA	NA	NA	NA
NA	LRPPRC	NA	NA	NA	NA	NA	NA	NA	NA	NA	NA	NA	NA	NA
NA	LRRC46	NA	NA	NA	NA	NA	NA	NA	NA	NA	NA	NA	NA	NA
NA	LRRC49	NA	NA	NA	NA	NA	NA	NA	NA	NA	NA	NA	NA	NA
NA	LRRC59	NA	NA	NA	NA	NA	NA	NA	NA	NA	NA	NA	NA	NA
NA	LRRC61	NA	NA	NA	NA	NA	NA	NA	NA	NA	NA	NA	NA	NA
NA	LRRC8B	NA	NA	NA	NA	NA	NA	NA	NA	NA	NA	NA	NA	NA
NA	LRRCC1	NA	NA	NA	NA	NA	NA	NA	NA	NA	NA	NA	NA	NA
NA	LRRN1	NA	NA	NA	NA	NA	NA	NA	NA	NA	NA	NA	NA	NA
NA	LRRTM2	NA	NA	NA	NA	NA	NA	NA	NA	NA	NA	NA	NA	NA
NA	LRTOMT	NA	NA	NA	NA	NA	NA	NA	NA	NA	NA	NA	NA	NA
NA	LSAMP	NA	NA	NA	NA	NA	NA	NA	NA	NA	NA	NA	NA	NA
NA	LSG1	NA	NA	NA	NA	NA	NA	NA	NA	NA	NA	NA	NA	NA
NA	LSM2	NA	NA	NA	NA	NA	NA	NA	NA	NA	NA	NA	NA	NA
NA	LSM5	NA	NA	NA	NA	NA	NA	NA	NA	NA	NA	NA	NA	NA
NA	LSM6	NA	NA	NA	NA	NA	NA	NA	NA	NA	NA	NA	NA	NA
NA	LSM7	NA	NA	NA	NA	NA	NA	NA	NA	NA	NA	NA	NA	NA
NA	LTV1	NA	NA	NA	NA	NA	NA	NA	NA	NA	NA	NA	NA	NA
NA	LUC7L	NA	NA	NA	NA	NA	NA	NA	NA	NA	NA	NA	NA	NA
NA	LXN	NA	NA	NA	NA	NA	NA	NA	NA	NA	NA	NA	NA	NA
NA	LYAR	NA	NA	NA	NA	NA	NA	NA	NA	NA	NA	NA	NA	NA
NA	LYPD1	NA	NA	NA	NA	NA	NA	NA	NA	NA	NA	NA	NA	NA
NA	LYPD6	NA	NA	NA	NA	NA	NA	NA	NA	NA	NA	NA	NA	NA
NA	LYRM1	NA	NA	NA	NA	NA	NA	NA	NA	NA	NA	NA	NA	NA
NA	LYRM2	NA	NA	NA	NA	NA	NA	NA	NA	NA	NA	NA	NA	NA
NA	LYRM4	NA	NA	NA	NA	NA	NA	NA	NA	NA	NA	NA	NA	NA
NA	LZIC	NA	NA	NA	NA	NA	NA	NA	NA	NA	NA	NA	NA	NA
NA	MAB21L2	NA	NA	NA	NA	NA	NA	NA	NA	NA	NA	NA	NA	NA
NA	MAD2L1	NA	NA	NA	NA	NA	NA	NA	NA	NA	NA	NA	NA	NA
NA	MAD2L2	NA	NA	NA	NA	NA	NA	NA	NA	NA	NA	NA	NA	NA
NA	MADD	NA	NA	NA	NA	NA	NA	NA	NA	NA	NA	NA	NA	NA
NA	MAGI3	NA	NA	NA	NA	NA	NA	NA	NA	NA	NA	NA	NA	NA
NA	MAGOHB	NA	NA	NA	NA	NA	NA	NA	NA	NA	NA	NA	NA	NA
NA	MAMLD1	NA	NA	NA	NA	NA	NA	NA	NA	NA	NA	NA	NA	NA
NA	MAN1A1	NA	NA	NA	NA	NA	NA	NA	NA	NA	NA	NA	NA	NA
NA	MAOB	NA	NA	NA	NA	NA	NA	NA	NA	NA	NA	NA	NA	NA
NA	MAP2K6	NA	NA	NA	NA	NA	NA	NA	NA	NA	NA	NA	NA	NA
NA	MAP3K14	NA	NA	NA	NA	NA	NA	NA	NA	NA	NA	NA	NA	NA
NA	MAP3K4	NA	NA	NA	NA	NA	NA	NA	NA	NA	NA	NA	NA	NA
NA	MAP3K5	NA	NA	NA	NA	NA	NA	NA	NA	NA	NA	NA	NA	NA
NA	MARCKS	NA	NA	NA	NA	NA	NA	NA	NA	NA	NA	NA	NA	NA
NA	MARK2	NA	NA	NA	NA	NA	NA	NA	NA	NA	NA	NA	NA	NA
NA	MASTL	NA	NA	NA	NA	NA	NA	NA	NA	NA	NA	NA	NA	NA
NA	MAT2A	NA	NA	NA	NA	NA	NA	NA	NA	NA	NA	NA	NA	NA
NA	MAT2B	NA	NA	NA	NA	NA	NA	NA	NA	NA	NA	NA	NA	NA
NA	MATN2	NA	NA	NA	NA	NA	NA	NA	NA	NA	NA	NA	NA	NA
NA	MATN3	NA	NA	NA	NA	NA	NA	NA	NA	NA	NA	NA	NA	NA
NA	MAZ	NA	NA	NA	NA	NA	NA	NA	NA	NA	NA	NA	NA	NA
NA	MBD3	NA	NA	NA	NA	NA	NA	NA	NA	NA	NA	NA	NA	NA
NA	MBNL3	NA	NA	NA	NA	NA	NA	NA	NA	NA	NA	NA	NA	NA
NA	MBOAT1	NA	NA	NA	NA	NA	NA	NA	NA	NA	NA	NA	NA	NA
NA	MBTD1	NA	NA	NA	NA	NA	NA	NA	NA	NA	NA	NA	NA	NA
NA	MC1R	NA	NA	NA	NA	NA	NA	NA	NA	NA	NA	NA	NA	NA
NA	MCCC2	NA	NA	NA	NA	NA	NA	NA	NA	NA	NA	NA	NA	NA
NA	MCM10	NA	NA	NA	NA	NA	NA	NA	NA	NA	NA	NA	NA	NA
NA	MCM2	NA	NA	NA	NA	NA	NA	NA	NA	NA	NA	NA	NA	NA
NA	MCM3	NA	NA	NA	NA	NA	NA	NA	NA	NA	NA	NA	NA	NA
NA	MCM4	NA	NA	NA	NA	NA	NA	NA	NA	NA	NA	NA	NA	NA
NA	MCM5	NA	NA	NA	NA	NA	NA	NA	NA	NA	NA	NA	NA	NA
NA	MCM6	NA	NA	NA	NA	NA	NA	NA	NA	NA	NA	NA	NA	NA
NA	MCM7	NA	NA	NA	NA	NA	NA	NA	NA	NA	NA	NA	NA	NA
NA	MCM8	NA	NA	NA	NA	NA	NA	NA	NA	NA	NA	NA	NA	NA
NA	MCM9	NA	NA	NA	NA	NA	NA	NA	NA	NA	NA	NA	NA	NA
NA	MCRS1	NA	NA	NA	NA	NA	NA	NA	NA	NA	NA	NA	NA	NA
NA	MDC1	NA	NA	NA	NA	NA	NA	NA	NA	NA	NA	NA	NA	NA
NA	MDFIC	NA	NA	NA	NA	NA	NA	NA	NA	NA	NA	NA	NA	NA
NA	MDK	NA	NA	NA	NA	NA	NA	NA	NA	NA	NA	NA	NA	NA
NA	MDM1	NA	NA	NA	NA	NA	NA	NA	NA	NA	NA	NA	NA	NA
NA	MDM4	NA	NA	NA	NA	NA	NA	NA	NA	NA	NA	NA	NA	NA
NA	MDN1	NA	NA	NA	NA	NA	NA	NA	NA	NA	NA	NA	NA	NA
NA	ME2	NA	NA	NA	NA	NA	NA	NA	NA	NA	NA	NA	NA	NA
NA	ME3	NA	NA	NA	NA	NA	NA	NA	NA	NA	NA	NA	NA	NA
NA	MECOM	NA	NA	NA	NA	NA	NA	NA	NA	NA	NA	NA	NA	NA
NA	MED1	NA	NA	NA	NA	NA	NA	NA	NA	NA	NA	NA	NA	NA
NA	MED10	NA	NA	NA	NA	NA	NA	NA	NA	NA	NA	NA	NA	NA
NA	MED18	NA	NA	NA	NA	NA	NA	NA	NA	NA	NA	NA	NA	NA
NA	MED21	NA	NA	NA	NA	NA	NA	NA	NA	NA	NA	NA	NA	NA
NA	MED22	NA	NA	NA	NA	NA	NA	NA	NA	NA	NA	NA	NA	NA
NA	MED24	NA	NA	NA	NA	NA	NA	NA	NA	NA	NA	NA	NA	NA
NA	MED28	NA	NA	NA	NA	NA	NA	NA	NA	NA	NA	NA	NA	NA
NA	MED4	NA	NA	NA	NA	NA	NA	NA	NA	NA	NA	NA	NA	NA
NA	MED6	NA	NA	NA	NA	NA	NA	NA	NA	NA	NA	NA	NA	NA
NA	MEF2C	NA	NA	NA	NA	NA	NA	NA	NA	NA	NA	NA	NA	NA
NA	MEIS1	NA	NA	NA	NA	NA	NA	NA	NA	NA	NA	NA	NA	NA
NA	MEIS2	NA	NA	NA	NA	NA	NA	NA	NA	NA	NA	NA	NA	NA
NA	MELK	NA	NA	NA	NA	NA	NA	NA	NA	NA	NA	NA	NA	NA
NA	MEN1	NA	NA	NA	NA	NA	NA	NA	NA	NA	NA	NA	NA	NA
NA	MEPCE	NA	NA	NA	NA	NA	NA	NA	NA	NA	NA	NA	NA	NA
NA	METAP1	NA	NA	NA	NA	NA	NA	NA	NA	NA	NA	NA	NA	NA
NA	METAP1D	NA	NA	NA	NA	NA	NA	NA	NA	NA	NA	NA	NA	NA
NA	METTL1	NA	NA	NA	NA	NA	NA	NA	NA	NA	NA	NA	NA	NA
NA	METTL4	NA	NA	NA	NA	NA	NA	NA	NA	NA	NA	NA	NA	NA
NA	METTL7A	NA	NA	NA	NA	NA	NA	NA	NA	NA	NA	NA	NA	NA
NA	MEX3B	NA	NA	NA	NA	NA	NA	NA	NA	NA	NA	NA	NA	NA
NA	MEX3D	NA	NA	NA	NA	NA	NA	NA	NA	NA	NA	NA	NA	NA
NA	MFHAS1	NA	NA	NA	NA	NA	NA	NA	NA	NA	NA	NA	NA	NA
NA	MFSD2A	NA	NA	NA	NA	NA	NA	NA	NA	NA	NA	NA	NA	NA
NA	MGA	NA	NA	NA	NA	NA	NA	NA	NA	NA	NA	NA	NA	NA
NA	MID1	NA	NA	NA	NA	NA	NA	NA	NA	NA	NA	NA	NA	NA
NA	MID1IP1	NA	NA	NA	NA	NA	NA	NA	NA	NA	NA	NA	NA	NA
NA	MID2	NA	NA	NA	NA	NA	NA	NA	NA	NA	NA	NA	NA	NA
NA	MIDN	NA	NA	NA	NA	NA	NA	NA	NA	NA	NA	NA	NA	NA
NA	MIOS	NA	NA	NA	NA	NA	NA	NA	NA	NA	NA	NA	NA	NA
NA	MIPEP	NA	NA	NA	NA	NA	NA	NA	NA	NA	NA	NA	NA	NA
NA	MIS12	NA	NA	NA	NA	NA	NA	NA	NA	NA	NA	NA	NA	NA
NA	MITD1	NA	NA	NA	NA	NA	NA	NA	NA	NA	NA	NA	NA	NA
NA	MKI67	NA	NA	NA	NA	NA	NA	NA	NA	NA	NA	NA	NA	NA
NA	MKS1	NA	NA	NA	NA	NA	NA	NA	NA	NA	NA	NA	NA	NA
NA	MLH1	NA	NA	NA	NA	NA	NA	NA	NA	NA	NA	NA	NA	NA
NA	MLLT10	NA	NA	NA	NA	NA	NA	NA	NA	NA	NA	NA	NA	NA
NA	MLLT3	NA	NA	NA	NA	NA	NA	NA	NA	NA	NA	NA	NA	NA
NA	MLPH	NA	NA	NA	NA	NA	NA	NA	NA	NA	NA	NA	NA	NA
NA	MMACHC	NA	NA	NA	NA	NA	NA	NA	NA	NA	NA	NA	NA	NA
NA	MMD	NA	NA	NA	NA	NA	NA	NA	NA	NA	NA	NA	NA	NA
NA	MMS22L	NA	NA	NA	NA	NA	NA	NA	NA	NA	NA	NA	NA	NA
NA	MND1	NA	NA	NA	NA	NA	NA	NA	NA	NA	NA	NA	NA	NA
NA	MNS1	NA	NA	NA	NA	NA	NA	NA	NA	NA	NA	NA	NA	NA
NA	MORC2	NA	NA	NA	NA	NA	NA	NA	NA	NA	NA	NA	NA	NA
NA	MORN2	NA	NA	NA	NA	NA	NA	NA	NA	NA	NA	NA	NA	NA
NA	MOXD1	NA	NA	NA	NA	NA	NA	NA	NA	NA	NA	NA	NA	NA
NA	MPDU1	NA	NA	NA	NA	NA	NA	NA	NA	NA	NA	NA	NA	NA
NA	MPHOSPH6	NA	NA	NA	NA	NA	NA	NA	NA	NA	NA	NA	NA	NA
NA	MPHOSPH9	NA	NA	NA	NA	NA	NA	NA	NA	NA	NA	NA	NA	NA
NA	MPP6	NA	NA	NA	NA	NA	NA	NA	NA	NA	NA	NA	NA	NA
NA	MRFAP1L1	NA	NA	NA	NA	NA	NA	NA	NA	NA	NA	NA	NA	NA
NA	MRPL1	NA	NA	NA	NA	NA	NA	NA	NA	NA	NA	NA	NA	NA
NA	MRPL13	NA	NA	NA	NA	NA	NA	NA	NA	NA	NA	NA	NA	NA
NA	MRPL15	NA	NA	NA	NA	NA	NA	NA	NA	NA	NA	NA	NA	NA
NA	MRPL18	NA	NA	NA	NA	NA	NA	NA	NA	NA	NA	NA	NA	NA
NA	MRPL24	NA	NA	NA	NA	NA	NA	NA	NA	NA	NA	NA	NA	NA
NA	MRPL3	NA	NA	NA	NA	NA	NA	NA	NA	NA	NA	NA	NA	NA
NA	MRPL30	NA	NA	NA	NA	NA	NA	NA	NA	NA	NA	NA	NA	NA
NA	MRPL35	NA	NA	NA	NA	NA	NA	NA	NA	NA	NA	NA	NA	NA
NA	MRPL38	NA	NA	NA	NA	NA	NA	NA	NA	NA	NA	NA	NA	NA
NA	MRPL39	NA	NA	NA	NA	NA	NA	NA	NA	NA	NA	NA	NA	NA
NA	MRPL42	NA	NA	NA	NA	NA	NA	NA	NA	NA	NA	NA	NA	NA
NA	MRPL44	NA	NA	NA	NA	NA	NA	NA	NA	NA	NA	NA	NA	NA
NA	MRPL47	NA	NA	NA	NA	NA	NA	NA	NA	NA	NA	NA	NA	NA
NA	MRPL48	NA	NA	NA	NA	NA	NA	NA	NA	NA	NA	NA	NA	NA
NA	MRPL9	NA	NA	NA	NA	NA	NA	NA	NA	NA	NA	NA	NA	NA
NA	MRPS12	NA	NA	NA	NA	NA	NA	NA	NA	NA	NA	NA	NA	NA
NA	MRPS14	NA	NA	NA	NA	NA	NA	NA	NA	NA	NA	NA	NA	NA
NA	MRPS15	NA	NA	NA	NA	NA	NA	NA	NA	NA	NA	NA	NA	NA
NA	MRPS16	NA	NA	NA	NA	NA	NA	NA	NA	NA	NA	NA	NA	NA
NA	MRPS17	NA	NA	NA	NA	NA	NA	NA	NA	NA	NA	NA	NA	NA
NA	MRPS18B	NA	NA	NA	NA	NA	NA	NA	NA	NA	NA	NA	NA	NA
NA	MRPS2	NA	NA	NA	NA	NA	NA	NA	NA	NA	NA	NA	NA	NA
NA	MRPS23	NA	NA	NA	NA	NA	NA	NA	NA	NA	NA	NA	NA	NA
NA	MRPS27	NA	NA	NA	NA	NA	NA	NA	NA	NA	NA	NA	NA	NA
NA	MRPS28	NA	NA	NA	NA	NA	NA	NA	NA	NA	NA	NA	NA	NA
NA	MRPS30	NA	NA	NA	NA	NA	NA	NA	NA	NA	NA	NA	NA	NA
NA	MRPS31	NA	NA	NA	NA	NA	NA	NA	NA	NA	NA	NA	NA	NA
NA	MRPS35	NA	NA	NA	NA	NA	NA	NA	NA	NA	NA	NA	NA	NA
NA	MRPS9	NA	NA	NA	NA	NA	NA	NA	NA	NA	NA	NA	NA	NA
NA	MRRF	NA	NA	NA	NA	NA	NA	NA	NA	NA	NA	NA	NA	NA
NA	MRTO4	NA	NA	NA	NA	NA	NA	NA	NA	NA	NA	NA	NA	NA
NA	MSH2	NA	NA	NA	NA	NA	NA	NA	NA	NA	NA	NA	NA	NA
NA	MSH6	NA	NA	NA	NA	NA	NA	NA	NA	NA	NA	NA	NA	NA
NA	MSL1	NA	NA	NA	NA	NA	NA	NA	NA	NA	NA	NA	NA	NA
NA	MSL2	NA	NA	NA	NA	NA	NA	NA	NA	NA	NA	NA	NA	NA
NA	MT1A	NA	NA	NA	NA	NA	NA	NA	NA	NA	NA	NA	NA	NA
NA	MTA1	NA	NA	NA	NA	NA	NA	NA	NA	NA	NA	NA	NA	NA
NA	MTA2	NA	NA	NA	NA	NA	NA	NA	NA	NA	NA	NA	NA	NA
NA	MTBP	NA	NA	NA	NA	NA	NA	NA	NA	NA	NA	NA	NA	NA
NA	MTF2	NA	NA	NA	NA	NA	NA	NA	NA	NA	NA	NA	NA	NA
NA	MTFP1	NA	NA	NA	NA	NA	NA	NA	NA	NA	NA	NA	NA	NA
NA	MTHFD1	NA	NA	NA	NA	NA	NA	NA	NA	NA	NA	NA	NA	NA
NA	MTIF2	NA	NA	NA	NA	NA	NA	NA	NA	NA	NA	NA	NA	NA
NA	MTMR11	NA	NA	NA	NA	NA	NA	NA	NA	NA	NA	NA	NA	NA
NA	MTMR2	NA	NA	NA	NA	NA	NA	NA	NA	NA	NA	NA	NA	NA
NA	MTMR4	NA	NA	NA	NA	NA	NA	NA	NA	NA	NA	NA	NA	NA
NA	MTR	NA	NA	NA	NA	NA	NA	NA	NA	NA	NA	NA	NA	NA
NA	MTRF1	NA	NA	NA	NA	NA	NA	NA	NA	NA	NA	NA	NA	NA
NA	MTRR	NA	NA	NA	NA	NA	NA	NA	NA	NA	NA	NA	NA	NA
NA	MTSS1L	NA	NA	NA	NA	NA	NA	NA	NA	NA	NA	NA	NA	NA
NA	MXD3	NA	NA	NA	NA	NA	NA	NA	NA	NA	NA	NA	NA	NA
NA	MYB	NA	NA	NA	NA	NA	NA	NA	NA	NA	NA	NA	NA	NA
NA	MYBBP1A	NA	NA	NA	NA	NA	NA	NA	NA	NA	NA	NA	NA	NA
NA	MYBL2	NA	NA	NA	NA	NA	NA	NA	NA	NA	NA	NA	NA	NA
NA	MYH10	NA	NA	NA	NA	NA	NA	NA	NA	NA	NA	NA	NA	NA
NA	MYNN	NA	NA	NA	NA	NA	NA	NA	NA	NA	NA	NA	NA	NA
NA	MYO19	NA	NA	NA	NA	NA	NA	NA	NA	NA	NA	NA	NA	NA
NA	MYPN	NA	NA	NA	NA	NA	NA	NA	NA	NA	NA	NA	NA	NA
NA	N4BP2	NA	NA	NA	NA	NA	NA	NA	NA	NA	NA	NA	NA	NA
NA	N6AMT1	NA	NA	NA	NA	NA	NA	NA	NA	NA	NA	NA	NA	NA
NA	NAA15	NA	NA	NA	NA	NA	NA	NA	NA	NA	NA	NA	NA	NA
NA	NAA16	NA	NA	NA	NA	NA	NA	NA	NA	NA	NA	NA	NA	NA
NA	NAA25	NA	NA	NA	NA	NA	NA	NA	NA	NA	NA	NA	NA	NA
NA	NAA50	NA	NA	NA	NA	NA	NA	NA	NA	NA	NA	NA	NA	NA
NA	NAB2	NA	NA	NA	NA	NA	NA	NA	NA	NA	NA	NA	NA	NA
NA	NACA	NA	NA	NA	NA	NA	NA	NA	NA	NA	NA	NA	NA	NA
NA	NAF1	NA	NA	NA	NA	NA	NA	NA	NA	NA	NA	NA	NA	NA
NA	NAGA	NA	NA	NA	NA	NA	NA	NA	NA	NA	NA	NA	NA	NA
NA	NAP1L4	NA	NA	NA	NA	NA	NA	NA	NA	NA	NA	NA	NA	NA
NA	NAPEPLD	NA	NA	NA	NA	NA	NA	NA	NA	NA	NA	NA	NA	NA
NA	NARS2	NA	NA	NA	NA	NA	NA	NA	NA	NA	NA	NA	NA	NA
NA	NASP	NA	NA	NA	NA	NA	NA	NA	NA	NA	NA	NA	NA	NA
NA	NAT10	NA	NA	NA	NA	NA	NA	NA	NA	NA	NA	NA	NA	NA
NA	NAV2	NA	NA	NA	NA	NA	NA	NA	NA	NA	NA	NA	NA	NA
NA	NBN	NA	NA	NA	NA	NA	NA	NA	NA	NA	NA	NA	NA	NA
NA	NBPF3	NA	NA	NA	NA	NA	NA	NA	NA	NA	NA	NA	NA	NA
NA	NCAPD2	NA	NA	NA	NA	NA	NA	NA	NA	NA	NA	NA	NA	NA
NA	NCAPD3	NA	NA	NA	NA	NA	NA	NA	NA	NA	NA	NA	NA	NA
NA	NCAPG	NA	NA	NA	NA	NA	NA	NA	NA	NA	NA	NA	NA	NA
NA	NCAPG2	NA	NA	NA	NA	NA	NA	NA	NA	NA	NA	NA	NA	NA
NA	NCAPH	NA	NA	NA	NA	NA	NA	NA	NA	NA	NA	NA	NA	NA
NA	NCAPH2	NA	NA	NA	NA	NA	NA	NA	NA	NA	NA	NA	NA	NA
NA	NCBP1	NA	NA	NA	NA	NA	NA	NA	NA	NA	NA	NA	NA	NA
NA	NCL	NA	NA	NA	NA	NA	NA	NA	NA	NA	NA	NA	NA	NA
NA	NCOA5	NA	NA	NA	NA	NA	NA	NA	NA	NA	NA	NA	NA	NA
NA	NCOA6	NA	NA	NA	NA	NA	NA	NA	NA	NA	NA	NA	NA	NA
NA	NDC80	NA	NA	NA	NA	NA	NA	NA	NA	NA	NA	NA	NA	NA
NA	NDE1	NA	NA	NA	NA	NA	NA	NA	NA	NA	NA	NA	NA	NA
NA	NDP	NA	NA	NA	NA	NA	NA	NA	NA	NA	NA	NA	NA	NA
NA	NDUFA9	NA	NA	NA	NA	NA	NA	NA	NA	NA	NA	NA	NA	NA
NA	NDUFAF4	NA	NA	NA	NA	NA	NA	NA	NA	NA	NA	NA	NA	NA
NA	NEDD1	NA	NA	NA	NA	NA	NA	NA	NA	NA	NA	NA	NA	NA
NA	NEFH	NA	NA	NA	NA	NA	NA	NA	NA	NA	NA	NA	NA	NA
NA	NEIL3	NA	NA	NA	NA	NA	NA	NA	NA	NA	NA	NA	NA	NA
NA	NEK2	NA	NA	NA	NA	NA	NA	NA	NA	NA	NA	NA	NA	NA
NA	NEK4	NA	NA	NA	NA	NA	NA	NA	NA	NA	NA	NA	NA	NA
NA	NETO2	NA	NA	NA	NA	NA	NA	NA	NA	NA	NA	NA	NA	NA
NA	NFATC3	NA	NA	NA	NA	NA	NA	NA	NA	NA	NA	NA	NA	NA
NA	NFE2L2	NA	NA	NA	NA	NA	NA	NA	NA	NA	NA	NA	NA	NA
NA	NFIA	NA	NA	NA	NA	NA	NA	NA	NA	NA	NA	NA	NA	NA
NA	NFIB	NA	NA	NA	NA	NA	NA	NA	NA	NA	NA	NA	NA	NA
NA	NFIC	NA	NA	NA	NA	NA	NA	NA	NA	NA	NA	NA	NA	NA
NA	NFIL3	NA	NA	NA	NA	NA	NA	NA	NA	NA	NA	NA	NA	NA
NA	NFIX	NA	NA	NA	NA	NA	NA	NA	NA	NA	NA	NA	NA	NA
NA	NFKBID	NA	NA	NA	NA	NA	NA	NA	NA	NA	NA	NA	NA	NA
NA	NFRKB	NA	NA	NA	NA	NA	NA	NA	NA	NA	NA	NA	NA	NA
NA	NFX1	NA	NA	NA	NA	NA	NA	NA	NA	NA	NA	NA	NA	NA
NA	NFYA	NA	NA	NA	NA	NA	NA	NA	NA	NA	NA	NA	NA	NA
NA	NFYB	NA	NA	NA	NA	NA	NA	NA	NA	NA	NA	NA	NA	NA
NA	NFYC	NA	NA	NA	NA	NA	NA	NA	NA	NA	NA	NA	NA	NA
NA	NHEJ1	NA	NA	NA	NA	NA	NA	NA	NA	NA	NA	NA	NA	NA
NA	NHLRC3	NA	NA	NA	NA	NA	NA	NA	NA	NA	NA	NA	NA	NA
NA	NHP2	NA	NA	NA	NA	NA	NA	NA	NA	NA	NA	NA	NA	NA
NA	NHSL1	NA	NA	NA	NA	NA	NA	NA	NA	NA	NA	NA	NA	NA
NA	NID1	NA	NA	NA	NA	NA	NA	NA	NA	NA	NA	NA	NA	NA
NA	NID2	NA	NA	NA	NA	NA	NA	NA	NA	NA	NA	NA	NA	NA
NA	NIF3L1	NA	NA	NA	NA	NA	NA	NA	NA	NA	NA	NA	NA	NA
NA	NIN	NA	NA	NA	NA	NA	NA	NA	NA	NA	NA	NA	NA	NA
NA	NIP7	NA	NA	NA	NA	NA	NA	NA	NA	NA	NA	NA	NA	NA
NA	NKAPL	NA	NA	NA	NA	NA	NA	NA	NA	NA	NA	NA	NA	NA
NA	NKRF	NA	NA	NA	NA	NA	NA	NA	NA	NA	NA	NA	NA	NA
NA	NLE1	NA	NA	NA	NA	NA	NA	NA	NA	NA	NA	NA	NA	NA
NA	NLN	NA	NA	NA	NA	NA	NA	NA	NA	NA	NA	NA	NA	NA
NA	NNAT	NA	NA	NA	NA	NA	NA	NA	NA	NA	NA	NA	NA	NA
NA	NOB1	NA	NA	NA	NA	NA	NA	NA	NA	NA	NA	NA	NA	NA
NA	NOC2L	NA	NA	NA	NA	NA	NA	NA	NA	NA	NA	NA	NA	NA
NA	NOC3L	NA	NA	NA	NA	NA	NA	NA	NA	NA	NA	NA	NA	NA
NA	NOC4L	NA	NA	NA	NA	NA	NA	NA	NA	NA	NA	NA	NA	NA
NA	NOD1	NA	NA	NA	NA	NA	NA	NA	NA	NA	NA	NA	NA	NA
NA	NOL11	NA	NA	NA	NA	NA	NA	NA	NA	NA	NA	NA	NA	NA
NA	NOL12	NA	NA	NA	NA	NA	NA	NA	NA	NA	NA	NA	NA	NA
NA	NOL6	NA	NA	NA	NA	NA	NA	NA	NA	NA	NA	NA	NA	NA
NA	NOL8	NA	NA	NA	NA	NA	NA	NA	NA	NA	NA	NA	NA	NA
NA	NOL9	NA	NA	NA	NA	NA	NA	NA	NA	NA	NA	NA	NA	NA
NA	NOLC1	NA	NA	NA	NA	NA	NA	NA	NA	NA	NA	NA	NA	NA
NA	NONO	NA	NA	NA	NA	NA	NA	NA	NA	NA	NA	NA	NA	NA
NA	NOP16	NA	NA	NA	NA	NA	NA	NA	NA	NA	NA	NA	NA	NA
NA	NOP2	NA	NA	NA	NA	NA	NA	NA	NA	NA	NA	NA	NA	NA
NA	NOP58	NA	NA	NA	NA	NA	NA	NA	NA	NA	NA	NA	NA	NA
NA	NOV	NA	NA	NA	NA	NA	NA	NA	NA	NA	NA	NA	NA	NA
NA	NOVA1	NA	NA	NA	NA	NA	NA	NA	NA	NA	NA	NA	NA	NA
NA	NPAT	NA	NA	NA	NA	NA	NA	NA	NA	NA	NA	NA	NA	NA
NA	NPM1	NA	NA	NA	NA	NA	NA	NA	NA	NA	NA	NA	NA	NA
NA	NPM3	NA	NA	NA	NA	NA	NA	NA	NA	NA	NA	NA	NA	NA
NA	NPR3	NA	NA	NA	NA	NA	NA	NA	NA	NA	NA	NA	NA	NA
NA	NPRL3	NA	NA	NA	NA	NA	NA	NA	NA	NA	NA	NA	NA	NA
NA	NPTX1	NA	NA	NA	NA	NA	NA	NA	NA	NA	NA	NA	NA	NA
NA	NQO1	NA	NA	NA	NA	NA	NA	NA	NA	NA	NA	NA	NA	NA
NA	NQO2	NA	NA	NA	NA	NA	NA	NA	NA	NA	NA	NA	NA	NA
NA	NR1D2	NA	NA	NA	NA	NA	NA	NA	NA	NA	NA	NA	NA	NA
NA	NR2C2	NA	NA	NA	NA	NA	NA	NA	NA	NA	NA	NA	NA	NA
NA	NR2C2AP	NA	NA	NA	NA	NA	NA	NA	NA	NA	NA	NA	NA	NA
NA	NR2F1	NA	NA	NA	NA	NA	NA	NA	NA	NA	NA	NA	NA	NA
NA	NR4A1	NA	NA	NA	NA	NA	NA	NA	NA	NA	NA	NA	NA	NA
NA	NR4A2	NA	NA	NA	NA	NA	NA	NA	NA	NA	NA	NA	NA	NA
NA	NRF1	NA	NA	NA	NA	NA	NA	NA	NA	NA	NA	NA	NA	NA
NA	NRGN	NA	NA	NA	NA	NA	NA	NA	NA	NA	NA	NA	NA	NA
NA	NRIP1	NA	NA	NA	NA	NA	NA	NA	NA	NA	NA	NA	NA	NA
NA	NRM	NA	NA	NA	NA	NA	NA	NA	NA	NA	NA	NA	NA	NA
NA	NRP1	NA	NA	NA	NA	NA	NA	NA	NA	NA	NA	NA	NA	NA
NA	NRP2	NA	NA	NA	NA	NA	NA	NA	NA	NA	NA	NA	NA	NA
NA	NSD1	NA	NA	NA	NA	NA	NA	NA	NA	NA	NA	NA	NA	NA
NA	NSL1	NA	NA	NA	NA	NA	NA	NA	NA	NA	NA	NA	NA	NA
NA	NSMAF	NA	NA	NA	NA	NA	NA	NA	NA	NA	NA	NA	NA	NA
NA	NSMCE2	NA	NA	NA	NA	NA	NA	NA	NA	NA	NA	NA	NA	NA
NA	NSMCE4A	NA	NA	NA	NA	NA	NA	NA	NA	NA	NA	NA	NA	NA
NA	NSUN3	NA	NA	NA	NA	NA	NA	NA	NA	NA	NA	NA	NA	NA
NA	NSUN4	NA	NA	NA	NA	NA	NA	NA	NA	NA	NA	NA	NA	NA
NA	NSUN6	NA	NA	NA	NA	NA	NA	NA	NA	NA	NA	NA	NA	NA
NA	NT5DC2	NA	NA	NA	NA	NA	NA	NA	NA	NA	NA	NA	NA	NA
NA	NUBP1	NA	NA	NA	NA	NA	NA	NA	NA	NA	NA	NA	NA	NA
NA	NUBPL	NA	NA	NA	NA	NA	NA	NA	NA	NA	NA	NA	NA	NA
NA	NUCKS1	NA	NA	NA	NA	NA	NA	NA	NA	NA	NA	NA	NA	NA
NA	NUDC	NA	NA	NA	NA	NA	NA	NA	NA	NA	NA	NA	NA	NA
NA	NUDCD2	NA	NA	NA	NA	NA	NA	NA	NA	NA	NA	NA	NA	NA
NA	NUDT11	NA	NA	NA	NA	NA	NA	NA	NA	NA	NA	NA	NA	NA
NA	NUDT12	NA	NA	NA	NA	NA	NA	NA	NA	NA	NA	NA	NA	NA
NA	NUDT13	NA	NA	NA	NA	NA	NA	NA	NA	NA	NA	NA	NA	NA
NA	NUDT15	NA	NA	NA	NA	NA	NA	NA	NA	NA	NA	NA	NA	NA
NA	NUDT2	NA	NA	NA	NA	NA	NA	NA	NA	NA	NA	NA	NA	NA
NA	NUDT21	NA	NA	NA	NA	NA	NA	NA	NA	NA	NA	NA	NA	NA
NA	NUF2	NA	NA	NA	NA	NA	NA	NA	NA	NA	NA	NA	NA	NA
NA	NUFIP1	NA	NA	NA	NA	NA	NA	NA	NA	NA	NA	NA	NA	NA
NA	NUMA1	NA	NA	NA	NA	NA	NA	NA	NA	NA	NA	NA	NA	NA
NA	NUP107	NA	NA	NA	NA	NA	NA	NA	NA	NA	NA	NA	NA	NA
NA	NUP133	NA	NA	NA	NA	NA	NA	NA	NA	NA	NA	NA	NA	NA
NA	NUP153	NA	NA	NA	NA	NA	NA	NA	NA	NA	NA	NA	NA	NA
NA	NUP155	NA	NA	NA	NA	NA	NA	NA	NA	NA	NA	NA	NA	NA
NA	NUP160	NA	NA	NA	NA	NA	NA	NA	NA	NA	NA	NA	NA	NA
NA	NUP188	NA	NA	NA	NA	NA	NA	NA	NA	NA	NA	NA	NA	NA
NA	NUP205	NA	NA	NA	NA	NA	NA	NA	NA	NA	NA	NA	NA	NA
NA	NUP214	NA	NA	NA	NA	NA	NA	NA	NA	NA	NA	NA	NA	NA
NA	NUP35	NA	NA	NA	NA	NA	NA	NA	NA	NA	NA	NA	NA	NA
NA	NUP37	NA	NA	NA	NA	NA	NA	NA	NA	NA	NA	NA	NA	NA
NA	NUP43	NA	NA	NA	NA	NA	NA	NA	NA	NA	NA	NA	NA	NA
NA	NUP50	NA	NA	NA	NA	NA	NA	NA	NA	NA	NA	NA	NA	NA
NA	NUP54	NA	NA	NA	NA	NA	NA	NA	NA	NA	NA	NA	NA	NA
NA	NUP85	NA	NA	NA	NA	NA	NA	NA	NA	NA	NA	NA	NA	NA
NA	NUP88	NA	NA	NA	NA	NA	NA	NA	NA	NA	NA	NA	NA	NA
NA	NUP93	NA	NA	NA	NA	NA	NA	NA	NA	NA	NA	NA	NA	NA
NA	NUP98	NA	NA	NA	NA	NA	NA	NA	NA	NA	NA	NA	NA	NA
NA	NUSAP1	NA	NA	NA	NA	NA	NA	NA	NA	NA	NA	NA	NA	NA
NA	NVL	NA	NA	NA	NA	NA	NA	NA	NA	NA	NA	NA	NA	NA
NA	NXT2	NA	NA	NA	NA	NA	NA	NA	NA	NA	NA	NA	NA	NA
NA	OAS3	NA	NA	NA	NA	NA	NA	NA	NA	NA	NA	NA	NA	NA
NA	OCLM	NA	NA	NA	NA	NA	NA	NA	NA	NA	NA	NA	NA	NA
NA	ODC1	NA	NA	NA	NA	NA	NA	NA	NA	NA	NA	NA	NA	NA
NA	ODF2	NA	NA	NA	NA	NA	NA	NA	NA	NA	NA	NA	NA	NA
NA	OGG1	NA	NA	NA	NA	NA	NA	NA	NA	NA	NA	NA	NA	NA
NA	OIP5	NA	NA	NA	NA	NA	NA	NA	NA	NA	NA	NA	NA	NA
NA	OLFML2B	NA	NA	NA	NA	NA	NA	NA	NA	NA	NA	NA	NA	NA
NA	OLFML3	NA	NA	NA	NA	NA	NA	NA	NA	NA	NA	NA	NA	NA
NA	ORC1	NA	NA	NA	NA	NA	NA	NA	NA	NA	NA	NA	NA	NA
NA	ORC2	NA	NA	NA	NA	NA	NA	NA	NA	NA	NA	NA	NA	NA
NA	ORC5	NA	NA	NA	NA	NA	NA	NA	NA	NA	NA	NA	NA	NA
NA	ORC6	NA	NA	NA	NA	NA	NA	NA	NA	NA	NA	NA	NA	NA
NA	OSBPL9	NA	NA	NA	NA	NA	NA	NA	NA	NA	NA	NA	NA	NA
NA	OSGEPL1	NA	NA	NA	NA	NA	NA	NA	NA	NA	NA	NA	NA	NA
NA	OXNAD1	NA	NA	NA	NA	NA	NA	NA	NA	NA	NA	NA	NA	NA
NA	PA2G4	NA	NA	NA	NA	NA	NA	NA	NA	NA	NA	NA	NA	NA
NA	PACRGL	NA	NA	NA	NA	NA	NA	NA	NA	NA	NA	NA	NA	NA
NA	PAFAH1B3	NA	NA	NA	NA	NA	NA	NA	NA	NA	NA	NA	NA	NA
NA	PAICS	NA	NA	NA	NA	NA	NA	NA	NA	NA	NA	NA	NA	NA
NA	PAK1IP1	NA	NA	NA	NA	NA	NA	NA	NA	NA	NA	NA	NA	NA
NA	PAK3	NA	NA	NA	NA	NA	NA	NA	NA	NA	NA	NA	NA	NA
NA	PAK4	NA	NA	NA	NA	NA	NA	NA	NA	NA	NA	NA	NA	NA
NA	PALB2	NA	NA	NA	NA	NA	NA	NA	NA	NA	NA	NA	NA	NA
NA	PAN2	NA	NA	NA	NA	NA	NA	NA	NA	NA	NA	NA	NA	NA
NA	PAN3	NA	NA	NA	NA	NA	NA	NA	NA	NA	NA	NA	NA	NA
NA	PAQR4	NA	NA	NA	NA	NA	NA	NA	NA	NA	NA	NA	NA	NA
NA	PAQR5	NA	NA	NA	NA	NA	NA	NA	NA	NA	NA	NA	NA	NA
NA	PARN	NA	NA	NA	NA	NA	NA	NA	NA	NA	NA	NA	NA	NA
NA	PARP1	NA	NA	NA	NA	NA	NA	NA	NA	NA	NA	NA	NA	NA
NA	PARP2	NA	NA	NA	NA	NA	NA	NA	NA	NA	NA	NA	NA	NA
NA	PARP9	NA	NA	NA	NA	NA	NA	NA	NA	NA	NA	NA	NA	NA
NA	PASK	NA	NA	NA	NA	NA	NA	NA	NA	NA	NA	NA	NA	NA
NA	PATL1	NA	NA	NA	NA	NA	NA	NA	NA	NA	NA	NA	NA	NA
NA	PATZ1	NA	NA	NA	NA	NA	NA	NA	NA	NA	NA	NA	NA	NA
NA	PAXIP1	NA	NA	NA	NA	NA	NA	NA	NA	NA	NA	NA	NA	NA
NA	PBK	NA	NA	NA	NA	NA	NA	NA	NA	NA	NA	NA	NA	NA
NA	PBRM1	NA	NA	NA	NA	NA	NA	NA	NA	NA	NA	NA	NA	NA
NA	PBX1	NA	NA	NA	NA	NA	NA	NA	NA	NA	NA	NA	NA	NA
NA	PBX3	NA	NA	NA	NA	NA	NA	NA	NA	NA	NA	NA	NA	NA
NA	PCBP1	NA	NA	NA	NA	NA	NA	NA	NA	NA	NA	NA	NA	NA
NA	PCCA	NA	NA	NA	NA	NA	NA	NA	NA	NA	NA	NA	NA	NA
NA	PCDH18	NA	NA	NA	NA	NA	NA	NA	NA	NA	NA	NA	NA	NA
NA	PCF11	NA	NA	NA	NA	NA	NA	NA	NA	NA	NA	NA	NA	NA
NA	PCGF6	NA	NA	NA	NA	NA	NA	NA	NA	NA	NA	NA	NA	NA
NA	PCID2	NA	NA	NA	NA	NA	NA	NA	NA	NA	NA	NA	NA	NA
NA	PCIF1	NA	NA	NA	NA	NA	NA	NA	NA	NA	NA	NA	NA	NA
NA	PCM1	NA	NA	NA	NA	NA	NA	NA	NA	NA	NA	NA	NA	NA
NA	PCNA	NA	NA	NA	NA	NA	NA	NA	NA	NA	NA	NA	NA	NA
NA	PCNT	NA	NA	NA	NA	NA	NA	NA	NA	NA	NA	NA	NA	NA
NA	PCOLCE	NA	NA	NA	NA	NA	NA	NA	NA	NA	NA	NA	NA	NA
NA	PDCD11	NA	NA	NA	NA	NA	NA	NA	NA	NA	NA	NA	NA	NA
NA	PDE3B	NA	NA	NA	NA	NA	NA	NA	NA	NA	NA	NA	NA	NA
NA	PDE7A	NA	NA	NA	NA	NA	NA	NA	NA	NA	NA	NA	NA	NA
NA	PDE7B	NA	NA	NA	NA	NA	NA	NA	NA	NA	NA	NA	NA	NA
NA	PDGFD	NA	NA	NA	NA	NA	NA	NA	NA	NA	NA	NA	NA	NA
NA	PDGFRA	NA	NA	NA	NA	NA	NA	NA	NA	NA	NA	NA	NA	NA
NA	PDIA4	NA	NA	NA	NA	NA	NA	NA	NA	NA	NA	NA	NA	NA
NA	PDIK1L	NA	NA	NA	NA	NA	NA	NA	NA	NA	NA	NA	NA	NA
NA	PDP2	NA	NA	NA	NA	NA	NA	NA	NA	NA	NA	NA	NA	NA
NA	PDS5B	NA	NA	NA	NA	NA	NA	NA	NA	NA	NA	NA	NA	NA
NA	PDSS1	NA	NA	NA	NA	NA	NA	NA	NA	NA	NA	NA	NA	NA
NA	PDSS2	NA	NA	NA	NA	NA	NA	NA	NA	NA	NA	NA	NA	NA
NA	PDZRN3	NA	NA	NA	NA	NA	NA	NA	NA	NA	NA	NA	NA	NA
NA	PECR	NA	NA	NA	NA	NA	NA	NA	NA	NA	NA	NA	NA	NA
NA	PEG10	NA	NA	NA	NA	NA	NA	NA	NA	NA	NA	NA	NA	NA
NA	PELI1	NA	NA	NA	NA	NA	NA	NA	NA	NA	NA	NA	NA	NA
NA	PELI2	NA	NA	NA	NA	NA	NA	NA	NA	NA	NA	NA	NA	NA
NA	PELP1	NA	NA	NA	NA	NA	NA	NA	NA	NA	NA	NA	NA	NA
NA	PER2	NA	NA	NA	NA	NA	NA	NA	NA	NA	NA	NA	NA	NA
NA	PER3	NA	NA	NA	NA	NA	NA	NA	NA	NA	NA	NA	NA	NA
NA	PES1	NA	NA	NA	NA	NA	NA	NA	NA	NA	NA	NA	NA	NA
NA	PEX1	NA	NA	NA	NA	NA	NA	NA	NA	NA	NA	NA	NA	NA
NA	PEX12	NA	NA	NA	NA	NA	NA	NA	NA	NA	NA	NA	NA	NA
NA	PFAS	NA	NA	NA	NA	NA	NA	NA	NA	NA	NA	NA	NA	NA
NA	PFKM	NA	NA	NA	NA	NA	NA	NA	NA	NA	NA	NA	NA	NA
NA	PGBD1	NA	NA	NA	NA	NA	NA	NA	NA	NA	NA	NA	NA	NA
NA	PGBD2	NA	NA	NA	NA	NA	NA	NA	NA	NA	NA	NA	NA	NA
NA	PGD	NA	NA	NA	NA	NA	NA	NA	NA	NA	NA	NA	NA	NA
NA	PHACTR4	NA	NA	NA	NA	NA	NA	NA	NA	NA	NA	NA	NA	NA
NA	PHB2	NA	NA	NA	NA	NA	NA	NA	NA	NA	NA	NA	NA	NA
NA	PHC1	NA	NA	NA	NA	NA	NA	NA	NA	NA	NA	NA	NA	NA
NA	PHF14	NA	NA	NA	NA	NA	NA	NA	NA	NA	NA	NA	NA	NA
NA	PHF19	NA	NA	NA	NA	NA	NA	NA	NA	NA	NA	NA	NA	NA
NA	PHF2	NA	NA	NA	NA	NA	NA	NA	NA	NA	NA	NA	NA	NA
NA	PHF3	NA	NA	NA	NA	NA	NA	NA	NA	NA	NA	NA	NA	NA
NA	PHF5A	NA	NA	NA	NA	NA	NA	NA	NA	NA	NA	NA	NA	NA
NA	PHF6	NA	NA	NA	NA	NA	NA	NA	NA	NA	NA	NA	NA	NA
NA	PHF7	NA	NA	NA	NA	NA	NA	NA	NA	NA	NA	NA	NA	NA
NA	PHGDH	NA	NA	NA	NA	NA	NA	NA	NA	NA	NA	NA	NA	NA
NA	PHIP	NA	NA	NA	NA	NA	NA	NA	NA	NA	NA	NA	NA	NA
NA	PHKA2	NA	NA	NA	NA	NA	NA	NA	NA	NA	NA	NA	NA	NA
NA	PHLDA1	NA	NA	NA	NA	NA	NA	NA	NA	NA	NA	NA	NA	NA
NA	PHLPP1	NA	NA	NA	NA	NA	NA	NA	NA	NA	NA	NA	NA	NA
NA	PHLPP2	NA	NA	NA	NA	NA	NA	NA	NA	NA	NA	NA	NA	NA
NA	PIGC	NA	NA	NA	NA	NA	NA	NA	NA	NA	NA	NA	NA	NA
NA	PIGW	NA	NA	NA	NA	NA	NA	NA	NA	NA	NA	NA	NA	NA
NA	PIGX	NA	NA	NA	NA	NA	NA	NA	NA	NA	NA	NA	NA	NA
NA	PIH1D2	NA	NA	NA	NA	NA	NA	NA	NA	NA	NA	NA	NA	NA
NA	PIK3R4	NA	NA	NA	NA	NA	NA	NA	NA	NA	NA	NA	NA	NA
NA	PIKFYVE	NA	NA	NA	NA	NA	NA	NA	NA	NA	NA	NA	NA	NA
NA	PIM1	NA	NA	NA	NA	NA	NA	NA	NA	NA	NA	NA	NA	NA
NA	PINX1	NA	NA	NA	NA	NA	NA	NA	NA	NA	NA	NA	NA	NA
NA	PIP4K2A	NA	NA	NA	NA	NA	NA	NA	NA	NA	NA	NA	NA	NA
NA	PITPNB	NA	NA	NA	NA	NA	NA	NA	NA	NA	NA	NA	NA	NA
NA	PITPNM2	NA	NA	NA	NA	NA	NA	NA	NA	NA	NA	NA	NA	NA
NA	PKDCC	NA	NA	NA	NA	NA	NA	NA	NA	NA	NA	NA	NA	NA
NA	PKMYT1	NA	NA	NA	NA	NA	NA	NA	NA	NA	NA	NA	NA	NA
NA	PKN3	NA	NA	NA	NA	NA	NA	NA	NA	NA	NA	NA	NA	NA
NA	PLA2G4A	NA	NA	NA	NA	NA	NA	NA	NA	NA	NA	NA	NA	NA
NA	PLAGL2	NA	NA	NA	NA	NA	NA	NA	NA	NA	NA	NA	NA	NA
NA	PLCB1	NA	NA	NA	NA	NA	NA	NA	NA	NA	NA	NA	NA	NA
NA	PLCG1	NA	NA	NA	NA	NA	NA	NA	NA	NA	NA	NA	NA	NA
NA	PLCXD1	NA	NA	NA	NA	NA	NA	NA	NA	NA	NA	NA	NA	NA
NA	PLEKHA5	NA	NA	NA	NA	NA	NA	NA	NA	NA	NA	NA	NA	NA
NA	PLEKHG4	NA	NA	NA	NA	NA	NA	NA	NA	NA	NA	NA	NA	NA
NA	PLEKHG4B	NA	NA	NA	NA	NA	NA	NA	NA	NA	NA	NA	NA	NA
NA	PLEKHO1	NA	NA	NA	NA	NA	NA	NA	NA	NA	NA	NA	NA	NA
NA	PLK1	NA	NA	NA	NA	NA	NA	NA	NA	NA	NA	NA	NA	NA
NA	PLK4	NA	NA	NA	NA	NA	NA	NA	NA	NA	NA	NA	NA	NA
NA	PLRG1	NA	NA	NA	NA	NA	NA	NA	NA	NA	NA	NA	NA	NA
NA	PLSCR1	NA	NA	NA	NA	NA	NA	NA	NA	NA	NA	NA	NA	NA
NA	PM20D2	NA	NA	NA	NA	NA	NA	NA	NA	NA	NA	NA	NA	NA
NA	PMS1	NA	NA	NA	NA	NA	NA	NA	NA	NA	NA	NA	NA	NA
NA	PNMA1	NA	NA	NA	NA	NA	NA	NA	NA	NA	NA	NA	NA	NA
NA	PNN	NA	NA	NA	NA	NA	NA	NA	NA	NA	NA	NA	NA	NA
NA	PNPT1	NA	NA	NA	NA	NA	NA	NA	NA	NA	NA	NA	NA	NA
NA	POC1A	NA	NA	NA	NA	NA	NA	NA	NA	NA	NA	NA	NA	NA
NA	POC5	NA	NA	NA	NA	NA	NA	NA	NA	NA	NA	NA	NA	NA
NA	POGK	NA	NA	NA	NA	NA	NA	NA	NA	NA	NA	NA	NA	NA
NA	POGZ	NA	NA	NA	NA	NA	NA	NA	NA	NA	NA	NA	NA	NA
NA	POLA1	NA	NA	NA	NA	NA	NA	NA	NA	NA	NA	NA	NA	NA
NA	POLA2	NA	NA	NA	NA	NA	NA	NA	NA	NA	NA	NA	NA	NA
NA	POLD1	NA	NA	NA	NA	NA	NA	NA	NA	NA	NA	NA	NA	NA
NA	POLD2	NA	NA	NA	NA	NA	NA	NA	NA	NA	NA	NA	NA	NA
NA	POLD3	NA	NA	NA	NA	NA	NA	NA	NA	NA	NA	NA	NA	NA
NA	POLDIP3	NA	NA	NA	NA	NA	NA	NA	NA	NA	NA	NA	NA	NA
NA	POLE	NA	NA	NA	NA	NA	NA	NA	NA	NA	NA	NA	NA	NA
NA	POLE2	NA	NA	NA	NA	NA	NA	NA	NA	NA	NA	NA	NA	NA
NA	POLG2	NA	NA	NA	NA	NA	NA	NA	NA	NA	NA	NA	NA	NA
NA	POLQ	NA	NA	NA	NA	NA	NA	NA	NA	NA	NA	NA	NA	NA
NA	POLR1A	NA	NA	NA	NA	NA	NA	NA	NA	NA	NA	NA	NA	NA
NA	POLR1B	NA	NA	NA	NA	NA	NA	NA	NA	NA	NA	NA	NA	NA
NA	POLR1C	NA	NA	NA	NA	NA	NA	NA	NA	NA	NA	NA	NA	NA
NA	POLR1E	NA	NA	NA	NA	NA	NA	NA	NA	NA	NA	NA	NA	NA
NA	POLR2B	NA	NA	NA	NA	NA	NA	NA	NA	NA	NA	NA	NA	NA
NA	POLR2C	NA	NA	NA	NA	NA	NA	NA	NA	NA	NA	NA	NA	NA
NA	POLR2D	NA	NA	NA	NA	NA	NA	NA	NA	NA	NA	NA	NA	NA
NA	POP1	NA	NA	NA	NA	NA	NA	NA	NA	NA	NA	NA	NA	NA
NA	POP5	NA	NA	NA	NA	NA	NA	NA	NA	NA	NA	NA	NA	NA
NA	POP7	NA	NA	NA	NA	NA	NA	NA	NA	NA	NA	NA	NA	NA
NA	POSTN	NA	NA	NA	NA	NA	NA	NA	NA	NA	NA	NA	NA	NA
NA	POT1	NA	NA	NA	NA	NA	NA	NA	NA	NA	NA	NA	NA	NA
NA	POU6F1	NA	NA	NA	NA	NA	NA	NA	NA	NA	NA	NA	NA	NA
NA	PPARD	NA	NA	NA	NA	NA	NA	NA	NA	NA	NA	NA	NA	NA
NA	PPARG	NA	NA	NA	NA	NA	NA	NA	NA	NA	NA	NA	NA	NA
NA	PPAT	NA	NA	NA	NA	NA	NA	NA	NA	NA	NA	NA	NA	NA
NA	PPID	NA	NA	NA	NA	NA	NA	NA	NA	NA	NA	NA	NA	NA
NA	PPIF	NA	NA	NA	NA	NA	NA	NA	NA	NA	NA	NA	NA	NA
NA	PPIG	NA	NA	NA	NA	NA	NA	NA	NA	NA	NA	NA	NA	NA
NA	PPIH	NA	NA	NA	NA	NA	NA	NA	NA	NA	NA	NA	NA	NA
NA	PPIL1	NA	NA	NA	NA	NA	NA	NA	NA	NA	NA	NA	NA	NA
NA	PPIL3	NA	NA	NA	NA	NA	NA	NA	NA	NA	NA	NA	NA	NA
NA	PPM1B	NA	NA	NA	NA	NA	NA	NA	NA	NA	NA	NA	NA	NA
NA	PPM1G	NA	NA	NA	NA	NA	NA	NA	NA	NA	NA	NA	NA	NA
NA	PPP1CC	NA	NA	NA	NA	NA	NA	NA	NA	NA	NA	NA	NA	NA
NA	PPP1R8	NA	NA	NA	NA	NA	NA	NA	NA	NA	NA	NA	NA	NA
NA	PPP2R3A	NA	NA	NA	NA	NA	NA	NA	NA	NA	NA	NA	NA	NA
NA	PPP2R5D	NA	NA	NA	NA	NA	NA	NA	NA	NA	NA	NA	NA	NA
NA	PPP5C	NA	NA	NA	NA	NA	NA	NA	NA	NA	NA	NA	NA	NA
NA	PPRC1	NA	NA	NA	NA	NA	NA	NA	NA	NA	NA	NA	NA	NA
NA	PPT1	NA	NA	NA	NA	NA	NA	NA	NA	NA	NA	NA	NA	NA
NA	PPWD1	NA	NA	NA	NA	NA	NA	NA	NA	NA	NA	NA	NA	NA
NA	PRC1	NA	NA	NA	NA	NA	NA	NA	NA	NA	NA	NA	NA	NA
NA	PRDM10	NA	NA	NA	NA	NA	NA	NA	NA	NA	NA	NA	NA	NA
NA	PRDM2	NA	NA	NA	NA	NA	NA	NA	NA	NA	NA	NA	NA	NA
NA	PRDM4	NA	NA	NA	NA	NA	NA	NA	NA	NA	NA	NA	NA	NA
NA	PRDM5	NA	NA	NA	NA	NA	NA	NA	NA	NA	NA	NA	NA	NA
NA	PRDM6	NA	NA	NA	NA	NA	NA	NA	NA	NA	NA	NA	NA	NA
NA	PRDM8	NA	NA	NA	NA	NA	NA	NA	NA	NA	NA	NA	NA	NA
NA	PRELID1	NA	NA	NA	NA	NA	NA	NA	NA	NA	NA	NA	NA	NA
NA	PRIM1	NA	NA	NA	NA	NA	NA	NA	NA	NA	NA	NA	NA	NA
NA	PRIM2	NA	NA	NA	NA	NA	NA	NA	NA	NA	NA	NA	NA	NA
NA	PRKAR2B	NA	NA	NA	NA	NA	NA	NA	NA	NA	NA	NA	NA	NA
NA	PRKCA	NA	NA	NA	NA	NA	NA	NA	NA	NA	NA	NA	NA	NA
NA	PRKD3	NA	NA	NA	NA	NA	NA	NA	NA	NA	NA	NA	NA	NA
NA	PRKDC	NA	NA	NA	NA	NA	NA	NA	NA	NA	NA	NA	NA	NA
NA	PRMT1	NA	NA	NA	NA	NA	NA	NA	NA	NA	NA	NA	NA	NA
NA	PRMT3	NA	NA	NA	NA	NA	NA	NA	NA	NA	NA	NA	NA	NA
NA	PRMT6	NA	NA	NA	NA	NA	NA	NA	NA	NA	NA	NA	NA	NA
NA	PRMT7	NA	NA	NA	NA	NA	NA	NA	NA	NA	NA	NA	NA	NA
NA	PRPF19	NA	NA	NA	NA	NA	NA	NA	NA	NA	NA	NA	NA	NA
NA	PRPF3	NA	NA	NA	NA	NA	NA	NA	NA	NA	NA	NA	NA	NA
NA	PRPF31	NA	NA	NA	NA	NA	NA	NA	NA	NA	NA	NA	NA	NA
NA	PRPF38A	NA	NA	NA	NA	NA	NA	NA	NA	NA	NA	NA	NA	NA
NA	PRPF38B	NA	NA	NA	NA	NA	NA	NA	NA	NA	NA	NA	NA	NA
NA	PRPF4	NA	NA	NA	NA	NA	NA	NA	NA	NA	NA	NA	NA	NA
NA	PRPF40A	NA	NA	NA	NA	NA	NA	NA	NA	NA	NA	NA	NA	NA
NA	PRPF8	NA	NA	NA	NA	NA	NA	NA	NA	NA	NA	NA	NA	NA
NA	PRPH2	NA	NA	NA	NA	NA	NA	NA	NA	NA	NA	NA	NA	NA
NA	PRPS2	NA	NA	NA	NA	NA	NA	NA	NA	NA	NA	NA	NA	NA
NA	PRR11	NA	NA	NA	NA	NA	NA	NA	NA	NA	NA	NA	NA	NA
NA	PRR12	NA	NA	NA	NA	NA	NA	NA	NA	NA	NA	NA	NA	NA
NA	PRR14	NA	NA	NA	NA	NA	NA	NA	NA	NA	NA	NA	NA	NA
NA	PRR16	NA	NA	NA	NA	NA	NA	NA	NA	NA	NA	NA	NA	NA
NA	PRR3	NA	NA	NA	NA	NA	NA	NA	NA	NA	NA	NA	NA	NA
NA	PRRT2	NA	NA	NA	NA	NA	NA	NA	NA	NA	NA	NA	NA	NA
NA	PRRX1	NA	NA	NA	NA	NA	NA	NA	NA	NA	NA	NA	NA	NA
NA	PRSS12	NA	NA	NA	NA	NA	NA	NA	NA	NA	NA	NA	NA	NA
NA	PRTFDC1	NA	NA	NA	NA	NA	NA	NA	NA	NA	NA	NA	NA	NA
NA	PRTG	NA	NA	NA	NA	NA	NA	NA	NA	NA	NA	NA	NA	NA
NA	PSD3	NA	NA	NA	NA	NA	NA	NA	NA	NA	NA	NA	NA	NA
NA	PSIP1	NA	NA	NA	NA	NA	NA	NA	NA	NA	NA	NA	NA	NA
NA	PSMA4	NA	NA	NA	NA	NA	NA	NA	NA	NA	NA	NA	NA	NA
NA	PSMC3	NA	NA	NA	NA	NA	NA	NA	NA	NA	NA	NA	NA	NA
NA	PSMC3IP	NA	NA	NA	NA	NA	NA	NA	NA	NA	NA	NA	NA	NA
NA	PSMC6	NA	NA	NA	NA	NA	NA	NA	NA	NA	NA	NA	NA	NA
NA	PSMG2	NA	NA	NA	NA	NA	NA	NA	NA	NA	NA	NA	NA	NA
NA	PSPH	NA	NA	NA	NA	NA	NA	NA	NA	NA	NA	NA	NA	NA
NA	PSRC1	NA	NA	NA	NA	NA	NA	NA	NA	NA	NA	NA	NA	NA
NA	PTBP1	NA	NA	NA	NA	NA	NA	NA	NA	NA	NA	NA	NA	NA
NA	PTBP2	NA	NA	NA	NA	NA	NA	NA	NA	NA	NA	NA	NA	NA
NA	PTCD2	NA	NA	NA	NA	NA	NA	NA	NA	NA	NA	NA	NA	NA
NA	PTCD3	NA	NA	NA	NA	NA	NA	NA	NA	NA	NA	NA	NA	NA
NA	PTCH1	NA	NA	NA	NA	NA	NA	NA	NA	NA	NA	NA	NA	NA
NA	PTCH2	NA	NA	NA	NA	NA	NA	NA	NA	NA	NA	NA	NA	NA
NA	PTER	NA	NA	NA	NA	NA	NA	NA	NA	NA	NA	NA	NA	NA
NA	PTGER2	NA	NA	NA	NA	NA	NA	NA	NA	NA	NA	NA	NA	NA
NA	PTMA	NA	NA	NA	NA	NA	NA	NA	NA	NA	NA	NA	NA	NA
NA	PTN	NA	NA	NA	NA	NA	NA	NA	NA	NA	NA	NA	NA	NA
NA	PTPN18	NA	NA	NA	NA	NA	NA	NA	NA	NA	NA	NA	NA	NA
NA	PTPN2	NA	NA	NA	NA	NA	NA	NA	NA	NA	NA	NA	NA	NA
NA	PTPRN	NA	NA	NA	NA	NA	NA	NA	NA	NA	NA	NA	NA	NA
NA	PTX3	NA	NA	NA	NA	NA	NA	NA	NA	NA	NA	NA	NA	NA
NA	PUM2	NA	NA	NA	NA	NA	NA	NA	NA	NA	NA	NA	NA	NA
NA	PUS1	NA	NA	NA	NA	NA	NA	NA	NA	NA	NA	NA	NA	NA
NA	PUS7	NA	NA	NA	NA	NA	NA	NA	NA	NA	NA	NA	NA	NA
NA	PXK	NA	NA	NA	NA	NA	NA	NA	NA	NA	NA	NA	NA	NA
NA	PXMP2	NA	NA	NA	NA	NA	NA	NA	NA	NA	NA	NA	NA	NA
NA	PXMP4	NA	NA	NA	NA	NA	NA	NA	NA	NA	NA	NA	NA	NA
NA	PYGO1	NA	NA	NA	NA	NA	NA	NA	NA	NA	NA	NA	NA	NA
NA	PYGO2	NA	NA	NA	NA	NA	NA	NA	NA	NA	NA	NA	NA	NA
NA	QRICH1	NA	NA	NA	NA	NA	NA	NA	NA	NA	NA	NA	NA	NA
NA	QRSL1	NA	NA	NA	NA	NA	NA	NA	NA	NA	NA	NA	NA	NA
NA	QSER1	NA	NA	NA	NA	NA	NA	NA	NA	NA	NA	NA	NA	NA
NA	R3HDM1	NA	NA	NA	NA	NA	NA	NA	NA	NA	NA	NA	NA	NA
NA	R3HDM2	NA	NA	NA	NA	NA	NA	NA	NA	NA	NA	NA	NA	NA
NA	RAB38	NA	NA	NA	NA	NA	NA	NA	NA	NA	NA	NA	NA	NA
NA	RAB8B	NA	NA	NA	NA	NA	NA	NA	NA	NA	NA	NA	NA	NA
NA	RABGGTB	NA	NA	NA	NA	NA	NA	NA	NA	NA	NA	NA	NA	NA
NA	RABL3	NA	NA	NA	NA	NA	NA	NA	NA	NA	NA	NA	NA	NA
NA	RACGAP1	NA	NA	NA	NA	NA	NA	NA	NA	NA	NA	NA	NA	NA
NA	RAD1	NA	NA	NA	NA	NA	NA	NA	NA	NA	NA	NA	NA	NA
NA	RAD18	NA	NA	NA	NA	NA	NA	NA	NA	NA	NA	NA	NA	NA
NA	RAD21	NA	NA	NA	NA	NA	NA	NA	NA	NA	NA	NA	NA	NA
NA	RAD23A	NA	NA	NA	NA	NA	NA	NA	NA	NA	NA	NA	NA	NA
NA	RAD51	NA	NA	NA	NA	NA	NA	NA	NA	NA	NA	NA	NA	NA
NA	RAD51AP1	NA	NA	NA	NA	NA	NA	NA	NA	NA	NA	NA	NA	NA
NA	RAD51C	NA	NA	NA	NA	NA	NA	NA	NA	NA	NA	NA	NA	NA
NA	RAD54L	NA	NA	NA	NA	NA	NA	NA	NA	NA	NA	NA	NA	NA
NA	RAE1	NA	NA	NA	NA	NA	NA	NA	NA	NA	NA	NA	NA	NA
NA	RALGAPA2	NA	NA	NA	NA	NA	NA	NA	NA	NA	NA	NA	NA	NA
NA	RALGPS2	NA	NA	NA	NA	NA	NA	NA	NA	NA	NA	NA	NA	NA
NA	RANBP1	NA	NA	NA	NA	NA	NA	NA	NA	NA	NA	NA	NA	NA
NA	RANGAP1	NA	NA	NA	NA	NA	NA	NA	NA	NA	NA	NA	NA	NA
NA	RANGRF	NA	NA	NA	NA	NA	NA	NA	NA	NA	NA	NA	NA	NA
NA	RAPGEF4	NA	NA	NA	NA	NA	NA	NA	NA	NA	NA	NA	NA	NA
NA	RAVER1	NA	NA	NA	NA	NA	NA	NA	NA	NA	NA	NA	NA	NA
NA	RBBP4	NA	NA	NA	NA	NA	NA	NA	NA	NA	NA	NA	NA	NA
NA	RBBP5	NA	NA	NA	NA	NA	NA	NA	NA	NA	NA	NA	NA	NA
NA	RBBP6	NA	NA	NA	NA	NA	NA	NA	NA	NA	NA	NA	NA	NA
NA	RBBP7	NA	NA	NA	NA	NA	NA	NA	NA	NA	NA	NA	NA	NA
NA	RBBP8	NA	NA	NA	NA	NA	NA	NA	NA	NA	NA	NA	NA	NA
NA	RBL1	NA	NA	NA	NA	NA	NA	NA	NA	NA	NA	NA	NA	NA
NA	RBM10	NA	NA	NA	NA	NA	NA	NA	NA	NA	NA	NA	NA	NA
NA	RBM12B	NA	NA	NA	NA	NA	NA	NA	NA	NA	NA	NA	NA	NA
NA	RBM14	NA	NA	NA	NA	NA	NA	NA	NA	NA	NA	NA	NA	NA
NA	RBM15	NA	NA	NA	NA	NA	NA	NA	NA	NA	NA	NA	NA	NA
NA	RBM15B	NA	NA	NA	NA	NA	NA	NA	NA	NA	NA	NA	NA	NA
NA	RBM19	NA	NA	NA	NA	NA	NA	NA	NA	NA	NA	NA	NA	NA
NA	RBM22	NA	NA	NA	NA	NA	NA	NA	NA	NA	NA	NA	NA	NA
NA	RBM23	NA	NA	NA	NA	NA	NA	NA	NA	NA	NA	NA	NA	NA
NA	RBM26	NA	NA	NA	NA	NA	NA	NA	NA	NA	NA	NA	NA	NA
NA	RBM27	NA	NA	NA	NA	NA	NA	NA	NA	NA	NA	NA	NA	NA
NA	RBM28	NA	NA	NA	NA	NA	NA	NA	NA	NA	NA	NA	NA	NA
NA	RBM33	NA	NA	NA	NA	NA	NA	NA	NA	NA	NA	NA	NA	NA
NA	RBM38	NA	NA	NA	NA	NA	NA	NA	NA	NA	NA	NA	NA	NA
NA	RBM39	NA	NA	NA	NA	NA	NA	NA	NA	NA	NA	NA	NA	NA
NA	RBM43	NA	NA	NA	NA	NA	NA	NA	NA	NA	NA	NA	NA	NA
NA	RBMS3	NA	NA	NA	NA	NA	NA	NA	NA	NA	NA	NA	NA	NA
NA	RBPMS2	NA	NA	NA	NA	NA	NA	NA	NA	NA	NA	NA	NA	NA
NA	RCC2	NA	NA	NA	NA	NA	NA	NA	NA	NA	NA	NA	NA	NA
NA	RCCD1	NA	NA	NA	NA	NA	NA	NA	NA	NA	NA	NA	NA	NA
NA	RCL1	NA	NA	NA	NA	NA	NA	NA	NA	NA	NA	NA	NA	NA
NA	RCOR2	NA	NA	NA	NA	NA	NA	NA	NA	NA	NA	NA	NA	NA
NA	RECQL4	NA	NA	NA	NA	NA	NA	NA	NA	NA	NA	NA	NA	NA
NA	REEP4	NA	NA	NA	NA	NA	NA	NA	NA	NA	NA	NA	NA	NA
NA	REL	NA	NA	NA	NA	NA	NA	NA	NA	NA	NA	NA	NA	NA
NA	RELN	NA	NA	NA	NA	NA	NA	NA	NA	NA	NA	NA	NA	NA
NA	REPIN1	NA	NA	NA	NA	NA	NA	NA	NA	NA	NA	NA	NA	NA
NA	REXO1	NA	NA	NA	NA	NA	NA	NA	NA	NA	NA	NA	NA	NA
NA	RFC1	NA	NA	NA	NA	NA	NA	NA	NA	NA	NA	NA	NA	NA
NA	RFC2	NA	NA	NA	NA	NA	NA	NA	NA	NA	NA	NA	NA	NA
NA	RFC3	NA	NA	NA	NA	NA	NA	NA	NA	NA	NA	NA	NA	NA
NA	RFC4	NA	NA	NA	NA	NA	NA	NA	NA	NA	NA	NA	NA	NA
NA	RFC5	NA	NA	NA	NA	NA	NA	NA	NA	NA	NA	NA	NA	NA
NA	RFT1	NA	NA	NA	NA	NA	NA	NA	NA	NA	NA	NA	NA	NA
NA	RFWD3	NA	NA	NA	NA	NA	NA	NA	NA	NA	NA	NA	NA	NA
NA	RFX3	NA	NA	NA	NA	NA	NA	NA	NA	NA	NA	NA	NA	NA
NA	RFXAP	NA	NA	NA	NA	NA	NA	NA	NA	NA	NA	NA	NA	NA
NA	RGS12	NA	NA	NA	NA	NA	NA	NA	NA	NA	NA	NA	NA	NA
NA	RGS17	NA	NA	NA	NA	NA	NA	NA	NA	NA	NA	NA	NA	NA
NA	RGS20	NA	NA	NA	NA	NA	NA	NA	NA	NA	NA	NA	NA	NA
NA	RHOBTB2	NA	NA	NA	NA	NA	NA	NA	NA	NA	NA	NA	NA	NA
NA	RIBC2	NA	NA	NA	NA	NA	NA	NA	NA	NA	NA	NA	NA	NA
NA	RIF1	NA	NA	NA	NA	NA	NA	NA	NA	NA	NA	NA	NA	NA
NA	RIN1	NA	NA	NA	NA	NA	NA	NA	NA	NA	NA	NA	NA	NA
NA	RIOK1	NA	NA	NA	NA	NA	NA	NA	NA	NA	NA	NA	NA	NA
NA	RMI1	NA	NA	NA	NA	NA	NA	NA	NA	NA	NA	NA	NA	NA
NA	RMND5B	NA	NA	NA	NA	NA	NA	NA	NA	NA	NA	NA	NA	NA
NA	RNASEH2A	NA	NA	NA	NA	NA	NA	NA	NA	NA	NA	NA	NA	NA
NA	RNASEH2B	NA	NA	NA	NA	NA	NA	NA	NA	NA	NA	NA	NA	NA
NA	RNF114	NA	NA	NA	NA	NA	NA	NA	NA	NA	NA	NA	NA	NA
NA	RNF138	NA	NA	NA	NA	NA	NA	NA	NA	NA	NA	NA	NA	NA
NA	RNF168	NA	NA	NA	NA	NA	NA	NA	NA	NA	NA	NA	NA	NA
NA	RNF2	NA	NA	NA	NA	NA	NA	NA	NA	NA	NA	NA	NA	NA
NA	RNF214	NA	NA	NA	NA	NA	NA	NA	NA	NA	NA	NA	NA	NA
NA	RNF219	NA	NA	NA	NA	NA	NA	NA	NA	NA	NA	NA	NA	NA
NA	RNF220	NA	NA	NA	NA	NA	NA	NA	NA	NA	NA	NA	NA	NA
NA	RNF26	NA	NA	NA	NA	NA	NA	NA	NA	NA	NA	NA	NA	NA
NA	RNF34	NA	NA	NA	NA	NA	NA	NA	NA	NA	NA	NA	NA	NA
NA	RNF40	NA	NA	NA	NA	NA	NA	NA	NA	NA	NA	NA	NA	NA
NA	RNFT2	NA	NA	NA	NA	NA	NA	NA	NA	NA	NA	NA	NA	NA
NA	RNGTT	NA	NA	NA	NA	NA	NA	NA	NA	NA	NA	NA	NA	NA
NA	ROR2	NA	NA	NA	NA	NA	NA	NA	NA	NA	NA	NA	NA	NA
NA	RPA2	NA	NA	NA	NA	NA	NA	NA	NA	NA	NA	NA	NA	NA
NA	RPA3	NA	NA	NA	NA	NA	NA	NA	NA	NA	NA	NA	NA	NA
NA	RPAP1	NA	NA	NA	NA	NA	NA	NA	NA	NA	NA	NA	NA	NA
NA	RPAP3	NA	NA	NA	NA	NA	NA	NA	NA	NA	NA	NA	NA	NA
NA	RPF2	NA	NA	NA	NA	NA	NA	NA	NA	NA	NA	NA	NA	NA
NA	RPIA	NA	NA	NA	NA	NA	NA	NA	NA	NA	NA	NA	NA	NA
NA	RPL10A	NA	NA	NA	NA	NA	NA	NA	NA	NA	NA	NA	NA	NA
NA	RPL13	NA	NA	NA	NA	NA	NA	NA	NA	NA	NA	NA	NA	NA
NA	RPL22L1	NA	NA	NA	NA	NA	NA	NA	NA	NA	NA	NA	NA	NA
NA	RPL26L1	NA	NA	NA	NA	NA	NA	NA	NA	NA	NA	NA	NA	NA
NA	RPL27A	NA	NA	NA	NA	NA	NA	NA	NA	NA	NA	NA	NA	NA
NA	RPL39L	NA	NA	NA	NA	NA	NA	NA	NA	NA	NA	NA	NA	NA
NA	RPL7L1	NA	NA	NA	NA	NA	NA	NA	NA	NA	NA	NA	NA	NA
NA	RPP14	NA	NA	NA	NA	NA	NA	NA	NA	NA	NA	NA	NA	NA
NA	RPP25	NA	NA	NA	NA	NA	NA	NA	NA	NA	NA	NA	NA	NA
NA	RPP30	NA	NA	NA	NA	NA	NA	NA	NA	NA	NA	NA	NA	NA
NA	RPS15	NA	NA	NA	NA	NA	NA	NA	NA	NA	NA	NA	NA	NA
NA	RPS25	NA	NA	NA	NA	NA	NA	NA	NA	NA	NA	NA	NA	NA
NA	RPS3A	NA	NA	NA	NA	NA	NA	NA	NA	NA	NA	NA	NA	NA
NA	RPS4X	NA	NA	NA	NA	NA	NA	NA	NA	NA	NA	NA	NA	NA
NA	RPS6KA1	NA	NA	NA	NA	NA	NA	NA	NA	NA	NA	NA	NA	NA
NA	RPS6KA5	NA	NA	NA	NA	NA	NA	NA	NA	NA	NA	NA	NA	NA
NA	RPS7	NA	NA	NA	NA	NA	NA	NA	NA	NA	NA	NA	NA	NA
NA	RPS9	NA	NA	NA	NA	NA	NA	NA	NA	NA	NA	NA	NA	NA
NA	RPTOR	NA	NA	NA	NA	NA	NA	NA	NA	NA	NA	NA	NA	NA
NA	RPUSD4	NA	NA	NA	NA	NA	NA	NA	NA	NA	NA	NA	NA	NA
NA	RRM1	NA	NA	NA	NA	NA	NA	NA	NA	NA	NA	NA	NA	NA
NA	RRM2	NA	NA	NA	NA	NA	NA	NA	NA	NA	NA	NA	NA	NA
NA	RRP1	NA	NA	NA	NA	NA	NA	NA	NA	NA	NA	NA	NA	NA
NA	RRP15	NA	NA	NA	NA	NA	NA	NA	NA	NA	NA	NA	NA	NA
NA	RRP1B	NA	NA	NA	NA	NA	NA	NA	NA	NA	NA	NA	NA	NA
NA	RRP36	NA	NA	NA	NA	NA	NA	NA	NA	NA	NA	NA	NA	NA
NA	RRP7A	NA	NA	NA	NA	NA	NA	NA	NA	NA	NA	NA	NA	NA
NA	RRP8	NA	NA	NA	NA	NA	NA	NA	NA	NA	NA	NA	NA	NA
NA	RRP9	NA	NA	NA	NA	NA	NA	NA	NA	NA	NA	NA	NA	NA
NA	RSBN1L	NA	NA	NA	NA	NA	NA	NA	NA	NA	NA	NA	NA	NA
NA	RSL1D1	NA	NA	NA	NA	NA	NA	NA	NA	NA	NA	NA	NA	NA
NA	RSL24D1	NA	NA	NA	NA	NA	NA	NA	NA	NA	NA	NA	NA	NA
NA	RSRC1	NA	NA	NA	NA	NA	NA	NA	NA	NA	NA	NA	NA	NA
NA	RSRC2	NA	NA	NA	NA	NA	NA	NA	NA	NA	NA	NA	NA	NA
NA	RTF1	NA	NA	NA	NA	NA	NA	NA	NA	NA	NA	NA	NA	NA
NA	RTKN2	NA	NA	NA	NA	NA	NA	NA	NA	NA	NA	NA	NA	NA
NA	RTN4IP1	NA	NA	NA	NA	NA	NA	NA	NA	NA	NA	NA	NA	NA
NA	RTTN	NA	NA	NA	NA	NA	NA	NA	NA	NA	NA	NA	NA	NA
NA	RUNX1T1	NA	NA	NA	NA	NA	NA	NA	NA	NA	NA	NA	NA	NA
NA	RUNX2	NA	NA	NA	NA	NA	NA	NA	NA	NA	NA	NA	NA	NA
NA	RUVBL1	NA	NA	NA	NA	NA	NA	NA	NA	NA	NA	NA	NA	NA
NA	RUVBL2	NA	NA	NA	NA	NA	NA	NA	NA	NA	NA	NA	NA	NA
NA	RXRA	NA	NA	NA	NA	NA	NA	NA	NA	NA	NA	NA	NA	NA
NA	S100A3	NA	NA	NA	NA	NA	NA	NA	NA	NA	NA	NA	NA	NA
NA	SAAL1	NA	NA	NA	NA	NA	NA	NA	NA	NA	NA	NA	NA	NA
NA	SACS	NA	NA	NA	NA	NA	NA	NA	NA	NA	NA	NA	NA	NA
NA	SAE1	NA	NA	NA	NA	NA	NA	NA	NA	NA	NA	NA	NA	NA
NA	SAFB	NA	NA	NA	NA	NA	NA	NA	NA	NA	NA	NA	NA	NA
NA	SALL2	NA	NA	NA	NA	NA	NA	NA	NA	NA	NA	NA	NA	NA
NA	SAMHD1	NA	NA	NA	NA	NA	NA	NA	NA	NA	NA	NA	NA	NA
NA	SAP130	NA	NA	NA	NA	NA	NA	NA	NA	NA	NA	NA	NA	NA
NA	SARS2	NA	NA	NA	NA	NA	NA	NA	NA	NA	NA	NA	NA	NA
NA	SART1	NA	NA	NA	NA	NA	NA	NA	NA	NA	NA	NA	NA	NA
NA	SART3	NA	NA	NA	NA	NA	NA	NA	NA	NA	NA	NA	NA	NA
NA	SASS6	NA	NA	NA	NA	NA	NA	NA	NA	NA	NA	NA	NA	NA
NA	SBF2	NA	NA	NA	NA	NA	NA	NA	NA	NA	NA	NA	NA	NA
NA	SCAI	NA	NA	NA	NA	NA	NA	NA	NA	NA	NA	NA	NA	NA
NA	SCARA3	NA	NA	NA	NA	NA	NA	NA	NA	NA	NA	NA	NA	NA
NA	SCARNA10	NA	NA	NA	NA	NA	NA	NA	NA	NA	NA	NA	NA	NA
NA	SCARNA9L	NA	NA	NA	NA	NA	NA	NA	NA	NA	NA	NA	NA	NA
NA	SCD	NA	NA	NA	NA	NA	NA	NA	NA	NA	NA	NA	NA	NA
NA	SCLT1	NA	NA	NA	NA	NA	NA	NA	NA	NA	NA	NA	NA	NA
NA	SCMH1	NA	NA	NA	NA	NA	NA	NA	NA	NA	NA	NA	NA	NA
NA	SCML1	NA	NA	NA	NA	NA	NA	NA	NA	NA	NA	NA	NA	NA
NA	SCML2	NA	NA	NA	NA	NA	NA	NA	NA	NA	NA	NA	NA	NA
NA	SDC1	NA	NA	NA	NA	NA	NA	NA	NA	NA	NA	NA	NA	NA
NA	SECISBP2	NA	NA	NA	NA	NA	NA	NA	NA	NA	NA	NA	NA	NA
NA	SEH1L	NA	NA	NA	NA	NA	NA	NA	NA	NA	NA	NA	NA	NA
NA	SELENBP1	NA	NA	NA	NA	NA	NA	NA	NA	NA	NA	NA	NA	NA
NA	SEMA3A	NA	NA	NA	NA	NA	NA	NA	NA	NA	NA	NA	NA	NA
NA	SEMA3D	NA	NA	NA	NA	NA	NA	NA	NA	NA	NA	NA	NA	NA
NA	SEMA4C	NA	NA	NA	NA	NA	NA	NA	NA	NA	NA	NA	NA	NA
NA	SEMA4D	NA	NA	NA	NA	NA	NA	NA	NA	NA	NA	NA	NA	NA
NA	SENP1	NA	NA	NA	NA	NA	NA	NA	NA	NA	NA	NA	NA	NA
NA	SENP7	NA	NA	NA	NA	NA	NA	NA	NA	NA	NA	NA	NA	NA
NA	SEPHS1	NA	NA	NA	NA	NA	NA	NA	NA	NA	NA	NA	NA	NA
NA	SEPSECS	NA	NA	NA	NA	NA	NA	NA	NA	NA	NA	NA	NA	NA
NA	SERP2	NA	NA	NA	NA	NA	NA	NA	NA	NA	NA	NA	NA	NA
NA	SESTD1	NA	NA	NA	NA	NA	NA	NA	NA	NA	NA	NA	NA	NA
NA	SET	NA	NA	NA	NA	NA	NA	NA	NA	NA	NA	NA	NA	NA
NA	SETD1A	NA	NA	NA	NA	NA	NA	NA	NA	NA	NA	NA	NA	NA
NA	SETD1B	NA	NA	NA	NA	NA	NA	NA	NA	NA	NA	NA	NA	NA
NA	SETD2	NA	NA	NA	NA	NA	NA	NA	NA	NA	NA	NA	NA	NA
NA	SETDB1	NA	NA	NA	NA	NA	NA	NA	NA	NA	NA	NA	NA	NA
NA	SETDB2	NA	NA	NA	NA	NA	NA	NA	NA	NA	NA	NA	NA	NA
NA	SETMAR	NA	NA	NA	NA	NA	NA	NA	NA	NA	NA	NA	NA	NA
NA	SF1	NA	NA	NA	NA	NA	NA	NA	NA	NA	NA	NA	NA	NA
NA	SF3A1	NA	NA	NA	NA	NA	NA	NA	NA	NA	NA	NA	NA	NA
NA	SF3A2	NA	NA	NA	NA	NA	NA	NA	NA	NA	NA	NA	NA	NA
NA	SF3A3	NA	NA	NA	NA	NA	NA	NA	NA	NA	NA	NA	NA	NA
NA	SF3B2	NA	NA	NA	NA	NA	NA	NA	NA	NA	NA	NA	NA	NA
NA	SF3B3	NA	NA	NA	NA	NA	NA	NA	NA	NA	NA	NA	NA	NA
NA	SF3B4	NA	NA	NA	NA	NA	NA	NA	NA	NA	NA	NA	NA	NA
NA	SFMBT1	NA	NA	NA	NA	NA	NA	NA	NA	NA	NA	NA	NA	NA
NA	SFMBT2	NA	NA	NA	NA	NA	NA	NA	NA	NA	NA	NA	NA	NA
NA	SFPQ	NA	NA	NA	NA	NA	NA	NA	NA	NA	NA	NA	NA	NA
NA	SFSWAP	NA	NA	NA	NA	NA	NA	NA	NA	NA	NA	NA	NA	NA
NA	SFXN2	NA	NA	NA	NA	NA	NA	NA	NA	NA	NA	NA	NA	NA
NA	SFXN4	NA	NA	NA	NA	NA	NA	NA	NA	NA	NA	NA	NA	NA
NA	SFXN5	NA	NA	NA	NA	NA	NA	NA	NA	NA	NA	NA	NA	NA
NA	SGK494	NA	NA	NA	NA	NA	NA	NA	NA	NA	NA	NA	NA	NA
NA	SHCBP1	NA	NA	NA	NA	NA	NA	NA	NA	NA	NA	NA	NA	NA
NA	SHMT1	NA	NA	NA	NA	NA	NA	NA	NA	NA	NA	NA	NA	NA
NA	SHMT2	NA	NA	NA	NA	NA	NA	NA	NA	NA	NA	NA	NA	NA
NA	SHPRH	NA	NA	NA	NA	NA	NA	NA	NA	NA	NA	NA	NA	NA
NA	SHQ1	NA	NA	NA	NA	NA	NA	NA	NA	NA	NA	NA	NA	NA
NA	SIK2	NA	NA	NA	NA	NA	NA	NA	NA	NA	NA	NA	NA	NA
NA	SIN3A	NA	NA	NA	NA	NA	NA	NA	NA	NA	NA	NA	NA	NA
NA	SIPA1L2	NA	NA	NA	NA	NA	NA	NA	NA	NA	NA	NA	NA	NA
NA	SIRT1	NA	NA	NA	NA	NA	NA	NA	NA	NA	NA	NA	NA	NA
NA	SIVA1	NA	NA	NA	NA	NA	NA	NA	NA	NA	NA	NA	NA	NA
NA	SKA1	NA	NA	NA	NA	NA	NA	NA	NA	NA	NA	NA	NA	NA
NA	SKA2	NA	NA	NA	NA	NA	NA	NA	NA	NA	NA	NA	NA	NA
NA	SKA3	NA	NA	NA	NA	NA	NA	NA	NA	NA	NA	NA	NA	NA
NA	SKP2	NA	NA	NA	NA	NA	NA	NA	NA	NA	NA	NA	NA	NA
NA	SLBP	NA	NA	NA	NA	NA	NA	NA	NA	NA	NA	NA	NA	NA
NA	SLC12A7	NA	NA	NA	NA	NA	NA	NA	NA	NA	NA	NA	NA	NA
NA	SLC16A7	NA	NA	NA	NA	NA	NA	NA	NA	NA	NA	NA	NA	NA
NA	SLC17A9	NA	NA	NA	NA	NA	NA	NA	NA	NA	NA	NA	NA	NA
NA	SLC19A1	NA	NA	NA	NA	NA	NA	NA	NA	NA	NA	NA	NA	NA
NA	SLC25A10	NA	NA	NA	NA	NA	NA	NA	NA	NA	NA	NA	NA	NA
NA	SLC25A13	NA	NA	NA	NA	NA	NA	NA	NA	NA	NA	NA	NA	NA
NA	SLC25A15	NA	NA	NA	NA	NA	NA	NA	NA	NA	NA	NA	NA	NA
NA	SLC25A17	NA	NA	NA	NA	NA	NA	NA	NA	NA	NA	NA	NA	NA
NA	SLC25A19	NA	NA	NA	NA	NA	NA	NA	NA	NA	NA	NA	NA	NA
NA	SLC25A33	NA	NA	NA	NA	NA	NA	NA	NA	NA	NA	NA	NA	NA
NA	SLC25A35	NA	NA	NA	NA	NA	NA	NA	NA	NA	NA	NA	NA	NA
NA	SLC25A40	NA	NA	NA	NA	NA	NA	NA	NA	NA	NA	NA	NA	NA
NA	SLC25A5	NA	NA	NA	NA	NA	NA	NA	NA	NA	NA	NA	NA	NA
NA	SLC29A1	NA	NA	NA	NA	NA	NA	NA	NA	NA	NA	NA	NA	NA
NA	SLC2A4RG	NA	NA	NA	NA	NA	NA	NA	NA	NA	NA	NA	NA	NA
NA	SLC35D1	NA	NA	NA	NA	NA	NA	NA	NA	NA	NA	NA	NA	NA
NA	SLC36A4	NA	NA	NA	NA	NA	NA	NA	NA	NA	NA	NA	NA	NA
NA	SLC37A4	NA	NA	NA	NA	NA	NA	NA	NA	NA	NA	NA	NA	NA
NA	SLC38A4	NA	NA	NA	NA	NA	NA	NA	NA	NA	NA	NA	NA	NA
NA	SLC44A1	NA	NA	NA	NA	NA	NA	NA	NA	NA	NA	NA	NA	NA
NA	SLC4A7	NA	NA	NA	NA	NA	NA	NA	NA	NA	NA	NA	NA	NA
NA	SLC4A8	NA	NA	NA	NA	NA	NA	NA	NA	NA	NA	NA	NA	NA
NA	SLC5A6	NA	NA	NA	NA	NA	NA	NA	NA	NA	NA	NA	NA	NA
NA	SLC7A1	NA	NA	NA	NA	NA	NA	NA	NA	NA	NA	NA	NA	NA
NA	SLC7A11	NA	NA	NA	NA	NA	NA	NA	NA	NA	NA	NA	NA	NA
NA	SLC7A14	NA	NA	NA	NA	NA	NA	NA	NA	NA	NA	NA	NA	NA
NA	SLC7A2	NA	NA	NA	NA	NA	NA	NA	NA	NA	NA	NA	NA	NA
NA	SLC7A6OS	NA	NA	NA	NA	NA	NA	NA	NA	NA	NA	NA	NA	NA
NA	SLC9A9	NA	NA	NA	NA	NA	NA	NA	NA	NA	NA	NA	NA	NA
NA	SLCO3A1	NA	NA	NA	NA	NA	NA	NA	NA	NA	NA	NA	NA	NA
NA	SLFN11	NA	NA	NA	NA	NA	NA	NA	NA	NA	NA	NA	NA	NA
NA	SLFN12L	NA	NA	NA	NA	NA	NA	NA	NA	NA	NA	NA	NA	NA
NA	SLFN13	NA	NA	NA	NA	NA	NA	NA	NA	NA	NA	NA	NA	NA
NA	SLIT2	NA	NA	NA	NA	NA	NA	NA	NA	NA	NA	NA	NA	NA
NA	SLX4	NA	NA	NA	NA	NA	NA	NA	NA	NA	NA	NA	NA	NA
NA	SMAD1	NA	NA	NA	NA	NA	NA	NA	NA	NA	NA	NA	NA	NA
NA	SMAD4	NA	NA	NA	NA	NA	NA	NA	NA	NA	NA	NA	NA	NA
NA	SMAD6	NA	NA	NA	NA	NA	NA	NA	NA	NA	NA	NA	NA	NA
NA	SMAD9	NA	NA	NA	NA	NA	NA	NA	NA	NA	NA	NA	NA	NA
NA	SMAP2	NA	NA	NA	NA	NA	NA	NA	NA	NA	NA	NA	NA	NA
NA	SMARCA2	NA	NA	NA	NA	NA	NA	NA	NA	NA	NA	NA	NA	NA
NA	SMARCA4	NA	NA	NA	NA	NA	NA	NA	NA	NA	NA	NA	NA	NA
NA	SMARCA5	NA	NA	NA	NA	NA	NA	NA	NA	NA	NA	NA	NA	NA
NA	SMARCAD1	NA	NA	NA	NA	NA	NA	NA	NA	NA	NA	NA	NA	NA
NA	SMARCB1	NA	NA	NA	NA	NA	NA	NA	NA	NA	NA	NA	NA	NA
NA	SMARCC1	NA	NA	NA	NA	NA	NA	NA	NA	NA	NA	NA	NA	NA
NA	SMARCC2	NA	NA	NA	NA	NA	NA	NA	NA	NA	NA	NA	NA	NA
NA	SMARCD1	NA	NA	NA	NA	NA	NA	NA	NA	NA	NA	NA	NA	NA
NA	SMARCE1	NA	NA	NA	NA	NA	NA	NA	NA	NA	NA	NA	NA	NA
NA	SMC1A	NA	NA	NA	NA	NA	NA	NA	NA	NA	NA	NA	NA	NA
NA	SMC2	NA	NA	NA	NA	NA	NA	NA	NA	NA	NA	NA	NA	NA
NA	SMC3	NA	NA	NA	NA	NA	NA	NA	NA	NA	NA	NA	NA	NA
NA	SMC4	NA	NA	NA	NA	NA	NA	NA	NA	NA	NA	NA	NA	NA
NA	SMCHD1	NA	NA	NA	NA	NA	NA	NA	NA	NA	NA	NA	NA	NA
NA	SMNDC1	NA	NA	NA	NA	NA	NA	NA	NA	NA	NA	NA	NA	NA
NA	SMO	NA	NA	NA	NA	NA	NA	NA	NA	NA	NA	NA	NA	NA
NA	SMPD2	NA	NA	NA	NA	NA	NA	NA	NA	NA	NA	NA	NA	NA
NA	SMPD4	NA	NA	NA	NA	NA	NA	NA	NA	NA	NA	NA	NA	NA
NA	SMS	NA	NA	NA	NA	NA	NA	NA	NA	NA	NA	NA	NA	NA
NA	SMU1	NA	NA	NA	NA	NA	NA	NA	NA	NA	NA	NA	NA	NA
NA	SMYD4	NA	NA	NA	NA	NA	NA	NA	NA	NA	NA	NA	NA	NA
NA	SMYD5	NA	NA	NA	NA	NA	NA	NA	NA	NA	NA	NA	NA	NA
NA	SNAI1	NA	NA	NA	NA	NA	NA	NA	NA	NA	NA	NA	NA	NA
NA	SNCAIP	NA	NA	NA	NA	NA	NA	NA	NA	NA	NA	NA	NA	NA
NA	SNORA16B	NA	NA	NA	NA	NA	NA	NA	NA	NA	NA	NA	NA	NA
NA	SNORA58	NA	NA	NA	NA	NA	NA	NA	NA	NA	NA	NA	NA	NA
NA	SNORA71C	NA	NA	NA	NA	NA	NA	NA	NA	NA	NA	NA	NA	NA
NA	SNORA74A	NA	NA	NA	NA	NA	NA	NA	NA	NA	NA	NA	NA	NA
NA	SNORD15A	NA	NA	NA	NA	NA	NA	NA	NA	NA	NA	NA	NA	NA
NA	SNRNP200	NA	NA	NA	NA	NA	NA	NA	NA	NA	NA	NA	NA	NA
NA	SNRNP40	NA	NA	NA	NA	NA	NA	NA	NA	NA	NA	NA	NA	NA
NA	SNRNP48	NA	NA	NA	NA	NA	NA	NA	NA	NA	NA	NA	NA	NA
NA	SNRPA	NA	NA	NA	NA	NA	NA	NA	NA	NA	NA	NA	NA	NA
NA	SNRPB2	NA	NA	NA	NA	NA	NA	NA	NA	NA	NA	NA	NA	NA
NA	SNRPC	NA	NA	NA	NA	NA	NA	NA	NA	NA	NA	NA	NA	NA
NA	SNRPD1	NA	NA	NA	NA	NA	NA	NA	NA	NA	NA	NA	NA	NA
NA	SNRPD3	NA	NA	NA	NA	NA	NA	NA	NA	NA	NA	NA	NA	NA
NA	SNRPE	NA	NA	NA	NA	NA	NA	NA	NA	NA	NA	NA	NA	NA
NA	SNRPF	NA	NA	NA	NA	NA	NA	NA	NA	NA	NA	NA	NA	NA
NA	SNRPG	NA	NA	NA	NA	NA	NA	NA	NA	NA	NA	NA	NA	NA
NA	SNW1	NA	NA	NA	NA	NA	NA	NA	NA	NA	NA	NA	NA	NA
NA	SNX5	NA	NA	NA	NA	NA	NA	NA	NA	NA	NA	NA	NA	NA
NA	SOCS1	NA	NA	NA	NA	NA	NA	NA	NA	NA	NA	NA	NA	NA
NA	SOCS2	NA	NA	NA	NA	NA	NA	NA	NA	NA	NA	NA	NA	NA
NA	SOCS3	NA	NA	NA	NA	NA	NA	NA	NA	NA	NA	NA	NA	NA
NA	SOCS6	NA	NA	NA	NA	NA	NA	NA	NA	NA	NA	NA	NA	NA
NA	SORD	NA	NA	NA	NA	NA	NA	NA	NA	NA	NA	NA	NA	NA
NA	SORL1	NA	NA	NA	NA	NA	NA	NA	NA	NA	NA	NA	NA	NA
NA	SOX11	NA	NA	NA	NA	NA	NA	NA	NA	NA	NA	NA	NA	NA
NA	SP1	NA	NA	NA	NA	NA	NA	NA	NA	NA	NA	NA	NA	NA
NA	SP2	NA	NA	NA	NA	NA	NA	NA	NA	NA	NA	NA	NA	NA
[truncated: 522 more rows]

## Sheet: GSE59861_12h_GSE55118
X1_sets_GSE55118_middle_vs_young	X1_sets_GSE55118_old_vs_young	X1_sets_GSE59861_12h_2Gy	X1_sets_GSE59861_12h_5cGy	X2_sets_GSE55118_middle_vs_young_GSE55118_old_vs_young	X2_sets_GSE55118_middle_vs_young_GSE59861_12h_2Gy	X2_sets_GSE55118_middle_vs_young_GSE59861_12h_5cGy	X2_sets_GSE55118_old_vs_young_GSE59861_12h_2Gy	X2_sets_GSE55118_old_vs_young_GSE59861_12h_5cGy	X2_sets_GSE59861_12h_2Gy_GSE59861_12h_5cGy	X3_sets_GSE55118_middle_vs_young_GSE55118_old_vs_young_GSE59861_12h_2Gy	X3_sets_GSE55118_middle_vs_young_GSE55118_old_vs_young_GSE59861_12h_5cGy	X3_sets_GSE55118_middle_vs_young_GSE59861_12h_2Gy_GSE59861_12h_5cGy	X3_sets_GSE55118_old_vs_young_GSE59861_12h_2Gy_GSE59861_12h_5cGy	X4_sets_GSE55118_middle_vs_young_GSE55118_old_vs_young_GSE59861_12h_2Gy_GSE59861_12h_5cGy
AACS	ABL2	ADAMTS1	ABCE1	AGER	CCDC22	WASF2	ADAMTS1	ADAMTS1	ADAMTS1	ZNFX1	NA	WASF2	ADAMTS1	NA
ABCD1	ACD	ADARB1	ACADSB	ARHGAP6	DMAP1	NA	OXTR	NA	AIDA	NA	NA	NA	NA	NA
ABHD4	ADAMTS1	ADNP2	ACBD3	BANP	RRBP1	NA	ZNFX1	NA	AMD1	NA	NA	NA	NA	NA
ABLIM1	AGER	ADRA1D	ADAMTS1	BCKDHA	WASF2	NA	NA	NA	ARHGAP26	NA	NA	NA	NA	NA
ACACA	AMOTL1	AIDA	AIDA	C11ORF86	ZNFX1	NA	NA	NA	C1ORF174	NA	NA	NA	NA	NA
ACAD10	ANKLE2	AKAP13	ALCAM	C7ORF61	NA	NA	NA	NA	C20ORF96	NA	NA	NA	NA	NA
ACBD4	ANKRD46	ALG2	AMD1	CDHR5	NA	NA	NA	NA	CAB39	NA	NA	NA	NA	NA
ACSF3	APLP1	AMD1	ANGPTL4	CYP2E1	NA	NA	NA	NA	CALD1	NA	NA	NA	NA	NA
ADAM19	ARHGAP23	ANKRD11	APBB2	EFHC2	NA	NA	NA	NA	CAP2	NA	NA	NA	NA	NA
ADAMTS5	ARHGAP6	ANKRD17	AR	FOXP3	NA	NA	NA	NA	CCDC91	NA	NA	NA	NA	NA
ADAR	B9D1	ANXA3	ARFGAP3	GRIPAP1	NA	NA	NA	NA	CCND1	NA	NA	NA	NA	NA
ADD1	BANP	AP3D1	ARHGAP26	GUCA1B	NA	NA	NA	NA	CD44	NA	NA	NA	NA	NA
ADHFE1	BCKDHA	AP3M2	ARL2BP	INPP4B	NA	NA	NA	NA	CDC6	NA	NA	NA	NA	NA
AEBP1	C11ORF86	ARGLU1	ARRB2	KCTD13	NA	NA	NA	NA	CDH11	NA	NA	NA	NA	NA
AGA	C22ORF24	ARHGAP26	ASPH	LDB2	NA	NA	NA	NA	CHST11	NA	NA	NA	NA	NA
AGER	C2CD4C	ARID5B	ATF6	LYPD4	NA	NA	NA	NA	CLDN1	NA	NA	NA	NA	NA
AHNAK2	C2ORF70	ARPC5L	ATP10D	MAMSTR	NA	NA	NA	NA	CYTH2	NA	NA	NA	NA	NA
AKAP12	C4BPB	ATAD2	ATP2B4	MPPED1	NA	NA	NA	NA	DCBLD2	NA	NA	NA	NA	NA
ALG1L	C7ORF61	ATF7IP	ATP6V1A	MUC7	NA	NA	NA	NA	DKC1	NA	NA	NA	NA	NA
ALOX5AP	CABP4	ATXN7L3B	ATRX	NPLOC4	NA	NA	NA	NA	DUSP2	NA	NA	NA	NA	NA
AMPD2	CALCA	BAZ1B	ATXN7L1	NR2E3	NA	NA	NA	NA	DYNC1H1	NA	NA	NA	NA	NA
ANAPC13	CCDC27	BDNF	B4GALT4	OR4K14	NA	NA	NA	NA	EGR1	NA	NA	NA	NA	NA
ANKRD13B	CDA	BEND3	BCOR	OR56A1	NA	NA	NA	NA	EIF2AK3	NA	NA	NA	NA	NA
AP2A2	CDHR5	BICC1	BIRC3	OR5L1	NA	NA	NA	NA	EIF4G1	NA	NA	NA	NA	NA
AP4M1	CENPO	BICD2	BTN3A1	OR6Q1	NA	NA	NA	NA	EPRS	NA	NA	NA	NA	NA
APLNR	CHGB	BMPR2	C1ORF174	PDGFB	NA	NA	NA	NA	EREG	NA	NA	NA	NA	NA
APOBEC3C	COX15	BRD2	C20ORF96	POLR2F	NA	NA	NA	NA	FAF2	NA	NA	NA	NA	NA
APOBEC3F	CPLX2	BRD4	CAB39	PRKAR1B	NA	NA	NA	NA	FGF5	NA	NA	NA	NA	NA
AQP3	CSNK1G2	C1ORF174	CALD1	SLFNL1	NA	NA	NA	NA	FOS	NA	NA	NA	NA	NA
ARAP1	CYP2E1	C1ORF21	CAP2	TBC1D10C	NA	NA	NA	NA	FRMD3	NA	NA	NA	NA	NA
ARHGAP1	DET1	C20ORF96	CAPZA1	TEX13A	NA	NA	NA	NA	G3BP1	NA	NA	NA	NA	NA
ARHGAP28	DHDH	C3ORF52	CCDC91	TMC6	NA	NA	NA	NA	GABPB1	NA	NA	NA	NA	NA
ARHGAP6	DOT1L	C6ORF106	CCND1	TP53INP2	NA	NA	NA	NA	GAPVD1	NA	NA	NA	NA	NA
ARHGEF4	DRD5	C9ORF3	CCT2	TRPM6	NA	NA	NA	NA	GART	NA	NA	NA	NA	NA
ARMCX2	EFHC2	CAB39	CD44	TRPM8	NA	NA	NA	NA	GIGYF2	NA	NA	NA	NA	NA
ARRB1	EFNA5	CACNB4	CDC16	VASH2	NA	NA	NA	NA	GREM2	NA	NA	NA	NA	NA
ARSE	EPB42	CALD1	CDC6	VSX1	NA	NA	NA	NA	GTPBP4	NA	NA	NA	NA	NA
ASTN2	FARP1	CAP2	CDC73	ZBTB48	NA	NA	NA	NA	HSPA2	NA	NA	NA	NA	NA
ATG2A	FAT4	CAST	CDCA2	ZFAT	NA	NA	NA	NA	HSPA5	NA	NA	NA	NA	NA
ATP6AP1L	FGA	CBL	CDH11	ZMAT4	NA	NA	NA	NA	HSPA8	NA	NA	NA	NA	NA
BAIAP2	FGF6	CCDC12	CHST11	ZNF711	NA	NA	NA	NA	HSPH1	NA	NA	NA	NA	NA
BANP	FGFR1	CCDC22	CITED2	ZNFX1	NA	NA	NA	NA	ID4	NA	NA	NA	NA	NA
BBS4	FLCN	CCDC80	CLDN1	NA	NA	NA	NA	NA	JUN	NA	NA	NA	NA	NA
BBS5	FLG	CCDC91	COQ10B	NA	NA	NA	NA	NA	KBTBD2	NA	NA	NA	NA	NA
BBS9	FLNA	CCND1	CYTH2	NA	NA	NA	NA	NA	KHDRBS3	NA	NA	NA	NA	NA
BCAS3	FOXP3	CCNE2	DCBLD2	NA	NA	NA	NA	NA	LRRFIP1	NA	NA	NA	NA	NA
BCKDHA	FUT3	CD44	DKC1	NA	NA	NA	NA	NA	MCM6	NA	NA	NA	NA	NA
BCO2	FXYD3	CD48	DNAJB9	NA	NA	NA	NA	NA	MPP5	NA	NA	NA	NA	NA
BNC2	GABRA5	CDC25A	DUSP1	NA	NA	NA	NA	NA	MSH6	NA	NA	NA	NA	NA
BPNT1	GABRQ	CDC45	DUSP2	NA	NA	NA	NA	NA	NEDD9	NA	NA	NA	NA	NA
BRF2	GH1	CDC6	DYNC1H1	NA	NA	NA	NA	NA	NES	NA	NA	NA	NA	NA
BSX	GMPPA	CDCA7	EGR1	NA	NA	NA	NA	NA	NR1D2	NA	NA	NA	NA	NA
BTBD2	GRIP2	CDCA7L	EIF2AK3	NA	NA	NA	NA	NA	NR3C1	NA	NA	NA	NA	NA
C11ORF86	GRIPAP1	CDH11	EIF4G1	NA	NA	NA	NA	NA	NTM	NA	NA	NA	NA	NA
C1QTNF6	GUCA1B	CDK5R1	ELF1	NA	NA	NA	NA	NA	PDE4DIP	NA	NA	NA	NA	NA
C7ORF61	IL2RG	CDT1	ELOVL5	NA	NA	NA	NA	NA	PDP1	NA	NA	NA	NA	NA
C8ORF31	INO80E	CHAF1A	EPHB1	NA	NA	NA	NA	NA	PRRC1	NA	NA	NA	NA	NA
CANT1	INPP4B	CHD4	EPRS	NA	NA	NA	NA	NA	RGS16	NA	NA	NA	NA	NA
CC2D1A	INSC	CHST11	EPS8	NA	NA	NA	NA	NA	RGS4	NA	NA	NA	NA	NA
CC2D2A	ITGA3	CLDN1	EREG	NA	NA	NA	NA	NA	RHOBTB1	NA	NA	NA	NA	NA
CCDC22	ITGA5	CLIC4	ERGIC2	NA	NA	NA	NA	NA	SEH1L	NA	NA	NA	NA	NA
CCDC65	IYD	CLSPN	ETNK1	NA	NA	NA	NA	NA	SFXN1	NA	NA	NA	NA	NA
CCDC8	KCNJ9	CLSTN1	ETV3	NA	NA	NA	NA	NA	SH3KBP1	NA	NA	NA	NA	NA
CD276	KCTD13	CMTM4	FAF2	NA	NA	NA	NA	NA	SH3RF1	NA	NA	NA	NA	NA
CD52	KLHDC10	CNST	FAM98A	NA	NA	NA	NA	NA	SLAIN2	NA	NA	NA	NA	NA
CDH18	LDB2	CPNE3	FGD4	NA	NA	NA	NA	NA	SLC31A1	NA	NA	NA	NA	NA
CDHR5	LIPH	CYTH2	FGF5	NA	NA	NA	NA	NA	SMC1A	NA	NA	NA	NA	NA
CDKN2B	LMF1	DCBLD2	FOS	NA	NA	NA	NA	NA	SON	NA	NA	NA	NA	NA
CEMP1	LMOD2	DEFB116	FOXO1	NA	NA	NA	NA	NA	SORD	NA	NA	NA	NA	NA
CHD3	LYPD4	DEFB126	FRMD3	NA	NA	NA	NA	NA	SRSF10	NA	NA	NA	NA	NA
CLCN2	MAMSTR	DEK	FRYL	NA	NA	NA	NA	NA	SRSF5	NA	NA	NA	NA	NA
CLSTN3	MAP2	DKC1	G3BP1	NA	NA	NA	NA	NA	SYNCRIP	NA	NA	NA	NA	NA
CMA1	MASP1	DLGAP4	GABPB1	NA	NA	NA	NA	NA	TAF13	NA	NA	NA	NA	NA
COG4	MCF2L	DLX1	GAPVD1	NA	NA	NA	NA	NA	TES	NA	NA	NA	NA	NA
CREB3L3	MIER2	DMAP1	GART	NA	NA	NA	NA	NA	TIMP3	NA	NA	NA	NA	NA
CSAD	MMP19	DNAH11	GIGYF2	NA	NA	NA	NA	NA	TOP1	NA	NA	NA	NA	NA
CUL7	MPPED1	DNAJC1	GNL3	NA	NA	NA	NA	NA	TRA2A	NA	NA	NA	NA	NA
CYB5D2	MRAP2	DNMT1	GOLPH3	NA	NA	NA	NA	NA	TRA2B	NA	NA	NA	NA	NA
CYB5R3	MUC7	DTL	GREM2	NA	NA	NA	NA	NA	TTC9	NA	NA	NA	NA	NA
CYHR1	NACAD	DTNA	GTPBP4	NA	NA	NA	NA	NA	TXNRD1	NA	NA	NA	NA	NA
CYP2E1	NADK	DUSP2	HSPA2	NA	NA	NA	NA	NA	USO1	NA	NA	NA	NA	NA
DCLK1	NCR2	DYNC1H1	HSPA5	NA	NA	NA	NA	NA	WASF2	NA	NA	NA	NA	NA
DDX24	NEFH	EFNB2	HSPA8	NA	NA	NA	NA	NA	WNK1	NA	NA	NA	NA	NA
DISP1	NEK4	EFR3A	HSPD1	NA	NA	NA	NA	NA	WNK4	NA	NA	NA	NA	NA
DMAP1	NPLOC4	EGR1	HSPH1	NA	NA	NA	NA	NA	XRN2	NA	NA	NA	NA	NA
DNAJC4	NR2E3	EIF2AK1	ID4	NA	NA	NA	NA	NA	YRDC	NA	NA	NA	NA	NA
DNASE1	OGFOD1	EIF2AK3	IL1RL2	NA	NA	NA	NA	NA	ZFR	NA	NA	NA	NA	NA
EEF2	OR4K14	EIF4G1	JUN	NA	NA	NA	NA	NA	ZNF398	NA	NA	NA	NA	NA
EFCAB7	OR51S1	ELK4	KBTBD2	NA	NA	NA	NA	NA	ZNF431	NA	NA	NA	NA	NA
EFHC2	OR56A1	ENAH	KHDRBS3	NA	NA	NA	NA	NA	ZSWIM6	NA	NA	NA	NA	NA
EHMT2	OR5L1	EPRS	LRRFIP1	NA	NA	NA	NA	NA	NA	NA	NA	NA	NA	NA
EIF3F	OR6Q1	EREG	MAP3K2	NA	NA	NA	NA	NA	NA	NA	NA	NA	NA	NA
EPB41L2	OXTR	ETV5	MCM6	NA	NA	NA	NA	NA	NA	NA	NA	NA	NA	NA
EPHB3	PANK4	EXO1	METTL3	NA	NA	NA	NA	NA	NA	NA	NA	NA	NA	NA
EPSTI1	PDGFB	FABP6	MIS12	NA	NA	NA	NA	NA	NA	NA	NA	NA	NA	NA
EXOC3	PEX26	FAF2	MPP5	NA	NA	NA	NA	NA	NA	NA	NA	NA	NA	NA
FAM198B	PGLYRP1	FAM120A	MSH6	NA	NA	NA	NA	NA	NA	NA	NA	NA	NA	NA
FAM3A	PLAT	FBXO11	NARS	NA	NA	NA	NA	NA	NA	NA	NA	NA	NA	NA
FAM71B	PLCXD1	FCRL1	NDEL1	NA	NA	NA	NA	NA	NA	NA	NA	NA	NA	NA
FBXO15	PLK1	FEN1	NEDD9	NA	NA	NA	NA	NA	NA	NA	NA	NA	NA	NA
FBXO6	PLXNA3	FGF1	NES	NA	NA	NA	NA	NA	NA	NA	NA	NA	NA	NA
FBXW9	POLR2F	FGF5	NOLC1	NA	NA	NA	NA	NA	NA	NA	NA	NA	NA	NA
FCGR2B	PRKAR1B	FKBP15	NR1D2	NA	NA	NA	NA	NA	NA	NA	NA	NA	NA	NA
FES	PRMT5	FLT1	NR3C1	NA	NA	NA	NA	NA	NA	NA	NA	NA	NA	NA
FGF16	PRSS3	FOS	NRG1	NA	NA	NA	NA	NA	NA	NA	NA	NA	NA	NA
FGGY	RALGAPB	FOXC1	NTM	NA	NA	NA	NA	NA	NA	NA	NA	NA	NA	NA
FLT3LG	RFX1	FOXO3	PAPOLA	NA	NA	NA	NA	NA	NA	NA	NA	NA	NA	NA
FNDC5	SCN5A	FRMD3	PAPSS1	NA	NA	NA	NA	NA	NA	NA	NA	NA	NA	NA
FOXK2	SEMA7A	FZD1	PDE4DIP	NA	NA	NA	NA	NA	NA	NA	NA	NA	NA	NA
FOXP3	SF3B3	G3BP1	PDP1	NA	NA	NA	NA	NA	NA	NA	NA	NA	NA	NA
G6PD	SH2D7	GAB4	PHACTR2	NA	NA	NA	NA	NA	NA	NA	NA	NA	NA	NA
GAL3ST4	SLC13A4	GABPB1	PICALM	NA	NA	NA	NA	NA	NA	NA	NA	NA	NA	NA
GALM	SLFNL1	GAPVD1	PIK3R1	NA	NA	NA	NA	NA	NA	NA	NA	NA	NA	NA
GALP	SMPD1	GART	PITPNB	NA	NA	NA	NA	NA	NA	NA	NA	NA	NA	NA
GLG1	SMTN	GCLM	POLR2C	NA	NA	NA	NA	NA	NA	NA	NA	NA	NA	NA
GPR108	SP6	GCNT1	PPIF	NA	NA	NA	NA	NA	NA	NA	NA	NA	NA	NA
GPR137	SPEF1	GIGYF2	PRRC1	NA	NA	NA	NA	NA	NA	NA	NA	NA	NA	NA
GRAMD1A	SPTAN1	GINS1	RAB27A	NA	NA	NA	NA	NA	NA	NA	NA	NA	NA	NA
GRIPAP1	STX1B	GINS3	RGS16	NA	NA	NA	NA	NA	NA	NA	NA	NA	NA	NA
GSTA4	SUPT6H	GJC1	RGS4	NA	NA	NA	NA	NA	NA	NA	NA	NA	NA	NA
GTF2H5	TAF6	GLI2	RHOBTB1	NA	NA	NA	NA	NA	NA	NA	NA	NA	NA	NA
GTPBP8	TBC1D10C	GLIS3	RIPK1	NA	NA	NA	NA	NA	NA	NA	NA	NA	NA	NA
GUCA1B	TEX13A	GNB1	RLIM	NA	NA	NA	NA	NA	NA	NA	NA	NA	NA	NA
HAAO	TMC6	GNLY	RPL14	NA	NA	NA	NA	NA	NA	NA	NA	NA	NA	NA
HDAC10	TNFRSF10D	GPATCH8	SEC23A	NA	NA	NA	NA	NA	NA	NA	NA	NA	NA	NA
HDAC11	TP53INP2	GREM2	SEH1L	NA	NA	NA	NA	NA	NA	NA	NA	NA	NA	NA
HDLBP	TPD52L2	GTPBP4	SFXN1	NA	NA	NA	NA	NA	NA	NA	NA	NA	NA	NA
HES1	TRIM46	HSPA2	SH2D2A	NA	NA	NA	NA	NA	NA	NA	NA	NA	NA	NA
HFE	TRPM6	HSPA5	SH3KBP1	NA	NA	NA	NA	NA	NA	NA	NA	NA	NA	NA
HGF	TRPM8	HSPA8	SH3RF1	NA	NA	NA	NA	NA	NA	NA	NA	NA	NA	NA
HHLA3	USH1C	HSPH1	SLAIN2	NA	NA	NA	NA	NA	NA	NA	NA	NA	NA	NA
HOXD9	VASH2	ID4	SLC16A1	NA	NA	NA	NA	NA	NA	NA	NA	NA	NA	NA
HPD	VSX1	INHBB	SLC25A32	NA	NA	NA	NA	NA	NA	NA	NA	NA	NA	NA
HPS1	WARS2	IQGAP1	SLC30A7	NA	NA	NA	NA	NA	NA	NA	NA	NA	NA	NA
HR	WFDC5	IRX5	SLC31A1	NA	NA	NA	NA	NA	NA	NA	NA	NA	NA	NA
HS1BP3	WNT2B	JUN	SLC39A9	NA	NA	NA	NA	NA	NA	NA	NA	NA	NA	NA
HSPA1L	ZBTB48	KBTBD2	SLC7A2	NA	NA	NA	NA	NA	NA	NA	NA	NA	NA	NA
HSPB1	ZC3H11A	KCTD20	SMC1A	NA	NA	NA	NA	NA	NA	NA	NA	NA	NA	NA
HTRA3	ZFAT	KHDRBS3	SNAP23	NA	NA	NA	NA	NA	NA	NA	NA	NA	NA	NA
ID2	ZMAT4	KLF10	SON	NA	NA	NA	NA	NA	NA	NA	NA	NA	NA	NA
IFI35	ZNF133	KLF11	SORD	NA	NA	NA	NA	NA	NA	NA	NA	NA	NA	NA
IFT122	ZNF285	KPNA1	SPRY3	NA	NA	NA	NA	NA	NA	NA	NA	NA	NA	NA
IFT46	ZNF385D	LANCL1	SPTY2D1	NA	NA	NA	NA	NA	NA	NA	NA	NA	NA	NA
IGDCC4	ZNF575	LATS2	SRSF10	NA	NA	NA	NA	NA	NA	NA	NA	NA	NA	NA
IGFBP6	ZNF711	LDLR	SRSF5	NA	NA	NA	NA	NA	NA	NA	NA	NA	NA	NA
IGSF6	ZNFX1	LPAR4	STARD4	NA	NA	NA	NA	NA	NA	NA	NA	NA	NA	NA
IL2RB	NA	LRRC8C	STARD7	NA	NA	NA	NA	NA	NA	NA	NA	NA	NA	NA
INPP4B	NA	LRRFIP1	STIP1	NA	NA	NA	NA	NA	NA	NA	NA	NA	NA	NA
IPP	NA	LSG1	STXBP5	NA	NA	NA	NA	NA	NA	NA	NA	NA	NA	NA
ISLR	NA	LTBP1	SYNCRIP	NA	NA	NA	NA	NA	NA	NA	NA	NA	NA	NA
ITGA11	NA	LYN	TAF13	NA	NA	NA	NA	NA	NA	NA	NA	NA	NA	NA
JAG1	NA	MAGI2	TAF3	NA	NA	NA	NA	NA	NA	NA	NA	NA	NA	NA
KCND1	NA	MAP1B	TANK	NA	NA	NA	NA	NA	NA	NA	NA	NA	NA	NA
KCTD13	NA	MCM10	TBRG1	NA	NA	NA	NA	NA	NA	NA	NA	NA	NA	NA
KDM5B	NA	MCM3	TCEA1	NA	NA	NA	NA	NA	NA	NA	NA	NA	NA	NA
KLHL22	NA	MCM4	TDG	NA	NA	NA	NA	NA	NA	NA	NA	NA	NA	NA
KSR1	NA	MCM6	TES	NA	NA	NA	NA	NA	NA	NA	NA	NA	NA	NA
LDB1	NA	METTL2B	THUMPD1	NA	NA	NA	NA	NA	NA	NA	NA	NA	NA	NA
LDB2	NA	MIER1	TIA1	NA	NA	NA	NA	NA	NA	NA	NA	NA	NA	NA
LEPROTL1	NA	MPP5	TIMP3	NA	NA	NA	NA	NA	NA	NA	NA	NA	NA	NA
LILRB4	NA	MSH6	TMEM39A	NA	NA	NA	NA	NA	NA	NA	NA	NA	NA	NA
LRRC17	NA	MYH11	TNFSF18	NA	NA	NA	NA	NA	NA	NA	NA	NA	NA	NA
LRRC47	NA	NCOA1	TOP1	NA	NA	NA	NA	NA	NA	NA	NA	NA	NA	NA
LRSAM1	NA	NCOA3	TRA2A	NA	NA	NA	NA	NA	NA	NA	NA	NA	NA	NA
LTBP4	NA	NEDD9	TRA2B	NA	NA	NA	NA	NA	NA	NA	NA	NA	NA	NA
LYPD4	NA	NES	TTC9	NA	NA	NA	NA	NA	NA	NA	NA	NA	NA	NA
MAMSTR	NA	NFIC	TXNRD1	NA	NA	NA	NA	NA	NA	NA	NA	NA	NA	NA
MAN1B1	NA	NHLRC2	UBXN4	NA	NA	NA	NA	NA	NA	NA	NA	NA	NA	NA
MAN1C1	NA	NLN	UGDH	NA	NA	NA	NA	NA	NA	NA	NA	NA	NA	NA
MAP1LC3C	NA	NMNAT2	USO1	NA	NA	NA	NA	NA	NA	NA	NA	NA	NA	NA
MAP2K5	NA	NOL10	VCPIP1	NA	NA	NA	NA	NA	NA	NA	NA	NA	NA	NA
MAP4	NA	NR1D2	VEPH1	NA	NA	NA	NA	NA	NA	NA	NA	NA	NA	NA
MAPK11	NA	NR3C1	VPS35	NA	NA	NA	NA	NA	NA	NA	NA	NA	NA	NA
MAPK3	NA	NRG3	WASF2	NA	NA	NA	NA	NA	NA	NA	NA	NA	NA	NA
MAPK8IP1	NA	NTM	WDR4	NA	NA	NA	NA	NA	NA	NA	NA	NA	NA	NA
MARK4	NA	OR2L3	WNK1	NA	NA	NA	NA	NA	NA	NA	NA	NA	NA	NA
MAST3	NA	ORC1	WNK4	NA	NA	NA	NA	NA	NA	NA	NA	NA	NA	NA
MAST4	NA	OXTR	WSB1	NA	NA	NA	NA	NA	NA	NA	NA	NA	NA	NA
MBNL2	NA	PARD3	XRN2	NA	NA	NA	NA	NA	NA	NA	NA	NA	NA	NA
MBP	NA	PARP1	YRDC	NA	NA	NA	NA	NA	NA	NA	NA	NA	NA	NA
MCC	NA	PDCD11	ZFAND5	NA	NA	NA	NA	NA	NA	NA	NA	NA	NA	NA
MEGF8	NA	PDE4D	ZFR	NA	NA	NA	NA	NA	NA	NA	NA	NA	NA	NA
MEN1	NA	PDE4DIP	ZNF175	NA	NA	NA	NA	NA	NA	NA	NA	NA	NA	NA
MIB2	NA	PDP1	ZNF398	NA	NA	NA	NA	NA	NA	NA	NA	NA	NA	NA
MLST8	NA	PER2	ZNF431	NA	NA	NA	NA	NA	NA	NA	NA	NA	NA	NA
MPPED1	NA	PHEX	ZSWIM6	NA	NA	NA	NA	NA	NA	NA	NA	NA	NA	NA
MPPED2	NA	PLEKHA1	NA	NA	NA	NA	NA	NA	NA	NA	NA	NA	NA	NA
MR1	NA	PPRC1	NA	NA	NA	NA	NA	NA	NA	NA	NA	NA	NA	NA
MTHFR	NA	PRRC1	NA	NA	NA	NA	NA	NA	NA	NA	NA	NA	NA	NA
MTMR1	NA	PRRX1	NA	NA	NA	NA	NA	NA	NA	NA	NA	NA	NA	NA
MTR	NA	PSMB11	NA	NA	NA	NA	NA	NA	NA	NA	NA	NA	NA	NA
MUC7	NA	PSTK	NA	NA	NA	NA	NA	NA	NA	NA	NA	NA	NA	NA
MYCBP2	NA	RAD51	NA	NA	NA	NA	NA	NA	NA	NA	NA	NA	NA	NA
MYOCD	NA	RAPGEF2	NA	NA	NA	NA	NA	NA	NA	NA	NA	NA	NA	NA
MYOZ3	NA	RAPH1	NA	NA	NA	NA	NA	NA	NA	NA	NA	NA	NA	NA
NBAS	NA	RASD1	NA	NA	NA	NA	NA	NA	NA	NA	NA	NA	NA	NA
NFE2	NA	RBFOX3	NA	NA	NA	NA	NA	NA	NA	NA	NA	NA	NA	NA
NISCH	NA	RBM22	NA	NA	NA	NA	NA	NA	NA	NA	NA	NA	NA	NA
NLE1	NA	RBM42	NA	NA	NA	NA	NA	NA	NA	NA	NA	NA	NA	NA
NLGN4Y	NA	RFC4	NA	NA	NA	NA	NA	NA	NA	NA	NA	NA	NA	NA
NOTCH2	NA	RGS12	NA	NA	NA	NA	NA	NA	NA	NA	NA	NA	NA	NA
NPLOC4	NA	RGS16	NA	NA	NA	NA	NA	NA	NA	NA	NA	NA	NA	NA
NR2E3	NA	RGS4	NA	NA	NA	NA	NA	NA	NA	NA	NA	NA	NA	NA
NSMCE1	NA	RHBDD1	NA	NA	NA	NA	NA	NA	NA	NA	NA	NA	NA	NA
NTNG1	NA	RHOBTB1	NA	NA	NA	NA	NA	NA	NA	NA	NA	NA	NA	NA
NUDT13	NA	ROBO3	NA	NA	NA	NA	NA	NA	NA	NA	NA	NA	NA	NA
OAF	NA	RRBP1	NA	NA	NA	NA	NA	NA	NA	NA	NA	NA	NA	NA
ODF3L1	NA	RRM2	NA	NA	NA	NA	NA	NA	NA	NA	NA	NA	NA	NA
OGFOD2	NA	S1PR1	NA	NA	NA	NA	NA	NA	NA	NA	NA	NA	NA	NA
OR10A3	NA	SAFB2	NA	NA	NA	NA	NA	NA	NA	NA	NA	NA	NA	NA
OR4K14	NA	SCAMP1	NA	NA	NA	NA	NA	NA	NA	NA	NA	NA	NA	NA
OR56A1	NA	SCFD2	NA	NA	NA	NA	NA	NA	NA	NA	NA	NA	NA	NA
OR5L1	NA	SEC23B	NA	NA	NA	NA	NA	NA	NA	NA	NA	NA	NA	NA
OR6Q1	NA	SECISBP2	NA	NA	NA	NA	NA	NA	NA	NA	NA	NA	NA	NA
PANK3	NA	SEH1L	NA	NA	NA	NA	NA	NA	NA	NA	NA	NA	NA	NA
PARP10	NA	SEL1L3	NA	NA	NA	NA	NA	NA	NA	NA	NA	NA	NA	NA
PARP16	NA	SEMA6A	NA	NA	NA	NA	NA	NA	NA	NA	NA	NA	NA	NA
PATZ1	NA	SERPINE1	NA	NA	NA	NA	NA	NA	NA	NA	NA	NA	NA	NA
PCSK5	NA	SFMBT1	NA	NA	NA	NA	NA	NA	NA	NA	NA	NA	NA	NA
PDE5A	NA	SFRP1	NA	NA	NA	NA	NA	NA	NA	NA	NA	NA	NA	NA
PDGFB	NA	SFXN1	NA	NA	NA	NA	NA	NA	NA	NA	NA	NA	NA	NA
PDK2	NA	SGMS2	NA	NA	NA	NA	NA	NA	NA	NA	NA	NA	NA	NA
PEF1	NA	SH3KBP1	NA	NA	NA	NA	NA	NA	NA	NA	NA	NA	NA	NA
PIP5KL1	NA	SH3RF1	NA	NA	NA	NA	NA	NA	NA	NA	NA	NA	NA	NA
PLA2G6	NA	SLAIN2	NA	NA	NA	NA	NA	NA	NA	NA	NA	NA	NA	NA
PLEKHF1	NA	SLC31A1	NA	NA	NA	NA	NA	NA	NA	NA	NA	NA	NA	NA
PLEKHG4	NA	SLFN11	NA	NA	NA	NA	NA	NA	NA	NA	NA	NA	NA	NA
POLR2F	NA	SMARCA4	NA	NA	NA	NA	NA	NA	NA	NA	NA	NA	NA	NA
POLRMT	NA	SMARCC1	NA	NA	NA	NA	NA	NA	NA	NA	NA	NA	NA	NA
PPM1M	NA	SMC1A	NA	NA	NA	NA	NA	NA	NA	NA	NA	NA	NA	NA
PRDM16	NA	SON	NA	NA	NA	NA	NA	NA	NA	NA	NA	NA	NA	NA
PRDX2	NA	SORD	NA	NA	NA	NA	NA	NA	NA	NA	NA	NA	NA	NA
PRICKLE2	NA	SPATA8	NA	NA	NA	NA	NA	NA	NA	NA	NA	NA	NA	NA
PRKAG1	NA	SPEN	NA	NA	NA	NA	NA	NA	NA	NA	NA	NA	NA	NA
PRKAR1B	NA	SRRM2	NA	NA	NA	NA	NA	NA	NA	NA	NA	NA	NA	NA
PRMT7	NA	SRSF10	NA	NA	NA	NA	NA	NA	NA	NA	NA	NA	NA	NA
PRSS54	NA	SRSF5	NA	NA	NA	NA	NA	NA	NA	NA	NA	NA	NA	NA
PTCD3	NA	SSRP1	NA	NA	NA	NA	NA	NA	NA	NA	NA	NA	NA	NA
PTCH1	NA	SSTR1	NA	NA	NA	NA	NA	NA	NA	NA	NA	NA	NA	NA
PTP4A3	NA	ST3GAL1	NA	NA	NA	NA	NA	NA	NA	NA	NA	NA	NA	NA
PYCR2	NA	STIM2	NA	NA	NA	NA	NA	NA	NA	NA	NA	NA	NA	NA
RAI1	NA	STMN4	NA	NA	NA	NA	NA	NA	NA	NA	NA	NA	NA	NA
RBCK1	NA	SYNCRIP	NA	NA	NA	NA	NA	NA	NA	NA	NA	NA	NA	NA
RECQL5	NA	SYNPO	NA	NA	NA	NA	NA	NA	NA	NA	NA	NA	NA	NA
RGL2	NA	TAF13	NA	NA	NA	NA	NA	NA	NA	NA	NA	NA	NA	NA
RNASEL	NA	TAF1B	NA	NA	NA	NA	NA	NA	NA	NA	NA	NA	NA	NA
RNF123	NA	TBL1X	NA	NA	NA	NA	NA	NA	NA	NA	NA	NA	NA	NA
RNF125	NA	TCF19	NA	NA	NA	NA	NA	NA	NA	NA	NA	NA	NA	NA
RNF40	NA	TES	NA	NA	NA	NA	NA	NA	NA	NA	NA	NA	NA	NA
RPL22L1	NA	TFB2M	NA	NA	NA	NA	NA	NA	NA	NA	NA	NA	NA	NA
RRBP1	NA	THSD4	NA	NA	NA	NA	NA	NA	NA	NA	NA	NA	NA	NA
S100A14	NA	TIMP3	NA	NA	NA	NA	NA	NA	NA	NA	NA	NA	NA	NA
SAT1	NA	TIPIN	NA	NA	NA	NA	NA	NA	NA	NA	NA	NA	NA	NA
SCARA3	NA	TLN1	NA	NA	NA	NA	NA	NA	NA	NA	NA	NA	NA	NA
SCNN1A	NA	TMEM209	NA	NA	NA	NA	NA	NA	NA	NA	NA	NA	NA	NA
SCNN1D	NA	TMEM43	NA	NA	NA	NA	NA	NA	NA	NA	NA	NA	NA	NA
SDK1	NA	TNFAIP3	NA	NA	NA	NA	NA	NA	NA	NA	NA	NA	NA	NA
SELENBP1	NA	TOP1	NA	NA	NA	NA	NA	NA	NA	NA	NA	NA	NA	NA
SEMA3B	NA	TPM4	NA	NA	NA	NA	NA	NA	NA	NA	NA	NA	NA	NA
SEMA3G	NA	TRA2A	NA	NA	NA	NA	NA	NA	NA	NA	NA	NA	NA	NA
SEMA4B	NA	TRA2B	NA	NA	NA	NA	NA	NA	NA	NA	NA	NA	NA	NA
SH3BP5	NA	TRAF6	NA	NA	NA	NA	NA	NA	NA	NA	NA	NA	NA	NA
SIAE	NA	TRMU	NA	NA	NA	NA	NA	NA	NA	NA	NA	NA	NA	NA
SIRT2	NA	TTC9	NA	NA	NA	NA	NA	NA	NA	NA	NA	NA	NA	NA
SIRT3	NA	TWIST1	NA	NA	NA	NA	NA	NA	NA	NA	NA	NA	NA	NA
SIRT5	NA	TXNRD1	NA	NA	NA	NA	NA	NA	NA	NA	NA	NA	NA	NA
SLC16A4	NA	UBTD2	NA	NA	NA	NA	NA	NA	NA	NA	NA	NA	NA	NA
SLC22A12	NA	UGCG	NA	NA	NA	NA	NA	NA	NA	NA	NA	NA	NA	NA
SLC35E4	NA	UHRF1	NA	NA	NA	NA	NA	NA	NA	NA	NA	NA	NA	NA
SLC45A1	NA	UNG	NA	NA	NA	NA	NA	NA	NA	NA	NA	NA	NA	NA
SLFNL1	NA	USO1	NA	NA	NA	NA	NA	NA	NA	NA	NA	NA	NA	NA
SMARCD3	NA	USP10	NA	NA	NA	NA	NA	NA	NA	NA	NA	NA	NA	NA
SMG6	NA	USP7	NA	NA	NA	NA	NA	NA	NA	NA	NA	NA	NA	NA
SNTG1	NA	UST	NA	NA	NA	NA	NA	NA	NA	NA	NA	NA	NA	NA
SNUPN	NA	VCL	NA	NA	NA	NA	NA	NA	NA	NA	NA	NA	NA	NA
SNX21	NA	WASF2	NA	NA	NA	NA	NA	NA	NA	NA	NA	NA	NA	NA
SPATA4	NA	WDR37	NA	NA	NA	NA	NA	NA	NA	NA	NA	NA	NA	NA
SPG7	NA	WDR76	NA	NA	NA	NA	NA	NA	NA	NA	NA	NA	NA	NA
SPNS1	NA	WNK1	NA	NA	NA	NA	NA	NA	NA	NA	NA	NA	NA	NA
TAF1	NA	WNK4	NA	NA	NA	NA	NA	NA	NA	NA	NA	NA	NA	NA
TBC1D10C	NA	WWC1	NA	NA	NA	NA	NA	NA	NA	NA	NA	NA	NA	NA
TBC1D17	NA	WWTR1	NA	NA	NA	NA	NA	NA	NA	NA	NA	NA	NA	NA
TBCD	NA	XRN2	NA	NA	NA	NA	NA	NA	NA	NA	NA	NA	NA	NA
TCF25	NA	XYLT1	NA	NA	NA	NA	NA	NA	NA	NA	NA	NA	NA	NA
TEX13A	NA	YRDC	NA	NA	NA	NA	NA	NA	NA	NA	NA	NA	NA	NA
THAP11	NA	ZFR	NA	NA	NA	NA	NA	NA	NA	NA	NA	NA	NA	NA
THAP8	NA	ZNF273	NA	NA	NA	NA	NA	NA	NA	NA	NA	NA	NA	NA
THRA	NA	ZNF274	NA	NA	NA	NA	NA	NA	NA	NA	NA	NA	NA	NA
TLE3	NA	ZNF275	NA	NA	NA	NA	NA	NA	NA	NA	NA	NA	NA	NA
TLR3	NA	ZNF367	NA	NA	NA	NA	NA	NA	NA	NA	NA	NA	NA	NA
TMC6	NA	ZNF398	NA	NA	NA	NA	NA	NA	NA	NA	NA	NA	NA	NA
TMEM115	NA	ZNF431	NA	NA	NA	NA	NA	NA	NA	NA	NA	NA	NA	NA
TMEM45A	NA	ZNF470	NA	NA	NA	NA	NA	NA	NA	NA	NA	NA	NA	NA
TP53I3	NA	ZNF480	NA	NA	NA	NA	NA	NA	NA	NA	NA	NA	NA	NA
TP53INP2	NA	ZNFX1	NA	NA	NA	NA	NA	NA	NA	NA	NA	NA	NA	NA
TPRG1L	NA	ZSWIM6	NA	NA	NA	NA	NA	NA	NA	NA	NA	NA	NA	NA
TRIL	NA	NA	NA	NA	NA	NA	NA	NA	NA	NA	NA	NA	NA	NA
TRIM4	NA	NA	NA	NA	NA	NA	NA	NA	NA	NA	NA	NA	NA	NA
TRPM6	NA	NA	NA	NA	NA	NA	NA	NA	NA	NA	NA	NA	NA	NA
TRPM8	NA	NA	NA	NA	NA	NA	NA	NA	NA	NA	NA	NA	NA	NA
TSC2	NA	NA	NA	NA	NA	NA	NA	NA	NA	NA	NA	NA	NA	NA
UBA7	NA	NA	NA	NA	NA	NA	NA	NA	NA	NA	NA	NA	NA	NA
UBE2L6	NA	NA	NA	NA	NA	NA	NA	NA	NA	NA	NA	NA	NA	NA
UBE3B	NA	NA	NA	NA	NA	NA	NA	NA	NA	NA	NA	NA	NA	NA
UCK1	NA	NA	NA	NA	NA	NA	NA	NA	NA	NA	NA	NA	NA	NA
UNC45A	NA	NA	NA	NA	NA	NA	NA	NA	NA	NA	NA	NA	NA	NA
USP20	NA	NA	NA	NA	NA	NA	NA	NA	NA	NA	NA	NA	NA	NA
VAC14	NA	NA	NA	NA	NA	NA	NA	NA	NA	NA	NA	NA	NA	NA
VASH2	NA	NA	NA	NA	NA	NA	NA	NA	NA	NA	NA	NA	NA	NA
VPS8	NA	NA	NA	NA	NA	NA	NA	NA	NA	NA	NA	NA	NA	NA
VSX1	NA	NA	NA	NA	NA	NA	NA	NA	NA	NA	NA	NA	NA	NA
WASF2	NA	NA	NA	NA	NA	NA	NA	NA	NA	NA	NA	NA	NA	NA
WT1-AS	NA	NA	NA	NA	NA	NA	NA	NA	NA	NA	NA	NA	NA	NA
XAB2	NA	NA	NA	NA	NA	NA	NA	NA	NA	NA	NA	NA	NA	NA
YTHDF3	NA	NA	NA	NA	NA	NA	NA	NA	NA	NA	NA	NA	NA	NA
ZBTB48	NA	NA	NA	NA	NA	NA	NA	NA	NA	NA	NA	NA	NA	NA
ZBTB7C	NA	NA	NA	NA	NA	NA	NA	NA	NA	NA	NA	NA	NA	NA
ZFAT	NA	NA	NA	NA	NA	NA	NA	NA	NA	NA	NA	NA	NA	NA
ZFHX2	NA	NA	NA	NA	NA	NA	NA	NA	NA	NA	NA	NA	NA	NA
ZFP30	NA	NA	NA	NA	NA	NA	NA	NA	NA	NA	NA	NA	NA	NA
ZFP64	NA	NA	NA	NA	NA	NA	NA	NA	NA	NA	NA	NA	NA	NA
ZMAT4	NA	NA	NA	NA	NA	NA	NA	NA	NA	NA	NA	NA	NA	NA
ZMYM3	NA	NA	NA	NA	NA	NA	NA	NA	NA	NA	NA	NA	NA	NA
ZNF132	NA	NA	NA	NA	NA	NA	NA	NA	NA	NA	NA	NA	NA	NA
ZNF18	NA	NA	NA	NA	NA	NA	NA	NA	NA	NA	NA	NA	NA	NA
ZNF337	NA	NA	NA	NA	NA	NA	NA	NA	NA	NA	NA	NA	NA	NA
ZNF358	NA	NA	NA	NA	NA	NA	NA	NA	NA	NA	NA	NA	NA	NA
ZNF500	NA	NA	NA	NA	NA	NA	NA	NA	NA	NA	NA	NA	NA	NA
ZNF589	NA	NA	NA	NA	NA	NA	NA	NA	NA	NA	NA	NA	NA	NA
ZNF618	NA	NA	NA	NA	NA	NA	NA	NA	NA	NA	NA	NA	NA	NA
ZNF711	NA	NA	NA	NA	NA	NA	NA	NA	NA	NA	NA	NA	NA	NA
ZNF780B	NA	NA	NA	NA	NA	NA	NA	NA	NA	NA	NA	NA	NA	NA
ZNF81	NA	NA	NA	NA	NA	NA	NA	NA	NA	NA	NA	NA	NA	NA
ZNFX1	NA	NA	NA	NA	NA	NA	NA	NA	NA	NA	NA	NA	NA	NA
ZP1	NA	NA	NA	NA	NA	NA	NA	NA	NA	NA	NA	NA	NA	NA
ZSWIM3	NA	NA	NA	NA	NA	NA	NA	NA	NA	NA	NA	NA	NA	NA

## Sheet: GSE59861_24h_EMTAB2086
X1_sets_EMTAB2086_70_vs_30	X1_sets_EMTAB2086_80_vs_30	X1_sets_GSE59861_24h_2Gy	X1_sets_GSE59861_24h_5cGy	X2_sets_EMTAB2086_70_vs_30_EMTAB2086_80_vs_30	X2_sets_EMTAB2086_70_vs_30_GSE59861_24h_2Gy	X2_sets_EMTAB2086_70_vs_30_GSE59861_24h_5cGy	X2_sets_EMTAB2086_80_vs_30_GSE59861_24h_2Gy	X2_sets_EMTAB2086_80_vs_30_GSE59861_24h_5cGy	X2_sets_GSE59861_24h_2Gy_GSE59861_24h_5cGy	X3_sets_EMTAB2086_70_vs_30_EMTAB2086_80_vs_30_GSE59861_24h_2Gy	X3_sets_EMTAB2086_70_vs_30_EMTAB2086_80_vs_30_GSE59861_24h_5cGy	X3_sets_EMTAB2086_70_vs_30_GSE59861_24h_2Gy_GSE59861_24h_5cGy	X3_sets_EMTAB2086_80_vs_30_GSE59861_24h_2Gy_GSE59861_24h_5cGy	X4_sets_EMTAB2086_70_vs_30_EMTAB2086_80_vs_30_GSE59861_24h_2Gy_GSE59861_24h_5cGy
AAAS	AAAS	ABCD3	AADAT	AAAS	ARRB2	ATAD2	AMD1	AADAT	ABCD3	ARRB2	ATAD2	ATAD2	ANKRD11	ATAD2
ACD	AADAT	ABCE1	ABCD3	ACD	ASF1B	BEND3	ANKRD11	ABHD3	ABCE1	ASF1B	BEND3	BEND3	ATAD2	BEND3
ACTC1	AASDH	ACAN	ABCE1	ACTC1	ATAD2	CDC25A	ANLN	ANKRD11	ACTN1	ATAD2	CDC25A	CDC25A	BARD1	CDC25A
ACTR5	AASDHPPT	ACER3	ABHD3	ACTR5	AURKB	CDC45	ARHGAP11A	ATAD2	ACTR2	AURKB	CDC45	CDC45	BEND3	CDC45
ADAMTS3	AASS	ACSL1	ABL2	ADAMTS3	BEND3	CDC6	ARRB2	BARD1	ADRA1D	BEND3	CDC6	CDC6	BRCA1	CDC6
ADARB1	AATF	ACTN1	ACBD3	ADARB1	BIRC5	CDCA2	ASF1B	BEND3	AIDA	BIRC5	CDCA2	CDCA2	BUB3	CDCA2
ADCY3	ABCB7	ACTR2	ACOT11	ADCY3	BLM	CDCA7	ATAD2	BRCA1	ALCAM	BLM	CDCA7	CDCA7	CBL	CDCA7
ADPRH	ABCC9	ADPRHL1	ACTN1	AGK	C1ORF112	COQ3	AURKA	BUB3	ANGPTL4	C1ORF112	COQ3	COQ3	CCNE2	COQ3
AGK	ABCF2	ADRA1D	ACTR2	AGPAT5	C4ORF46	DHFR	AURKB	CBL	ANKRD11	C4ORF46	DHFR	DHFR	CCT5	DHFR
AGPAT5	ABCG2	AIDA	ADRA1D	AKAP1	CASP2	DIRAS3	BARD1	CCNE2	ANKRD13C	CASP2	DIRAS3	DIRAS3	CDC25A	DIRAS3
AKAP1	ABHD10	AKAP9	AIDA	AKR1E2	CCNA2	DNAJC9	BAZ1B	CCT2	AP3M2	CCNA2	DNAJC9	DNAJC9	CDC45	DNAJC9
AKR1E2	ABHD2	ALCAM	ALCAM	ALDH1A3	CCNF	DNMT1	BEND3	CCT5	ARGLU1	CCNF	DNMT1	DNMT1	CDC6	DNMT1
ALDH1A3	ABHD3	ALDH9A1	ALDH18A1	ALMS1	CDC25A	DTL	BIRC5	CDC25A	ARHGAP24	CDC25A	DTL	DTL	CDCA2	DTL
ALDH3A2	ABI2	AMD1	AMOTL1	AMOT	CDC25C	E2F8	BLM	CDC45	ARPC5L	CDC25C	E2F8	E2F8	CDCA7	E2F8
ALG9	ABI3	AMMECR1L	ANGPTL4	ANGEL2	CDC45	ESCO2	BRCA1	CDC6	ARRDC4	CDC45	ESCO2	ESCO2	CDT1	ESCO2
ALMS1	ABI3BP	ANGPTL4	ANKRD11	ANKRD28	CDC6	EXO1	BRD4	CDCA2	ASPH	CDC6	EXO1	EXO1	CENPL	EXO1
AMOT	ABT1	ANKRD11	ANKRD13C	ANP32A	CDCA2	FANCD2	BUB3	CDCA7	ATAD2	CDCA2	FANCD2	FEN1	CENPN	FEN1
ANGEL2	ACACA	ANKRD13C	AP3M2	ANP32B	CDCA3	FEN1	C1ORF112	CDT1	ATXN7L3B	CDCA3	FEN1	GATA2	CENPQ	GATA2
ANKRD28	ACAD10	ANLN	ARGLU1	AP1G2	CDCA4	GATA2	C4ORF46	CENPL	B4GALT4	CDCA4	GATA2	GINS1	CHD4	GINS1
ANP32A	ACAD9	AP3M2	ARHGAP24	APCDD1L	CDCA5	GEN1	CA12	CENPN	BARD1	CDCA5	GEN1	GINS2	CLSPN	GINS2
ANP32B	ACADM	ARGLU1	ARL2BP	APEX1	CDCA7	GINS1	CASP2	CENPQ	BCOR	CDCA7	GINS1	GINS3	COQ3	GINS3
AP1G2	ACAT1	ARHGAP11A	ARPC5L	APEX2	CDCA8	GINS2	CBL	CHD4	BEND3	CDCA8	GINS2	H3F3B	DEK	H3F3B
APCDD1L	ACAT2	ARHGAP24	ARRDC4	APOLD1	CDK1	GINS3	CCNA2	CLSPN	BICD2	CDK1	GINS3	HNRNPD	DHFR	HNRNPD
APEX1	ACBD6	ARMCX4	ASPH	AQR	CDKN2C	H3F3B	CCNE2	COQ3	BRCA1	CDKN2C	H3F3B	MCM10	DIRAS3	MCM10
APEX2	ACD	ARPC5L	ATAD2	ARHGAP32	CENPA	HNRNPD	CCNF	CSTF2	BUB3	CENPA	HNRNPD	MCM3	DKC1	MCM3
APOL4	ACIN1	ARRB2	ATF3	ARHGAP42	CENPO	HSPD1	CCT5	DEK	BZW2	CENPO	HSPD1	MCM4	DNAJC9	MCM4
APOLD1	ACSL3	ARRDC4	ATF7	ARHGEF26	CEP55	IL18R1	CDC23	DHFR	C3ORF52	CEP55	IL18R1	MCM6	DNMT1	MCM6
AQR	ACTC1	ASB6	ATP2B4	ARID2	CHAF1A	MBD4	CDC25A	DIAPH3	C6ORF106	CHAF1A	MCM10	NUP88	DTL	NUP88
ARHGAP32	ACTL6A	ASF1B	ATXN7L3B	ARID3B	CHAF1B	MCM10	CDC25C	DIRAS3	CAB39	CHAF1B	MCM3	ODC1	E2F8	ODC1
ARHGAP42	ACTR5	ASPH	B3GNT2	ARL9	CHEK1	MCM3	CDC45	DKC1	CALD1	CHEK1	MCM4	ORC1	EBNA1BP2	ORC1
ARHGEF26	ADAL	ATAD2	B4GALT4	ARRB2	COQ3	MCM4	CDC6	DNAJC9	CAP2	COQ3	MCM6	PKMYT1	EPS8	PKMYT1
ARID2	ADAMTS3	ATF6	BARD1	ARSI	DCLRE1B	MCM6	CDCA2	DNMT1	CBL	DCLRE1B	NUP88	POLE2	ESCO2	POLE2
ARID3B	ADAMTS6	ATOH8	BCOR	ASF1A	DEPDC1B	NUP88	CDCA3	DTL	CCND1	DEPDC1B	ODC1	PRIM1	EWSR1	PRIM1
ARL9	ADARB1	ATP10D	BECN1	ASF1B	DHFR	ODC1	CDCA4	E2F8	CCNE2	DHFR	ORC1	RAD51	EXO1	RAD51
ARRB2	ADAT2	ATXN7L3B	BEND3	ATAD2	DIRAS3	ORC1	CDCA5	EBNA1BP2	CCT5	DIRAS3	PKMYT1	RAD51AP1	FBXO5	RAD51AP1
ARSI	ADCY3	AURKA	BICC1	ATG4C	DNA2	PKMYT1	CDCA7	EPS8	CD44	DNA2	POLE2	RFC2	FEN1	RFC2
ASF1A	ADNP	AURKB	BICD2	AURKB	DNAJC9	POLE2	CDCA8	ESCO2	CD83	DNAJC9	PPIL1	RFC3	FERMT1	RFC3
ASF1B	ADNP2	B4GALT4	BIRC3	AUTS2	DNMT1	PPIL1	CDK1	EWSR1	CDC25A	DNMT1	PRIM1	RFC4	FUS	RFC4
ATAD2	ADSL	BAG5	BRCA1	AXL	DSN1	PRIM1	CDK2	EXO1	CDC45	DSN1	RAD51	RFWD3	G3BP1	RFWD3
ATG4C	AFG3L2	BARD1	BUB3	B3GALNT1	DTL	RAD51	CDKN2C	FANCD2	CDC6	DTL	RAD51AP1	RIMKLB	GABPB1	RPA2
AURKB	AGBL2	BAZ1B	BZW2	B3GALT1	E2F1	RAD51AP1	CDT1	FBXO5	CDCA2	E2F1	RFC2	RPA2	GART	RRM1
AUTS2	AGK	BCOR	C3ORF52	B3GNT5	E2F8	RFC2	CENPA	FEN1	CDCA7	E2F8	RFC3	RRM1	GATA2	SFXN2
AXL	AGPAT4	BEND3	C6ORF106	B4GALT5	ESCO2	RFC3	CENPI	FERMT1	CDH11	ESCO2	RFC4	SFXN2	GINS1	SMC1A
B3GALNT1	AGPAT5	BICD2	CAB39	B4GALT6	ESPL1	RFC4	CENPL	FUS	CDK6	ESPL1	RFWD3	SMC1A	GINS2	SNRPD1
B3GALT1	AHI1	BIRC5	CALD1	BCL2L11	EXO1	RFWD3	CENPN	G3BP1	CDKL3	EXO1	RPA2	SNRPD1	GINS3	SRSF1
B3GNT5	AKAP1	BLM	CAMKK2	BCL3	EXOSC2	RIMKLB	CENPO	GABPB1	CDT1	EXOSC2	RPP30	SRSF1	GINS4	SRSF2
B4GALT5	AKAP7	BRCA1	CAP2	BCL9	EXOSC8	RPA2	CENPQ	GART	CENPL	EXOSC8	RRM1	SRSF2	GNPNAT1	SRSF7
B4GALT6	AKIRIN2	BRD4	CAPZA1	BCLAF1	EZH2	RPP30	CEP55	GATA2	CENPN	EZH2	SFXN2	SRSF7	GREM2	STIL
BCL2L11	AKR1C1	BUB3	CBL	BCS1L	FAM83D	RRM1	CHAF1A	GEN1	CENPQ	FAM83D	SMC1A	STIL	H3F3B	TCERG1
BCL3	AKR1E2	BZW2	CCND1	BEND3	FANCA	SFXN2	CHAF1B	GINS1	CFLAR	FANCA	SNRPD1	TCERG1	HNRNPD	TCF19
BCL9	ALDH1A3	C15ORF32	CCND3	BIRC5	FANCI	SMC1A	CHD1L	GINS2	CHD4	FANCI	SRSF1	TCF19	HSPH1	TIPIN
BCLAF1	ALG14	C1ORF112	CCNE2	BLM	FEN1	SNRPD1	CHD4	GINS3	CITED2	FEN1	SRSF2	TIPIN	ID1	TMPO
BCS1L	ALG6	C1ORF174	CCT2	BNC1	GATA2	SRSF1	CHEK1	GINS4	CLCF1	GATA2	SRSF7	TMPO	ID4	TOP1
BEND3	ALKBH1	C3ORF52	CCT5	BRD7	GINS1	SRSF2	CKAP2L	GNL3	CLDN1	GINS1	STIL	TOP1	ILF3	TXNRD1
BIRC5	ALKBH8	C3ORF70	CD44	BRIX1	GINS2	SRSF7	CKS2	GNPNAT1	CLIC4	GINS2	TCERG1	TXNRD1	LANCL2	UBE2T
BLM	ALMS1	C4ORF46	CD83	BUB1	GINS3	STIL	CLSPN	GPD2	CLSPN	GINS3	TCF19	UBE2T	LRRC59	UHRF1
BNC1	ALPK1	C6ORF106	CDC25A	BUD13	GMNN	TCERG1	COQ3	GREM2	CNST	GMNN	TIPIN	UHRF1	LSG1	WDR76
BRD7	AMD1	C9ORF3	CDC42SE1	C10ORF82	GTSE1	TCF19	DARS2	H3F3B	COQ3	GTSE1	TMPO	WDR76	MASTL	ZNF367
BRIX1	AMMECR1	CA12	CDC45	C17ORF53	H2AFX	TIPIN	DBF4	HAT1	CREB5	H2AFX	TOP1	ZNF367	MAT2A	ZWINT
BUB1	AMOT	CAB39	CDC6	C19ORF44	H3F3B	TMPO	DCLRE1B	HNRNPD	CSRP1	H3F3B	TXNRD1	ZWINT	MCM10	NA
BUD13	AMPH	CALD1	CDC73	C19ORF48	HAUS8	TOP1	DEK	HSPA14	CTNNB1	HAUS8	UBE2T	NA	MCM3	NA
C10ORF82	ANAPC1	CALR	CDCA2	C1ORF112	HELLS	TXNRD1	DEPDC1	HSPD1	CXCL5	HELLS	UHRF1	NA	MCM4	NA
C17ORF53	ANGEL2	CAP2	CDCA7	C1ORF21	HIPK2	UBE2T	DEPDC1B	HSPH1	CYTH2	HIPK2	ULBP3	NA	MCM6	NA
C19ORF44	ANKRD11	CASP2	CDH11	C1ORF220	HIST1H4C	UHRF1	DHFR	ID1	DEK	HIST1H4C	WDR76	NA	MEF2C	NA
C19ORF48	ANKRD13A	CBL	CDK6	C20ORF96	HJURP	ULBP3	DIDO1	ID4	DENND3	HJURP	ZNF326	NA	NFIC	NA
C1ORF112	ANKRD28	CBLN2	CDKL3	C3ORF14	HMGB2	WDR76	DIRAS3	IDH3A	DHFR	HMGB2	ZNF367	NA	NUP88	NA
C1ORF21	ANKRD50	CCDC22	CDT1	C4ORF46	HNRNPD	ZNF326	DKC1	IL18R1	DIRAS3	HNRNPD	ZWINT	NA	ODC1	NA
C1ORF220	ANLN	CCDC80	CENPL	CABLES2	ITGB3BP	ZNF367	DNA2	ILF3	DKC1	ITGB3BP	NA	NA	ORC1	NA
C20ORF96	ANP32A	CCDC81	CENPN	CACHD1	KHDRBS1	ZWINT	DNAJC9	ING3	DLX1	KHDRBS1	NA	NA	ORC6	NA
C3ORF14	ANP32B	CCNA2	CENPQ	CACYBP	KIF11	NA	DNMT1	LANCL2	DLX2	KIF11	NA	NA	PKMYT1	NA
C4ORF46	ANP32E	CCND1	CFLAR	CAD	KIF22	NA	DSN1	LARP7	DNAJC1	KIF22	NA	NA	POLE2	NA
CABLES2	AP1G2	CCNE2	CHD4	CALML4	KIF2C	NA	DTL	LRRC59	DNAJC9	KIF2C	NA	NA	PPIF	NA
CACHD1	AP4B1	CCNF	CITED2	CAMK1G	KIF4A	NA	E2F1	LSG1	DNMT1	KIF4A	NA	NA	PPM1B	NA
CACYBP	AP4S1	CCNJL	CLCF1	CAMK4	KIFC1	NA	E2F8	MASTL	DTL	KIFC1	NA	NA	PRIM1	NA
CAD	APCDD1L	CCT5	CLDN1	CASP2	LMNB1	NA	EBNA1BP2	MAT2A	DUSP1	LMNB1	NA	NA	PRRX1	NA
CALML4	APEX1	CD44	CLIC4	CBX5	LMNB2	NA	EPS8	MCM10	DUSP2	LMNB2	NA	NA	RAD21	NA
CAMK1G	APEX2	CD83	CLSPN	CCDC134	MAD2L1	NA	ERCC3	MCM3	DYNC1H1	MAD2L1	NA	NA	RAD51	NA
CAMK4	APH1A	CD86	CNST	CCDC138	MCM10	NA	ERCC6L	MCM4	DYNLT1	MCM10	NA	NA	RAD51AP1	NA
CARHSP1	API5	CDC23	COQ10B	CCDC34	MCM2	NA	ESCO2	MCM6	E2F8	MCM2	NA	NA	RBM22	NA
CASP2	APOBEC3F	CDC25A	COQ3	CCDC58	MCM3	NA	ESPL1	MED6	EBNA1BP2	MCM3	NA	NA	RFC2	NA
CBX5	APOLD1	CDC25C	CORO1C	CCDC77	MCM4	NA	EWSR1	MEF2C	EIF2AK1	MCM4	NA	NA	RFC3	NA
CCDC134	APOO	CDC42	CPPED1	CCDC86	MCM6	NA	EXO1	MPHOSPH6	EIF2S1	MCM6	NA	NA	RFC4	NA
CCDC138	AQR	CDC42SE2	CREB5	CCDC89	MCM7	NA	EXOG	NFIC	EIF4G1	MCM7	NA	NA	RFWD3	NA
CCDC3	ARAP3	CDC45	CSRP1	CCDC97	MKI67	NA	EXOSC2	NR1D2	ENC1	MKI67	NA	NA	RGS12	NA
CCDC34	ARHGAP11A	CDC6	CSTF2	CCNA2	MND1	NA	EXOSC8	NUP160	EPS8	MND1	NA	NA	RPA2	NA
CCDC58	ARHGAP17	CDCA2	CTNNB1	CCNB1	MSH6	NA	EZH2	NUP43	EREG	MSH6	NA	NA	RRM1	NA
CCDC77	ARHGAP32	CDCA3	CXCL5	CCNB2	MXD3	NA	FAM83D	NUP88	ESCO2	MXD3	NA	NA	RRM2	NA
CCDC86	ARHGAP42	CDCA4	CYTH2	CCNF	NCAPD3	NA	FANCA	ODC1	ETS1	NCAPD3	NA	NA	SAE1	NA
CCDC89	ARHGDIA	CDCA5	DCAF7	CD320	NCAPG2	NA	FANCI	ORC1	ETV5	NCAPG2	NA	NA	SCLT1	NA
CCDC97	ARHGEF11	CDCA7	DCBLD2	CDC20	NCAPH	NA	FBXO5	ORC6	EWSR1	NCAPH	NA	NA	SFXN2	NA
CCNA2	ARHGEF2	CDCA8	DCUN1D4	CDC25A	NDC80	NA	FEN1	PITPNB	EXO1	NDC80	NA	NA	SKP2	NA
CCNB1	ARHGEF26	CDH11	DEK	CDC25B	NEIL3	NA	FERMT1	PKMYT1	F3	NEIL3	NA	NA	SLC7A1	NA
CCNB2	ARID1A	CDK1	DENND3	CDC25C	NR2C2AP	NA	FN3KRP	POLE2	FAF2	NR2C2AP	NA	NA	SLC7A2	NA
CCNF	ARID1B	CDK13	DHFR	CDC45	NUP205	NA	FUS	POLR2C	FAM107B	NUP205	NA	NA	SMC1A	NA
CD320	ARID2	CDK2	DIAPH3	CDC6	NUP214	NA	G3BP1	PPIF	FAM120A	NUP214	NA	NA	SNRPD1	NA
CDC20	ARID3B	CDK5R1	DIRAS3	CDC7	NUP88	NA	GABPB1	PPIL1	FBXO5	NUP88	NA	NA	SRSF1	NA
CDC25A	ARL13B	CDK6	DKC1	CDCA2	NUSAP1	NA	GART	PPM1B	FCRLB	NUSAP1	NA	NA	SRSF2	NA
CDC25B	ARL4A	CDKL3	DLX1	CDCA3	OAS3	NA	GATA2	PRIM1	FEN1	OAS3	NA	NA	SRSF6	NA
CDC25C	ARL5A	CDKN2C	DLX2	CDCA4	ODC1	NA	GINS1	PRRX1	FERMT1	ODC1	NA	NA	SRSF7	NA
CDC45	ARL6IP1	CDT1	DNAJB4	CDCA5	OIP5	NA	GINS2	PTPN2	FGD4	OIP5	NA	NA	STIL	NA
CDC6	ARL9	CENPA	DNAJC1	CDCA7	ORC1	NA	GINS3	RAD18	FGF1	ORC1	NA	NA	TBL1X	NA
CDC7	ARMC10	CENPI	DNAJC9	CDCA7L	PARP1	NA	GINS4	RAD21	FGF5	PARP1	NA	NA	TCERG1	NA
CDCA2	ARMC6	CENPL	DNMT1	CDCA8	PBK	NA	GJC1	RAD51	FGFR3	PBK	NA	NA	TCF19	NA
CDCA3	ARNTL2	CENPN	DTD1	CDK1	PCDH10	NA	GMNN	RAD51AP1	FLT1	PKMYT1	NA	NA	TIA1	NA
CDCA4	ARRB2	CENPO	DTL	CDK16	PKMYT1	NA	GNPNAT1	RBM22	FOS	PLK4	NA	NA	TIPIN	NA
CDCA5	ARSI	CENPQ	DUSP1	CDK4	PLK4	NA	GREM2	RFC2	FOXC1	POLA1	NA	NA	TJP2	NA
CDCA7	ARSJ	CEP55	DUSP2	CDKAL1	POLA1	NA	GTSE1	RFC3	FOXC2	POLA2	NA	NA	TMEM220	NA
CDCA7L	ASF1A	CFLAR	DYNC1H1	CDKN1B	POLA2	NA	H2AFX	RFC4	FOXP1	POLD3	NA	NA	TMPO	NA
CDCA8	ASF1B	CHAF1A	DYNLT1	CDKN2C	POLD3	NA	H3F3B	RFWD3	FRMD3	POLE	NA	NA	TOP1	NA
CDK1	ASPM	CHAF1B	E2F8	CDKN3	POLE	NA	HAUS8	RGS12	FUS	POLE2	NA	NA	TRA2B	NA
CDK16	ASTE1	CHD1L	EBNA1BP2	CENPA	POLE2	NA	HELLS	RPA2	G3BP1	PRC1	NA	NA	TSEN15	NA
CDK4	ASXL1	CHD4	EFR3A	CENPF	PRC1	NA	HIPK2	RPP30	GABBR2	PRIM1	NA	NA	TXNRD1	NA
CDKAL1	ASXL2	CHEK1	EHD1	CENPH	PRIM1	NA	HIST1H2BN	RRM1	GABPB1	PSRC1	NA	NA	UBE2T	NA
CDKN1B	ATAD2	CHST3	EIF2AK1	CENPJ	PSRC1	NA	HIST1H4C	RRM2	GAPVD1	RACGAP1	NA	NA	UHRF1	NA
CDKN2AIPNL	ATAD2B	CHSY1	EIF2S1	CENPM	RACGAP1	NA	HJURP	RSRC2	GART	RAD51	NA	NA	WDR4	NA
CDKN2C	ATAD5	CITED2	EIF4G1	CENPO	RAD51	NA	HMGB1	SAE1	GATA2	RAD51AP1	NA	NA	WDR76	NA
CDKN3	ATAT1	CKAP2L	ELF1	CENPP	RAD51AP1	NA	HMGB2	SCLT1	GCLM	RAD54L	NA	NA	ZNF367	NA
CDON	ATF1	CKAP4	ELK4	CENPW	RAD54L	NA	HNRNPA0	SFXN2	GINS1	RANBP1	NA	NA	ZWINT	NA
CENPA	ATF7IP	CKS2	ELL2	CEP250	RANBP1	NA	HNRNPAB	SKP2	GINS2	RFC2	NA	NA	NA	NA
CENPF	ATG4C	CLCF1	EMP1	CEP55	RFC2	NA	HNRNPD	SLC35D1	GINS3	RFC3	NA	NA	NA	NA
CENPH	ATIC	CLDN1	ENAH	CEP57	RFC3	NA	HNRNPR	SLC7A1	GINS4	RFC4	NA	NA	NA	NA
CENPJ	ATL2	CLIC4	ENC1	CEP72	RFC4	NA	HSPH1	SLC7A2	GLI2	RFC5	NA	NA	NA	NA
CENPM	ATN1	CLSPN	ENTPD7	CHAF1A	RFC5	NA	ID1	SMARCA2	GLIPR1	RFWD3	NA	NA	NA	NA
CENPO	ATP11C	CLSTN1	EPS8	CHAF1B	RFWD3	NA	ID4	SMC1A	GLIS3	RNASEH2A	NA	NA	NA	NA
CENPP	ATP2B1	CMTM4	EREG	CHEK1	RIMKLB	NA	ILF3	SNRPD1	GNB1	RPA2	NA	NA	NA	NA
CENPW	ATPAF1	CNST	ESCO2	CHEK2	RNASEH2A	NA	ITGB3BP	SRSF1	GNPNAT1	RRM1	NA	NA	NA	NA
CEP250	ATR	COQ3	ETS1	CHKA	RPA2	NA	KHDRBS1	SRSF2	GREM2	SFXN2	NA	NA	NA	NA
CEP55	ATXN2L	COTL1	ETV5	CHRNA5	RRM1	NA	KHDRBS3	SRSF3	GTPBP4	SHCBP1	NA	NA	NA	NA
CEP57	AURKA	CREB5	EWSR1	CHTF18	SFXN2	NA	KIF11	SRSF6	H3F3B	SHMT1	NA	NA	NA	NA
CEP72	AURKB	CSRP1	EXO1	CIDEB	SHCBP1	NA	KIF22	SRSF7	HBEGF	SKA3	NA	NA	NA	NA
CHAF1A	AUTS2	CTGF	F3	CIT	SHMT1	NA	KIF23	STIL	HEATR5A	SMAP2	NA	NA	NA	NA
CHAF1B	AXL	CTNNB1	FAF2	CKS1B	SKA3	NA	KIF2C	STIP1	HMGA2	SMARCA4	NA	NA	NA	NA
CHD7	B3GALNT1	CXCL5	FAM107B	CLN6	SMAP2	NA	KIF4A	TBL1X	HNRNPD	SMARCC1	NA	NA	NA	NA
CHEK1	B3GALNT2	CYTH2	FAM120A	CNDP2	SMARCA4	NA	KIFC1	TCERG1	HP1BP3	SMC1A	NA	NA	NA	NA
CHEK2	B3GALT1	DARS2	FANCD2	CNKSR3	SMARCC1	NA	LANCL2	TCF19	HSPA8	SNRNP40	NA	NA	NA	NA
CHKA	B3GNT5	DBF4	FBXO5	CNOT10	SMC1A	NA	LMAN2L	TIA1	HSPH1	SNRPD1	NA	NA	NA	NA
CHRNA5	B4GALT5	DCK	FCRLB	CNOT6	SNRNP40	NA	LMNB1	TIPIN	ID1	SORD	NA	NA	NA	NA
CHTF18	B4GALT6	DCLRE1B	FEN1	CNOT6L	SNRPD1	NA	LMNB2	TJP2	ID4	SPAG5	NA	NA	NA	NA
CIDEB	BAALC	DEFB116	FERMT1	COLEC12	SORD	NA	LRRC59	TMEM220	IGFBP3	SPC24	NA	NA	NA	NA
CIT	BAG1	DEK	FGD4	COMMD10	SPAG5	NA	LSG1	TMPO	IL6	SPC25	NA	NA	NA	NA
CKS1B	BAG2	DENND3	FGF1	COMMD4	SPC24	NA	MAD2L1	TOP1	IL7R	SPEN	NA	NA	NA	NA
CLN6	BANF1	DEPDC1	FGF5	COQ2	SPC25	NA	MASTL	TRA2B	ILF3	SRSF1	NA	NA	NA	NA
CNDP2	BARD1	DEPDC1B	FGFR3	COQ3	SPEN	NA	MAT2A	TSEN15	INHBB	SRSF2	NA	NA	NA	NA
CNKSR3	BAZ1A	DHFR	FLT1	CORO1A	SRSF1	NA	MCM10	TXNRD1	IPPK	SRSF7	NA	NA	NA	NA
CNOT10	BAZ1B	DIAPH1	FOS	CPNE2	SRSF2	NA	MCM2	UBE2T	IRX5	SSRP1	NA	NA	NA	NA
CNOT6	BCCIP	DIDO1	FOXC1	CPSF4	SRSF7	NA	MCM3	UBXN2A	JAG1	STIL	NA	NA	NA	NA
CNOT6L	BCL2L11	DIRAS3	FOXC2	CPSF6	SSRP1	NA	MCM4	UHRF1	JUN	TACC3	NA	NA	NA	NA
COLEC12	BCL2L12	DKC1	FOXP1	CPSF7	STIL	NA	MCM6	ULBP3	KBTBD2	TCERG1	NA	NA	NA	NA
COMMD10	BCL3	DLGAP4	FPGS	CPXM1	TACC3	NA	MCM7	WDR4	KCTD20	TCF19	NA	NA	NA	NA
COMMD4	BCL9	DLX1	FRMD3	CRISPLD1	TCERG1	NA	MEF2C	WDR76	LANCL2	TDP1	NA	NA	NA	NA
COQ2	BCLAF1	DLX2	FUS	CSE1L	TCF19	NA	MELK	ZNF326	LCP1	TIPIN	NA	NA	NA	NA
COQ3	BCS1L	DNA2	G3BP1	CTCF	TDP1	NA	MKI67	ZNF367	LRP8	TLE3	NA	NA	NA	NA
CORO1A	BEND3	DNAJC1	GABBR2	CTDSPL2	TIPIN	NA	MND1	ZWINT	LRRC59	TMPO	NA	NA	NA	NA
CPNE2	BEND6	DNAJC9	GABPB1	CTTNBP2	TLE3	NA	MSH6	NA	LRRFIP1	TOP1	NA	NA	NA	NA
CPSF4	BHLHB9	DNMT1	GAPVD1	CWF19L1	TMPO	NA	MXD3	NA	LSG1	TRIP13	NA	NA	NA	NA
CPSF6	BIN3	DOCK7	GART	CXCL12	TOP1	NA	NCAPD3	NA	LYN	TXNRD1	NA	NA	NA	NA
CPSF7	BIRC5	DR1	GATA2	CYB5RL	TRIP13	NA	NCAPG	NA	MALL	TYMS	NA	NA	NA	NA
CPXM1	BLM	DSN1	GCLM	CYP1B1	TXNRD1	NA	NCAPG2	NA	MAP1B	UBE2T	NA	NA	NA	NA
CRISPLD1	BLMH	DTL	GEN1	DAZAP1	TYMS	NA	NCAPH	NA	MASTL	UHRF1	NA	NA	NA	NA
CSE1L	BMPR1A	DUSP1	GINS1	DBF4B	UBE2T	NA	NDC80	NA	MAT2A	WDR76	NA	NA	NA	NA
CTCF	BMPR1B	DUSP2	GINS2	DCAF15	UHRF1	NA	NEIL3	NA	MCFD2	WWC1	NA	NA	NA	NA
CTDSPL2	BNC1	DYNC1H1	GINS3	DCLK2	WDR76	NA	NFIC	NA	MCM10	ZNF367	NA	NA	NA	NA
CTTNBP2	BOD1	DYNLT1	GINS4	DCLRE1B	WWC1	NA	NHSL1	NA	MCM3	ZWINT	NA	NA	NA	NA
CWF19L1	BOP1	E2F1	GJA5	DCLRE1C	ZNF367	NA	NR2C2AP	NA	MCM4	NA	NA	NA	NA	NA
CXCL12	BRCA1	E2F2	GLI2	DCPS	ZWINT	NA	NUDT15	NA	MCM6	NA	NA	NA	NA	NA
CYB5R2	BRCA2	E2F8	GLIPR1	DENND4B	NA	NA	NUP153	NA	MEF2C	NA	NA	NA	NA	NA
CYB5RL	BRD1	EBNA1BP2	GLIS3	DEPDC1B	NA	NA	NUP205	NA	MEI1	NA	NA	NA	NA	NA
CYP1B1	BRD2	EHD4	GMPPA	DET1	NA	NA	NUP214	NA	MIER1	NA	NA	NA	NA	NA
DAZAP1	BRD3	EIF2AK1	GNB1	DHFR	NA	NA	NUP88	NA	MPP5	NA	NA	NA	NA	NA
DBF4B	BRD4	EIF2S1	GNB4	DHX30	NA	NA	NUSAP1	NA	MTHFD2	NA	NA	NA	NA	NA
DCAF15	BRD7	EIF4G1	GNL3	DHX33	NA	NA	NVL	NA	MYO10	NA	NA	NA	NA	NA
DCLK2	BRD8	ENC1	GNPNAT1	DHX9	NA	NA	OAS3	NA	NCALD	NA	NA	NA	NA	NA
DCLRE1B	BRD9	EPS8	GOLPH3	DIRAS3	NA	NA	ODC1	NA	NCOA1	NA	NA	NA	NA	NA
DCLRE1C	BRIP1	EPX	GPD2	DIS3L	NA	NA	OIP5	NA	NEDD4L	NA	NA	NA	NA	NA
DCPS	BRIX1	ERCC3	GREM2	DLEU1	NA	NA	ORC1	NA	NEDD9	NA	NA	NA	NA	NA
DENND4B	BRPF1	ERCC6L	GTPBP4	DMC1	NA	NA	ORC6	NA	NES	NA	NA	NA	NA	NA
DEPDC1B	BRPF3	EREG	H3F3B	DNA2	NA	NA	PAQR4	NA	NFIC	NA	NA	NA	NA	NA
DES	BTBD11	ESCO2	HADHA	DNAJA4	NA	NA	PARP1	NA	NMNAT2	NA	NA	NA	NA	NA
DET1	BTG3	ESPL1	HAT1	DNAJC9	NA	NA	PBK	NA	NOG	NA	NA	NA	NA	NA
DHFR	BTN3A1	ETS1	HBEGF	DNMT1	NA	NA	PDCD11	NA	NRG1	NA	NA	NA	NA	NA
DHX30	BTN3A2	ETV5	HEATR5A	DOK5	NA	NA	PDSS1	NA	NTM	NA	NA	NA	NA	NA
DHX33	BUB1	EWSR1	HIST2H2BE	DOK6	NA	NA	PIGW	NA	NUP88	NA	NA	NA	NA	NA
DHX9	BUB3	EXO1	HMGA2	DOLPP1	NA	NA	PKMYT1	NA	ODC1	NA	NA	NA	NA	NA
DIRAS3	BUD13	EXOG	HNRNPD	DPF1	NA	NA	PLK4	NA	ORC1	NA	NA	NA	NA	NA
DIS3L	BUD31	EXOSC2	HP1BP3	DSC3	NA	NA	PMS1	NA	ORC6	NA	NA	NA	NA	NA
DLEU1	BYSL	EXOSC8	HSPA14	DSG2	NA	NA	POLA1	NA	OXTR	NA	NA	NA	NA	NA
DMC1	C10ORF82	EZH2	HSPA5	DSN1	NA	NA	POLA2	NA	PAPSS2	NA	NA	NA	NA	NA
DNA2	C11ORF49	F3	HSPA8	DTL	NA	NA	POLD3	NA	PDCD1LG2	NA	NA	NA	NA	NA
DNAJA4	C11ORF58	FABP6	HSPD1	DTYMK	NA	NA	POLE	NA	PDLIM5	NA	NA	NA	NA	NA
DNAJC9	C12ORF45	FAF2	HSPH1	DUS3L	NA	NA	POLE2	NA	PDP1	NA	NA	NA	NA	NA
DNM3	C12ORF65	FAM107B	ID1	DVL2	NA	NA	POLR1E	NA	PHACTR2	NA	NA	NA	NA	NA
DNMT1	C12ORF66	FAM120A	ID3	E2F1	NA	NA	PPIF	NA	PHLDA2	NA	NA	NA	NA	NA
DOK5	C14ORF93	FAM83D	ID4	E2F8	NA	NA	PPM1B	NA	PICALM	NA	NA	NA	NA	NA
DOK6	C15ORF41	FANCA	IDH3A	EARS2	NA	NA	PRC1	NA	PKMYT1	NA	NA	NA	NA	NA
DOLPP1	C17ORF53	FANCI	IGFBP3	EBP	NA	NA	PRIM1	NA	PLAUR	NA	NA	NA	NA	NA
DPF1	C17ORF75	FBXO5	IL18R1	ECHDC3	NA	NA	PRIM2	NA	PLEK2	NA	NA	NA	NA	NA
DPPA4	C17ORF80	FCRLB	IL6	EEF1A1	NA	NA	PRPF40A	NA	PNP	NA	NA	NA	NA	NA
DRD1	C17ORF97	FEN1	IL7R	EEFSEC	NA	NA	PRRX1	NA	POLE2	NA	NA	NA	NA	NA
DSC3	C18ORF21	FERMT1	ILF3	EFTUD2	NA	NA	PSMC3IP	NA	POLE3	NA	NA	NA	NA	NA
DSG2	C18ORF54	FGD4	IMPA1	EHMT2	NA	NA	PSRC1	NA	PPIA	NA	NA	NA	NA	NA
DSN1	C19ORF44	FGF1	ING3	ELAVL1	NA	NA	RACGAP1	NA	PPIF	NA	NA	NA	NA	NA
DTL	C19ORF48	FGF5	INHBB	ELF2	NA	NA	RAD21	NA	PPM1B	NA	NA	NA	NA	NA
DTYMK	C1ORF109	FGFR3	INPP5A	EME1	NA	NA	RAD51	NA	PPP4R1	NA	NA	NA	NA	NA
DUS3L	C1ORF112	FKBP15	IPPK	EMG1	NA	NA	RAD51AP1	NA	PRIM1	NA	NA	NA	NA	NA
DVL2	C1ORF21	FKBP9	IQGAP1	ENPP2	NA	NA	RAD54L	NA	PRRX1	NA	NA	NA	NA	NA
E2F1	C1ORF220	FLT1	IRX5	EPB41	NA	NA	RANBP1	NA	PTK2	NA	NA	NA	NA	NA
E2F8	C1ORF74	FMN2	ITGB1BP1	ERCC8	NA	NA	RBM22	NA	PURB	NA	NA	NA	NA	NA
EARS2	C1QBP	FN3KRP	ITGB1BP2	ERI1	NA	NA	RFC2	NA	PVR	NA	NA	NA	NA	NA
EBP	C20ORF96	FOS	JAG1	ERI2	NA	NA	RFC3	NA	RAD21	NA	NA	NA	NA	NA
ECHDC3	C21ORF58	FOXC1	JUN	ERLIN1	NA	NA	RFC4	NA	RAD51	NA	NA	NA	NA	NA
EEF1A1	C21ORF91	FOXC2	KBTBD2	ESCO2	NA	NA	RFC5	NA	RAD51AP1	NA	NA	NA	NA	NA
EEFSEC	C2ORF42	FOXD1	KCNH6	ESPL1	NA	NA	RFWD3	NA	RASL11B	NA	NA	NA	NA	NA
EFTUD2	C2ORF69	FOXL1	KCTD20	EXO1	NA	NA	RGS12	NA	RBM22	NA	NA	NA	NA	NA
EHMT2	C3ORF14	FOXP1	KDM4A	EXOSC2	NA	NA	RIF1	NA	RBM24	NA	NA	NA	NA	NA
ELAVL1	C3ORF67	FRMD3	KIRREL3	EXOSC3	NA	NA	RNASEH2A	NA	RBM25	NA	NA	NA	NA	NA
ELF2	C4ORF33	FUS	KLHL9	EXOSC5	NA	NA	RPA2	NA	RBM6	NA	NA	NA	NA	NA
EME1	C4ORF46	FZD1	KRT72	EXOSC8	NA	NA	RRM1	NA	RBM8A	NA	NA	NA	NA	NA
EMG1	C5	G3BP1	LANCL2	EXOSC9	NA	NA	RRM2	NA	RCAN1	NA	NA	NA	NA	NA
ENDOD1	C5ORF34	GABBR2	LARP7	EZH2	NA	NA	SAE1	NA	RFC2	NA	NA	NA	NA	NA
ENOX1	C7ORF26	GABPB1	LCP1	FAF1	NA	NA	SCLT1	NA	RFC3	NA	NA	NA	NA	NA
ENPP2	C7ORF31	GAPVD1	LRP2	FAM110B	NA	NA	SFMBT1	NA	RFC4	NA	NA	NA	NA	NA
EPB41	C8ORF33	GART	LRP8	FAM111B	NA	NA	SFXN2	NA	RFWD3	NA	NA	NA	NA	NA
EPHA3	C8ORF48	GATA2	LRRC59	FAM129A	NA	NA	SHCBP1	NA	RGS12	NA	NA	NA	NA	NA
ERCC8	C8ORF59	GCLM	LRRFIP1	FAM162B	NA	NA	SHMT1	NA	RHOBTB1	NA	NA	NA	NA	NA
ERI1	C9ORF64	GINS1	LSG1	FAM192A	NA	NA	SKA1	NA	RIMKLB	NA	NA	NA	NA	NA
ERI2	CA12	GINS2	LYN	FAM49A	NA	NA	SKA3	NA	RNF145	NA	NA	NA	NA	NA
ERLIN1	CABLES2	GINS3	MALL	FAM83B	NA	NA	SKP2	NA	RNFT1	NA	NA	NA	NA	NA
ESCO2	CACHD1	GINS4	MAP1B	FAM83D	NA	NA	SLBP	NA	RPA2	NA	NA	NA	NA	NA
ESPL1	CACYBP	GJC1	MAP3K2	FANCA	NA	NA	SLC7A1	NA	RPS14	NA	NA	NA	NA	NA
EXO1	CAD	GLI2	MAS1L	FANCB	NA	NA	SLC7A2	NA	RRBP1	NA	NA	NA	NA	NA
EXOSC2	CADPS2	GLIPR1	MASTL	FANCC	NA	NA	SMAP2	NA	RRM1	NA	NA	NA	NA	NA
EXOSC3	CALCRL	GLIS3	MAT2A	FANCD2	NA	NA	SMARCA4	NA	RRM2	NA	NA	NA	NA	NA
EXOSC5	CALM3	GMNN	MBD4	FANCE	NA	NA	SMARCC1	NA	S1PR1	NA	NA	NA	NA	NA
EXOSC8	CALML4	GNB1	MBNL1	FANCG	NA	NA	SMC1A	NA	S1PR5	NA	NA	NA	NA	NA
EXOSC9	CAMK1G	GNPNAT1	MCFD2	FANCI	NA	NA	SNRNP40	NA	SAE1	NA	NA	NA	NA	NA
EZH2	CAMK4	GRB2	MCM10	FANCL	NA	NA	SNRPD1	NA	SAFB2	NA	NA	NA	NA	NA
FAF1	CAMSAP1	GREM2	MCM3	FASN	NA	NA	SORD	NA	SAMD4A	NA	NA	NA	NA	NA
FAM110B	CARD8	GTPBP4	MCM4	FAT3	NA	NA	SPAG5	NA	SCLT1	NA	NA	NA	NA	NA
FAM111B	CARM1	GTSE1	MCM6	FBL	NA	NA	SPC24	NA	SERPINB2	NA	NA	NA	NA	NA
FAM129A	CASC3	H2AFX	MED6	FDXACB1	NA	NA	SPC25	NA	SERPINB8	NA	NA	NA	NA	NA
FAM13C	CASP2	H3F3B	MEF2C	FEN1	NA	NA	SPEN	NA	SERPINE1	NA	NA	NA	NA	NA
FAM162B	CASP6	HAUS8	MEI1	FKBP4	NA	NA	SRSF1	NA	SETD7	NA	NA	NA	NA	NA
FAM192A	CASP7	HBEGF	MICAL3	FLOT1	NA	NA	SRSF2	NA	SFXN2	NA	NA	NA	NA	NA
FAM49A	CASP8	HEATR5A	MIER1	FLVCR1	NA	NA	SRSF6	NA	SH3KBP1	NA	NA	NA	NA	NA
FAM83B	CASP8AP2	HELLS	MLEC	FOXM1	NA	NA	SRSF7	NA	SH3RF1	NA	NA	NA	NA	NA
FAM83D	CBFB	HES1	MPHOSPH6	FOXRED1	NA	NA	SSRP1	NA	SHISA2	NA	NA	NA	NA	NA
FANCA	CBL	HEY1	MPP5	FOXRED2	NA	NA	STIL	NA	SHROOM3	NA	NA	NA	NA	NA
FANCB	CBLL1	HIPK2	MPZL1	FRZB	NA	NA	STMN1	NA	SKP2	NA	NA	NA	NA	NA
FANCC	CBR1	HIST1H2BN	MTHFD2	FSD1	NA	NA	TACC3	NA	SLC16A1	NA	NA	NA	NA	NA
FANCD2	CBX3	HIST1H4C	MYBL1	FST	NA	NA	TBL1X	NA	SLC25A32	NA	NA	NA	NA	NA
FANCE	CBX5	HJURP	MYO10	GABRE	NA	NA	TCERG1	NA	SLC30A1	NA	NA	NA	NA	NA
FANCG	CC2D2A	HMGA2	MYOCD	GALNT12	NA	NA	TCF19	NA	SLC31A1	NA	NA	NA	NA	NA
FANCI	CCAR1	HMGB1	NCALD	GAS2L3	NA	NA	TCP1	NA	SLC38A1	NA	NA	NA	NA	NA
FANCL	CCDC117	HMGB2	NCEH1	GATA2	NA	NA	TDP1	NA	SLC7A1	NA	NA	NA	NA	NA
FASN	CCDC134	HNRNPA0	NCOA1	GCNT1	NA	NA	TIA1	NA	SLC7A2	NA	NA	NA	NA	NA
FAT3	CCDC137	HNRNPAB	NDEL1	GDAP1	NA	NA	TIPIN	NA	SLC7A6	NA	NA	NA	NA	NA
FBL	CCDC138	HNRNPD	NEDD4L	GEMIN4	NA	NA	TJP2	NA	SMC1A	NA	NA	NA	NA	NA
FDXACB1	CCDC14	HNRNPR	NEDD9	GEMIN5	NA	NA	TLE3	NA	SNRPD1	NA	NA	NA	NA	NA
FEN1	CCDC15	HOXC8	NES	GEN1	NA	NA	TMEM220	NA	SON	NA	NA	NA	NA	NA
FGFRL1	CCDC150	HP1BP3	NFATC2IP	GGA2	NA	NA	TMPO	NA	SPAG1	NA	NA	NA	NA	NA
FKBP4	CCDC18	HSPA8	NFIC	GIN1	NA	NA	TOP1	NA	SPTLC2	NA	NA	NA	NA	NA
FLOT1	CCDC34	HSPH1	NMNAT2	GINS1	NA	NA	TPX2	NA	SRP19	NA	NA	NA	NA	NA
FLRT3	CCDC58	ICAM1	NOG	GINS2	NA	NA	TRA2B	NA	SRPRB	NA	NA	NA	NA	NA
FLVCR1	CCDC59	ID1	NOL10	GINS3	NA	NA	TRIP13	NA	SRRM2	NA	NA	NA	NA	NA
FOXM1	CCDC66	ID4	NR1D2	GLB1L	NA	NA	TSEN15	NA	SRSF1	NA	NA	NA	NA	NA
FOXRED1	CCDC77	IGFBP3	NR3C1	GLI3	NA	NA	TTK	NA	SRSF2	NA	NA	NA	NA	NA
FOXRED2	CCDC86	IL6	NRG1	GMEB1	NA	NA	TULP3	NA	SRSF6	NA	NA	NA	NA	NA
FRZB	CCDC89	IL7R	NSUN2	GMNN	NA	NA	TXNRD1	NA	SRSF7	NA	NA	NA	NA	NA
FSD1	CCDC97	ILF3	NT5E	GNE	NA	NA	TYMS	NA	SSTR1	NA	NA	NA	NA	NA
FST	CCHCR1	ING2	NTM	GOLM1	NA	NA	UBE2T	NA	ST3GAL1	NA	NA	NA	NA	NA
GABRE	CCNA2	INHBB	NUFIP2	GPATCH4	NA	NA	UHRF1	NA	STIL	NA	NA	NA	NA	NA
GALNT12	CCNB1	INSR	NUP160	GPC5	NA	NA	USP13	NA	SYNCRIP	NA	NA	NA	NA	NA
GAS2L3	CCNB2	IPPK	NUP43	GPC6	NA	NA	WDR4	NA	TAF13	NA	NA	NA	NA	NA
GATA2	CCNE2	IRX5	NUP88	GPHN	NA	NA	WDR76	NA	TBL1X	NA	NA	NA	NA	NA
GATAD2B	CCNF	ITGB3BP	ODC1	GPM6B	NA	NA	WWC1	NA	TBRG1	NA	NA	NA	NA	NA
GCA	CCNI	IYD	ORC1	GPR87	NA	NA	ZNF367	NA	TCERG1	NA	NA	NA	NA	NA
[truncated: 2,245 more rows]

## Sheet: GSE59861_24h_GSE55118
X1_sets_GSE55118_middle_vs_young	X1_sets_GSE55118_old_vs_young	X1_sets_GSE59861_24h_2Gy	X1_sets_GSE59861_24h_5cGy	X2_sets_GSE55118_middle_vs_young_GSE55118_old_vs_young	X2_sets_GSE55118_middle_vs_young_GSE59861_24h_2Gy	X2_sets_GSE55118_middle_vs_young_GSE59861_24h_5cGy	X2_sets_GSE55118_old_vs_young_GSE59861_24h_2Gy	X2_sets_GSE55118_old_vs_young_GSE59861_24h_5cGy	X2_sets_GSE59861_24h_2Gy_GSE59861_24h_5cGy	X3_sets_GSE55118_middle_vs_young_GSE55118_old_vs_young_GSE59861_24h_2Gy	X3_sets_GSE55118_middle_vs_young_GSE55118_old_vs_young_GSE59861_24h_5cGy	X3_sets_GSE55118_middle_vs_young_GSE59861_24h_2Gy_GSE59861_24h_5cGy	X3_sets_GSE55118_old_vs_young_GSE59861_24h_2Gy_GSE59861_24h_5cGy	X4_sets_GSE55118_middle_vs_young_GSE55118_old_vs_young_GSE59861_24h_2Gy_GSE59861_24h_5cGy
[truncated: 619 more rows]
