# Supplementary material for: Replicative and radiation-induced aging: a comparison of gene expression profiles
Source: Aging (Albany NY). 2019 Apr 19;11(8):2378–87. doi: 10.18632/aging.101921 (PMC6520014; doi:10.18632/aging.101921)
Supplement: Supplemental Table S5 [file aging-11-101921-s005.xlsx]

## Sheet: GSE59861_3h_EMTAB2086
X1_sets_EMTAB2086_70_vs_30	X1_sets_EMTAB2086_80_vs_30	X1_sets_GSE59861_3h_2Gy	X1_sets_GSE59861_3h_5cGy	X2_sets_EMTAB2086_70_vs_30_EMTAB2086_80_vs_30	X2_sets_EMTAB2086_70_vs_30_GSE59861_3h_2Gy	X2_sets_EMTAB2086_70_vs_30_GSE59861_3h_5cGy	X2_sets_EMTAB2086_80_vs_30_GSE59861_3h_2Gy	X2_sets_EMTAB2086_80_vs_30_GSE59861_3h_5cGy	X2_sets_GSE59861_3h_2Gy_GSE59861_3h_5cGy	X3_sets_EMTAB2086_70_vs_30_EMTAB2086_80_vs_30_GSE59861_3h_2Gy	X3_sets_EMTAB2086_70_vs_30_EMTAB2086_80_vs_30_GSE59861_3h_5cGy	X3_sets_EMTAB2086_70_vs_30_GSE59861_3h_2Gy_GSE59861_3h_5cGy	X3_sets_EMTAB2086_80_vs_30_GSE59861_3h_2Gy_GSE59861_3h_5cGy	X4_sets_EMTAB2086_70_vs_30_EMTAB2086_80_vs_30_GSE59861_3h_2Gy_GSE59861_3h_5cGy
ABCA2	A2M	ABCB5	ADAMTSL1	ABCA2	BTG2	GDF15	AHCYL2	CXADR	FGF22	BTG2	GDF15	GDF15	GDF15	GDF15
ABCB1	ABAT	ABR	ASXL1	ABCB1	CDKN1A	NA	BTG2	GDF15	GDF15	CDKN1A	NA	NA	PHLDB1	NA
ABL2	ABCA12	ADAM28	CXADR	ABL2	COG6	NA	CCDC113	PHLDB1	PHLDB1	COG6	NA	NA	NA	NA
ACTBL2	ABCA2	ADAMTS19	CYP4F3	ACTBL2	EDEM3	NA	CDKN1A	SASH1	SMARCE1	EDEM3	NA	NA	NA	NA
ACTR10	ABCA3	ADH1C	DDX17	ACTR10	EPHA2	NA	CES4A	SLFN5	SPERT	EPHA2	NA	NA	NA	NA
ACYP2	ABCA4	AEN	ELF2	ACYP2	FAM43A	NA	COG6	TMC6	SUSD5	FAM43A	NA	NA	NA	NA
ADAM19	ABCA7	AHCYL2	FGF22	ADAM19	GADD45A	NA	DCUN1D3	NA	NA	GADD45A	NA	NA	NA	NA
ADAMTS12	ABCB1	AKAP13	GDF15	ADAMTS12	GDF15	NA	EDEM3	NA	NA	GDF15	NA	NA	NA	NA
ADAMTSL5	ABCD1	AKT2	HBD	ADAMTSL5	MCTP2	NA	EPB41L1	NA	NA	MCTP2	NA	NA	NA	NA
ADD3	ABHD12	ALAS2	HECTD2	AGRN	NIPAL2	NA	EPHA2	NA	NA	NIPAL2	NA	NA	NA	NA
AGRN	ABL2	ALDOB	HIPK2	AHNAK2	PCDHB9	NA	FAM43A	NA	NA	PCDHB9	NA	NA	NA	NA
AHNAK2	ABLIM1	ALOXE3	HLA-DPB2	AIG1	PDLIM5	NA	GADD45A	NA	NA	PDLIM5	NA	NA	NA	NA
AIG1	ABLIM3	ARHGEF3	ITGA5	ANGPT1	PSG1	NA	GDF15	NA	NA	PSG1	NA	NA	NA	NA
ANGPT1	ABTB2	ASB10	NES	ANGPTL4	RASGRP1	NA	HNF4A	NA	NA	RASGRP1	NA	NA	NA	NA
ANGPTL4	ACAA1	ATF3	PHLDB1	ANKH	RGS5	NA	KRT17	NA	NA	RGS5	NA	NA	NA	NA
ANKH	ACER1	ATN1	PLXNB2	ANKRA2	SESN1	NA	MCTP2	NA	NA	SESN1	NA	NA	NA	NA
ANKRA2	ACER2	ATP2C2	PPIL2	ANKRD1	SESN2	NA	NIPAL2	NA	NA	TMEM217	NA	NA	NA	NA
ANKRD1	ACOX1	ATP6V0E2	RPH3AL	ANKRD42	TMEM217	NA	OSM	NA	NA	TOB1	NA	NA	NA	NA
ANKRD42	ACSL5	AUP1	SASH1	ANKRD44	TOB1	NA	PCDHB9	NA	NA	NA	NA	NA	NA	NA
ANKRD44	ACTBL2	BAIAP2	SFSWAP	ANO10	ZFC3H1	NA	PDLIM5	NA	NA	NA	NA	NA	NA	NA
ANO10	ACTR10	BBC3	SLFN5	ANXA4	NA	NA	PHLDB1	NA	NA	NA	NA	NA	NA	NA
ANO6	ACVR2A	BTG2	SMARCE1	APBB2	NA	NA	PLXNB3	NA	NA	NA	NA	NA	NA	NA
ANXA4	ACYP2	C15ORF56	SPATA2	ARHGAP26	NA	NA	POLH	NA	NA	NA	NA	NA	NA	NA
APBB2	ADAM12	C18ORF12	SPEN	ARHGAP31	NA	NA	PSG1	NA	NA	NA	NA	NA	NA	NA
ARHGAP10	ADAM19	CA9	SPERT	ARHGAP5	NA	NA	RASGRP1	NA	NA	NA	NA	NA	NA	NA
ARHGAP26	ADAM23	CCDC113	SUSD5	ARRDC1	NA	NA	RGS5	NA	NA	NA	NA	NA	NA	NA
ARHGAP31	ADAM32	CCL20	TCF7L2	ARSK	NA	NA	SESN1	NA	NA	NA	NA	NA	NA	NA
ARHGAP5	ADAMTS12	CD93	TMC6	ASAH1	NA	NA	SLC38A7	NA	NA	NA	NA	NA	NA	NA
ARRDC1	ADAMTS13	CDKN1A	TOMM40L	ASAP2	NA	NA	TAOK2	NA	NA	NA	NA	NA	NA	NA
ARSK	ADAMTSL4	CELA1	TRIO	ASCC3	NA	NA	TMEM217	NA	NA	NA	NA	NA	NA	NA
ASAH1	ADAMTSL5	CENPI	USP29	ATP10A	NA	NA	TOB1	NA	NA	NA	NA	NA	NA	NA
ASAP2	ADCK2	CEP78	NA	ATP11A	NA	NA	NA	NA	NA	NA	NA	NA	NA	NA
ASCC3	ADCY6	CES4A	NA	ATP13A2	NA	NA	NA	NA	NA	NA	NA	NA	NA	NA
ATP10A	ADHFE1	CIDEB	NA	ATP6AP2	NA	NA	NA	NA	NA	NA	NA	NA	NA	NA
ATP11A	ADIPOR1	CNTFR	NA	ATP6V0A1	NA	NA	NA	NA	NA	NA	NA	NA	NA	NA
ATP13A2	ADRA2C	COG6	NA	ATP9A	NA	NA	NA	NA	NA	NA	NA	NA	NA	NA
ATP6AP2	ADRB2	CPNE4	NA	B4GALNT1	NA	NA	NA	NA	NA	NA	NA	NA	NA	NA
ATP6V0A1	AES	CPSF1	NA	BACH1	NA	NA	NA	NA	NA	NA	NA	NA	NA	NA
ATP9A	AFAP1	CRHR2	NA	BAIAP2L1	NA	NA	NA	NA	NA	NA	NA	NA	NA	NA
B2M	AFF1	CRISPLD2	NA	BANK1	NA	NA	NA	NA	NA	NA	NA	NA	NA	NA
B4GALNT1	AGRN	DAPK1	NA	BBS2	NA	NA	NA	NA	NA	NA	NA	NA	NA	NA
BAALC	AGXT	DAPK2	NA	BCL2L1	NA	NA	NA	NA	NA	NA	NA	NA	NA	NA
BACH1	AHCYL2	DCST1	NA	BHLHE40	NA	NA	NA	NA	NA	NA	NA	NA	NA	NA
BAIAP2L1	AHNAK2	DCUN1D3	NA	BLCAP	NA	NA	NA	NA	NA	NA	NA	NA	NA	NA
BANK1	AIG1	DMRT3	NA	BLOC1S2	NA	NA	NA	NA	NA	NA	NA	NA	NA	NA
BAX	AK4	DPPA4	NA	BLZF1	NA	NA	NA	NA	NA	NA	NA	NA	NA	NA
BBS2	AKAP6	DSG1	NA	BPGM	NA	NA	NA	NA	NA	NA	NA	NA	NA	NA
BBS9	ALDH5A1	EDEM3	NA	BTG2	NA	NA	NA	NA	NA	NA	NA	NA	NA	NA
BCL2L1	ALDOAP2	EFNB3	NA	BTN2A2	NA	NA	NA	NA	NA	NA	NA	NA	NA	NA
BHLHE40	ALKBH6	ELAVL1	NA	BTRC	NA	NA	NA	NA	NA	NA	NA	NA	NA	NA
BIRC3	ALPK2	ELMOD3	NA	C14ORF28	NA	NA	NA	NA	NA	NA	NA	NA	NA	NA
BLCAP	ALS2CL	EPB41L1	NA	C1ORF54	NA	NA	NA	NA	NA	NA	NA	NA	NA	NA
BLOC1S2	AMIGO1	EPB41L4B	NA	C3ORF35	NA	NA	NA	NA	NA	NA	NA	NA	NA	NA
BLZF1	AMIGO2	EPHA2	NA	C3ORF52	NA	NA	NA	NA	NA	NA	NA	NA	NA	NA
BPGM	AMPD1	ERG	NA	C4ORF3	NA	NA	NA	NA	NA	NA	NA	NA	NA	NA
BTBD3	AMPD3	FAM43A	NA	C4ORF36	NA	NA	NA	NA	NA	NA	NA	NA	NA	NA
BTG2	AMZ1	FBXO44	NA	C5AR1	NA	NA	NA	NA	NA	NA	NA	NA	NA	NA
BTN2A2	ANGPT1	FGF22	NA	C5ORF15	NA	NA	NA	NA	NA	NA	NA	NA	NA	NA
BTRC	ANGPTL4	FXN	NA	C5ORF46	NA	NA	NA	NA	NA	NA	NA	NA	NA	NA
C14ORF28	ANK1	GADD45A	NA	C7	NA	NA	NA	NA	NA	NA	NA	NA	NA	NA
C16ORF72	ANK2	GCK	NA	CACNA2D1	NA	NA	NA	NA	NA	NA	NA	NA	NA	NA
C1ORF54	ANKH	GDF15	NA	CADM3	NA	NA	NA	NA	NA	NA	NA	NA	NA	NA
C2CD2	ANKRA2	HEXA	NA	CALCOCO1	NA	NA	NA	NA	NA	NA	NA	NA	NA	NA
C3ORF35	ANKRD1	HIC1	NA	CALD1	NA	NA	NA	NA	NA	NA	NA	NA	NA	NA
C3ORF52	ANKRD29	HNF4A	NA	CAMTA2	NA	NA	NA	NA	NA	NA	NA	NA	NA	NA
C4ORF3	ANKRD37	HNMT	NA	CAP2	NA	NA	NA	NA	NA	NA	NA	NA	NA	NA
C4ORF36	ANKRD42	HSF5	NA	CASS4	NA	NA	NA	NA	NA	NA	NA	NA	NA	NA
C5AR1	ANKRD44	ICK	NA	CCDC81	NA	NA	NA	NA	NA	NA	NA	NA	NA	NA
C5ORF15	ANKRD46	IER5	NA	CCIN	NA	NA	NA	NA	NA	NA	NA	NA	NA	NA
C5ORF46	ANKRD52	IGF1	NA	CCL2	NA	NA	NA	NA	NA	NA	NA	NA	NA	NA
C7	ANKS1B	IGSF6	NA	CCND1	NA	NA	NA	NA	NA	NA	NA	NA	NA	NA
CACNA2D1	ANO10	IL17RE	NA	CCND2	NA	NA	NA	NA	NA	NA	NA	NA	NA	NA
CADM3	ANTXR1	IL2RG	NA	CD109	NA	NA	NA	NA	NA	NA	NA	NA	NA	NA
CALCOCO1	ANXA4	KCNJ3	NA	CD46	NA	NA	NA	NA	NA	NA	NA	NA	NA	NA
CALD1	ANXA6	KCNN1	NA	CD63	NA	NA	NA	NA	NA	NA	NA	NA	NA	NA
CAMTA2	APBB2	KLK12	NA	CD9	NA	NA	NA	NA	NA	NA	NA	NA	NA	NA
CAP2	APH1B	KLK2	NA	CDH13	NA	NA	NA	NA	NA	NA	NA	NA	NA	NA
CASS4	APLP1	KLK3	NA	CDK6	NA	NA	NA	NA	NA	NA	NA	NA	NA	NA
CCDC81	APOD	KPNA7	NA	CDKN1A	NA	NA	NA	NA	NA	NA	NA	NA	NA	NA
CCIN	AQP4	KRT13	NA	CDKN2B	NA	NA	NA	NA	NA	NA	NA	NA	NA	NA
CCL2	AR	KRT17	NA	CDYL2	NA	NA	NA	NA	NA	NA	NA	NA	NA	NA
CCND1	AREG	KRT36	NA	CENPT	NA	NA	NA	NA	NA	NA	NA	NA	NA	NA
CCND2	ARHGAP24	KRT40	NA	CERCAM	NA	NA	NA	NA	NA	NA	NA	NA	NA	NA
CD109	ARHGAP26	KRTAP10-9	NA	CFL2	NA	NA	NA	NA	NA	NA	NA	NA	NA	NA
CD46	ARHGAP29	KRTAP5-2	NA	CFLAR	NA	NA	NA	NA	NA	NA	NA	NA	NA	NA
CD63	ARHGAP31	KRTAP5-5	NA	CHIC2	NA	NA	NA	NA	NA	NA	NA	NA	NA	NA
CD82	ARHGAP5	L3MBTL4	NA	CHPF	NA	NA	NA	NA	NA	NA	NA	NA	NA	NA
CD9	ARHGAP9	LCA5L	NA	CHRNA1	NA	NA	NA	NA	NA	NA	NA	NA	NA	NA
CDC42EP3	ARHGDIB	LCE1E	NA	CHST11	NA	NA	NA	NA	NA	NA	NA	NA	NA	NA
CDH13	ARHGEF37	LILRA2	NA	CITED2	NA	NA	NA	NA	NA	NA	NA	NA	NA	NA
CDK6	ARHGEF4	MAP3K14	NA	CLDN1	NA	NA	NA	NA	NA	NA	NA	NA	NA	NA
CDKN1A	ARL6IP5	MAPK4	NA	CLDN16	NA	NA	NA	NA	NA	NA	NA	NA	NA	NA
CDKN2B	ARMCX3	MCTP2	NA	CLN5	NA	NA	NA	NA	NA	NA	NA	NA	NA	NA
CDYL2	ARRDC1	MICAL3	NA	CLN8	NA	NA	NA	NA	NA	NA	NA	NA	NA	NA
CENPT	ARRDC4	MST1R	NA	CLTB	NA	NA	NA	NA	NA	NA	NA	NA	NA	NA
CERCAM	ARSA	MTA1	NA	CMBL	NA	NA	NA	NA	NA	NA	NA	NA	NA	NA
CFH	ARSD	MYO1G	NA	CMIP	NA	NA	NA	NA	NA	NA	NA	NA	NA	NA
CFL2	ARSG	NDST3	NA	CMPK1	NA	NA	NA	NA	NA	NA	NA	NA	NA	NA
CFLAR	ARSK	NINJ2	NA	CNIH3	NA	NA	NA	NA	NA	NA	NA	NA	NA	NA
CHAC1	ARV1	NIPAL2	NA	CNNM1	NA	NA	NA	NA	NA	NA	NA	NA	NA	NA
CHIC2	ASAH1	NOS3	NA	COBLL1	NA	NA	NA	NA	NA	NA	NA	NA	NA	NA
CHPF	ASAP2	NTHL1	NA	COG6	NA	NA	NA	NA	NA	NA	NA	NA	NA	NA
CHRNA1	ASB16	NUDCD3	NA	COL11A1	NA	NA	NA	NA	NA	NA	NA	NA	NA	NA
CHST11	ASCC3	OR13C9	NA	COL8A1	NA	NA	NA	NA	NA	NA	NA	NA	NA	NA
CHST7	ASL	OR1A2	NA	COPZ2	NA	NA	NA	NA	NA	NA	NA	NA	NA	NA
CITED2	ATAD1	OR1L3	NA	COQ10B	NA	NA	NA	NA	NA	NA	NA	NA	NA	NA
CLDN1	ATG4A	OR2G2	NA	CPEB2	NA	NA	NA	NA	NA	NA	NA	NA	NA	NA
CLDN12	ATL1	OSM	NA	CPEB4	NA	NA	NA	NA	NA	NA	NA	NA	NA	NA
CLDN16	ATL3	OTUD7B	NA	CPPED1	NA	NA	NA	NA	NA	NA	NA	NA	NA	NA
CLN5	ATOX1	PCDHA5	NA	CREB3	NA	NA	NA	NA	NA	NA	NA	NA	NA	NA
CLN8	ATP10A	PCDHB9	NA	CSGALNACT2	NA	NA	NA	NA	NA	NA	NA	NA	NA	NA
CLTB	ATP10D	PCP4L1	NA	CST3	NA	NA	NA	NA	NA	NA	NA	NA	NA	NA
CMBL	ATP11A	PDLIM5	NA	CTBS	NA	NA	NA	NA	NA	NA	NA	NA	NA	NA
CMIP	ATP13A2	PDZD11	NA	CTGF	NA	NA	NA	NA	NA	NA	NA	NA	NA	NA
CMPK1	ATP2B4	PHLDB1	NA	CTSO	NA	NA	NA	NA	NA	NA	NA	NA	NA	NA
CNIH3	ATP2C1	PIK3CG	NA	CTSZ	NA	NA	NA	NA	NA	NA	NA	NA	NA	NA
CNNM1	ATP6AP1	PIK3R3	NA	CXCL10	NA	NA	NA	NA	NA	NA	NA	NA	NA	NA
CNST	ATP6AP2	PIP	NA	CYB5R1	NA	NA	NA	NA	NA	NA	NA	NA	NA	NA
CNTN3	ATP6V0A1	PITPNM2	NA	CYBA	NA	NA	NA	NA	NA	NA	NA	NA	NA	NA
COBLL1	ATP6V0A4	PIWIL2	NA	CYBRD1	NA	NA	NA	NA	NA	NA	NA	NA	NA	NA
COG5	ATP6V0E1	PKLR	NA	CYFIP2	NA	NA	NA	NA	NA	NA	NA	NA	NA	NA
COG6	ATP6V1E1	PLXNB3	NA	CYP2U1	NA	NA	NA	NA	NA	NA	NA	NA	NA	NA
COL11A1	ATP6V1G1	POLH	NA	CYR61	NA	NA	NA	NA	NA	NA	NA	NA	NA	NA
COL6A1	ATP7B	POM121L2	NA	DAP	NA	NA	NA	NA	NA	NA	NA	NA	NA	NA
COL8A1	ATP9A	PPM1D	NA	DDR2	NA	NA	NA	NA	NA	NA	NA	NA	NA	NA
COPZ2	ATRN	PPP1R1C	NA	DDX58	NA	NA	NA	NA	NA	NA	NA	NA	NA	NA
COQ10B	ATRNL1	PRKCG	NA	DGKA	NA	NA	NA	NA	NA	NA	NA	NA	NA	NA
CPEB2	B3GAT2	PRMT8	NA	DGKI	NA	NA	NA	NA	NA	NA	NA	NA	NA	NA
CPEB4	B3GAT3	PSG1	NA	DHRS7	NA	NA	NA	NA	NA	NA	NA	NA	NA	NA
CPPED1	B3GNT4	PSTK	NA	DMD	NA	NA	NA	NA	NA	NA	NA	NA	NA	NA
CREB3	B3GNT9	RAP2B	NA	DMPK	NA	NA	NA	NA	NA	NA	NA	NA	NA	NA
CSGALNACT2	B4GALNT1	RAPGEFL1	NA	DNAJB4	NA	NA	NA	NA	NA	NA	NA	NA	NA	NA
CST3	B4GALT1	RASGRP1	NA	DNAJB9	NA	NA	NA	NA	NA	NA	NA	NA	NA	NA
CTAGE1	B4GALT7	RECQL5	NA	DNAJC6	NA	NA	NA	NA	NA	NA	NA	NA	NA	NA
CTBS	BACH1	REEP1	NA	DNASE1L1	NA	NA	NA	NA	NA	NA	NA	NA	NA	NA
CTGF	BAD	RGS5	NA	DOCK9	NA	NA	NA	NA	NA	NA	NA	NA	NA	NA
CTHRC1	BAIAP2L1	RRP1B	NA	DOK1	NA	NA	NA	NA	NA	NA	NA	NA	NA	NA
CTSK	BANK1	RTKN	NA	DRAM1	NA	NA	NA	NA	NA	NA	NA	NA	NA	NA
CTSO	BBS2	SDHA	NA	DRP2	NA	NA	NA	NA	NA	NA	NA	NA	NA	NA
CTSZ	BCAS3	SESN1	NA	DSP	NA	NA	NA	NA	NA	NA	NA	NA	NA	NA
CXCL10	BCL2L1	SESN2	NA	DUSP3	NA	NA	NA	NA	NA	NA	NA	NA	NA	NA
CYB5R1	BHLHE40	SHKBP1	NA	DUSP6	NA	NA	NA	NA	NA	NA	NA	NA	NA	NA
CYBA	BLCAP	SLC22A7	NA	DYNLT3	NA	NA	NA	NA	NA	NA	NA	NA	NA	NA
CYBRD1	BLOC1S2	SLC30A8	NA	EBI3	NA	NA	NA	NA	NA	NA	NA	NA	NA	NA
CYFIP2	BLZF1	SLC36A2	NA	ECM1	NA	NA	NA	NA	NA	NA	NA	NA	NA	NA
CYLD	BMP1	SLC38A7	NA	EDA2R	NA	NA	NA	NA	NA	NA	NA	NA	NA	NA
CYP2U1	BMP2	SMARCE1	NA	EDEM3	NA	NA	NA	NA	NA	NA	NA	NA	NA	NA
CYR61	BMP6	SMG6	NA	EDIL3	NA	NA	NA	NA	NA	NA	NA	NA	NA	NA
DAP	BMPER	SNX18	NA	EDN1	NA	NA	NA	NA	NA	NA	NA	NA	NA	NA
DDR2	BPGM	SOBP	NA	EGR2	NA	NA	NA	NA	NA	NA	NA	NA	NA	NA
DDX58	BSDC1	SOX2	NA	ELFN1	NA	NA	NA	NA	NA	NA	NA	NA	NA	NA
DGKA	BTBD1	SPAG6	NA	ENC1	NA	NA	NA	NA	NA	NA	NA	NA	NA	NA
DGKI	BTBD9	SPDEF	NA	EPHA2	NA	NA	NA	NA	NA	NA	NA	NA	NA	NA
DHRS7	BTG2	SPERT	NA	EPHX4	NA	NA	NA	NA	NA	NA	NA	NA	NA	NA
DMD	BTN2A2	SPN	NA	EPS8L2	NA	NA	NA	NA	NA	NA	NA	NA	NA	NA
DMPK	BTRC	SPRR2F	NA	ERLEC1	NA	NA	NA	NA	NA	NA	NA	NA	NA	NA
DNAJB4	C11ORF87	SSH1	NA	ERP44	NA	NA	NA	NA	NA	NA	NA	NA	NA	NA
DNAJB9	C12ORF57	SUSD5	NA	ERRFI1	NA	NA	NA	NA	NA	NA	NA	NA	NA	NA
DNAJC28	C14ORF28	SYN2	NA	ETHE1	NA	NA	NA	NA	NA	NA	NA	NA	NA	NA
DNAJC6	C16ORF74	SYT8	NA	ETNK2	NA	NA	NA	NA	NA	NA	NA	NA	NA	NA
DNASE1L1	C19ORF18	TAOK2	NA	ETV5	NA	NA	NA	NA	NA	NA	NA	NA	NA	NA
DOCK9	C1ORF53	TBXAS1	NA	EVI5	NA	NA	NA	NA	NA	NA	NA	NA	NA	NA
DOK1	C1ORF54	THPO	NA	EXPH5	NA	NA	NA	NA	NA	NA	NA	NA	NA	NA
DRAM1	C1QTNF7	TMC5	NA	EXTL1	NA	NA	NA	NA	NA	NA	NA	NA	NA	NA
DRP2	C20ORF194	TMEM126B	NA	F3	NA	NA	NA	NA	NA	NA	NA	NA	NA	NA
DSP	C21ORF62	TMEM161B	NA	FABP3	NA	NA	NA	NA	NA	NA	NA	NA	NA	NA
DUSP14	C2ORF66	TMEM217	NA	FADS3	NA	NA	NA	NA	NA	NA	NA	NA	NA	NA
DUSP3	C3	TMEM45B	NA	FAM151B	NA	NA	NA	NA	NA	NA	NA	NA	NA	NA
DUSP6	C3ORF35	TOB1	NA	FAM174A	NA	NA	NA	NA	NA	NA	NA	NA	NA	NA
DUSP8	C3ORF52	TRDMT1	NA	FAM43A	NA	NA	NA	NA	NA	NA	NA	NA	NA	NA
DYNLT3	C3ORF70	TRPC5	NA	FAP	NA	NA	NA	NA	NA	NA	NA	NA	NA	NA
EBF3	C4ORF3	TTC21A	NA	FAR2	NA	NA	NA	NA	NA	NA	NA	NA	NA	NA
EBI3	C4ORF36	UGT3A2	NA	FAS	NA	NA	NA	NA	NA	NA	NA	NA	NA	NA
ECM1	C5AR1	VWA2	NA	FBN1	NA	NA	NA	NA	NA	NA	NA	NA	NA	NA
EDA2R	C5ORF15	WFDC3	NA	FBN2	NA	NA	NA	NA	NA	NA	NA	NA	NA	NA
EDEM3	C5ORF46	XIRP1	NA	FBXL2	NA	NA	NA	NA	NA	NA	NA	NA	NA	NA
EDIL3	C6ORF222	ZFAT	NA	FCGRT	NA	NA	NA	NA	NA	NA	NA	NA	NA	NA
EDN1	C7	ZFC3H1	NA	FCHSD2	NA	NA	NA	NA	NA	NA	NA	NA	NA	NA
EFNB2	C8ORF34	ZNF638	NA	FER1L4	NA	NA	NA	NA	NA	NA	NA	NA	NA	NA
EGR2	C9ORF131	ZNF692	NA	FGD4	NA	NA	NA	NA	NA	NA	NA	NA	NA	NA
ELFN1	C9ORF170	ZNRF4	NA	FHOD3	NA	NA	NA	NA	NA	NA	NA	NA	NA	NA
ENC1	CACNA1C	NA	NA	FLT1	NA	NA	NA	NA	NA	NA	NA	NA	NA	NA
EPHA2	CACNA2D1	NA	NA	FMN1	NA	NA	NA	NA	NA	NA	NA	NA	NA	NA
EPHX4	CACNA2D3	NA	NA	FMOD	NA	NA	NA	NA	NA	NA	NA	NA	NA	NA
EPRS	CACNG6	NA	NA	FNDC3B	NA	NA	NA	NA	NA	NA	NA	NA	NA	NA
EPS8L2	CADM3	NA	NA	FNDC4	NA	NA	NA	NA	NA	NA	NA	NA	NA	NA
ERAP2	CALCA	NA	NA	FOXE1	NA	NA	NA	NA	NA	NA	NA	NA	NA	NA
ERLEC1	CALCOCO1	NA	NA	FRMD6	NA	NA	NA	NA	NA	NA	NA	NA	NA	NA
ERP44	CALCOCO2	NA	NA	FRY	NA	NA	NA	NA	NA	NA	NA	NA	NA	NA
ERRFI1	CALD1	NA	NA	FSTL3	NA	NA	NA	NA	NA	NA	NA	NA	NA	NA
ETHE1	CAMK1D	NA	NA	FZD6	NA	NA	NA	NA	NA	NA	NA	NA	NA	NA
ETNK2	CAMLG	NA	NA	GADD45A	NA	NA	NA	NA	NA	NA	NA	NA	NA	NA
ETV5	CAMP	NA	NA	GALNT10	NA	NA	NA	NA	NA	NA	NA	NA	NA	NA
EVI5	CAMTA2	NA	NA	GALNT5	NA	NA	NA	NA	NA	NA	NA	NA	NA	NA
EXPH5	CAP2	NA	NA	GAS6	NA	NA	NA	NA	NA	NA	NA	NA	NA	NA
EXTL1	CAPN6	NA	NA	GATA3	NA	NA	NA	NA	NA	NA	NA	NA	NA	NA
F3	CAPNS2	NA	NA	GBE1	NA	NA	NA	NA	NA	NA	NA	NA	NA	NA
FABP3	CAPS	NA	NA	GCNT2	NA	NA	NA	NA	NA	NA	NA	NA	NA	NA
FADS3	CASS4	NA	NA	GCNT4	NA	NA	NA	NA	NA	NA	NA	NA	NA	NA
FAM151B	CATSPERG	NA	NA	GDF15	NA	NA	NA	NA	NA	NA	NA	NA	NA	NA
FAM174A	CBLN3	NA	NA	GDF6	NA	NA	NA	NA	NA	NA	NA	NA	NA	NA
FAM43A	CCDC113	NA	NA	GDPD1	NA	NA	NA	NA	NA	NA	NA	NA	NA	NA
FAP	CCDC153	NA	NA	GFPT1	NA	NA	NA	NA	NA	NA	NA	NA	NA	NA
FAR2	CCDC50	NA	NA	GIPC1	NA	NA	NA	NA	NA	NA	NA	NA	NA	NA
FAS	CCDC68	NA	NA	GK5	NA	NA	NA	NA	NA	NA	NA	NA	NA	NA
FBLIM1	CCDC69	NA	NA	GOLGB1	NA	NA	NA	NA	NA	NA	NA	NA	NA	NA
FBN1	CCDC80	NA	NA	GPR108	NA	NA	NA	NA	NA	NA	NA	NA	NA	NA
FBN2	CCDC81	NA	NA	GPR137B	NA	NA	NA	NA	NA	NA	NA	NA	NA	NA
FBXL2	CCDC90B	NA	NA	GPR155	NA	NA	NA	NA	NA	NA	NA	NA	NA	NA
FCGRT	CCIN	NA	NA	GRAMD1B	NA	NA	NA	NA	NA	NA	NA	NA	NA	NA
FCHSD2	CCL2	NA	NA	GSN	NA	NA	NA	NA	NA	NA	NA	NA	NA	NA
FER1L4	CCL28	NA	NA	GSTM3	NA	NA	NA	NA	NA	NA	NA	NA	NA	NA
FGD4	CCND1	NA	NA	GSTO1	NA	NA	NA	NA	NA	NA	NA	NA	NA	NA
FGF1	CCND2	NA	NA	GYS1	NA	NA	NA	NA	NA	NA	NA	NA	NA	NA
FHOD3	CCNDBP1	NA	NA	H6PD	NA	NA	NA	NA	NA	NA	NA	NA	NA	NA
FLT1	CD109	NA	NA	HCN2	NA	NA	NA	NA	NA	NA	NA	NA	NA	NA
FMN1	CD14	NA	NA	HDAC9	NA	NA	NA	NA	NA	NA	NA	NA	NA	NA
FMOD	CD151	NA	NA	HEATR5A	NA	NA	NA	NA	NA	NA	NA	NA	NA	NA
FNDC3B	CD163L1	NA	NA	HECW1	NA	NA	NA	NA	NA	NA	NA	NA	NA	NA
FNDC4	CD46	NA	NA	HECW2	NA	NA	NA	NA	NA	NA	NA	NA	NA	NA
FNIP2	CD55	NA	NA	HEXB	NA	NA	NA	NA	NA	NA	NA	NA	NA	NA
FOXC1	CD58	NA	NA	HHAT	NA	NA	NA	NA	NA	NA	NA	NA	NA	NA
FOXE1	CD59	NA	NA	HINT3	NA	NA	NA	NA	NA	NA	NA	NA	NA	NA
FRMD6	CD63	NA	NA	HIST1H2BK	NA	NA	NA	NA	NA	NA	NA	NA	NA	NA
FRS2	CD9	NA	NA	HIVEP1	NA	NA	NA	NA	NA	NA	NA	NA	NA	NA
FRY	CDC42BPB	NA	NA	HIVEP2	NA	NA	NA	NA	NA	NA	NA	NA	NA	NA
FSTL3	CDCP1	NA	NA	HK2	NA	NA	NA	NA	NA	NA	NA	NA	NA	NA
FZD6	CDH1	NA	NA	HLA-F	NA	NA	NA	NA	NA	NA	NA	NA	NA	NA
GADD45A	CDH10	NA	NA	HM13	NA	NA	NA	NA	NA	NA	NA	NA	NA	NA
GALNT10	CDH13	NA	NA	HSD17B14	NA	NA	NA	NA	NA	NA	NA	NA	NA	NA
GALNT5	CDH22	NA	NA	ICAM4	NA	NA	NA	NA	NA	NA	NA	NA	NA	NA
GARS	CDIPT	NA	NA	ICAM5	NA	NA	NA	NA	NA	NA	NA	NA	NA	NA
GAS6	CDK6	NA	NA	IDS	NA	NA	NA	NA	NA	NA	NA	NA	NA	NA
GATA3	CDKL3	NA	NA	IDUA	NA	NA	NA	NA	NA	NA	NA	NA	NA	NA
GBE1	CDKL4	NA	NA	IFI27L2	NA	NA	NA	NA	NA	NA	NA	NA	NA	NA
GBP3	CDKN1A	NA	NA	IFI30	NA	NA	NA	NA	NA	NA	NA	NA	NA	NA
GCNT2	CDKN2A	NA	NA	IFI6	NA	NA	NA	NA	NA	NA	NA	NA	NA	NA
GCNT4	CDKN2B	NA	NA	IGDCC4	NA	NA	NA	NA	NA	NA	NA	NA	NA	NA
GDF15	CDNF	NA	NA	IGF2R	NA	NA	NA	NA	NA	NA	NA	NA	NA	NA
GDF6	CDYL2	NA	NA	IGFBP7	NA	NA	NA	NA	NA	NA	NA	NA	NA	NA
GDPD1	CELF2	NA	NA	IL32	NA	NA	NA	NA	NA	NA	NA	NA	NA	NA
GFPT1	CENPT	NA	NA	IL6	NA	NA	NA	NA	NA	NA	NA	NA	NA	NA
GGCX	CERCAM	NA	NA	INA	NA	NA	NA	NA	NA	NA	NA	NA	NA	NA
GIPC1	CES2	NA	NA	INHBB	NA	NA	NA	NA	NA	NA	NA	NA	NA	NA
GK5	CES4A	NA	NA	INPP5A	NA	NA	NA	NA	NA	NA	NA	NA	NA	NA
GLT6D1	CFD	NA	NA	ITGAV	NA	NA	NA	NA	NA	NA	NA	NA	NA	NA
GOLGB1	CFL2	NA	NA	ITGB5	NA	NA	NA	NA	NA	NA	NA	NA	NA	NA
GOPC	CFLAR	NA	NA	ITPR2	NA	NA	NA	NA	NA	NA	NA	NA	NA	NA
GPC1	CGREF1	NA	NA	ITPRIPL2	NA	NA	NA	NA	NA	NA	NA	NA	NA	NA
GPR108	CHIC2	NA	NA	KCNH1	NA	NA	NA	NA	NA	NA	NA	NA	NA	NA
GPR137B	CHMP4C	NA	NA	KCNK6	NA	NA	NA	NA	NA	NA	NA	NA	NA	NA
GPR155	CHPF	NA	NA	KCNN2	NA	NA	NA	NA	NA	NA	NA	NA	NA	NA
GPR176	CHRDL2	NA	NA	KCTD11	NA	NA	NA	NA	NA	NA	NA	NA	NA	NA
GRAMD1B	CHRNA1	NA	NA	KCTD16	NA	NA	NA	NA	NA	NA	NA	NA	NA	NA
GRIK2	CHST11	NA	NA	KCTD4	NA	NA	NA	NA	NA	NA	NA	NA	NA	NA
GRINA	CHST2	NA	NA	KDELR3	NA	NA	NA	NA	NA	NA	NA	NA	NA	NA
GSN	CITED2	NA	NA	KIAA1324	NA	NA	NA	NA	NA	NA	NA	NA	NA	NA
GSTM3	CLCN5	NA	NA	KIRREL3	NA	NA	NA	NA	NA	NA	NA	NA	NA	NA
GSTO1	CLCNKA	NA	NA	KIT	NA	NA	NA	NA	NA	NA	NA	NA	NA	NA
GYG1	CLDN1	NA	NA	KLHL36	NA	NA	NA	NA	NA	NA	NA	NA	NA	NA
GYS1	CLDN16	NA	NA	KRTAP4-2	NA	NA	NA	NA	NA	NA	NA	NA	NA	NA
H6PD	CLEC4G	NA	NA	KRTAP4-4	NA	NA	NA	NA	NA	NA	NA	NA	NA	NA
HCFC2	CLIC3	NA	NA	L1CAM	NA	NA	NA	NA	NA	NA	NA	NA	NA	NA
HCN2	CLIC4	NA	NA	LAMA1	NA	NA	NA	NA	NA	NA	NA	NA	NA	NA
HDAC9	CLN5	NA	NA	LAMB2	NA	NA	NA	NA	NA	NA	NA	NA	NA	NA
HEATR5A	CLN8	NA	NA	LAMC1	NA	NA	NA	NA	NA	NA	NA	NA	NA	NA
HECW1	CLPTM1L	NA	NA	LAMC2	NA	NA	NA	NA	NA	NA	NA	NA	NA	NA
HECW2	CLSTN2	NA	NA	LAMP2	NA	NA	NA	NA	NA	NA	NA	NA	NA	NA
HEXB	CLTB	NA	NA	LCE2A	NA	NA	NA	NA	NA	NA	NA	NA	NA	NA
HHAT	CLTCL1	NA	NA	LCE2B	NA	NA	NA	NA	NA	NA	NA	NA	NA	NA
HINT3	CMBL	NA	NA	LCE2C	NA	NA	NA	NA	NA	NA	NA	NA	NA	NA
HIST1H2BK	CMIP	NA	NA	LGR4	NA	NA	NA	NA	NA	NA	NA	NA	NA	NA
HIVEP1	CMKLR1	NA	NA	LIMK2	NA	NA	NA	NA	NA	NA	NA	NA	NA	NA
HIVEP2	CMPK1	NA	NA	LIPH	NA	NA	NA	NA	NA	NA	NA	NA	NA	NA
HK2	CMTM4	NA	NA	LMO7	NA	NA	NA	NA	NA	NA	NA	NA	NA	NA
HLA-F	CNIH3	NA	NA	LNPEP	NA	NA	NA	NA	NA	NA	NA	NA	NA	NA
HM13	CNNM1	NA	NA	LOC389834	NA	NA	NA	NA	NA	NA	NA	NA	NA	NA
HSD17B14	CNTN1	NA	NA	LOX	NA	NA	NA	NA	NA	NA	NA	NA	NA	NA
HSPA4L	COBLL1	NA	NA	LOXL4	NA	NA	NA	NA	NA	NA	NA	NA	NA	NA
ICAM4	COG6	NA	NA	LPCAT2	NA	NA	NA	NA	NA	NA	NA	NA	NA	NA
ICAM5	COL10A1	NA	NA	LPXN	NA	NA	NA	NA	NA	NA	NA	NA	NA	NA
IDS	COL11A1	NA	NA	LRP10	NA	NA	NA	NA	NA	NA	NA	NA	NA	NA
IDUA	COL25A1	NA	NA	LRRC17	NA	NA	NA	NA	NA	NA	NA	NA	NA	NA
IFI27L2	COL2A1	NA	NA	LRRFIP1	NA	NA	NA	NA	NA	NA	NA	NA	NA	NA
IFI30	COL4A3BP	NA	NA	LRRN3	NA	NA	NA	NA	NA	NA	NA	NA	NA	NA
IFI6	COL4A5	NA	NA	LTBP1	NA	NA	NA	NA	NA	NA	NA	NA	NA	NA
IFIT3	COL4A6	NA	NA	LUZP1	NA	NA	NA	NA	NA	NA	NA	NA	NA	NA
IGDCC4	COL5A1	NA	NA	LYSMD3	NA	NA	NA	NA	NA	NA	NA	NA	NA	NA
IGF2R	COL8A1	NA	NA	MACF1	NA	NA	NA	NA	NA	NA	NA	NA	NA	NA
IGFBP7	COL8A2	NA	NA	MAFF	NA	NA	NA	NA	NA	NA	NA	NA	NA	NA
IKBIP	COMP	NA	NA	MAMDC2	NA	NA	NA	NA	NA	NA	NA	NA	NA	NA
IL1A	COPZ2	NA	NA	MAN1B1	NA	NA	NA	NA	NA	NA	NA	NA	NA	NA
IL32	COQ10B	NA	NA	MAN2A1	NA	NA	NA	NA	NA	NA	NA	NA	NA	NA
IL6	COX7A1	NA	NA	MAST4	NA	NA	NA	NA	NA	NA	NA	NA	NA	NA
INA	CPE	NA	NA	MCFD2	NA	NA	NA	NA	NA	NA	NA	NA	NA	NA
INHBB	CPEB2	NA	NA	MCTP2	NA	NA	NA	NA	NA	NA	NA	NA	NA	NA
INPP5A	CPEB4	NA	NA	MDM2	NA	NA	NA	NA	NA	NA	NA	NA	NA	NA
IRAK2	CPNE3	NA	NA	MFAP2	NA	NA	NA	NA	NA	NA	NA	NA	NA	NA
IRAK4	CPPED1	NA	NA	MFAP5	NA	NA	NA	NA	NA	NA	NA	NA	NA	NA
ITGAV	CRAT	NA	NA	MFSD1	NA	NA	NA	NA	NA	NA	NA	NA	NA	NA
ITGB5	CREB3	NA	NA	MFSD3	NA	NA	NA	NA	NA	NA	NA	NA	NA	NA
ITPR2	CREG1	NA	NA	MGAT5	NA	NA	NA	NA	NA	NA	NA	NA	NA	NA
ITPRIPL2	CRELD1	NA	NA	MGLL	NA	NA	NA	NA	NA	NA	NA	NA	NA	NA
JAZF1	CRIP2	NA	NA	MICA	NA	NA	NA	NA	NA	NA	NA	NA	NA	NA
KCNG1	CRNN	NA	NA	MINK1	NA	NA	NA	NA	NA	NA	NA	NA	NA	NA
KCNH1	CRTAC1	NA	NA	MLLT11	NA	NA	NA	NA	NA	NA	NA	NA	NA	NA
KCNK6	CRYL1	NA	NA	MOGS	NA	NA	NA	NA	NA	NA	NA	NA	NA	NA
KCNN2	CSF2	NA	NA	MPZL1	NA	NA	NA	NA	NA	NA	NA	NA	NA	NA
KCTD11	CSF2RB	NA	NA	MR1	NA	NA	NA	NA	NA	NA	NA	NA	NA	NA
KCTD16	CSGALNACT1	NA	NA	MRAS	NA	NA	NA	NA	NA	NA	NA	NA	NA	NA
KCTD4	CSGALNACT2	NA	NA	MSRB3	NA	NA	NA	NA	NA	NA	NA	NA	NA	NA
KDELR3	CSPG5	NA	NA	MTSS1	NA	NA	NA	NA	NA	NA	NA	NA	NA	NA
KIAA0355	CST1	NA	NA	MXD1	NA	NA	NA	NA	NA	NA	NA	NA	NA	NA
KIAA1324	CST2	NA	NA	MXRA5	NA	NA	NA	NA	NA	NA	NA	NA	NA	NA
KIRREL3	CST3	NA	NA	MYO6	NA	NA	NA	NA	NA	NA	NA	NA	NA	NA
KIT	CST5	NA	NA	NAALADL2	NA	NA	NA	NA	NA	NA	NA	NA	NA	NA
KLHL36	CST9L	NA	NA	NADSYN1	NA	NA	NA	NA	NA	NA	NA	NA	NA	NA
KLHL5	CTBS	NA	NA	NAPB	NA	NA	NA	NA	NA	NA	NA	NA	NA	NA
KLHL7	CTGF	NA	NA	NAV1	NA	NA	NA	NA	NA	NA	NA	NA	NA	NA
KRTAP4-2	CTSD	NA	NA	NBEAL1	NA	NA	NA	NA	NA	NA	NA	NA	NA	NA
KRTAP4-4	CTSO	NA	NA	NCF2	NA	NA	NA	NA	NA	NA	NA	NA	NA	NA
L1CAM	CTSZ	NA	NA	NCOA3	NA	NA	NA	NA	NA	NA	NA	NA	NA	NA
LAMA1	CTTN	NA	NA	NCOA7	NA	NA	NA	NA	NA	NA	NA	NA	NA	NA
LAMB2	CTTNBP2NL	NA	NA	NDEL1	NA	NA	NA	NA	NA	NA	NA	NA	NA	NA
LAMC1	CUBN	NA	NA	NDFIP2	NA	NA	NA	NA	NA	NA	NA	NA	NA	NA
LAMC2	CXADR	NA	NA	NDUFA1	NA	NA	NA	NA	NA	NA	NA	NA	NA	NA
LAMP2	CXCL10	NA	NA	NEDD4L	NA	NA	NA	NA	NA	NA	NA	NA	NA	NA
LCE2A	CXCR4	NA	NA	NEDD9	NA	NA	NA	NA	NA	NA	NA	NA	NA	NA
LCE2B	CYB5D2	NA	NA	NEGR1	NA	NA	NA	NA	NA	NA	NA	NA	NA	NA
LCE2C	CYB5R1	NA	NA	NEO1	NA	NA	NA	NA	NA	NA	NA	NA	NA	NA
LGR4	CYBA	NA	NA	NEXN	NA	NA	NA	NA	NA	NA	NA	NA	NA	NA
LHCGR	CYBRD1	NA	NA	NFAT5	NA	NA	NA	NA	NA	NA	NA	NA	NA	NA
LIMK2	CYFIP2	NA	NA	NFE2L3	NA	NA	NA	NA	NA	NA	NA	NA	NA	NA
LIPH	CYHR1	NA	NA	NFKBIZ	NA	NA	NA	NA	NA	NA	NA	NA	NA	NA
LMO7	CYP2E1	NA	NA	NIPAL2	NA	NA	NA	NA	NA	NA	NA	NA	NA	NA
LNPEP	CYP2S1	NA	NA	NIPAL3	NA	NA	NA	NA	NA	NA	NA	NA	NA	NA
LOC389834	CYP2U1	NA	NA	NLRP10	NA	NA	NA	NA	NA	NA	NA	NA	NA	NA
LOX	CYR61	NA	NA	NMNAT2	NA	NA	NA	NA	NA	NA	NA	NA	NA	NA
LOXL3	CYS1	NA	NA	NOTCH3	NA	NA	NA	NA	NA	NA	NA	NA	NA	NA
LOXL4	DAAM1	NA	NA	NOX4	NA	NA	NA	NA	NA	NA	NA	NA	NA	NA
LPCAT2	DACT1	NA	NA	NPAS2	NA	NA	NA	NA	NA	NA	NA	NA	NA	NA
LPXN	DAG1	NA	NA	NPDC1	NA	NA	NA	NA	NA	NA	NA	NA	NA	NA
LRP10	DAGLB	NA	NA	NRBP2	NA	NA	NA	NA	NA	NA	NA	NA	NA	NA
LRRC17	DAP	NA	NA	NRG1	NA	NA	NA	NA	NA	NA	NA	NA	NA	NA
LRRC2	DCAF6	NA	NA	NTF3	NA	NA	NA	NA	NA	NA	NA	NA	NA	NA
LRRFIP1	DCLK1	NA	NA	NTM	NA	NA	NA	NA	NA	NA	NA	NA	NA	NA
LRRN3	DCTN1	NA	NA	OGFRL1	NA	NA	NA	NA	NA	NA	NA	NA	NA	NA
LTBP1	DCTN6	NA	NA	OPHN1	NA	NA	NA	NA	NA	NA	NA	NA	NA	NA
LUZP1	DCUN1D3	NA	NA	OPTN	NA	NA	NA	NA	NA	NA	NA	NA	NA	NA
LY96	DDA1	NA	NA	OR5B21	NA	NA	NA	NA	NA	NA	NA	NA	NA	NA
LYSMD3	DDAH1	NA	NA	OSBPL3	NA	NA	NA	NA	NA	NA	NA	NA	NA	NA
MACF1	DDR1	NA	NA	OSR2	NA	NA	NA	NA	NA	NA	NA	NA	NA	NA
MAFF	DDR2	NA	NA	OSTC	NA	NA	NA	NA	NA	NA	NA	NA	NA	NA
MAMDC2	DDRGK1	NA	NA	OSTM1	NA	NA	NA	NA	NA	NA	NA	NA	NA	NA
MAN1B1	DDX58	NA	NA	OTUB2	NA	NA	NA	NA	NA	NA	NA	NA	NA	NA
MAN2A1	DEDD2	NA	NA	P4HA1	NA	NA	NA	NA	NA	NA	NA	NA	NA	NA
MAST4	DENND2C	NA	NA	P4HA2	NA	NA	NA	NA	NA	NA	NA	NA	NA	NA
MCFD2	DGAT2	NA	NA	PAG1	NA	NA	NA	NA	NA	NA	NA	NA	NA	NA
MCTP2	DGKA	NA	NA	PAMR1	NA	NA	NA	NA	NA	NA	NA	NA	NA	NA
MDM2	DGKI	NA	NA	PCDHB10	NA	NA	NA	NA	NA	NA	NA	NA	NA	NA
MFAP2	DHCR7	NA	NA	PCDHB11	NA	NA	NA	NA	NA	NA	NA	NA	NA	NA
MFAP3	DHDH	NA	NA	PCDHB13	NA	NA	NA	NA	NA	NA	NA	NA	NA	NA
MFAP5	DHRS1	NA	NA	PCDHB14	NA	NA	NA	NA	NA	NA	NA	NA	NA	NA
MFSD1	DHRS12	NA	NA	PCDHB15	NA	NA	NA	NA	NA	NA	NA	NA	NA	NA
MFSD3	DHRS7	NA	NA	PCDHB16	NA	NA	NA	NA	NA	NA	NA	NA	NA	NA
MGAT5	DHRS7B	NA	NA	PCDHB8	NA	NA	NA	NA	NA	NA	NA	NA	NA	NA
MGLL	DIRC2	NA	NA	PCDHB9	NA	NA	NA	NA	NA	NA	NA	NA	NA	NA
MICA	DIXDC1	NA	NA	PCYT1A	NA	NA	NA	NA	NA	NA	NA	NA	NA	NA
MICAL2	DKK2	NA	NA	PDCD1LG2	NA	NA	NA	NA	NA	NA	NA	NA	NA	NA
MINK1	DKK3	NA	NA	PDCD4	NA	NA	NA	NA	NA	NA	NA	NA	NA	NA
MLLT11	DLL1	NA	NA	PDLIM5	NA	NA	NA	NA	NA	NA	NA	NA	NA	NA
MMP17	DMD	NA	NA	PEA15	NA	NA	NA	NA	NA	NA	NA	NA	NA	NA
MMP2	DMPK	NA	NA	PGM5	NA	NA	NA	NA	NA	NA	NA	NA	NA	NA
MOGS	DMRTA1	NA	NA	PHLDA3	NA	NA	NA	NA	NA	NA	NA	NA	NA	NA
MPZL1	DNAH1	NA	NA	PIK3C3	NA	NA	NA	NA	NA	NA	NA	NA	NA	NA
MR1	DNAJB4	NA	NA	PIK3IP1	NA	NA	NA	NA	NA	NA	NA	NA	NA	NA
MRAS	DNAJB6	NA	NA	PITPNM3	NA	NA	NA	NA	NA	NA	NA	NA	NA	NA
MSRB3	DNAJB9	NA	NA	PLA2G15	NA	NA	NA	NA	NA	NA	NA	NA	NA	NA
MTSS1	DNAJC1	NA	NA	PLA2G16	NA	NA	NA	NA	NA	NA	NA	NA	NA	NA
MXD1	DNAJC6	NA	NA	PLA2G4C	NA	NA	NA	NA	NA	NA	NA	NA	NA	NA
MXRA5	DNASE1L1	NA	NA	PLAT	NA	NA	NA	NA	NA	NA	NA	NA	NA	NA
MYO6	DNER	NA	NA	PLCB4	NA	NA	NA	NA	NA	NA	NA	NA	NA	NA
NAALADL2	DOCK9	NA	NA	PLEKHA1	NA	NA	NA	NA	NA	NA	NA	NA	NA	NA
NADSYN1	DOK1	NA	NA	PLK3	NA	NA	NA	NA	NA	NA	NA	NA	NA	NA
NAPB	DOK7	NA	NA	PLOD2	NA	NA	NA	NA	NA	NA	NA	NA	NA	NA
NAV1	DPH3	NA	NA	PLXNA3	NA	NA	NA	NA	NA	NA	NA	NA	NA	NA
NBEAL1	DPP7	NA	NA	PMAIP1	NA	NA	NA	NA	NA	NA	NA	NA	NA	NA
NCF2	DRAM1	NA	NA	POLD4	NA	NA	NA	NA	NA	NA	NA	NA	NA	NA
NCOA3	DRP2	NA	NA	PORCN	NA	NA	NA	NA	NA	NA	NA	NA	NA	NA
NCOA7	DSP	NA	NA	PPFIBP1	NA	NA	NA	NA	NA	NA	NA	NA	NA	NA
NDEL1	DUSP1	NA	NA	PPFIBP2	NA	NA	NA	NA	NA	NA	NA	NA	NA	NA
NDFIP2	DUSP23	NA	NA	PPM1K	NA	NA	NA	NA	NA	NA	NA	NA	NA	NA
NDUFA1	DUSP3	NA	NA	PPP1R3C	NA	NA	NA	NA	NA	NA	NA	NA	NA	NA
NEDD4L	DUSP6	NA	NA	PPP2R5B	NA	NA	NA	NA	NA	NA	NA	NA	NA	NA
NEDD9	DYNC1I1	NA	NA	PRDM1	NA	NA	NA	NA	NA	NA	NA	NA	NA	NA
NEGR1	DYNC1LI2	NA	NA	PRDX5	NA	NA	NA	NA	NA	NA	NA	NA	NA	NA
NEK10	DYNLT3	NA	NA	PRDX6	NA	NA	NA	NA	NA	NA	NA	NA	NA	NA
NEO1	DYRK1B	NA	NA	PRNP	NA	NA	NA	NA	NA	NA	NA	NA	NA	NA
NETO1	DYSF	NA	NA	PSG1	NA	NA	NA	NA	NA	NA	NA	NA	NA	NA
NEXN	EBI3	NA	NA	PSG2	NA	NA	NA	NA	NA	NA	NA	NA	NA	NA
NFAT5	ECM1	NA	NA	PSG3	NA	NA	NA	NA	NA	NA	NA	NA	NA	NA
NFE2L3	EDA2R	NA	NA	PSTPIP2	NA	NA	NA	NA	NA	NA	NA	NA	NA	NA
NFKB1	EDEM3	NA	NA	PTGFR	NA	NA	NA	NA	NA	NA	NA	NA	NA	NA
NFKB2	EDIL3	NA	NA	PTGIR	NA	NA	NA	NA	NA	NA	NA	NA	NA	NA
NFKBIE	EDN1	NA	NA	PTPN13	NA	NA	NA	NA	NA	NA	NA	NA	NA	NA
NFKBIZ	EEF1A2	NA	NA	PURA	NA	NA	NA	NA	NA	NA	NA	NA	NA	NA
NIPAL2	EFEMP2	NA	NA	QPCT	NA	NA	NA	NA	NA	NA	NA	NA	NA	NA
NIPAL3	EFHD1	NA	NA	QPRT	NA	NA	NA	NA	NA	NA	NA	NA	NA	NA
NKX2-6	EFNA3	NA	NA	RAB11FIP5	NA	NA	NA	NA	NA	NA	NA	NA	NA	NA
NLGN1	EFNA5	NA	NA	RAB5A	NA	NA	NA	NA	NA	NA	NA	NA	NA	NA
NLRP10	EGF	NA	NA	RAI14	NA	NA	NA	NA	NA	NA	NA	NA	NA	NA
NMNAT2	EGLN1	NA	NA	RAPH1	NA	NA	NA	NA	NA	NA	NA	NA	NA	NA
NOTCH3	EGLN3	NA	NA	RASA2	NA	NA	NA	NA	NA	NA	NA	NA	NA	NA
NOX4	EGR2	NA	NA	RASGRP1	NA	NA	NA	NA	NA	NA	NA	NA	NA	NA
NPAS2	EHF	NA	NA	RBM24	NA	NA	NA	NA	NA	NA	NA	NA	NA	NA
NPDC1	EIF4EBP2	NA	NA	RDH10	NA	NA	NA	NA	NA	NA	NA	NA	NA	NA
NRBP2	EIF5A2	NA	NA	RECK	NA	NA	NA	NA	NA	NA	NA	NA	NA	NA
NRG1	ELFN1	NA	NA	REEP2	NA	NA	NA	NA	NA	NA	NA	NA	NA	NA
NTF3	ELMOD1	NA	NA	REN	NA	NA	NA	NA	NA	NA	NA	NA	NA	NA
NTM	EME2	NA	NA	RFTN1	NA	NA	NA	NA	NA	NA	NA	NA	NA	NA
OGFRL1	ENC1	NA	NA	RGS5	NA	NA	NA	NA	NA	NA	NA	NA	NA	NA
OPHN1	ENPP4	NA	NA	RGS9	NA	NA	NA	NA	NA	NA	NA	NA	NA	NA
OPTN	EPB41L1	NA	NA	RHBDF2	NA	NA	NA	NA	NA	NA	NA	NA	NA	NA
OR2L2	EPB42	NA	NA	RHOC	NA	NA	NA	NA	NA	NA	NA	NA	NA	NA
OR5B21	EPHA2	NA	NA	RHOQ	NA	NA	NA	NA	NA	NA	NA	NA	NA	NA
OSBPL3	EPHA8	NA	NA	RIN2	NA	NA	NA	NA	NA	NA	NA	NA	NA	NA
OSR2	EPHX4	NA	NA	RIOK3	NA	NA	NA	NA	NA	NA	NA	NA	NA	NA
OSTC	EPS8L2	NA	NA	RIT1	NA	NA	NA	NA	NA	NA	NA	NA	NA	NA
OSTM1	ERLEC1	NA	NA	RNF144B	NA	NA	NA	NA	NA	NA	NA	NA	NA	NA
OTUB2	ERMAP	NA	NA	RNF150	NA	NA	NA	NA	NA	NA	NA	NA	NA	NA
P4HA1	ERP44	NA	NA	RPS27L	NA	NA	NA	NA	NA	NA	NA	NA	NA	NA
P4HA2	ERRFI1	NA	NA	RRM2B	NA	NA	NA	NA	NA	NA	NA	NA	NA	NA
PAG1	ETHE1	NA	NA	RSPH3	NA	NA	NA	NA	NA	NA	NA	NA	NA	NA
PAMR1	ETNK2	NA	NA	SAMD12	NA	NA	NA	NA	NA	NA	NA	NA	NA	NA
PARP8	ETV5	NA	NA	SAMD4A	NA	NA	NA	NA	NA	NA	NA	NA	NA	NA
PCBP4	EVC	NA	NA	SAMD9L	NA	NA	NA	NA	NA	NA	NA	NA	NA	NA
PCDHB10	EVI5	NA	NA	SAT1	NA	NA	NA	NA	NA	NA	NA	NA	NA	NA
PCDHB11	EVI5L	NA	NA	SCD5	NA	NA	NA	NA	NA	NA	NA	NA	NA	NA
PCDHB13	EXD2	NA	NA	SCN8A	NA	NA	NA	NA	NA	NA	NA	NA	NA	NA
PCDHB14	EXPH5	NA	NA	SCUBE3	NA	NA	NA	NA	NA	NA	NA	NA	NA	NA
PCDHB15	EXTL1	NA	NA	SEC14L1	NA	NA	NA	NA	NA	NA	NA	NA	NA	NA
PCDHB16	F2RL1	NA	NA	SEMA3C	NA	NA	NA	NA	NA	NA	NA	NA	NA	NA
PCDHB7	F2RL2	NA	NA	SEMA5A	NA	NA	NA	NA	NA	NA	NA	NA	NA	NA
PCDHB8	F3	NA	NA	SEMA6A	NA	NA	NA	NA	NA	NA	NA	NA	NA	NA
PCDHB9	F8	NA	NA	SEMA6D	NA	NA	NA	NA	NA	NA	NA	NA	NA	NA
PCYT1A	FABP3	NA	NA	SERINC2	NA	NA	NA	NA	NA	NA	NA	NA	NA	NA
PDCD1LG2	FADS3	NA	NA	SERINC3	NA	NA	NA	NA	NA	NA	NA	NA	NA	NA
PDCD4	FAM107A	NA	NA	SERPINA9	NA	NA	NA	NA	NA	NA	NA	NA	NA	NA
PDHB	FAM129B	NA	NA	SERPINB8	NA	NA	NA	NA	NA	NA	NA	NA	NA	NA
PDLIM4	FAM129C	NA	NA	SERPINE1	NA	NA	NA	NA	NA	NA	NA	NA	NA	NA
PDLIM5	FAM13B	NA	NA	SERPINE2	NA	NA	NA	NA	NA	NA	NA	NA	NA	NA
PEA15	FAM151B	NA	NA	SERTAD4	NA	NA	NA	NA	NA	NA	NA	NA	NA	NA
PGM3	FAM162A	NA	NA	SESN1	NA	NA	NA	NA	NA	NA	NA	NA	NA	NA
PGM5	FAM167A	NA	NA	SETD7	NA	NA	NA	NA	NA	NA	NA	NA	NA	NA
PHLDA2	FAM174A	NA	NA	SFXN3	NA	NA	NA	NA	NA	NA	NA	NA	NA	NA
PHLDA3	FAM187B	NA	NA	SGIP1	NA	NA	NA	NA	NA	NA	NA	NA	NA	NA
PIK3C3	FAM198B	NA	NA	SGK1	NA	NA	NA	NA	NA	NA	NA	NA	NA	NA
PIK3IP1	FAM3C	NA	NA	SGMS2	NA	NA	NA	NA	NA	NA	NA	NA	NA	NA
PITPNM3	FAM43A	NA	NA	SGTB	NA	NA	NA	NA	NA	NA	NA	NA	NA	NA
PKD2	FAM50B	NA	NA	SH3BGRL2	NA	NA	NA	NA	NA	NA	NA	NA	NA	NA
PLA2G15	FAM71F1	NA	NA	SH3GLB1	NA	NA	NA	NA	NA	NA	NA	NA	NA	NA
PLA2G16	FAM71F2	NA	NA	SH3PXD2A	NA	NA	NA	NA	NA	NA	NA	NA	NA	NA
PLA2G4C	FAM8A1	NA	NA	SH3RF1	NA	NA	NA	NA	NA	NA	NA	NA	NA	NA
PLAT	FANK1	NA	NA	SH3TC2	NA	NA	NA	NA	NA	NA	NA	NA	NA	NA
PLCB4	FAP	NA	NA	SHANK1	NA	NA	NA	NA	NA	NA	NA	NA	NA	NA
PLEKHA1	FAR2	NA	NA	SHC3	NA	NA	NA	NA	NA	NA	NA	NA	NA	NA
PLEKHF2	FAS	NA	NA	SHOX2	NA	NA	NA	NA	NA	NA	NA	NA	NA	NA
PLK3	FAT1	NA	NA	SHROOM3	NA	NA	NA	NA	NA	NA	NA	NA	NA	NA
PLOD2	FBN1	NA	NA	SIL1	NA	NA	NA	NA	NA	NA	NA	NA	NA	NA
PLXNA3	FBN2	NA	NA	SLC12A4	NA	NA	NA	NA	NA	NA	NA	NA	NA	NA
PMAIP1	FBXL16	NA	NA	SLC17A5	NA	NA	NA	NA	NA	NA	NA	NA	NA	NA
POLD4	FBXL2	NA	NA	SLC1A1	NA	NA	NA	NA	NA	NA	NA	NA	NA	NA
PORCN	FBXO2	NA	NA	SLC20A2	NA	NA	NA	NA	NA	NA	NA	NA	NA	NA
PPFIBP1	FBXO9	NA	NA	SLC22A18	NA	NA	NA	NA	NA	NA	NA	NA	NA	NA
PPFIBP2	FBXW4	NA	NA	SLC22A4	NA	NA	NA	NA	NA	NA	NA	NA	NA	NA
PPM1K	FCGRT	NA	NA	SLC22A5	NA	NA	NA	NA	NA	NA	NA	NA	NA	NA
PPP1R3C	FCHSD1	NA	NA	SLC25A20	NA	NA	NA	NA	NA	NA	NA	NA	NA	NA
PPP2R5B	FCHSD2	NA	NA	SLC2A13	NA	NA	NA	NA	NA	NA	NA	NA	NA	NA
PRDM1	FER1L4	NA	NA	SLC2A14	NA	NA	NA	NA	NA	NA	NA	NA	NA	NA
PRDX5	FGD4	NA	NA	SLC30A4	NA	NA	NA	NA	NA	NA	NA	NA	NA	NA
PRDX6	FGF11	NA	NA	SLC31A2	NA	NA	NA	NA	NA	NA	NA	NA	NA	NA
PREPL	FGF2	NA	NA	SLC33A1	NA	NA	NA	NA	NA	NA	NA	NA	NA	NA
PRNP	FHDC1	NA	NA	SLC35B3	NA	NA	NA	NA	NA	NA	NA	NA	NA	NA
PSG1	FHL2	NA	NA	SLC35F5	NA	NA	NA	NA	NA	NA	NA	NA	NA	NA
PSG2	FHOD3	NA	NA	SLC36A1	NA	NA	NA	NA	NA	NA	NA	NA	NA	NA
PSG3	FIBCD1	NA	NA	SLC39A13	NA	NA	NA	NA	NA	NA	NA	NA	NA	NA
PSTPIP2	FIBIN	NA	NA	SLC39A6	NA	NA	NA	NA	NA	NA	NA	NA	NA	NA
PTGFR	FILIP1L	NA	NA	SLC41A2	NA	NA	NA	NA	NA	NA	NA	NA	NA	NA
PTGIR	FKBP1A	NA	NA	SLC46A3	NA	NA	NA	NA	NA	NA	NA	NA	NA	NA
PTPN13	FKBP1B	NA	NA	SLC7A5	NA	NA	NA	NA	NA	NA	NA	NA	NA	NA
PTX3	FKBP8	NA	NA	SLC9A3R2	NA	NA	NA	NA	NA	NA	NA	NA	NA	NA
PURA	FKBP9	NA	NA	SLC9A7	NA	NA	NA	NA	NA	NA	NA	NA	NA	NA
QPCT	FLNB	NA	NA	SMURF2	NA	NA	NA	NA	NA	NA	NA	NA	NA	NA
QPRT	FLT1	NA	NA	SP100	NA	NA	NA	NA	NA	NA	NA	NA	NA	NA
RAB11FIP5	FLYWCH1	NA	NA	SPARC	NA	NA	NA	NA	NA	NA	NA	NA	NA	NA
RAB5A	FMN1	NA	NA	SPATA18	NA	NA	NA	NA	NA	NA	NA	NA	NA	NA
RAI14	FMOD	NA	NA	SPOCK1	NA	NA	NA	NA	NA	NA	NA	NA	NA	NA
RANBP17	FN3K	NA	NA	SPTAN1	NA	NA	NA	NA	NA	NA	NA	NA	NA	NA
RAPH1	FNDC1	NA	NA	SRGN	NA	NA	NA	NA	NA	NA	NA	NA	NA	NA
RASA2	FNDC3B	NA	NA	SRPX2	NA	NA	NA	NA	NA	NA	NA	NA	NA	NA
RASGRP1	FNDC4	NA	NA	STARD4	NA	NA	NA	NA	NA	NA	NA	NA	NA	NA
RASGRP3	FOXA1	NA	NA	STIM1	NA	NA	NA	NA	NA	NA	NA	NA	NA	NA
RBM24	FOXE1	NA	NA	STK10	NA	NA	NA	NA	NA	NA	NA	NA	NA	NA
RDH10	FOXJ1	NA	NA	STX12	NA	NA	NA	NA	NA	NA	NA	NA	NA	NA
RECK	FPR3	NA	NA	STX3	NA	NA	NA	NA	NA	NA	NA	NA	NA	NA
REEP2	FRMD3	NA	NA	STX4	NA	NA	NA	NA	NA	NA	NA	NA	NA	NA
RELB	FRMD6	NA	NA	STXBP6	NA	NA	NA	NA	NA	NA	NA	NA	NA	NA
REN	FRY	NA	NA	SVIL	NA	NA	NA	NA	NA	NA	NA	NA	NA	NA
RFTN1	FSCN2	NA	NA	SYNGR2	NA	NA	NA	NA	NA	NA	NA	NA	NA	NA
RFTN2	FSTL3	NA	NA	TAF13	NA	NA	NA	NA	NA	NA	NA	NA	NA	NA
RGS5	FUCA1	NA	NA	TBC1D2	NA	NA	NA	NA	NA	NA	NA	NA	NA	NA
RGS9	FZD6	NA	NA	TBC1D4	NA	NA	NA	NA	NA	NA	NA	NA	NA	NA
RHBDF2	GAA	NA	NA	TBC1D8B	NA	NA	NA	NA	NA	NA	NA	NA	NA	NA
RHOC	GABARAPL1	NA	NA	TCP11L1	NA	NA	NA	NA	NA	NA	NA	NA	NA	NA
RHOQ	GABBR2	NA	NA	TCTA	NA	NA	NA	NA	NA	NA	NA	NA	NA	NA
RIN2	GABRD	NA	NA	TEX2	NA	NA	NA	NA	NA	NA	NA	NA	NA	NA
RIOK3	GADD45A	NA	NA	TFAP2A	NA	NA	NA	NA	NA	NA	NA	NA	NA	NA
RIT1	GADD45B	NA	NA	TFEB	NA	NA	NA	NA	NA	NA	NA	NA	NA	NA
RNF144B	GALC	NA	NA	TG	NA	NA	NA	NA	NA	NA	NA	NA	NA	NA
RNF150	GALNT10	NA	NA	TGFBR2	NA	NA	NA	NA	NA	NA	NA	NA	NA	NA
RPS27L	GALNT11	NA	NA	TGM2	NA	NA	NA	NA	NA	NA	NA	NA	NA	NA
RPS6KC1	GALNT5	NA	NA	THY1	NA	NA	NA	NA	NA	NA	NA	NA	NA	NA
RRM2B	GALR2	NA	NA	TIAM1	NA	NA	NA	NA	NA	NA	NA	NA	NA	NA
RSPH3	GAMT	NA	NA	TIMP3	NA	NA	NA	NA	NA	NA	NA	NA	NA	NA
SAMD12	GAS2L2	NA	NA	TM6SF2	NA	NA	NA	NA	NA	NA	NA	NA	NA	NA
SAMD4A	GAS6	NA	NA	TMEM106A	NA	NA	NA	NA	NA	NA	NA	NA	NA	NA
SAMD9L	GATA3	NA	NA	TMEM117	NA	NA	NA	NA	NA	NA	NA	NA	NA	NA
SAT1	GATA6	NA	NA	TMEM131	NA	NA	NA	NA	NA	NA	NA	NA	NA	NA
SATB2	GBA	NA	NA	TMEM136	NA	NA	NA	NA	NA	NA	NA	NA	NA	NA
SCD5	GBE1	NA	NA	TMEM150A	NA	NA	NA	NA	NA	NA	NA	NA	NA	NA
SCN8A	GCC2	NA	NA	TMEM154	NA	NA	NA	NA	NA	NA	NA	NA	NA	NA
SCUBE3	GCKR	NA	NA	TMEM156	NA	NA	NA	NA	NA	NA	NA	NA	NA	NA
SEC14L1	GCNT2	NA	NA	TMEM200A	NA	NA	NA	NA	NA	NA	NA	NA	NA	NA
SEMA3C	GCNT4	NA	NA	TMEM217	NA	NA	NA	NA	NA	NA	NA	NA	NA	NA
SEMA5A	GDE1	NA	NA	TMEM9B	NA	NA	NA	NA	NA	NA	NA	NA	NA	NA
SEMA6A	GDF11	NA	NA	TNFAIP1	NA	NA	NA	NA	NA	NA	NA	NA	NA	NA
SEMA6D	GDF15	NA	NA	TNFRSF10B	NA	NA	NA	NA	NA	NA	NA	NA	NA	NA
SERINC2	GDF6	NA	NA	TNFRSF10D	NA	NA	NA	NA	NA	NA	NA	NA	NA	NA
SERINC3	GDI1	NA	NA	TNFSF18	NA	NA	NA	NA	NA	NA	NA	NA	NA	NA
SERPINA9	GDNF	NA	NA	TNFSF4	NA	NA	NA	NA	NA	NA	NA	NA	NA	NA
SERPINB8	GDPD1	NA	NA	TNIP1	NA	NA	NA	NA	NA	NA	NA	NA	NA	NA
SERPINE1	GDPD5	NA	NA	TOB1	NA	NA	NA	NA	NA	NA	NA	NA	NA	NA
SERPINE2	GFOD1	NA	NA	TP53INP1	NA	NA	NA	NA	NA	NA	NA	NA	NA	NA
SERTAD4	GFPT1	NA	NA	TPBG	NA	NA	NA	NA	NA	NA	NA	NA	NA	NA
SESN1	GHR	NA	NA	TPM1	NA	NA	NA	NA	NA	NA	NA	NA	NA	NA
SESN2	GIPC1	NA	NA	TPRG1L	NA	NA	NA	NA	NA	NA	NA	NA	NA	NA
SETD7	GJA5	NA	NA	TRAK1	NA	NA	NA	NA	NA	NA	NA	NA	NA	NA
SFXN3	GJB2	NA	NA	TRAK2	NA	NA	NA	NA	NA	NA	NA	NA	NA	NA
SGCZ	GK5	NA	NA	TRIM22	NA	NA	NA	NA	NA	NA	NA	NA	NA	NA
SGIP1	GLB1	NA	NA	TRIML2	NA	NA	NA	NA	NA	NA	NA	NA	NA	NA
SGK1	GLIPR1	NA	NA	TRPC1	NA	NA	NA	NA	NA	NA	NA	NA	NA	NA
SGMS2	GLRX	NA	NA	TRPC4	NA	NA	NA	NA	NA	NA	NA	NA	NA	NA
SGTB	GLS	NA	NA	TRPM4	NA	NA	NA	NA	NA	NA	NA	NA	NA	NA
SH3BGRL2	GLTP	NA	NA	TRPV2	NA	NA	NA	NA	NA	NA	NA	NA	NA	NA
SH3GLB1	GMIP	NA	NA	TSPAN13	NA	NA	NA	NA	NA	NA	NA	NA	NA	NA
SH3PXD2A	GNAI2	NA	NA	TSPAN14	NA	NA	NA	NA	NA	NA	NA	NA	NA	NA
SH3RF1	GNPTAB	NA	NA	TSPAN9	NA	NA	NA	NA	NA	NA	NA	NA	NA	NA
SH3TC2	GNPTG	NA	NA	TTC3	NA	NA	NA	NA	NA	NA	NA	NA	NA	NA
SHANK1	GOLGB1	NA	NA	TUBB2A	NA	NA	NA	NA	NA	NA	NA	NA	NA	NA
SHC3	GPLD1	NA	NA	UBL3	NA	NA	NA	NA	NA	NA	NA	NA	NA	NA
SHOX2	GPR1	NA	NA	UCHL1	NA	NA	NA	NA	NA	NA	NA	NA	NA	NA
SHROOM3	GPR107	NA	NA	UFM1	NA	NA	NA	NA	NA	NA	NA	NA	NA	NA
SIL1	GPR108	NA	NA	ULBP1	NA	NA	NA	NA	NA	NA	NA	NA	NA	NA
SIPA1L3	GPR132	NA	NA	UNC13B	NA	NA	NA	NA	NA	NA	NA	NA	NA	NA
SLC12A4	GPR137	NA	NA	USP53	NA	NA	NA	NA	NA	NA	NA	NA	NA	NA
SLC16A12	GPR137B	NA	NA	VAMP2	NA	NA	NA	NA	NA	NA	NA	NA	NA	NA
SLC16A4	GPR146	NA	NA	VAT1	NA	NA	NA	NA	NA	NA	NA	NA	NA	NA
SLC17A5	GPR151	NA	NA	VGLL3	NA	NA	NA	NA	NA	NA	NA	NA	NA	NA
SLC1A1	GPR155	NA	NA	WDR26	NA	NA	NA	NA	NA	NA	NA	NA	NA	NA
SLC20A2	GPR157	NA	NA	WDR41	NA	NA	NA	NA	NA	NA	NA	NA	NA	NA
SLC22A18	GPR35	NA	NA	WDR63	NA	NA	NA	NA	NA	NA	NA	NA	NA	NA
SLC22A4	GPR52	NA	NA	WDR66	NA	NA	NA	NA	NA	NA	NA	NA	NA	NA
SLC22A5	GPR6	NA	NA	WIPI1	NA	NA	NA	NA	NA	NA	NA	NA	NA	NA
SLC25A20	GPX3	NA	NA	WNT16	NA	NA	NA	NA	NA	NA	NA	NA	NA	NA
SLC2A13	GRAMD1B	NA	NA	WNT5A	NA	NA	NA	NA	NA	NA	NA	NA	NA	NA
SLC2A14	GRB2	NA	NA	WNT5B	NA	NA	NA	NA	NA	NA	NA	NA	NA	NA
SLC30A4	GREB1L	NA	NA	XDH	NA	NA	NA	NA	NA	NA	NA	NA	NA	NA
SLC31A2	GRK4	NA	NA	YPEL2	NA	NA	NA	NA	NA	NA	NA	NA	NA	NA
SLC33A1	GRN	NA	NA	ZBTB46	NA	NA	NA	NA	NA	NA	NA	NA	NA	NA
SLC35B3	GSN	NA	NA	ZDHHC24	NA	NA	NA	NA	NA	NA	NA	NA	NA	NA
SLC35F5	GSTM3	NA	NA	ZFHX2	NA	NA	NA	NA	NA	NA	NA	NA	NA	NA
SLC36A1	GSTO1	NA	NA	ZMAT3	NA	NA	NA	NA	NA	NA	NA	NA	NA	NA
SLC39A13	GUK1	NA	NA	ZNF264	NA	NA	NA	NA	NA	NA	NA	NA	NA	NA
SLC39A6	GYS1	NA	NA	ZNF432	NA	NA	NA	NA	NA	NA	NA	NA	NA	NA
SLC41A2	H6PD	NA	NA	ZNF583	NA	NA	NA	NA	NA	NA	NA	NA	NA	NA
SLC46A3	HAGH	NA	NA	ZNF622	NA	NA	NA	NA	NA	NA	NA	NA	NA	NA
SLC7A5	HAGHL	NA	NA	ZNF654	NA	NA	NA	NA	NA	NA	NA	NA	NA	NA
SLC9A1	HAPLN1	NA	NA	ZNFX1	NA	NA	NA	NA	NA	NA	NA	NA	NA	NA
SLC9A3R2	HAS1	NA	NA	NA	NA	NA	NA	NA	NA	NA	NA	NA	NA	NA
SLC9A7	HBEGF	NA	NA	NA	NA	NA	NA	NA	NA	NA	NA	NA	NA	NA
SLFN12	HCCS	NA	NA	NA	NA	NA	NA	NA	NA	NA	NA	NA	NA	NA
SMURF2	HCN2	NA	NA	NA	NA	NA	NA	NA	NA	NA	NA	NA	NA	NA
SP100	HCN3	NA	NA	NA	NA	NA	NA	NA	NA	NA	NA	NA	NA	NA
SPARC	HCST	NA	NA	NA	NA	NA	NA	NA	NA	NA	NA	NA	NA	NA
SPATA18	HDAC11	NA	NA	NA	NA	NA	NA	NA	NA	NA	NA	NA	NA	NA
SPOCK1	HDAC9	NA	NA	NA	NA	NA	NA	NA	NA	NA	NA	NA	NA	NA
SPRED1	HEATR5A	NA	NA	NA	NA	NA	NA	NA	NA	NA	NA	NA	NA	NA
SPTAN1	HEATR5B	NA	NA	NA	NA	NA	NA	NA	NA	NA	NA	NA	NA	NA
SQLE	HECW1	NA	NA	NA	NA	NA	NA	NA	NA	NA	NA	NA	NA	NA
SRGN	HECW2	NA	NA	NA	NA	NA	NA	NA	NA	NA	NA	NA	NA	NA
SRPX2	HERPUD1	NA	NA	NA	NA	NA	NA	NA	NA	NA	NA	NA	NA	NA
SSTR1	HES3	NA	NA	NA	NA	NA	NA	NA	NA	NA	NA	NA	NA	NA
STARD4	HES4	NA	NA	NA	NA	NA	NA	NA	NA	NA	NA	NA	NA	NA
STIM1	HEXB	NA	NA	NA	NA	NA	NA	NA	NA	NA	NA	NA	NA	NA
STK10	HGSNAT	NA	NA	NA	NA	NA	NA	NA	NA	NA	NA	NA	NA	NA
STX12	HHAT	NA	NA	NA	NA	NA	NA	NA	NA	NA	NA	NA	NA	NA
STX3	HHIP	NA	NA	NA	NA	NA	NA	NA	NA	NA	NA	NA	NA	NA
STX4	HIF1A	NA	NA	NA	NA	NA	NA	NA	NA	NA	NA	NA	NA	NA
STX6	HINT3	NA	NA	NA	NA	NA	NA	NA	NA	NA	NA	NA	NA	NA
STXBP6	HIPK3	NA	NA	NA	NA	NA	NA	NA	NA	NA	NA	NA	NA	NA
SVIL	HIST1H1T	NA	NA	NA	NA	NA	NA	NA	NA	NA	NA	NA	NA	NA
SYNGR2	HIST1H2BK	NA	NA	NA	NA	NA	NA	NA	NA	NA	NA	NA	NA	NA
SYT1	HIST2H2BE	NA	NA	NA	NA	NA	NA	NA	NA	NA	NA	NA	NA	NA
TAC3	HIVEP1	NA	NA	NA	NA	NA	NA	NA	NA	NA	NA	NA	NA	NA
TAF13	HIVEP2	NA	NA	NA	NA	NA	NA	NA	NA	NA	NA	NA	NA	NA
TBC1D2	HK2	NA	NA	NA	NA	NA	NA	NA	NA	NA	NA	NA	NA	NA
TBC1D4	HLA-DPA1	NA	NA	NA	NA	NA	NA	NA	NA	NA	NA	NA	NA	NA
TBC1D8B	HLA-DPB1	NA	NA	NA	NA	NA	NA	NA	NA	NA	NA	NA	NA	NA
TCP11L1	HLA-F	NA	NA	NA	NA	NA	NA	NA	NA	NA	NA	NA	NA	NA
TCTA	HM13	NA	NA	NA	NA	NA	NA	NA	NA	NA	NA	NA	NA	NA
TDG	HNF4A	NA	NA	NA	NA	NA	NA	NA	NA	NA	NA	NA	NA	NA
TEX2	HOXB5	NA	NA	NA	NA	NA	NA	NA	NA	NA	NA	NA	NA	NA
TFAP2A	HSD17B14	NA	NA	NA	NA	NA	NA	NA	NA	NA	NA	NA	NA	NA
TFEB	HSD17B2	NA	NA	NA	NA	NA	NA	NA	NA	NA	NA	NA	NA	NA
TG	HSD3B7	NA	NA	NA	NA	NA	NA	NA	NA	NA	NA	NA	NA	NA
TGFBR2	HSPB6	NA	NA	NA	NA	NA	NA	NA	NA	NA	NA	NA	NA	NA
TGM2	HSPB8	NA	NA	NA	NA	NA	NA	NA	NA	NA	NA	NA	NA	NA
THY1	HSPG2	NA	NA	NA	NA	NA	NA	NA	NA	NA	NA	NA	NA	NA
TIAM1	HTR1D	NA	NA	NA	NA	NA	NA	NA	NA	NA	NA	NA	NA	NA
TIMP3	HTR1E	NA	NA	NA	NA	NA	NA	NA	NA	NA	NA	NA	NA	NA
TLR6	ICAM1	NA	NA	NA	NA	NA	NA	NA	NA	NA	NA	NA	NA	NA
TM6SF1	ICAM4	NA	NA	NA	NA	NA	NA	NA	NA	NA	NA	NA	NA	NA
TM6SF2	ICAM5	NA	NA	NA	NA	NA	NA	NA	NA	NA	NA	NA	NA	NA
TMEM106A	IDS	NA	NA	NA	NA	NA	NA	NA	NA	NA	NA	NA	NA	NA
TMEM117	IDUA	NA	NA	NA	NA	NA	NA	NA	NA	NA	NA	NA	NA	NA
TMEM130	IER3	NA	NA	NA	NA	NA	NA	NA	NA	NA	NA	NA	NA	NA
TMEM131	IFI27L2	NA	NA	NA	NA	NA	NA	NA	NA	NA	NA	NA	NA	NA
TMEM132A	IFI30	NA	NA	NA	NA	NA	NA	NA	NA	NA	NA	NA	NA	NA
TMEM136	IFI6	NA	NA	NA	NA	NA	NA	NA	NA	NA	NA	NA	NA	NA
TMEM150A	IFNGR1	NA	NA	NA	NA	NA	NA	NA	NA	NA	NA	NA	NA	NA
TMEM154	IFNGR2	NA	NA	NA	NA	NA	NA	NA	NA	NA	NA	NA	NA	NA
TMEM156	IGDCC4	NA	NA	NA	NA	NA	NA	NA	NA	NA	NA	NA	NA	NA
TMEM167A	IGF1R	NA	NA	NA	NA	NA	NA	NA	NA	NA	NA	NA	NA	NA
TMEM200A	IGF2R	NA	NA	NA	NA	NA	NA	NA	NA	NA	NA	NA	NA	NA
TMEM217	IGFBP3	NA	NA	NA	NA	NA	NA	NA	NA	NA	NA	NA	NA	NA
TMEM9B	IGFBP7	NA	NA	NA	NA	NA	NA	NA	NA	NA	NA	NA	NA	NA
TNFAIP1	IL10RB	NA	NA	NA	NA	NA	NA	NA	NA	NA	NA	NA	NA	NA
TNFAIP3	IL13	NA	NA	NA	NA	NA	NA	NA	NA	NA	NA	NA	NA	NA
TNFRSF10B	IL1RAP	NA	NA	NA	NA	NA	NA	NA	NA	NA	NA	NA	NA	NA
TNFRSF10D	IL32	NA	NA	NA	NA	NA	NA	NA	NA	NA	NA	NA	NA	NA
TNFRSF9	IL6	NA	NA	NA	NA	NA	NA	NA	NA	NA	NA	NA	NA	NA
TNFSF18	INA	NA	NA	NA	NA	NA	NA	NA	NA	NA	NA	NA	NA	NA
TNFSF4	INF2	NA	NA	NA	NA	NA	NA	NA	NA	NA	NA	NA	NA	NA
TNIP1	INHBA	NA	NA	NA	NA	NA	NA	NA	NA	NA	NA	NA	NA	NA
TOB1	INHBB	NA	NA	NA	NA	NA	NA	NA	NA	NA	NA	NA	NA	NA
TOX2	INPP5A	NA	NA	NA	NA	NA	NA	NA	NA	NA	NA	NA	NA	NA
TP53INP1	INSC	NA	NA	NA	NA	NA	NA	NA	NA	NA	NA	NA	NA	NA
TPBG	INSIG2	NA	NA	NA	NA	NA	NA	NA	NA	NA	NA	NA	NA	NA
TPM1	INTU	NA	NA	NA	NA	NA	NA	NA	NA	NA	NA	NA	NA	NA
TPRG1L	IQSEC3	NA	NA	NA	NA	NA	NA	NA	NA	NA	NA	NA	NA	NA
TRAF1	IRS2	NA	NA	NA	NA	NA	NA	NA	NA	NA	NA	NA	NA	NA
TRAF4	ISCU	NA	NA	NA	NA	NA	NA	NA	NA	NA	NA	NA	NA	NA
TRAK1	ISG15	NA	NA	NA	NA	NA	NA	NA	NA	NA	NA	NA	NA	NA
TRAK2	ISM2	NA	NA	NA	NA	NA	NA	NA	NA	NA	NA	NA	NA	NA
TRIM22	ITFG1	NA	NA	NA	NA	NA	NA	NA	NA	NA	NA	NA	NA	NA
TRIM55	ITGA11	NA	NA	NA	NA	NA	NA	NA	NA	NA	NA	NA	NA	NA
TRIML2	ITGA3	NA	NA	NA	NA	NA	NA	NA	NA	NA	NA	NA	NA	NA
TRPC1	ITGAV	NA	NA	NA	NA	NA	NA	NA	NA	NA	NA	NA	NA	NA
TRPC4	ITGB5	NA	NA	NA	NA	NA	NA	NA	NA	NA	NA	NA	NA	NA
TRPM4	ITGB6	NA	NA	NA	NA	NA	NA	NA	NA	NA	NA	NA	NA	NA
TRPV2	ITGBL1	NA	NA	NA	NA	NA	NA	NA	NA	NA	NA	NA	NA	NA
TSPAN13	ITM2B	NA	NA	NA	NA	NA	NA	NA	NA	NA	NA	NA	NA	NA
TSPAN14	ITPR2	NA	NA	NA	NA	NA	NA	NA	NA	NA	NA	NA	NA	NA
TSPAN9	ITPRIPL2	NA	NA	NA	NA	NA	NA	NA	NA	NA	NA	NA	NA	NA
TSPYL6	IVL	NA	NA	NA	NA	NA	NA	NA	NA	NA	NA	NA	NA	NA
TTC3	JAG2	NA	NA	NA	NA	NA	NA	NA	NA	NA	NA	NA	NA	NA
TUBB2A	JKAMP	NA	NA	NA	NA	NA	NA	NA	NA	NA	NA	NA	NA	NA
TUBB2B	JPH2	NA	NA	NA	NA	NA	NA	NA	NA	NA	NA	NA	NA	NA
UBL3	JUP	NA	NA	NA	NA	NA	NA	NA	NA	NA	NA	NA	NA	NA
UCHL1	KATNAL1	NA	NA	NA	NA	NA	NA	NA	NA	NA	NA	NA	NA	NA
UFM1	KCNA10	NA	NA	NA	NA	NA	NA	NA	NA	NA	NA	NA	NA	NA
ULBP1	KCNAB2	NA	NA	NA	NA	NA	NA	NA	NA	NA	NA	NA	NA	NA
UNC13B	KCNC4	NA	NA	NA	NA	NA	NA	NA	NA	NA	NA	NA	NA	NA
USP53	KCNH1	NA	NA	NA	NA	NA	NA	NA	NA	NA	NA	NA	NA	NA
VAMP2	KCNH4	NA	NA	NA	NA	NA	NA	NA	NA	NA	NA	NA	NA	NA
VAT1	KCNH6	NA	NA	NA	NA	NA	NA	NA	NA	NA	NA	NA	NA	NA
VEPH1	KCNJ10	NA	NA	NA	NA	NA	NA	NA	NA	NA	NA	NA	NA	NA
VGLL3	KCNJ2	NA	NA	NA	NA	NA	NA	NA	NA	NA	NA	NA	NA	NA
WDR26	KCNK12	NA	NA	NA	NA	NA	NA	NA	NA	NA	NA	NA	NA	NA
WDR41	KCNK6	NA	NA	NA	NA	NA	NA	NA	NA	NA	NA	NA	NA	NA
WDR63	KCNMB4	NA	NA	NA	NA	NA	NA	NA	NA	NA	NA	NA	NA	NA
WDR66	KCNN2	NA	NA	NA	NA	NA	NA	NA	NA	NA	NA	NA	NA	NA
WIPI1	KCNQ3	NA	NA	NA	NA	NA	NA	NA	NA	NA	NA	NA	NA	NA
WNT16	KCTD11	NA	NA	NA	NA	NA	NA	NA	NA	NA	NA	NA	NA	NA
WNT5A	KCTD16	NA	NA	NA	NA	NA	NA	NA	NA	NA	NA	NA	NA	NA
WNT5B	KCTD20	NA	NA	NA	NA	NA	NA	NA	NA	NA	NA	NA	NA	NA
XDH	KCTD4	NA	NA	NA	NA	NA	NA	NA	NA	NA	NA	NA	NA	NA
YPEL2	KCTD9	NA	NA	NA	NA	NA	NA	NA	NA	NA	NA	NA	NA	NA
ZBTB46	KDELR3	NA	NA	NA	NA	NA	NA	NA	NA	NA	NA	NA	NA	NA
ZC3HAV1L	KDM4B	NA	NA	NA	NA	NA	NA	NA	NA	NA	NA	NA	NA	NA
ZDHHC24	KDM4C	NA	NA	NA	NA	NA	NA	NA	NA	NA	NA	NA	NA	NA
ZDHHC5	KIAA0319L	NA	NA	NA	NA	NA	NA	NA	NA	NA	NA	NA	NA	NA
ZFC3H1	KIAA1191	NA	NA	NA	NA	NA	NA	NA	NA	NA	NA	NA	NA	NA
ZFHX2	KIAA1324	NA	NA	NA	NA	NA	NA	NA	NA	NA	NA	NA	NA	NA
ZMAT3	KIF1C	NA	NA	NA	NA	NA	NA	NA	NA	NA	NA	NA	NA	NA
ZNF264	KIF26B	NA	NA	NA	NA	NA	NA	NA	NA	NA	NA	NA	NA	NA
ZNF432	KIF5A	NA	NA	NA	NA	NA	NA	NA	NA	NA	NA	NA	NA	NA
ZNF583	KIFC2	NA	NA	NA	NA	NA	NA	NA	NA	NA	NA	NA	NA	NA
ZNF622	KIRREL3	NA	NA	NA	NA	NA	NA	NA	NA	NA	NA	NA	NA	NA
ZNF654	KISS1	NA	NA	NA	NA	NA	NA	NA	NA	NA	NA	NA	NA	NA
ZNF699	KIT	NA	NA	NA	NA	NA	NA	NA	NA	NA	NA	NA	NA	NA
ZNF805	KL	NA	NA	NA	NA	NA	NA	NA	NA	NA	NA	NA	NA	NA
ZNF841	KLC1	NA	NA	NA	NA	NA	NA	NA	NA	NA	NA	NA	NA	NA
ZNFX1	KLF11	NA	NA	NA	NA	NA	NA	NA	NA	NA	NA	NA	NA	NA
ZSWIM4	KLF14	NA	NA	NA	NA	NA	NA	NA	NA	NA	NA	NA	NA	NA
NA	KLF7	NA	NA	NA	NA	NA	NA	NA	NA	NA	NA	NA	NA	NA
NA	KLF8	NA	NA	NA	NA	NA	NA	NA	NA	NA	NA	NA	NA	NA
NA	KLHDC1	NA	NA	NA	NA	NA	NA	NA	NA	NA	NA	NA	NA	NA
NA	KLHL24	NA	NA	NA	NA	NA	NA	NA	NA	NA	NA	NA	NA	NA
NA	KLHL3	NA	NA	NA	NA	NA	NA	NA	NA	NA	NA	NA	NA	NA
NA	KLHL30	NA	NA	NA	NA	NA	NA	NA	NA	NA	NA	NA	NA	NA
NA	KLHL35	NA	NA	NA	NA	NA	NA	NA	NA	NA	NA	NA	NA	NA
NA	KLHL36	NA	NA	NA	NA	NA	NA	NA	NA	NA	NA	NA	NA	NA
NA	KRT15	NA	NA	NA	NA	NA	NA	NA	NA	NA	NA	NA	NA	NA
NA	KRT17	NA	NA	NA	NA	NA	NA	NA	NA	NA	NA	NA	NA	NA
NA	KRT18	NA	NA	NA	NA	NA	NA	NA	NA	NA	NA	NA	NA	NA
NA	KRT8	NA	NA	NA	NA	NA	NA	NA	NA	NA	NA	NA	NA	NA
NA	KRTAP4-2	NA	NA	NA	NA	NA	NA	NA	NA	NA	NA	NA	NA	NA
NA	KRTAP4-4	NA	NA	NA	NA	NA	NA	NA	NA	NA	NA	NA	NA	NA
NA	KRTAP5-7	NA	NA	NA	NA	NA	NA	NA	NA	NA	NA	NA	NA	NA
NA	KRTAP5-8	NA	NA	NA	NA	NA	NA	NA	NA	NA	NA	NA	NA	NA
NA	L1CAM	NA	NA	NA	NA	NA	NA	NA	NA	NA	NA	NA	NA	NA
NA	LAMA1	NA	NA	NA	NA	NA	NA	NA	NA	NA	NA	NA	NA	NA
NA	LAMB1	NA	NA	NA	NA	NA	NA	NA	NA	NA	NA	NA	NA	NA
NA	LAMB2	NA	NA	NA	NA	NA	NA	NA	NA	NA	NA	NA	NA	NA
NA	LAMC1	NA	NA	NA	NA	NA	NA	NA	NA	NA	NA	NA	NA	NA
NA	LAMC2	NA	NA	NA	NA	NA	NA	NA	NA	NA	NA	NA	NA	NA
NA	LAMP2	NA	NA	NA	NA	NA	NA	NA	NA	NA	NA	NA	NA	NA
NA	LATS2	NA	NA	NA	NA	NA	NA	NA	NA	NA	NA	NA	NA	NA
NA	LCE2A	NA	NA	NA	NA	NA	NA	NA	NA	NA	NA	NA	NA	NA
NA	LCE2B	NA	NA	NA	NA	NA	NA	NA	NA	NA	NA	NA	NA	NA
NA	LCE2C	NA	NA	NA	NA	NA	NA	NA	NA	NA	NA	NA	NA	NA
NA	LCE2D	NA	NA	NA	NA	NA	NA	NA	NA	NA	NA	NA	NA	NA
NA	LCE3B	NA	NA	NA	NA	NA	NA	NA	NA	NA	NA	NA	NA	NA
NA	LCN1	NA	NA	NA	NA	NA	NA	NA	NA	NA	NA	NA	NA	NA
NA	LDOC1	NA	NA	NA	NA	NA	NA	NA	NA	NA	NA	NA	NA	NA
NA	LEP	NA	NA	NA	NA	NA	NA	NA	NA	NA	NA	NA	NA	NA
NA	LGMN	NA	NA	NA	NA	NA	NA	NA	NA	NA	NA	NA	NA	NA
NA	LGR4	NA	NA	NA	NA	NA	NA	NA	NA	NA	NA	NA	NA	NA
NA	LILRA5	NA	NA	NA	NA	NA	NA	NA	NA	NA	NA	NA	NA	NA
NA	LIMCH1	NA	NA	NA	NA	NA	NA	NA	NA	NA	NA	NA	NA	NA
NA	LIMK2	NA	NA	NA	NA	NA	NA	NA	NA	NA	NA	NA	NA	NA
NA	LIMS1	NA	NA	NA	NA	NA	NA	NA	NA	NA	NA	NA	NA	NA
NA	LIMS2	NA	NA	NA	NA	NA	NA	NA	NA	NA	NA	NA	NA	NA
NA	LIN7B	NA	NA	NA	NA	NA	NA	NA	NA	NA	NA	NA	NA	NA
NA	LINGO3	NA	NA	NA	NA	NA	NA	NA	NA	NA	NA	NA	NA	NA
NA	LIPG	NA	NA	NA	NA	NA	NA	NA	NA	NA	NA	NA	NA	NA
NA	LIPH	NA	NA	NA	NA	NA	NA	NA	NA	NA	NA	NA	NA	NA
NA	LMBRD1	NA	NA	NA	NA	NA	NA	NA	NA	NA	NA	NA	NA	NA
NA	LMBRD2	NA	NA	NA	NA	NA	NA	NA	NA	NA	NA	NA	NA	NA
NA	LMF1	NA	NA	NA	NA	NA	NA	NA	NA	NA	NA	NA	NA	NA
NA	LMLN	NA	NA	NA	NA	NA	NA	NA	NA	NA	NA	NA	NA	NA
NA	LMO7	NA	NA	NA	NA	NA	NA	NA	NA	NA	NA	NA	NA	NA
NA	LNPEP	NA	NA	NA	NA	NA	NA	NA	NA	NA	NA	NA	NA	NA
NA	LOC389834	NA	NA	NA	NA	NA	NA	NA	NA	NA	NA	NA	NA	NA
NA	LOX	NA	NA	NA	NA	NA	NA	NA	NA	NA	NA	NA	NA	NA
NA	LOXL4	NA	NA	NA	NA	NA	NA	NA	NA	NA	NA	NA	NA	NA
NA	LPCAT2	NA	NA	NA	NA	NA	NA	NA	NA	NA	NA	NA	NA	NA
NA	LPXN	NA	NA	NA	NA	NA	NA	NA	NA	NA	NA	NA	NA	NA
NA	LRP10	NA	NA	NA	NA	NA	NA	NA	NA	NA	NA	NA	NA	NA
NA	LRP12	NA	NA	NA	NA	NA	NA	NA	NA	NA	NA	NA	NA	NA
NA	LRRC1	NA	NA	NA	NA	NA	NA	NA	NA	NA	NA	NA	NA	NA
NA	LRRC17	NA	NA	NA	NA	NA	NA	NA	NA	NA	NA	NA	NA	NA
NA	LRRFIP1	NA	NA	NA	NA	NA	NA	NA	NA	NA	NA	NA	NA	NA
NA	LRRN3	NA	NA	NA	NA	NA	NA	NA	NA	NA	NA	NA	NA	NA
NA	LTBP1	NA	NA	NA	NA	NA	NA	NA	NA	NA	NA	NA	NA	NA
NA	LTBP3	NA	NA	NA	NA	NA	NA	NA	NA	NA	NA	NA	NA	NA
NA	LUZP1	NA	NA	NA	NA	NA	NA	NA	NA	NA	NA	NA	NA	NA
NA	LY6H	NA	NA	NA	NA	NA	NA	NA	NA	NA	NA	NA	NA	NA
NA	LYN	NA	NA	NA	NA	NA	NA	NA	NA	NA	NA	NA	NA	NA
NA	LYNX1	NA	NA	NA	NA	NA	NA	NA	NA	NA	NA	NA	NA	NA
NA	LYPD2	NA	NA	NA	NA	NA	NA	NA	NA	NA	NA	NA	NA	NA
NA	LYSMD3	NA	NA	NA	NA	NA	NA	NA	NA	NA	NA	NA	NA	NA
NA	MAB21L1	NA	NA	NA	NA	NA	NA	NA	NA	NA	NA	NA	NA	NA
NA	MACF1	NA	NA	NA	NA	NA	NA	NA	NA	NA	NA	NA	NA	NA
NA	MAFF	NA	NA	NA	NA	NA	NA	NA	NA	NA	NA	NA	NA	NA
NA	MAFK	NA	NA	NA	NA	NA	NA	NA	NA	NA	NA	NA	NA	NA
NA	MAGI1	NA	NA	NA	NA	NA	NA	NA	NA	NA	NA	NA	NA	NA
NA	MAMDC2	NA	NA	NA	NA	NA	NA	NA	NA	NA	NA	NA	NA	NA
NA	MAML3	NA	NA	NA	NA	NA	NA	NA	NA	NA	NA	NA	NA	NA
NA	MAN1B1	NA	NA	NA	NA	NA	NA	NA	NA	NA	NA	NA	NA	NA
NA	MAN2A1	NA	NA	NA	NA	NA	NA	NA	NA	NA	NA	NA	NA	NA
NA	MAN2B2	NA	NA	NA	NA	NA	NA	NA	NA	NA	NA	NA	NA	NA
NA	MANBA	NA	NA	NA	NA	NA	NA	NA	NA	NA	NA	NA	NA	NA
NA	MAP1LC3A	NA	NA	NA	NA	NA	NA	NA	NA	NA	NA	NA	NA	NA
NA	MAP3K10	NA	NA	NA	NA	NA	NA	NA	NA	NA	NA	NA	NA	NA
NA	MAP3K13	NA	NA	NA	NA	NA	NA	NA	NA	NA	NA	NA	NA	NA
NA	MAP4K3	NA	NA	NA	NA	NA	NA	NA	NA	NA	NA	NA	NA	NA
NA	MAP6	NA	NA	NA	NA	NA	NA	NA	NA	NA	NA	NA	NA	NA
NA	MAPK11	NA	NA	NA	NA	NA	NA	NA	NA	NA	NA	NA	NA	NA
NA	MAPK12	NA	NA	NA	NA	NA	NA	NA	NA	NA	NA	NA	NA	NA
NA	MAPK3	NA	NA	NA	NA	NA	NA	NA	NA	NA	NA	NA	NA	NA
NA	MAPK8IP3	NA	NA	NA	NA	NA	NA	NA	NA	NA	NA	NA	NA	NA
NA	MAPRE2	NA	NA	NA	NA	NA	NA	NA	NA	NA	NA	NA	NA	NA
NA	MAPRE3	NA	NA	NA	NA	NA	NA	NA	NA	NA	NA	NA	NA	NA
NA	MARK4	NA	NA	NA	NA	NA	NA	NA	NA	NA	NA	NA	NA	NA
NA	MAST4	NA	NA	NA	NA	NA	NA	NA	NA	NA	NA	NA	NA	NA
NA	MBOAT7	NA	NA	NA	NA	NA	NA	NA	NA	NA	NA	NA	NA	NA
NA	MCFD2	NA	NA	NA	NA	NA	NA	NA	NA	NA	NA	NA	NA	NA
NA	MCOLN1	NA	NA	NA	NA	NA	NA	NA	NA	NA	NA	NA	NA	NA
NA	MCTP2	NA	NA	NA	NA	NA	NA	NA	NA	NA	NA	NA	NA	NA
NA	MDM2	NA	NA	NA	NA	NA	NA	NA	NA	NA	NA	NA	NA	NA
NA	MEGF6	NA	NA	NA	NA	NA	NA	NA	NA	NA	NA	NA	NA	NA
NA	MFAP2	NA	NA	NA	NA	NA	NA	NA	NA	NA	NA	NA	NA	NA
NA	MFAP3L	NA	NA	NA	NA	NA	NA	NA	NA	NA	NA	NA	NA	NA
NA	MFAP5	NA	NA	NA	NA	NA	NA	NA	NA	NA	NA	NA	NA	NA
NA	MFGE8	NA	NA	NA	NA	NA	NA	NA	NA	NA	NA	NA	NA	NA
NA	MFSD1	NA	NA	NA	NA	NA	NA	NA	NA	NA	NA	NA	NA	NA
NA	MFSD3	NA	NA	NA	NA	NA	NA	NA	NA	NA	NA	NA	NA	NA
NA	MGAT5	NA	NA	NA	NA	NA	NA	NA	NA	NA	NA	NA	NA	NA
NA	MGLL	NA	NA	NA	NA	NA	NA	NA	NA	NA	NA	NA	NA	NA
NA	MGP	NA	NA	NA	NA	NA	NA	NA	NA	NA	NA	NA	NA	NA
NA	MGST2	NA	NA	NA	NA	NA	NA	NA	NA	NA	NA	NA	NA	NA
NA	MICA	NA	NA	NA	NA	NA	NA	NA	NA	NA	NA	NA	NA	NA
NA	MICALCL	NA	NA	NA	NA	NA	NA	NA	NA	NA	NA	NA	NA	NA
NA	MINK1	NA	NA	NA	NA	NA	NA	NA	NA	NA	NA	NA	NA	NA
NA	MLKL	NA	NA	NA	NA	NA	NA	NA	NA	NA	NA	NA	NA	NA
NA	MLLT11	NA	NA	NA	NA	NA	NA	NA	NA	NA	NA	NA	NA	NA
NA	MMP10	NA	NA	NA	NA	NA	NA	NA	NA	NA	NA	NA	NA	NA
NA	MMP12	NA	NA	NA	NA	NA	NA	NA	NA	NA	NA	NA	NA	NA
NA	MMP24	NA	NA	NA	NA	NA	NA	NA	NA	NA	NA	NA	NA	NA
NA	MMP3	NA	NA	NA	NA	NA	NA	NA	NA	NA	NA	NA	NA	NA
NA	MMP9	NA	NA	NA	NA	NA	NA	NA	NA	NA	NA	NA	NA	NA
NA	MOAP1	NA	NA	NA	NA	NA	NA	NA	NA	NA	NA	NA	NA	NA
NA	MOG	NA	NA	NA	NA	NA	NA	NA	NA	NA	NA	NA	NA	NA
NA	MOGS	NA	NA	NA	NA	NA	NA	NA	NA	NA	NA	NA	NA	NA
NA	MORC4	NA	NA	NA	NA	NA	NA	NA	NA	NA	NA	NA	NA	NA
NA	MPP2	NA	NA	NA	NA	NA	NA	NA	NA	NA	NA	NA	NA	NA
NA	MPP4	NA	NA	NA	NA	NA	NA	NA	NA	NA	NA	NA	NA	NA
NA	MPZL1	NA	NA	NA	NA	NA	NA	NA	NA	NA	NA	NA	NA	NA
NA	MPZL3	NA	NA	NA	NA	NA	NA	NA	NA	NA	NA	NA	NA	NA
NA	MR1	NA	NA	NA	NA	NA	NA	NA	NA	NA	NA	NA	NA	NA
NA	MRAS	NA	NA	NA	NA	NA	NA	NA	NA	NA	NA	NA	NA	NA
NA	MRC2	NA	NA	NA	NA	NA	NA	NA	NA	NA	NA	NA	NA	NA
NA	MRGPRX1	NA	NA	NA	NA	NA	NA	NA	NA	NA	NA	NA	NA	NA
NA	MRGPRX3	NA	NA	NA	NA	NA	NA	NA	NA	NA	NA	NA	NA	NA
NA	MRGPRX4	NA	NA	NA	NA	NA	NA	NA	NA	NA	NA	NA	NA	NA
NA	MRS2	NA	NA	NA	NA	NA	NA	NA	NA	NA	NA	NA	NA	NA
NA	MSI2	NA	NA	NA	NA	NA	NA	NA	NA	NA	NA	NA	NA	NA
NA	MSRB3	NA	NA	NA	NA	NA	NA	NA	NA	NA	NA	NA	NA	NA
NA	MT1X	NA	NA	NA	NA	NA	NA	NA	NA	NA	NA	NA	NA	NA
NA	MTNR1B	NA	NA	NA	NA	NA	NA	NA	NA	NA	NA	NA	NA	NA
NA	MTSS1	NA	NA	NA	NA	NA	NA	NA	NA	NA	NA	NA	NA	NA
NA	MUC1	NA	NA	NA	NA	NA	NA	NA	NA	NA	NA	NA	NA	NA
NA	MUC20	NA	NA	NA	NA	NA	NA	NA	NA	NA	NA	NA	NA	NA
NA	MVP	NA	NA	NA	NA	NA	NA	NA	NA	NA	NA	NA	NA	NA
NA	MXD1	NA	NA	NA	NA	NA	NA	NA	NA	NA	NA	NA	NA	NA
NA	MXI1	NA	NA	NA	NA	NA	NA	NA	NA	NA	NA	NA	NA	NA
NA	MXRA5	NA	NA	NA	NA	NA	NA	NA	NA	NA	NA	NA	NA	NA
NA	MXRA7	NA	NA	NA	NA	NA	NA	NA	NA	NA	NA	NA	NA	NA
NA	MYCT1	NA	NA	NA	NA	NA	NA	NA	NA	NA	NA	NA	NA	NA
NA	MYL12A	NA	NA	NA	NA	NA	NA	NA	NA	NA	NA	NA	NA	NA
NA	MYO1D	NA	NA	NA	NA	NA	NA	NA	NA	NA	NA	NA	NA	NA
NA	MYO1E	NA	NA	NA	NA	NA	NA	NA	NA	NA	NA	NA	NA	NA
NA	MYO6	NA	NA	NA	NA	NA	NA	NA	NA	NA	NA	NA	NA	NA
NA	MYOZ1	NA	NA	NA	NA	NA	NA	NA	NA	NA	NA	NA	NA	NA
NA	MYOZ2	NA	NA	NA	NA	NA	NA	NA	NA	NA	NA	NA	NA	NA
NA	NAAA	NA	NA	NA	NA	NA	NA	NA	NA	NA	NA	NA	NA	NA
NA	NAALADL2	NA	NA	NA	NA	NA	NA	NA	NA	NA	NA	NA	NA	NA
NA	NADSYN1	NA	NA	NA	NA	NA	NA	NA	NA	NA	NA	NA	NA	NA
NA	NALCN	NA	NA	NA	NA	NA	NA	NA	NA	NA	NA	NA	NA	NA
NA	NAP1L3	NA	NA	NA	NA	NA	NA	NA	NA	NA	NA	NA	NA	NA
NA	NAP1L5	NA	NA	NA	NA	NA	NA	NA	NA	NA	NA	NA	NA	NA
NA	NAPB	NA	NA	NA	NA	NA	NA	NA	NA	NA	NA	NA	NA	NA
NA	NAV1	NA	NA	NA	NA	NA	NA	NA	NA	NA	NA	NA	NA	NA
NA	NBEAL1	NA	NA	NA	NA	NA	NA	NA	NA	NA	NA	NA	NA	NA
NA	NCF2	NA	NA	NA	NA	NA	NA	NA	NA	NA	NA	NA	NA	NA
NA	NCKAP5L	NA	NA	NA	NA	NA	NA	NA	NA	NA	NA	NA	NA	NA
NA	NCOA3	NA	NA	NA	NA	NA	NA	NA	NA	NA	NA	NA	NA	NA
NA	NCOA7	NA	NA	NA	NA	NA	NA	NA	NA	NA	NA	NA	NA	NA
NA	NDEL1	NA	NA	NA	NA	NA	NA	NA	NA	NA	NA	NA	NA	NA
NA	NDFIP1	NA	NA	NA	NA	NA	NA	NA	NA	NA	NA	NA	NA	NA
NA	NDFIP2	NA	NA	NA	NA	NA	NA	NA	NA	NA	NA	NA	NA	NA
NA	NDST1	NA	NA	NA	NA	NA	NA	NA	NA	NA	NA	NA	NA	NA
NA	NDUFA1	NA	NA	NA	NA	NA	NA	NA	NA	NA	NA	NA	NA	NA
NA	NDUFC1	NA	NA	NA	NA	NA	NA	NA	NA	NA	NA	NA	NA	NA
NA	NEDD4L	NA	NA	NA	NA	NA	NA	NA	NA	NA	NA	NA	NA	NA
NA	NEDD9	NA	NA	NA	NA	NA	NA	NA	NA	NA	NA	NA	NA	NA
NA	NEGR1	NA	NA	NA	NA	NA	NA	NA	NA	NA	NA	NA	NA	NA
NA	NEO1	NA	NA	NA	NA	NA	NA	NA	NA	NA	NA	NA	NA	NA
NA	NEURL3	NA	NA	NA	NA	NA	NA	NA	NA	NA	NA	NA	NA	NA
NA	NEXN	NA	NA	NA	NA	NA	NA	NA	NA	NA	NA	NA	NA	NA
NA	NFAT5	NA	NA	NA	NA	NA	NA	NA	NA	NA	NA	NA	NA	NA
NA	NFE2L1	NA	NA	NA	NA	NA	NA	NA	NA	NA	NA	NA	NA	NA
NA	NFE2L3	NA	NA	NA	NA	NA	NA	NA	NA	NA	NA	NA	NA	NA
NA	NFKBIZ	NA	NA	NA	NA	NA	NA	NA	NA	NA	NA	NA	NA	NA
NA	NIPAL1	NA	NA	NA	NA	NA	NA	NA	NA	NA	NA	NA	NA	NA
NA	NIPAL2	NA	NA	NA	NA	NA	NA	NA	NA	NA	NA	NA	NA	NA
NA	NIPAL3	NA	NA	NA	NA	NA	NA	NA	NA	NA	NA	NA	NA	NA
NA	NIPSNAP3A	NA	NA	NA	NA	NA	NA	NA	NA	NA	NA	NA	NA	NA
NA	NKIRAS2	NA	NA	NA	NA	NA	NA	NA	NA	NA	NA	NA	NA	NA
NA	NKX2-5	NA	NA	NA	NA	NA	NA	NA	NA	NA	NA	NA	NA	NA
NA	NKX3-1	NA	NA	NA	NA	NA	NA	NA	NA	NA	NA	NA	NA	NA
NA	NLRP10	NA	NA	NA	NA	NA	NA	NA	NA	NA	NA	NA	NA	NA
NA	NLRP6	NA	NA	NA	NA	NA	NA	NA	NA	NA	NA	NA	NA	NA
NA	NLRX1	NA	NA	NA	NA	NA	NA	NA	NA	NA	NA	NA	NA	NA
NA	NME3	NA	NA	NA	NA	NA	NA	NA	NA	NA	NA	NA	NA	NA
NA	NMNAT2	NA	NA	NA	NA	NA	NA	NA	NA	NA	NA	NA	NA	NA
NA	NOG	NA	NA	NA	NA	NA	NA	NA	NA	NA	NA	NA	NA	NA
NA	NOS1AP	NA	NA	NA	NA	NA	NA	NA	NA	NA	NA	NA	NA	NA
NA	NOSTRIN	NA	NA	NA	NA	NA	NA	NA	NA	NA	NA	NA	NA	NA
NA	NOTCH3	NA	NA	NA	NA	NA	NA	NA	NA	NA	NA	NA	NA	NA
NA	NOX1	NA	NA	NA	NA	NA	NA	NA	NA	NA	NA	NA	NA	NA
NA	NOX4	NA	NA	NA	NA	NA	NA	NA	NA	NA	NA	NA	NA	NA
NA	NOXA1	NA	NA	NA	NA	NA	NA	NA	NA	NA	NA	NA	NA	NA
NA	NPAS1	NA	NA	NA	NA	NA	NA	NA	NA	NA	NA	NA	NA	NA
NA	NPAS2	NA	NA	NA	NA	NA	NA	NA	NA	NA	NA	NA	NA	NA
NA	NPC1L1	NA	NA	NA	NA	NA	NA	NA	NA	NA	NA	NA	NA	NA
NA	NPDC1	NA	NA	NA	NA	NA	NA	NA	NA	NA	NA	NA	NA	NA
NA	NPL	NA	NA	NA	NA	NA	NA	NA	NA	NA	NA	NA	NA	NA
NA	NPPB	NA	NA	NA	NA	NA	NA	NA	NA	NA	NA	NA	NA	NA
NA	NPPC	NA	NA	NA	NA	NA	NA	NA	NA	NA	NA	NA	NA	NA
NA	NPR2	NA	NA	NA	NA	NA	NA	NA	NA	NA	NA	NA	NA	NA
NA	NR1H2	NA	NA	NA	NA	NA	NA	NA	NA	NA	NA	NA	NA	NA
NA	NRBP2	NA	NA	NA	NA	NA	NA	NA	NA	NA	NA	NA	NA	NA
NA	NRG1	NA	NA	NA	NA	NA	NA	NA	NA	NA	NA	NA	NA	NA
NA	NSF	NA	NA	NA	NA	NA	NA	NA	NA	NA	NA	NA	NA	NA
NA	NT5C2	NA	NA	NA	NA	NA	NA	NA	NA	NA	NA	NA	NA	NA
NA	NT5DC1	NA	NA	NA	NA	NA	NA	NA	NA	NA	NA	NA	NA	NA
NA	NTF3	NA	NA	NA	NA	NA	NA	NA	NA	NA	NA	NA	NA	NA
NA	NTM	NA	NA	NA	NA	NA	NA	NA	NA	NA	NA	NA	NA	NA
NA	NTNG2	NA	NA	NA	NA	NA	NA	NA	NA	NA	NA	NA	NA	NA
NA	NUAK1	NA	NA	NA	NA	NA	NA	NA	NA	NA	NA	NA	NA	NA
NA	NUDT18	NA	NA	NA	NA	NA	NA	NA	NA	NA	NA	NA	NA	NA
NA	NUDT22	NA	NA	NA	NA	NA	NA	NA	NA	NA	NA	NA	NA	NA
NA	NUMB	NA	NA	NA	NA	NA	NA	NA	NA	NA	NA	NA	NA	NA
NA	NXF3	NA	NA	NA	NA	NA	NA	NA	NA	NA	NA	NA	NA	NA
NA	NXPH3	NA	NA	NA	NA	NA	NA	NA	NA	NA	NA	NA	NA	NA
NA	NXPH4	NA	NA	NA	NA	NA	NA	NA	NA	NA	NA	NA	NA	NA
NA	OGFRL1	NA	NA	NA	NA	NA	NA	NA	NA	NA	NA	NA	NA	NA
NA	OPCML	NA	NA	NA	NA	NA	NA	NA	NA	NA	NA	NA	NA	NA
NA	OPHN1	NA	NA	NA	NA	NA	NA	NA	NA	NA	NA	NA	NA	NA
NA	OPRD1	NA	NA	NA	NA	NA	NA	NA	NA	NA	NA	NA	NA	NA
NA	OPRL1	NA	NA	NA	NA	NA	NA	NA	NA	NA	NA	NA	NA	NA
NA	OPTN	NA	NA	NA	NA	NA	NA	NA	NA	NA	NA	NA	NA	NA
NA	OR10A3	NA	NA	NA	NA	NA	NA	NA	NA	NA	NA	NA	NA	NA
NA	OR10Q1	NA	NA	NA	NA	NA	NA	NA	NA	NA	NA	NA	NA	NA
NA	OR1D2	NA	NA	NA	NA	NA	NA	NA	NA	NA	NA	NA	NA	NA
NA	OR1F1	NA	NA	NA	NA	NA	NA	NA	NA	NA	NA	NA	NA	NA
NA	OR1J4	NA	NA	NA	NA	NA	NA	NA	NA	NA	NA	NA	NA	NA
NA	OR1L8	NA	NA	NA	NA	NA	NA	NA	NA	NA	NA	NA	NA	NA
NA	OR1N2	NA	NA	NA	NA	NA	NA	NA	NA	NA	NA	NA	NA	NA
NA	OR1Q1	NA	NA	NA	NA	NA	NA	NA	NA	NA	NA	NA	NA	NA
NA	OR51E1	NA	NA	NA	NA	NA	NA	NA	NA	NA	NA	NA	NA	NA
NA	OR51M1	NA	NA	NA	NA	NA	NA	NA	NA	NA	NA	NA	NA	NA
NA	OR56A5	NA	NA	NA	NA	NA	NA	NA	NA	NA	NA	NA	NA	NA
NA	OR5B21	NA	NA	NA	NA	NA	NA	NA	NA	NA	NA	NA	NA	NA
NA	OR5P2	NA	NA	NA	NA	NA	NA	NA	NA	NA	NA	NA	NA	NA
NA	OR5P3	NA	NA	NA	NA	NA	NA	NA	NA	NA	NA	NA	NA	NA
NA	ORAI3	NA	NA	NA	NA	NA	NA	NA	NA	NA	NA	NA	NA	NA
NA	ORMDL3	NA	NA	NA	NA	NA	NA	NA	NA	NA	NA	NA	NA	NA
NA	OSBPL3	NA	NA	NA	NA	NA	NA	NA	NA	NA	NA	NA	NA	NA
NA	OSM	NA	NA	NA	NA	NA	NA	NA	NA	NA	NA	NA	NA	NA
NA	OSR2	NA	NA	NA	NA	NA	NA	NA	NA	NA	NA	NA	NA	NA
NA	OSTC	NA	NA	NA	NA	NA	NA	NA	NA	NA	NA	NA	NA	NA
NA	OSTM1	NA	NA	NA	NA	NA	NA	NA	NA	NA	NA	NA	NA	NA
NA	OTUB2	NA	NA	NA	NA	NA	NA	NA	NA	NA	NA	NA	NA	NA
NA	OVCH2	NA	NA	NA	NA	NA	NA	NA	NA	NA	NA	NA	NA	NA
NA	OVGP1	NA	NA	NA	NA	NA	NA	NA	NA	NA	NA	NA	NA	NA
NA	OXTR	NA	NA	NA	NA	NA	NA	NA	NA	NA	NA	NA	NA	NA
NA	P4HA1	NA	NA	NA	NA	NA	NA	NA	NA	NA	NA	NA	NA	NA
NA	P4HA2	NA	NA	NA	NA	NA	NA	NA	NA	NA	NA	NA	NA	NA
NA	P4HB	NA	NA	NA	NA	NA	NA	NA	NA	NA	NA	NA	NA	NA
NA	PACS1	NA	NA	NA	NA	NA	NA	NA	NA	NA	NA	NA	NA	NA
NA	PACS2	NA	NA	NA	NA	NA	NA	NA	NA	NA	NA	NA	NA	NA
NA	PAG1	NA	NA	NA	NA	NA	NA	NA	NA	NA	NA	NA	NA	NA
NA	PALMD	NA	NA	NA	NA	NA	NA	NA	NA	NA	NA	NA	NA	NA
NA	PAM	NA	NA	NA	NA	NA	NA	NA	NA	NA	NA	NA	NA	NA
NA	PAMR1	NA	NA	NA	NA	NA	NA	NA	NA	NA	NA	NA	NA	NA
NA	PAPPA	NA	NA	NA	NA	NA	NA	NA	NA	NA	NA	NA	NA	NA
NA	PAPPA2	NA	NA	NA	NA	NA	NA	NA	NA	NA	NA	NA	NA	NA
NA	PAPSS2	NA	NA	NA	NA	NA	NA	NA	NA	NA	NA	NA	NA	NA
NA	PAQR7	NA	NA	NA	NA	NA	NA	NA	NA	NA	NA	NA	NA	NA
NA	PARD6G	NA	NA	NA	NA	NA	NA	NA	NA	NA	NA	NA	NA	NA
NA	PAWR	NA	NA	NA	NA	NA	NA	NA	NA	NA	NA	NA	NA	NA
NA	PBLD	NA	NA	NA	NA	NA	NA	NA	NA	NA	NA	NA	NA	NA
NA	PBXIP1	NA	NA	NA	NA	NA	NA	NA	NA	NA	NA	NA	NA	NA
NA	PCBD1	NA	NA	NA	NA	NA	NA	NA	NA	NA	NA	NA	NA	NA
NA	PCDH1	NA	NA	NA	NA	NA	NA	NA	NA	NA	NA	NA	NA	NA
NA	PCDHA10	NA	NA	NA	NA	NA	NA	NA	NA	NA	NA	NA	NA	NA
NA	PCDHA13	NA	NA	NA	NA	NA	NA	NA	NA	NA	NA	NA	NA	NA
NA	PCDHA3	NA	NA	NA	NA	NA	NA	NA	NA	NA	NA	NA	NA	NA
NA	PCDHA4	NA	NA	NA	NA	NA	NA	NA	NA	NA	NA	NA	NA	NA
NA	PCDHA7	NA	NA	NA	NA	NA	NA	NA	NA	NA	NA	NA	NA	NA
NA	PCDHB10	NA	NA	NA	NA	NA	NA	NA	NA	NA	NA	NA	NA	NA
NA	PCDHB11	NA	NA	NA	NA	NA	NA	NA	NA	NA	NA	NA	NA	NA
NA	PCDHB12	NA	NA	NA	NA	NA	NA	NA	NA	NA	NA	NA	NA	NA
NA	PCDHB13	NA	NA	NA	NA	NA	NA	NA	NA	NA	NA	NA	NA	NA
NA	PCDHB14	NA	NA	NA	NA	NA	NA	NA	NA	NA	NA	NA	NA	NA
NA	PCDHB15	NA	NA	NA	NA	NA	NA	NA	NA	NA	NA	NA	NA	NA
NA	PCDHB16	NA	NA	NA	NA	NA	NA	NA	NA	NA	NA	NA	NA	NA
NA	PCDHB2	NA	NA	NA	NA	NA	NA	NA	NA	NA	NA	NA	NA	NA
NA	PCDHB5	NA	NA	NA	NA	NA	NA	NA	NA	NA	NA	NA	NA	NA
NA	PCDHB6	NA	NA	NA	NA	NA	NA	NA	NA	NA	NA	NA	NA	NA
NA	PCDHB8	NA	NA	NA	NA	NA	NA	NA	NA	NA	NA	NA	NA	NA
NA	PCDHB9	NA	NA	NA	NA	NA	NA	NA	NA	NA	NA	NA	NA	NA
NA	PCMTD1	NA	NA	NA	NA	NA	NA	NA	NA	NA	NA	NA	NA	NA
NA	PCSK5	NA	NA	NA	NA	NA	NA	NA	NA	NA	NA	NA	NA	NA
NA	PCSK7	NA	NA	NA	NA	NA	NA	NA	NA	NA	NA	NA	NA	NA
NA	PCYOX1	NA	NA	NA	NA	NA	NA	NA	NA	NA	NA	NA	NA	NA
NA	PCYT1A	NA	NA	NA	NA	NA	NA	NA	NA	NA	NA	NA	NA	NA
NA	PDCD1LG2	NA	NA	NA	NA	NA	NA	NA	NA	NA	NA	NA	NA	NA
NA	PDCD4	NA	NA	NA	NA	NA	NA	NA	NA	NA	NA	NA	NA	NA
NA	PDE11A	NA	NA	NA	NA	NA	NA	NA	NA	NA	NA	NA	NA	NA
NA	PDE1C	NA	NA	NA	NA	NA	NA	NA	NA	NA	NA	NA	NA	NA
NA	PDE8B	NA	NA	NA	NA	NA	NA	NA	NA	NA	NA	NA	NA	NA
NA	PDGFB	NA	NA	NA	NA	NA	NA	NA	NA	NA	NA	NA	NA	NA
NA	PDK4	NA	NA	NA	NA	NA	NA	NA	NA	NA	NA	NA	NA	NA
NA	PDLIM2	NA	NA	NA	NA	NA	NA	NA	NA	NA	NA	NA	NA	NA
NA	PDLIM5	NA	NA	NA	NA	NA	NA	NA	NA	NA	NA	NA	NA	NA
NA	PDZD7	NA	NA	NA	NA	NA	NA	NA	NA	NA	NA	NA	NA	NA
NA	PEA15	NA	NA	NA	NA	NA	NA	NA	NA	NA	NA	NA	NA	NA
NA	PEBP4	NA	NA	NA	NA	NA	NA	NA	NA	NA	NA	NA	NA	NA
NA	PERP	NA	NA	NA	NA	NA	NA	NA	NA	NA	NA	NA	NA	NA
NA	PFKFB2	NA	NA	NA	NA	NA	NA	NA	NA	NA	NA	NA	NA	NA
NA	PFKFB3	NA	NA	NA	NA	NA	NA	NA	NA	NA	NA	NA	NA	NA
NA	PFKFB4	NA	NA	NA	NA	NA	NA	NA	NA	NA	NA	NA	NA	NA
NA	PGC	NA	NA	NA	NA	NA	NA	NA	NA	NA	NA	NA	NA	NA
NA	PGM2L1	NA	NA	NA	NA	NA	NA	NA	NA	NA	NA	NA	NA	NA
NA	PGM5	NA	NA	NA	NA	NA	NA	NA	NA	NA	NA	NA	NA	NA
NA	PGRMC1	NA	NA	NA	NA	NA	NA	NA	NA	NA	NA	NA	NA	NA
NA	PGRMC2	NA	NA	NA	NA	NA	NA	NA	NA	NA	NA	NA	NA	NA
NA	PHACTR2	NA	NA	NA	NA	NA	NA	NA	NA	NA	NA	NA	NA	NA
NA	PHEX	NA	NA	NA	NA	NA	NA	NA	NA	NA	NA	NA	NA	NA
NA	PHKA1	NA	NA	NA	NA	NA	NA	NA	NA	NA	NA	NA	NA	NA
NA	PHLDA3	NA	NA	NA	NA	NA	NA	NA	NA	NA	NA	NA	NA	NA
NA	PHLDB1	NA	NA	NA	NA	NA	NA	NA	NA	NA	NA	NA	NA	NA
NA	PHLDB3	NA	NA	NA	NA	NA	NA	NA	NA	NA	NA	NA	NA	NA
NA	PI16	NA	NA	NA	NA	NA	NA	NA	NA	NA	NA	NA	NA	NA
NA	PI3	NA	NA	NA	NA	NA	NA	NA	NA	NA	NA	NA	NA	NA
NA	PICALM	NA	NA	NA	NA	NA	NA	NA	NA	NA	NA	NA	NA	NA
NA	PIGV	NA	NA	NA	NA	NA	NA	NA	NA	NA	NA	NA	NA	NA
NA	PIGZ	NA	NA	NA	NA	NA	NA	NA	NA	NA	NA	NA	NA	NA
NA	PIK3AP1	NA	NA	NA	NA	NA	NA	NA	NA	NA	NA	NA	NA	NA
NA	PIK3C3	NA	NA	NA	NA	NA	NA	NA	NA	NA	NA	NA	NA	NA
NA	PIK3CA	NA	NA	NA	NA	NA	NA	NA	NA	NA	NA	NA	NA	NA
NA	PIK3IP1	NA	NA	NA	NA	NA	NA	NA	NA	NA	NA	NA	NA	NA
NA	PIP4K2C	NA	NA	NA	NA	NA	NA	NA	NA	NA	NA	NA	NA	NA
NA	PIP5KL1	NA	NA	NA	NA	NA	NA	NA	NA	NA	NA	NA	NA	NA
NA	PITPNM3	NA	NA	NA	NA	NA	NA	NA	NA	NA	NA	NA	NA	NA
NA	PKP2	NA	NA	NA	NA	NA	NA	NA	NA	NA	NA	NA	NA	NA
NA	PLA2G15	NA	NA	NA	NA	NA	NA	NA	NA	NA	NA	NA	NA	NA
NA	PLA2G16	NA	NA	NA	NA	NA	NA	NA	NA	NA	NA	NA	NA	NA
NA	PLA2G4C	NA	NA	NA	NA	NA	NA	NA	NA	NA	NA	NA	NA	NA
NA	PLA2R1	NA	NA	NA	NA	NA	NA	NA	NA	NA	NA	NA	NA	NA
NA	PLAT	NA	NA	NA	NA	NA	NA	NA	NA	NA	NA	NA	NA	NA
NA	PLBD2	NA	NA	NA	NA	NA	NA	NA	NA	NA	NA	NA	NA	NA
NA	PLCB4	NA	NA	NA	NA	NA	NA	NA	NA	NA	NA	NA	NA	NA
NA	PLCE1	NA	NA	NA	NA	NA	NA	NA	NA	NA	NA	NA	NA	NA
NA	PLD3	NA	NA	NA	NA	NA	NA	NA	NA	NA	NA	NA	NA	NA
NA	PLEKHA1	NA	NA	NA	NA	NA	NA	NA	NA	NA	NA	NA	NA	NA
NA	PLEKHB2	NA	NA	NA	NA	NA	NA	NA	NA	NA	NA	NA	NA	NA
NA	PLK3	NA	NA	NA	NA	NA	NA	NA	NA	NA	NA	NA	NA	NA
NA	PLOD1	NA	NA	NA	NA	NA	NA	NA	NA	NA	NA	NA	NA	NA
NA	PLOD2	NA	NA	NA	NA	NA	NA	NA	NA	NA	NA	NA	NA	NA
NA	PLSCR4	NA	NA	NA	NA	NA	NA	NA	NA	NA	NA	NA	NA	NA
NA	PLXDC2	NA	NA	NA	NA	NA	NA	NA	NA	NA	NA	NA	NA	NA
NA	PLXNA1	NA	NA	NA	NA	NA	NA	NA	NA	NA	NA	NA	NA	NA
NA	PLXNA2	NA	NA	NA	NA	NA	NA	NA	NA	NA	NA	NA	NA	NA
NA	PLXNA3	NA	NA	NA	NA	NA	NA	NA	NA	NA	NA	NA	NA	NA
NA	PLXNB3	NA	NA	NA	NA	NA	NA	NA	NA	NA	NA	NA	NA	NA
NA	PLXND1	NA	NA	NA	NA	NA	NA	NA	NA	NA	NA	NA	NA	NA
NA	PMAIP1	NA	NA	NA	NA	NA	NA	NA	NA	NA	NA	NA	NA	NA
NA	PMEPA1	NA	NA	NA	NA	NA	NA	NA	NA	NA	NA	NA	NA	NA
NA	PNPLA2	NA	NA	NA	NA	NA	NA	NA	NA	NA	NA	NA	NA	NA
NA	PNRC1	NA	NA	NA	NA	NA	NA	NA	NA	NA	NA	NA	NA	NA
NA	POLD4	NA	NA	NA	NA	NA	NA	NA	NA	NA	NA	NA	NA	NA
NA	POLH	NA	NA	NA	NA	NA	NA	NA	NA	NA	NA	NA	NA	NA
NA	POMT1	NA	NA	NA	NA	NA	NA	NA	NA	NA	NA	NA	NA	NA
NA	PON2	NA	NA	NA	NA	NA	NA	NA	NA	NA	NA	NA	NA	NA
NA	PORCN	NA	NA	NA	NA	NA	NA	NA	NA	NA	NA	NA	NA	NA
NA	POU2F2	NA	NA	NA	NA	NA	NA	NA	NA	NA	NA	NA	NA	NA
NA	PPFIA1	NA	NA	NA	NA	NA	NA	NA	NA	NA	NA	NA	NA	NA
NA	PPFIA4	NA	NA	NA	NA	NA	NA	NA	NA	NA	NA	NA	NA	NA
NA	PPFIBP1	NA	NA	NA	NA	NA	NA	NA	NA	NA	NA	NA	NA	NA
NA	PPFIBP2	NA	NA	NA	NA	NA	NA	NA	NA	NA	NA	NA	NA	NA
NA	PPIC	NA	NA	NA	NA	NA	NA	NA	NA	NA	NA	NA	NA	NA
NA	PPM1K	NA	NA	NA	NA	NA	NA	NA	NA	NA	NA	NA	NA	NA
NA	PPME1	NA	NA	NA	NA	NA	NA	NA	NA	NA	NA	NA	NA	NA
NA	PPP1R13L	NA	NA	NA	NA	NA	NA	NA	NA	NA	NA	NA	NA	NA
NA	PPP1R14A	NA	NA	NA	NA	NA	NA	NA	NA	NA	NA	NA	NA	NA
NA	PPP1R16A	NA	NA	NA	NA	NA	NA	NA	NA	NA	NA	NA	NA	NA
NA	PPP1R2	NA	NA	NA	NA	NA	NA	NA	NA	NA	NA	NA	NA	NA
NA	PPP1R3C	NA	NA	NA	NA	NA	NA	NA	NA	NA	NA	NA	NA	NA
NA	PPP2R5B	NA	NA	NA	NA	NA	NA	NA	NA	NA	NA	NA	NA	NA
NA	PPP3CC	NA	NA	NA	NA	NA	NA	NA	NA	NA	NA	NA	NA	NA
NA	PPP4R4	NA	NA	NA	NA	NA	NA	NA	NA	NA	NA	NA	NA	NA
NA	PPP6R2	NA	NA	NA	NA	NA	NA	NA	NA	NA	NA	NA	NA	NA
NA	PRAF2	NA	NA	NA	NA	NA	NA	NA	NA	NA	NA	NA	NA	NA
NA	PRDM1	NA	NA	NA	NA	NA	NA	NA	NA	NA	NA	NA	NA	NA
NA	PRDX4	NA	NA	NA	NA	NA	NA	NA	NA	NA	NA	NA	NA	NA
NA	PRDX5	NA	NA	NA	NA	NA	NA	NA	NA	NA	NA	NA	NA	NA
NA	PRDX6	NA	NA	NA	NA	NA	NA	NA	NA	NA	NA	NA	NA	NA
NA	PRICKLE1	NA	NA	NA	NA	NA	NA	NA	NA	NA	NA	NA	NA	NA
NA	PRICKLE2	NA	NA	NA	NA	NA	NA	NA	NA	NA	NA	NA	NA	NA
NA	PRKAB2	NA	NA	NA	NA	NA	NA	NA	NA	NA	NA	NA	NA	NA
NA	PRKCH	NA	NA	NA	NA	NA	NA	NA	NA	NA	NA	NA	NA	NA
NA	PRLH	NA	NA	NA	NA	NA	NA	NA	NA	NA	NA	NA	NA	NA
NA	PRNP	NA	NA	NA	NA	NA	NA	NA	NA	NA	NA	NA	NA	NA
NA	PROK2	NA	NA	NA	NA	NA	NA	NA	NA	NA	NA	NA	NA	NA
NA	PROS1	NA	NA	NA	NA	NA	NA	NA	NA	NA	NA	NA	NA	NA
NA	PRPS1	NA	NA	NA	NA	NA	NA	NA	NA	NA	NA	NA	NA	NA
NA	PRR5L	NA	NA	NA	NA	NA	NA	NA	NA	NA	NA	NA	NA	NA
NA	PRRG1	NA	NA	NA	NA	NA	NA	NA	NA	NA	NA	NA	NA	NA
NA	PRSS23	NA	NA	NA	NA	NA	NA	NA	NA	NA	NA	NA	NA	NA
NA	PSAP	NA	NA	NA	NA	NA	NA	NA	NA	NA	NA	NA	NA	NA
NA	PSCA	NA	NA	NA	NA	NA	NA	NA	NA	NA	NA	NA	NA	NA
NA	PSD4	NA	NA	NA	NA	NA	NA	NA	NA	NA	NA	NA	NA	NA
NA	PSG1	NA	NA	NA	NA	NA	NA	NA	NA	NA	NA	NA	NA	NA
NA	PSG11	NA	NA	NA	NA	NA	NA	NA	NA	NA	NA	NA	NA	NA
NA	PSG2	NA	NA	NA	NA	NA	NA	NA	NA	NA	NA	NA	NA	NA
NA	PSG3	NA	NA	NA	NA	NA	NA	NA	NA	NA	NA	NA	NA	NA
NA	PSG9	NA	NA	NA	NA	NA	NA	NA	NA	NA	NA	NA	NA	NA
NA	PSPN	NA	NA	NA	NA	NA	NA	NA	NA	NA	NA	NA	NA	NA
NA	PSTPIP2	NA	NA	NA	NA	NA	NA	NA	NA	NA	NA	NA	NA	NA
NA	PTGFR	NA	NA	NA	NA	NA	NA	NA	NA	NA	NA	NA	NA	NA
NA	PTGFRN	NA	NA	NA	NA	NA	NA	NA	NA	NA	NA	NA	NA	NA
NA	PTGIR	NA	NA	NA	NA	NA	NA	NA	NA	NA	NA	NA	NA	NA
NA	PTGS2	NA	NA	NA	NA	NA	NA	NA	NA	NA	NA	NA	NA	NA
NA	PTHLH	NA	NA	NA	NA	NA	NA	NA	NA	NA	NA	NA	NA	NA
NA	PTP4A1	NA	NA	NA	NA	NA	NA	NA	NA	NA	NA	NA	NA	NA
NA	PTP4A3	NA	NA	NA	NA	NA	NA	NA	NA	NA	NA	NA	NA	NA
NA	PTPN13	NA	NA	NA	NA	NA	NA	NA	NA	NA	NA	NA	NA	NA
NA	PTPRB	NA	NA	NA	NA	NA	NA	NA	NA	NA	NA	NA	NA	NA
NA	PTPRE	NA	NA	NA	NA	NA	NA	NA	NA	NA	NA	NA	NA	NA
NA	PTPRF	NA	NA	NA	NA	NA	NA	NA	NA	NA	NA	NA	NA	NA
NA	PTPRK	NA	NA	NA	NA	NA	NA	NA	NA	NA	NA	NA	NA	NA
NA	PTPRM	NA	NA	NA	NA	NA	NA	NA	NA	NA	NA	NA	NA	NA
NA	PTPRU	NA	NA	NA	NA	NA	NA	NA	NA	NA	NA	NA	NA	NA
NA	PURA	NA	NA	NA	NA	NA	NA	NA	NA	NA	NA	NA	NA	NA
NA	PXDNL	NA	NA	NA	NA	NA	NA	NA	NA	NA	NA	NA	NA	NA
NA	PYGB	NA	NA	NA	NA	NA	NA	NA	NA	NA	NA	NA	NA	NA
NA	PYGL	NA	NA	NA	NA	NA	NA	NA	NA	NA	NA	NA	NA	NA
NA	QPCT	NA	NA	NA	NA	NA	NA	NA	NA	NA	NA	NA	NA	NA
NA	QPCTL	NA	NA	NA	NA	NA	NA	NA	NA	NA	NA	NA	NA	NA
NA	QPRT	NA	NA	NA	NA	NA	NA	NA	NA	NA	NA	NA	NA	NA
NA	RAB11A	NA	NA	NA	NA	NA	NA	NA	NA	NA	NA	NA	NA	NA
NA	RAB11FIP5	NA	NA	NA	NA	NA	NA	NA	NA	NA	NA	NA	NA	NA
NA	RAB26	NA	NA	NA	NA	NA	NA	NA	NA	NA	NA	NA	NA	NA
NA	RAB33B	NA	NA	NA	NA	NA	NA	NA	NA	NA	NA	NA	NA	NA
NA	RAB3A	NA	NA	NA	NA	NA	NA	NA	NA	NA	NA	NA	NA	NA
NA	RAB40B	NA	NA	NA	NA	NA	NA	NA	NA	NA	NA	NA	NA	NA
NA	RAB5A	NA	NA	NA	NA	NA	NA	NA	NA	NA	NA	NA	NA	NA
NA	RAB6B	NA	NA	NA	NA	NA	NA	NA	NA	NA	NA	NA	NA	NA
NA	RABGAP1L	NA	NA	NA	NA	NA	NA	NA	NA	NA	NA	NA	NA	NA
NA	RAI14	NA	NA	NA	NA	NA	NA	NA	NA	NA	NA	NA	NA	NA
NA	RAP1GAP2	NA	NA	NA	NA	NA	NA	NA	NA	NA	NA	NA	NA	NA
NA	RAPGEF2	NA	NA	NA	NA	NA	NA	NA	NA	NA	NA	NA	NA	NA
NA	RAPGEF3	NA	NA	NA	NA	NA	NA	NA	NA	NA	NA	NA	NA	NA
NA	RAPH1	NA	NA	NA	NA	NA	NA	NA	NA	NA	NA	NA	NA	NA
NA	RASA2	NA	NA	NA	NA	NA	NA	NA	NA	NA	NA	NA	NA	NA
NA	RASA4	NA	NA	NA	NA	NA	NA	NA	NA	NA	NA	NA	NA	NA
NA	RASGRP1	NA	NA	NA	NA	NA	NA	NA	NA	NA	NA	NA	NA	NA
NA	RASSF7	NA	NA	NA	NA	NA	NA	NA	NA	NA	NA	NA	NA	NA
NA	RBM24	NA	NA	NA	NA	NA	NA	NA	NA	NA	NA	NA	NA	NA
NA	RBMS1	NA	NA	NA	NA	NA	NA	NA	NA	NA	NA	NA	NA	NA
NA	RBMS2	NA	NA	NA	NA	NA	NA	NA	NA	NA	NA	NA	NA	NA
NA	RBP5	NA	NA	NA	NA	NA	NA	NA	NA	NA	NA	NA	NA	NA
NA	RCAN1	NA	NA	NA	NA	NA	NA	NA	NA	NA	NA	NA	NA	NA
NA	RCOR3	NA	NA	NA	NA	NA	NA	NA	NA	NA	NA	NA	NA	NA
NA	RDH10	NA	NA	NA	NA	NA	NA	NA	NA	NA	NA	NA	NA	NA
NA	RECK	NA	NA	NA	NA	NA	NA	NA	NA	NA	NA	NA	NA	NA
NA	REEP2	NA	NA	NA	NA	NA	NA	NA	NA	NA	NA	NA	NA	NA
NA	REEP3	NA	NA	NA	NA	NA	NA	NA	NA	NA	NA	NA	NA	NA
NA	REEP5	NA	NA	NA	NA	NA	NA	NA	NA	NA	NA	NA	NA	NA
NA	REEP6	NA	NA	NA	NA	NA	NA	NA	NA	NA	NA	NA	NA	NA
NA	REN	NA	NA	NA	NA	NA	NA	NA	NA	NA	NA	NA	NA	NA
NA	RETSAT	NA	NA	NA	NA	NA	NA	NA	NA	NA	NA	NA	NA	NA
NA	RFTN1	NA	NA	NA	NA	NA	NA	NA	NA	NA	NA	NA	NA	NA
NA	RGL3	NA	NA	NA	NA	NA	NA	NA	NA	NA	NA	NA	NA	NA
NA	RGS11	NA	NA	NA	NA	NA	NA	NA	NA	NA	NA	NA	NA	NA
NA	RGS4	NA	NA	NA	NA	NA	NA	NA	NA	NA	NA	NA	NA	NA
NA	RGS5	NA	NA	NA	NA	NA	NA	NA	NA	NA	NA	NA	NA	NA
NA	RGS9	NA	NA	NA	NA	NA	NA	NA	NA	NA	NA	NA	NA	NA
NA	RHBDD2	NA	NA	NA	NA	NA	NA	NA	NA	NA	NA	NA	NA	NA
NA	RHBDF1	NA	NA	NA	NA	NA	NA	NA	NA	NA	NA	NA	NA	NA
NA	RHBDF2	NA	NA	NA	NA	NA	NA	NA	NA	NA	NA	NA	NA	NA
NA	RHBDL2	NA	NA	NA	NA	NA	NA	NA	NA	NA	NA	NA	NA	NA
NA	RHCG	NA	NA	NA	NA	NA	NA	NA	NA	NA	NA	NA	NA	NA
NA	RHD	NA	NA	NA	NA	NA	NA	NA	NA	NA	NA	NA	NA	NA
NA	RHOC	NA	NA	NA	NA	NA	NA	NA	NA	NA	NA	NA	NA	NA
NA	RHOJ	NA	NA	NA	NA	NA	NA	NA	NA	NA	NA	NA	NA	NA
NA	RHOQ	NA	NA	NA	NA	NA	NA	NA	NA	NA	NA	NA	NA	NA
NA	RHOV	NA	NA	NA	NA	NA	NA	NA	NA	NA	NA	NA	NA	NA
NA	RIMS1	NA	NA	NA	NA	NA	NA	NA	NA	NA	NA	NA	NA	NA
NA	RIN2	NA	NA	NA	NA	NA	NA	NA	NA	NA	NA	NA	NA	NA
NA	RIOK3	NA	NA	NA	NA	NA	NA	NA	NA	NA	NA	NA	NA	NA
NA	RIT1	NA	NA	NA	NA	NA	NA	NA	NA	NA	NA	NA	NA	NA
NA	RNASET2	NA	NA	NA	NA	NA	NA	NA	NA	NA	NA	NA	NA	NA
NA	RNF11	NA	NA	NA	NA	NA	NA	NA	NA	NA	NA	NA	NA	NA
NA	RNF13	NA	NA	NA	NA	NA	NA	NA	NA	NA	NA	NA	NA	NA
NA	RNF14	NA	NA	NA	NA	NA	NA	NA	NA	NA	NA	NA	NA	NA
NA	RNF141	NA	NA	NA	NA	NA	NA	NA	NA	NA	NA	NA	NA	NA
NA	RNF144B	NA	NA	NA	NA	NA	NA	NA	NA	NA	NA	NA	NA	NA
NA	RNF150	NA	NA	NA	NA	NA	NA	NA	NA	NA	NA	NA	NA	NA
NA	RNF152	NA	NA	NA	NA	NA	NA	NA	NA	NA	NA	NA	NA	NA
NA	RNF170	NA	NA	NA	NA	NA	NA	NA	NA	NA	NA	NA	NA	NA
NA	RNF181	NA	NA	NA	NA	NA	NA	NA	NA	NA	NA	NA	NA	NA
NA	RNF19A	NA	NA	NA	NA	NA	NA	NA	NA	NA	NA	NA	NA	NA
NA	RNF24	NA	NA	NA	NA	NA	NA	NA	NA	NA	NA	NA	NA	NA
NA	ROGDI	NA	NA	NA	NA	NA	NA	NA	NA	NA	NA	NA	NA	NA
NA	ROMO1	NA	NA	NA	NA	NA	NA	NA	NA	NA	NA	NA	NA	NA
NA	ROR1	NA	NA	NA	NA	NA	NA	NA	NA	NA	NA	NA	NA	NA
NA	RORA	NA	NA	NA	NA	NA	NA	NA	NA	NA	NA	NA	NA	NA
NA	RPL3L	NA	NA	NA	NA	NA	NA	NA	NA	NA	NA	NA	NA	NA
NA	RPRM	NA	NA	NA	NA	NA	NA	NA	NA	NA	NA	NA	NA	NA
NA	RPS27L	NA	NA	NA	NA	NA	NA	NA	NA	NA	NA	NA	NA	NA
NA	RPS6KL1	NA	NA	NA	NA	NA	NA	NA	NA	NA	NA	NA	NA	NA
NA	RRAD	NA	NA	NA	NA	NA	NA	NA	NA	NA	NA	NA	NA	NA
NA	RRAGC	NA	NA	NA	NA	NA	NA	NA	NA	NA	NA	NA	NA	NA
NA	RRAS	NA	NA	NA	NA	NA	NA	NA	NA	NA	NA	NA	NA	NA
NA	RRM2B	NA	NA	NA	NA	NA	NA	NA	NA	NA	NA	NA	NA	NA
NA	RSPH3	NA	NA	NA	NA	NA	NA	NA	NA	NA	NA	NA	NA	NA
NA	RSPO1	NA	NA	NA	NA	NA	NA	NA	NA	NA	NA	NA	NA	NA
NA	RSU1	NA	NA	NA	NA	NA	NA	NA	NA	NA	NA	NA	NA	NA
NA	RTN1	NA	NA	NA	NA	NA	NA	NA	NA	NA	NA	NA	NA	NA
NA	RUNX1	NA	NA	NA	NA	NA	NA	NA	NA	NA	NA	NA	NA	NA
NA	RUSC2	NA	NA	NA	NA	NA	NA	NA	NA	NA	NA	NA	NA	NA
NA	RWDD2A	NA	NA	NA	NA	NA	NA	NA	NA	NA	NA	NA	NA	NA
NA	SAA2	NA	NA	NA	NA	NA	NA	NA	NA	NA	NA	NA	NA	NA
NA	SAMD10	NA	NA	NA	NA	NA	NA	NA	NA	NA	NA	NA	NA	NA
NA	SAMD12	NA	NA	NA	NA	NA	NA	NA	NA	NA	NA	NA	NA	NA
NA	SAMD14	NA	NA	NA	NA	NA	NA	NA	NA	NA	NA	NA	NA	NA
NA	SAMD3	NA	NA	NA	NA	NA	NA	NA	NA	NA	NA	NA	NA	NA
NA	SAMD4A	NA	NA	NA	NA	NA	NA	NA	NA	NA	NA	NA	NA	NA
NA	SAMD9	NA	NA	NA	NA	NA	NA	NA	NA	NA	NA	NA	NA	NA
NA	SAMD9L	NA	NA	NA	NA	NA	NA	NA	NA	NA	NA	NA	NA	NA
NA	SASH1	NA	NA	NA	NA	NA	NA	NA	NA	NA	NA	NA	NA	NA
NA	SAT1	NA	NA	NA	NA	NA	NA	NA	NA	NA	NA	NA	NA	NA
NA	SATB1	NA	NA	NA	NA	NA	NA	NA	NA	NA	NA	NA	NA	NA
NA	SBDS	NA	NA	NA	NA	NA	NA	NA	NA	NA	NA	NA	NA	NA
NA	SCAMP1	NA	NA	NA	NA	NA	NA	NA	NA	NA	NA	NA	NA	NA
NA	SCAMP5	NA	NA	NA	NA	NA	NA	NA	NA	NA	NA	NA	NA	NA
NA	SCD5	NA	NA	NA	NA	NA	NA	NA	NA	NA	NA	NA	NA	NA
NA	SCG2	NA	NA	NA	NA	NA	NA	NA	NA	NA	NA	NA	NA	NA
NA	SCG5	NA	NA	NA	NA	NA	NA	NA	NA	NA	NA	NA	NA	NA
NA	SCGB2A1	NA	NA	NA	NA	NA	NA	NA	NA	NA	NA	NA	NA	NA
NA	SCIN	NA	NA	NA	NA	NA	NA	NA	NA	NA	NA	NA	NA	NA
NA	SCN2A	NA	NA	NA	NA	NA	NA	NA	NA	NA	NA	NA	NA	NA
NA	SCN8A	NA	NA	NA	NA	NA	NA	NA	NA	NA	NA	NA	NA	NA
NA	SCOC	NA	NA	NA	NA	NA	NA	NA	NA	NA	NA	NA	NA	NA
NA	SCUBE3	NA	NA	NA	NA	NA	NA	NA	NA	NA	NA	NA	NA	NA
NA	SDF2	NA	NA	NA	NA	NA	NA	NA	NA	NA	NA	NA	NA	NA
NA	SDF4	NA	NA	NA	NA	NA	NA	NA	NA	NA	NA	NA	NA	NA
NA	SEC14L1	NA	NA	NA	NA	NA	NA	NA	NA	NA	NA	NA	NA	NA
NA	SEC14L2	NA	NA	NA	NA	NA	NA	NA	NA	NA	NA	NA	NA	NA
NA	SEL1L3	NA	NA	NA	NA	NA	NA	NA	NA	NA	NA	NA	NA	NA
NA	SEMA3C	NA	NA	NA	NA	NA	NA	NA	NA	NA	NA	NA	NA	NA
NA	SEMA4F	NA	NA	NA	NA	NA	NA	NA	NA	NA	NA	NA	NA	NA
NA	SEMA5A	NA	NA	NA	NA	NA	NA	NA	NA	NA	NA	NA	NA	NA
NA	SEMA6A	NA	NA	NA	NA	NA	NA	NA	NA	NA	NA	NA	NA	NA
NA	SEMA6D	NA	NA	NA	NA	NA	NA	NA	NA	NA	NA	NA	NA	NA
NA	SERINC1	NA	NA	NA	NA	NA	NA	NA	NA	NA	NA	NA	NA	NA
NA	SERINC2	NA	NA	NA	NA	NA	NA	NA	NA	NA	NA	NA	NA	NA
NA	SERINC3	NA	NA	NA	NA	NA	NA	NA	NA	NA	NA	NA	NA	NA
NA	SERINC5	NA	NA	NA	NA	NA	NA	NA	NA	NA	NA	NA	NA	NA
NA	SERPINA1	NA	NA	NA	NA	NA	NA	NA	NA	NA	NA	NA	NA	NA
NA	SERPINA11	NA	NA	NA	NA	NA	NA	NA	NA	NA	NA	NA	NA	NA
NA	SERPINA3	NA	NA	NA	NA	NA	NA	NA	NA	NA	NA	NA	NA	NA
NA	SERPINA9	NA	NA	NA	NA	NA	NA	NA	NA	NA	NA	NA	NA	NA
NA	SERPINB7	NA	NA	NA	NA	NA	NA	NA	NA	NA	NA	NA	NA	NA
NA	SERPINB8	NA	NA	NA	NA	NA	NA	NA	NA	NA	NA	NA	NA	NA
NA	SERPINE1	NA	NA	NA	NA	NA	NA	NA	NA	NA	NA	NA	NA	NA
NA	SERPINE2	NA	NA	NA	NA	NA	NA	NA	NA	NA	NA	NA	NA	NA
NA	SERPINI1	NA	NA	NA	NA	NA	NA	NA	NA	NA	NA	NA	NA	NA
NA	SERTAD4	NA	NA	NA	NA	NA	NA	NA	NA	NA	NA	NA	NA	NA
NA	SESN1	NA	NA	NA	NA	NA	NA	NA	NA	NA	NA	NA	NA	NA
NA	SETD7	NA	NA	NA	NA	NA	NA	NA	NA	NA	NA	NA	NA	NA
NA	SEZ6L2	NA	NA	NA	NA	NA	NA	NA	NA	NA	NA	NA	NA	NA
NA	SFRP1	NA	NA	NA	NA	NA	NA	NA	NA	NA	NA	NA	NA	NA
NA	SFXN3	NA	NA	NA	NA	NA	NA	NA	NA	NA	NA	NA	NA	NA
NA	SGCB	NA	NA	NA	NA	NA	NA	NA	NA	NA	NA	NA	NA	NA
NA	SGIP1	NA	NA	NA	NA	NA	NA	NA	NA	NA	NA	NA	NA	NA
NA	SGK1	NA	NA	NA	NA	NA	NA	NA	NA	NA	NA	NA	NA	NA
NA	SGMS2	NA	NA	NA	NA	NA	NA	NA	NA	NA	NA	NA	NA	NA
NA	SGPP1	NA	NA	NA	NA	NA	NA	NA	NA	NA	NA	NA	NA	NA
NA	SGSH	NA	NA	NA	NA	NA	NA	NA	NA	NA	NA	NA	NA	NA
NA	SGTB	NA	NA	NA	NA	NA	NA	NA	NA	NA	NA	NA	NA	NA
NA	SH2D3A	NA	NA	NA	NA	NA	NA	NA	NA	NA	NA	NA	NA	NA
NA	SH3BGRL	NA	NA	NA	NA	NA	NA	NA	NA	NA	NA	NA	NA	NA
NA	SH3BGRL2	NA	NA	NA	NA	NA	NA	NA	NA	NA	NA	NA	NA	NA
NA	SH3BP5L	NA	NA	NA	NA	NA	NA	NA	NA	NA	NA	NA	NA	NA
NA	SH3GLB1	NA	NA	NA	NA	NA	NA	NA	NA	NA	NA	NA	NA	NA
NA	SH3PXD2A	NA	NA	NA	NA	NA	NA	NA	NA	NA	NA	NA	NA	NA
NA	SH3RF1	NA	NA	NA	NA	NA	NA	NA	NA	NA	NA	NA	NA	NA
NA	SH3RF2	NA	NA	NA	NA	NA	NA	NA	NA	NA	NA	NA	NA	NA
NA	SH3TC2	NA	NA	NA	NA	NA	NA	NA	NA	NA	NA	NA	NA	NA
NA	SHANK1	NA	NA	NA	NA	NA	NA	NA	NA	NA	NA	NA	NA	NA
NA	SHB	NA	NA	NA	NA	NA	NA	NA	NA	NA	NA	NA	NA	NA
NA	SHBG	NA	NA	NA	NA	NA	NA	NA	NA	NA	NA	NA	NA	NA
NA	SHC3	NA	NA	NA	NA	NA	NA	NA	NA	NA	NA	NA	NA	NA
NA	SHC4	NA	NA	NA	NA	NA	NA	NA	NA	NA	NA	NA	NA	NA
NA	SHOX2	NA	NA	NA	NA	NA	NA	NA	NA	NA	NA	NA	NA	NA
NA	SHROOM3	NA	NA	NA	NA	NA	NA	NA	NA	NA	NA	NA	NA	NA
NA	SHROOM4	NA	NA	NA	NA	NA	NA	NA	NA	NA	NA	NA	NA	NA
NA	SIL1	NA	NA	NA	NA	NA	NA	NA	NA	NA	NA	NA	NA	NA
NA	SIPA1L1	NA	NA	NA	NA	NA	NA	NA	NA	NA	NA	NA	NA	NA
NA	SLA	NA	NA	NA	NA	NA	NA	NA	NA	NA	NA	NA	NA	NA
NA	SLAMF8	NA	NA	NA	NA	NA	NA	NA	NA	NA	NA	NA	NA	NA
NA	SLC10A3	NA	NA	NA	NA	NA	NA	NA	NA	NA	NA	NA	NA	NA
NA	SLC10A6	NA	NA	NA	NA	NA	NA	NA	NA	NA	NA	NA	NA	NA
NA	SLC12A4	NA	NA	NA	NA	NA	NA	NA	NA	NA	NA	NA	NA	NA
NA	SLC15A4	NA	NA	NA	NA	NA	NA	NA	NA	NA	NA	NA	NA	NA
NA	SLC16A2	NA	NA	NA	NA	NA	NA	NA	NA	NA	NA	NA	NA	NA
NA	SLC16A3	NA	NA	NA	NA	NA	NA	NA	NA	NA	NA	NA	NA	NA
NA	SLC17A5	NA	NA	NA	NA	NA	NA	NA	NA	NA	NA	NA	NA	NA
NA	SLC19A2	NA	NA	NA	NA	NA	NA	NA	NA	NA	NA	NA	NA	NA
NA	SLC1A1	NA	NA	NA	NA	NA	NA	NA	NA	NA	NA	NA	NA	NA
NA	SLC1A7	NA	NA	NA	NA	NA	NA	NA	NA	NA	NA	NA	NA	NA
NA	SLC20A1	NA	NA	NA	NA	NA	NA	NA	NA	NA	NA	NA	NA	NA
NA	SLC20A2	NA	NA	NA	NA	NA	NA	NA	NA	NA	NA	NA	NA	NA
NA	SLC22A13	NA	NA	NA	NA	NA	NA	NA	NA	NA	NA	NA	NA	NA
NA	SLC22A15	NA	NA	NA	NA	NA	NA	NA	NA	NA	NA	NA	NA	NA
NA	SLC22A18	NA	NA	NA	NA	NA	NA	NA	NA	NA	NA	NA	NA	NA
NA	SLC22A23	NA	NA	NA	NA	NA	NA	NA	NA	NA	NA	NA	NA	NA
NA	SLC22A4	NA	NA	NA	NA	NA	NA	NA	NA	NA	NA	NA	NA	NA
NA	SLC22A5	NA	NA	NA	NA	NA	NA	NA	NA	NA	NA	NA	NA	NA
NA	SLC24A4	NA	NA	NA	NA	NA	NA	NA	NA	NA	NA	NA	NA	NA
NA	SLC25A20	NA	NA	NA	NA	NA	NA	NA	NA	NA	NA	NA	NA	NA
NA	SLC25A23	NA	NA	NA	NA	NA	NA	NA	NA	NA	NA	NA	NA	NA
NA	SLC25A4	NA	NA	NA	NA	NA	NA	NA	NA	NA	NA	NA	NA	NA
NA	SLC25A45	NA	NA	NA	NA	NA	NA	NA	NA	NA	NA	NA	NA	NA
NA	SLC26A1	NA	NA	NA	NA	NA	NA	NA	NA	NA	NA	NA	NA	NA
NA	SLC26A2	NA	NA	NA	NA	NA	NA	NA	NA	NA	NA	NA	NA	NA
NA	SLC27A4	NA	NA	NA	NA	NA	NA	NA	NA	NA	NA	NA	NA	NA
NA	SLC2A1	NA	NA	NA	NA	NA	NA	NA	NA	NA	NA	NA	NA	NA
NA	SLC2A10	NA	NA	NA	NA	NA	NA	NA	NA	NA	NA	NA	NA	NA
NA	SLC2A11	NA	NA	NA	NA	NA	NA	NA	NA	NA	NA	NA	NA	NA
NA	SLC2A13	NA	NA	NA	NA	NA	NA	NA	NA	NA	NA	NA	NA	NA
NA	SLC2A14	NA	NA	NA	NA	NA	NA	NA	NA	NA	NA	NA	NA	NA
NA	SLC2A6	NA	NA	NA	NA	NA	NA	NA	NA	NA	NA	NA	NA	NA
NA	SLC2A9	NA	NA	NA	NA	NA	NA	NA	NA	NA	NA	NA	NA	NA
NA	SLC30A4	NA	NA	NA	NA	NA	NA	NA	NA	NA	NA	NA	NA	NA
NA	SLC31A2	NA	NA	NA	NA	NA	NA	NA	NA	NA	NA	NA	NA	NA
NA	SLC33A1	NA	NA	NA	NA	NA	NA	NA	NA	NA	NA	NA	NA	NA
NA	SLC35A1	NA	NA	NA	NA	NA	NA	NA	NA	NA	NA	NA	NA	NA
NA	SLC35A3	NA	NA	NA	NA	NA	NA	NA	NA	NA	NA	NA	NA	NA
NA	SLC35B3	NA	NA	NA	NA	NA	NA	NA	NA	NA	NA	NA	NA	NA
NA	SLC35E1	NA	NA	NA	NA	NA	NA	NA	NA	NA	NA	NA	NA	NA
NA	SLC35E3	NA	NA	NA	NA	NA	NA	NA	NA	NA	NA	NA	NA	NA
NA	SLC35F3	NA	NA	NA	NA	NA	NA	NA	NA	NA	NA	NA	NA	NA
NA	SLC35F5	NA	NA	NA	NA	NA	NA	NA	NA	NA	NA	NA	NA	NA
NA	SLC36A1	NA	NA	NA	NA	NA	NA	NA	NA	NA	NA	NA	NA	NA
NA	SLC38A11	NA	NA	NA	NA	NA	NA	NA	NA	NA	NA	NA	NA	NA
NA	SLC38A7	NA	NA	NA	NA	NA	NA	NA	NA	NA	NA	NA	NA	NA
NA	SLC38A9	NA	NA	NA	NA	NA	NA	NA	NA	NA	NA	NA	NA	NA
NA	SLC39A10	NA	NA	NA	NA	NA	NA	NA	NA	NA	NA	NA	NA	NA
NA	SLC39A13	NA	NA	NA	NA	NA	NA	NA	NA	NA	NA	NA	NA	NA
NA	SLC39A6	NA	NA	NA	NA	NA	NA	NA	NA	NA	NA	NA	NA	NA
NA	SLC39A8	NA	NA	NA	NA	NA	NA	NA	NA	NA	NA	NA	NA	NA
NA	SLC41A2	NA	NA	NA	NA	NA	NA	NA	NA	NA	NA	NA	NA	NA
NA	SLC43A2	NA	NA	NA	NA	NA	NA	NA	NA	NA	NA	NA	NA	NA
NA	SLC44A3	NA	NA	NA	NA	NA	NA	NA	NA	NA	NA	NA	NA	NA
NA	SLC45A4	NA	NA	NA	NA	NA	NA	NA	NA	NA	NA	NA	NA	NA
NA	SLC46A3	NA	NA	NA	NA	NA	NA	NA	NA	NA	NA	NA	NA	NA
NA	SLC47A1	NA	NA	NA	NA	NA	NA	NA	NA	NA	NA	NA	NA	NA
NA	SLC4A11	NA	NA	NA	NA	NA	NA	NA	NA	NA	NA	NA	NA	NA
NA	SLC4A3	NA	NA	NA	NA	NA	NA	NA	NA	NA	NA	NA	NA	NA
NA	SLC4A5	NA	NA	NA	NA	NA	NA	NA	NA	NA	NA	NA	NA	NA
NA	SLC4A9	NA	NA	NA	NA	NA	NA	NA	NA	NA	NA	NA	NA	NA
NA	SLC5A3	NA	NA	NA	NA	NA	NA	NA	NA	NA	NA	NA	NA	NA
NA	SLC6A18	NA	NA	NA	NA	NA	NA	NA	NA	NA	NA	NA	NA	NA
NA	SLC6A4	NA	NA	NA	NA	NA	NA	NA	NA	NA	NA	NA	NA	NA
NA	SLC6A6	NA	NA	NA	NA	NA	NA	NA	NA	NA	NA	NA	NA	NA
NA	SLC7A5	NA	NA	NA	NA	NA	NA	NA	NA	NA	NA	NA	NA	NA
NA	SLC9A3R2	NA	NA	NA	NA	NA	NA	NA	NA	NA	NA	NA	NA	NA
NA	SLC9A7	NA	NA	NA	NA	NA	NA	NA	NA	NA	NA	NA	NA	NA
NA	SLCO2A1	NA	NA	NA	NA	NA	NA	NA	NA	NA	NA	NA	NA	NA
NA	SLFN5	NA	NA	NA	NA	NA	NA	NA	NA	NA	NA	NA	NA	NA
NA	SLURP1	NA	NA	NA	NA	NA	NA	NA	NA	NA	NA	NA	NA	NA
NA	SMOC1	NA	NA	NA	NA	NA	NA	NA	NA	NA	NA	NA	NA	NA
NA	SMPD1	NA	NA	NA	NA	NA	NA	NA	NA	NA	NA	NA	NA	NA
NA	SMURF2	NA	NA	NA	NA	NA	NA	NA	NA	NA	NA	NA	NA	NA
NA	SNAPC3	NA	NA	NA	NA	NA	NA	NA	NA	NA	NA	NA	NA	NA
NA	SNORA37	NA	NA	NA	NA	NA	NA	NA	NA	NA	NA	NA	NA	NA
NA	SNORA60	NA	NA	NA	NA	NA	NA	NA	NA	NA	NA	NA	NA	NA
NA	SNTA1	NA	NA	NA	NA	NA	NA	NA	NA	NA	NA	NA	NA	NA
NA	SNX24	NA	NA	NA	NA	NA	NA	NA	NA	NA	NA	NA	NA	NA
NA	SNX25	NA	NA	NA	NA	NA	NA	NA	NA	NA	NA	NA	NA	NA
NA	SOHLH1	NA	NA	NA	NA	NA	NA	NA	NA	NA	NA	NA	NA	NA
NA	SORBS1	NA	NA	NA	NA	NA	NA	NA	NA	NA	NA	NA	NA	NA
NA	SORCS2	NA	NA	NA	NA	NA	NA	NA	NA	NA	NA	NA	NA	NA
NA	SORT1	NA	NA	NA	NA	NA	NA	NA	NA	NA	NA	NA	NA	NA
NA	SP100	NA	NA	NA	NA	NA	NA	NA	NA	NA	NA	NA	NA	NA
NA	SPAG4	NA	NA	NA	NA	NA	NA	NA	NA	NA	NA	NA	NA	NA
NA	SPARC	NA	NA	NA	NA	NA	NA	NA	NA	NA	NA	NA	NA	NA
NA	SPATA18	NA	NA	NA	NA	NA	NA	NA	NA	NA	NA	NA	NA	NA
NA	SPATA20	NA	NA	NA	NA	NA	NA	NA	NA	NA	NA	NA	NA	NA
NA	SPATA22	NA	NA	NA	NA	NA	NA	NA	NA	NA	NA	NA	NA	NA
NA	SPINT2	NA	NA	NA	NA	NA	NA	NA	NA	NA	NA	NA	NA	NA
NA	SPNS2	NA	NA	NA	NA	NA	NA	NA	NA	NA	NA	NA	NA	NA
NA	SPOCK1	NA	NA	NA	NA	NA	NA	NA	NA	NA	NA	NA	NA	NA
NA	SPRN	NA	NA	NA	NA	NA	NA	NA	NA	NA	NA	NA	NA	NA
NA	SPRY3	NA	NA	NA	NA	NA	NA	NA	NA	NA	NA	NA	NA	NA
NA	SPRYD3	NA	NA	NA	NA	NA	NA	NA	NA	NA	NA	NA	NA	NA
NA	SPTAN1	NA	NA	NA	NA	NA	NA	NA	NA	NA	NA	NA	NA	NA
NA	SRD5A1	NA	NA	NA	NA	NA	NA	NA	NA	NA	NA	NA	NA	NA
NA	SRD5A3	NA	NA	NA	NA	NA	NA	NA	NA	NA	NA	NA	NA	NA
NA	SRGN	NA	NA	NA	NA	NA	NA	NA	NA	NA	NA	NA	NA	NA
NA	SRPK3	NA	NA	NA	NA	NA	NA	NA	NA	NA	NA	NA	NA	NA
NA	SRPX	NA	NA	NA	NA	NA	NA	NA	NA	NA	NA	NA	NA	NA
NA	SRPX2	NA	NA	NA	NA	NA	NA	NA	NA	NA	NA	NA	NA	NA
NA	SSC5D	NA	NA	NA	NA	NA	NA	NA	NA	NA	NA	NA	NA	NA
NA	ST3GAL5	NA	NA	NA	NA	NA	NA	NA	NA	NA	NA	NA	NA	NA
NA	ST3GAL6	NA	NA	NA	NA	NA	NA	NA	NA	NA	NA	NA	NA	NA
NA	ST6GALNAC5	NA	NA	NA	NA	NA	NA	NA	NA	NA	NA	NA	NA	NA
NA	STARD4	NA	NA	NA	NA	NA	NA	NA	NA	NA	NA	NA	NA	NA
NA	STC2	NA	NA	NA	NA	NA	NA	NA	NA	NA	NA	NA	NA	NA
NA	STIM1	NA	NA	NA	NA	NA	NA	NA	NA	NA	NA	NA	NA	NA
NA	STK10	NA	NA	NA	NA	NA	NA	NA	NA	NA	NA	NA	NA	NA
NA	STK17A	NA	NA	NA	NA	NA	NA	NA	NA	NA	NA	NA	NA	NA
NA	STK38	NA	NA	NA	NA	NA	NA	NA	NA	NA	NA	NA	NA	NA
NA	STK38L	NA	NA	NA	NA	NA	NA	NA	NA	NA	NA	NA	NA	NA
NA	STS	NA	NA	NA	NA	NA	NA	NA	NA	NA	NA	NA	NA	NA
NA	STX11	NA	NA	NA	NA	NA	NA	NA	NA	NA	NA	NA	NA	NA
NA	STX12	NA	NA	NA	NA	NA	NA	NA	NA	NA	NA	NA	NA	NA
NA	STX3	NA	NA	NA	NA	NA	NA	NA	NA	NA	NA	NA	NA	NA
NA	STX4	NA	NA	NA	NA	NA	NA	NA	NA	NA	NA	NA	NA	NA
NA	STX7	NA	NA	NA	NA	NA	NA	NA	NA	NA	NA	NA	NA	NA
NA	STXBP1	NA	NA	NA	NA	NA	NA	NA	NA	NA	NA	NA	NA	NA
NA	STXBP3	NA	NA	NA	NA	NA	NA	NA	NA	NA	NA	NA	NA	NA
NA	STXBP6	NA	NA	NA	NA	NA	NA	NA	NA	NA	NA	NA	NA	NA
NA	STYK1	NA	NA	NA	NA	NA	NA	NA	NA	NA	NA	NA	NA	NA
NA	SVEP1	NA	NA	NA	NA	NA	NA	NA	NA	NA	NA	NA	NA	NA
NA	SVIL	NA	NA	NA	NA	NA	NA	NA	NA	NA	NA	NA	NA	NA
NA	SYNGR2	NA	NA	NA	NA	NA	NA	NA	NA	NA	NA	NA	NA	NA
NA	SYNPO2L	NA	NA	NA	NA	NA	NA	NA	NA	NA	NA	NA	NA	NA
NA	SYPL2	NA	NA	NA	NA	NA	NA	NA	NA	NA	NA	NA	NA	NA
NA	SYT16	NA	NA	NA	NA	NA	NA	NA	NA	NA	NA	NA	NA	NA
NA	SYT17	NA	NA	NA	NA	NA	NA	NA	NA	NA	NA	NA	NA	NA
NA	SYTL3	NA	NA	NA	NA	NA	NA	NA	NA	NA	NA	NA	NA	NA
NA	SYTL5	NA	NA	NA	NA	NA	NA	NA	NA	NA	NA	NA	NA	NA
NA	TAB3	NA	NA	NA	NA	NA	NA	NA	NA	NA	NA	NA	NA	NA
NA	TACC1	NA	NA	NA	NA	NA	NA	NA	NA	NA	NA	NA	NA	NA
NA	TAF13	NA	NA	NA	NA	NA	NA	NA	NA	NA	NA	NA	NA	NA
NA	TAGLN	NA	NA	NA	NA	NA	NA	NA	NA	NA	NA	NA	NA	NA
NA	TAL2	NA	NA	NA	NA	NA	NA	NA	NA	NA	NA	NA	NA	NA
NA	TANC1	NA	NA	NA	NA	NA	NA	NA	NA	NA	NA	NA	NA	NA
NA	TAOK2	NA	NA	NA	NA	NA	NA	NA	NA	NA	NA	NA	NA	NA
NA	TAPBP	NA	NA	NA	NA	NA	NA	NA	NA	NA	NA	NA	NA	NA
NA	TAPT1	NA	NA	NA	NA	NA	NA	NA	NA	NA	NA	NA	NA	NA
NA	TARSL2	NA	NA	NA	NA	NA	NA	NA	NA	NA	NA	NA	NA	NA
NA	TBC1D17	NA	NA	NA	NA	NA	NA	NA	NA	NA	NA	NA	NA	NA
NA	TBC1D19	NA	NA	NA	NA	NA	NA	NA	NA	NA	NA	NA	NA	NA
NA	TBC1D2	NA	NA	NA	NA	NA	NA	NA	NA	NA	NA	NA	NA	NA
NA	TBC1D2B	NA	NA	NA	NA	NA	NA	NA	NA	NA	NA	NA	NA	NA
NA	TBC1D4	NA	NA	NA	NA	NA	NA	NA	NA	NA	NA	NA	NA	NA
NA	TBC1D8B	NA	NA	NA	NA	NA	NA	NA	NA	NA	NA	NA	NA	NA
NA	TBCEL	NA	NA	NA	NA	NA	NA	NA	NA	NA	NA	NA	NA	NA
NA	TCEAL4	NA	NA	NA	NA	NA	NA	NA	NA	NA	NA	NA	NA	NA
NA	TCF23	NA	NA	NA	NA	NA	NA	NA	NA	NA	NA	NA	NA	NA
NA	TCP11L1	NA	NA	NA	NA	NA	NA	NA	NA	NA	NA	NA	NA	NA
NA	TCTA	NA	NA	NA	NA	NA	NA	NA	NA	NA	NA	NA	NA	NA
NA	TDRKH	NA	NA	NA	NA	NA	NA	NA	NA	NA	NA	NA	NA	NA
NA	TERF2IP	NA	NA	NA	NA	NA	NA	NA	NA	NA	NA	NA	NA	NA
NA	TEX2	NA	NA	NA	NA	NA	NA	NA	NA	NA	NA	NA	NA	NA
NA	TEX264	NA	NA	NA	NA	NA	NA	NA	NA	NA	NA	NA	NA	NA
NA	TFAP2A	NA	NA	NA	NA	NA	NA	NA	NA	NA	NA	NA	NA	NA
NA	TFEB	NA	NA	NA	NA	NA	NA	NA	NA	NA	NA	NA	NA	NA
NA	TG	NA	NA	NA	NA	NA	NA	NA	NA	NA	NA	NA	NA	NA
NA	TGFB2	NA	NA	NA	NA	NA	NA	NA	NA	NA	NA	NA	NA	NA
NA	TGFBR2	NA	NA	NA	NA	NA	NA	NA	NA	NA	NA	NA	NA	NA
NA	TGM2	NA	NA	NA	NA	NA	NA	NA	NA	NA	NA	NA	NA	NA
NA	THAP8	NA	NA	NA	NA	NA	NA	NA	NA	NA	NA	NA	NA	NA
NA	THBS2	NA	NA	NA	NA	NA	NA	NA	NA	NA	NA	NA	NA	NA
NA	THEMIS	NA	NA	NA	NA	NA	NA	NA	NA	NA	NA	NA	NA	NA
NA	THY1	NA	NA	NA	NA	NA	NA	NA	NA	NA	NA	NA	NA	NA
NA	TIAM1	NA	NA	NA	NA	NA	NA	NA	NA	NA	NA	NA	NA	NA
NA	TIMP2	NA	NA	NA	NA	NA	NA	NA	NA	NA	NA	NA	NA	NA
NA	TIMP3	NA	NA	NA	NA	NA	NA	NA	NA	NA	NA	NA	NA	NA
NA	TK2	NA	NA	NA	NA	NA	NA	NA	NA	NA	NA	NA	NA	NA
NA	TLL2	NA	NA	NA	NA	NA	NA	NA	NA	NA	NA	NA	NA	NA
NA	TLR4	NA	NA	NA	NA	NA	NA	NA	NA	NA	NA	NA	NA	NA
NA	TM2D1	NA	NA	NA	NA	NA	NA	NA	NA	NA	NA	NA	NA	NA
NA	TM2D2	NA	NA	NA	NA	NA	NA	NA	NA	NA	NA	NA	NA	NA
NA	TM6SF2	NA	NA	NA	NA	NA	NA	NA	NA	NA	NA	NA	NA	NA
NA	TM7SF3	NA	NA	NA	NA	NA	NA	NA	NA	NA	NA	NA	NA	NA
NA	TMBIM1	NA	NA	NA	NA	NA	NA	NA	NA	NA	NA	NA	NA	NA
NA	TMC6	NA	NA	NA	NA	NA	NA	NA	NA	NA	NA	NA	NA	NA
NA	TMCC1	NA	NA	NA	NA	NA	NA	NA	NA	NA	NA	NA	NA	NA
NA	TMCO1	NA	NA	NA	NA	NA	NA	NA	NA	NA	NA	NA	NA	NA
NA	TMED3	NA	NA	NA	NA	NA	NA	NA	NA	NA	NA	NA	NA	NA
NA	TMED4	NA	NA	NA	NA	NA	NA	NA	NA	NA	NA	NA	NA	NA
NA	TMEM102	NA	NA	NA	NA	NA	NA	NA	NA	NA	NA	NA	NA	NA
NA	TMEM106A	NA	NA	NA	NA	NA	NA	NA	NA	NA	NA	NA	NA	NA
NA	TMEM108	NA	NA	NA	NA	NA	NA	NA	NA	NA	NA	NA	NA	NA
NA	TMEM117	NA	NA	NA	NA	NA	NA	NA	NA	NA	NA	NA	NA	NA
NA	TMEM120A	NA	NA	NA	NA	NA	NA	NA	NA	NA	NA	NA	NA	NA
NA	TMEM127	NA	NA	NA	NA	NA	NA	NA	NA	NA	NA	NA	NA	NA
NA	TMEM129	NA	NA	NA	NA	NA	NA	NA	NA	NA	NA	NA	NA	NA
NA	TMEM131	NA	NA	NA	NA	NA	NA	NA	NA	NA	NA	NA	NA	NA
NA	TMEM134	NA	NA	NA	NA	NA	NA	NA	NA	NA	NA	NA	NA	NA
NA	TMEM136	NA	NA	NA	NA	NA	NA	NA	NA	NA	NA	NA	NA	NA
NA	TMEM150A	NA	NA	NA	NA	NA	NA	NA	NA	NA	NA	NA	NA	NA
NA	TMEM154	NA	NA	NA	NA	NA	NA	NA	NA	NA	NA	NA	NA	NA
NA	TMEM156	NA	NA	NA	NA	NA	NA	NA	NA	NA	NA	NA	NA	NA
NA	TMEM159	NA	NA	NA	NA	NA	NA	NA	NA	NA	NA	NA	NA	NA
NA	TMEM165	NA	NA	NA	NA	NA	NA	NA	NA	NA	NA	NA	NA	NA
NA	TMEM173	NA	NA	NA	NA	NA	NA	NA	NA	NA	NA	NA	NA	NA
NA	TMEM175	NA	NA	NA	NA	NA	NA	NA	NA	NA	NA	NA	NA	NA
NA	TMEM179B	NA	NA	NA	NA	NA	NA	NA	NA	NA	NA	NA	NA	NA
NA	TMEM181	NA	NA	NA	NA	NA	NA	NA	NA	NA	NA	NA	NA	NA
NA	TMEM187	NA	NA	NA	NA	NA	NA	NA	NA	NA	NA	NA	NA	NA
NA	TMEM200A	NA	NA	NA	NA	NA	NA	NA	NA	NA	NA	NA	NA	NA
NA	TMEM217	NA	NA	NA	NA	NA	NA	NA	NA	NA	NA	NA	NA	NA
NA	TMEM219	NA	NA	NA	NA	NA	NA	NA	NA	NA	NA	NA	NA	NA
NA	TMEM232	NA	NA	NA	NA	NA	NA	NA	NA	NA	NA	NA	NA	NA
NA	TMEM30A	NA	NA	NA	NA	NA	NA	NA	NA	NA	NA	NA	NA	NA
NA	TMEM41B	NA	NA	NA	NA	NA	NA	NA	NA	NA	NA	NA	NA	NA
NA	TMEM50A	NA	NA	NA	NA	NA	NA	NA	NA	NA	NA	NA	NA	NA
NA	TMEM59	NA	NA	NA	NA	NA	NA	NA	NA	NA	NA	NA	NA	NA
NA	TMEM63A	NA	NA	NA	NA	NA	NA	NA	NA	NA	NA	NA	NA	NA
NA	TMEM63B	NA	NA	NA	NA	NA	NA	NA	NA	NA	NA	NA	NA	NA
NA	TMEM86A	NA	NA	NA	NA	NA	NA	NA	NA	NA	NA	NA	NA	NA
NA	TMEM8A	NA	NA	NA	NA	NA	NA	NA	NA	NA	NA	NA	NA	NA
NA	TMEM95	NA	NA	NA	NA	NA	NA	NA	NA	NA	NA	NA	NA	NA
NA	TMEM9B	NA	NA	NA	NA	NA	NA	NA	NA	NA	NA	NA	NA	NA
NA	TMOD2	NA	NA	NA	NA	NA	NA	NA	NA	NA	NA	NA	NA	NA
NA	TMOD3	NA	NA	NA	NA	NA	NA	NA	NA	NA	NA	NA	NA	NA
NA	TNFAIP1	NA	NA	NA	NA	NA	NA	NA	NA	NA	NA	NA	NA	NA
NA	TNFAIP8L3	NA	NA	NA	NA	NA	NA	NA	NA	NA	NA	NA	NA	NA
NA	TNFRSF10A	NA	NA	NA	NA	NA	NA	NA	NA	NA	NA	NA	NA	NA
NA	TNFRSF10B	NA	NA	NA	NA	NA	NA	NA	NA	NA	NA	NA	NA	NA
NA	TNFRSF10D	NA	NA	NA	NA	NA	NA	NA	NA	NA	NA	NA	NA	NA
NA	TNFRSF13B	NA	NA	NA	NA	NA	NA	NA	NA	NA	NA	NA	NA	NA
NA	TNFRSF21	NA	NA	NA	NA	NA	NA	NA	NA	NA	NA	NA	NA	NA
NA	TNFSF10	NA	NA	NA	NA	NA	NA	NA	NA	NA	NA	NA	NA	NA
NA	TNFSF15	NA	NA	NA	NA	NA	NA	NA	NA	NA	NA	NA	NA	NA
NA	TNFSF18	NA	NA	NA	NA	NA	NA	NA	NA	NA	NA	NA	NA	NA
NA	TNFSF4	NA	NA	NA	NA	NA	NA	NA	NA	NA	NA	NA	NA	NA
NA	TNFSF9	NA	NA	NA	NA	NA	NA	NA	NA	NA	NA	NA	NA	NA
NA	TNIP1	NA	NA	NA	NA	NA	NA	NA	NA	NA	NA	NA	NA	NA
NA	TNNT2	NA	NA	NA	NA	NA	NA	NA	NA	NA	NA	NA	NA	NA
NA	TNP2	NA	NA	NA	NA	NA	NA	NA	NA	NA	NA	NA	NA	NA
NA	TNS1	NA	NA	NA	NA	NA	NA	NA	NA	NA	NA	NA	NA	NA
NA	TOB1	NA	NA	NA	NA	NA	NA	NA	NA	NA	NA	NA	NA	NA
NA	TOM1	NA	NA	NA	NA	NA	NA	NA	NA	NA	NA	NA	NA	NA
NA	TOM1L2	NA	NA	NA	NA	NA	NA	NA	NA	NA	NA	NA	NA	NA
NA	TOR1AIP2	NA	NA	NA	NA	NA	NA	NA	NA	NA	NA	NA	NA	NA
NA	TOR1B	NA	NA	NA	NA	NA	NA	NA	NA	NA	NA	NA	NA	NA
NA	TP53INP1	NA	NA	NA	NA	NA	NA	NA	NA	NA	NA	NA	NA	NA
NA	TP53INP2	NA	NA	NA	NA	NA	NA	NA	NA	NA	NA	NA	NA	NA
NA	TPBG	NA	NA	NA	NA	NA	NA	NA	NA	NA	NA	NA	NA	NA
NA	TPCN1	NA	NA	NA	NA	NA	NA	NA	NA	NA	NA	NA	NA	NA
NA	TPD52L1	NA	NA	NA	NA	NA	NA	NA	NA	NA	NA	NA	NA	NA
NA	TPD52L2	NA	NA	NA	NA	NA	NA	NA	NA	NA	NA	NA	NA	NA
NA	TPM1	NA	NA	NA	NA	NA	NA	NA	NA	NA	NA	NA	NA	NA
NA	TPRG1L	NA	NA	NA	NA	NA	NA	NA	NA	NA	NA	NA	NA	NA
NA	TRAF6	NA	NA	NA	NA	NA	NA	NA	NA	NA	NA	NA	NA	NA
NA	TRAK1	NA	NA	NA	NA	NA	NA	NA	NA	NA	NA	NA	NA	NA
NA	TRAK2	NA	NA	NA	NA	NA	NA	NA	NA	NA	NA	NA	NA	NA
NA	TRAM1	NA	NA	NA	NA	NA	NA	NA	NA	NA	NA	NA	NA	NA
NA	TREM1	NA	NA	NA	NA	NA	NA	NA	NA	NA	NA	NA	NA	NA
NA	TRIB2	NA	NA	NA	NA	NA	NA	NA	NA	NA	NA	NA	NA	NA
NA	TRIM22	NA	NA	NA	NA	NA	NA	NA	NA	NA	NA	NA	NA	NA
NA	TRIM32	NA	NA	NA	NA	NA	NA	NA	NA	NA	NA	NA	NA	NA
NA	TRIML2	NA	NA	NA	NA	NA	NA	NA	NA	NA	NA	NA	NA	NA
NA	TRPC1	NA	NA	NA	NA	NA	NA	NA	NA	NA	NA	NA	NA	NA
NA	TRPC4	NA	NA	NA	NA	NA	NA	NA	NA	NA	NA	NA	NA	NA
NA	TRPM4	NA	NA	NA	NA	NA	NA	NA	NA	NA	NA	NA	NA	NA
NA	TRPS1	NA	NA	NA	NA	NA	NA	NA	NA	NA	NA	NA	NA	NA
NA	TRPV2	NA	NA	NA	NA	NA	NA	NA	NA	NA	NA	NA	NA	NA
NA	TSC22D1	NA	NA	NA	NA	NA	NA	NA	NA	NA	NA	NA	NA	NA
NA	TSC22D3	NA	NA	NA	NA	NA	NA	NA	NA	NA	NA	NA	NA	NA
NA	TSEN34	NA	NA	NA	NA	NA	NA	NA	NA	NA	NA	NA	NA	NA
NA	TSGA10	NA	NA	NA	NA	NA	NA	NA	NA	NA	NA	NA	NA	NA
NA	TSPAN11	NA	NA	NA	NA	NA	NA	NA	NA	NA	NA	NA	NA	NA
NA	TSPAN13	NA	NA	NA	NA	NA	NA	NA	NA	NA	NA	NA	NA	NA
NA	TSPAN14	NA	NA	NA	NA	NA	NA	NA	NA	NA	NA	NA	NA	NA
NA	TSPAN4	NA	NA	NA	NA	NA	NA	NA	NA	NA	NA	NA	NA	NA
NA	TSPAN9	NA	NA	NA	NA	NA	NA	NA	NA	NA	NA	NA	NA	NA
NA	TSPYL1	NA	NA	NA	NA	NA	NA	NA	NA	NA	NA	NA	NA	NA
NA	TSPYL2	NA	NA	NA	NA	NA	NA	NA	NA	NA	NA	NA	NA	NA
NA	TSTA3	NA	NA	NA	NA	NA	NA	NA	NA	NA	NA	NA	NA	NA
NA	TTC13	NA	NA	NA	NA	NA	NA	NA	NA	NA	NA	NA	NA	NA
NA	TTC23L	NA	NA	NA	NA	NA	NA	NA	NA	NA	NA	NA	NA	NA
NA	TTC3	NA	NA	NA	NA	NA	NA	NA	NA	NA	NA	NA	NA	NA
NA	TTC36	NA	NA	NA	NA	NA	NA	NA	NA	NA	NA	NA	NA	NA
NA	TTC9	NA	NA	NA	NA	NA	NA	NA	NA	NA	NA	NA	NA	NA
NA	TUBA4A	NA	NA	NA	NA	NA	NA	NA	NA	NA	NA	NA	NA	NA
NA	TUBB2A	NA	NA	NA	NA	NA	NA	NA	NA	NA	NA	NA	NA	NA
NA	TUBG2	NA	NA	NA	NA	NA	NA	NA	NA	NA	NA	NA	NA	NA
NA	TUFT1	NA	NA	NA	NA	NA	NA	NA	NA	NA	NA	NA	NA	NA
NA	TUSC3	NA	NA	NA	NA	NA	NA	NA	NA	NA	NA	NA	NA	NA
NA	TXNDC11	NA	NA	NA	NA	NA	NA	NA	NA	NA	NA	NA	NA	NA
NA	TXNDC17	NA	NA	NA	NA	NA	NA	NA	NA	NA	NA	NA	NA	NA
NA	TYRP1	NA	NA	NA	NA	NA	NA	NA	NA	NA	NA	NA	NA	NA
NA	UACA	NA	NA	NA	NA	NA	NA	NA	NA	NA	NA	NA	NA	NA
NA	UBASH3B	NA	NA	NA	NA	NA	NA	NA	NA	NA	NA	NA	NA	NA
NA	UBE2B	NA	NA	NA	NA	NA	NA	NA	NA	NA	NA	NA	NA	NA
NA	UBE2E2	NA	NA	NA	NA	NA	NA	NA	NA	NA	NA	NA	NA	NA
NA	UBE2H	NA	NA	NA	NA	NA	NA	NA	NA	NA	NA	NA	NA	NA
NA	UBE2W	NA	NA	NA	NA	NA	NA	NA	NA	NA	NA	NA	NA	NA
NA	UBL3	NA	NA	NA	NA	NA	NA	NA	NA	NA	NA	NA	NA	NA
NA	UBTD1	NA	NA	NA	NA	NA	NA	NA	NA	NA	NA	NA	NA	NA
NA	UCHL1	NA	NA	NA	NA	NA	NA	NA	NA	NA	NA	NA	NA	NA
NA	UFM1	NA	NA	NA	NA	NA	NA	NA	NA	NA	NA	NA	NA	NA
NA	ULBP1	NA	NA	NA	NA	NA	NA	NA	NA	NA	NA	NA	NA	NA
NA	ULBP2	NA	NA	NA	NA	NA	NA	NA	NA	NA	NA	NA	NA	NA
NA	UNC119	NA	NA	NA	NA	NA	NA	NA	NA	NA	NA	NA	NA	NA
NA	UNC13A	NA	NA	NA	NA	NA	NA	NA	NA	NA	NA	NA	NA	NA
NA	UNC13B	NA	NA	NA	NA	NA	NA	NA	NA	NA	NA	NA	NA	NA
NA	UNC93B1	NA	NA	NA	NA	NA	NA	NA	NA	NA	NA	NA	NA	NA
NA	UQCR11	NA	NA	NA	NA	NA	NA	NA	NA	NA	NA	NA	NA	NA
NA	USP35	NA	NA	NA	NA	NA	NA	NA	NA	NA	NA	NA	NA	NA
NA	USP53	NA	NA	NA	NA	NA	NA	NA	NA	NA	NA	NA	NA	NA
NA	USP6	NA	NA	NA	NA	NA	NA	NA	NA	NA	NA	NA	NA	NA
NA	UST	NA	NA	NA	NA	NA	NA	NA	NA	NA	NA	NA	NA	NA
NA	UTS2R	NA	NA	NA	NA	NA	NA	NA	NA	NA	NA	NA	NA	NA
NA	VAMP2	NA	NA	NA	NA	NA	NA	NA	NA	NA	NA	NA	NA	NA
NA	VAMP3	NA	NA	NA	NA	NA	NA	NA	NA	NA	NA	NA	NA	NA
NA	VAT1	NA	NA	NA	NA	NA	NA	NA	NA	NA	NA	NA	NA	NA
NA	VCPIP1	NA	NA	NA	NA	NA	NA	NA	NA	NA	NA	NA	NA	NA
NA	VDAC2	NA	NA	NA	NA	NA	NA	NA	NA	NA	NA	NA	NA	NA
NA	VGLL3	NA	NA	NA	NA	NA	NA	NA	NA	NA	NA	NA	NA	NA
NA	VKORC1	NA	NA	NA	NA	NA	NA	NA	NA	NA	NA	NA	NA	NA
NA	VLDLR	NA	NA	NA	NA	NA	NA	NA	NA	NA	NA	NA	NA	NA
NA	VN1R1	NA	NA	NA	NA	NA	NA	NA	NA	NA	NA	NA	NA	NA
NA	VNN1	NA	NA	NA	NA	NA	NA	NA	NA	NA	NA	NA	NA	NA
NA	VWCE	NA	NA	NA	NA	NA	NA	NA	NA	NA	NA	NA	NA	NA
NA	WDR26	NA	NA	NA	NA	NA	NA	NA	NA	NA	NA	NA	NA	NA
NA	WDR41	NA	NA	NA	NA	NA	NA	NA	NA	NA	NA	NA	NA	NA
NA	WDR44	NA	NA	NA	NA	NA	NA	NA	NA	NA	NA	NA	NA	NA
NA	WDR45	NA	NA	NA	NA	NA	NA	NA	NA	NA	NA	NA	NA	NA
NA	WDR60	NA	NA	NA	NA	NA	NA	NA	NA	NA	NA	NA	NA	NA
NA	WDR63	NA	NA	NA	NA	NA	NA	NA	NA	NA	NA	NA	NA	NA
NA	WDR66	NA	NA	NA	NA	NA	NA	NA	NA	NA	NA	NA	NA	NA
NA	WDR78	NA	NA	NA	NA	NA	NA	NA	NA	NA	NA	NA	NA	NA
NA	WIPI1	NA	NA	NA	NA	NA	NA	NA	NA	NA	NA	NA	NA	NA
NA	WIPI2	NA	NA	NA	NA	NA	NA	NA	NA	NA	NA	NA	NA	NA
NA	WLS	NA	NA	NA	NA	NA	NA	NA	NA	NA	NA	NA	NA	NA
NA	WNK1	NA	NA	NA	NA	NA	NA	NA	NA	NA	NA	NA	NA	NA
NA	WNT16	NA	NA	NA	NA	NA	NA	NA	NA	NA	NA	NA	NA	NA
NA	WNT5A	NA	NA	NA	NA	NA	NA	NA	NA	NA	NA	NA	NA	NA
NA	WNT5B	NA	NA	NA	NA	NA	NA	NA	NA	NA	NA	NA	NA	NA
NA	WNT9B	NA	NA	NA	NA	NA	NA	NA	NA	NA	NA	NA	NA	NA
NA	WRB	NA	NA	NA	NA	NA	NA	NA	NA	NA	NA	NA	NA	NA
NA	WSB1	NA	NA	NA	NA	NA	NA	NA	NA	NA	NA	NA	NA	NA
NA	XDH	NA	NA	NA	NA	NA	NA	NA	NA	NA	NA	NA	NA	NA
NA	XRCC4	NA	NA	NA	NA	NA	NA	NA	NA	NA	NA	NA	NA	NA
NA	XYLT1	NA	NA	NA	NA	NA	NA	NA	NA	NA	NA	NA	NA	NA
NA	XYLT2	NA	NA	NA	NA	NA	NA	NA	NA	NA	NA	NA	NA	NA
NA	YIF1B	NA	NA	NA	NA	NA	NA	NA	NA	NA	NA	NA	NA	NA
NA	YIPF5	NA	NA	NA	NA	NA	NA	NA	NA	NA	NA	NA	NA	NA
NA	YPEL2	NA	NA	NA	NA	NA	NA	NA	NA	NA	NA	NA	NA	NA
NA	YPEL3	NA	NA	NA	NA	NA	NA	NA	NA	NA	NA	NA	NA	NA
NA	YPEL5	NA	NA	NA	NA	NA	NA	NA	NA	NA	NA	NA	NA	NA
NA	ZBTB4	NA	NA	NA	NA	NA	NA	NA	NA	NA	NA	NA	NA	NA
NA	ZBTB46	NA	NA	NA	NA	NA	NA	NA	NA	NA	NA	NA	NA	NA
NA	ZBTB47	NA	NA	NA	NA	NA	NA	NA	NA	NA	NA	NA	NA	NA
NA	ZBTB7B	NA	NA	NA	NA	NA	NA	NA	NA	NA	NA	NA	NA	NA
NA	ZC3H12B	NA	NA	NA	NA	NA	NA	NA	NA	NA	NA	NA	NA	NA
NA	ZDBF2	NA	NA	NA	NA	NA	NA	NA	NA	NA	NA	NA	NA	NA
NA	ZDHHC1	NA	NA	NA	NA	NA	NA	NA	NA	NA	NA	NA	NA	NA
NA	ZDHHC14	NA	NA	NA	NA	NA	NA	NA	NA	NA	NA	NA	NA	NA
NA	ZDHHC23	NA	NA	NA	NA	NA	NA	NA	NA	NA	NA	NA	NA	NA
NA	ZDHHC24	NA	NA	NA	NA	NA	NA	NA	NA	NA	NA	NA	NA	NA
NA	ZDHHC9	NA	NA	NA	NA	NA	NA	NA	NA	NA	NA	NA	NA	NA
NA	ZER1	NA	NA	NA	NA	NA	NA	NA	NA	NA	NA	NA	NA	NA
NA	ZFAND2A	NA	NA	NA	NA	NA	NA	NA	NA	NA	NA	NA	NA	NA
NA	ZFAND3	NA	NA	NA	NA	NA	NA	NA	NA	NA	NA	NA	NA	NA
NA	ZFHX2	NA	NA	NA	NA	NA	NA	NA	NA	NA	NA	NA	NA	NA
NA	ZFHX3	NA	NA	NA	NA	NA	NA	NA	NA	NA	NA	NA	NA	NA
NA	ZFP28	NA	NA	NA	NA	NA	NA	NA	NA	NA	NA	NA	NA	NA
NA	ZG16B	NA	NA	NA	NA	NA	NA	NA	NA	NA	NA	NA	NA	NA
NA	ZHX3	NA	NA	NA	NA	NA	NA	NA	NA	NA	NA	NA	NA	NA
NA	ZMAT3	NA	NA	NA	NA	NA	NA	NA	NA	NA	NA	NA	NA	NA
NA	ZNF175	NA	NA	NA	NA	NA	NA	NA	NA	NA	NA	NA	NA	NA
NA	ZNF219	NA	NA	NA	NA	NA	NA	NA	NA	NA	NA	NA	NA	NA
NA	ZNF264	NA	NA	NA	NA	NA	NA	NA	NA	NA	NA	NA	NA	NA
NA	ZNF391	NA	NA	NA	NA	NA	NA	NA	NA	NA	NA	NA	NA	NA
NA	ZNF425	NA	NA	NA	NA	NA	NA	NA	NA	NA	NA	NA	NA	NA
NA	ZNF432	NA	NA	NA	NA	NA	NA	NA	NA	NA	NA	NA	NA	NA
NA	ZNF517	NA	NA	NA	NA	NA	NA	NA	NA	NA	NA	NA	NA	NA
NA	ZNF528	NA	NA	NA	NA	NA	NA	NA	NA	NA	NA	NA	NA	NA
NA	ZNF582	NA	NA	NA	NA	NA	NA	NA	NA	NA	NA	NA	NA	NA
NA	ZNF583	NA	NA	NA	NA	NA	NA	NA	NA	NA	NA	NA	NA	NA
NA	ZNF610	NA	NA	NA	NA	NA	NA	NA	NA	NA	NA	NA	NA	NA
NA	ZNF622	NA	NA	NA	NA	NA	NA	NA	NA	NA	NA	NA	NA	NA
NA	ZNF654	NA	NA	NA	NA	NA	NA	NA	NA	NA	NA	NA	NA	NA
NA	ZNF69	NA	NA	NA	NA	NA	NA	NA	NA	NA	NA	NA	NA	NA
NA	ZNF763	NA	NA	NA	NA	NA	NA	NA	NA	NA	NA	NA	NA	NA
NA	ZNFX1	NA	NA	NA	NA	NA	NA	NA	NA	NA	NA	NA	NA	NA
NA	ZP1	NA	NA	NA	NA	NA	NA	NA	NA	NA	NA	NA	NA	NA
NA	ZP2	NA	NA	NA	NA	NA	NA	NA	NA	NA	NA	NA	NA	NA
NA	ZPLD1	NA	NA	NA	NA	NA	NA	NA	NA	NA	NA	NA	NA	NA

## Sheet: GSE59861_3h_GSE55118
X1_sets_GSE55118_middle_vs_young	X1_sets_GSE55118_old_vs_young	X1_sets_GSE59861_3h_2Gy	X1_sets_GSE59861_3h_5cGy	X2_sets_GSE55118_middle_vs_young_GSE55118_old_vs_young	X2_sets_GSE55118_middle_vs_young_GSE59861_3h_2Gy	X2_sets_GSE55118_middle_vs_young_GSE59861_3h_5cGy	X2_sets_GSE55118_old_vs_young_GSE59861_3h_2Gy	X2_sets_GSE55118_old_vs_young_GSE59861_3h_5cGy	X2_sets_GSE59861_3h_2Gy_GSE59861_3h_5cGy	X3_sets_GSE55118_middle_vs_young_GSE55118_old_vs_young_GSE59861_3h_2Gy	X3_sets_GSE55118_middle_vs_young_GSE55118_old_vs_young_GSE59861_3h_5cGy	X3_sets_GSE55118_middle_vs_young_GSE59861_3h_2Gy_GSE59861_3h_5cGy	X3_sets_GSE55118_old_vs_young_GSE59861_3h_2Gy_GSE59861_3h_5cGy	X4_sets_GSE55118_middle_vs_young_GSE55118_old_vs_young_GSE59861_3h_2Gy_GSE59861_3h_5cGy
ABCB10	ABCG5	ABCB5	ADAMTSL1	ABHD13	KLK3	SUSD5	ALAS2	HLA-DPB2	FGF22	PKLR	NA	SUSD5	NA	NA
ABCE1	ABHD13	ABR	ASXL1	ANKRD33	KRTAP10-9	NA	ALDOB	NA	GDF15	VWA2	NA	NA	NA	NA
ABHD13	ABHD3	ADAM28	CXADR	ANP32C	PKLR	NA	ATF3	NA	PHLDB1	NA	NA	NA	NA	NA
ABHD5	ACBD5	ADAMTS19	CYP4F3	APIP	SSH1	NA	KRTAP5-2	NA	SMARCE1	NA	NA	NA	NA	NA
ACADM	ACOT12	ADH1C	DDX17	AQP8	SUSD5	NA	KRTAP5-5	NA	SPERT	NA	NA	NA	NA	NA
ACER2	ACTN3	AEN	ELF2	ATP2B3	VWA2	NA	PKLR	NA	SUSD5	NA	NA	NA	NA	NA
ACTR3C	ACTR3	AHCYL2	FGF22	C8ORF58	NA	NA	REEP1	NA	NA	NA	NA	NA	NA	NA
ACTRT2	ADAM9	AKAP13	GDF15	CD300A	NA	NA	VWA2	NA	NA	NA	NA	NA	NA	NA
AGXT	AFMID	AKT2	HBD	CHST4	NA	NA	NA	NA	NA	NA	NA	NA	NA	NA
AIF1L	ALAS2	ALAS2	HECTD2	CLDN16	NA	NA	NA	NA	NA	NA	NA	NA	NA	NA
AJAP1	ALDOB	ALDOB	HIPK2	CRYGD	NA	NA	NA	NA	NA	NA	NA	NA	NA	NA
ALOX15B	AMN1	ALOXE3	HLA-DPB2	DBF4B	NA	NA	NA	NA	NA	NA	NA	NA	NA	NA
ALS2CL	ANKRD12	ARHGEF3	ITGA5	EFNA1	NA	NA	NA	NA	NA	NA	NA	NA	NA	NA
AMPD3	ANKRD33	ASB10	NES	FAM81A	NA	NA	NA	NA	NA	NA	NA	NA	NA	NA
ANKRD33	ANP32C	ATF3	PHLDB1	FAM83E	NA	NA	NA	NA	NA	NA	NA	NA	NA	NA
ANO10	APIP	ATN1	PLXNB2	FOLR2	NA	NA	NA	NA	NA	NA	NA	NA	NA	NA
ANP32C	AQP8	ATP2C2	PPIL2	GABRA3	NA	NA	NA	NA	NA	NA	NA	NA	NA	NA
AP1M2	ARGLU1	ATP6V0E2	RPH3AL	GBGT1	NA	NA	NA	NA	NA	NA	NA	NA	NA	NA
APIP	ART3	AUP1	SASH1	GNG8	NA	NA	NA	NA	NA	NA	NA	NA	NA	NA
AQP8	ATF3	BAIAP2	SFSWAP	H1FOO	NA	NA	NA	NA	NA	NA	NA	NA	NA	NA
ARHGAP33	ATMIN	BBC3	SLFN5	HCRTR1	NA	NA	NA	NA	NA	NA	NA	NA	NA	NA
ARL6IP6	ATP2B3	BTG2	SMARCE1	HERC3	NA	NA	NA	NA	NA	NA	NA	NA	NA	NA
ASTL	ATXN10	C15ORF56	SPATA2	IL18BP	NA	NA	NA	NA	NA	NA	NA	NA	NA	NA
ATP2B3	AZI2	C18ORF12	SPEN	JAK3	NA	NA	NA	NA	NA	NA	NA	NA	NA	NA
ATP8B3	BLNK	CA9	SPERT	KIAA0040	NA	NA	NA	NA	NA	NA	NA	NA	NA	NA
ATXN1	BPNT1	CCDC113	SUSD5	KRTAP3-1	NA	NA	NA	NA	NA	NA	NA	NA	NA	NA
BBS7	BRSK2	CCL20	TCF7L2	LCE3C	NA	NA	NA	NA	NA	NA	NA	NA	NA	NA
BCOR	BRWD1	CD93	TMC6	LCNL1	NA	NA	NA	NA	NA	NA	NA	NA	NA	NA
BHLHE23	C1ORF127	CDKN1A	TOMM40L	LONRF3	NA	NA	NA	NA	NA	NA	NA	NA	NA	NA
C10ORF120	C1ORF194	CELA1	TRIO	LRRC27	NA	NA	NA	NA	NA	NA	NA	NA	NA	NA
C16ORF71	C1QTNF6	CENPI	USP29	MFNG	NA	NA	NA	NA	NA	NA	NA	NA	NA	NA
C1ORF189	C7	CEP78	NA	MTMR14	NA	NA	NA	NA	NA	NA	NA	NA	NA	NA
C8ORF58	C8ORF58	CES4A	NA	MUSK	NA	NA	NA	NA	NA	NA	NA	NA	NA	NA
C9ORF40	CACNA1I	CIDEB	NA	MYEOV	NA	NA	NA	NA	NA	NA	NA	NA	NA	NA
CALML4	CAMSAP1	CNTFR	NA	OR7C2	NA	NA	NA	NA	NA	NA	NA	NA	NA	NA
CANX	CCDC34	COG6	NA	OTUD6A	NA	NA	NA	NA	NA	NA	NA	NA	NA	NA
CAPZA2	CCL18	CPNE4	NA	PACRGL	NA	NA	NA	NA	NA	NA	NA	NA	NA	NA
CAV3	CCL7	CPSF1	NA	PAX7	NA	NA	NA	NA	NA	NA	NA	NA	NA	NA
CCDC58	CCR1	CRHR2	NA	PKLR	NA	NA	NA	NA	NA	NA	NA	NA	NA	NA
CCDC82	CD300A	CRISPLD2	NA	PPP6R2	NA	NA	NA	NA	NA	NA	NA	NA	NA	NA
CCT5	CD300E	DAPK1	NA	PRSS22	NA	NA	NA	NA	NA	NA	NA	NA	NA	NA
CD163	CDH13	DAPK2	NA	PTPN6	NA	NA	NA	NA	NA	NA	NA	NA	NA	NA
CD300A	CGRRF1	DCST1	NA	RETN	NA	NA	NA	NA	NA	NA	NA	NA	NA	NA
CD8B	CHIT1	DCUN1D3	NA	SLC14A2	NA	NA	NA	NA	NA	NA	NA	NA	NA	NA
CDH3	CHST4	DMRT3	NA	SLC23A3	NA	NA	NA	NA	NA	NA	NA	NA	NA	NA
CDK10	CISD1	DPPA4	NA	SLC30A3	NA	NA	NA	NA	NA	NA	NA	NA	NA	NA
CDR1	CLDN16	DSG1	NA	SLC32A1	NA	NA	NA	NA	NA	NA	NA	NA	NA	NA
CHRNB3	CLDN6	EDEM3	NA	SLC6A5	NA	NA	NA	NA	NA	NA	NA	NA	NA	NA
CHST4	CLDND2	EFNB3	NA	SNRPD2P2	NA	NA	NA	NA	NA	NA	NA	NA	NA	NA
CLCN1	CMPK2	ELAVL1	NA	ST8SIA3	NA	NA	NA	NA	NA	NA	NA	NA	NA	NA
CLDN16	CNGB1	ELMOD3	NA	TFAM	NA	NA	NA	NA	NA	NA	NA	NA	NA	NA
CLDN3	COL11A2	EPB41L1	NA	TTLL9	NA	NA	NA	NA	NA	NA	NA	NA	NA	NA
COMMD6	COL19A1	EPB41L4B	NA	VPREB3	NA	NA	NA	NA	NA	NA	NA	NA	NA	NA
CRYGD	COL4A4	EPHA2	NA	VWA2	NA	NA	NA	NA	NA	NA	NA	NA	NA	NA
CXCL5	COLEC11	ERG	NA	WDFY4	NA	NA	NA	NA	NA	NA	NA	NA	NA	NA
DBF4B	COX6B2	FAM43A	NA	WDR38	NA	NA	NA	NA	NA	NA	NA	NA	NA	NA
DCAF12L2	CPLX2	FBXO44	NA	WNT1	NA	NA	NA	NA	NA	NA	NA	NA	NA	NA
DEFB129	CRYGD	FGF22	NA	WNT4	NA	NA	NA	NA	NA	NA	NA	NA	NA	NA
DEK	CSMD1	FXN	NA	ZC3H12D	NA	NA	NA	NA	NA	NA	NA	NA	NA	NA
DNA2	CTSS	GADD45A	NA	ZIC4	NA	NA	NA	NA	NA	NA	NA	NA	NA	NA
DPRX	CYP19A1	GCK	NA	ZNF560	NA	NA	NA	NA	NA	NA	NA	NA	NA	NA
EFNA1	D2HGDH	GDF15	NA	ZSCAN1	NA	NA	NA	NA	NA	NA	NA	NA	NA	NA
EIF2AK3	DBF4B	HEXA	NA	NA	NA	NA	NA	NA	NA	NA	NA	NA	NA	NA
ERI2	DBI	HIC1	NA	NA	NA	NA	NA	NA	NA	NA	NA	NA	NA	NA
FAM120C	DDX27	HNF4A	NA	NA	NA	NA	NA	NA	NA	NA	NA	NA	NA	NA
FAM124A	DDX58	HNMT	NA	NA	NA	NA	NA	NA	NA	NA	NA	NA	NA	NA
FAM3C	DENND4C	HSF5	NA	NA	NA	NA	NA	NA	NA	NA	NA	NA	NA	NA
FAM81A	DISP2	ICK	NA	NA	NA	NA	NA	NA	NA	NA	NA	NA	NA	NA
FAM83E	DLK1	IER5	NA	NA	NA	NA	NA	NA	NA	NA	NA	NA	NA	NA
FCN3	DLL1	IGF1	NA	NA	NA	NA	NA	NA	NA	NA	NA	NA	NA	NA
FER1L5	DNAH14	IGSF6	NA	NA	NA	NA	NA	NA	NA	NA	NA	NA	NA	NA
FEZ2	DNASE1L2	IL17RE	NA	NA	NA	NA	NA	NA	NA	NA	NA	NA	NA	NA
FGF1	DNM3	IL2RG	NA	NA	NA	NA	NA	NA	NA	NA	NA	NA	NA	NA
FGFR3	DTWD1	KCNJ3	NA	NA	NA	NA	NA	NA	NA	NA	NA	NA	NA	NA
FMN2	EBP	KCNN1	NA	NA	NA	NA	NA	NA	NA	NA	NA	NA	NA	NA
FOLR2	ECEL1	KLK12	NA	NA	NA	NA	NA	NA	NA	NA	NA	NA	NA	NA
FOXD1	EFCAB6	KLK2	NA	NA	NA	NA	NA	NA	NA	NA	NA	NA	NA	NA
FRMD3	EFNA1	KLK3	NA	NA	NA	NA	NA	NA	NA	NA	NA	NA	NA	NA
GABRA3	ENHO	KPNA7	NA	NA	NA	NA	NA	NA	NA	NA	NA	NA	NA	NA
GBGT1	EPPK1	KRT13	NA	NA	NA	NA	NA	NA	NA	NA	NA	NA	NA	NA
GLB1L3	ESCO1	KRT17	NA	NA	NA	NA	NA	NA	NA	NA	NA	NA	NA	NA
GNG8	ESRP1	KRT36	NA	NA	NA	NA	NA	NA	NA	NA	NA	NA	NA	NA
GNL2	FAM184A	KRT40	NA	NA	NA	NA	NA	NA	NA	NA	NA	NA	NA	NA
GPR137C	FAM81A	KRTAP10-9	NA	NA	NA	NA	NA	NA	NA	NA	NA	NA	NA	NA
GPSM3	FAM83E	KRTAP5-2	NA	NA	NA	NA	NA	NA	NA	NA	NA	NA	NA	NA
H1FOO	FFAR2	KRTAP5-5	NA	NA	NA	NA	NA	NA	NA	NA	NA	NA	NA	NA
H2AFV	FIBCD1	L3MBTL4	NA	NA	NA	NA	NA	NA	NA	NA	NA	NA	NA	NA
HAUS6	FKTN	LCA5L	NA	NA	NA	NA	NA	NA	NA	NA	NA	NA	NA	NA
HCRTR1	FOLR2	LCE1E	NA	NA	NA	NA	NA	NA	NA	NA	NA	NA	NA	NA
HERC3	FRS3	LILRA2	NA	NA	NA	NA	NA	NA	NA	NA	NA	NA	NA	NA
HES6	FTHL17	MAP3K14	NA	NA	NA	NA	NA	NA	NA	NA	NA	NA	NA	NA
HIP1R	FTMT	MAPK4	NA	NA	NA	NA	NA	NA	NA	NA	NA	NA	NA	NA
HMGB2	GABRA3	MCTP2	NA	NA	NA	NA	NA	NA	NA	NA	NA	NA	NA	NA
HNF1B	GAL	MICAL3	NA	NA	NA	NA	NA	NA	NA	NA	NA	NA	NA	NA
HSPH1	GBGT1	MST1R	NA	NA	NA	NA	NA	NA	NA	NA	NA	NA	NA	NA
IL18BP	GCNT2	MTA1	NA	NA	NA	NA	NA	NA	NA	NA	NA	NA	NA	NA
JAK3	GLDN	MYO1G	NA	NA	NA	NA	NA	NA	NA	NA	NA	NA	NA	NA
JARID2	GNG8	NDST3	NA	NA	NA	NA	NA	NA	NA	NA	NA	NA	NA	NA
KIAA0040	GPC3	NINJ2	NA	NA	NA	NA	NA	NA	NA	NA	NA	NA	NA	NA
KIAA0232	GPR15	NIPAL2	NA	NA	NA	NA	NA	NA	NA	NA	NA	NA	NA	NA
KIAA1324L	GPR17	NOS3	NA	NA	NA	NA	NA	NA	NA	NA	NA	NA	NA	NA
KIF1C	GPR50	NTHL1	NA	NA	NA	NA	NA	NA	NA	NA	NA	NA	NA	NA
KIF21A	GRHL2	NUDCD3	NA	NA	NA	NA	NA	NA	NA	NA	NA	NA	NA	NA
KIF21B	GRIN2C	OR13C9	NA	NA	NA	NA	NA	NA	NA	NA	NA	NA	NA	NA
KLF16	GSG1	OR1A2	NA	NA	NA	NA	NA	NA	NA	NA	NA	NA	NA	NA
KLF5	H1FOO	OR1L3	NA	NA	NA	NA	NA	NA	NA	NA	NA	NA	NA	NA
KLK3	HCRTR1	OR2G2	NA	NA	NA	NA	NA	NA	NA	NA	NA	NA	NA	NA
KRT32	HERC3	OSM	NA	NA	NA	NA	NA	NA	NA	NA	NA	NA	NA	NA
KRTAP10-10	HEXB	OTUD7B	NA	NA	NA	NA	NA	NA	NA	NA	NA	NA	NA	NA
KRTAP10-9	HLA-DOA	PCDHA5	NA	NA	NA	NA	NA	NA	NA	NA	NA	NA	NA	NA
KRTAP3-1	HLA-DPB2	PCDHB9	NA	NA	NA	NA	NA	NA	NA	NA	NA	NA	NA	NA
LCE3B	HLA-DQB1	PCP4L1	NA	NA	NA	NA	NA	NA	NA	NA	NA	NA	NA	NA
LCE3C	HSPA6	PDLIM5	NA	NA	NA	NA	NA	NA	NA	NA	NA	NA	NA	NA
LCE3D	HSPB7	PDZD11	NA	NA	NA	NA	NA	NA	NA	NA	NA	NA	NA	NA
LCK	IFI16	PHLDB1	NA	NA	NA	NA	NA	NA	NA	NA	NA	NA	NA	NA
LCNL1	IGFL3	PIK3CG	NA	NA	NA	NA	NA	NA	NA	NA	NA	NA	NA	NA
LENG8	IL18BP	PIK3R3	NA	NA	NA	NA	NA	NA	NA	NA	NA	NA	NA	NA
LMNB1	INTS8	PIP	NA	NA	NA	NA	NA	NA	NA	NA	NA	NA	NA	NA
LMO1	ITIH1	PITPNM2	NA	NA	NA	NA	NA	NA	NA	NA	NA	NA	NA	NA
LONRF3	JAK3	PIWIL2	NA	NA	NA	NA	NA	NA	NA	NA	NA	NA	NA	NA
LRRC27	JKAMP	PKLR	NA	NA	NA	NA	NA	NA	NA	NA	NA	NA	NA	NA
LRRC42	KCNV1	PLXNB3	NA	NA	NA	NA	NA	NA	NA	NA	NA	NA	NA	NA
LTA	KIAA0040	POLH	NA	NA	NA	NA	NA	NA	NA	NA	NA	NA	NA	NA
LY86	KIAA1958	POM121L2	NA	NA	NA	NA	NA	NA	NA	NA	NA	NA	NA	NA
LYPLA1	KIR3DX1	PPM1D	NA	NA	NA	NA	NA	NA	NA	NA	NA	NA	NA	NA
LYSMD3	KISS1	PPP1R1C	NA	NA	NA	NA	NA	NA	NA	NA	NA	NA	NA	NA
MAPK12	KLC2	PRKCG	NA	NA	NA	NA	NA	NA	NA	NA	NA	NA	NA	NA
MARK1	KLF15	PRMT8	NA	NA	NA	NA	NA	NA	NA	NA	NA	NA	NA	NA
MBOAT1	KRT31	PSG1	NA	NA	NA	NA	NA	NA	NA	NA	NA	NA	NA	NA
MDGA2	KRTAP3-1	PSTK	NA	NA	NA	NA	NA	NA	NA	NA	NA	NA	NA	NA
MERTK	KRTAP5-10	RAP2B	NA	NA	NA	NA	NA	NA	NA	NA	NA	NA	NA	NA
MFNG	KRTAP5-2	RAPGEFL1	NA	NA	NA	NA	NA	NA	NA	NA	NA	NA	NA	NA
MFSD6	KRTAP5-5	RASGRP1	NA	NA	NA	NA	NA	NA	NA	NA	NA	NA	NA	NA
MPRIP	KRTAP6-2	RECQL5	NA	NA	NA	NA	NA	NA	NA	NA	NA	NA	NA	NA
MRS2	LARP7	REEP1	NA	NA	NA	NA	NA	NA	NA	NA	NA	NA	NA	NA
MTHFD2L	LCE1B	RGS5	NA	NA	NA	NA	NA	NA	NA	NA	NA	NA	NA	NA
MTMR14	LCE3C	RRP1B	NA	NA	NA	NA	NA	NA	NA	NA	NA	NA	NA	NA
MUSK	LCNL1	RTKN	NA	NA	NA	NA	NA	NA	NA	NA	NA	NA	NA	NA
MYADML2	LIAS	SDHA	NA	NA	NA	NA	NA	NA	NA	NA	NA	NA	NA	NA
MYEOV	LIG4	SESN1	NA	NA	NA	NA	NA	NA	NA	NA	NA	NA	NA	NA
NETO1	LIPM	SESN2	NA	NA	NA	NA	NA	NA	NA	NA	NA	NA	NA	NA
NQO1	LONRF3	SHKBP1	NA	NA	NA	NA	NA	NA	NA	NA	NA	NA	NA	NA
NRIP3	LRG1	SLC22A7	NA	NA	NA	NA	NA	NA	NA	NA	NA	NA	NA	NA
NUPL2	LRRC27	SLC30A8	NA	NA	NA	NA	NA	NA	NA	NA	NA	NA	NA	NA
OLFM1	LRTM1	SLC36A2	NA	NA	NA	NA	NA	NA	NA	NA	NA	NA	NA	NA
OPN3	MALT1	SLC38A7	NA	NA	NA	NA	NA	NA	NA	NA	NA	NA	NA	NA
OR10C1	MAP3K13	SMARCE1	NA	NA	NA	NA	NA	NA	NA	NA	NA	NA	NA	NA
OR3A3	MATN3	SMG6	NA	NA	NA	NA	NA	NA	NA	NA	NA	NA	NA	NA
OR4D11	MCF2L	SNX18	NA	NA	NA	NA	NA	NA	NA	NA	NA	NA	NA	NA
OR7C2	MED22	SOBP	NA	NA	NA	NA	NA	NA	NA	NA	NA	NA	NA	NA
OTUD6A	MFNG	SOX2	NA	NA	NA	NA	NA	NA	NA	NA	NA	NA	NA	NA
OXSR1	MLANA	SPAG6	NA	NA	NA	NA	NA	NA	NA	NA	NA	NA	NA	NA
PACRGL	MMP25	SPDEF	NA	NA	NA	NA	NA	NA	NA	NA	NA	NA	NA	NA
PARP1	MRAP	SPERT	NA	NA	NA	NA	NA	NA	NA	NA	NA	NA	NA	NA
PAX7	MSX2	SPN	NA	NA	NA	NA	NA	NA	NA	NA	NA	NA	NA	NA
PAXIP1	MTMR14	SPRR2F	NA	NA	NA	NA	NA	NA	NA	NA	NA	NA	NA	NA
PCDH1	MUC2	SSH1	NA	NA	NA	NA	NA	NA	NA	NA	NA	NA	NA	NA
PCDHB13	MUSK	SUSD5	NA	NA	NA	NA	NA	NA	NA	NA	NA	NA	NA	NA
PCMT1	MYEOV	SYN2	NA	NA	NA	NA	NA	NA	NA	NA	NA	NA	NA	NA
PER3	NCK1	SYT8	NA	NA	NA	NA	NA	NA	NA	NA	NA	NA	NA	NA
PHLDA1	NDOR1	TAOK2	NA	NA	NA	NA	NA	NA	NA	NA	NA	NA	NA	NA
PHLDB2	NDUFA10	TBXAS1	NA	NA	NA	NA	NA	NA	NA	NA	NA	NA	NA	NA
PI4K2B	NHSL2	THPO	NA	NA	NA	NA	NA	NA	NA	NA	NA	NA	NA	NA
PIGW	NIPSNAP3B	TMC5	NA	NA	NA	NA	NA	NA	NA	NA	NA	NA	NA	NA
PKLR	NOVA2	TMEM126B	NA	NA	NA	NA	NA	NA	NA	NA	NA	NA	NA	NA
PLK2	NPFFR1	TMEM161B	NA	NA	NA	NA	NA	NA	NA	NA	NA	NA	NA	NA
PLLP	NTNG1	TMEM217	NA	NA	NA	NA	NA	NA	NA	NA	NA	NA	NA	NA
PODXL	OR10G8	TMEM45B	NA	NA	NA	NA	NA	NA	NA	NA	NA	NA	NA	NA
POLD3	OR10H1	TOB1	NA	NA	NA	NA	NA	NA	NA	NA	NA	NA	NA	NA
PPAT	OR1E1	TRDMT1	NA	NA	NA	NA	NA	NA	NA	NA	NA	NA	NA	NA
PPP4R1L	OR51B6	TRPC5	NA	NA	NA	NA	NA	NA	NA	NA	NA	NA	NA	NA
PPP6R2	OR5A1	TTC21A	NA	NA	NA	NA	NA	NA	NA	NA	NA	NA	NA	NA
PRPS2	OR7C1	UGT3A2	NA	NA	NA	NA	NA	NA	NA	NA	NA	NA	NA	NA
PRSS22	OR7C2	VWA2	NA	NA	NA	NA	NA	NA	NA	NA	NA	NA	NA	NA
PTGES3	ORMDL1	WFDC3	NA	NA	NA	NA	NA	NA	NA	NA	NA	NA	NA	NA
PTMA	OTOP2	XIRP1	NA	NA	NA	NA	NA	NA	NA	NA	NA	NA	NA	NA
PTPN3	OTP	ZFAT	NA	NA	NA	NA	NA	NA	NA	NA	NA	NA	NA	NA
PTPN6	OTUD6A	ZFC3H1	NA	NA	NA	NA	NA	NA	NA	NA	NA	NA	NA	NA
RAB18	PABPC3	ZNF638	NA	NA	NA	NA	NA	NA	NA	NA	NA	NA	NA	NA
RAMP3	PACRGL	ZNF692	NA	NA	NA	NA	NA	NA	NA	NA	NA	NA	NA	NA
RASA2	PATE1	ZNRF4	NA	NA	NA	NA	NA	NA	NA	NA	NA	NA	NA	NA
RAVER1	PAX7	NA	NA	NA	NA	NA	NA	NA	NA	NA	NA	NA	NA	NA
RBM6	PBX1	NA	NA	NA	NA	NA	NA	NA	NA	NA	NA	NA	NA	NA
RCC2	PCGF3	NA	NA	NA	NA	NA	NA	NA	NA	NA	NA	NA	NA	NA
RETN	PFDN4	NA	NA	NA	NA	NA	NA	NA	NA	NA	NA	NA	NA	NA
RFWD3	PGC	NA	NA	NA	NA	NA	NA	NA	NA	NA	NA	NA	NA	NA
RGL3	PGLYRP2	NA	NA	NA	NA	NA	NA	NA	NA	NA	NA	NA	NA	NA
RHOA	PGR	NA	NA	NA	NA	NA	NA	NA	NA	NA	NA	NA	NA	NA
RPL13P5	PKLR	NA	NA	NA	NA	NA	NA	NA	NA	NA	NA	NA	NA	NA
RRN3	PLSCR1	NA	NA	NA	NA	NA	NA	NA	NA	NA	NA	NA	NA	NA
SACM1L	PLXNA4	NA	NA	NA	NA	NA	NA	NA	NA	NA	NA	NA	NA	NA
SCGB3A1	POM121L12	NA	NA	NA	NA	NA	NA	NA	NA	NA	NA	NA	NA	NA
SCOC	PPP1R16B	NA	NA	NA	NA	NA	NA	NA	NA	NA	NA	NA	NA	NA
SERAC1	PPP6R2	NA	NA	NA	NA	NA	NA	NA	NA	NA	NA	NA	NA	NA
SFI1	PRKAA2	NA	NA	NA	NA	NA	NA	NA	NA	NA	NA	NA	NA	NA
SFMBT1	PRKY	NA	NA	NA	NA	NA	NA	NA	NA	NA	NA	NA	NA	NA
SHISA7	PROM2	NA	NA	NA	NA	NA	NA	NA	NA	NA	NA	NA	NA	NA
SLC14A2	PRRG2	NA	NA	NA	NA	NA	NA	NA	NA	NA	NA	NA	NA	NA
SLC17A3	PRSS22	NA	NA	NA	NA	NA	NA	NA	NA	NA	NA	NA	NA	NA
SLC23A3	PTPN6	NA	NA	NA	NA	NA	NA	NA	NA	NA	NA	NA	NA	NA
SLC2A1	RAB27A	NA	NA	NA	NA	NA	NA	NA	NA	NA	NA	NA	NA	NA
SLC30A3	RAB37	NA	NA	NA	NA	NA	NA	NA	NA	NA	NA	NA	NA	NA
SLC32A1	RABEP1	NA	NA	NA	NA	NA	NA	NA	NA	NA	NA	NA	NA	NA
SLC35A3	RASSF4	NA	NA	NA	NA	NA	NA	NA	NA	NA	NA	NA	NA	NA
SLC6A5	REEP1	NA	NA	NA	NA	NA	NA	NA	NA	NA	NA	NA	NA	NA
SLCO2A1	RETN	NA	NA	NA	NA	NA	NA	NA	NA	NA	NA	NA	NA	NA
SMC3	RETSAT	NA	NA	NA	NA	NA	NA	NA	NA	NA	NA	NA	NA	NA
SMC5	RHOQ	NA	NA	NA	NA	NA	NA	NA	NA	NA	NA	NA	NA	NA
SMCR8	RIPK3	NA	NA	NA	NA	NA	NA	NA	NA	NA	NA	NA	NA	NA
SNORA71C	RNF212	NA	NA	NA	NA	NA	NA	NA	NA	NA	NA	NA	NA	NA
SNRPD2P2	RNF216	NA	NA	NA	NA	NA	NA	NA	NA	NA	NA	NA	NA	NA
SPNS3	RNFT2	NA	NA	NA	NA	NA	NA	NA	NA	NA	NA	NA	NA	NA
SPRR3	RPP25	NA	NA	NA	NA	NA	NA	NA	NA	NA	NA	NA	NA	NA
SSH1	SAMD13	NA	NA	NA	NA	NA	NA	NA	NA	NA	NA	NA	NA	NA
ST8SIA3	SCPEP1	NA	NA	NA	NA	NA	NA	NA	NA	NA	NA	NA	NA	NA
STAG1	SCT	NA	NA	NA	NA	NA	NA	NA	NA	NA	NA	NA	NA	NA
SUSD5	SCUBE1	NA	NA	NA	NA	NA	NA	NA	NA	NA	NA	NA	NA	NA
SYTL1	SEC14L4	NA	NA	NA	NA	NA	NA	NA	NA	NA	NA	NA	NA	NA
TACR2	SESTD1	NA	NA	NA	NA	NA	NA	NA	NA	NA	NA	NA	NA	NA
TANK	SH2D1A	NA	NA	NA	NA	NA	NA	NA	NA	NA	NA	NA	NA	NA
TAOK3	SHMT1	NA	NA	NA	NA	NA	NA	NA	NA	NA	NA	NA	NA	NA
TCF23	SIGLEC14	NA	NA	NA	NA	NA	NA	NA	NA	NA	NA	NA	NA	NA
TCTEX1D4	SLC14A2	NA	NA	NA	NA	NA	NA	NA	NA	NA	NA	NA	NA	NA
TDRD10	SLC15A2	NA	NA	NA	NA	NA	NA	NA	NA	NA	NA	NA	NA	NA
TFAM	SLC22A1	NA	NA	NA	NA	NA	NA	NA	NA	NA	NA	NA	NA	NA
TFDP1	SLC23A3	NA	NA	NA	NA	NA	NA	NA	NA	NA	NA	NA	NA	NA
TFF2	SLC25A15	NA	NA	NA	NA	NA	NA	NA	NA	NA	NA	NA	NA	NA
TGFBR1	SLC29A4	NA	NA	NA	NA	NA	NA	NA	NA	NA	NA	NA	NA	NA
TH	SLC2A13	NA	NA	NA	NA	NA	NA	NA	NA	NA	NA	NA	NA	NA
THBS3	SLC30A3	NA	NA	NA	NA	NA	NA	NA	NA	NA	NA	NA	NA	NA
TM4SF5	SLC30A6	NA	NA	NA	NA	NA	NA	NA	NA	NA	NA	NA	NA	NA
TMEM19	SLC32A1	NA	NA	NA	NA	NA	NA	NA	NA	NA	NA	NA	NA	NA
TMEM87B	SLC35F5	NA	NA	NA	NA	NA	NA	NA	NA	NA	NA	NA	NA	NA
TMPRSS6	SLC38A1	NA	NA	NA	NA	NA	NA	NA	NA	NA	NA	NA	NA	NA
TOPBP1	SLC5A10	NA	NA	NA	NA	NA	NA	NA	NA	NA	NA	NA	NA	NA
TRMT6	SLC5A2	NA	NA	NA	NA	NA	NA	NA	NA	NA	NA	NA	NA	NA
TRPM7	SLC6A5	NA	NA	NA	NA	NA	NA	NA	NA	NA	NA	NA	NA	NA
TSFM	SMCHD1	NA	NA	NA	NA	NA	NA	NA	NA	NA	NA	NA	NA	NA
TSN	SNRPD2P2	NA	NA	NA	NA	NA	NA	NA	NA	NA	NA	NA	NA	NA
TTC9B	SNX14	NA	NA	NA	NA	NA	NA	NA	NA	NA	NA	NA	NA	NA
TTLL9	SPAG7	NA	NA	NA	NA	NA	NA	NA	NA	NA	NA	NA	NA	NA
TUBGCP3	ST7L	NA	NA	NA	NA	NA	NA	NA	NA	NA	NA	NA	NA	NA
UBA2	ST8SIA3	NA	NA	NA	NA	NA	NA	NA	NA	NA	NA	NA	NA	NA
UBE2B	STAG2	NA	NA	NA	NA	NA	NA	NA	NA	NA	NA	NA	NA	NA
UBXN4	STEAP1	NA	NA	NA	NA	NA	NA	NA	NA	NA	NA	NA	NA	NA
URB2	SYPL1	NA	NA	NA	NA	NA	NA	NA	NA	NA	NA	NA	NA	NA
USP1	TACC2	NA	NA	NA	NA	NA	NA	NA	NA	NA	NA	NA	NA	NA
VAV2	TCEANC	NA	NA	NA	NA	NA	NA	NA	NA	NA	NA	NA	NA	NA
VPREB3	TCFL5	NA	NA	NA	NA	NA	NA	NA	NA	NA	NA	NA	NA	NA
VWA2	TDP2	NA	NA	NA	NA	NA	NA	NA	NA	NA	NA	NA	NA	NA
WDFY4	TERF1	NA	NA	NA	NA	NA	NA	NA	NA	NA	NA	NA	NA	NA
WDR38	TEX101	NA	NA	NA	NA	NA	NA	NA	NA	NA	NA	NA	NA	NA
WNT1	TFAM	NA	NA	NA	NA	NA	NA	NA	NA	NA	NA	NA	NA	NA
WNT4	TFR2	NA	NA	NA	NA	NA	NA	NA	NA	NA	NA	NA	NA	NA
XPO1	TMEM38B	NA	NA	NA	NA	NA	NA	NA	NA	NA	NA	NA	NA	NA
ZC3H12D	TMEM50B	NA	NA	NA	NA	NA	NA	NA	NA	NA	NA	NA	NA	NA
ZC3H13	TNFRSF18	NA	NA	NA	NA	NA	NA	NA	NA	NA	NA	NA	NA	NA
ZDHHC5	TNFRSF4	NA	NA	NA	NA	NA	NA	NA	NA	NA	NA	NA	NA	NA
ZIC4	TOMM20L	NA	NA	NA	NA	NA	NA	NA	NA	NA	NA	NA	NA	NA
ZNF205	TOR1B	NA	NA	NA	NA	NA	NA	NA	NA	NA	NA	NA	NA	NA
ZNF365	TPO	NA	NA	NA	NA	NA	NA	NA	NA	NA	NA	NA	NA	NA
ZNF367	TRAF1	NA	NA	NA	NA	NA	NA	NA	NA	NA	NA	NA	NA	NA
ZNF479	TREX2	NA	NA	NA	NA	NA	NA	NA	NA	NA	NA	NA	NA	NA
ZNF560	TRIM29	NA	NA	NA	NA	NA	NA	NA	NA	NA	NA	NA	NA	NA
ZNF680	TRIM62	NA	NA	NA	NA	NA	NA	NA	NA	NA	NA	NA	NA	NA
ZSCAN1	TRPM3	NA	NA	NA	NA	NA	NA	NA	NA	NA	NA	NA	NA	NA
ZYG11A	TRPM5	NA	NA	NA	NA	NA	NA	NA	NA	NA	NA	NA	NA	NA
NA	TRPV5	NA	NA	NA	NA	NA	NA	NA	NA	NA	NA	NA	NA	NA
NA	TSPAN15	NA	NA	NA	NA	NA	NA	NA	NA	NA	NA	NA	NA	NA
NA	TTC16	NA	NA	NA	NA	NA	NA	NA	NA	NA	NA	NA	NA	NA
NA	TTC39A	NA	NA	NA	NA	NA	NA	NA	NA	NA	NA	NA	NA	NA
NA	TTL	NA	NA	NA	NA	NA	NA	NA	NA	NA	NA	NA	NA	NA
NA	TTLL9	NA	NA	NA	NA	NA	NA	NA	NA	NA	NA	NA	NA	NA
NA	UBE2G2	NA	NA	NA	NA	NA	NA	NA	NA	NA	NA	NA	NA	NA
NA	UBR4	NA	NA	NA	NA	NA	NA	NA	NA	NA	NA	NA	NA	NA
NA	UNC13A	NA	NA	NA	NA	NA	NA	NA	NA	NA	NA	NA	NA	NA
NA	UNC5CL	NA	NA	NA	NA	NA	NA	NA	NA	NA	NA	NA	NA	NA
NA	VGLL2	NA	NA	NA	NA	NA	NA	NA	NA	NA	NA	NA	NA	NA
NA	VMAC	NA	NA	NA	NA	NA	NA	NA	NA	NA	NA	NA	NA	NA
NA	VPREB3	NA	NA	NA	NA	NA	NA	NA	NA	NA	NA	NA	NA	NA
NA	VSTM2A	NA	NA	NA	NA	NA	NA	NA	NA	NA	NA	NA	NA	NA
NA	VWA2	NA	NA	NA	NA	NA	NA	NA	NA	NA	NA	NA	NA	NA
NA	WASF3	NA	NA	NA	NA	NA	NA	NA	NA	NA	NA	NA	NA	NA
NA	WDFY4	NA	NA	NA	NA	NA	NA	NA	NA	NA	NA	NA	NA	NA
NA	WDR38	NA	NA	NA	NA	NA	NA	NA	NA	NA	NA	NA	NA	NA
NA	WFDC2	NA	NA	NA	NA	NA	NA	NA	NA	NA	NA	NA	NA	NA
NA	WNK3	NA	NA	NA	NA	NA	NA	NA	NA	NA	NA	NA	NA	NA
NA	WNT1	NA	NA	NA	NA	NA	NA	NA	NA	NA	NA	NA	NA	NA
NA	WNT4	NA	NA	NA	NA	NA	NA	NA	NA	NA	NA	NA	NA	NA
NA	ZBTB8OS	NA	NA	NA	NA	NA	NA	NA	NA	NA	NA	NA	NA	NA
NA	ZC3H12D	NA	NA	NA	NA	NA	NA	NA	NA	NA	NA	NA	NA	NA
NA	ZCRB1	NA	NA	NA	NA	NA	NA	NA	NA	NA	NA	NA	NA	NA
NA	ZFP2	NA	NA	NA	NA	NA	NA	NA	NA	NA	NA	NA	NA	NA
NA	ZIC4	NA	NA	NA	NA	NA	NA	NA	NA	NA	NA	NA	NA	NA
NA	ZNF420	NA	NA	NA	NA	NA	NA	NA	NA	NA	NA	NA	NA	NA
NA	ZNF430	NA	NA	NA	NA	NA	NA	NA	NA	NA	NA	NA	NA	NA
NA	ZNF560	NA	NA	NA	NA	NA	NA	NA	NA	NA	NA	NA	NA	NA
NA	ZSCAN1	NA	NA	NA	NA	NA	NA	NA	NA	NA	NA	NA	NA	NA

## Sheet: GSE59861_6h_EMTAB2086
X1_sets_EMTAB2086_70_vs_30	X1_sets_EMTAB2086_80_vs_30	X1_sets_GSE59861_6h_2Gy	X1_sets_GSE59861_6h_5cGy	X2_sets_EMTAB2086_70_vs_30_EMTAB2086_80_vs_30	X2_sets_EMTAB2086_70_vs_30_GSE59861_6h_2Gy	X2_sets_EMTAB2086_70_vs_30_GSE59861_6h_5cGy	X2_sets_EMTAB2086_80_vs_30_GSE59861_6h_2Gy	X2_sets_EMTAB2086_80_vs_30_GSE59861_6h_5cGy	X2_sets_GSE59861_6h_2Gy_GSE59861_6h_5cGy	X3_sets_EMTAB2086_70_vs_30_EMTAB2086_80_vs_30_GSE59861_6h_2Gy	X3_sets_EMTAB2086_70_vs_30_EMTAB2086_80_vs_30_GSE59861_6h_5cGy	X3_sets_EMTAB2086_70_vs_30_GSE59861_6h_2Gy_GSE59861_6h_5cGy	X3_sets_EMTAB2086_80_vs_30_GSE59861_6h_2Gy_GSE59861_6h_5cGy	X4_sets_EMTAB2086_70_vs_30_EMTAB2086_80_vs_30_GSE59861_6h_2Gy_GSE59861_6h_5cGy
ABCA2	A2M	ACOT8	ABLIM1	ABCA2	BCL2L1	CHAC1	BCL2L1	ABLIM1	C12ORF65	BCL2L1	PRDM1	CHAC1	RRAGC	NA
ABCB1	ABAT	ARHGEF3	ADAM12	ABCB1	BLOC1S2	PRDM1	BLOC1S2	ADAM12	CHAC1	BLOC1S2	SHC3	SESN2	STC2	NA
ABL2	ABCA12	BCL2L1	AKT2	ABL2	CDKN1A	SESN2	CDKN1A	DLL1	DDIT3	CDKN1A	NA	NA	ZNF425	NA
ACTBL2	ABCA2	BLOC1S2	APCDD1	ACTBL2	CHAC1	SHC3	EDA2R	PRDM1	DDIT4	EDA2R	NA	NA	NA	NA
ACTR10	ABCA3	C12ORF65	BCDIN3D	ACTR10	EBF3	TRAF1	FAS	RCOR3	KCNE4	FAS	NA	NA	NA	NA
ACYP2	ABCA4	C21ORF91	BCL2L11	ACYP2	EDA2R	NA	GDF15	RRAGC	PLXNB2	GDF15	NA	NA	NA	NA
ADAM19	ABCA7	CDCA3	BDKRB2	ADAM19	FAS	NA	KRT17	SHC3	RRAGC	MDM2	NA	NA	NA	NA
ADAMTS12	ABCB1	CDKN1A	C12ORF65	ADAMTS12	GDF15	NA	MDM2	STC2	SESN2	NIPAL2	NA	NA	NA	NA
ADAMTSL5	ABCD1	CHAC1	C1ORF74	ADAMTSL5	MDM2	NA	NIPAL2	TAOK2	SPATA2	OSBPL3	NA	NA	NA	NA
ADD3	ABHD12	CLPX	CCDC96	AGRN	NIPAL2	NA	OSBPL3	ZNF425	STC2	PAG1	NA	NA	NA	NA
AGRN	ABL2	CPSF6	CH25H	AHNAK2	OSBPL3	NA	PAG1	NA	ZNF425	PSTPIP2	NA	NA	NA	NA
AHNAK2	ABLIM1	DDC	CHAC1	AIG1	PAG1	NA	PALMD	NA	ZNF773	SESN1	NA	NA	NA	NA
AIG1	ABLIM3	DDIT3	DCP1B	ANGPT1	PSTPIP2	NA	POLH	NA	NA	TMEM217	NA	NA	NA	NA
ANGPT1	ABTB2	DDIT4	DDIT3	ANGPTL4	SESN1	NA	POU2F2	NA	NA	TNFRSF10B	NA	NA	NA	NA
ANGPTL4	ACAA1	E2F7	DDIT4	ANKH	SESN2	NA	PSTPIP2	NA	NA	TNFRSF10D	NA	NA	NA	NA
ANKH	ACER1	EBF3	DLL1	ANKRA2	TMEM217	NA	RRAGC	NA	NA	TP53INP1	NA	NA	NA	NA
ANKRA2	ACER2	EDA2R	DNAI1	ANKRD1	TNFRSF10B	NA	SESN1	NA	NA	WDR66	NA	NA	NA	NA
ANKRD1	ACOX1	ERC1	EGFR	ANKRD42	TNFRSF10D	NA	SLC25A23	NA	NA	ZMAT3	NA	NA	NA	NA
ANKRD42	ACSL5	FAS	HECTD2	ANKRD44	TP53INP1	NA	STC2	NA	NA	NA	NA	NA	NA	NA
ANKRD44	ACTBL2	FRMD4A	IP6K1	ANO10	WDR66	NA	TMEM217	NA	NA	NA	NA	NA	NA	NA
ANO10	ACTR10	GDF15	ISL2	ANXA4	ZMAT3	NA	TNFRSF10B	NA	NA	NA	NA	NA	NA	NA
ANO6	ACVR2A	GDF5	KCNE4	APBB2	NA	NA	TNFRSF10D	NA	NA	NA	NA	NA	NA	NA
ANXA4	ACYP2	HAS3	MAF	ARHGAP26	NA	NA	TP53INP1	NA	NA	NA	NA	NA	NA	NA
APBB2	ADAM12	HKR1	MAVS	ARHGAP31	NA	NA	WDR66	NA	NA	NA	NA	NA	NA	NA
ARHGAP10	ADAM19	HMGA2	MBP	ARHGAP5	NA	NA	ZMAT3	NA	NA	NA	NA	NA	NA	NA
ARHGAP26	ADAM23	HSPA14	MTMR3	ARRDC1	NA	NA	ZNF425	NA	NA	NA	NA	NA	NA	NA
ARHGAP31	ADAM32	KCNE4	NIT1	ARSK	NA	NA	NA	NA	NA	NA	NA	NA	NA	NA
ARHGAP5	ADAMTS12	KLK3	NSD1	ASAH1	NA	NA	NA	NA	NA	NA	NA	NA	NA	NA
ARRDC1	ADAMTS13	KRT17	OLFML2B	ASAP2	NA	NA	NA	NA	NA	NA	NA	NA	NA	NA
ARSK	ADAMTSL4	LCA5L	PCID2	ASCC3	NA	NA	NA	NA	NA	NA	NA	NA	NA	NA
ASAH1	ADAMTSL5	MALAT1	PLXNB2	ATP10A	NA	NA	NA	NA	NA	NA	NA	NA	NA	NA
ASAP2	ADCK2	MAN2C1	PRDM1	ATP11A	NA	NA	NA	NA	NA	NA	NA	NA	NA	NA
ASCC3	ADCY6	MDM2	RAD54L2	ATP13A2	NA	NA	NA	NA	NA	NA	NA	NA	NA	NA
ATP10A	ADHFE1	NIPAL2	RAPGEF6	ATP6AP2	NA	NA	NA	NA	NA	NA	NA	NA	NA	NA
ATP11A	ADIPOR1	OR5AU1	RCOR3	ATP6V0A1	NA	NA	NA	NA	NA	NA	NA	NA	NA	NA
ATP13A2	ADRA2C	OSBPL3	RIPK4	ATP9A	NA	NA	NA	NA	NA	NA	NA	NA	NA	NA
ATP6AP2	ADRB2	PAG1	RRAGC	B4GALNT1	NA	NA	NA	NA	NA	NA	NA	NA	NA	NA
ATP6V0A1	AES	PALMD	SESN2	BACH1	NA	NA	NA	NA	NA	NA	NA	NA	NA	NA
ATP9A	AFAP1	PCNA	SHC3	BAIAP2L1	NA	NA	NA	NA	NA	NA	NA	NA	NA	NA
B2M	AFF1	PHLDA1	SNHG12	BANK1	NA	NA	NA	NA	NA	NA	NA	NA	NA	NA
B4GALNT1	AGRN	PITPNM2	SOX4	BBS2	NA	NA	NA	NA	NA	NA	NA	NA	NA	NA
BAALC	AGXT	PLXNB2	SPATA2	BCL2L1	NA	NA	NA	NA	NA	NA	NA	NA	NA	NA
BACH1	AHCYL2	POLH	STC2	BHLHE40	NA	NA	NA	NA	NA	NA	NA	NA	NA	NA
BAIAP2L1	AHNAK2	POU2F2	TAOK2	BLCAP	NA	NA	NA	NA	NA	NA	NA	NA	NA	NA
BANK1	AIG1	PPM1D	TMEM177	BLOC1S2	NA	NA	NA	NA	NA	NA	NA	NA	NA	NA
BAX	AK4	PSTPIP2	TRAF1	BLZF1	NA	NA	NA	NA	NA	NA	NA	NA	NA	NA
BBS2	AKAP6	RPP38	TXLNG	BPGM	NA	NA	NA	NA	NA	NA	NA	NA	NA	NA
BBS9	ALDH5A1	RPS27A	UBTF	BTG2	NA	NA	NA	NA	NA	NA	NA	NA	NA	NA
BCL2L1	ALDOAP2	RRAGC	ZBTB7A	BTN2A2	NA	NA	NA	NA	NA	NA	NA	NA	NA	NA
BHLHE40	ALKBH6	SDHA	ZCCHC14	BTRC	NA	NA	NA	NA	NA	NA	NA	NA	NA	NA
BIRC3	ALPK2	SESN1	ZMIZ1	C14ORF28	NA	NA	NA	NA	NA	NA	NA	NA	NA	NA
BLCAP	ALS2CL	SESN2	ZNF232	C1ORF54	NA	NA	NA	NA	NA	NA	NA	NA	NA	NA
BLOC1S2	AMIGO1	SLC25A23	ZNF275	C3ORF35	NA	NA	NA	NA	NA	NA	NA	NA	NA	NA
BLZF1	AMIGO2	SPATA19	ZNF425	C3ORF52	NA	NA	NA	NA	NA	NA	NA	NA	NA	NA
BPGM	AMPD1	SPATA2	ZNF549	C4ORF3	NA	NA	NA	NA	NA	NA	NA	NA	NA	NA
BTBD3	AMPD3	SSH2	ZNF585A	C4ORF36	NA	NA	NA	NA	NA	NA	NA	NA	NA	NA
BTG2	AMZ1	STC2	ZNF773	C5AR1	NA	NA	NA	NA	NA	NA	NA	NA	NA	NA
BTN2A2	ANGPT1	STOM	ZNF785	C5ORF15	NA	NA	NA	NA	NA	NA	NA	NA	NA	NA
BTRC	ANGPTL4	SUSD5	NA	C5ORF46	NA	NA	NA	NA	NA	NA	NA	NA	NA	NA
C14ORF28	ANK1	TMEM217	NA	C7	NA	NA	NA	NA	NA	NA	NA	NA	NA	NA
C16ORF72	ANK2	TNFRSF10B	NA	CACNA2D1	NA	NA	NA	NA	NA	NA	NA	NA	NA	NA
C1ORF54	ANKH	TNFRSF10D	NA	CADM3	NA	NA	NA	NA	NA	NA	NA	NA	NA	NA
C2CD2	ANKRA2	TOMM40L	NA	CALCOCO1	NA	NA	NA	NA	NA	NA	NA	NA	NA	NA
C3ORF35	ANKRD1	TP53INP1	NA	CALD1	NA	NA	NA	NA	NA	NA	NA	NA	NA	NA
C3ORF52	ANKRD29	TRIAP1	NA	CAMTA2	NA	NA	NA	NA	NA	NA	NA	NA	NA	NA
C4ORF3	ANKRD37	TRIM4	NA	CAP2	NA	NA	NA	NA	NA	NA	NA	NA	NA	NA
C4ORF36	ANKRD42	TSPAN32	NA	CASS4	NA	NA	NA	NA	NA	NA	NA	NA	NA	NA
C5AR1	ANKRD44	UBE3C	NA	CCDC81	NA	NA	NA	NA	NA	NA	NA	NA	NA	NA
C5ORF15	ANKRD46	VPS29	NA	CCIN	NA	NA	NA	NA	NA	NA	NA	NA	NA	NA
C5ORF46	ANKRD52	WDR33	NA	CCL2	NA	NA	NA	NA	NA	NA	NA	NA	NA	NA
C7	ANKS1B	WDR66	NA	CCND1	NA	NA	NA	NA	NA	NA	NA	NA	NA	NA
CACNA2D1	ANO10	ZMAT3	NA	CCND2	NA	NA	NA	NA	NA	NA	NA	NA	NA	NA
CADM3	ANTXR1	ZNF337	NA	CD109	NA	NA	NA	NA	NA	NA	NA	NA	NA	NA
CALCOCO1	ANXA4	ZNF419	NA	CD46	NA	NA	NA	NA	NA	NA	NA	NA	NA	NA
CALD1	ANXA6	ZNF425	NA	CD63	NA	NA	NA	NA	NA	NA	NA	NA	NA	NA
CAMTA2	APBB2	ZNF77	NA	CD9	NA	NA	NA	NA	NA	NA	NA	NA	NA	NA
CAP2	APH1B	ZNF773	NA	CDH13	NA	NA	NA	NA	NA	NA	NA	NA	NA	NA
CASS4	APLP1	ZRSR2	NA	CDK6	NA	NA	NA	NA	NA	NA	NA	NA	NA	NA
CCDC81	APOD	NA	NA	CDKN1A	NA	NA	NA	NA	NA	NA	NA	NA	NA	NA
CCIN	AQP4	NA	NA	CDKN2B	NA	NA	NA	NA	NA	NA	NA	NA	NA	NA
CCL2	AR	NA	NA	CDYL2	NA	NA	NA	NA	NA	NA	NA	NA	NA	NA
CCND1	AREG	NA	NA	CENPT	NA	NA	NA	NA	NA	NA	NA	NA	NA	NA
CCND2	ARHGAP24	NA	NA	CERCAM	NA	NA	NA	NA	NA	NA	NA	NA	NA	NA
CD109	ARHGAP26	NA	NA	CFL2	NA	NA	NA	NA	NA	NA	NA	NA	NA	NA
CD46	ARHGAP29	NA	NA	CFLAR	NA	NA	NA	NA	NA	NA	NA	NA	NA	NA
CD63	ARHGAP31	NA	NA	CHIC2	NA	NA	NA	NA	NA	NA	NA	NA	NA	NA
CD82	ARHGAP5	NA	NA	CHPF	NA	NA	NA	NA	NA	NA	NA	NA	NA	NA
CD9	ARHGAP9	NA	NA	CHRNA1	NA	NA	NA	NA	NA	NA	NA	NA	NA	NA
CDC42EP3	ARHGDIB	NA	NA	CHST11	NA	NA	NA	NA	NA	NA	NA	NA	NA	NA
CDH13	ARHGEF37	NA	NA	CITED2	NA	NA	NA	NA	NA	NA	NA	NA	NA	NA
CDK6	ARHGEF4	NA	NA	CLDN1	NA	NA	NA	NA	NA	NA	NA	NA	NA	NA
CDKN1A	ARL6IP5	NA	NA	CLDN16	NA	NA	NA	NA	NA	NA	NA	NA	NA	NA
CDKN2B	ARMCX3	NA	NA	CLN5	NA	NA	NA	NA	NA	NA	NA	NA	NA	NA
CDYL2	ARRDC1	NA	NA	CLN8	NA	NA	NA	NA	NA	NA	NA	NA	NA	NA
CENPT	ARRDC4	NA	NA	CLTB	NA	NA	NA	NA	NA	NA	NA	NA	NA	NA
CERCAM	ARSA	NA	NA	CMBL	NA	NA	NA	NA	NA	NA	NA	NA	NA	NA
CFH	ARSD	NA	NA	CMIP	NA	NA	NA	NA	NA	NA	NA	NA	NA	NA
CFL2	ARSG	NA	NA	CMPK1	NA	NA	NA	NA	NA	NA	NA	NA	NA	NA
CFLAR	ARSK	NA	NA	CNIH3	NA	NA	NA	NA	NA	NA	NA	NA	NA	NA
CHAC1	ARV1	NA	NA	CNNM1	NA	NA	NA	NA	NA	NA	NA	NA	NA	NA
CHIC2	ASAH1	NA	NA	COBLL1	NA	NA	NA	NA	NA	NA	NA	NA	NA	NA
CHPF	ASAP2	NA	NA	COG6	NA	NA	NA	NA	NA	NA	NA	NA	NA	NA
CHRNA1	ASB16	NA	NA	COL11A1	NA	NA	NA	NA	NA	NA	NA	NA	NA	NA
CHST11	ASCC3	NA	NA	COL8A1	NA	NA	NA	NA	NA	NA	NA	NA	NA	NA
CHST7	ASL	NA	NA	COPZ2	NA	NA	NA	NA	NA	NA	NA	NA	NA	NA
CITED2	ATAD1	NA	NA	COQ10B	NA	NA	NA	NA	NA	NA	NA	NA	NA	NA
CLDN1	ATG4A	NA	NA	CPEB2	NA	NA	NA	NA	NA	NA	NA	NA	NA	NA
CLDN12	ATL1	NA	NA	CPEB4	NA	NA	NA	NA	NA	NA	NA	NA	NA	NA
CLDN16	ATL3	NA	NA	CPPED1	NA	NA	NA	NA	NA	NA	NA	NA	NA	NA
CLN5	ATOX1	NA	NA	CREB3	NA	NA	NA	NA	NA	NA	NA	NA	NA	NA
CLN8	ATP10A	NA	NA	CSGALNACT2	NA	NA	NA	NA	NA	NA	NA	NA	NA	NA
CLTB	ATP10D	NA	NA	CST3	NA	NA	NA	NA	NA	NA	NA	NA	NA	NA
CMBL	ATP11A	NA	NA	CTBS	NA	NA	NA	NA	NA	NA	NA	NA	NA	NA
CMIP	ATP13A2	NA	NA	CTGF	NA	NA	NA	NA	NA	NA	NA	NA	NA	NA
CMPK1	ATP2B4	NA	NA	CTSO	NA	NA	NA	NA	NA	NA	NA	NA	NA	NA
CNIH3	ATP2C1	NA	NA	CTSZ	NA	NA	NA	NA	NA	NA	NA	NA	NA	NA
CNNM1	ATP6AP1	NA	NA	CXCL10	NA	NA	NA	NA	NA	NA	NA	NA	NA	NA
CNST	ATP6AP2	NA	NA	CYB5R1	NA	NA	NA	NA	NA	NA	NA	NA	NA	NA
CNTN3	ATP6V0A1	NA	NA	CYBA	NA	NA	NA	NA	NA	NA	NA	NA	NA	NA
COBLL1	ATP6V0A4	NA	NA	CYBRD1	NA	NA	NA	NA	NA	NA	NA	NA	NA	NA
COG5	ATP6V0E1	NA	NA	CYFIP2	NA	NA	NA	NA	NA	NA	NA	NA	NA	NA
COG6	ATP6V1E1	NA	NA	CYP2U1	NA	NA	NA	NA	NA	NA	NA	NA	NA	NA
COL11A1	ATP6V1G1	NA	NA	CYR61	NA	NA	NA	NA	NA	NA	NA	NA	NA	NA
COL6A1	ATP7B	NA	NA	DAP	NA	NA	NA	NA	NA	NA	NA	NA	NA	NA
COL8A1	ATP9A	NA	NA	DDR2	NA	NA	NA	NA	NA	NA	NA	NA	NA	NA
COPZ2	ATRN	NA	NA	DDX58	NA	NA	NA	NA	NA	NA	NA	NA	NA	NA
COQ10B	ATRNL1	NA	NA	DGKA	NA	NA	NA	NA	NA	NA	NA	NA	NA	NA
CPEB2	B3GAT2	NA	NA	DGKI	NA	NA	NA	NA	NA	NA	NA	NA	NA	NA
CPEB4	B3GAT3	NA	NA	DHRS7	NA	NA	NA	NA	NA	NA	NA	NA	NA	NA
CPPED1	B3GNT4	NA	NA	DMD	NA	NA	NA	NA	NA	NA	NA	NA	NA	NA
CREB3	B3GNT9	NA	NA	DMPK	NA	NA	NA	NA	NA	NA	NA	NA	NA	NA
CSGALNACT2	B4GALNT1	NA	NA	DNAJB4	NA	NA	NA	NA	NA	NA	NA	NA	NA	NA
CST3	B4GALT1	NA	NA	DNAJB9	NA	NA	NA	NA	NA	NA	NA	NA	NA	NA
CTAGE1	B4GALT7	NA	NA	DNAJC6	NA	NA	NA	NA	NA	NA	NA	NA	NA	NA
CTBS	BACH1	NA	NA	DNASE1L1	NA	NA	NA	NA	NA	NA	NA	NA	NA	NA
CTGF	BAD	NA	NA	DOCK9	NA	NA	NA	NA	NA	NA	NA	NA	NA	NA
CTHRC1	BAIAP2L1	NA	NA	DOK1	NA	NA	NA	NA	NA	NA	NA	NA	NA	NA
CTSK	BANK1	NA	NA	DRAM1	NA	NA	NA	NA	NA	NA	NA	NA	NA	NA
CTSO	BBS2	NA	NA	DRP2	NA	NA	NA	NA	NA	NA	NA	NA	NA	NA
CTSZ	BCAS3	NA	NA	DSP	NA	NA	NA	NA	NA	NA	NA	NA	NA	NA
CXCL10	BCL2L1	NA	NA	DUSP3	NA	NA	NA	NA	NA	NA	NA	NA	NA	NA
CYB5R1	BHLHE40	NA	NA	DUSP6	NA	NA	NA	NA	NA	NA	NA	NA	NA	NA
CYBA	BLCAP	NA	NA	DYNLT3	NA	NA	NA	NA	NA	NA	NA	NA	NA	NA
CYBRD1	BLOC1S2	NA	NA	EBI3	NA	NA	NA	NA	NA	NA	NA	NA	NA	NA
CYFIP2	BLZF1	NA	NA	ECM1	NA	NA	NA	NA	NA	NA	NA	NA	NA	NA
CYLD	BMP1	NA	NA	EDA2R	NA	NA	NA	NA	NA	NA	NA	NA	NA	NA
CYP2U1	BMP2	NA	NA	EDEM3	NA	NA	NA	NA	NA	NA	NA	NA	NA	NA
CYR61	BMP6	NA	NA	EDIL3	NA	NA	NA	NA	NA	NA	NA	NA	NA	NA
DAP	BMPER	NA	NA	EDN1	NA	NA	NA	NA	NA	NA	NA	NA	NA	NA
DDR2	BPGM	NA	NA	EGR2	NA	NA	NA	NA	NA	NA	NA	NA	NA	NA
DDX58	BSDC1	NA	NA	ELFN1	NA	NA	NA	NA	NA	NA	NA	NA	NA	NA
DGKA	BTBD1	NA	NA	ENC1	NA	NA	NA	NA	NA	NA	NA	NA	NA	NA
DGKI	BTBD9	NA	NA	EPHA2	NA	NA	NA	NA	NA	NA	NA	NA	NA	NA
DHRS7	BTG2	NA	NA	EPHX4	NA	NA	NA	NA	NA	NA	NA	NA	NA	NA
DMD	BTN2A2	NA	NA	EPS8L2	NA	NA	NA	NA	NA	NA	NA	NA	NA	NA
DMPK	BTRC	NA	NA	ERLEC1	NA	NA	NA	NA	NA	NA	NA	NA	NA	NA
DNAJB4	C11ORF87	NA	NA	ERP44	NA	NA	NA	NA	NA	NA	NA	NA	NA	NA
DNAJB9	C12ORF57	NA	NA	ERRFI1	NA	NA	NA	NA	NA	NA	NA	NA	NA	NA
DNAJC28	C14ORF28	NA	NA	ETHE1	NA	NA	NA	NA	NA	NA	NA	NA	NA	NA
DNAJC6	C16ORF74	NA	NA	ETNK2	NA	NA	NA	NA	NA	NA	NA	NA	NA	NA
DNASE1L1	C19ORF18	NA	NA	ETV5	NA	NA	NA	NA	NA	NA	NA	NA	NA	NA
DOCK9	C1ORF53	NA	NA	EVI5	NA	NA	NA	NA	NA	NA	NA	NA	NA	NA
DOK1	C1ORF54	NA	NA	EXPH5	NA	NA	NA	NA	NA	NA	NA	NA	NA	NA
DRAM1	C1QTNF7	NA	NA	EXTL1	NA	NA	NA	NA	NA	NA	NA	NA	NA	NA
DRP2	C20ORF194	NA	NA	F3	NA	NA	NA	NA	NA	NA	NA	NA	NA	NA
DSP	C21ORF62	NA	NA	FABP3	NA	NA	NA	NA	NA	NA	NA	NA	NA	NA
DUSP14	C2ORF66	NA	NA	FADS3	NA	NA	NA	NA	NA	NA	NA	NA	NA	NA
DUSP3	C3	NA	NA	FAM151B	NA	NA	NA	NA	NA	NA	NA	NA	NA	NA
DUSP6	C3ORF35	NA	NA	FAM174A	NA	NA	NA	NA	NA	NA	NA	NA	NA	NA
DUSP8	C3ORF52	NA	NA	FAM43A	NA	NA	NA	NA	NA	NA	NA	NA	NA	NA
DYNLT3	C3ORF70	NA	NA	FAP	NA	NA	NA	NA	NA	NA	NA	NA	NA	NA
EBF3	C4ORF3	NA	NA	FAR2	NA	NA	NA	NA	NA	NA	NA	NA	NA	NA
EBI3	C4ORF36	NA	NA	FAS	NA	NA	NA	NA	NA	NA	NA	NA	NA	NA
ECM1	C5AR1	NA	NA	FBN1	NA	NA	NA	NA	NA	NA	NA	NA	NA	NA
EDA2R	C5ORF15	NA	NA	FBN2	NA	NA	NA	NA	NA	NA	NA	NA	NA	NA
EDEM3	C5ORF46	NA	NA	FBXL2	NA	NA	NA	NA	NA	NA	NA	NA	NA	NA
EDIL3	C6ORF222	NA	NA	FCGRT	NA	NA	NA	NA	NA	NA	NA	NA	NA	NA
EDN1	C7	NA	NA	FCHSD2	NA	NA	NA	NA	NA	NA	NA	NA	NA	NA
EFNB2	C8ORF34	NA	NA	FER1L4	NA	NA	NA	NA	NA	NA	NA	NA	NA	NA
EGR2	C9ORF131	NA	NA	FGD4	NA	NA	NA	NA	NA	NA	NA	NA	NA	NA
ELFN1	C9ORF170	NA	NA	FHOD3	NA	NA	NA	NA	NA	NA	NA	NA	NA	NA
ENC1	CACNA1C	NA	NA	FLT1	NA	NA	NA	NA	NA	NA	NA	NA	NA	NA
EPHA2	CACNA2D1	NA	NA	FMN1	NA	NA	NA	NA	NA	NA	NA	NA	NA	NA
EPHX4	CACNA2D3	NA	NA	FMOD	NA	NA	NA	NA	NA	NA	NA	NA	NA	NA
EPRS	CACNG6	NA	NA	FNDC3B	NA	NA	NA	NA	NA	NA	NA	NA	NA	NA
EPS8L2	CADM3	NA	NA	FNDC4	NA	NA	NA	NA	NA	NA	NA	NA	NA	NA
ERAP2	CALCA	NA	NA	FOXE1	NA	NA	NA	NA	NA	NA	NA	NA	NA	NA
ERLEC1	CALCOCO1	NA	NA	FRMD6	NA	NA	NA	NA	NA	NA	NA	NA	NA	NA
ERP44	CALCOCO2	NA	NA	FRY	NA	NA	NA	NA	NA	NA	NA	NA	NA	NA
ERRFI1	CALD1	NA	NA	FSTL3	NA	NA	NA	NA	NA	NA	NA	NA	NA	NA
ETHE1	CAMK1D	NA	NA	FZD6	NA	NA	NA	NA	NA	NA	NA	NA	NA	NA
ETNK2	CAMLG	NA	NA	GADD45A	NA	NA	NA	NA	NA	NA	NA	NA	NA	NA
ETV5	CAMP	NA	NA	GALNT10	NA	NA	NA	NA	NA	NA	NA	NA	NA	NA
EVI5	CAMTA2	NA	NA	GALNT5	NA	NA	NA	NA	NA	NA	NA	NA	NA	NA
EXPH5	CAP2	NA	NA	GAS6	NA	NA	NA	NA	NA	NA	NA	NA	NA	NA
EXTL1	CAPN6	NA	NA	GATA3	NA	NA	NA	NA	NA	NA	NA	NA	NA	NA
F3	CAPNS2	NA	NA	GBE1	NA	NA	NA	NA	NA	NA	NA	NA	NA	NA
FABP3	CAPS	NA	NA	GCNT2	NA	NA	NA	NA	NA	NA	NA	NA	NA	NA
FADS3	CASS4	NA	NA	GCNT4	NA	NA	NA	NA	NA	NA	NA	NA	NA	NA
FAM151B	CATSPERG	NA	NA	GDF15	NA	NA	NA	NA	NA	NA	NA	NA	NA	NA
FAM174A	CBLN3	NA	NA	GDF6	NA	NA	NA	NA	NA	NA	NA	NA	NA	NA
FAM43A	CCDC113	NA	NA	GDPD1	NA	NA	NA	NA	NA	NA	NA	NA	NA	NA
FAP	CCDC153	NA	NA	GFPT1	NA	NA	NA	NA	NA	NA	NA	NA	NA	NA
FAR2	CCDC50	NA	NA	GIPC1	NA	NA	NA	NA	NA	NA	NA	NA	NA	NA
FAS	CCDC68	NA	NA	GK5	NA	NA	NA	NA	NA	NA	NA	NA	NA	NA
FBLIM1	CCDC69	NA	NA	GOLGB1	NA	NA	NA	NA	NA	NA	NA	NA	NA	NA
FBN1	CCDC80	NA	NA	GPR108	NA	NA	NA	NA	NA	NA	NA	NA	NA	NA
FBN2	CCDC81	NA	NA	GPR137B	NA	NA	NA	NA	NA	NA	NA	NA	NA	NA
FBXL2	CCDC90B	NA	NA	GPR155	NA	NA	NA	NA	NA	NA	NA	NA	NA	NA
FCGRT	CCIN	NA	NA	GRAMD1B	NA	NA	NA	NA	NA	NA	NA	NA	NA	NA
FCHSD2	CCL2	NA	NA	GSN	NA	NA	NA	NA	NA	NA	NA	NA	NA	NA
FER1L4	CCL28	NA	NA	GSTM3	NA	NA	NA	NA	NA	NA	NA	NA	NA	NA
FGD4	CCND1	NA	NA	GSTO1	NA	NA	NA	NA	NA	NA	NA	NA	NA	NA
FGF1	CCND2	NA	NA	GYS1	NA	NA	NA	NA	NA	NA	NA	NA	NA	NA
FHOD3	CCNDBP1	NA	NA	H6PD	NA	NA	NA	NA	NA	NA	NA	NA	NA	NA
FLT1	CD109	NA	NA	HCN2	NA	NA	NA	NA	NA	NA	NA	NA	NA	NA
FMN1	CD14	NA	NA	HDAC9	NA	NA	NA	NA	NA	NA	NA	NA	NA	NA
FMOD	CD151	NA	NA	HEATR5A	NA	NA	NA	NA	NA	NA	NA	NA	NA	NA
FNDC3B	CD163L1	NA	NA	HECW1	NA	NA	NA	NA	NA	NA	NA	NA	NA	NA
FNDC4	CD46	NA	NA	HECW2	NA	NA	NA	NA	NA	NA	NA	NA	NA	NA
FNIP2	CD55	NA	NA	HEXB	NA	NA	NA	NA	NA	NA	NA	NA	NA	NA
FOXC1	CD58	NA	NA	HHAT	NA	NA	NA	NA	NA	NA	NA	NA	NA	NA
FOXE1	CD59	NA	NA	HINT3	NA	NA	NA	NA	NA	NA	NA	NA	NA	NA
FRMD6	CD63	NA	NA	HIST1H2BK	NA	NA	NA	NA	NA	NA	NA	NA	NA	NA
FRS2	CD9	NA	NA	HIVEP1	NA	NA	NA	NA	NA	NA	NA	NA	NA	NA
FRY	CDC42BPB	NA	NA	HIVEP2	NA	NA	NA	NA	NA	NA	NA	NA	NA	NA
FSTL3	CDCP1	NA	NA	HK2	NA	NA	NA	NA	NA	NA	NA	NA	NA	NA
FZD6	CDH1	NA	NA	HLA-F	NA	NA	NA	NA	NA	NA	NA	NA	NA	NA
GADD45A	CDH10	NA	NA	HM13	NA	NA	NA	NA	NA	NA	NA	NA	NA	NA
GALNT10	CDH13	NA	NA	HSD17B14	NA	NA	NA	NA	NA	NA	NA	NA	NA	NA
GALNT5	CDH22	NA	NA	ICAM4	NA	NA	NA	NA	NA	NA	NA	NA	NA	NA
GARS	CDIPT	NA	NA	ICAM5	NA	NA	NA	NA	NA	NA	NA	NA	NA	NA
GAS6	CDK6	NA	NA	IDS	NA	NA	NA	NA	NA	NA	NA	NA	NA	NA
GATA3	CDKL3	NA	NA	IDUA	NA	NA	NA	NA	NA	NA	NA	NA	NA	NA
GBE1	CDKL4	NA	NA	IFI27L2	NA	NA	NA	NA	NA	NA	NA	NA	NA	NA
GBP3	CDKN1A	NA	NA	IFI30	NA	NA	NA	NA	NA	NA	NA	NA	NA	NA
GCNT2	CDKN2A	NA	NA	IFI6	NA	NA	NA	NA	NA	NA	NA	NA	NA	NA
GCNT4	CDKN2B	NA	NA	IGDCC4	NA	NA	NA	NA	NA	NA	NA	NA	NA	NA
GDF15	CDNF	NA	NA	IGF2R	NA	NA	NA	NA	NA	NA	NA	NA	NA	NA
GDF6	CDYL2	NA	NA	IGFBP7	NA	NA	NA	NA	NA	NA	NA	NA	NA	NA
GDPD1	CELF2	NA	NA	IL32	NA	NA	NA	NA	NA	NA	NA	NA	NA	NA
GFPT1	CENPT	NA	NA	IL6	NA	NA	NA	NA	NA	NA	NA	NA	NA	NA
GGCX	CERCAM	NA	NA	INA	NA	NA	NA	NA	NA	NA	NA	NA	NA	NA
GIPC1	CES2	NA	NA	INHBB	NA	NA	NA	NA	NA	NA	NA	NA	NA	NA
GK5	CES4A	NA	NA	INPP5A	NA	NA	NA	NA	NA	NA	NA	NA	NA	NA
GLT6D1	CFD	NA	NA	ITGAV	NA	NA	NA	NA	NA	NA	NA	NA	NA	NA
GOLGB1	CFL2	NA	NA	ITGB5	NA	NA	NA	NA	NA	NA	NA	NA	NA	NA
GOPC	CFLAR	NA	NA	ITPR2	NA	NA	NA	NA	NA	NA	NA	NA	NA	NA
GPC1	CGREF1	NA	NA	ITPRIPL2	NA	NA	NA	NA	NA	NA	NA	NA	NA	NA
GPR108	CHIC2	NA	NA	KCNH1	NA	NA	NA	NA	NA	NA	NA	NA	NA	NA
GPR137B	CHMP4C	NA	NA	KCNK6	NA	NA	NA	NA	NA	NA	NA	NA	NA	NA
GPR155	CHPF	NA	NA	KCNN2	NA	NA	NA	NA	NA	NA	NA	NA	NA	NA
GPR176	CHRDL2	NA	NA	KCTD11	NA	NA	NA	NA	NA	NA	NA	NA	NA	NA
GRAMD1B	CHRNA1	NA	NA	KCTD16	NA	NA	NA	NA	NA	NA	NA	NA	NA	NA
GRIK2	CHST11	NA	NA	KCTD4	NA	NA	NA	NA	NA	NA	NA	NA	NA	NA
GRINA	CHST2	NA	NA	KDELR3	NA	NA	NA	NA	NA	NA	NA	NA	NA	NA
GSN	CITED2	NA	NA	KIAA1324	NA	NA	NA	NA	NA	NA	NA	NA	NA	NA
GSTM3	CLCN5	NA	NA	KIRREL3	NA	NA	NA	NA	NA	NA	NA	NA	NA	NA
GSTO1	CLCNKA	NA	NA	KIT	NA	NA	NA	NA	NA	NA	NA	NA	NA	NA
GYG1	CLDN1	NA	NA	KLHL36	NA	NA	NA	NA	NA	NA	NA	NA	NA	NA
GYS1	CLDN16	NA	NA	KRTAP4-2	NA	NA	NA	NA	NA	NA	NA	NA	NA	NA
H6PD	CLEC4G	NA	NA	KRTAP4-4	NA	NA	NA	NA	NA	NA	NA	NA	NA	NA
HCFC2	CLIC3	NA	NA	L1CAM	NA	NA	NA	NA	NA	NA	NA	NA	NA	NA
HCN2	CLIC4	NA	NA	LAMA1	NA	NA	NA	NA	NA	NA	NA	NA	NA	NA
HDAC9	CLN5	NA	NA	LAMB2	NA	NA	NA	NA	NA	NA	NA	NA	NA	NA
HEATR5A	CLN8	NA	NA	LAMC1	NA	NA	NA	NA	NA	NA	NA	NA	NA	NA
HECW1	CLPTM1L	NA	NA	LAMC2	NA	NA	NA	NA	NA	NA	NA	NA	NA	NA
HECW2	CLSTN2	NA	NA	LAMP2	NA	NA	NA	NA	NA	NA	NA	NA	NA	NA
HEXB	CLTB	NA	NA	LCE2A	NA	NA	NA	NA	NA	NA	NA	NA	NA	NA
HHAT	CLTCL1	NA	NA	LCE2B	NA	NA	NA	NA	NA	NA	NA	NA	NA	NA
HINT3	CMBL	NA	NA	LCE2C	NA	NA	NA	NA	NA	NA	NA	NA	NA	NA
HIST1H2BK	CMIP	NA	NA	LGR4	NA	NA	NA	NA	NA	NA	NA	NA	NA	NA
HIVEP1	CMKLR1	NA	NA	LIMK2	NA	NA	NA	NA	NA	NA	NA	NA	NA	NA
HIVEP2	CMPK1	NA	NA	LIPH	NA	NA	NA	NA	NA	NA	NA	NA	NA	NA
HK2	CMTM4	NA	NA	LMO7	NA	NA	NA	NA	NA	NA	NA	NA	NA	NA
HLA-F	CNIH3	NA	NA	LNPEP	NA	NA	NA	NA	NA	NA	NA	NA	NA	NA
HM13	CNNM1	NA	NA	LOC389834	NA	NA	NA	NA	NA	NA	NA	NA	NA	NA
HSD17B14	CNTN1	NA	NA	LOX	NA	NA	NA	NA	NA	NA	NA	NA	NA	NA
HSPA4L	COBLL1	NA	NA	LOXL4	NA	NA	NA	NA	NA	NA	NA	NA	NA	NA
ICAM4	COG6	NA	NA	LPCAT2	NA	NA	NA	NA	NA	NA	NA	NA	NA	NA
ICAM5	COL10A1	NA	NA	LPXN	NA	NA	NA	NA	NA	NA	NA	NA	NA	NA
IDS	COL11A1	NA	NA	LRP10	NA	NA	NA	NA	NA	NA	NA	NA	NA	NA
IDUA	COL25A1	NA	NA	LRRC17	NA	NA	NA	NA	NA	NA	NA	NA	NA	NA
IFI27L2	COL2A1	NA	NA	LRRFIP1	NA	NA	NA	NA	NA	NA	NA	NA	NA	NA
IFI30	COL4A3BP	NA	NA	LRRN3	NA	NA	NA	NA	NA	NA	NA	NA	NA	NA
IFI6	COL4A5	NA	NA	LTBP1	NA	NA	NA	NA	NA	NA	NA	NA	NA	NA
IFIT3	COL4A6	NA	NA	LUZP1	NA	NA	NA	NA	NA	NA	NA	NA	NA	NA
IGDCC4	COL5A1	NA	NA	LYSMD3	NA	NA	NA	NA	NA	NA	NA	NA	NA	NA
IGF2R	COL8A1	NA	NA	MACF1	NA	NA	NA	NA	NA	NA	NA	NA	NA	NA
IGFBP7	COL8A2	NA	NA	MAFF	NA	NA	NA	NA	NA	NA	NA	NA	NA	NA
IKBIP	COMP	NA	NA	MAMDC2	NA	NA	NA	NA	NA	NA	NA	NA	NA	NA
IL1A	COPZ2	NA	NA	MAN1B1	NA	NA	NA	NA	NA	NA	NA	NA	NA	NA
IL32	COQ10B	NA	NA	MAN2A1	NA	NA	NA	NA	NA	NA	NA	NA	NA	NA
IL6	COX7A1	NA	NA	MAST4	NA	NA	NA	NA	NA	NA	NA	NA	NA	NA
INA	CPE	NA	NA	MCFD2	NA	NA	NA	NA	NA	NA	NA	NA	NA	NA
INHBB	CPEB2	NA	NA	MCTP2	NA	NA	NA	NA	NA	NA	NA	NA	NA	NA
INPP5A	CPEB4	NA	NA	MDM2	NA	NA	NA	NA	NA	NA	NA	NA	NA	NA
IRAK2	CPNE3	NA	NA	MFAP2	NA	NA	NA	NA	NA	NA	NA	NA	NA	NA
IRAK4	CPPED1	NA	NA	MFAP5	NA	NA	NA	NA	NA	NA	NA	NA	NA	NA
ITGAV	CRAT	NA	NA	MFSD1	NA	NA	NA	NA	NA	NA	NA	NA	NA	NA
ITGB5	CREB3	NA	NA	MFSD3	NA	NA	NA	NA	NA	NA	NA	NA	NA	NA
ITPR2	CREG1	NA	NA	MGAT5	NA	NA	NA	NA	NA	NA	NA	NA	NA	NA
ITPRIPL2	CRELD1	NA	NA	MGLL	NA	NA	NA	NA	NA	NA	NA	NA	NA	NA
JAZF1	CRIP2	NA	NA	MICA	NA	NA	NA	NA	NA	NA	NA	NA	NA	NA
KCNG1	CRNN	NA	NA	MINK1	NA	NA	NA	NA	NA	NA	NA	NA	NA	NA
KCNH1	CRTAC1	NA	NA	MLLT11	NA	NA	NA	NA	NA	NA	NA	NA	NA	NA
KCNK6	CRYL1	NA	NA	MOGS	NA	NA	NA	NA	NA	NA	NA	NA	NA	NA
KCNN2	CSF2	NA	NA	MPZL1	NA	NA	NA	NA	NA	NA	NA	NA	NA	NA
KCTD11	CSF2RB	NA	NA	MR1	NA	NA	NA	NA	NA	NA	NA	NA	NA	NA
KCTD16	CSGALNACT1	NA	NA	MRAS	NA	NA	NA	NA	NA	NA	NA	NA	NA	NA
KCTD4	CSGALNACT2	NA	NA	MSRB3	NA	NA	NA	NA	NA	NA	NA	NA	NA	NA
KDELR3	CSPG5	NA	NA	MTSS1	NA	NA	NA	NA	NA	NA	NA	NA	NA	NA
KIAA0355	CST1	NA	NA	MXD1	NA	NA	NA	NA	NA	NA	NA	NA	NA	NA
KIAA1324	CST2	NA	NA	MXRA5	NA	NA	NA	NA	NA	NA	NA	NA	NA	NA
KIRREL3	CST3	NA	NA	MYO6	NA	NA	NA	NA	NA	NA	NA	NA	NA	NA
KIT	CST5	NA	NA	NAALADL2	NA	NA	NA	NA	NA	NA	NA	NA	NA	NA
KLHL36	CST9L	NA	NA	NADSYN1	NA	NA	NA	NA	NA	NA	NA	NA	NA	NA
KLHL5	CTBS	NA	NA	NAPB	NA	NA	NA	NA	NA	NA	NA	NA	NA	NA
KLHL7	CTGF	NA	NA	NAV1	NA	NA	NA	NA	NA	NA	NA	NA	NA	NA
KRTAP4-2	CTSD	NA	NA	NBEAL1	NA	NA	NA	NA	NA	NA	NA	NA	NA	NA
KRTAP4-4	CTSO	NA	NA	NCF2	NA	NA	NA	NA	NA	NA	NA	NA	NA	NA
L1CAM	CTSZ	NA	NA	NCOA3	NA	NA	NA	NA	NA	NA	NA	NA	NA	NA
LAMA1	CTTN	NA	NA	NCOA7	NA	NA	NA	NA	NA	NA	NA	NA	NA	NA
LAMB2	CTTNBP2NL	NA	NA	NDEL1	NA	NA	NA	NA	NA	NA	NA	NA	NA	NA
LAMC1	CUBN	NA	NA	NDFIP2	NA	NA	NA	NA	NA	NA	NA	NA	NA	NA
LAMC2	CXADR	NA	NA	NDUFA1	NA	NA	NA	NA	NA	NA	NA	NA	NA	NA
LAMP2	CXCL10	NA	NA	NEDD4L	NA	NA	NA	NA	NA	NA	NA	NA	NA	NA
LCE2A	CXCR4	NA	NA	NEDD9	NA	NA	NA	NA	NA	NA	NA	NA	NA	NA
LCE2B	CYB5D2	NA	NA	NEGR1	NA	NA	NA	NA	NA	NA	NA	NA	NA	NA
LCE2C	CYB5R1	NA	NA	NEO1	NA	NA	NA	NA	NA	NA	NA	NA	NA	NA
LGR4	CYBA	NA	NA	NEXN	NA	NA	NA	NA	NA	NA	NA	NA	NA	NA
LHCGR	CYBRD1	NA	NA	NFAT5	NA	NA	NA	NA	NA	NA	NA	NA	NA	NA
LIMK2	CYFIP2	NA	NA	NFE2L3	NA	NA	NA	NA	NA	NA	NA	NA	NA	NA
LIPH	CYHR1	NA	NA	NFKBIZ	NA	NA	NA	NA	NA	NA	NA	NA	NA	NA
LMO7	CYP2E1	NA	NA	NIPAL2	NA	NA	NA	NA	NA	NA	NA	NA	NA	NA
LNPEP	CYP2S1	NA	NA	NIPAL3	NA	NA	NA	NA	NA	NA	NA	NA	NA	NA
LOC389834	CYP2U1	NA	NA	NLRP10	NA	NA	NA	NA	NA	NA	NA	NA	NA	NA
LOX	CYR61	NA	NA	NMNAT2	NA	NA	NA	NA	NA	NA	NA	NA	NA	NA
LOXL3	CYS1	NA	NA	NOTCH3	NA	NA	NA	NA	NA	NA	NA	NA	NA	NA
LOXL4	DAAM1	NA	NA	NOX4	NA	NA	NA	NA	NA	NA	NA	NA	NA	NA
LPCAT2	DACT1	NA	NA	NPAS2	NA	NA	NA	NA	NA	NA	NA	NA	NA	NA
LPXN	DAG1	NA	NA	NPDC1	NA	NA	NA	NA	NA	NA	NA	NA	NA	NA
LRP10	DAGLB	NA	NA	NRBP2	NA	NA	NA	NA	NA	NA	NA	NA	NA	NA
LRRC17	DAP	NA	NA	NRG1	NA	NA	NA	NA	NA	NA	NA	NA	NA	NA
LRRC2	DCAF6	NA	NA	NTF3	NA	NA	NA	NA	NA	NA	NA	NA	NA	NA
LRRFIP1	DCLK1	NA	NA	NTM	NA	NA	NA	NA	NA	NA	NA	NA	NA	NA
LRRN3	DCTN1	NA	NA	OGFRL1	NA	NA	NA	NA	NA	NA	NA	NA	NA	NA
LTBP1	DCTN6	NA	NA	OPHN1	NA	NA	NA	NA	NA	NA	NA	NA	NA	NA
LUZP1	DCUN1D3	NA	NA	OPTN	NA	NA	NA	NA	NA	NA	NA	NA	NA	NA
LY96	DDA1	NA	NA	OR5B21	NA	NA	NA	NA	NA	NA	NA	NA	NA	NA
LYSMD3	DDAH1	NA	NA	OSBPL3	NA	NA	NA	NA	NA	NA	NA	NA	NA	NA
MACF1	DDR1	NA	NA	OSR2	NA	NA	NA	NA	NA	NA	NA	NA	NA	NA
MAFF	DDR2	NA	NA	OSTC	NA	NA	NA	NA	NA	NA	NA	NA	NA	NA
MAMDC2	DDRGK1	NA	NA	OSTM1	NA	NA	NA	NA	NA	NA	NA	NA	NA	NA
MAN1B1	DDX58	NA	NA	OTUB2	NA	NA	NA	NA	NA	NA	NA	NA	NA	NA
MAN2A1	DEDD2	NA	NA	P4HA1	NA	NA	NA	NA	NA	NA	NA	NA	NA	NA
MAST4	DENND2C	NA	NA	P4HA2	NA	NA	NA	NA	NA	NA	NA	NA	NA	NA
MCFD2	DGAT2	NA	NA	PAG1	NA	NA	NA	NA	NA	NA	NA	NA	NA	NA
MCTP2	DGKA	NA	NA	PAMR1	NA	NA	NA	NA	NA	NA	NA	NA	NA	NA
MDM2	DGKI	NA	NA	PCDHB10	NA	NA	NA	NA	NA	NA	NA	NA	NA	NA
MFAP2	DHCR7	NA	NA	PCDHB11	NA	NA	NA	NA	NA	NA	NA	NA	NA	NA
MFAP3	DHDH	NA	NA	PCDHB13	NA	NA	NA	NA	NA	NA	NA	NA	NA	NA
MFAP5	DHRS1	NA	NA	PCDHB14	NA	NA	NA	NA	NA	NA	NA	NA	NA	NA
MFSD1	DHRS12	NA	NA	PCDHB15	NA	NA	NA	NA	NA	NA	NA	NA	NA	NA
MFSD3	DHRS7	NA	NA	PCDHB16	NA	NA	NA	NA	NA	NA	NA	NA	NA	NA
MGAT5	DHRS7B	NA	NA	PCDHB8	NA	NA	NA	NA	NA	NA	NA	NA	NA	NA
MGLL	DIRC2	NA	NA	PCDHB9	NA	NA	NA	NA	NA	NA	NA	NA	NA	NA
MICA	DIXDC1	NA	NA	PCYT1A	NA	NA	NA	NA	NA	NA	NA	NA	NA	NA
MICAL2	DKK2	NA	NA	PDCD1LG2	NA	NA	NA	NA	NA	NA	NA	NA	NA	NA
MINK1	DKK3	NA	NA	PDCD4	NA	NA	NA	NA	NA	NA	NA	NA	NA	NA
MLLT11	DLL1	NA	NA	PDLIM5	NA	NA	NA	NA	NA	NA	NA	NA	NA	NA
MMP17	DMD	NA	NA	PEA15	NA	NA	NA	NA	NA	NA	NA	NA	NA	NA
MMP2	DMPK	NA	NA	PGM5	NA	NA	NA	NA	NA	NA	NA	NA	NA	NA
MOGS	DMRTA1	NA	NA	PHLDA3	NA	NA	NA	NA	NA	NA	NA	NA	NA	NA
MPZL1	DNAH1	NA	NA	PIK3C3	NA	NA	NA	NA	NA	NA	NA	NA	NA	NA
MR1	DNAJB4	NA	NA	PIK3IP1	NA	NA	NA	NA	NA	NA	NA	NA	NA	NA
MRAS	DNAJB6	NA	NA	PITPNM3	NA	NA	NA	NA	NA	NA	NA	NA	NA	NA
MSRB3	DNAJB9	NA	NA	PLA2G15	NA	NA	NA	NA	NA	NA	NA	NA	NA	NA
MTSS1	DNAJC1	NA	NA	PLA2G16	NA	NA	NA	NA	NA	NA	NA	NA	NA	NA
MXD1	DNAJC6	NA	NA	PLA2G4C	NA	NA	NA	NA	NA	NA	NA	NA	NA	NA
MXRA5	DNASE1L1	NA	NA	PLAT	NA	NA	NA	NA	NA	NA	NA	NA	NA	NA
MYO6	DNER	NA	NA	PLCB4	NA	NA	NA	NA	NA	NA	NA	NA	NA	NA
NAALADL2	DOCK9	NA	NA	PLEKHA1	NA	NA	NA	NA	NA	NA	NA	NA	NA	NA
NADSYN1	DOK1	NA	NA	PLK3	NA	NA	NA	NA	NA	NA	NA	NA	NA	NA
NAPB	DOK7	NA	NA	PLOD2	NA	NA	NA	NA	NA	NA	NA	NA	NA	NA
NAV1	DPH3	NA	NA	PLXNA3	NA	NA	NA	NA	NA	NA	NA	NA	NA	NA
NBEAL1	DPP7	NA	NA	PMAIP1	NA	NA	NA	NA	NA	NA	NA	NA	NA	NA
NCF2	DRAM1	NA	NA	POLD4	NA	NA	NA	NA	NA	NA	NA	NA	NA	NA
NCOA3	DRP2	NA	NA	PORCN	NA	NA	NA	NA	NA	NA	NA	NA	NA	NA
NCOA7	DSP	NA	NA	PPFIBP1	NA	NA	NA	NA	NA	NA	NA	NA	NA	NA
NDEL1	DUSP1	NA	NA	PPFIBP2	NA	NA	NA	NA	NA	NA	NA	NA	NA	NA
NDFIP2	DUSP23	NA	NA	PPM1K	NA	NA	NA	NA	NA	NA	NA	NA	NA	NA
NDUFA1	DUSP3	NA	NA	PPP1R3C	NA	NA	NA	NA	NA	NA	NA	NA	NA	NA
NEDD4L	DUSP6	NA	NA	PPP2R5B	NA	NA	NA	NA	NA	NA	NA	NA	NA	NA
NEDD9	DYNC1I1	NA	NA	PRDM1	NA	NA	NA	NA	NA	NA	NA	NA	NA	NA
NEGR1	DYNC1LI2	NA	NA	PRDX5	NA	NA	NA	NA	NA	NA	NA	NA	NA	NA
NEK10	DYNLT3	NA	NA	PRDX6	NA	NA	NA	NA	NA	NA	NA	NA	NA	NA
NEO1	DYRK1B	NA	NA	PRNP	NA	NA	NA	NA	NA	NA	NA	NA	NA	NA
NETO1	DYSF	NA	NA	PSG1	NA	NA	NA	NA	NA	NA	NA	NA	NA	NA
NEXN	EBI3	NA	NA	PSG2	NA	NA	NA	NA	NA	NA	NA	NA	NA	NA
NFAT5	ECM1	NA	NA	PSG3	NA	NA	NA	NA	NA	NA	NA	NA	NA	NA
NFE2L3	EDA2R	NA	NA	PSTPIP2	NA	NA	NA	NA	NA	NA	NA	NA	NA	NA
NFKB1	EDEM3	NA	NA	PTGFR	NA	NA	NA	NA	NA	NA	NA	NA	NA	NA
NFKB2	EDIL3	NA	NA	PTGIR	NA	NA	NA	NA	NA	NA	NA	NA	NA	NA
NFKBIE	EDN1	NA	NA	PTPN13	NA	NA	NA	NA	NA	NA	NA	NA	NA	NA
NFKBIZ	EEF1A2	NA	NA	PURA	NA	NA	NA	NA	NA	NA	NA	NA	NA	NA
NIPAL2	EFEMP2	NA	NA	QPCT	NA	NA	NA	NA	NA	NA	NA	NA	NA	NA
NIPAL3	EFHD1	NA	NA	QPRT	NA	NA	NA	NA	NA	NA	NA	NA	NA	NA
NKX2-6	EFNA3	NA	NA	RAB11FIP5	NA	NA	NA	NA	NA	NA	NA	NA	NA	NA
NLGN1	EFNA5	NA	NA	RAB5A	NA	NA	NA	NA	NA	NA	NA	NA	NA	NA
NLRP10	EGF	NA	NA	RAI14	NA	NA	NA	NA	NA	NA	NA	NA	NA	NA
NMNAT2	EGLN1	NA	NA	RAPH1	NA	NA	NA	NA	NA	NA	NA	NA	NA	NA
NOTCH3	EGLN3	NA	NA	RASA2	NA	NA	NA	NA	NA	NA	NA	NA	NA	NA
NOX4	EGR2	NA	NA	RASGRP1	NA	NA	NA	NA	NA	NA	NA	NA	NA	NA
NPAS2	EHF	NA	NA	RBM24	NA	NA	NA	NA	NA	NA	NA	NA	NA	NA
NPDC1	EIF4EBP2	NA	NA	RDH10	NA	NA	NA	NA	NA	NA	NA	NA	NA	NA
NRBP2	EIF5A2	NA	NA	RECK	NA	NA	NA	NA	NA	NA	NA	NA	NA	NA
NRG1	ELFN1	NA	NA	REEP2	NA	NA	NA	NA	NA	NA	NA	NA	NA	NA
NTF3	ELMOD1	NA	NA	REN	NA	NA	NA	NA	NA	NA	NA	NA	NA	NA
NTM	EME2	NA	NA	RFTN1	NA	NA	NA	NA	NA	NA	NA	NA	NA	NA
OGFRL1	ENC1	NA	NA	RGS5	NA	NA	NA	NA	NA	NA	NA	NA	NA	NA
OPHN1	ENPP4	NA	NA	RGS9	NA	NA	NA	NA	NA	NA	NA	NA	NA	NA
OPTN	EPB41L1	NA	NA	RHBDF2	NA	NA	NA	NA	NA	NA	NA	NA	NA	NA
OR2L2	EPB42	NA	NA	RHOC	NA	NA	NA	NA	NA	NA	NA	NA	NA	NA
OR5B21	EPHA2	NA	NA	RHOQ	NA	NA	NA	NA	NA	NA	NA	NA	NA	NA
OSBPL3	EPHA8	NA	NA	RIN2	NA	NA	NA	NA	NA	NA	NA	NA	NA	NA
OSR2	EPHX4	NA	NA	RIOK3	NA	NA	NA	NA	NA	NA	NA	NA	NA	NA
OSTC	EPS8L2	NA	NA	RIT1	NA	NA	NA	NA	NA	NA	NA	NA	NA	NA
OSTM1	ERLEC1	NA	NA	RNF144B	NA	NA	NA	NA	NA	NA	NA	NA	NA	NA
OTUB2	ERMAP	NA	NA	RNF150	NA	NA	NA	NA	NA	NA	NA	NA	NA	NA
P4HA1	ERP44	NA	NA	RPS27L	NA	NA	NA	NA	NA	NA	NA	NA	NA	NA
P4HA2	ERRFI1	NA	NA	RRM2B	NA	NA	NA	NA	NA	NA	NA	NA	NA	NA
PAG1	ETHE1	NA	NA	RSPH3	NA	NA	NA	NA	NA	NA	NA	NA	NA	NA
PAMR1	ETNK2	NA	NA	SAMD12	NA	NA	NA	NA	NA	NA	NA	NA	NA	NA
PARP8	ETV5	NA	NA	SAMD4A	NA	NA	NA	NA	NA	NA	NA	NA	NA	NA
PCBP4	EVC	NA	NA	SAMD9L	NA	NA	NA	NA	NA	NA	NA	NA	NA	NA
PCDHB10	EVI5	NA	NA	SAT1	NA	NA	NA	NA	NA	NA	NA	NA	NA	NA
PCDHB11	EVI5L	NA	NA	SCD5	NA	NA	NA	NA	NA	NA	NA	NA	NA	NA
PCDHB13	EXD2	NA	NA	SCN8A	NA	NA	NA	NA	NA	NA	NA	NA	NA	NA
PCDHB14	EXPH5	NA	NA	SCUBE3	NA	NA	NA	NA	NA	NA	NA	NA	NA	NA
PCDHB15	EXTL1	NA	NA	SEC14L1	NA	NA	NA	NA	NA	NA	NA	NA	NA	NA
PCDHB16	F2RL1	NA	NA	SEMA3C	NA	NA	NA	NA	NA	NA	NA	NA	NA	NA
PCDHB7	F2RL2	NA	NA	SEMA5A	NA	NA	NA	NA	NA	NA	NA	NA	NA	NA
PCDHB8	F3	NA	NA	SEMA6A	NA	NA	NA	NA	NA	NA	NA	NA	NA	NA
PCDHB9	F8	NA	NA	SEMA6D	NA	NA	NA	NA	NA	NA	NA	NA	NA	NA
PCYT1A	FABP3	NA	NA	SERINC2	NA	NA	NA	NA	NA	NA	NA	NA	NA	NA
PDCD1LG2	FADS3	NA	NA	SERINC3	NA	NA	NA	NA	NA	NA	NA	NA	NA	NA
PDCD4	FAM107A	NA	NA	SERPINA9	NA	NA	NA	NA	NA	NA	NA	NA	NA	NA
PDHB	FAM129B	NA	NA	SERPINB8	NA	NA	NA	NA	NA	NA	NA	NA	NA	NA
PDLIM4	FAM129C	NA	NA	SERPINE1	NA	NA	NA	NA	NA	NA	NA	NA	NA	NA
PDLIM5	FAM13B	NA	NA	SERPINE2	NA	NA	NA	NA	NA	NA	NA	NA	NA	NA
PEA15	FAM151B	NA	NA	SERTAD4	NA	NA	NA	NA	NA	NA	NA	NA	NA	NA
PGM3	FAM162A	NA	NA	SESN1	NA	NA	NA	NA	NA	NA	NA	NA	NA	NA
PGM5	FAM167A	NA	NA	SETD7	NA	NA	NA	NA	NA	NA	NA	NA	NA	NA
PHLDA2	FAM174A	NA	NA	SFXN3	NA	NA	NA	NA	NA	NA	NA	NA	NA	NA
PHLDA3	FAM187B	NA	NA	SGIP1	NA	NA	NA	NA	NA	NA	NA	NA	NA	NA
PIK3C3	FAM198B	NA	NA	SGK1	NA	NA	NA	NA	NA	NA	NA	NA	NA	NA
PIK3IP1	FAM3C	NA	NA	SGMS2	NA	NA	NA	NA	NA	NA	NA	NA	NA	NA
PITPNM3	FAM43A	NA	NA	SGTB	NA	NA	NA	NA	NA	NA	NA	NA	NA	NA
PKD2	FAM50B	NA	NA	SH3BGRL2	NA	NA	NA	NA	NA	NA	NA	NA	NA	NA
PLA2G15	FAM71F1	NA	NA	SH3GLB1	NA	NA	NA	NA	NA	NA	NA	NA	NA	NA
PLA2G16	FAM71F2	NA	NA	SH3PXD2A	NA	NA	NA	NA	NA	NA	NA	NA	NA	NA
PLA2G4C	FAM8A1	NA	NA	SH3RF1	NA	NA	NA	NA	NA	NA	NA	NA	NA	NA
PLAT	FANK1	NA	NA	SH3TC2	NA	NA	NA	NA	NA	NA	NA	NA	NA	NA
PLCB4	FAP	NA	NA	SHANK1	NA	NA	NA	NA	NA	NA	NA	NA	NA	NA
PLEKHA1	FAR2	NA	NA	SHC3	NA	NA	NA	NA	NA	NA	NA	NA	NA	NA
PLEKHF2	FAS	NA	NA	SHOX2	NA	NA	NA	NA	NA	NA	NA	NA	NA	NA
PLK3	FAT1	NA	NA	SHROOM3	NA	NA	NA	NA	NA	NA	NA	NA	NA	NA
PLOD2	FBN1	NA	NA	SIL1	NA	NA	NA	NA	NA	NA	NA	NA	NA	NA
PLXNA3	FBN2	NA	NA	SLC12A4	NA	NA	NA	NA	NA	NA	NA	NA	NA	NA
PMAIP1	FBXL16	NA	NA	SLC17A5	NA	NA	NA	NA	NA	NA	NA	NA	NA	NA
POLD4	FBXL2	NA	NA	SLC1A1	NA	NA	NA	NA	NA	NA	NA	NA	NA	NA
PORCN	FBXO2	NA	NA	SLC20A2	NA	NA	NA	NA	NA	NA	NA	NA	NA	NA
PPFIBP1	FBXO9	NA	NA	SLC22A18	NA	NA	NA	NA	NA	NA	NA	NA	NA	NA
PPFIBP2	FBXW4	NA	NA	SLC22A4	NA	NA	NA	NA	NA	NA	NA	NA	NA	NA
PPM1K	FCGRT	NA	NA	SLC22A5	NA	NA	NA	NA	NA	NA	NA	NA	NA	NA
PPP1R3C	FCHSD1	NA	NA	SLC25A20	NA	NA	NA	NA	NA	NA	NA	NA	NA	NA
PPP2R5B	FCHSD2	NA	NA	SLC2A13	NA	NA	NA	NA	NA	NA	NA	NA	NA	NA
PRDM1	FER1L4	NA	NA	SLC2A14	NA	NA	NA	NA	NA	NA	NA	NA	NA	NA
PRDX5	FGD4	NA	NA	SLC30A4	NA	NA	NA	NA	NA	NA	NA	NA	NA	NA
PRDX6	FGF11	NA	NA	SLC31A2	NA	NA	NA	NA	NA	NA	NA	NA	NA	NA
PREPL	FGF2	NA	NA	SLC33A1	NA	NA	NA	NA	NA	NA	NA	NA	NA	NA
PRNP	FHDC1	NA	NA	SLC35B3	NA	NA	NA	NA	NA	NA	NA	NA	NA	NA
PSG1	FHL2	NA	NA	SLC35F5	NA	NA	NA	NA	NA	NA	NA	NA	NA	NA
PSG2	FHOD3	NA	NA	SLC36A1	NA	NA	NA	NA	NA	NA	NA	NA	NA	NA
PSG3	FIBCD1	NA	NA	SLC39A13	NA	NA	NA	NA	NA	NA	NA	NA	NA	NA
PSTPIP2	FIBIN	NA	NA	SLC39A6	NA	NA	NA	NA	NA	NA	NA	NA	NA	NA
PTGFR	FILIP1L	NA	NA	SLC41A2	NA	NA	NA	NA	NA	NA	NA	NA	NA	NA
PTGIR	FKBP1A	NA	NA	SLC46A3	NA	NA	NA	NA	NA	NA	NA	NA	NA	NA
PTPN13	FKBP1B	NA	NA	SLC7A5	NA	NA	NA	NA	NA	NA	NA	NA	NA	NA
PTX3	FKBP8	NA	NA	SLC9A3R2	NA	NA	NA	NA	NA	NA	NA	NA	NA	NA
PURA	FKBP9	NA	NA	SLC9A7	NA	NA	NA	NA	NA	NA	NA	NA	NA	NA
QPCT	FLNB	NA	NA	SMURF2	NA	NA	NA	NA	NA	NA	NA	NA	NA	NA
QPRT	FLT1	NA	NA	SP100	NA	NA	NA	NA	NA	NA	NA	NA	NA	NA
RAB11FIP5	FLYWCH1	NA	NA	SPARC	NA	NA	NA	NA	NA	NA	NA	NA	NA	NA
RAB5A	FMN1	NA	NA	SPATA18	NA	NA	NA	NA	NA	NA	NA	NA	NA	NA
RAI14	FMOD	NA	NA	SPOCK1	NA	NA	NA	NA	NA	NA	NA	NA	NA	NA
RANBP17	FN3K	NA	NA	SPTAN1	NA	NA	NA	NA	NA	NA	NA	NA	NA	NA
RAPH1	FNDC1	NA	NA	SRGN	NA	NA	NA	NA	NA	NA	NA	NA	NA	NA
RASA2	FNDC3B	NA	NA	SRPX2	NA	NA	NA	NA	NA	NA	NA	NA	NA	NA
RASGRP1	FNDC4	NA	NA	STARD4	NA	NA	NA	NA	NA	NA	NA	NA	NA	NA
RASGRP3	FOXA1	NA	NA	STIM1	NA	NA	NA	NA	NA	NA	NA	NA	NA	NA
RBM24	FOXE1	NA	NA	STK10	NA	NA	NA	NA	NA	NA	NA	NA	NA	NA
RDH10	FOXJ1	NA	NA	STX12	NA	NA	NA	NA	NA	NA	NA	NA	NA	NA
RECK	FPR3	NA	NA	STX3	NA	NA	NA	NA	NA	NA	NA	NA	NA	NA
REEP2	FRMD3	NA	NA	STX4	NA	NA	NA	NA	NA	NA	NA	NA	NA	NA
RELB	FRMD6	NA	NA	STXBP6	NA	NA	NA	NA	NA	NA	NA	NA	NA	NA
REN	FRY	NA	NA	SVIL	NA	NA	NA	NA	NA	NA	NA	NA	NA	NA
RFTN1	FSCN2	NA	NA	SYNGR2	NA	NA	NA	NA	NA	NA	NA	NA	NA	NA
RFTN2	FSTL3	NA	NA	TAF13	NA	NA	NA	NA	NA	NA	NA	NA	NA	NA
RGS5	FUCA1	NA	NA	TBC1D2	NA	NA	NA	NA	NA	NA	NA	NA	NA	NA
RGS9	FZD6	NA	NA	TBC1D4	NA	NA	NA	NA	NA	NA	NA	NA	NA	NA
RHBDF2	GAA	NA	NA	TBC1D8B	NA	NA	NA	NA	NA	NA	NA	NA	NA	NA
RHOC	GABARAPL1	NA	NA	TCP11L1	NA	NA	NA	NA	NA	NA	NA	NA	NA	NA
RHOQ	GABBR2	NA	NA	TCTA	NA	NA	NA	NA	NA	NA	NA	NA	NA	NA
RIN2	GABRD	NA	NA	TEX2	NA	NA	NA	NA	NA	NA	NA	NA	NA	NA
RIOK3	GADD45A	NA	NA	TFAP2A	NA	NA	NA	NA	NA	NA	NA	NA	NA	NA
RIT1	GADD45B	NA	NA	TFEB	NA	NA	NA	NA	NA	NA	NA	NA	NA	NA
RNF144B	GALC	NA	NA	TG	NA	NA	NA	NA	NA	NA	NA	NA	NA	NA
RNF150	GALNT10	NA	NA	TGFBR2	NA	NA	NA	NA	NA	NA	NA	NA	NA	NA
RPS27L	GALNT11	NA	NA	TGM2	NA	NA	NA	NA	NA	NA	NA	NA	NA	NA
RPS6KC1	GALNT5	NA	NA	THY1	NA	NA	NA	NA	NA	NA	NA	NA	NA	NA
RRM2B	GALR2	NA	NA	TIAM1	NA	NA	NA	NA	NA	NA	NA	NA	NA	NA
RSPH3	GAMT	NA	NA	TIMP3	NA	NA	NA	NA	NA	NA	NA	NA	NA	NA
SAMD12	GAS2L2	NA	NA	TM6SF2	NA	NA	NA	NA	NA	NA	NA	NA	NA	NA
SAMD4A	GAS6	NA	NA	TMEM106A	NA	NA	NA	NA	NA	NA	NA	NA	NA	NA
SAMD9L	GATA3	NA	NA	TMEM117	NA	NA	NA	NA	NA	NA	NA	NA	NA	NA
SAT1	GATA6	NA	NA	TMEM131	NA	NA	NA	NA	NA	NA	NA	NA	NA	NA
SATB2	GBA	NA	NA	TMEM136	NA	NA	NA	NA	NA	NA	NA	NA	NA	NA
SCD5	GBE1	NA	NA	TMEM150A	NA	NA	NA	NA	NA	NA	NA	NA	NA	NA
SCN8A	GCC2	NA	NA	TMEM154	NA	NA	NA	NA	NA	NA	NA	NA	NA	NA
SCUBE3	GCKR	NA	NA	TMEM156	NA	NA	NA	NA	NA	NA	NA	NA	NA	NA
SEC14L1	GCNT2	NA	NA	TMEM200A	NA	NA	NA	NA	NA	NA	NA	NA	NA	NA
SEMA3C	GCNT4	NA	NA	TMEM217	NA	NA	NA	NA	NA	NA	NA	NA	NA	NA
SEMA5A	GDE1	NA	NA	TMEM9B	NA	NA	NA	NA	NA	NA	NA	NA	NA	NA
SEMA6A	GDF11	NA	NA	TNFAIP1	NA	NA	NA	NA	NA	NA	NA	NA	NA	NA
SEMA6D	GDF15	NA	NA	TNFRSF10B	NA	NA	NA	NA	NA	NA	NA	NA	NA	NA
SERINC2	GDF6	NA	NA	TNFRSF10D	NA	NA	NA	NA	NA	NA	NA	NA	NA	NA
SERINC3	GDI1	NA	NA	TNFSF18	NA	NA	NA	NA	NA	NA	NA	NA	NA	NA
SERPINA9	GDNF	NA	NA	TNFSF4	NA	NA	NA	NA	NA	NA	NA	NA	NA	NA
SERPINB8	GDPD1	NA	NA	TNIP1	NA	NA	NA	NA	NA	NA	NA	NA	NA	NA
SERPINE1	GDPD5	NA	NA	TOB1	NA	NA	NA	NA	NA	NA	NA	NA	NA	NA
SERPINE2	GFOD1	NA	NA	TP53INP1	NA	NA	NA	NA	NA	NA	NA	NA	NA	NA
SERTAD4	GFPT1	NA	NA	TPBG	NA	NA	NA	NA	NA	NA	NA	NA	NA	NA
SESN1	GHR	NA	NA	TPM1	NA	NA	NA	NA	NA	NA	NA	NA	NA	NA
SESN2	GIPC1	NA	NA	TPRG1L	NA	NA	NA	NA	NA	NA	NA	NA	NA	NA
SETD7	GJA5	NA	NA	TRAK1	NA	NA	NA	NA	NA	NA	NA	NA	NA	NA
SFXN3	GJB2	NA	NA	TRAK2	NA	NA	NA	NA	NA	NA	NA	NA	NA	NA
SGCZ	GK5	NA	NA	TRIM22	NA	NA	NA	NA	NA	NA	NA	NA	NA	NA
SGIP1	GLB1	NA	NA	TRIML2	NA	NA	NA	NA	NA	NA	NA	NA	NA	NA
SGK1	GLIPR1	NA	NA	TRPC1	NA	NA	NA	NA	NA	NA	NA	NA	NA	NA
SGMS2	GLRX	NA	NA	TRPC4	NA	NA	NA	NA	NA	NA	NA	NA	NA	NA
SGTB	GLS	NA	NA	TRPM4	NA	NA	NA	NA	NA	NA	NA	NA	NA	NA
SH3BGRL2	GLTP	NA	NA	TRPV2	NA	NA	NA	NA	NA	NA	NA	NA	NA	NA
SH3GLB1	GMIP	NA	NA	TSPAN13	NA	NA	NA	NA	NA	NA	NA	NA	NA	NA
SH3PXD2A	GNAI2	NA	NA	TSPAN14	NA	NA	NA	NA	NA	NA	NA	NA	NA	NA
SH3RF1	GNPTAB	NA	NA	TSPAN9	NA	NA	NA	NA	NA	NA	NA	NA	NA	NA
SH3TC2	GNPTG	NA	NA	TTC3	NA	NA	NA	NA	NA	NA	NA	NA	NA	NA
SHANK1	GOLGB1	NA	NA	TUBB2A	NA	NA	NA	NA	NA	NA	NA	NA	NA	NA
SHC3	GPLD1	NA	NA	UBL3	NA	NA	NA	NA	NA	NA	NA	NA	NA	NA
SHOX2	GPR1	NA	NA	UCHL1	NA	NA	NA	NA	NA	NA	NA	NA	NA	NA
SHROOM3	GPR107	NA	NA	UFM1	NA	NA	NA	NA	NA	NA	NA	NA	NA	NA
SIL1	GPR108	NA	NA	ULBP1	NA	NA	NA	NA	NA	NA	NA	NA	NA	NA
SIPA1L3	GPR132	NA	NA	UNC13B	NA	NA	NA	NA	NA	NA	NA	NA	NA	NA
SLC12A4	GPR137	NA	NA	USP53	NA	NA	NA	NA	NA	NA	NA	NA	NA	NA
SLC16A12	GPR137B	NA	NA	VAMP2	NA	NA	NA	NA	NA	NA	NA	NA	NA	NA
SLC16A4	GPR146	NA	NA	VAT1	NA	NA	NA	NA	NA	NA	NA	NA	NA	NA
SLC17A5	GPR151	NA	NA	VGLL3	NA	NA	NA	NA	NA	NA	NA	NA	NA	NA
SLC1A1	GPR155	NA	NA	WDR26	NA	NA	NA	NA	NA	NA	NA	NA	NA	NA
SLC20A2	GPR157	NA	NA	WDR41	NA	NA	NA	NA	NA	NA	NA	NA	NA	NA
SLC22A18	GPR35	NA	NA	WDR63	NA	NA	NA	NA	NA	NA	NA	NA	NA	NA
SLC22A4	GPR52	NA	NA	WDR66	NA	NA	NA	NA	NA	NA	NA	NA	NA	NA
SLC22A5	GPR6	NA	NA	WIPI1	NA	NA	NA	NA	NA	NA	NA	NA	NA	NA
SLC25A20	GPX3	NA	NA	WNT16	NA	NA	NA	NA	NA	NA	NA	NA	NA	NA
SLC2A13	GRAMD1B	NA	NA	WNT5A	NA	NA	NA	NA	NA	NA	NA	NA	NA	NA
SLC2A14	GRB2	NA	NA	WNT5B	NA	NA	NA	NA	NA	NA	NA	NA	NA	NA
SLC30A4	GREB1L	NA	NA	XDH	NA	NA	NA	NA	NA	NA	NA	NA	NA	NA
SLC31A2	GRK4	NA	NA	YPEL2	NA	NA	NA	NA	NA	NA	NA	NA	NA	NA
SLC33A1	GRN	NA	NA	ZBTB46	NA	NA	NA	NA	NA	NA	NA	NA	NA	NA
SLC35B3	GSN	NA	NA	ZDHHC24	NA	NA	NA	NA	NA	NA	NA	NA	NA	NA
SLC35F5	GSTM3	NA	NA	ZFHX2	NA	NA	NA	NA	NA	NA	NA	NA	NA	NA
SLC36A1	GSTO1	NA	NA	ZMAT3	NA	NA	NA	NA	NA	NA	NA	NA	NA	NA
SLC39A13	GUK1	NA	NA	ZNF264	NA	NA	NA	NA	NA	NA	NA	NA	NA	NA
SLC39A6	GYS1	NA	NA	ZNF432	NA	NA	NA	NA	NA	NA	NA	NA	NA	NA
SLC41A2	H6PD	NA	NA	ZNF583	NA	NA	NA	NA	NA	NA	NA	NA	NA	NA
SLC46A3	HAGH	NA	NA	ZNF622	NA	NA	NA	NA	NA	NA	NA	NA	NA	NA
SLC7A5	HAGHL	NA	NA	ZNF654	NA	NA	NA	NA	NA	NA	NA	NA	NA	NA
SLC9A1	HAPLN1	NA	NA	ZNFX1	NA	NA	NA	NA	NA	NA	NA	NA	NA	NA
SLC9A3R2	HAS1	NA	NA	NA	NA	NA	NA	NA	NA	NA	NA	NA	NA	NA
SLC9A7	HBEGF	NA	NA	NA	NA	NA	NA	NA	NA	NA	NA	NA	NA	NA
SLFN12	HCCS	NA	NA	NA	NA	NA	NA	NA	NA	NA	NA	NA	NA	NA
SMURF2	HCN2	NA	NA	NA	NA	NA	NA	NA	NA	NA	NA	NA	NA	NA
SP100	HCN3	NA	NA	NA	NA	NA	NA	NA	NA	NA	NA	NA	NA	NA
SPARC	HCST	NA	NA	NA	NA	NA	NA	NA	NA	NA	NA	NA	NA	NA
SPATA18	HDAC11	NA	NA	NA	NA	NA	NA	NA	NA	NA	NA	NA	NA	NA
SPOCK1	HDAC9	NA	NA	NA	NA	NA	NA	NA	NA	NA	NA	NA	NA	NA
SPRED1	HEATR5A	NA	NA	NA	NA	NA	NA	NA	NA	NA	NA	NA	NA	NA
SPTAN1	HEATR5B	NA	NA	NA	NA	NA	NA	NA	NA	NA	NA	NA	NA	NA
SQLE	HECW1	NA	NA	NA	NA	NA	NA	NA	NA	NA	NA	NA	NA	NA
SRGN	HECW2	NA	NA	NA	NA	NA	NA	NA	NA	NA	NA	NA	NA	NA
SRPX2	HERPUD1	NA	NA	NA	NA	NA	NA	NA	NA	NA	NA	NA	NA	NA
SSTR1	HES3	NA	NA	NA	NA	NA	NA	NA	NA	NA	NA	NA	NA	NA
STARD4	HES4	NA	NA	NA	NA	NA	NA	NA	NA	NA	NA	NA	NA	NA
STIM1	HEXB	NA	NA	NA	NA	NA	NA	NA	NA	NA	NA	NA	NA	NA
STK10	HGSNAT	NA	NA	NA	NA	NA	NA	NA	NA	NA	NA	NA	NA	NA
STX12	HHAT	NA	NA	NA	NA	NA	NA	NA	NA	NA	NA	NA	NA	NA
STX3	HHIP	NA	NA	NA	NA	NA	NA	NA	NA	NA	NA	NA	NA	NA
STX4	HIF1A	NA	NA	NA	NA	NA	NA	NA	NA	NA	NA	NA	NA	NA
STX6	HINT3	NA	NA	NA	NA	NA	NA	NA	NA	NA	NA	NA	NA	NA
STXBP6	HIPK3	NA	NA	NA	NA	NA	NA	NA	NA	NA	NA	NA	NA	NA
SVIL	HIST1H1T	NA	NA	NA	NA	NA	NA	NA	NA	NA	NA	NA	NA	NA
SYNGR2	HIST1H2BK	NA	NA	NA	NA	NA	NA	NA	NA	NA	NA	NA	NA	NA
SYT1	HIST2H2BE	NA	NA	NA	NA	NA	NA	NA	NA	NA	NA	NA	NA	NA
TAC3	HIVEP1	NA	NA	NA	NA	NA	NA	NA	NA	NA	NA	NA	NA	NA
TAF13	HIVEP2	NA	NA	NA	NA	NA	NA	NA	NA	NA	NA	NA	NA	NA
TBC1D2	HK2	NA	NA	NA	NA	NA	NA	NA	NA	NA	NA	NA	NA	NA
TBC1D4	HLA-DPA1	NA	NA	NA	NA	NA	NA	NA	NA	NA	NA	NA	NA	NA
TBC1D8B	HLA-DPB1	NA	NA	NA	NA	NA	NA	NA	NA	NA	NA	NA	NA	NA
TCP11L1	HLA-F	NA	NA	NA	NA	NA	NA	NA	NA	NA	NA	NA	NA	NA
TCTA	HM13	NA	NA	NA	NA	NA	NA	NA	NA	NA	NA	NA	NA	NA
TDG	HNF4A	NA	NA	NA	NA	NA	NA	NA	NA	NA	NA	NA	NA	NA
TEX2	HOXB5	NA	NA	NA	NA	NA	NA	NA	NA	NA	NA	NA	NA	NA
TFAP2A	HSD17B14	NA	NA	NA	NA	NA	NA	NA	NA	NA	NA	NA	NA	NA
TFEB	HSD17B2	NA	NA	NA	NA	NA	NA	NA	NA	NA	NA	NA	NA	NA
TG	HSD3B7	NA	NA	NA	NA	NA	NA	NA	NA	NA	NA	NA	NA	NA
TGFBR2	HSPB6	NA	NA	NA	NA	NA	NA	NA	NA	NA	NA	NA	NA	NA
TGM2	HSPB8	NA	NA	NA	NA	NA	NA	NA	NA	NA	NA	NA	NA	NA
THY1	HSPG2	NA	NA	NA	NA	NA	NA	NA	NA	NA	NA	NA	NA	NA
TIAM1	HTR1D	NA	NA	NA	NA	NA	NA	NA	NA	NA	NA	NA	NA	NA
TIMP3	HTR1E	NA	NA	NA	NA	NA	NA	NA	NA	NA	NA	NA	NA	NA
TLR6	ICAM1	NA	NA	NA	NA	NA	NA	NA	NA	NA	NA	NA	NA	NA
TM6SF1	ICAM4	NA	NA	NA	NA	NA	NA	NA	NA	NA	NA	NA	NA	NA
TM6SF2	ICAM5	NA	NA	NA	NA	NA	NA	NA	NA	NA	NA	NA	NA	NA
TMEM106A	IDS	NA	NA	NA	NA	NA	NA	NA	NA	NA	NA	NA	NA	NA
TMEM117	IDUA	NA	NA	NA	NA	NA	NA	NA	NA	NA	NA	NA	NA	NA
TMEM130	IER3	NA	NA	NA	NA	NA	NA	NA	NA	NA	NA	NA	NA	NA
TMEM131	IFI27L2	NA	NA	NA	NA	NA	NA	NA	NA	NA	NA	NA	NA	NA
TMEM132A	IFI30	NA	NA	NA	NA	NA	NA	NA	NA	NA	NA	NA	NA	NA
TMEM136	IFI6	NA	NA	NA	NA	NA	NA	NA	NA	NA	NA	NA	NA	NA
TMEM150A	IFNGR1	NA	NA	NA	NA	NA	NA	NA	NA	NA	NA	NA	NA	NA
TMEM154	IFNGR2	NA	NA	NA	NA	NA	NA	NA	NA	NA	NA	NA	NA	NA
TMEM156	IGDCC4	NA	NA	NA	NA	NA	NA	NA	NA	NA	NA	NA	NA	NA
TMEM167A	IGF1R	NA	NA	NA	NA	NA	NA	NA	NA	NA	NA	NA	NA	NA
TMEM200A	IGF2R	NA	NA	NA	NA	NA	NA	NA	NA	NA	NA	NA	NA	NA
TMEM217	IGFBP3	NA	NA	NA	NA	NA	NA	NA	NA	NA	NA	NA	NA	NA
TMEM9B	IGFBP7	NA	NA	NA	NA	NA	NA	NA	NA	NA	NA	NA	NA	NA
TNFAIP1	IL10RB	NA	NA	NA	NA	NA	NA	NA	NA	NA	NA	NA	NA	NA
TNFAIP3	IL13	NA	NA	NA	NA	NA	NA	NA	NA	NA	NA	NA	NA	NA
TNFRSF10B	IL1RAP	NA	NA	NA	NA	NA	NA	NA	NA	NA	NA	NA	NA	NA
TNFRSF10D	IL32	NA	NA	NA	NA	NA	NA	NA	NA	NA	NA	NA	NA	NA
TNFRSF9	IL6	NA	NA	NA	NA	NA	NA	NA	NA	NA	NA	NA	NA	NA
TNFSF18	INA	NA	NA	NA	NA	NA	NA	NA	NA	NA	NA	NA	NA	NA
TNFSF4	INF2	NA	NA	NA	NA	NA	NA	NA	NA	NA	NA	NA	NA	NA
TNIP1	INHBA	NA	NA	NA	NA	NA	NA	NA	NA	NA	NA	NA	NA	NA
TOB1	INHBB	NA	NA	NA	NA	NA	NA	NA	NA	NA	NA	NA	NA	NA
TOX2	INPP5A	NA	NA	NA	NA	NA	NA	NA	NA	NA	NA	NA	NA	NA
TP53INP1	INSC	NA	NA	NA	NA	NA	NA	NA	NA	NA	NA	NA	NA	NA
TPBG	INSIG2	NA	NA	NA	NA	NA	NA	NA	NA	NA	NA	NA	NA	NA
TPM1	INTU	NA	NA	NA	NA	NA	NA	NA	NA	NA	NA	NA	NA	NA
TPRG1L	IQSEC3	NA	NA	NA	NA	NA	NA	NA	NA	NA	NA	NA	NA	NA
TRAF1	IRS2	NA	NA	NA	NA	NA	NA	NA	NA	NA	NA	NA	NA	NA
TRAF4	ISCU	NA	NA	NA	NA	NA	NA	NA	NA	NA	NA	NA	NA	NA
TRAK1	ISG15	NA	NA	NA	NA	NA	NA	NA	NA	NA	NA	NA	NA	NA
TRAK2	ISM2	NA	NA	NA	NA	NA	NA	NA	NA	NA	NA	NA	NA	NA
TRIM22	ITFG1	NA	NA	NA	NA	NA	NA	NA	NA	NA	NA	NA	NA	NA
TRIM55	ITGA11	NA	NA	NA	NA	NA	NA	NA	NA	NA	NA	NA	NA	NA
TRIML2	ITGA3	NA	NA	NA	NA	NA	NA	NA	NA	NA	NA	NA	NA	NA
TRPC1	ITGAV	NA	NA	NA	NA	NA	NA	NA	NA	NA	NA	NA	NA	NA
TRPC4	ITGB5	NA	NA	NA	NA	NA	NA	NA	NA	NA	NA	NA	NA	NA
TRPM4	ITGB6	NA	NA	NA	NA	NA	NA	NA	NA	NA	NA	NA	NA	NA
TRPV2	ITGBL1	NA	NA	NA	NA	NA	NA	NA	NA	NA	NA	NA	NA	NA
TSPAN13	ITM2B	NA	NA	NA	NA	NA	NA	NA	NA	NA	NA	NA	NA	NA
TSPAN14	ITPR2	NA	NA	NA	NA	NA	NA	NA	NA	NA	NA	NA	NA	NA
TSPAN9	ITPRIPL2	NA	NA	NA	NA	NA	NA	NA	NA	NA	NA	NA	NA	NA
TSPYL6	IVL	NA	NA	NA	NA	NA	NA	NA	NA	NA	NA	NA	NA	NA
TTC3	JAG2	NA	NA	NA	NA	NA	NA	NA	NA	NA	NA	NA	NA	NA
TUBB2A	JKAMP	NA	NA	NA	NA	NA	NA	NA	NA	NA	NA	NA	NA	NA
TUBB2B	JPH2	NA	NA	NA	NA	NA	NA	NA	NA	NA	NA	NA	NA	NA
UBL3	JUP	NA	NA	NA	NA	NA	NA	NA	NA	NA	NA	NA	NA	NA
UCHL1	KATNAL1	NA	NA	NA	NA	NA	NA	NA	NA	NA	NA	NA	NA	NA
UFM1	KCNA10	NA	NA	NA	NA	NA	NA	NA	NA	NA	NA	NA	NA	NA
ULBP1	KCNAB2	NA	NA	NA	NA	NA	NA	NA	NA	NA	NA	NA	NA	NA
UNC13B	KCNC4	NA	NA	NA	NA	NA	NA	NA	NA	NA	NA	NA	NA	NA
USP53	KCNH1	NA	NA	NA	NA	NA	NA	NA	NA	NA	NA	NA	NA	NA
VAMP2	KCNH4	NA	NA	NA	NA	NA	NA	NA	NA	NA	NA	NA	NA	NA
VAT1	KCNH6	NA	NA	NA	NA	NA	NA	NA	NA	NA	NA	NA	NA	NA
VEPH1	KCNJ10	NA	NA	NA	NA	NA	NA	NA	NA	NA	NA	NA	NA	NA
VGLL3	KCNJ2	NA	NA	NA	NA	NA	NA	NA	NA	NA	NA	NA	NA	NA
WDR26	KCNK12	NA	NA	NA	NA	NA	NA	NA	NA	NA	NA	NA	NA	NA
WDR41	KCNK6	NA	NA	NA	NA	NA	NA	NA	NA	NA	NA	NA	NA	NA
WDR63	KCNMB4	NA	NA	NA	NA	NA	NA	NA	NA	NA	NA	NA	NA	NA
WDR66	KCNN2	NA	NA	NA	NA	NA	NA	NA	NA	NA	NA	NA	NA	NA
WIPI1	KCNQ3	NA	NA	NA	NA	NA	NA	NA	NA	NA	NA	NA	NA	NA
WNT16	KCTD11	NA	NA	NA	NA	NA	NA	NA	NA	NA	NA	NA	NA	NA
WNT5A	KCTD16	NA	NA	NA	NA	NA	NA	NA	NA	NA	NA	NA	NA	NA
WNT5B	KCTD20	NA	NA	NA	NA	NA	NA	NA	NA	NA	NA	NA	NA	NA
XDH	KCTD4	NA	NA	NA	NA	NA	NA	NA	NA	NA	NA	NA	NA	NA
YPEL2	KCTD9	NA	NA	NA	NA	NA	NA	NA	NA	NA	NA	NA	NA	NA
ZBTB46	KDELR3	NA	NA	NA	NA	NA	NA	NA	NA	NA	NA	NA	NA	NA
ZC3HAV1L	KDM4B	NA	NA	NA	NA	NA	NA	NA	NA	NA	NA	NA	NA	NA
ZDHHC24	KDM4C	NA	NA	NA	NA	NA	NA	NA	NA	NA	NA	NA	NA	NA
ZDHHC5	KIAA0319L	NA	NA	NA	NA	NA	NA	NA	NA	NA	NA	NA	NA	NA
ZFC3H1	KIAA1191	NA	NA	NA	NA	NA	NA	NA	NA	NA	NA	NA	NA	NA
ZFHX2	KIAA1324	NA	NA	NA	NA	NA	NA	NA	NA	NA	NA	NA	NA	NA
ZMAT3	KIF1C	NA	NA	NA	NA	NA	NA	NA	NA	NA	NA	NA	NA	NA
ZNF264	KIF26B	NA	NA	NA	NA	NA	NA	NA	NA	NA	NA	NA	NA	NA
ZNF432	KIF5A	NA	NA	NA	NA	NA	NA	NA	NA	NA	NA	NA	NA	NA
ZNF583	KIFC2	NA	NA	NA	NA	NA	NA	NA	NA	NA	NA	NA	NA	NA
ZNF622	KIRREL3	NA	NA	NA	NA	NA	NA	NA	NA	NA	NA	NA	NA	NA
ZNF654	KISS1	NA	NA	NA	NA	NA	NA	NA	NA	NA	NA	NA	NA	NA
ZNF699	KIT	NA	NA	NA	NA	NA	NA	NA	NA	NA	NA	NA	NA	NA
ZNF805	KL	NA	NA	NA	NA	NA	NA	NA	NA	NA	NA	NA	NA	NA
ZNF841	KLC1	NA	NA	NA	NA	NA	NA	NA	NA	NA	NA	NA	NA	NA
ZNFX1	KLF11	NA	NA	NA	NA	NA	NA	NA	NA	NA	NA	NA	NA	NA
ZSWIM4	KLF14	NA	NA	NA	NA	NA	NA	NA	NA	NA	NA	NA	NA	NA
NA	KLF7	NA	NA	NA	NA	NA	NA	NA	NA	NA	NA	NA	NA	NA
NA	KLF8	NA	NA	NA	NA	NA	NA	NA	NA	NA	NA	NA	NA	NA
NA	KLHDC1	NA	NA	NA	NA	NA	NA	NA	NA	NA	NA	NA	NA	NA
NA	KLHL24	NA	NA	NA	NA	NA	NA	NA	NA	NA	NA	NA	NA	NA
NA	KLHL3	NA	NA	NA	NA	NA	NA	NA	NA	NA	NA	NA	NA	NA
NA	KLHL30	NA	NA	NA	NA	NA	NA	NA	NA	NA	NA	NA	NA	NA
NA	KLHL35	NA	NA	NA	NA	NA	NA	NA	NA	NA	NA	NA	NA	NA
NA	KLHL36	NA	NA	NA	NA	NA	NA	NA	NA	NA	NA	NA	NA	NA
NA	KRT15	NA	NA	NA	NA	NA	NA	NA	NA	NA	NA	NA	NA	NA
NA	KRT17	NA	NA	NA	NA	NA	NA	NA	NA	NA	NA	NA	NA	NA
NA	KRT18	NA	NA	NA	NA	NA	NA	NA	NA	NA	NA	NA	NA	NA
NA	KRT8	NA	NA	NA	NA	NA	NA	NA	NA	NA	NA	NA	NA	NA
NA	KRTAP4-2	NA	NA	NA	NA	NA	NA	NA	NA	NA	NA	NA	NA	NA
NA	KRTAP4-4	NA	NA	NA	NA	NA	NA	NA	NA	NA	NA	NA	NA	NA
NA	KRTAP5-7	NA	NA	NA	NA	NA	NA	NA	NA	NA	NA	NA	NA	NA
NA	KRTAP5-8	NA	NA	NA	NA	NA	NA	NA	NA	NA	NA	NA	NA	NA
NA	L1CAM	NA	NA	NA	NA	NA	NA	NA	NA	NA	NA	NA	NA	NA
NA	LAMA1	NA	NA	NA	NA	NA	NA	NA	NA	NA	NA	NA	NA	NA
NA	LAMB1	NA	NA	NA	NA	NA	NA	NA	NA	NA	NA	NA	NA	NA
NA	LAMB2	NA	NA	NA	NA	NA	NA	NA	NA	NA	NA	NA	NA	NA
NA	LAMC1	NA	NA	NA	NA	NA	NA	NA	NA	NA	NA	NA	NA	NA
NA	LAMC2	NA	NA	NA	NA	NA	NA	NA	NA	NA	NA	NA	NA	NA
NA	LAMP2	NA	NA	NA	NA	NA	NA	NA	NA	NA	NA	NA	NA	NA
NA	LATS2	NA	NA	NA	NA	NA	NA	NA	NA	NA	NA	NA	NA	NA
NA	LCE2A	NA	NA	NA	NA	NA	NA	NA	NA	NA	NA	NA	NA	NA
NA	LCE2B	NA	NA	NA	NA	NA	NA	NA	NA	NA	NA	NA	NA	NA
NA	LCE2C	NA	NA	NA	NA	NA	NA	NA	NA	NA	NA	NA	NA	NA
NA	LCE2D	NA	NA	NA	NA	NA	NA	NA	NA	NA	NA	NA	NA	NA
NA	LCE3B	NA	NA	NA	NA	NA	NA	NA	NA	NA	NA	NA	NA	NA
NA	LCN1	NA	NA	NA	NA	NA	NA	NA	NA	NA	NA	NA	NA	NA
NA	LDOC1	NA	NA	NA	NA	NA	NA	NA	NA	NA	NA	NA	NA	NA
NA	LEP	NA	NA	NA	NA	NA	NA	NA	NA	NA	NA	NA	NA	NA
NA	LGMN	NA	NA	NA	NA	NA	NA	NA	NA	NA	NA	NA	NA	NA
NA	LGR4	NA	NA	NA	NA	NA	NA	NA	NA	NA	NA	NA	NA	NA
NA	LILRA5	NA	NA	NA	NA	NA	NA	NA	NA	NA	NA	NA	NA	NA
NA	LIMCH1	NA	NA	NA	NA	NA	NA	NA	NA	NA	NA	NA	NA	NA
NA	LIMK2	NA	NA	NA	NA	NA	NA	NA	NA	NA	NA	NA	NA	NA
NA	LIMS1	NA	NA	NA	NA	NA	NA	NA	NA	NA	NA	NA	NA	NA
NA	LIMS2	NA	NA	NA	NA	NA	NA	NA	NA	NA	NA	NA	NA	NA
NA	LIN7B	NA	NA	NA	NA	NA	NA	NA	NA	NA	NA	NA	NA	NA
NA	LINGO3	NA	NA	NA	NA	NA	NA	NA	NA	NA	NA	NA	NA	NA
NA	LIPG	NA	NA	NA	NA	NA	NA	NA	NA	NA	NA	NA	NA	NA
NA	LIPH	NA	NA	NA	NA	NA	NA	NA	NA	NA	NA	NA	NA	NA
NA	LMBRD1	NA	NA	NA	NA	NA	NA	NA	NA	NA	NA	NA	NA	NA
NA	LMBRD2	NA	NA	NA	NA	NA	NA	NA	NA	NA	NA	NA	NA	NA
NA	LMF1	NA	NA	NA	NA	NA	NA	NA	NA	NA	NA	NA	NA	NA
NA	LMLN	NA	NA	NA	NA	NA	NA	NA	NA	NA	NA	NA	NA	NA
NA	LMO7	NA	NA	NA	NA	NA	NA	NA	NA	NA	NA	NA	NA	NA
NA	LNPEP	NA	NA	NA	NA	NA	NA	NA	NA	NA	NA	NA	NA	NA
NA	LOC389834	NA	NA	NA	NA	NA	NA	NA	NA	NA	NA	NA	NA	NA
NA	LOX	NA	NA	NA	NA	NA	NA	NA	NA	NA	NA	NA	NA	NA
NA	LOXL4	NA	NA	NA	NA	NA	NA	NA	NA	NA	NA	NA	NA	NA
NA	LPCAT2	NA	NA	NA	NA	NA	NA	NA	NA	NA	NA	NA	NA	NA
NA	LPXN	NA	NA	NA	NA	NA	NA	NA	NA	NA	NA	NA	NA	NA
NA	LRP10	NA	NA	NA	NA	NA	NA	NA	NA	NA	NA	NA	NA	NA
NA	LRP12	NA	NA	NA	NA	NA	NA	NA	NA	NA	NA	NA	NA	NA
NA	LRRC1	NA	NA	NA	NA	NA	NA	NA	NA	NA	NA	NA	NA	NA
NA	LRRC17	NA	NA	NA	NA	NA	NA	NA	NA	NA	NA	NA	NA	NA
NA	LRRFIP1	NA	NA	NA	NA	NA	NA	NA	NA	NA	NA	NA	NA	NA
NA	LRRN3	NA	NA	NA	NA	NA	NA	NA	NA	NA	NA	NA	NA	NA
NA	LTBP1	NA	NA	NA	NA	NA	NA	NA	NA	NA	NA	NA	NA	NA
NA	LTBP3	NA	NA	NA	NA	NA	NA	NA	NA	NA	NA	NA	NA	NA
NA	LUZP1	NA	NA	NA	NA	NA	NA	NA	NA	NA	NA	NA	NA	NA
NA	LY6H	NA	NA	NA	NA	NA	NA	NA	NA	NA	NA	NA	NA	NA
NA	LYN	NA	NA	NA	NA	NA	NA	NA	NA	NA	NA	NA	NA	NA
NA	LYNX1	NA	NA	NA	NA	NA	NA	NA	NA	NA	NA	NA	NA	NA
NA	LYPD2	NA	NA	NA	NA	NA	NA	NA	NA	NA	NA	NA	NA	NA
NA	LYSMD3	NA	NA	NA	NA	NA	NA	NA	NA	NA	NA	NA	NA	NA
NA	MAB21L1	NA	NA	NA	NA	NA	NA	NA	NA	NA	NA	NA	NA	NA
NA	MACF1	NA	NA	NA	NA	NA	NA	NA	NA	NA	NA	NA	NA	NA
NA	MAFF	NA	NA	NA	NA	NA	NA	NA	NA	NA	NA	NA	NA	NA
NA	MAFK	NA	NA	NA	NA	NA	NA	NA	NA	NA	NA	NA	NA	NA
NA	MAGI1	NA	NA	NA	NA	NA	NA	NA	NA	NA	NA	NA	NA	NA
NA	MAMDC2	NA	NA	NA	NA	NA	NA	NA	NA	NA	NA	NA	NA	NA
NA	MAML3	NA	NA	NA	NA	NA	NA	NA	NA	NA	NA	NA	NA	NA
NA	MAN1B1	NA	NA	NA	NA	NA	NA	NA	NA	NA	NA	NA	NA	NA
NA	MAN2A1	NA	NA	NA	NA	NA	NA	NA	NA	NA	NA	NA	NA	NA
NA	MAN2B2	NA	NA	NA	NA	NA	NA	NA	NA	NA	NA	NA	NA	NA
NA	MANBA	NA	NA	NA	NA	NA	NA	NA	NA	NA	NA	NA	NA	NA
NA	MAP1LC3A	NA	NA	NA	NA	NA	NA	NA	NA	NA	NA	NA	NA	NA
NA	MAP3K10	NA	NA	NA	NA	NA	NA	NA	NA	NA	NA	NA	NA	NA
NA	MAP3K13	NA	NA	NA	NA	NA	NA	NA	NA	NA	NA	NA	NA	NA
NA	MAP4K3	NA	NA	NA	NA	NA	NA	NA	NA	NA	NA	NA	NA	NA
NA	MAP6	NA	NA	NA	NA	NA	NA	NA	NA	NA	NA	NA	NA	NA
NA	MAPK11	NA	NA	NA	NA	NA	NA	NA	NA	NA	NA	NA	NA	NA
NA	MAPK12	NA	NA	NA	NA	NA	NA	NA	NA	NA	NA	NA	NA	NA
NA	MAPK3	NA	NA	NA	NA	NA	NA	NA	NA	NA	NA	NA	NA	NA
NA	MAPK8IP3	NA	NA	NA	NA	NA	NA	NA	NA	NA	NA	NA	NA	NA
NA	MAPRE2	NA	NA	NA	NA	NA	NA	NA	NA	NA	NA	NA	NA	NA
NA	MAPRE3	NA	NA	NA	NA	NA	NA	NA	NA	NA	NA	NA	NA	NA
NA	MARK4	NA	NA	NA	NA	NA	NA	NA	NA	NA	NA	NA	NA	NA
NA	MAST4	NA	NA	NA	NA	NA	NA	NA	NA	NA	NA	NA	NA	NA
NA	MBOAT7	NA	NA	NA	NA	NA	NA	NA	NA	NA	NA	NA	NA	NA
NA	MCFD2	NA	NA	NA	NA	NA	NA	NA	NA	NA	NA	NA	NA	NA
NA	MCOLN1	NA	NA	NA	NA	NA	NA	NA	NA	NA	NA	NA	NA	NA
NA	MCTP2	NA	NA	NA	NA	NA	NA	NA	NA	NA	NA	NA	NA	NA
NA	MDM2	NA	NA	NA	NA	NA	NA	NA	NA	NA	NA	NA	NA	NA
NA	MEGF6	NA	NA	NA	NA	NA	NA	NA	NA	NA	NA	NA	NA	NA
NA	MFAP2	NA	NA	NA	NA	NA	NA	NA	NA	NA	NA	NA	NA	NA
NA	MFAP3L	NA	NA	NA	NA	NA	NA	NA	NA	NA	NA	NA	NA	NA
NA	MFAP5	NA	NA	NA	NA	NA	NA	NA	NA	NA	NA	NA	NA	NA
NA	MFGE8	NA	NA	NA	NA	NA	NA	NA	NA	NA	NA	NA	NA	NA
NA	MFSD1	NA	NA	NA	NA	NA	NA	NA	NA	NA	NA	NA	NA	NA
NA	MFSD3	NA	NA	NA	NA	NA	NA	NA	NA	NA	NA	NA	NA	NA
NA	MGAT5	NA	NA	NA	NA	NA	NA	NA	NA	NA	NA	NA	NA	NA
NA	MGLL	NA	NA	NA	NA	NA	NA	NA	NA	NA	NA	NA	NA	NA
NA	MGP	NA	NA	NA	NA	NA	NA	NA	NA	NA	NA	NA	NA	NA
NA	MGST2	NA	NA	NA	NA	NA	NA	NA	NA	NA	NA	NA	NA	NA
NA	MICA	NA	NA	NA	NA	NA	NA	NA	NA	NA	NA	NA	NA	NA
NA	MICALCL	NA	NA	NA	NA	NA	NA	NA	NA	NA	NA	NA	NA	NA
NA	MINK1	NA	NA	NA	NA	NA	NA	NA	NA	NA	NA	NA	NA	NA
NA	MLKL	NA	NA	NA	NA	NA	NA	NA	NA	NA	NA	NA	NA	NA
NA	MLLT11	NA	NA	NA	NA	NA	NA	NA	NA	NA	NA	NA	NA	NA
NA	MMP10	NA	NA	NA	NA	NA	NA	NA	NA	NA	NA	NA	NA	NA
NA	MMP12	NA	NA	NA	NA	NA	NA	NA	NA	NA	NA	NA	NA	NA
NA	MMP24	NA	NA	NA	NA	NA	NA	NA	NA	NA	NA	NA	NA	NA
NA	MMP3	NA	NA	NA	NA	NA	NA	NA	NA	NA	NA	NA	NA	NA
NA	MMP9	NA	NA	NA	NA	NA	NA	NA	NA	NA	NA	NA	NA	NA
NA	MOAP1	NA	NA	NA	NA	NA	NA	NA	NA	NA	NA	NA	NA	NA
NA	MOG	NA	NA	NA	NA	NA	NA	NA	NA	NA	NA	NA	NA	NA
NA	MOGS	NA	NA	NA	NA	NA	NA	NA	NA	NA	NA	NA	NA	NA
NA	MORC4	NA	NA	NA	NA	NA	NA	NA	NA	NA	NA	NA	NA	NA
NA	MPP2	NA	NA	NA	NA	NA	NA	NA	NA	NA	NA	NA	NA	NA
NA	MPP4	NA	NA	NA	NA	NA	NA	NA	NA	NA	NA	NA	NA	NA
NA	MPZL1	NA	NA	NA	NA	NA	NA	NA	NA	NA	NA	NA	NA	NA
NA	MPZL3	NA	NA	NA	NA	NA	NA	NA	NA	NA	NA	NA	NA	NA
NA	MR1	NA	NA	NA	NA	NA	NA	NA	NA	NA	NA	NA	NA	NA
NA	MRAS	NA	NA	NA	NA	NA	NA	NA	NA	NA	NA	NA	NA	NA
NA	MRC2	NA	NA	NA	NA	NA	NA	NA	NA	NA	NA	NA	NA	NA
NA	MRGPRX1	NA	NA	NA	NA	NA	NA	NA	NA	NA	NA	NA	NA	NA
NA	MRGPRX3	NA	NA	NA	NA	NA	NA	NA	NA	NA	NA	NA	NA	NA
NA	MRGPRX4	NA	NA	NA	NA	NA	NA	NA	NA	NA	NA	NA	NA	NA
NA	MRS2	NA	NA	NA	NA	NA	NA	NA	NA	NA	NA	NA	NA	NA
NA	MSI2	NA	NA	NA	NA	NA	NA	NA	NA	NA	NA	NA	NA	NA
NA	MSRB3	NA	NA	NA	NA	NA	NA	NA	NA	NA	NA	NA	NA	NA
NA	MT1X	NA	NA	NA	NA	NA	NA	NA	NA	NA	NA	NA	NA	NA
NA	MTNR1B	NA	NA	NA	NA	NA	NA	NA	NA	NA	NA	NA	NA	NA
NA	MTSS1	NA	NA	NA	NA	NA	NA	NA	NA	NA	NA	NA	NA	NA
NA	MUC1	NA	NA	NA	NA	NA	NA	NA	NA	NA	NA	NA	NA	NA
NA	MUC20	NA	NA	NA	NA	NA	NA	NA	NA	NA	NA	NA	NA	NA
NA	MVP	NA	NA	NA	NA	NA	NA	NA	NA	NA	NA	NA	NA	NA
NA	MXD1	NA	NA	NA	NA	NA	NA	NA	NA	NA	NA	NA	NA	NA
NA	MXI1	NA	NA	NA	NA	NA	NA	NA	NA	NA	NA	NA	NA	NA
NA	MXRA5	NA	NA	NA	NA	NA	NA	NA	NA	NA	NA	NA	NA	NA
NA	MXRA7	NA	NA	NA	NA	NA	NA	NA	NA	NA	NA	NA	NA	NA
NA	MYCT1	NA	NA	NA	NA	NA	NA	NA	NA	NA	NA	NA	NA	NA
NA	MYL12A	NA	NA	NA	NA	NA	NA	NA	NA	NA	NA	NA	NA	NA
NA	MYO1D	NA	NA	NA	NA	NA	NA	NA	NA	NA	NA	NA	NA	NA
NA	MYO1E	NA	NA	NA	NA	NA	NA	NA	NA	NA	NA	NA	NA	NA
NA	MYO6	NA	NA	NA	NA	NA	NA	NA	NA	NA	NA	NA	NA	NA
NA	MYOZ1	NA	NA	NA	NA	NA	NA	NA	NA	NA	NA	NA	NA	NA
NA	MYOZ2	NA	NA	NA	NA	NA	NA	NA	NA	NA	NA	NA	NA	NA
NA	NAAA	NA	NA	NA	NA	NA	NA	NA	NA	NA	NA	NA	NA	NA
NA	NAALADL2	NA	NA	NA	NA	NA	NA	NA	NA	NA	NA	NA	NA	NA
NA	NADSYN1	NA	NA	NA	NA	NA	NA	NA	NA	NA	NA	NA	NA	NA
NA	NALCN	NA	NA	NA	NA	NA	NA	NA	NA	NA	NA	NA	NA	NA
NA	NAP1L3	NA	NA	NA	NA	NA	NA	NA	NA	NA	NA	NA	NA	NA
NA	NAP1L5	NA	NA	NA	NA	NA	NA	NA	NA	NA	NA	NA	NA	NA
NA	NAPB	NA	NA	NA	NA	NA	NA	NA	NA	NA	NA	NA	NA	NA
NA	NAV1	NA	NA	NA	NA	NA	NA	NA	NA	NA	NA	NA	NA	NA
NA	NBEAL1	NA	NA	NA	NA	NA	NA	NA	NA	NA	NA	NA	NA	NA
NA	NCF2	NA	NA	NA	NA	NA	NA	NA	NA	NA	NA	NA	NA	NA
NA	NCKAP5L	NA	NA	NA	NA	NA	NA	NA	NA	NA	NA	NA	NA	NA
NA	NCOA3	NA	NA	NA	NA	NA	NA	NA	NA	NA	NA	NA	NA	NA
NA	NCOA7	NA	NA	NA	NA	NA	NA	NA	NA	NA	NA	NA	NA	NA
NA	NDEL1	NA	NA	NA	NA	NA	NA	NA	NA	NA	NA	NA	NA	NA
NA	NDFIP1	NA	NA	NA	NA	NA	NA	NA	NA	NA	NA	NA	NA	NA
NA	NDFIP2	NA	NA	NA	NA	NA	NA	NA	NA	NA	NA	NA	NA	NA
NA	NDST1	NA	NA	NA	NA	NA	NA	NA	NA	NA	NA	NA	NA	NA
NA	NDUFA1	NA	NA	NA	NA	NA	NA	NA	NA	NA	NA	NA	NA	NA
NA	NDUFC1	NA	NA	NA	NA	NA	NA	NA	NA	NA	NA	NA	NA	NA
NA	NEDD4L	NA	NA	NA	NA	NA	NA	NA	NA	NA	NA	NA	NA	NA
NA	NEDD9	NA	NA	NA	NA	NA	NA	NA	NA	NA	NA	NA	NA	NA
NA	NEGR1	NA	NA	NA	NA	NA	NA	NA	NA	NA	NA	NA	NA	NA
NA	NEO1	NA	NA	NA	NA	NA	NA	NA	NA	NA	NA	NA	NA	NA
NA	NEURL3	NA	NA	NA	NA	NA	NA	NA	NA	NA	NA	NA	NA	NA
NA	NEXN	NA	NA	NA	NA	NA	NA	NA	NA	NA	NA	NA	NA	NA
NA	NFAT5	NA	NA	NA	NA	NA	NA	NA	NA	NA	NA	NA	NA	NA
NA	NFE2L1	NA	NA	NA	NA	NA	NA	NA	NA	NA	NA	NA	NA	NA
NA	NFE2L3	NA	NA	NA	NA	NA	NA	NA	NA	NA	NA	NA	NA	NA
NA	NFKBIZ	NA	NA	NA	NA	NA	NA	NA	NA	NA	NA	NA	NA	NA
NA	NIPAL1	NA	NA	NA	NA	NA	NA	NA	NA	NA	NA	NA	NA	NA
NA	NIPAL2	NA	NA	NA	NA	NA	NA	NA	NA	NA	NA	NA	NA	NA
NA	NIPAL3	NA	NA	NA	NA	NA	NA	NA	NA	NA	NA	NA	NA	NA
NA	NIPSNAP3A	NA	NA	NA	NA	NA	NA	NA	NA	NA	NA	NA	NA	NA
NA	NKIRAS2	NA	NA	NA	NA	NA	NA	NA	NA	NA	NA	NA	NA	NA
NA	NKX2-5	NA	NA	NA	NA	NA	NA	NA	NA	NA	NA	NA	NA	NA
NA	NKX3-1	NA	NA	NA	NA	NA	NA	NA	NA	NA	NA	NA	NA	NA
NA	NLRP10	NA	NA	NA	NA	NA	NA	NA	NA	NA	NA	NA	NA	NA
NA	NLRP6	NA	NA	NA	NA	NA	NA	NA	NA	NA	NA	NA	NA	NA
NA	NLRX1	NA	NA	NA	NA	NA	NA	NA	NA	NA	NA	NA	NA	NA
NA	NME3	NA	NA	NA	NA	NA	NA	NA	NA	NA	NA	NA	NA	NA
NA	NMNAT2	NA	NA	NA	NA	NA	NA	NA	NA	NA	NA	NA	NA	NA
NA	NOG	NA	NA	NA	NA	NA	NA	NA	NA	NA	NA	NA	NA	NA
NA	NOS1AP	NA	NA	NA	NA	NA	NA	NA	NA	NA	NA	NA	NA	NA
NA	NOSTRIN	NA	NA	NA	NA	NA	NA	NA	NA	NA	NA	NA	NA	NA
NA	NOTCH3	NA	NA	NA	NA	NA	NA	NA	NA	NA	NA	NA	NA	NA
NA	NOX1	NA	NA	NA	NA	NA	NA	NA	NA	NA	NA	NA	NA	NA
NA	NOX4	NA	NA	NA	NA	NA	NA	NA	NA	NA	NA	NA	NA	NA
NA	NOXA1	NA	NA	NA	NA	NA	NA	NA	NA	NA	NA	NA	NA	NA
NA	NPAS1	NA	NA	NA	NA	NA	NA	NA	NA	NA	NA	NA	NA	NA
NA	NPAS2	NA	NA	NA	NA	NA	NA	NA	NA	NA	NA	NA	NA	NA
NA	NPC1L1	NA	NA	NA	NA	NA	NA	NA	NA	NA	NA	NA	NA	NA
NA	NPDC1	NA	NA	NA	NA	NA	NA	NA	NA	NA	NA	NA	NA	NA
NA	NPL	NA	NA	NA	NA	NA	NA	NA	NA	NA	NA	NA	NA	NA
NA	NPPB	NA	NA	NA	NA	NA	NA	NA	NA	NA	NA	NA	NA	NA
NA	NPPC	NA	NA	NA	NA	NA	NA	NA	NA	NA	NA	NA	NA	NA
NA	NPR2	NA	NA	NA	NA	NA	NA	NA	NA	NA	NA	NA	NA	NA
NA	NR1H2	NA	NA	NA	NA	NA	NA	NA	NA	NA	NA	NA	NA	NA
NA	NRBP2	NA	NA	NA	NA	NA	NA	NA	NA	NA	NA	NA	NA	NA
NA	NRG1	NA	NA	NA	NA	NA	NA	NA	NA	NA	NA	NA	NA	NA
NA	NSF	NA	NA	NA	NA	NA	NA	NA	NA	NA	NA	NA	NA	NA
NA	NT5C2	NA	NA	NA	NA	NA	NA	NA	NA	NA	NA	NA	NA	NA
NA	NT5DC1	NA	NA	NA	NA	NA	NA	NA	NA	NA	NA	NA	NA	NA
NA	NTF3	NA	NA	NA	NA	NA	NA	NA	NA	NA	NA	NA	NA	NA
NA	NTM	NA	NA	NA	NA	NA	NA	NA	NA	NA	NA	NA	NA	NA
NA	NTNG2	NA	NA	NA	NA	NA	NA	NA	NA	NA	NA	NA	NA	NA
NA	NUAK1	NA	NA	NA	NA	NA	NA	NA	NA	NA	NA	NA	NA	NA
NA	NUDT18	NA	NA	NA	NA	NA	NA	NA	NA	NA	NA	NA	NA	NA
NA	NUDT22	NA	NA	NA	NA	NA	NA	NA	NA	NA	NA	NA	NA	NA
NA	NUMB	NA	NA	NA	NA	NA	NA	NA	NA	NA	NA	NA	NA	NA
NA	NXF3	NA	NA	NA	NA	NA	NA	NA	NA	NA	NA	NA	NA	NA
NA	NXPH3	NA	NA	NA	NA	NA	NA	NA	NA	NA	NA	NA	NA	NA
NA	NXPH4	NA	NA	NA	NA	NA	NA	NA	NA	NA	NA	NA	NA	NA
NA	OGFRL1	NA	NA	NA	NA	NA	NA	NA	NA	NA	NA	NA	NA	NA
NA	OPCML	NA	NA	NA	NA	NA	NA	NA	NA	NA	NA	NA	NA	NA
NA	OPHN1	NA	NA	NA	NA	NA	NA	NA	NA	NA	NA	NA	NA	NA
NA	OPRD1	NA	NA	NA	NA	NA	NA	NA	NA	NA	NA	NA	NA	NA
NA	OPRL1	NA	NA	NA	NA	NA	NA	NA	NA	NA	NA	NA	NA	NA
NA	OPTN	NA	NA	NA	NA	NA	NA	NA	NA	NA	NA	NA	NA	NA
NA	OR10A3	NA	NA	NA	NA	NA	NA	NA	NA	NA	NA	NA	NA	NA
NA	OR10Q1	NA	NA	NA	NA	NA	NA	NA	NA	NA	NA	NA	NA	NA
NA	OR1D2	NA	NA	NA	NA	NA	NA	NA	NA	NA	NA	NA	NA	NA
NA	OR1F1	NA	NA	NA	NA	NA	NA	NA	NA	NA	NA	NA	NA	NA
NA	OR1J4	NA	NA	NA	NA	NA	NA	NA	NA	NA	NA	NA	NA	NA
NA	OR1L8	NA	NA	NA	NA	NA	NA	NA	NA	NA	NA	NA	NA	NA
NA	OR1N2	NA	NA	NA	NA	NA	NA	NA	NA	NA	NA	NA	NA	NA
NA	OR1Q1	NA	NA	NA	NA	NA	NA	NA	NA	NA	NA	NA	NA	NA
NA	OR51E1	NA	NA	NA	NA	NA	NA	NA	NA	NA	NA	NA	NA	NA
NA	OR51M1	NA	NA	NA	NA	NA	NA	NA	NA	NA	NA	NA	NA	NA
NA	OR56A5	NA	NA	NA	NA	NA	NA	NA	NA	NA	NA	NA	NA	NA
NA	OR5B21	NA	NA	NA	NA	NA	NA	NA	NA	NA	NA	NA	NA	NA
NA	OR5P2	NA	NA	NA	NA	NA	NA	NA	NA	NA	NA	NA	NA	NA
NA	OR5P3	NA	NA	NA	NA	NA	NA	NA	NA	NA	NA	NA	NA	NA
NA	ORAI3	NA	NA	NA	NA	NA	NA	NA	NA	NA	NA	NA	NA	NA
NA	ORMDL3	NA	NA	NA	NA	NA	NA	NA	NA	NA	NA	NA	NA	NA
NA	OSBPL3	NA	NA	NA	NA	NA	NA	NA	NA	NA	NA	NA	NA	NA
NA	OSM	NA	NA	NA	NA	NA	NA	NA	NA	NA	NA	NA	NA	NA
NA	OSR2	NA	NA	NA	NA	NA	NA	NA	NA	NA	NA	NA	NA	NA
NA	OSTC	NA	NA	NA	NA	NA	NA	NA	NA	NA	NA	NA	NA	NA
NA	OSTM1	NA	NA	NA	NA	NA	NA	NA	NA	NA	NA	NA	NA	NA
NA	OTUB2	NA	NA	NA	NA	NA	NA	NA	NA	NA	NA	NA	NA	NA
NA	OVCH2	NA	NA	NA	NA	NA	NA	NA	NA	NA	NA	NA	NA	NA
NA	OVGP1	NA	NA	NA	NA	NA	NA	NA	NA	NA	NA	NA	NA	NA
NA	OXTR	NA	NA	NA	NA	NA	NA	NA	NA	NA	NA	NA	NA	NA
NA	P4HA1	NA	NA	NA	NA	NA	NA	NA	NA	NA	NA	NA	NA	NA
NA	P4HA2	NA	NA	NA	NA	NA	NA	NA	NA	NA	NA	NA	NA	NA
NA	P4HB	NA	NA	NA	NA	NA	NA	NA	NA	NA	NA	NA	NA	NA
NA	PACS1	NA	NA	NA	NA	NA	NA	NA	NA	NA	NA	NA	NA	NA
NA	PACS2	NA	NA	NA	NA	NA	NA	NA	NA	NA	NA	NA	NA	NA
NA	PAG1	NA	NA	NA	NA	NA	NA	NA	NA	NA	NA	NA	NA	NA
NA	PALMD	NA	NA	NA	NA	NA	NA	NA	NA	NA	NA	NA	NA	NA
NA	PAM	NA	NA	NA	NA	NA	NA	NA	NA	NA	NA	NA	NA	NA
NA	PAMR1	NA	NA	NA	NA	NA	NA	NA	NA	NA	NA	NA	NA	NA
NA	PAPPA	NA	NA	NA	NA	NA	NA	NA	NA	NA	NA	NA	NA	NA
NA	PAPPA2	NA	NA	NA	NA	NA	NA	NA	NA	NA	NA	NA	NA	NA
NA	PAPSS2	NA	NA	NA	NA	NA	NA	NA	NA	NA	NA	NA	NA	NA
NA	PAQR7	NA	NA	NA	NA	NA	NA	NA	NA	NA	NA	NA	NA	NA
NA	PARD6G	NA	NA	NA	NA	NA	NA	NA	NA	NA	NA	NA	NA	NA
NA	PAWR	NA	NA	NA	NA	NA	NA	NA	NA	NA	NA	NA	NA	NA
NA	PBLD	NA	NA	NA	NA	NA	NA	NA	NA	NA	NA	NA	NA	NA
NA	PBXIP1	NA	NA	NA	NA	NA	NA	NA	NA	NA	NA	NA	NA	NA
NA	PCBD1	NA	NA	NA	NA	NA	NA	NA	NA	NA	NA	NA	NA	NA
NA	PCDH1	NA	NA	NA	NA	NA	NA	NA	NA	NA	NA	NA	NA	NA
NA	PCDHA10	NA	NA	NA	NA	NA	NA	NA	NA	NA	NA	NA	NA	NA
NA	PCDHA13	NA	NA	NA	NA	NA	NA	NA	NA	NA	NA	NA	NA	NA
NA	PCDHA3	NA	NA	NA	NA	NA	NA	NA	NA	NA	NA	NA	NA	NA
NA	PCDHA4	NA	NA	NA	NA	NA	NA	NA	NA	NA	NA	NA	NA	NA
NA	PCDHA7	NA	NA	NA	NA	NA	NA	NA	NA	NA	NA	NA	NA	NA
NA	PCDHB10	NA	NA	NA	NA	NA	NA	NA	NA	NA	NA	NA	NA	NA
NA	PCDHB11	NA	NA	NA	NA	NA	NA	NA	NA	NA	NA	NA	NA	NA
NA	PCDHB12	NA	NA	NA	NA	NA	NA	NA	NA	NA	NA	NA	NA	NA
NA	PCDHB13	NA	NA	NA	NA	NA	NA	NA	NA	NA	NA	NA	NA	NA
NA	PCDHB14	NA	NA	NA	NA	NA	NA	NA	NA	NA	NA	NA	NA	NA
NA	PCDHB15	NA	NA	NA	NA	NA	NA	NA	NA	NA	NA	NA	NA	NA
NA	PCDHB16	NA	NA	NA	NA	NA	NA	NA	NA	NA	NA	NA	NA	NA
NA	PCDHB2	NA	NA	NA	NA	NA	NA	NA	NA	NA	NA	NA	NA	NA
NA	PCDHB5	NA	NA	NA	NA	NA	NA	NA	NA	NA	NA	NA	NA	NA
NA	PCDHB6	NA	NA	NA	NA	NA	NA	NA	NA	NA	NA	NA	NA	NA
NA	PCDHB8	NA	NA	NA	NA	NA	NA	NA	NA	NA	NA	NA	NA	NA
NA	PCDHB9	NA	NA	NA	NA	NA	NA	NA	NA	NA	NA	NA	NA	NA
NA	PCMTD1	NA	NA	NA	NA	NA	NA	NA	NA	NA	NA	NA	NA	NA
NA	PCSK5	NA	NA	NA	NA	NA	NA	NA	NA	NA	NA	NA	NA	NA
NA	PCSK7	NA	NA	NA	NA	NA	NA	NA	NA	NA	NA	NA	NA	NA
NA	PCYOX1	NA	NA	NA	NA	NA	NA	NA	NA	NA	NA	NA	NA	NA
NA	PCYT1A	NA	NA	NA	NA	NA	NA	NA	NA	NA	NA	NA	NA	NA
NA	PDCD1LG2	NA	NA	NA	NA	NA	NA	NA	NA	NA	NA	NA	NA	NA
NA	PDCD4	NA	NA	NA	NA	NA	NA	NA	NA	NA	NA	NA	NA	NA
NA	PDE11A	NA	NA	NA	NA	NA	NA	NA	NA	NA	NA	NA	NA	NA
NA	PDE1C	NA	NA	NA	NA	NA	NA	NA	NA	NA	NA	NA	NA	NA
NA	PDE8B	NA	NA	NA	NA	NA	NA	NA	NA	NA	NA	NA	NA	NA
NA	PDGFB	NA	NA	NA	NA	NA	NA	NA	NA	NA	NA	NA	NA	NA
NA	PDK4	NA	NA	NA	NA	NA	NA	NA	NA	NA	NA	NA	NA	NA
NA	PDLIM2	NA	NA	NA	NA	NA	NA	NA	NA	NA	NA	NA	NA	NA
NA	PDLIM5	NA	NA	NA	NA	NA	NA	NA	NA	NA	NA	NA	NA	NA
NA	PDZD7	NA	NA	NA	NA	NA	NA	NA	NA	NA	NA	NA	NA	NA
NA	PEA15	NA	NA	NA	NA	NA	NA	NA	NA	NA	NA	NA	NA	NA
NA	PEBP4	NA	NA	NA	NA	NA	NA	NA	NA	NA	NA	NA	NA	NA
NA	PERP	NA	NA	NA	NA	NA	NA	NA	NA	NA	NA	NA	NA	NA
NA	PFKFB2	NA	NA	NA	NA	NA	NA	NA	NA	NA	NA	NA	NA	NA
NA	PFKFB3	NA	NA	NA	NA	NA	NA	NA	NA	NA	NA	NA	NA	NA
NA	PFKFB4	NA	NA	NA	NA	NA	NA	NA	NA	NA	NA	NA	NA	NA
NA	PGC	NA	NA	NA	NA	NA	NA	NA	NA	NA	NA	NA	NA	NA
NA	PGM2L1	NA	NA	NA	NA	NA	NA	NA	NA	NA	NA	NA	NA	NA
NA	PGM5	NA	NA	NA	NA	NA	NA	NA	NA	NA	NA	NA	NA	NA
NA	PGRMC1	NA	NA	NA	NA	NA	NA	NA	NA	NA	NA	NA	NA	NA
NA	PGRMC2	NA	NA	NA	NA	NA	NA	NA	NA	NA	NA	NA	NA	NA
NA	PHACTR2	NA	NA	NA	NA	NA	NA	NA	NA	NA	NA	NA	NA	NA
NA	PHEX	NA	NA	NA	NA	NA	NA	NA	NA	NA	NA	NA	NA	NA
NA	PHKA1	NA	NA	NA	NA	NA	NA	NA	NA	NA	NA	NA	NA	NA
NA	PHLDA3	NA	NA	NA	NA	NA	NA	NA	NA	NA	NA	NA	NA	NA
NA	PHLDB1	NA	NA	NA	NA	NA	NA	NA	NA	NA	NA	NA	NA	NA
NA	PHLDB3	NA	NA	NA	NA	NA	NA	NA	NA	NA	NA	NA	NA	NA
NA	PI16	NA	NA	NA	NA	NA	NA	NA	NA	NA	NA	NA	NA	NA
NA	PI3	NA	NA	NA	NA	NA	NA	NA	NA	NA	NA	NA	NA	NA
NA	PICALM	NA	NA	NA	NA	NA	NA	NA	NA	NA	NA	NA	NA	NA
NA	PIGV	NA	NA	NA	NA	NA	NA	NA	NA	NA	NA	NA	NA	NA
NA	PIGZ	NA	NA	NA	NA	NA	NA	NA	NA	NA	NA	NA	NA	NA
NA	PIK3AP1	NA	NA	NA	NA	NA	NA	NA	NA	NA	NA	NA	NA	NA
NA	PIK3C3	NA	NA	NA	NA	NA	NA	NA	NA	NA	NA	NA	NA	NA
NA	PIK3CA	NA	NA	NA	NA	NA	NA	NA	NA	NA	NA	NA	NA	NA
NA	PIK3IP1	NA	NA	NA	NA	NA	NA	NA	NA	NA	NA	NA	NA	NA
NA	PIP4K2C	NA	NA	NA	NA	NA	NA	NA	NA	NA	NA	NA	NA	NA
NA	PIP5KL1	NA	NA	NA	NA	NA	NA	NA	NA	NA	NA	NA	NA	NA
NA	PITPNM3	NA	NA	NA	NA	NA	NA	NA	NA	NA	NA	NA	NA	NA
NA	PKP2	NA	NA	NA	NA	NA	NA	NA	NA	NA	NA	NA	NA	NA
NA	PLA2G15	NA	NA	NA	NA	NA	NA	NA	NA	NA	NA	NA	NA	NA
NA	PLA2G16	NA	NA	NA	NA	NA	NA	NA	NA	NA	NA	NA	NA	NA
NA	PLA2G4C	NA	NA	NA	NA	NA	NA	NA	NA	NA	NA	NA	NA	NA
NA	PLA2R1	NA	NA	NA	NA	NA	NA	NA	NA	NA	NA	NA	NA	NA
NA	PLAT	NA	NA	NA	NA	NA	NA	NA	NA	NA	NA	NA	NA	NA
NA	PLBD2	NA	NA	NA	NA	NA	NA	NA	NA	NA	NA	NA	NA	NA
NA	PLCB4	NA	NA	NA	NA	NA	NA	NA	NA	NA	NA	NA	NA	NA
NA	PLCE1	NA	NA	NA	NA	NA	NA	NA	NA	NA	NA	NA	NA	NA
NA	PLD3	NA	NA	NA	NA	NA	NA	NA	NA	NA	NA	NA	NA	NA
NA	PLEKHA1	NA	NA	NA	NA	NA	NA	NA	NA	NA	NA	NA	NA	NA
NA	PLEKHB2	NA	NA	NA	NA	NA	NA	NA	NA	NA	NA	NA	NA	NA
NA	PLK3	NA	NA	NA	NA	NA	NA	NA	NA	NA	NA	NA	NA	NA
NA	PLOD1	NA	NA	NA	NA	NA	NA	NA	NA	NA	NA	NA	NA	NA
NA	PLOD2	NA	NA	NA	NA	NA	NA	NA	NA	NA	NA	NA	NA	NA
NA	PLSCR4	NA	NA	NA	NA	NA	NA	NA	NA	NA	NA	NA	NA	NA
NA	PLXDC2	NA	NA	NA	NA	NA	NA	NA	NA	NA	NA	NA	NA	NA
NA	PLXNA1	NA	NA	NA	NA	NA	NA	NA	NA	NA	NA	NA	NA	NA
NA	PLXNA2	NA	NA	NA	NA	NA	NA	NA	NA	NA	NA	NA	NA	NA
NA	PLXNA3	NA	NA	NA	NA	NA	NA	NA	NA	NA	NA	NA	NA	NA
NA	PLXNB3	NA	NA	NA	NA	NA	NA	NA	NA	NA	NA	NA	NA	NA
NA	PLXND1	NA	NA	NA	NA	NA	NA	NA	NA	NA	NA	NA	NA	NA
NA	PMAIP1	NA	NA	NA	NA	NA	NA	NA	NA	NA	NA	NA	NA	NA
NA	PMEPA1	NA	NA	NA	NA	NA	NA	NA	NA	NA	NA	NA	NA	NA
NA	PNPLA2	NA	NA	NA	NA	NA	NA	NA	NA	NA	NA	NA	NA	NA
NA	PNRC1	NA	NA	NA	NA	NA	NA	NA	NA	NA	NA	NA	NA	NA
NA	POLD4	NA	NA	NA	NA	NA	NA	NA	NA	NA	NA	NA	NA	NA
NA	POLH	NA	NA	NA	NA	NA	NA	NA	NA	NA	NA	NA	NA	NA
NA	POMT1	NA	NA	NA	NA	NA	NA	NA	NA	NA	NA	NA	NA	NA
NA	PON2	NA	NA	NA	NA	NA	NA	NA	NA	NA	NA	NA	NA	NA
NA	PORCN	NA	NA	NA	NA	NA	NA	NA	NA	NA	NA	NA	NA	NA
NA	POU2F2	NA	NA	NA	NA	NA	NA	NA	NA	NA	NA	NA	NA	NA
NA	PPFIA1	NA	NA	NA	NA	NA	NA	NA	NA	NA	NA	NA	NA	NA
NA	PPFIA4	NA	NA	NA	NA	NA	NA	NA	NA	NA	NA	NA	NA	NA
NA	PPFIBP1	NA	NA	NA	NA	NA	NA	NA	NA	NA	NA	NA	NA	NA
NA	PPFIBP2	NA	NA	NA	NA	NA	NA	NA	NA	NA	NA	NA	NA	NA
NA	PPIC	NA	NA	NA	NA	NA	NA	NA	NA	NA	NA	NA	NA	NA
NA	PPM1K	NA	NA	NA	NA	NA	NA	NA	NA	NA	NA	NA	NA	NA
NA	PPME1	NA	NA	NA	NA	NA	NA	NA	NA	NA	NA	NA	NA	NA
NA	PPP1R13L	NA	NA	NA	NA	NA	NA	NA	NA	NA	NA	NA	NA	NA
NA	PPP1R14A	NA	NA	NA	NA	NA	NA	NA	NA	NA	NA	NA	NA	NA
NA	PPP1R16A	NA	NA	NA	NA	NA	NA	NA	NA	NA	NA	NA	NA	NA
NA	PPP1R2	NA	NA	NA	NA	NA	NA	NA	NA	NA	NA	NA	NA	NA
NA	PPP1R3C	NA	NA	NA	NA	NA	NA	NA	NA	NA	NA	NA	NA	NA
NA	PPP2R5B	NA	NA	NA	NA	NA	NA	NA	NA	NA	NA	NA	NA	NA
NA	PPP3CC	NA	NA	NA	NA	NA	NA	NA	NA	NA	NA	NA	NA	NA
NA	PPP4R4	NA	NA	NA	NA	NA	NA	NA	NA	NA	NA	NA	NA	NA
NA	PPP6R2	NA	NA	NA	NA	NA	NA	NA	NA	NA	NA	NA	NA	NA
NA	PRAF2	NA	NA	NA	NA	NA	NA	NA	NA	NA	NA	NA	NA	NA
NA	PRDM1	NA	NA	NA	NA	NA	NA	NA	NA	NA	NA	NA	NA	NA
NA	PRDX4	NA	NA	NA	NA	NA	NA	NA	NA	NA	NA	NA	NA	NA
NA	PRDX5	NA	NA	NA	NA	NA	NA	NA	NA	NA	NA	NA	NA	NA
NA	PRDX6	NA	NA	NA	NA	NA	NA	NA	NA	NA	NA	NA	NA	NA
NA	PRICKLE1	NA	NA	NA	NA	NA	NA	NA	NA	NA	NA	NA	NA	NA
NA	PRICKLE2	NA	NA	NA	NA	NA	NA	NA	NA	NA	NA	NA	NA	NA
NA	PRKAB2	NA	NA	NA	NA	NA	NA	NA	NA	NA	NA	NA	NA	NA
NA	PRKCH	NA	NA	NA	NA	NA	NA	NA	NA	NA	NA	NA	NA	NA
NA	PRLH	NA	NA	NA	NA	NA	NA	NA	NA	NA	NA	NA	NA	NA
NA	PRNP	NA	NA	NA	NA	NA	NA	NA	NA	NA	NA	NA	NA	NA
NA	PROK2	NA	NA	NA	NA	NA	NA	NA	NA	NA	NA	NA	NA	NA
NA	PROS1	NA	NA	NA	NA	NA	NA	NA	NA	NA	NA	NA	NA	NA
NA	PRPS1	NA	NA	NA	NA	NA	NA	NA	NA	NA	NA	NA	NA	NA
NA	PRR5L	NA	NA	NA	NA	NA	NA	NA	NA	NA	NA	NA	NA	NA
NA	PRRG1	NA	NA	NA	NA	NA	NA	NA	NA	NA	NA	NA	NA	NA
NA	PRSS23	NA	NA	NA	NA	NA	NA	NA	NA	NA	NA	NA	NA	NA
NA	PSAP	NA	NA	NA	NA	NA	NA	NA	NA	NA	NA	NA	NA	NA
NA	PSCA	NA	NA	NA	NA	NA	NA	NA	NA	NA	NA	NA	NA	NA
NA	PSD4	NA	NA	NA	NA	NA	NA	NA	NA	NA	NA	NA	NA	NA
NA	PSG1	NA	NA	NA	NA	NA	NA	NA	NA	NA	NA	NA	NA	NA
NA	PSG11	NA	NA	NA	NA	NA	NA	NA	NA	NA	NA	NA	NA	NA
NA	PSG2	NA	NA	NA	NA	NA	NA	NA	NA	NA	NA	NA	NA	NA
NA	PSG3	NA	NA	NA	NA	NA	NA	NA	NA	NA	NA	NA	NA	NA
NA	PSG9	NA	NA	NA	NA	NA	NA	NA	NA	NA	NA	NA	NA	NA
NA	PSPN	NA	NA	NA	NA	NA	NA	NA	NA	NA	NA	NA	NA	NA
NA	PSTPIP2	NA	NA	NA	NA	NA	NA	NA	NA	NA	NA	NA	NA	NA
NA	PTGFR	NA	NA	NA	NA	NA	NA	NA	NA	NA	NA	NA	NA	NA
NA	PTGFRN	NA	NA	NA	NA	NA	NA	NA	NA	NA	NA	NA	NA	NA
NA	PTGIR	NA	NA	NA	NA	NA	NA	NA	NA	NA	NA	NA	NA	NA
NA	PTGS2	NA	NA	NA	NA	NA	NA	NA	NA	NA	NA	NA	NA	NA
NA	PTHLH	NA	NA	NA	NA	NA	NA	NA	NA	NA	NA	NA	NA	NA
NA	PTP4A1	NA	NA	NA	NA	NA	NA	NA	NA	NA	NA	NA	NA	NA
NA	PTP4A3	NA	NA	NA	NA	NA	NA	NA	NA	NA	NA	NA	NA	NA
NA	PTPN13	NA	NA	NA	NA	NA	NA	NA	NA	NA	NA	NA	NA	NA
NA	PTPRB	NA	NA	NA	NA	NA	NA	NA	NA	NA	NA	NA	NA	NA
NA	PTPRE	NA	NA	NA	NA	NA	NA	NA	NA	NA	NA	NA	NA	NA
NA	PTPRF	NA	NA	NA	NA	NA	NA	NA	NA	NA	NA	NA	NA	NA
NA	PTPRK	NA	NA	NA	NA	NA	NA	NA	NA	NA	NA	NA	NA	NA
NA	PTPRM	NA	NA	NA	NA	NA	NA	NA	NA	NA	NA	NA	NA	NA
NA	PTPRU	NA	NA	NA	NA	NA	NA	NA	NA	NA	NA	NA	NA	NA
NA	PURA	NA	NA	NA	NA	NA	NA	NA	NA	NA	NA	NA	NA	NA
NA	PXDNL	NA	NA	NA	NA	NA	NA	NA	NA	NA	NA	NA	NA	NA
NA	PYGB	NA	NA	NA	NA	NA	NA	NA	NA	NA	NA	NA	NA	NA
NA	PYGL	NA	NA	NA	NA	NA	NA	NA	NA	NA	NA	NA	NA	NA
NA	QPCT	NA	NA	NA	NA	NA	NA	NA	NA	NA	NA	NA	NA	NA
NA	QPCTL	NA	NA	NA	NA	NA	NA	NA	NA	NA	NA	NA	NA	NA
NA	QPRT	NA	NA	NA	NA	NA	NA	NA	NA	NA	NA	NA	NA	NA
NA	RAB11A	NA	NA	NA	NA	NA	NA	NA	NA	NA	NA	NA	NA	NA
NA	RAB11FIP5	NA	NA	NA	NA	NA	NA	NA	NA	NA	NA	NA	NA	NA
NA	RAB26	NA	NA	NA	NA	NA	NA	NA	NA	NA	NA	NA	NA	NA
NA	RAB33B	NA	NA	NA	NA	NA	NA	NA	NA	NA	NA	NA	NA	NA
NA	RAB3A	NA	NA	NA	NA	NA	NA	NA	NA	NA	NA	NA	NA	NA
NA	RAB40B	NA	NA	NA	NA	NA	NA	NA	NA	NA	NA	NA	NA	NA
NA	RAB5A	NA	NA	NA	NA	NA	NA	NA	NA	NA	NA	NA	NA	NA
NA	RAB6B	NA	NA	NA	NA	NA	NA	NA	NA	NA	NA	NA	NA	NA
NA	RABGAP1L	NA	NA	NA	NA	NA	NA	NA	NA	NA	NA	NA	NA	NA
NA	RAI14	NA	NA	NA	NA	NA	NA	NA	NA	NA	NA	NA	NA	NA
NA	RAP1GAP2	NA	NA	NA	NA	NA	NA	NA	NA	NA	NA	NA	NA	NA
NA	RAPGEF2	NA	NA	NA	NA	NA	NA	NA	NA	NA	NA	NA	NA	NA
NA	RAPGEF3	NA	NA	NA	NA	NA	NA	NA	NA	NA	NA	NA	NA	NA
NA	RAPH1	NA	NA	NA	NA	NA	NA	NA	NA	NA	NA	NA	NA	NA
NA	RASA2	NA	NA	NA	NA	NA	NA	NA	NA	NA	NA	NA	NA	NA
NA	RASA4	NA	NA	NA	NA	NA	NA	NA	NA	NA	NA	NA	NA	NA
NA	RASGRP1	NA	NA	NA	NA	NA	NA	NA	NA	NA	NA	NA	NA	NA
NA	RASSF7	NA	NA	NA	NA	NA	NA	NA	NA	NA	NA	NA	NA	NA
NA	RBM24	NA	NA	NA	NA	NA	NA	NA	NA	NA	NA	NA	NA	NA
NA	RBMS1	NA	NA	NA	NA	NA	NA	NA	NA	NA	NA	NA	NA	NA
NA	RBMS2	NA	NA	NA	NA	NA	NA	NA	NA	NA	NA	NA	NA	NA
NA	RBP5	NA	NA	NA	NA	NA	NA	NA	NA	NA	NA	NA	NA	NA
NA	RCAN1	NA	NA	NA	NA	NA	NA	NA	NA	NA	NA	NA	NA	NA
NA	RCOR3	NA	NA	NA	NA	NA	NA	NA	NA	NA	NA	NA	NA	NA
NA	RDH10	NA	NA	NA	NA	NA	NA	NA	NA	NA	NA	NA	NA	NA
NA	RECK	NA	NA	NA	NA	NA	NA	NA	NA	NA	NA	NA	NA	NA
NA	REEP2	NA	NA	NA	NA	NA	NA	NA	NA	NA	NA	NA	NA	NA
NA	REEP3	NA	NA	NA	NA	NA	NA	NA	NA	NA	NA	NA	NA	NA
NA	REEP5	NA	NA	NA	NA	NA	NA	NA	NA	NA	NA	NA	NA	NA
NA	REEP6	NA	NA	NA	NA	NA	NA	NA	NA	NA	NA	NA	NA	NA
NA	REN	NA	NA	NA	NA	NA	NA	NA	NA	NA	NA	NA	NA	NA
NA	RETSAT	NA	NA	NA	NA	NA	NA	NA	NA	NA	NA	NA	NA	NA
NA	RFTN1	NA	NA	NA	NA	NA	NA	NA	NA	NA	NA	NA	NA	NA
NA	RGL3	NA	NA	NA	NA	NA	NA	NA	NA	NA	NA	NA	NA	NA
NA	RGS11	NA	NA	NA	NA	NA	NA	NA	NA	NA	NA	NA	NA	NA
NA	RGS4	NA	NA	NA	NA	NA	NA	NA	NA	NA	NA	NA	NA	NA
NA	RGS5	NA	NA	NA	NA	NA	NA	NA	NA	NA	NA	NA	NA	NA
NA	RGS9	NA	NA	NA	NA	NA	NA	NA	NA	NA	NA	NA	NA	NA
NA	RHBDD2	NA	NA	NA	NA	NA	NA	NA	NA	NA	NA	NA	NA	NA
NA	RHBDF1	NA	NA	NA	NA	NA	NA	NA	NA	NA	NA	NA	NA	NA
NA	RHBDF2	NA	NA	NA	NA	NA	NA	NA	NA	NA	NA	NA	NA	NA
NA	RHBDL2	NA	NA	NA	NA	NA	NA	NA	NA	NA	NA	NA	NA	NA
NA	RHCG	NA	NA	NA	NA	NA	NA	NA	NA	NA	NA	NA	NA	NA
NA	RHD	NA	NA	NA	NA	NA	NA	NA	NA	NA	NA	NA	NA	NA
NA	RHOC	NA	NA	NA	NA	NA	NA	NA	NA	NA	NA	NA	NA	NA
NA	RHOJ	NA	NA	NA	NA	NA	NA	NA	NA	NA	NA	NA	NA	NA
NA	RHOQ	NA	NA	NA	NA	NA	NA	NA	NA	NA	NA	NA	NA	NA
NA	RHOV	NA	NA	NA	NA	NA	NA	NA	NA	NA	NA	NA	NA	NA
NA	RIMS1	NA	NA	NA	NA	NA	NA	NA	NA	NA	NA	NA	NA	NA
NA	RIN2	NA	NA	NA	NA	NA	NA	NA	NA	NA	NA	NA	NA	NA
NA	RIOK3	NA	NA	NA	NA	NA	NA	NA	NA	NA	NA	NA	NA	NA
NA	RIT1	NA	NA	NA	NA	NA	NA	NA	NA	NA	NA	NA	NA	NA
NA	RNASET2	NA	NA	NA	NA	NA	NA	NA	NA	NA	NA	NA	NA	NA
NA	RNF11	NA	NA	NA	NA	NA	NA	NA	NA	NA	NA	NA	NA	NA
NA	RNF13	NA	NA	NA	NA	NA	NA	NA	NA	NA	NA	NA	NA	NA
NA	RNF14	NA	NA	NA	NA	NA	NA	NA	NA	NA	NA	NA	NA	NA
NA	RNF141	NA	NA	NA	NA	NA	NA	NA	NA	NA	NA	NA	NA	NA
NA	RNF144B	NA	NA	NA	NA	NA	NA	NA	NA	NA	NA	NA	NA	NA
NA	RNF150	NA	NA	NA	NA	NA	NA	NA	NA	NA	NA	NA	NA	NA
NA	RNF152	NA	NA	NA	NA	NA	NA	NA	NA	NA	NA	NA	NA	NA
NA	RNF170	NA	NA	NA	NA	NA	NA	NA	NA	NA	NA	NA	NA	NA
NA	RNF181	NA	NA	NA	NA	NA	NA	NA	NA	NA	NA	NA	NA	NA
NA	RNF19A	NA	NA	NA	NA	NA	NA	NA	NA	NA	NA	NA	NA	NA
NA	RNF24	NA	NA	NA	NA	NA	NA	NA	NA	NA	NA	NA	NA	NA
NA	ROGDI	NA	NA	NA	NA	NA	NA	NA	NA	NA	NA	NA	NA	NA
NA	ROMO1	NA	NA	NA	NA	NA	NA	NA	NA	NA	NA	NA	NA	NA
NA	ROR1	NA	NA	NA	NA	NA	NA	NA	NA	NA	NA	NA	NA	NA
NA	RORA	NA	NA	NA	NA	NA	NA	NA	NA	NA	NA	NA	NA	NA
NA	RPL3L	NA	NA	NA	NA	NA	NA	NA	NA	NA	NA	NA	NA	NA
NA	RPRM	NA	NA	NA	NA	NA	NA	NA	NA	NA	NA	NA	NA	NA
NA	RPS27L	NA	NA	NA	NA	NA	NA	NA	NA	NA	NA	NA	NA	NA
NA	RPS6KL1	NA	NA	NA	NA	NA	NA	NA	NA	NA	NA	NA	NA	NA
NA	RRAD	NA	NA	NA	NA	NA	NA	NA	NA	NA	NA	NA	NA	NA
NA	RRAGC	NA	NA	NA	NA	NA	NA	NA	NA	NA	NA	NA	NA	NA
NA	RRAS	NA	NA	NA	NA	NA	NA	NA	NA	NA	NA	NA	NA	NA
NA	RRM2B	NA	NA	NA	NA	NA	NA	NA	NA	NA	NA	NA	NA	NA
NA	RSPH3	NA	NA	NA	NA	NA	NA	NA	NA	NA	NA	NA	NA	NA
NA	RSPO1	NA	NA	NA	NA	NA	NA	NA	NA	NA	NA	NA	NA	NA
NA	RSU1	NA	NA	NA	NA	NA	NA	NA	NA	NA	NA	NA	NA	NA
NA	RTN1	NA	NA	NA	NA	NA	NA	NA	NA	NA	NA	NA	NA	NA
NA	RUNX1	NA	NA	NA	NA	NA	NA	NA	NA	NA	NA	NA	NA	NA
NA	RUSC2	NA	NA	NA	NA	NA	NA	NA	NA	NA	NA	NA	NA	NA
NA	RWDD2A	NA	NA	NA	NA	NA	NA	NA	NA	NA	NA	NA	NA	NA
NA	SAA2	NA	NA	NA	NA	NA	NA	NA	NA	NA	NA	NA	NA	NA
NA	SAMD10	NA	NA	NA	NA	NA	NA	NA	NA	NA	NA	NA	NA	NA
NA	SAMD12	NA	NA	NA	NA	NA	NA	NA	NA	NA	NA	NA	NA	NA
NA	SAMD14	NA	NA	NA	NA	NA	NA	NA	NA	NA	NA	NA	NA	NA
NA	SAMD3	NA	NA	NA	NA	NA	NA	NA	NA	NA	NA	NA	NA	NA
NA	SAMD4A	NA	NA	NA	NA	NA	NA	NA	NA	NA	NA	NA	NA	NA
NA	SAMD9	NA	NA	NA	NA	NA	NA	NA	NA	NA	NA	NA	NA	NA
NA	SAMD9L	NA	NA	NA	NA	NA	NA	NA	NA	NA	NA	NA	NA	NA
NA	SASH1	NA	NA	NA	NA	NA	NA	NA	NA	NA	NA	NA	NA	NA
NA	SAT1	NA	NA	NA	NA	NA	NA	NA	NA	NA	NA	NA	NA	NA
NA	SATB1	NA	NA	NA	NA	NA	NA	NA	NA	NA	NA	NA	NA	NA
NA	SBDS	NA	NA	NA	NA	NA	NA	NA	NA	NA	NA	NA	NA	NA
NA	SCAMP1	NA	NA	NA	NA	NA	NA	NA	NA	NA	NA	NA	NA	NA
NA	SCAMP5	NA	NA	NA	NA	NA	NA	NA	NA	NA	NA	NA	NA	NA
NA	SCD5	NA	NA	NA	NA	NA	NA	NA	NA	NA	NA	NA	NA	NA
NA	SCG2	NA	NA	NA	NA	NA	NA	NA	NA	NA	NA	NA	NA	NA
NA	SCG5	NA	NA	NA	NA	NA	NA	NA	NA	NA	NA	NA	NA	NA
NA	SCGB2A1	NA	NA	NA	NA	NA	NA	NA	NA	NA	NA	NA	NA	NA
NA	SCIN	NA	NA	NA	NA	NA	NA	NA	NA	NA	NA	NA	NA	NA
NA	SCN2A	NA	NA	NA	NA	NA	NA	NA	NA	NA	NA	NA	NA	NA
NA	SCN8A	NA	NA	NA	NA	NA	NA	NA	NA	NA	NA	NA	NA	NA
NA	SCOC	NA	NA	NA	NA	NA	NA	NA	NA	NA	NA	NA	NA	NA
NA	SCUBE3	NA	NA	NA	NA	NA	NA	NA	NA	NA	NA	NA	NA	NA
NA	SDF2	NA	NA	NA	NA	NA	NA	NA	NA	NA	NA	NA	NA	NA
NA	SDF4	NA	NA	NA	NA	NA	NA	NA	NA	NA	NA	NA	NA	NA
NA	SEC14L1	NA	NA	NA	NA	NA	NA	NA	NA	NA	NA	NA	NA	NA
NA	SEC14L2	NA	NA	NA	NA	NA	NA	NA	NA	NA	NA	NA	NA	NA
NA	SEL1L3	NA	NA	NA	NA	NA	NA	NA	NA	NA	NA	NA	NA	NA
NA	SEMA3C	NA	NA	NA	NA	NA	NA	NA	NA	NA	NA	NA	NA	NA
NA	SEMA4F	NA	NA	NA	NA	NA	NA	NA	NA	NA	NA	NA	NA	NA
NA	SEMA5A	NA	NA	NA	NA	NA	NA	NA	NA	NA	NA	NA	NA	NA
NA	SEMA6A	NA	NA	NA	NA	NA	NA	NA	NA	NA	NA	NA	NA	NA
NA	SEMA6D	NA	NA	NA	NA	NA	NA	NA	NA	NA	NA	NA	NA	NA
NA	SERINC1	NA	NA	NA	NA	NA	NA	NA	NA	NA	NA	NA	NA	NA
NA	SERINC2	NA	NA	NA	NA	NA	NA	NA	NA	NA	NA	NA	NA	NA
NA	SERINC3	NA	NA	NA	NA	NA	NA	NA	NA	NA	NA	NA	NA	NA
NA	SERINC5	NA	NA	NA	NA	NA	NA	NA	NA	NA	NA	NA	NA	NA
NA	SERPINA1	NA	NA	NA	NA	NA	NA	NA	NA	NA	NA	NA	NA	NA
NA	SERPINA11	NA	NA	NA	NA	NA	NA	NA	NA	NA	NA	NA	NA	NA
NA	SERPINA3	NA	NA	NA	NA	NA	NA	NA	NA	NA	NA	NA	NA	NA
NA	SERPINA9	NA	NA	NA	NA	NA	NA	NA	NA	NA	NA	NA	NA	NA
NA	SERPINB7	NA	NA	NA	NA	NA	NA	NA	NA	NA	NA	NA	NA	NA
NA	SERPINB8	NA	NA	NA	NA	NA	NA	NA	NA	NA	NA	NA	NA	NA
NA	SERPINE1	NA	NA	NA	NA	NA	NA	NA	NA	NA	NA	NA	NA	NA
NA	SERPINE2	NA	NA	NA	NA	NA	NA	NA	NA	NA	NA	NA	NA	NA
NA	SERPINI1	NA	NA	NA	NA	NA	NA	NA	NA	NA	NA	NA	NA	NA
NA	SERTAD4	NA	NA	NA	NA	NA	NA	NA	NA	NA	NA	NA	NA	NA
NA	SESN1	NA	NA	NA	NA	NA	NA	NA	NA	NA	NA	NA	NA	NA
NA	SETD7	NA	NA	NA	NA	NA	NA	NA	NA	NA	NA	NA	NA	NA
NA	SEZ6L2	NA	NA	NA	NA	NA	NA	NA	NA	NA	NA	NA	NA	NA
NA	SFRP1	NA	NA	NA	NA	NA	NA	NA	NA	NA	NA	NA	NA	NA
NA	SFXN3	NA	NA	NA	NA	NA	NA	NA	NA	NA	NA	NA	NA	NA
NA	SGCB	NA	NA	NA	NA	NA	NA	NA	NA	NA	NA	NA	NA	NA
NA	SGIP1	NA	NA	NA	NA	NA	NA	NA	NA	NA	NA	NA	NA	NA
NA	SGK1	NA	NA	NA	NA	NA	NA	NA	NA	NA	NA	NA	NA	NA
NA	SGMS2	NA	NA	NA	NA	NA	NA	NA	NA	NA	NA	NA	NA	NA
NA	SGPP1	NA	NA	NA	NA	NA	NA	NA	NA	NA	NA	NA	NA	NA
NA	SGSH	NA	NA	NA	NA	NA	NA	NA	NA	NA	NA	NA	NA	NA
NA	SGTB	NA	NA	NA	NA	NA	NA	NA	NA	NA	NA	NA	NA	NA
NA	SH2D3A	NA	NA	NA	NA	NA	NA	NA	NA	NA	NA	NA	NA	NA
NA	SH3BGRL	NA	NA	NA	NA	NA	NA	NA	NA	NA	NA	NA	NA	NA
NA	SH3BGRL2	NA	NA	NA	NA	NA	NA	NA	NA	NA	NA	NA	NA	NA
NA	SH3BP5L	NA	NA	NA	NA	NA	NA	NA	NA	NA	NA	NA	NA	NA
NA	SH3GLB1	NA	NA	NA	NA	NA	NA	NA	NA	NA	NA	NA	NA	NA
NA	SH3PXD2A	NA	NA	NA	NA	NA	NA	NA	NA	NA	NA	NA	NA	NA
NA	SH3RF1	NA	NA	NA	NA	NA	NA	NA	NA	NA	NA	NA	NA	NA
NA	SH3RF2	NA	NA	NA	NA	NA	NA	NA	NA	NA	NA	NA	NA	NA
NA	SH3TC2	NA	NA	NA	NA	NA	NA	NA	NA	NA	NA	NA	NA	NA
NA	SHANK1	NA	NA	NA	NA	NA	NA	NA	NA	NA	NA	NA	NA	NA
NA	SHB	NA	NA	NA	NA	NA	NA	NA	NA	NA	NA	NA	NA	NA
NA	SHBG	NA	NA	NA	NA	NA	NA	NA	NA	NA	NA	NA	NA	NA
NA	SHC3	NA	NA	NA	NA	NA	NA	NA	NA	NA	NA	NA	NA	NA
NA	SHC4	NA	NA	NA	NA	NA	NA	NA	NA	NA	NA	NA	NA	NA
NA	SHOX2	NA	NA	NA	NA	NA	NA	NA	NA	NA	NA	NA	NA	NA
NA	SHROOM3	NA	NA	NA	NA	NA	NA	NA	NA	NA	NA	NA	NA	NA
NA	SHROOM4	NA	NA	NA	NA	NA	NA	NA	NA	NA	NA	NA	NA	NA
NA	SIL1	NA	NA	NA	NA	NA	NA	NA	NA	NA	NA	NA	NA	NA
NA	SIPA1L1	NA	NA	NA	NA	NA	NA	NA	NA	NA	NA	NA	NA	NA
NA	SLA	NA	NA	NA	NA	NA	NA	NA	NA	NA	NA	NA	NA	NA
NA	SLAMF8	NA	NA	NA	NA	NA	NA	NA	NA	NA	NA	NA	NA	NA
NA	SLC10A3	NA	NA	NA	NA	NA	NA	NA	NA	NA	NA	NA	NA	NA
NA	SLC10A6	NA	NA	NA	NA	NA	NA	NA	NA	NA	NA	NA	NA	NA
NA	SLC12A4	NA	NA	NA	NA	NA	NA	NA	NA	NA	NA	NA	NA	NA
NA	SLC15A4	NA	NA	NA	NA	NA	NA	NA	NA	NA	NA	NA	NA	NA
NA	SLC16A2	NA	NA	NA	NA	NA	NA	NA	NA	NA	NA	NA	NA	NA
NA	SLC16A3	NA	NA	NA	NA	NA	NA	NA	NA	NA	NA	NA	NA	NA
NA	SLC17A5	NA	NA	NA	NA	NA	NA	NA	NA	NA	NA	NA	NA	NA
NA	SLC19A2	NA	NA	NA	NA	NA	NA	NA	NA	NA	NA	NA	NA	NA
NA	SLC1A1	NA	NA	NA	NA	NA	NA	NA	NA	NA	NA	NA	NA	NA
NA	SLC1A7	NA	NA	NA	NA	NA	NA	NA	NA	NA	NA	NA	NA	NA
NA	SLC20A1	NA	NA	NA	NA	NA	NA	NA	NA	NA	NA	NA	NA	NA
NA	SLC20A2	NA	NA	NA	NA	NA	NA	NA	NA	NA	NA	NA	NA	NA
NA	SLC22A13	NA	NA	NA	NA	NA	NA	NA	NA	NA	NA	NA	NA	NA
NA	SLC22A15	NA	NA	NA	NA	NA	NA	NA	NA	NA	NA	NA	NA	NA
NA	SLC22A18	NA	NA	NA	NA	NA	NA	NA	NA	NA	NA	NA	NA	NA
NA	SLC22A23	NA	NA	NA	NA	NA	NA	NA	NA	NA	NA	NA	NA	NA
NA	SLC22A4	NA	NA	NA	NA	NA	NA	NA	NA	NA	NA	NA	NA	NA
NA	SLC22A5	NA	NA	NA	NA	NA	NA	NA	NA	NA	NA	NA	NA	NA
NA	SLC24A4	NA	NA	NA	NA	NA	NA	NA	NA	NA	NA	NA	NA	NA
NA	SLC25A20	NA	NA	NA	NA	NA	NA	NA	NA	NA	NA	NA	NA	NA
NA	SLC25A23	NA	NA	NA	NA	NA	NA	NA	NA	NA	NA	NA	NA	NA
NA	SLC25A4	NA	NA	NA	NA	NA	NA	NA	NA	NA	NA	NA	NA	NA
NA	SLC25A45	NA	NA	NA	NA	NA	NA	NA	NA	NA	NA	NA	NA	NA
NA	SLC26A1	NA	NA	NA	NA	NA	NA	NA	NA	NA	NA	NA	NA	NA
NA	SLC26A2	NA	NA	NA	NA	NA	NA	NA	NA	NA	NA	NA	NA	NA
NA	SLC27A4	NA	NA	NA	NA	NA	NA	NA	NA	NA	NA	NA	NA	NA
NA	SLC2A1	NA	NA	NA	NA	NA	NA	NA	NA	NA	NA	NA	NA	NA
NA	SLC2A10	NA	NA	NA	NA	NA	NA	NA	NA	NA	NA	NA	NA	NA
NA	SLC2A11	NA	NA	NA	NA	NA	NA	NA	NA	NA	NA	NA	NA	NA
NA	SLC2A13	NA	NA	NA	NA	NA	NA	NA	NA	NA	NA	NA	NA	NA
NA	SLC2A14	NA	NA	NA	NA	NA	NA	NA	NA	NA	NA	NA	NA	NA
NA	SLC2A6	NA	NA	NA	NA	NA	NA	NA	NA	NA	NA	NA	NA	NA
NA	SLC2A9	NA	NA	NA	NA	NA	NA	NA	NA	NA	NA	NA	NA	NA
NA	SLC30A4	NA	NA	NA	NA	NA	NA	NA	NA	NA	NA	NA	NA	NA
NA	SLC31A2	NA	NA	NA	NA	NA	NA	NA	NA	NA	NA	NA	NA	NA
NA	SLC33A1	NA	NA	NA	NA	NA	NA	NA	NA	NA	NA	NA	NA	NA
NA	SLC35A1	NA	NA	NA	NA	NA	NA	NA	NA	NA	NA	NA	NA	NA
NA	SLC35A3	NA	NA	NA	NA	NA	NA	NA	NA	NA	NA	NA	NA	NA
NA	SLC35B3	NA	NA	NA	NA	NA	NA	NA	NA	NA	NA	NA	NA	NA
NA	SLC35E1	NA	NA	NA	NA	NA	NA	NA	NA	NA	NA	NA	NA	NA
NA	SLC35E3	NA	NA	NA	NA	NA	NA	NA	NA	NA	NA	NA	NA	NA
NA	SLC35F3	NA	NA	NA	NA	NA	NA	NA	NA	NA	NA	NA	NA	NA
NA	SLC35F5	NA	NA	NA	NA	NA	NA	NA	NA	NA	NA	NA	NA	NA
NA	SLC36A1	NA	NA	NA	NA	NA	NA	NA	NA	NA	NA	NA	NA	NA
NA	SLC38A11	NA	NA	NA	NA	NA	NA	NA	NA	NA	NA	NA	NA	NA
NA	SLC38A7	NA	NA	NA	NA	NA	NA	NA	NA	NA	NA	NA	NA	NA
NA	SLC38A9	NA	NA	NA	NA	NA	NA	NA	NA	NA	NA	NA	NA	NA
NA	SLC39A10	NA	NA	NA	NA	NA	NA	NA	NA	NA	NA	NA	NA	NA
NA	SLC39A13	NA	NA	NA	NA	NA	NA	NA	NA	NA	NA	NA	NA	NA
NA	SLC39A6	NA	NA	NA	NA	NA	NA	NA	NA	NA	NA	NA	NA	NA
NA	SLC39A8	NA	NA	NA	NA	NA	NA	NA	NA	NA	NA	NA	NA	NA
NA	SLC41A2	NA	NA	NA	NA	NA	NA	NA	NA	NA	NA	NA	NA	NA
NA	SLC43A2	NA	NA	NA	NA	NA	NA	NA	NA	NA	NA	NA	NA	NA
NA	SLC44A3	NA	NA	NA	NA	NA	NA	NA	NA	NA	NA	NA	NA	NA
NA	SLC45A4	NA	NA	NA	NA	NA	NA	NA	NA	NA	NA	NA	NA	NA
NA	SLC46A3	NA	NA	NA	NA	NA	NA	NA	NA	NA	NA	NA	NA	NA
NA	SLC47A1	NA	NA	NA	NA	NA	NA	NA	NA	NA	NA	NA	NA	NA
NA	SLC4A11	NA	NA	NA	NA	NA	NA	NA	NA	NA	NA	NA	NA	NA
NA	SLC4A3	NA	NA	NA	NA	NA	NA	NA	NA	NA	NA	NA	NA	NA
NA	SLC4A5	NA	NA	NA	NA	NA	NA	NA	NA	NA	NA	NA	NA	NA
NA	SLC4A9	NA	NA	NA	NA	NA	NA	NA	NA	NA	NA	NA	NA	NA
NA	SLC5A3	NA	NA	NA	NA	NA	NA	NA	NA	NA	NA	NA	NA	NA
NA	SLC6A18	NA	NA	NA	NA	NA	NA	NA	NA	NA	NA	NA	NA	NA
NA	SLC6A4	NA	NA	NA	NA	NA	NA	NA	NA	NA	NA	NA	NA	NA
NA	SLC6A6	NA	NA	NA	NA	NA	NA	NA	NA	NA	NA	NA	NA	NA
NA	SLC7A5	NA	NA	NA	NA	NA	NA	NA	NA	NA	NA	NA	NA	NA
NA	SLC9A3R2	NA	NA	NA	NA	NA	NA	NA	NA	NA	NA	NA	NA	NA
NA	SLC9A7	NA	NA	NA	NA	NA	NA	NA	NA	NA	NA	NA	NA	NA
NA	SLCO2A1	NA	NA	NA	NA	NA	NA	NA	NA	NA	NA	NA	NA	NA
NA	SLFN5	NA	NA	NA	NA	NA	NA	NA	NA	NA	NA	NA	NA	NA
NA	SLURP1	NA	NA	NA	NA	NA	NA	NA	NA	NA	NA	NA	NA	NA
NA	SMOC1	NA	NA	NA	NA	NA	NA	NA	NA	NA	NA	NA	NA	NA
NA	SMPD1	NA	NA	NA	NA	NA	NA	NA	NA	NA	NA	NA	NA	NA
NA	SMURF2	NA	NA	NA	NA	NA	NA	NA	NA	NA	NA	NA	NA	NA
NA	SNAPC3	NA	NA	NA	NA	NA	NA	NA	NA	NA	NA	NA	NA	NA
NA	SNORA37	NA	NA	NA	NA	NA	NA	NA	NA	NA	NA	NA	NA	NA
NA	SNORA60	NA	NA	NA	NA	NA	NA	NA	NA	NA	NA	NA	NA	NA
NA	SNTA1	NA	NA	NA	NA	NA	NA	NA	NA	NA	NA	NA	NA	NA
NA	SNX24	NA	NA	NA	NA	NA	NA	NA	NA	NA	NA	NA	NA	NA
NA	SNX25	NA	NA	NA	NA	NA	NA	NA	NA	NA	NA	NA	NA	NA
NA	SOHLH1	NA	NA	NA	NA	NA	NA	NA	NA	NA	NA	NA	NA	NA
NA	SORBS1	NA	NA	NA	NA	NA	NA	NA	NA	NA	NA	NA	NA	NA
NA	SORCS2	NA	NA	NA	NA	NA	NA	NA	NA	NA	NA	NA	NA	NA
NA	SORT1	NA	NA	NA	NA	NA	NA	NA	NA	NA	NA	NA	NA	NA
NA	SP100	NA	NA	NA	NA	NA	NA	NA	NA	NA	NA	NA	NA	NA
NA	SPAG4	NA	NA	NA	NA	NA	NA	NA	NA	NA	NA	NA	NA	NA
NA	SPARC	NA	NA	NA	NA	NA	NA	NA	NA	NA	NA	NA	NA	NA
NA	SPATA18	NA	NA	NA	NA	NA	NA	NA	NA	NA	NA	NA	NA	NA
NA	SPATA20	NA	NA	NA	NA	NA	NA	NA	NA	NA	NA	NA	NA	NA
NA	SPATA22	NA	NA	NA	NA	NA	NA	NA	NA	NA	NA	NA	NA	NA
NA	SPINT2	NA	NA	NA	NA	NA	NA	NA	NA	NA	NA	NA	NA	NA
NA	SPNS2	NA	NA	NA	NA	NA	NA	NA	NA	NA	NA	NA	NA	NA
NA	SPOCK1	NA	NA	NA	NA	NA	NA	NA	NA	NA	NA	NA	NA	NA
NA	SPRN	NA	NA	NA	NA	NA	NA	NA	NA	NA	NA	NA	NA	NA
NA	SPRY3	NA	NA	NA	NA	NA	NA	NA	NA	NA	NA	NA	NA	NA
NA	SPRYD3	NA	NA	NA	NA	NA	NA	NA	NA	NA	NA	NA	NA	NA
NA	SPTAN1	NA	NA	NA	NA	NA	NA	NA	NA	NA	NA	NA	NA	NA
NA	SRD5A1	NA	NA	NA	NA	NA	NA	NA	NA	NA	NA	NA	NA	NA
NA	SRD5A3	NA	NA	NA	NA	NA	NA	NA	NA	NA	NA	NA	NA	NA
NA	SRGN	NA	NA	NA	NA	NA	NA	NA	NA	NA	NA	NA	NA	NA
NA	SRPK3	NA	NA	NA	NA	NA	NA	NA	NA	NA	NA	NA	NA	NA
NA	SRPX	NA	NA	NA	NA	NA	NA	NA	NA	NA	NA	NA	NA	NA
NA	SRPX2	NA	NA	NA	NA	NA	NA	NA	NA	NA	NA	NA	NA	NA
NA	SSC5D	NA	NA	NA	NA	NA	NA	NA	NA	NA	NA	NA	NA	NA
NA	ST3GAL5	NA	NA	NA	NA	NA	NA	NA	NA	NA	NA	NA	NA	NA
NA	ST3GAL6	NA	NA	NA	NA	NA	NA	NA	NA	NA	NA	NA	NA	NA
NA	ST6GALNAC5	NA	NA	NA	NA	NA	NA	NA	NA	NA	NA	NA	NA	NA
NA	STARD4	NA	NA	NA	NA	NA	NA	NA	NA	NA	NA	NA	NA	NA
NA	STC2	NA	NA	NA	NA	NA	NA	NA	NA	NA	NA	NA	NA	NA
NA	STIM1	NA	NA	NA	NA	NA	NA	NA	NA	NA	NA	NA	NA	NA
NA	STK10	NA	NA	NA	NA	NA	NA	NA	NA	NA	NA	NA	NA	NA
NA	STK17A	NA	NA	NA	NA	NA	NA	NA	NA	NA	NA	NA	NA	NA
NA	STK38	NA	NA	NA	NA	NA	NA	NA	NA	NA	NA	NA	NA	NA
NA	STK38L	NA	NA	NA	NA	NA	NA	NA	NA	NA	NA	NA	NA	NA
NA	STS	NA	NA	NA	NA	NA	NA	NA	NA	NA	NA	NA	NA	NA
NA	STX11	NA	NA	NA	NA	NA	NA	NA	NA	NA	NA	NA	NA	NA
NA	STX12	NA	NA	NA	NA	NA	NA	NA	NA	NA	NA	NA	NA	NA
NA	STX3	NA	NA	NA	NA	NA	NA	NA	NA	NA	NA	NA	NA	NA
NA	STX4	NA	NA	NA	NA	NA	NA	NA	NA	NA	NA	NA	NA	NA
NA	STX7	NA	NA	NA	NA	NA	NA	NA	NA	NA	NA	NA	NA	NA
NA	STXBP1	NA	NA	NA	NA	NA	NA	NA	NA	NA	NA	NA	NA	NA
NA	STXBP3	NA	NA	NA	NA	NA	NA	NA	NA	NA	NA	NA	NA	NA
NA	STXBP6	NA	NA	NA	NA	NA	NA	NA	NA	NA	NA	NA	NA	NA
NA	STYK1	NA	NA	NA	NA	NA	NA	NA	NA	NA	NA	NA	NA	NA
NA	SVEP1	NA	NA	NA	NA	NA	NA	NA	NA	NA	NA	NA	NA	NA
NA	SVIL	NA	NA	NA	NA	NA	NA	NA	NA	NA	NA	NA	NA	NA
NA	SYNGR2	NA	NA	NA	NA	NA	NA	NA	NA	NA	NA	NA	NA	NA
NA	SYNPO2L	NA	NA	NA	NA	NA	NA	NA	NA	NA	NA	NA	NA	NA
NA	SYPL2	NA	NA	NA	NA	NA	NA	NA	NA	NA	NA	NA	NA	NA
NA	SYT16	NA	NA	NA	NA	NA	NA	NA	NA	NA	NA	NA	NA	NA
NA	SYT17	NA	NA	NA	NA	NA	NA	NA	NA	NA	NA	NA	NA	NA
NA	SYTL3	NA	NA	NA	NA	NA	NA	NA	NA	NA	NA	NA	NA	NA
NA	SYTL5	NA	NA	NA	NA	NA	NA	NA	NA	NA	NA	NA	NA	NA
NA	TAB3	NA	NA	NA	NA	NA	NA	NA	NA	NA	NA	NA	NA	NA
NA	TACC1	NA	NA	NA	NA	NA	NA	NA	NA	NA	NA	NA	NA	NA
NA	TAF13	NA	NA	NA	NA	NA	NA	NA	NA	NA	NA	NA	NA	NA
NA	TAGLN	NA	NA	NA	NA	NA	NA	NA	NA	NA	NA	NA	NA	NA
NA	TAL2	NA	NA	NA	NA	NA	NA	NA	NA	NA	NA	NA	NA	NA
NA	TANC1	NA	NA	NA	NA	NA	NA	NA	NA	NA	NA	NA	NA	NA
NA	TAOK2	NA	NA	NA	NA	NA	NA	NA	NA	NA	NA	NA	NA	NA
NA	TAPBP	NA	NA	NA	NA	NA	NA	NA	NA	NA	NA	NA	NA	NA
NA	TAPT1	NA	NA	NA	NA	NA	NA	NA	NA	NA	NA	NA	NA	NA
NA	TARSL2	NA	NA	NA	NA	NA	NA	NA	NA	NA	NA	NA	NA	NA
NA	TBC1D17	NA	NA	NA	NA	NA	NA	NA	NA	NA	NA	NA	NA	NA
NA	TBC1D19	NA	NA	NA	NA	NA	NA	NA	NA	NA	NA	NA	NA	NA
NA	TBC1D2	NA	NA	NA	NA	NA	NA	NA	NA	NA	NA	NA	NA	NA
NA	TBC1D2B	NA	NA	NA	NA	NA	NA	NA	NA	NA	NA	NA	NA	NA
NA	TBC1D4	NA	NA	NA	NA	NA	NA	NA	NA	NA	NA	NA	NA	NA
NA	TBC1D8B	NA	NA	NA	NA	NA	NA	NA	NA	NA	NA	NA	NA	NA
NA	TBCEL	NA	NA	NA	NA	NA	NA	NA	NA	NA	NA	NA	NA	NA
NA	TCEAL4	NA	NA	NA	NA	NA	NA	NA	NA	NA	NA	NA	NA	NA
NA	TCF23	NA	NA	NA	NA	NA	NA	NA	NA	NA	NA	NA	NA	NA
NA	TCP11L1	NA	NA	NA	NA	NA	NA	NA	NA	NA	NA	NA	NA	NA
NA	TCTA	NA	NA	NA	NA	NA	NA	NA	NA	NA	NA	NA	NA	NA
NA	TDRKH	NA	NA	NA	NA	NA	NA	NA	NA	NA	NA	NA	NA	NA
NA	TERF2IP	NA	NA	NA	NA	NA	NA	NA	NA	NA	NA	NA	NA	NA
NA	TEX2	NA	NA	NA	NA	NA	NA	NA	NA	NA	NA	NA	NA	NA
NA	TEX264	NA	NA	NA	NA	NA	NA	NA	NA	NA	NA	NA	NA	NA
NA	TFAP2A	NA	NA	NA	NA	NA	NA	NA	NA	NA	NA	NA	NA	NA
NA	TFEB	NA	NA	NA	NA	NA	NA	NA	NA	NA	NA	NA	NA	NA
NA	TG	NA	NA	NA	NA	NA	NA	NA	NA	NA	NA	NA	NA	NA
NA	TGFB2	NA	NA	NA	NA	NA	NA	NA	NA	NA	NA	NA	NA	NA
NA	TGFBR2	NA	NA	NA	NA	NA	NA	NA	NA	NA	NA	NA	NA	NA
NA	TGM2	NA	NA	NA	NA	NA	NA	NA	NA	NA	NA	NA	NA	NA
NA	THAP8	NA	NA	NA	NA	NA	NA	NA	NA	NA	NA	NA	NA	NA
NA	THBS2	NA	NA	NA	NA	NA	NA	NA	NA	NA	NA	NA	NA	NA
NA	THEMIS	NA	NA	NA	NA	NA	NA	NA	NA	NA	NA	NA	NA	NA
NA	THY1	NA	NA	NA	NA	NA	NA	NA	NA	NA	NA	NA	NA	NA
NA	TIAM1	NA	NA	NA	NA	NA	NA	NA	NA	NA	NA	NA	NA	NA
NA	TIMP2	NA	NA	NA	NA	NA	NA	NA	NA	NA	NA	NA	NA	NA
NA	TIMP3	NA	NA	NA	NA	NA	NA	NA	NA	NA	NA	NA	NA	NA
NA	TK2	NA	NA	NA	NA	NA	NA	NA	NA	NA	NA	NA	NA	NA
NA	TLL2	NA	NA	NA	NA	NA	NA	NA	NA	NA	NA	NA	NA	NA
NA	TLR4	NA	NA	NA	NA	NA	NA	NA	NA	NA	NA	NA	NA	NA
NA	TM2D1	NA	NA	NA	NA	NA	NA	NA	NA	NA	NA	NA	NA	NA
NA	TM2D2	NA	NA	NA	NA	NA	NA	NA	NA	NA	NA	NA	NA	NA
NA	TM6SF2	NA	NA	NA	NA	NA	NA	NA	NA	NA	NA	NA	NA	NA
NA	TM7SF3	NA	NA	NA	NA	NA	NA	NA	NA	NA	NA	NA	NA	NA
NA	TMBIM1	NA	NA	NA	NA	NA	NA	NA	NA	NA	NA	NA	NA	NA
NA	TMC6	NA	NA	NA	NA	NA	NA	NA	NA	NA	NA	NA	NA	NA
NA	TMCC1	NA	NA	NA	NA	NA	NA	NA	NA	NA	NA	NA	NA	NA
NA	TMCO1	NA	NA	NA	NA	NA	NA	NA	NA	NA	NA	NA	NA	NA
NA	TMED3	NA	NA	NA	NA	NA	NA	NA	NA	NA	NA	NA	NA	NA
NA	TMED4	NA	NA	NA	NA	NA	NA	NA	NA	NA	NA	NA	NA	NA
NA	TMEM102	NA	NA	NA	NA	NA	NA	NA	NA	NA	NA	NA	NA	NA
NA	TMEM106A	NA	NA	NA	NA	NA	NA	NA	NA	NA	NA	NA	NA	NA
NA	TMEM108	NA	NA	NA	NA	NA	NA	NA	NA	NA	NA	NA	NA	NA
NA	TMEM117	NA	NA	NA	NA	NA	NA	NA	NA	NA	NA	NA	NA	NA
NA	TMEM120A	NA	NA	NA	NA	NA	NA	NA	NA	NA	NA	NA	NA	NA
NA	TMEM127	NA	NA	NA	NA	NA	NA	NA	NA	NA	NA	NA	NA	NA
NA	TMEM129	NA	NA	NA	NA	NA	NA	NA	NA	NA	NA	NA	NA	NA
NA	TMEM131	NA	NA	NA	NA	NA	NA	NA	NA	NA	NA	NA	NA	NA
NA	TMEM134	NA	NA	NA	NA	NA	NA	NA	NA	NA	NA	NA	NA	NA
NA	TMEM136	NA	NA	NA	NA	NA	NA	NA	NA	NA	NA	NA	NA	NA
NA	TMEM150A	NA	NA	NA	NA	NA	NA	NA	NA	NA	NA	NA	NA	NA
NA	TMEM154	NA	NA	NA	NA	NA	NA	NA	NA	NA	NA	NA	NA	NA
NA	TMEM156	NA	NA	NA	NA	NA	NA	NA	NA	NA	NA	NA	NA	NA
NA	TMEM159	NA	NA	NA	NA	NA	NA	NA	NA	NA	NA	NA	NA	NA
NA	TMEM165	NA	NA	NA	NA	NA	NA	NA	NA	NA	NA	NA	NA	NA
NA	TMEM173	NA	NA	NA	NA	NA	NA	NA	NA	NA	NA	NA	NA	NA
NA	TMEM175	NA	NA	NA	NA	NA	NA	NA	NA	NA	NA	NA	NA	NA
NA	TMEM179B	NA	NA	NA	NA	NA	NA	NA	NA	NA	NA	NA	NA	NA
NA	TMEM181	NA	NA	NA	NA	NA	NA	NA	NA	NA	NA	NA	NA	NA
NA	TMEM187	NA	NA	NA	NA	NA	NA	NA	NA	NA	NA	NA	NA	NA
NA	TMEM200A	NA	NA	NA	NA	NA	NA	NA	NA	NA	NA	NA	NA	NA
NA	TMEM217	NA	NA	NA	NA	NA	NA	NA	NA	NA	NA	NA	NA	NA
NA	TMEM219	NA	NA	NA	NA	NA	NA	NA	NA	NA	NA	NA	NA	NA
NA	TMEM232	NA	NA	NA	NA	NA	NA	NA	NA	NA	NA	NA	NA	NA
NA	TMEM30A	NA	NA	NA	NA	NA	NA	NA	NA	NA	NA	NA	NA	NA
NA	TMEM41B	NA	NA	NA	NA	NA	NA	NA	NA	NA	NA	NA	NA	NA
NA	TMEM50A	NA	NA	NA	NA	NA	NA	NA	NA	NA	NA	NA	NA	NA
NA	TMEM59	NA	NA	NA	NA	NA	NA	NA	NA	NA	NA	NA	NA	NA
NA	TMEM63A	NA	NA	NA	NA	NA	NA	NA	NA	NA	NA	NA	NA	NA
NA	TMEM63B	NA	NA	NA	NA	NA	NA	NA	NA	NA	NA	NA	NA	NA
NA	TMEM86A	NA	NA	NA	NA	NA	NA	NA	NA	NA	NA	NA	NA	NA
NA	TMEM8A	NA	NA	NA	NA	NA	NA	NA	NA	NA	NA	NA	NA	NA
NA	TMEM95	NA	NA	NA	NA	NA	NA	NA	NA	NA	NA	NA	NA	NA
NA	TMEM9B	NA	NA	NA	NA	NA	NA	NA	NA	NA	NA	NA	NA	NA
NA	TMOD2	NA	NA	NA	NA	NA	NA	NA	NA	NA	NA	NA	NA	NA
NA	TMOD3	NA	NA	NA	NA	NA	NA	NA	NA	NA	NA	NA	NA	NA
NA	TNFAIP1	NA	NA	NA	NA	NA	NA	NA	NA	NA	NA	NA	NA	NA
NA	TNFAIP8L3	NA	NA	NA	NA	NA	NA	NA	NA	NA	NA	NA	NA	NA
NA	TNFRSF10A	NA	NA	NA	NA	NA	NA	NA	NA	NA	NA	NA	NA	NA
NA	TNFRSF10B	NA	NA	NA	NA	NA	NA	NA	NA	NA	NA	NA	NA	NA
NA	TNFRSF10D	NA	NA	NA	NA	NA	NA	NA	NA	NA	NA	NA	NA	NA
NA	TNFRSF13B	NA	NA	NA	NA	NA	NA	NA	NA	NA	NA	NA	NA	NA
NA	TNFRSF21	NA	NA	NA	NA	NA	NA	NA	NA	NA	NA	NA	NA	NA
NA	TNFSF10	NA	NA	NA	NA	NA	NA	NA	NA	NA	NA	NA	NA	NA
NA	TNFSF15	NA	NA	NA	NA	NA	NA	NA	NA	NA	NA	NA	NA	NA
NA	TNFSF18	NA	NA	NA	NA	NA	NA	NA	NA	NA	NA	NA	NA	NA
NA	TNFSF4	NA	NA	NA	NA	NA	NA	NA	NA	NA	NA	NA	NA	NA
NA	TNFSF9	NA	NA	NA	NA	NA	NA	NA	NA	NA	NA	NA	NA	NA
NA	TNIP1	NA	NA	NA	NA	NA	NA	NA	NA	NA	NA	NA	NA	NA
NA	TNNT2	NA	NA	NA	NA	NA	NA	NA	NA	NA	NA	NA	NA	NA
NA	TNP2	NA	NA	NA	NA	NA	NA	NA	NA	NA	NA	NA	NA	NA
NA	TNS1	NA	NA	NA	NA	NA	NA	NA	NA	NA	NA	NA	NA	NA
NA	TOB1	NA	NA	NA	NA	NA	NA	NA	NA	NA	NA	NA	NA	NA
NA	TOM1	NA	NA	NA	NA	NA	NA	NA	NA	NA	NA	NA	NA	NA
NA	TOM1L2	NA	NA	NA	NA	NA	NA	NA	NA	NA	NA	NA	NA	NA
NA	TOR1AIP2	NA	NA	NA	NA	NA	NA	NA	NA	NA	NA	NA	NA	NA
NA	TOR1B	NA	NA	NA	NA	NA	NA	NA	NA	NA	NA	NA	NA	NA
NA	TP53INP1	NA	NA	NA	NA	NA	NA	NA	NA	NA	NA	NA	NA	NA
NA	TP53INP2	NA	NA	NA	NA	NA	NA	NA	NA	NA	NA	NA	NA	NA
NA	TPBG	NA	NA	NA	NA	NA	NA	NA	NA	NA	NA	NA	NA	NA
NA	TPCN1	NA	NA	NA	NA	NA	NA	NA	NA	NA	NA	NA	NA	NA
NA	TPD52L1	NA	NA	NA	NA	NA	NA	NA	NA	NA	NA	NA	NA	NA
NA	TPD52L2	NA	NA	NA	NA	NA	NA	NA	NA	NA	NA	NA	NA	NA
NA	TPM1	NA	NA	NA	NA	NA	NA	NA	NA	NA	NA	NA	NA	NA
NA	TPRG1L	NA	NA	NA	NA	NA	NA	NA	NA	NA	NA	NA	NA	NA
NA	TRAF6	NA	NA	NA	NA	NA	NA	NA	NA	NA	NA	NA	NA	NA
NA	TRAK1	NA	NA	NA	NA	NA	NA	NA	NA	NA	NA	NA	NA	NA
NA	TRAK2	NA	NA	NA	NA	NA	NA	NA	NA	NA	NA	NA	NA	NA
NA	TRAM1	NA	NA	NA	NA	NA	NA	NA	NA	NA	NA	NA	NA	NA
NA	TREM1	NA	NA	NA	NA	NA	NA	NA	NA	NA	NA	NA	NA	NA
NA	TRIB2	NA	NA	NA	NA	NA	NA	NA	NA	NA	NA	NA	NA	NA
NA	TRIM22	NA	NA	NA	NA	NA	NA	NA	NA	NA	NA	NA	NA	NA
NA	TRIM32	NA	NA	NA	NA	NA	NA	NA	NA	NA	NA	NA	NA	NA
NA	TRIML2	NA	NA	NA	NA	NA	NA	NA	NA	NA	NA	NA	NA	NA
NA	TRPC1	NA	NA	NA	NA	NA	NA	NA	NA	NA	NA	NA	NA	NA
NA	TRPC4	NA	NA	NA	NA	NA	NA	NA	NA	NA	NA	NA	NA	NA
NA	TRPM4	NA	NA	NA	NA	NA	NA	NA	NA	NA	NA	NA	NA	NA
NA	TRPS1	NA	NA	NA	NA	NA	NA	NA	NA	NA	NA	NA	NA	NA
NA	TRPV2	NA	NA	NA	NA	NA	NA	NA	NA	NA	NA	NA	NA	NA
NA	TSC22D1	NA	NA	NA	NA	NA	NA	NA	NA	NA	NA	NA	NA	NA
NA	TSC22D3	NA	NA	NA	NA	NA	NA	NA	NA	NA	NA	NA	NA	NA
NA	TSEN34	NA	NA	NA	NA	NA	NA	NA	NA	NA	NA	NA	NA	NA
NA	TSGA10	NA	NA	NA	NA	NA	NA	NA	NA	NA	NA	NA	NA	NA
NA	TSPAN11	NA	NA	NA	NA	NA	NA	NA	NA	NA	NA	NA	NA	NA
NA	TSPAN13	NA	NA	NA	NA	NA	NA	NA	NA	NA	NA	NA	NA	NA
NA	TSPAN14	NA	NA	NA	NA	NA	NA	NA	NA	NA	NA	NA	NA	NA
NA	TSPAN4	NA	NA	NA	NA	NA	NA	NA	NA	NA	NA	NA	NA	NA
NA	TSPAN9	NA	NA	NA	NA	NA	NA	NA	NA	NA	NA	NA	NA	NA
NA	TSPYL1	NA	NA	NA	NA	NA	NA	NA	NA	NA	NA	NA	NA	NA
NA	TSPYL2	NA	NA	NA	NA	NA	NA	NA	NA	NA	NA	NA	NA	NA
NA	TSTA3	NA	NA	NA	NA	NA	NA	NA	NA	NA	NA	NA	NA	NA
NA	TTC13	NA	NA	NA	NA	NA	NA	NA	NA	NA	NA	NA	NA	NA
NA	TTC23L	NA	NA	NA	NA	NA	NA	NA	NA	NA	NA	NA	NA	NA
NA	TTC3	NA	NA	NA	NA	NA	NA	NA	NA	NA	NA	NA	NA	NA
NA	TTC36	NA	NA	NA	NA	NA	NA	NA	NA	NA	NA	NA	NA	NA
NA	TTC9	NA	NA	NA	NA	NA	NA	NA	NA	NA	NA	NA	NA	NA
NA	TUBA4A	NA	NA	NA	NA	NA	NA	NA	NA	NA	NA	NA	NA	NA
NA	TUBB2A	NA	NA	NA	NA	NA	NA	NA	NA	NA	NA	NA	NA	NA
NA	TUBG2	NA	NA	NA	NA	NA	NA	NA	NA	NA	NA	NA	NA	NA
NA	TUFT1	NA	NA	NA	NA	NA	NA	NA	NA	NA	NA	NA	NA	NA
NA	TUSC3	NA	NA	NA	NA	NA	NA	NA	NA	NA	NA	NA	NA	NA
NA	TXNDC11	NA	NA	NA	NA	NA	NA	NA	NA	NA	NA	NA	NA	NA
NA	TXNDC17	NA	NA	NA	NA	NA	NA	NA	NA	NA	NA	NA	NA	NA
NA	TYRP1	NA	NA	NA	NA	NA	NA	NA	NA	NA	NA	NA	NA	NA
NA	UACA	NA	NA	NA	NA	NA	NA	NA	NA	NA	NA	NA	NA	NA
NA	UBASH3B	NA	NA	NA	NA	NA	NA	NA	NA	NA	NA	NA	NA	NA
NA	UBE2B	NA	NA	NA	NA	NA	NA	NA	NA	NA	NA	NA	NA	NA
NA	UBE2E2	NA	NA	NA	NA	NA	NA	NA	NA	NA	NA	NA	NA	NA
NA	UBE2H	NA	NA	NA	NA	NA	NA	NA	NA	NA	NA	NA	NA	NA
NA	UBE2W	NA	NA	NA	NA	NA	NA	NA	NA	NA	NA	NA	NA	NA
NA	UBL3	NA	NA	NA	NA	NA	NA	NA	NA	NA	NA	NA	NA	NA
NA	UBTD1	NA	NA	NA	NA	NA	NA	NA	NA	NA	NA	NA	NA	NA
NA	UCHL1	NA	NA	NA	NA	NA	NA	NA	NA	NA	NA	NA	NA	NA
NA	UFM1	NA	NA	NA	NA	NA	NA	NA	NA	NA	NA	NA	NA	NA
NA	ULBP1	NA	NA	NA	NA	NA	NA	NA	NA	NA	NA	NA	NA	NA
NA	ULBP2	NA	NA	NA	NA	NA	NA	NA	NA	NA	NA	NA	NA	NA
NA	UNC119	NA	NA	NA	NA	NA	NA	NA	NA	NA	NA	NA	NA	NA
NA	UNC13A	NA	NA	NA	NA	NA	NA	NA	NA	NA	NA	NA	NA	NA
NA	UNC13B	NA	NA	NA	NA	NA	NA	NA	NA	NA	NA	NA	NA	NA
NA	UNC93B1	NA	NA	NA	NA	NA	NA	NA	NA	NA	NA	NA	NA	NA
NA	UQCR11	NA	NA	NA	NA	NA	NA	NA	NA	NA	NA	NA	NA	NA
NA	USP35	NA	NA	NA	NA	NA	NA	NA	NA	NA	NA	NA	NA	NA
NA	USP53	NA	NA	NA	NA	NA	NA	NA	NA	NA	NA	NA	NA	NA
NA	USP6	NA	NA	NA	NA	NA	NA	NA	NA	NA	NA	NA	NA	NA
NA	UST	NA	NA	NA	NA	NA	NA	NA	NA	NA	NA	NA	NA	NA
NA	UTS2R	NA	NA	NA	NA	NA	NA	NA	NA	NA	NA	NA	NA	NA
NA	VAMP2	NA	NA	NA	NA	NA	NA	NA	NA	NA	NA	NA	NA	NA
NA	VAMP3	NA	NA	NA	NA	NA	NA	NA	NA	NA	NA	NA	NA	NA
NA	VAT1	NA	NA	NA	NA	NA	NA	NA	NA	NA	NA	NA	NA	NA
NA	VCPIP1	NA	NA	NA	NA	NA	NA	NA	NA	NA	NA	NA	NA	NA
NA	VDAC2	NA	NA	NA	NA	NA	NA	NA	NA	NA	NA	NA	NA	NA
NA	VGLL3	NA	NA	NA	NA	NA	NA	NA	NA	NA	NA	NA	NA	NA
NA	VKORC1	NA	NA	NA	NA	NA	NA	NA	NA	NA	NA	NA	NA	NA
NA	VLDLR	NA	NA	NA	NA	NA	NA	NA	NA	NA	NA	NA	NA	NA
NA	VN1R1	NA	NA	NA	NA	NA	NA	NA	NA	NA	NA	NA	NA	NA
NA	VNN1	NA	NA	NA	NA	NA	NA	NA	NA	NA	NA	NA	NA	NA
NA	VWCE	NA	NA	NA	NA	NA	NA	NA	NA	NA	NA	NA	NA	NA
NA	WDR26	NA	NA	NA	NA	NA	NA	NA	NA	NA	NA	NA	NA	NA
NA	WDR41	NA	NA	NA	NA	NA	NA	NA	NA	NA	NA	NA	NA	NA
NA	WDR44	NA	NA	NA	NA	NA	NA	NA	NA	NA	NA	NA	NA	NA
NA	WDR45	NA	NA	NA	NA	NA	NA	NA	NA	NA	NA	NA	NA	NA
NA	WDR60	NA	NA	NA	NA	NA	NA	NA	NA	NA	NA	NA	NA	NA
NA	WDR63	NA	NA	NA	NA	NA	NA	NA	NA	NA	NA	NA	NA	NA
NA	WDR66	NA	NA	NA	NA	NA	NA	NA	NA	NA	NA	NA	NA	NA
NA	WDR78	NA	NA	NA	NA	NA	NA	NA	NA	NA	NA	NA	NA	NA
NA	WIPI1	NA	NA	NA	NA	NA	NA	NA	NA	NA	NA	NA	NA	NA
NA	WIPI2	NA	NA	NA	NA	NA	NA	NA	NA	NA	NA	NA	NA	NA
NA	WLS	NA	NA	NA	NA	NA	NA	NA	NA	NA	NA	NA	NA	NA
NA	WNK1	NA	NA	NA	NA	NA	NA	NA	NA	NA	NA	NA	NA	NA
NA	WNT16	NA	NA	NA	NA	NA	NA	NA	NA	NA	NA	NA	NA	NA
NA	WNT5A	NA	NA	NA	NA	NA	NA	NA	NA	NA	NA	NA	NA	NA
NA	WNT5B	NA	NA	NA	NA	NA	NA	NA	NA	NA	NA	NA	NA	NA
NA	WNT9B	NA	NA	NA	NA	NA	NA	NA	NA	NA	NA	NA	NA	NA
NA	WRB	NA	NA	NA	NA	NA	NA	NA	NA	NA	NA	NA	NA	NA
NA	WSB1	NA	NA	NA	NA	NA	NA	NA	NA	NA	NA	NA	NA	NA
NA	XDH	NA	NA	NA	NA	NA	NA	NA	NA	NA	NA	NA	NA	NA
NA	XRCC4	NA	NA	NA	NA	NA	NA	NA	NA	NA	NA	NA	NA	NA
NA	XYLT1	NA	NA	NA	NA	NA	NA	NA	NA	NA	NA	NA	NA	NA
NA	XYLT2	NA	NA	NA	NA	NA	NA	NA	NA	NA	NA	NA	NA	NA
NA	YIF1B	NA	NA	NA	NA	NA	NA	NA	NA	NA	NA	NA	NA	NA
NA	YIPF5	NA	NA	NA	NA	NA	NA	NA	NA	NA	NA	NA	NA	NA
NA	YPEL2	NA	NA	NA	NA	NA	NA	NA	NA	NA	NA	NA	NA	NA
NA	YPEL3	NA	NA	NA	NA	NA	NA	NA	NA	NA	NA	NA	NA	NA
NA	YPEL5	NA	NA	NA	NA	NA	NA	NA	NA	NA	NA	NA	NA	NA
NA	ZBTB4	NA	NA	NA	NA	NA	NA	NA	NA	NA	NA	NA	NA	NA
NA	ZBTB46	NA	NA	NA	NA	NA	NA	NA	NA	NA	NA	NA	NA	NA
NA	ZBTB47	NA	NA	NA	NA	NA	NA	NA	NA	NA	NA	NA	NA	NA
NA	ZBTB7B	NA	NA	NA	NA	NA	NA	NA	NA	NA	NA	NA	NA	NA
NA	ZC3H12B	NA	NA	NA	NA	NA	NA	NA	NA	NA	NA	NA	NA	NA
NA	ZDBF2	NA	NA	NA	NA	NA	NA	NA	NA	NA	NA	NA	NA	NA
NA	ZDHHC1	NA	NA	NA	NA	NA	NA	NA	NA	NA	NA	NA	NA	NA
NA	ZDHHC14	NA	NA	NA	NA	NA	NA	NA	NA	NA	NA	NA	NA	NA
NA	ZDHHC23	NA	NA	NA	NA	NA	NA	NA	NA	NA	NA	NA	NA	NA
NA	ZDHHC24	NA	NA	NA	NA	NA	NA	NA	NA	NA	NA	NA	NA	NA
NA	ZDHHC9	NA	NA	NA	NA	NA	NA	NA	NA	NA	NA	NA	NA	NA
NA	ZER1	NA	NA	NA	NA	NA	NA	NA	NA	NA	NA	NA	NA	NA
NA	ZFAND2A	NA	NA	NA	NA	NA	NA	NA	NA	NA	NA	NA	NA	NA
NA	ZFAND3	NA	NA	NA	NA	NA	NA	NA	NA	NA	NA	NA	NA	NA
NA	ZFHX2	NA	NA	NA	NA	NA	NA	NA	NA	NA	NA	NA	NA	NA
NA	ZFHX3	NA	NA	NA	NA	NA	NA	NA	NA	NA	NA	NA	NA	NA
NA	ZFP28	NA	NA	NA	NA	NA	NA	NA	NA	NA	NA	NA	NA	NA
NA	ZG16B	NA	NA	NA	NA	NA	NA	NA	NA	NA	NA	NA	NA	NA
NA	ZHX3	NA	NA	NA	NA	NA	NA	NA	NA	NA	NA	NA	NA	NA
NA	ZMAT3	NA	NA	NA	NA	NA	NA	NA	NA	NA	NA	NA	NA	NA
NA	ZNF175	NA	NA	NA	NA	NA	NA	NA	NA	NA	NA	NA	NA	NA
NA	ZNF219	NA	NA	NA	NA	NA	NA	NA	NA	NA	NA	NA	NA	NA
NA	ZNF264	NA	NA	NA	NA	NA	NA	NA	NA	NA	NA	NA	NA	NA
NA	ZNF391	NA	NA	NA	NA	NA	NA	NA	NA	NA	NA	NA	NA	NA
NA	ZNF425	NA	NA	NA	NA	NA	NA	NA	NA	NA	NA	NA	NA	NA
NA	ZNF432	NA	NA	NA	NA	NA	NA	NA	NA	NA	NA	NA	NA	NA
NA	ZNF517	NA	NA	NA	NA	NA	NA	NA	NA	NA	NA	NA	NA	NA
NA	ZNF528	NA	NA	NA	NA	NA	NA	NA	NA	NA	NA	NA	NA	NA
NA	ZNF582	NA	NA	NA	NA	NA	NA	NA	NA	NA	NA	NA	NA	NA
NA	ZNF583	NA	NA	NA	NA	NA	NA	NA	NA	NA	NA	NA	NA	NA
NA	ZNF610	NA	NA	NA	NA	NA	NA	NA	NA	NA	NA	NA	NA	NA
NA	ZNF622	NA	NA	NA	NA	NA	NA	NA	NA	NA	NA	NA	NA	NA
NA	ZNF654	NA	NA	NA	NA	NA	NA	NA	NA	NA	NA	NA	NA	NA
NA	ZNF69	NA	NA	NA	NA	NA	NA	NA	NA	NA	NA	NA	NA	NA
NA	ZNF763	NA	NA	NA	NA	NA	NA	NA	NA	NA	NA	NA	NA	NA
NA	ZNFX1	NA	NA	NA	NA	NA	NA	NA	NA	NA	NA	NA	NA	NA
NA	ZP1	NA	NA	NA	NA	NA	NA	NA	NA	NA	NA	NA	NA	NA
NA	ZP2	NA	NA	NA	NA	NA	NA	NA	NA	NA	NA	NA	NA	NA
NA	ZPLD1	NA	NA	NA	NA	NA	NA	NA	NA	NA	NA	NA	NA	NA

## Sheet: GSE59861_6h_GSE55118
X1_sets_GSE55118_middle_vs_young	X1_sets_GSE55118_old_vs_young	X1_sets_GSE59861_6h_2Gy	X1_sets_GSE59861_6h_5cGy	X2_sets_GSE55118_middle_vs_young_GSE55118_old_vs_young	X2_sets_GSE55118_middle_vs_young_GSE59861_6h_2Gy	X2_sets_GSE55118_middle_vs_young_GSE59861_6h_5cGy	X2_sets_GSE55118_old_vs_young_GSE59861_6h_2Gy	X2_sets_GSE55118_old_vs_young_GSE59861_6h_5cGy	X2_sets_GSE59861_6h_2Gy_GSE59861_6h_5cGy	X3_sets_GSE55118_middle_vs_young_GSE55118_old_vs_young_GSE59861_6h_2Gy	X3_sets_GSE55118_middle_vs_young_GSE55118_old_vs_young_GSE59861_6h_5cGy	X3_sets_GSE55118_middle_vs_young_GSE59861_6h_2Gy_GSE59861_6h_5cGy	X3_sets_GSE55118_old_vs_young_GSE59861_6h_2Gy_GSE59861_6h_5cGy	X4_sets_GSE55118_middle_vs_young_GSE55118_old_vs_young_GSE59861_6h_2Gy_GSE59861_6h_5cGy
ABCB10	ABCG5	ACOT8	ABLIM1	ABHD13	KLK3	NA	NA	DLL1	C12ORF65	NA	NA	NA	NA	NA
ABCE1	ABHD13	ARHGEF3	ADAM12	ANKRD33	PHLDA1	NA	NA	TRAF1	CHAC1	NA	NA	NA	NA	NA
ABHD13	ABHD3	BCL2L1	AKT2	ANP32C	SUSD5	NA	NA	NA	DDIT3	NA	NA	NA	NA	NA
ABHD5	ACBD5	BLOC1S2	APCDD1	APIP	NA	NA	NA	NA	DDIT4	NA	NA	NA	NA	NA
ACADM	ACOT12	C12ORF65	BCDIN3D	AQP8	NA	NA	NA	NA	KCNE4	NA	NA	NA	NA	NA
ACER2	ACTN3	C21ORF91	BCL2L11	ATP2B3	NA	NA	NA	NA	PLXNB2	NA	NA	NA	NA	NA
ACTR3C	ACTR3	CDCA3	BDKRB2	C8ORF58	NA	NA	NA	NA	RRAGC	NA	NA	NA	NA	NA
ACTRT2	ADAM9	CDKN1A	C12ORF65	CD300A	NA	NA	NA	NA	SESN2	NA	NA	NA	NA	NA
AGXT	AFMID	CHAC1	C1ORF74	CHST4	NA	NA	NA	NA	SPATA2	NA	NA	NA	NA	NA
AIF1L	ALAS2	CLPX	CCDC96	CLDN16	NA	NA	NA	NA	STC2	NA	NA	NA	NA	NA
AJAP1	ALDOB	CPSF6	CH25H	CRYGD	NA	NA	NA	NA	ZNF425	NA	NA	NA	NA	NA
ALOX15B	AMN1	DDC	CHAC1	DBF4B	NA	NA	NA	NA	ZNF773	NA	NA	NA	NA	NA
ALS2CL	ANKRD12	DDIT3	DCP1B	EFNA1	NA	NA	NA	NA	NA	NA	NA	NA	NA	NA
AMPD3	ANKRD33	DDIT4	DDIT3	FAM81A	NA	NA	NA	NA	NA	NA	NA	NA	NA	NA
ANKRD33	ANP32C	E2F7	DDIT4	FAM83E	NA	NA	NA	NA	NA	NA	NA	NA	NA	NA
ANO10	APIP	EBF3	DLL1	FOLR2	NA	NA	NA	NA	NA	NA	NA	NA	NA	NA
ANP32C	AQP8	EDA2R	DNAI1	GABRA3	NA	NA	NA	NA	NA	NA	NA	NA	NA	NA
AP1M2	ARGLU1	ERC1	EGFR	GBGT1	NA	NA	NA	NA	NA	NA	NA	NA	NA	NA
APIP	ART3	FAS	HECTD2	GNG8	NA	NA	NA	NA	NA	NA	NA	NA	NA	NA
AQP8	ATF3	FRMD4A	IP6K1	H1FOO	NA	NA	NA	NA	NA	NA	NA	NA	NA	NA
ARHGAP33	ATMIN	GDF15	ISL2	HCRTR1	NA	NA	NA	NA	NA	NA	NA	NA	NA	NA
ARL6IP6	ATP2B3	GDF5	KCNE4	HERC3	NA	NA	NA	NA	NA	NA	NA	NA	NA	NA
ASTL	ATXN10	HAS3	MAF	IL18BP	NA	NA	NA	NA	NA	NA	NA	NA	NA	NA
ATP2B3	AZI2	HKR1	MAVS	JAK3	NA	NA	NA	NA	NA	NA	NA	NA	NA	NA
ATP8B3	BLNK	HMGA2	MBP	KIAA0040	NA	NA	NA	NA	NA	NA	NA	NA	NA	NA
ATXN1	BPNT1	HSPA14	MTMR3	KRTAP3-1	NA	NA	NA	NA	NA	NA	NA	NA	NA	NA
BBS7	BRSK2	KCNE4	NIT1	LCE3C	NA	NA	NA	NA	NA	NA	NA	NA	NA	NA
BCOR	BRWD1	KLK3	NSD1	LCNL1	NA	NA	NA	NA	NA	NA	NA	NA	NA	NA
BHLHE23	C1ORF127	KRT17	OLFML2B	LONRF3	NA	NA	NA	NA	NA	NA	NA	NA	NA	NA
C10ORF120	C1ORF194	LCA5L	PCID2	LRRC27	NA	NA	NA	NA	NA	NA	NA	NA	NA	NA
C16ORF71	C1QTNF6	MALAT1	PLXNB2	MFNG	NA	NA	NA	NA	NA	NA	NA	NA	NA	NA
C1ORF189	C7	MAN2C1	PRDM1	MTMR14	NA	NA	NA	NA	NA	NA	NA	NA	NA	NA
C8ORF58	C8ORF58	MDM2	RAD54L2	MUSK	NA	NA	NA	NA	NA	NA	NA	NA	NA	NA
C9ORF40	CACNA1I	NIPAL2	RAPGEF6	MYEOV	NA	NA	NA	NA	NA	NA	NA	NA	NA	NA
CALML4	CAMSAP1	OR5AU1	RCOR3	OR7C2	NA	NA	NA	NA	NA	NA	NA	NA	NA	NA
CANX	CCDC34	OSBPL3	RIPK4	OTUD6A	NA	NA	NA	NA	NA	NA	NA	NA	NA	NA
CAPZA2	CCL18	PAG1	RRAGC	PACRGL	NA	NA	NA	NA	NA	NA	NA	NA	NA	NA
CAV3	CCL7	PALMD	SESN2	PAX7	NA	NA	NA	NA	NA	NA	NA	NA	NA	NA
CCDC58	CCR1	PCNA	SHC3	PKLR	NA	NA	NA	NA	NA	NA	NA	NA	NA	NA
CCDC82	CD300A	PHLDA1	SNHG12	PPP6R2	NA	NA	NA	NA	NA	NA	NA	NA	NA	NA
CCT5	CD300E	PITPNM2	SOX4	PRSS22	NA	NA	NA	NA	NA	NA	NA	NA	NA	NA
CD163	CDH13	PLXNB2	SPATA2	PTPN6	NA	NA	NA	NA	NA	NA	NA	NA	NA	NA
CD300A	CGRRF1	POLH	STC2	RETN	NA	NA	NA	NA	NA	NA	NA	NA	NA	NA
CD8B	CHIT1	POU2F2	TAOK2	SLC14A2	NA	NA	NA	NA	NA	NA	NA	NA	NA	NA
CDH3	CHST4	PPM1D	TMEM177	SLC23A3	NA	NA	NA	NA	NA	NA	NA	NA	NA	NA
CDK10	CISD1	PSTPIP2	TRAF1	SLC30A3	NA	NA	NA	NA	NA	NA	NA	NA	NA	NA
CDR1	CLDN16	RPP38	TXLNG	SLC32A1	NA	NA	NA	NA	NA	NA	NA	NA	NA	NA
CHRNB3	CLDN6	RPS27A	UBTF	SLC6A5	NA	NA	NA	NA	NA	NA	NA	NA	NA	NA
CHST4	CLDND2	RRAGC	ZBTB7A	SNRPD2P2	NA	NA	NA	NA	NA	NA	NA	NA	NA	NA
CLCN1	CMPK2	SDHA	ZCCHC14	ST8SIA3	NA	NA	NA	NA	NA	NA	NA	NA	NA	NA
CLDN16	CNGB1	SESN1	ZMIZ1	TFAM	NA	NA	NA	NA	NA	NA	NA	NA	NA	NA
CLDN3	COL11A2	SESN2	ZNF232	TTLL9	NA	NA	NA	NA	NA	NA	NA	NA	NA	NA
COMMD6	COL19A1	SLC25A23	ZNF275	VPREB3	NA	NA	NA	NA	NA	NA	NA	NA	NA	NA
CRYGD	COL4A4	SPATA19	ZNF425	VWA2	NA	NA	NA	NA	NA	NA	NA	NA	NA	NA
CXCL5	COLEC11	SPATA2	ZNF549	WDFY4	NA	NA	NA	NA	NA	NA	NA	NA	NA	NA
DBF4B	COX6B2	SSH2	ZNF585A	WDR38	NA	NA	NA	NA	NA	NA	NA	NA	NA	NA
DCAF12L2	CPLX2	STC2	ZNF773	WNT1	NA	NA	NA	NA	NA	NA	NA	NA	NA	NA
DEFB129	CRYGD	STOM	ZNF785	WNT4	NA	NA	NA	NA	NA	NA	NA	NA	NA	NA
DEK	CSMD1	SUSD5	NA	ZC3H12D	NA	NA	NA	NA	NA	NA	NA	NA	NA	NA
DNA2	CTSS	TMEM217	NA	ZIC4	NA	NA	NA	NA	NA	NA	NA	NA	NA	NA
DPRX	CYP19A1	TNFRSF10B	NA	ZNF560	NA	NA	NA	NA	NA	NA	NA	NA	NA	NA
EFNA1	D2HGDH	TNFRSF10D	NA	ZSCAN1	NA	NA	NA	NA	NA	NA	NA	NA	NA	NA
EIF2AK3	DBF4B	TOMM40L	NA	NA	NA	NA	NA	NA	NA	NA	NA	NA	NA	NA
ERI2	DBI	TP53INP1	NA	NA	NA	NA	NA	NA	NA	NA	NA	NA	NA	NA
FAM120C	DDX27	TRIAP1	NA	NA	NA	NA	NA	NA	NA	NA	NA	NA	NA	NA
FAM124A	DDX58	TRIM4	NA	NA	NA	NA	NA	NA	NA	NA	NA	NA	NA	NA
FAM3C	DENND4C	TSPAN32	NA	NA	NA	NA	NA	NA	NA	NA	NA	NA	NA	NA
FAM81A	DISP2	UBE3C	NA	NA	NA	NA	NA	NA	NA	NA	NA	NA	NA	NA
FAM83E	DLK1	VPS29	NA	NA	NA	NA	NA	NA	NA	NA	NA	NA	NA	NA
FCN3	DLL1	WDR33	NA	NA	NA	NA	NA	NA	NA	NA	NA	NA	NA	NA
FER1L5	DNAH14	WDR66	NA	NA	NA	NA	NA	NA	NA	NA	NA	NA	NA	NA
FEZ2	DNASE1L2	ZMAT3	NA	NA	NA	NA	NA	NA	NA	NA	NA	NA	NA	NA
FGF1	DNM3	ZNF337	NA	NA	NA	NA	NA	NA	NA	NA	NA	NA	NA	NA
FGFR3	DTWD1	ZNF419	NA	NA	NA	NA	NA	NA	NA	NA	NA	NA	NA	NA
FMN2	EBP	ZNF425	NA	NA	NA	NA	NA	NA	NA	NA	NA	NA	NA	NA
FOLR2	ECEL1	ZNF77	NA	NA	NA	NA	NA	NA	NA	NA	NA	NA	NA	NA
FOXD1	EFCAB6	ZNF773	NA	NA	NA	NA	NA	NA	NA	NA	NA	NA	NA	NA
FRMD3	EFNA1	ZRSR2	NA	NA	NA	NA	NA	NA	NA	NA	NA	NA	NA	NA
GABRA3	ENHO	NA	NA	NA	NA	NA	NA	NA	NA	NA	NA	NA	NA	NA
GBGT1	EPPK1	NA	NA	NA	NA	NA	NA	NA	NA	NA	NA	NA	NA	NA
GLB1L3	ESCO1	NA	NA	NA	NA	NA	NA	NA	NA	NA	NA	NA	NA	NA
GNG8	ESRP1	NA	NA	NA	NA	NA	NA	NA	NA	NA	NA	NA	NA	NA
GNL2	FAM184A	NA	NA	NA	NA	NA	NA	NA	NA	NA	NA	NA	NA	NA
GPR137C	FAM81A	NA	NA	NA	NA	NA	NA	NA	NA	NA	NA	NA	NA	NA
GPSM3	FAM83E	NA	NA	NA	NA	NA	NA	NA	NA	NA	NA	NA	NA	NA
H1FOO	FFAR2	NA	NA	NA	NA	NA	NA	NA	NA	NA	NA	NA	NA	NA
H2AFV	FIBCD1	NA	NA	NA	NA	NA	NA	NA	NA	NA	NA	NA	NA	NA
HAUS6	FKTN	NA	NA	NA	NA	NA	NA	NA	NA	NA	NA	NA	NA	NA
HCRTR1	FOLR2	NA	NA	NA	NA	NA	NA	NA	NA	NA	NA	NA	NA	NA
HERC3	FRS3	NA	NA	NA	NA	NA	NA	NA	NA	NA	NA	NA	NA	NA
HES6	FTHL17	NA	NA	NA	NA	NA	NA	NA	NA	NA	NA	NA	NA	NA
HIP1R	FTMT	NA	NA	NA	NA	NA	NA	NA	NA	NA	NA	NA	NA	NA
HMGB2	GABRA3	NA	NA	NA	NA	NA	NA	NA	NA	NA	NA	NA	NA	NA
HNF1B	GAL	NA	NA	NA	NA	NA	NA	NA	NA	NA	NA	NA	NA	NA
HSPH1	GBGT1	NA	NA	NA	NA	NA	NA	NA	NA	NA	NA	NA	NA	NA
IL18BP	GCNT2	NA	NA	NA	NA	NA	NA	NA	NA	NA	NA	NA	NA	NA
JAK3	GLDN	NA	NA	NA	NA	NA	NA	NA	NA	NA	NA	NA	NA	NA
JARID2	GNG8	NA	NA	NA	NA	NA	NA	NA	NA	NA	NA	NA	NA	NA
KIAA0040	GPC3	NA	NA	NA	NA	NA	NA	NA	NA	NA	NA	NA	NA	NA
KIAA0232	GPR15	NA	NA	NA	NA	NA	NA	NA	NA	NA	NA	NA	NA	NA
KIAA1324L	GPR17	NA	NA	NA	NA	NA	NA	NA	NA	NA	NA	NA	NA	NA
KIF1C	GPR50	NA	NA	NA	NA	NA	NA	NA	NA	NA	NA	NA	NA	NA
KIF21A	GRHL2	NA	NA	NA	NA	NA	NA	NA	NA	NA	NA	NA	NA	NA
KIF21B	GRIN2C	NA	NA	NA	NA	NA	NA	NA	NA	NA	NA	NA	NA	NA
KLF16	GSG1	NA	NA	NA	NA	NA	NA	NA	NA	NA	NA	NA	NA	NA
KLF5	H1FOO	NA	NA	NA	NA	NA	NA	NA	NA	NA	NA	NA	NA	NA
KLK3	HCRTR1	NA	NA	NA	NA	NA	NA	NA	NA	NA	NA	NA	NA	NA
KRT32	HERC3	NA	NA	NA	NA	NA	NA	NA	NA	NA	NA	NA	NA	NA
KRTAP10-10	HEXB	NA	NA	NA	NA	NA	NA	NA	NA	NA	NA	NA	NA	NA
KRTAP10-9	HLA-DOA	NA	NA	NA	NA	NA	NA	NA	NA	NA	NA	NA	NA	NA
KRTAP3-1	HLA-DPB2	NA	NA	NA	NA	NA	NA	NA	NA	NA	NA	NA	NA	NA
LCE3B	HLA-DQB1	NA	NA	NA	NA	NA	NA	NA	NA	NA	NA	NA	NA	NA
LCE3C	HSPA6	NA	NA	NA	NA	NA	NA	NA	NA	NA	NA	NA	NA	NA
LCE3D	HSPB7	NA	NA	NA	NA	NA	NA	NA	NA	NA	NA	NA	NA	NA
LCK	IFI16	NA	NA	NA	NA	NA	NA	NA	NA	NA	NA	NA	NA	NA
LCNL1	IGFL3	NA	NA	NA	NA	NA	NA	NA	NA	NA	NA	NA	NA	NA
LENG8	IL18BP	NA	NA	NA	NA	NA	NA	NA	NA	NA	NA	NA	NA	NA
LMNB1	INTS8	NA	NA	NA	NA	NA	NA	NA	NA	NA	NA	NA	NA	NA
LMO1	ITIH1	NA	NA	NA	NA	NA	NA	NA	NA	NA	NA	NA	NA	NA
LONRF3	JAK3	NA	NA	NA	NA	NA	NA	NA	NA	NA	NA	NA	NA	NA
LRRC27	JKAMP	NA	NA	NA	NA	NA	NA	NA	NA	NA	NA	NA	NA	NA
LRRC42	KCNV1	NA	NA	NA	NA	NA	NA	NA	NA	NA	NA	NA	NA	NA
LTA	KIAA0040	NA	NA	NA	NA	NA	NA	NA	NA	NA	NA	NA	NA	NA
LY86	KIAA1958	NA	NA	NA	NA	NA	NA	NA	NA	NA	NA	NA	NA	NA
LYPLA1	KIR3DX1	NA	NA	NA	NA	NA	NA	NA	NA	NA	NA	NA	NA	NA
LYSMD3	KISS1	NA	NA	NA	NA	NA	NA	NA	NA	NA	NA	NA	NA	NA
MAPK12	KLC2	NA	NA	NA	NA	NA	NA	NA	NA	NA	NA	NA	NA	NA
MARK1	KLF15	NA	NA	NA	NA	NA	NA	NA	NA	NA	NA	NA	NA	NA
MBOAT1	KRT31	NA	NA	NA	NA	NA	NA	NA	NA	NA	NA	NA	NA	NA
MDGA2	KRTAP3-1	NA	NA	NA	NA	NA	NA	NA	NA	NA	NA	NA	NA	NA
MERTK	KRTAP5-10	NA	NA	NA	NA	NA	NA	NA	NA	NA	NA	NA	NA	NA
MFNG	KRTAP5-2	NA	NA	NA	NA	NA	NA	NA	NA	NA	NA	NA	NA	NA
MFSD6	KRTAP5-5	NA	NA	NA	NA	NA	NA	NA	NA	NA	NA	NA	NA	NA
MPRIP	KRTAP6-2	NA	NA	NA	NA	NA	NA	NA	NA	NA	NA	NA	NA	NA
MRS2	LARP7	NA	NA	NA	NA	NA	NA	NA	NA	NA	NA	NA	NA	NA
MTHFD2L	LCE1B	NA	NA	NA	NA	NA	NA	NA	NA	NA	NA	NA	NA	NA
MTMR14	LCE3C	NA	NA	NA	NA	NA	NA	NA	NA	NA	NA	NA	NA	NA
MUSK	LCNL1	NA	NA	NA	NA	NA	NA	NA	NA	NA	NA	NA	NA	NA
MYADML2	LIAS	NA	NA	NA	NA	NA	NA	NA	NA	NA	NA	NA	NA	NA
MYEOV	LIG4	NA	NA	NA	NA	NA	NA	NA	NA	NA	NA	NA	NA	NA
NETO1	LIPM	NA	NA	NA	NA	NA	NA	NA	NA	NA	NA	NA	NA	NA
NQO1	LONRF3	NA	NA	NA	NA	NA	NA	NA	NA	NA	NA	NA	NA	NA
NRIP3	LRG1	NA	NA	NA	NA	NA	NA	NA	NA	NA	NA	NA	NA	NA
NUPL2	LRRC27	NA	NA	NA	NA	NA	NA	NA	NA	NA	NA	NA	NA	NA
OLFM1	LRTM1	NA	NA	NA	NA	NA	NA	NA	NA	NA	NA	NA	NA	NA
OPN3	MALT1	NA	NA	NA	NA	NA	NA	NA	NA	NA	NA	NA	NA	NA
OR10C1	MAP3K13	NA	NA	NA	NA	NA	NA	NA	NA	NA	NA	NA	NA	NA
OR3A3	MATN3	NA	NA	NA	NA	NA	NA	NA	NA	NA	NA	NA	NA	NA
OR4D11	MCF2L	NA	NA	NA	NA	NA	NA	NA	NA	NA	NA	NA	NA	NA
OR7C2	MED22	NA	NA	NA	NA	NA	NA	NA	NA	NA	NA	NA	NA	NA
OTUD6A	MFNG	NA	NA	NA	NA	NA	NA	NA	NA	NA	NA	NA	NA	NA
OXSR1	MLANA	NA	NA	NA	NA	NA	NA	NA	NA	NA	NA	NA	NA	NA
PACRGL	MMP25	NA	NA	NA	NA	NA	NA	NA	NA	NA	NA	NA	NA	NA
PARP1	MRAP	NA	NA	NA	NA	NA	NA	NA	NA	NA	NA	NA	NA	NA
PAX7	MSX2	NA	NA	NA	NA	NA	NA	NA	NA	NA	NA	NA	NA	NA
PAXIP1	MTMR14	NA	NA	NA	NA	NA	NA	NA	NA	NA	NA	NA	NA	NA
PCDH1	MUC2	NA	NA	NA	NA	NA	NA	NA	NA	NA	NA	NA	NA	NA
PCDHB13	MUSK	NA	NA	NA	NA	NA	NA	NA	NA	NA	NA	NA	NA	NA
PCMT1	MYEOV	NA	NA	NA	NA	NA	NA	NA	NA	NA	NA	NA	NA	NA
PER3	NCK1	NA	NA	NA	NA	NA	NA	NA	NA	NA	NA	NA	NA	NA
PHLDA1	NDOR1	NA	NA	NA	NA	NA	NA	NA	NA	NA	NA	NA	NA	NA
PHLDB2	NDUFA10	NA	NA	NA	NA	NA	NA	NA	NA	NA	NA	NA	NA	NA
PI4K2B	NHSL2	NA	NA	NA	NA	NA	NA	NA	NA	NA	NA	NA	NA	NA
PIGW	NIPSNAP3B	NA	NA	NA	NA	NA	NA	NA	NA	NA	NA	NA	NA	NA
PKLR	NOVA2	NA	NA	NA	NA	NA	NA	NA	NA	NA	NA	NA	NA	NA
PLK2	NPFFR1	NA	NA	NA	NA	NA	NA	NA	NA	NA	NA	NA	NA	NA
PLLP	NTNG1	NA	NA	NA	NA	NA	NA	NA	NA	NA	NA	NA	NA	NA
PODXL	OR10G8	NA	NA	NA	NA	NA	NA	NA	NA	NA	NA	NA	NA	NA
POLD3	OR10H1	NA	NA	NA	NA	NA	NA	NA	NA	NA	NA	NA	NA	NA
PPAT	OR1E1	NA	NA	NA	NA	NA	NA	NA	NA	NA	NA	NA	NA	NA
PPP4R1L	OR51B6	NA	NA	NA	NA	NA	NA	NA	NA	NA	NA	NA	NA	NA
PPP6R2	OR5A1	NA	NA	NA	NA	NA	NA	NA	NA	NA	NA	NA	NA	NA
PRPS2	OR7C1	NA	NA	NA	NA	NA	NA	NA	NA	NA	NA	NA	NA	NA
PRSS22	OR7C2	NA	NA	NA	NA	NA	NA	NA	NA	NA	NA	NA	NA	NA
PTGES3	ORMDL1	NA	NA	NA	NA	NA	NA	NA	NA	NA	NA	NA	NA	NA
PTMA	OTOP2	NA	NA	NA	NA	NA	NA	NA	NA	NA	NA	NA	NA	NA
PTPN3	OTP	NA	NA	NA	NA	NA	NA	NA	NA	NA	NA	NA	NA	NA
PTPN6	OTUD6A	NA	NA	NA	NA	NA	NA	NA	NA	NA	NA	NA	NA	NA
RAB18	PABPC3	NA	NA	NA	NA	NA	NA	NA	NA	NA	NA	NA	NA	NA
RAMP3	PACRGL	NA	NA	NA	NA	NA	NA	NA	NA	NA	NA	NA	NA	NA
RASA2	PATE1	NA	NA	NA	NA	NA	NA	NA	NA	NA	NA	NA	NA	NA
RAVER1	PAX7	NA	NA	NA	NA	NA	NA	NA	NA	NA	NA	NA	NA	NA
RBM6	PBX1	NA	NA	NA	NA	NA	NA	NA	NA	NA	NA	NA	NA	NA
RCC2	PCGF3	NA	NA	NA	NA	NA	NA	NA	NA	NA	NA	NA	NA	NA
RETN	PFDN4	NA	NA	NA	NA	NA	NA	NA	NA	NA	NA	NA	NA	NA
RFWD3	PGC	NA	NA	NA	NA	NA	NA	NA	NA	NA	NA	NA	NA	NA
RGL3	PGLYRP2	NA	NA	NA	NA	NA	NA	NA	NA	NA	NA	NA	NA	NA
RHOA	PGR	NA	NA	NA	NA	NA	NA	NA	NA	NA	NA	NA	NA	NA
RPL13P5	PKLR	NA	NA	NA	NA	NA	NA	NA	NA	NA	NA	NA	NA	NA
RRN3	PLSCR1	NA	NA	NA	NA	NA	NA	NA	NA	NA	NA	NA	NA	NA
SACM1L	PLXNA4	NA	NA	NA	NA	NA	NA	NA	NA	NA	NA	NA	NA	NA
SCGB3A1	POM121L12	NA	NA	NA	NA	NA	NA	NA	NA	NA	NA	NA	NA	NA
SCOC	PPP1R16B	NA	NA	NA	NA	NA	NA	NA	NA	NA	NA	NA	NA	NA
SERAC1	PPP6R2	NA	NA	NA	NA	NA	NA	NA	NA	NA	NA	NA	NA	NA
SFI1	PRKAA2	NA	NA	NA	NA	NA	NA	NA	NA	NA	NA	NA	NA	NA
SFMBT1	PRKY	NA	NA	NA	NA	NA	NA	NA	NA	NA	NA	NA	NA	NA
SHISA7	PROM2	NA	NA	NA	NA	NA	NA	NA	NA	NA	NA	NA	NA	NA
SLC14A2	PRRG2	NA	NA	NA	NA	NA	NA	NA	NA	NA	NA	NA	NA	NA
SLC17A3	PRSS22	NA	NA	NA	NA	NA	NA	NA	NA	NA	NA	NA	NA	NA
SLC23A3	PTPN6	NA	NA	NA	NA	NA	NA	NA	NA	NA	NA	NA	NA	NA
SLC2A1	RAB27A	NA	NA	NA	NA	NA	NA	NA	NA	NA	NA	NA	NA	NA
SLC30A3	RAB37	NA	NA	NA	NA	NA	NA	NA	NA	NA	NA	NA	NA	NA
SLC32A1	RABEP1	NA	NA	NA	NA	NA	NA	NA	NA	NA	NA	NA	NA	NA
SLC35A3	RASSF4	NA	NA	NA	NA	NA	NA	NA	NA	NA	NA	NA	NA	NA
SLC6A5	REEP1	NA	NA	NA	NA	NA	NA	NA	NA	NA	NA	NA	NA	NA
SLCO2A1	RETN	NA	NA	NA	NA	NA	NA	NA	NA	NA	NA	NA	NA	NA
SMC3	RETSAT	NA	NA	NA	NA	NA	NA	NA	NA	NA	NA	NA	NA	NA
SMC5	RHOQ	NA	NA	NA	NA	NA	NA	NA	NA	NA	NA	NA	NA	NA
SMCR8	RIPK3	NA	NA	NA	NA	NA	NA	NA	NA	NA	NA	NA	NA	NA
SNORA71C	RNF212	NA	NA	NA	NA	NA	NA	NA	NA	NA	NA	NA	NA	NA
SNRPD2P2	RNF216	NA	NA	NA	NA	NA	NA	NA	NA	NA	NA	NA	NA	NA
SPNS3	RNFT2	NA	NA	NA	NA	NA	NA	NA	NA	NA	NA	NA	NA	NA
SPRR3	RPP25	NA	NA	NA	NA	NA	NA	NA	NA	NA	NA	NA	NA	NA
SSH1	SAMD13	NA	NA	NA	NA	NA	NA	NA	NA	NA	NA	NA	NA	NA
ST8SIA3	SCPEP1	NA	NA	NA	NA	NA	NA	NA	NA	NA	NA	NA	NA	NA
STAG1	SCT	NA	NA	NA	NA	NA	NA	NA	NA	NA	NA	NA	NA	NA
SUSD5	SCUBE1	NA	NA	NA	NA	NA	NA	NA	NA	NA	NA	NA	NA	NA
SYTL1	SEC14L4	NA	NA	NA	NA	NA	NA	NA	NA	NA	NA	NA	NA	NA
TACR2	SESTD1	NA	NA	NA	NA	NA	NA	NA	NA	NA	NA	NA	NA	NA
TANK	SH2D1A	NA	NA	NA	NA	NA	NA	NA	NA	NA	NA	NA	NA	NA
TAOK3	SHMT1	NA	NA	NA	NA	NA	NA	NA	NA	NA	NA	NA	NA	NA
TCF23	SIGLEC14	NA	NA	NA	NA	NA	NA	NA	NA	NA	NA	NA	NA	NA
TCTEX1D4	SLC14A2	NA	NA	NA	NA	NA	NA	NA	NA	NA	NA	NA	NA	NA
TDRD10	SLC15A2	NA	NA	NA	NA	NA	NA	NA	NA	NA	NA	NA	NA	NA
TFAM	SLC22A1	NA	NA	NA	NA	NA	NA	NA	NA	NA	NA	NA	NA	NA
TFDP1	SLC23A3	NA	NA	NA	NA	NA	NA	NA	NA	NA	NA	NA	NA	NA
TFF2	SLC25A15	NA	NA	NA	NA	NA	NA	NA	NA	NA	NA	NA	NA	NA
TGFBR1	SLC29A4	NA	NA	NA	NA	NA	NA	NA	NA	NA	NA	NA	NA	NA
TH	SLC2A13	NA	NA	NA	NA	NA	NA	NA	NA	NA	NA	NA	NA	NA
THBS3	SLC30A3	NA	NA	NA	NA	NA	NA	NA	NA	NA	NA	NA	NA	NA
TM4SF5	SLC30A6	NA	NA	NA	NA	NA	NA	NA	NA	NA	NA	NA	NA	NA
TMEM19	SLC32A1	NA	NA	NA	NA	NA	NA	NA	NA	NA	NA	NA	NA	NA
TMEM87B	SLC35F5	NA	NA	NA	NA	NA	NA	NA	NA	NA	NA	NA	NA	NA
TMPRSS6	SLC38A1	NA	NA	NA	NA	NA	NA	NA	NA	NA	NA	NA	NA	NA
TOPBP1	SLC5A10	NA	NA	NA	NA	NA	NA	NA	NA	NA	NA	NA	NA	NA
TRMT6	SLC5A2	NA	NA	NA	NA	NA	NA	NA	NA	NA	NA	NA	NA	NA
TRPM7	SLC6A5	NA	NA	NA	NA	NA	NA	NA	NA	NA	NA	NA	NA	NA
TSFM	SMCHD1	NA	NA	NA	NA	NA	NA	NA	NA	NA	NA	NA	NA	NA
TSN	SNRPD2P2	NA	NA	NA	NA	NA	NA	NA	NA	NA	NA	NA	NA	NA
TTC9B	SNX14	NA	NA	NA	NA	NA	NA	NA	NA	NA	NA	NA	NA	NA
TTLL9	SPAG7	NA	NA	NA	NA	NA	NA	NA	NA	NA	NA	NA	NA	NA
TUBGCP3	ST7L	NA	NA	NA	NA	NA	NA	NA	NA	NA	NA	NA	NA	NA
UBA2	ST8SIA3	NA	NA	NA	NA	NA	NA	NA	NA	NA	NA	NA	NA	NA
UBE2B	STAG2	NA	NA	NA	NA	NA	NA	NA	NA	NA	NA	NA	NA	NA
UBXN4	STEAP1	NA	NA	NA	NA	NA	NA	NA	NA	NA	NA	NA	NA	NA
URB2	SYPL1	NA	NA	NA	NA	NA	NA	NA	NA	NA	NA	NA	NA	NA
USP1	TACC2	NA	NA	NA	NA	NA	NA	NA	NA	NA	NA	NA	NA	NA
VAV2	TCEANC	NA	NA	NA	NA	NA	NA	NA	NA	NA	NA	NA	NA	NA
VPREB3	TCFL5	NA	NA	NA	NA	NA	NA	NA	NA	NA	NA	NA	NA	NA
VWA2	TDP2	NA	NA	NA	NA	NA	NA	NA	NA	NA	NA	NA	NA	NA
WDFY4	TERF1	NA	NA	NA	NA	NA	NA	NA	NA	NA	NA	NA	NA	NA
WDR38	TEX101	NA	NA	NA	NA	NA	NA	NA	NA	NA	NA	NA	NA	NA
WNT1	TFAM	NA	NA	NA	NA	NA	NA	NA	NA	NA	NA	NA	NA	NA
WNT4	TFR2	NA	NA	NA	NA	NA	NA	NA	NA	NA	NA	NA	NA	NA
XPO1	TMEM38B	NA	NA	NA	NA	NA	NA	NA	NA	NA	NA	NA	NA	NA
ZC3H12D	TMEM50B	NA	NA	NA	NA	NA	NA	NA	NA	NA	NA	NA	NA	NA
ZC3H13	TNFRSF18	NA	NA	NA	NA	NA	NA	NA	NA	NA	NA	NA	NA	NA
ZDHHC5	TNFRSF4	NA	NA	NA	NA	NA	NA	NA	NA	NA	NA	NA	NA	NA
ZIC4	TOMM20L	NA	NA	NA	NA	NA	NA	NA	NA	NA	NA	NA	NA	NA
ZNF205	TOR1B	NA	NA	NA	NA	NA	NA	NA	NA	NA	NA	NA	NA	NA
ZNF365	TPO	NA	NA	NA	NA	NA	NA	NA	NA	NA	NA	NA	NA	NA
ZNF367	TRAF1	NA	NA	NA	NA	NA	NA	NA	NA	NA	NA	NA	NA	NA
ZNF479	TREX2	NA	NA	NA	NA	NA	NA	NA	NA	NA	NA	NA	NA	NA
ZNF560	TRIM29	NA	NA	NA	NA	NA	NA	NA	NA	NA	NA	NA	NA	NA
ZNF680	TRIM62	NA	NA	NA	NA	NA	NA	NA	NA	NA	NA	NA	NA	NA
ZSCAN1	TRPM3	NA	NA	NA	NA	NA	NA	NA	NA	NA	NA	NA	NA	NA
ZYG11A	TRPM5	NA	NA	NA	NA	NA	NA	NA	NA	NA	NA	NA	NA	NA
NA	TRPV5	NA	NA	NA	NA	NA	NA	NA	NA	NA	NA	NA	NA	NA
NA	TSPAN15	NA	NA	NA	NA	NA	NA	NA	NA	NA	NA	NA	NA	NA
NA	TTC16	NA	NA	NA	NA	NA	NA	NA	NA	NA	NA	NA	NA	NA
NA	TTC39A	NA	NA	NA	NA	NA	NA	NA	NA	NA	NA	NA	NA	NA
NA	TTL	NA	NA	NA	NA	NA	NA	NA	NA	NA	NA	NA	NA	NA
NA	TTLL9	NA	NA	NA	NA	NA	NA	NA	NA	NA	NA	NA	NA	NA
NA	UBE2G2	NA	NA	NA	NA	NA	NA	NA	NA	NA	NA	NA	NA	NA
NA	UBR4	NA	NA	NA	NA	NA	NA	NA	NA	NA	NA	NA	NA	NA
NA	UNC13A	NA	NA	NA	NA	NA	NA	NA	NA	NA	NA	NA	NA	NA
NA	UNC5CL	NA	NA	NA	NA	NA	NA	NA	NA	NA	NA	NA	NA	NA
NA	VGLL2	NA	NA	NA	NA	NA	NA	NA	NA	NA	NA	NA	NA	NA
NA	VMAC	NA	NA	NA	NA	NA	NA	NA	NA	NA	NA	NA	NA	NA
NA	VPREB3	NA	NA	NA	NA	NA	NA	NA	NA	NA	NA	NA	NA	NA
NA	VSTM2A	NA	NA	NA	NA	NA	NA	NA	NA	NA	NA	NA	NA	NA
NA	VWA2	NA	NA	NA	NA	NA	NA	NA	NA	NA	NA	NA	NA	NA
NA	WASF3	NA	NA	NA	NA	NA	NA	NA	NA	NA	NA	NA	NA	NA
NA	WDFY4	NA	NA	NA	NA	NA	NA	NA	NA	NA	NA	NA	NA	NA
NA	WDR38	NA	NA	NA	NA	NA	NA	NA	NA	NA	NA	NA	NA	NA
NA	WFDC2	NA	NA	NA	NA	NA	NA	NA	NA	NA	NA	NA	NA	NA
NA	WNK3	NA	NA	NA	NA	NA	NA	NA	NA	NA	NA	NA	NA	NA
NA	WNT1	NA	NA	NA	NA	NA	NA	NA	NA	NA	NA	NA	NA	NA
NA	WNT4	NA	NA	NA	NA	NA	NA	NA	NA	NA	NA	NA	NA	NA
NA	ZBTB8OS	NA	NA	NA	NA	NA	NA	NA	NA	NA	NA	NA	NA	NA
NA	ZC3H12D	NA	NA	NA	NA	NA	NA	NA	NA	NA	NA	NA	NA	NA
NA	ZCRB1	NA	NA	NA	NA	NA	NA	NA	NA	NA	NA	NA	NA	NA
NA	ZFP2	NA	NA	NA	NA	NA	NA	NA	NA	NA	NA	NA	NA	NA
NA	ZIC4	NA	NA	NA	NA	NA	NA	NA	NA	NA	NA	NA	NA	NA
NA	ZNF420	NA	NA	NA	NA	NA	NA	NA	NA	NA	NA	NA	NA	NA
NA	ZNF430	NA	NA	NA	NA	NA	NA	NA	NA	NA	NA	NA	NA	NA
NA	ZNF560	NA	NA	NA	NA	NA	NA	NA	NA	NA	NA	NA	NA	NA
NA	ZSCAN1	NA	NA	NA	NA	NA	NA	NA	NA	NA	NA	NA	NA	NA

## Sheet: GSE59861_12h_EMTAB2086
X1_sets_EMTAB2086_70_vs_30	X1_sets_EMTAB2086_80_vs_30	X1_sets_GSE59861_12h_2Gy	X1_sets_GSE59861_12h_5cGy	X2_sets_EMTAB2086_70_vs_30_EMTAB2086_80_vs_30	X2_sets_EMTAB2086_70_vs_30_GSE59861_12h_2Gy	X2_sets_EMTAB2086_70_vs_30_GSE59861_12h_5cGy	X2_sets_EMTAB2086_80_vs_30_GSE59861_12h_2Gy	X2_sets_EMTAB2086_80_vs_30_GSE59861_12h_5cGy	X2_sets_GSE59861_12h_2Gy_GSE59861_12h_5cGy	X3_sets_EMTAB2086_70_vs_30_EMTAB2086_80_vs_30_GSE59861_12h_2Gy	X3_sets_EMTAB2086_70_vs_30_EMTAB2086_80_vs_30_GSE59861_12h_5cGy	X3_sets_EMTAB2086_70_vs_30_GSE59861_12h_2Gy_GSE59861_12h_5cGy	X3_sets_EMTAB2086_80_vs_30_GSE59861_12h_2Gy_GSE59861_12h_5cGy	X4_sets_EMTAB2086_70_vs_30_EMTAB2086_80_vs_30_GSE59861_12h_2Gy_GSE59861_12h_5cGy
ABCA2	A2M	ABCA1	AANAT	ABCA2	BCL2L1	CHAC1	ANK1	ANK1	ABCA1	BCL2L1	CLN8	CHAC1	ANK1	EGR2
ABCB1	ABAT	ABHD6	ABCA1	ABCB1	BTG2	CLN8	APH1B	CACNA2D3	AKAP1	BTG2	EGR2	EGR2	DCLK1	GDF15
ABL2	ABCA12	AKAP1	AKAP1	ABL2	CDKN1A	EGR2	BCL2L1	CELF2	AKNA	CDKN1A	GDF15	GDF15	EGR2	KCNN2
ACTBL2	ABCA2	AKNA	AKNA	ACTBL2	CHAC1	GDF15	BTG2	CLN8	ANGPTL2	DNAJC6	KCNN2	KCNN2	GDF15	LIMK2
ACTR10	ABCA3	ANGPTL2	ANGPTL2	ACTR10	CTHRC1	KCNN2	CACNA1C	DCLK1	ANK1	EDA2R	LIMK2	LIMK2	KCNN2	PPFIBP2
ACYP2	ABCA4	ANK1	ANK1	ACYP2	DNAJC6	LIMK2	CDKN1A	EGR2	APCDD1	EGR2	PPFIBP2	PPFIBP2	LIMK2	SVIL
ADAM19	ABCA7	ANKRD34A	APCDD1	ADAM19	EDA2R	PPFIBP2	DCLK1	GDF15	APOL6	FAM43A	SVIL	SESN2	ORAI3	NA
ADAMTS12	ABCB1	APCDD1	APOL6	ADAMTS12	EGR2	SESN2	DLL1	HDAC11	ARHGEF2	GDF15	VGLL3	SVIL	PPFIBP2	NA
ADAMTSL5	ABCD1	APH1A	ARHGEF2	ADAMTSL5	FAM43A	SVIL	DNAJC6	KCNN2	ARMC9	KCNN2	YPEL2	TRAF1	RRAGC	NA
ADD3	ABHD12	APH1B	ARMC9	AGRN	GDF15	TRAF1	EDA2R	KIF26B	ARPC3	LIMK2	NA	NA	SLC22A15	NA
AGRN	ABL2	APOL6	ARPC3	AHNAK2	KCNN2	VGLL3	EGR2	LIMK2	ATG14	MAMDC2	NA	NA	STC2	NA
AHNAK2	ABLIM1	ARFIP2	ATG14	AIG1	LIMK2	YPEL2	FAM43A	ORAI3	ATXN7L1	MDM2	NA	NA	SVIL	NA
AIG1	ABLIM3	ARHGEF2	ATXN7L1	ANGPT1	MAMDC2	NA	GDF15	PALMD	BBC3	OSBPL3	NA	NA	TSC22D3	NA
ANGPT1	ABTB2	ARHGEF3	BBC3	ANGPTL4	MDM2	NA	KCNN2	PPFIBP2	BCDIN3D	PHLDA3	NA	NA	ZNF425	NA
ANGPTL4	ACAA1	ARMC9	BCDIN3D	ANKH	OSBPL3	NA	KRT17	RRAGC	C12ORF65	PPFIBP2	NA	NA	NA	NA
ANKH	ACER1	ARPC3	BCL11A	ANKRA2	PHLDA3	NA	LIMK2	SLC22A15	C1ORF109	PSTPIP2	NA	NA	NA	NA
ANKRA2	ACER2	ATF4	BCL2L11	ANKRD1	PPFIBP2	NA	MAMDC2	STC2	CASKIN2	SESN1	NA	NA	NA	NA
ANKRD1	ACOX1	ATG14	BCORL1	ANKRD42	PSTPIP2	NA	MDM2	SVIL	CEP68	SHC3	NA	NA	NA	NA
ANKRD42	ACSL5	ATXN7L1	BDH1	ANKRD44	SESN1	NA	MFAP3L	TSC22D3	CHAC1	SVIL	NA	NA	NA	NA
ANKRD44	ACTBL2	B3GALT4	BDKRB2	ANO10	SESN2	NA	ORAI3	VGLL3	COQ10A	TFEB	NA	NA	NA	NA
ANO10	ACTR10	BBC3	BMP2K	ANXA4	SHC3	NA	OSBPL3	YPEL2	CTNS	TNFRSF10B	NA	NA	NA	NA
ANO6	ACVR2A	BCDIN3D	C12ORF65	APBB2	SVIL	NA	PARD6G	ZNF425	DAB2IP	TP53INP1	NA	NA	NA	NA
ANXA4	ACYP2	BCL2L1	C1ORF109	ARHGAP26	TFEB	NA	PHLDA3	NA	DCLK1	ZFHX2	NA	NA	NA	NA
APBB2	ADAM12	BCL6	C2ORF68	ARHGAP31	TNFRSF10B	NA	POLH	NA	DCP1B	ZMAT3	NA	NA	NA	NA
ARHGAP10	ADAM19	BTG2	C9ORF40	ARHGAP5	TP53INP1	NA	POU2F2	NA	DDIT3	NA	NA	NA	NA	NA
ARHGAP26	ADAM23	C12ORF65	CACNA2D3	ARRDC1	TRAF1	NA	PPFIBP2	NA	DDIT4	NA	NA	NA	NA	NA
ARHGAP31	ADAM32	C1ORF109	CASKIN2	ARSK	ZFHX2	NA	PSTPIP2	NA	DOCK3	NA	NA	NA	NA	NA
ARHGAP5	ADAMTS12	CACNA1C	CCNG2	ASAH1	ZMAT3	NA	RRAGC	NA	EGR2	NA	NA	NA	NA	NA
ARRDC1	ADAMTS13	CAMK2G	CDKN1C	ASAP2	NA	NA	SCIN	NA	EVC2	NA	NA	NA	NA	NA
ARSK	ADAMTSL4	CASKIN2	CELF2	ASCC3	NA	NA	SESN1	NA	FAM117A	NA	NA	NA	NA	NA
ASAH1	ADAMTSL5	CCDC130	CENPP	ATP10A	NA	NA	SHC3	NA	GDF15	NA	NA	NA	NA	NA
ASAP2	ADCK2	CCNG1	CEP68	ATP11A	NA	NA	SLC22A15	NA	GDF5	NA	NA	NA	NA	NA
ASCC3	ADCY6	CDKAL1	CHAC1	ATP13A2	NA	NA	SLC2A11	NA	GNPDA1	NA	NA	NA	NA	NA
ATP10A	ADHFE1	CDKN1A	CKAP2	ATP6AP2	NA	NA	STC2	NA	GRASP	NA	NA	NA	NA	NA
ATP11A	ADIPOR1	CEP68	CLDN23	ATP6V0A1	NA	NA	SVIL	NA	HPS4	NA	NA	NA	NA	NA
ATP13A2	ADRA2C	CHAC1	CLK2	ATP9A	NA	NA	TFEB	NA	IFFO1	NA	NA	NA	NA	NA
ATP6AP2	ADRB2	COPS6	CLN8	B4GALNT1	NA	NA	TNFRSF10B	NA	INHBE	NA	NA	NA	NA	NA
ATP6V0A1	AES	COQ10A	CNP	BACH1	NA	NA	TP53INP1	NA	JRK	NA	NA	NA	NA	NA
ATP9A	AFAP1	CPSF4	COQ10A	BAIAP2L1	NA	NA	TSC22D3	NA	KCNE4	NA	NA	NA	NA	NA
B2M	AFF1	CREBZF	CORO2A	BANK1	NA	NA	VWCE	NA	KCNN2	NA	NA	NA	NA	NA
B4GALNT1	AGRN	CTHRC1	CPEB1	BBS2	NA	NA	WSB1	NA	KCTD7	NA	NA	NA	NA	NA
BAALC	AGXT	CTNS	CPEB3	BCL2L1	NA	NA	ZFHX2	NA	KIAA0513	NA	NA	NA	NA	NA
BACH1	AHCYL2	DAB2IP	CRYM	BHLHE40	NA	NA	ZMAT3	NA	KIAA1217	NA	NA	NA	NA	NA
BAIAP2L1	AHNAK2	DCLK1	CTDSPL	BLCAP	NA	NA	ZNF425	NA	KLF4	NA	NA	NA	NA	NA
BANK1	AIG1	DCP1B	CTNS	BLOC1S2	NA	NA	NA	NA	LIMK2	NA	NA	NA	NA	NA
BAX	AK4	DDB2	DAB2IP	BLZF1	NA	NA	NA	NA	MAP3K12	NA	NA	NA	NA	NA
BBS2	AKAP6	DDIT3	DAPK1	BPGM	NA	NA	NA	NA	MAVS	NA	NA	NA	NA	NA
BBS9	ALDH5A1	DDIT4	DCLK1	BTG2	NA	NA	NA	NA	MTHFR	NA	NA	NA	NA	NA
BCL2L1	ALDOAP2	DHRS3	DCP1B	BTN2A2	NA	NA	NA	NA	NIPAL4	NA	NA	NA	NA	NA
BHLHE40	ALKBH6	DIDO1	DDIT3	BTRC	NA	NA	NA	NA	OGT	NA	NA	NA	NA	NA
BIRC3	ALPK2	DLL1	DDIT4	C14ORF28	NA	NA	NA	NA	OLFML2B	NA	NA	NA	NA	NA
BLCAP	ALS2CL	DNAJC27	DNAJC18	C1ORF54	NA	NA	NA	NA	ORAI3	NA	NA	NA	NA	NA
BLOC1S2	AMIGO1	DNAJC6	DOCK3	C3ORF35	NA	NA	NA	NA	PEX11B	NA	NA	NA	NA	NA
BLZF1	AMIGO2	DOCK3	EBF1	C3ORF52	NA	NA	NA	NA	PLXNB2	NA	NA	NA	NA	NA
BPGM	AMPD1	DVL2	EGR2	C4ORF3	NA	NA	NA	NA	POLG2	NA	NA	NA	NA	NA
BTBD3	AMPD3	EDA2R	EVC2	C4ORF36	NA	NA	NA	NA	PPFIBP2	NA	NA	NA	NA	NA
BTG2	AMZ1	EGR2	FAM117A	C5AR1	NA	NA	NA	NA	PPM1B	NA	NA	NA	NA	NA
BTN2A2	ANGPT1	ENO3	FANCF	C5ORF15	NA	NA	NA	NA	PPP1R10	NA	NA	NA	NA	NA
BTRC	ANGPTL4	EVC2	FBXO39	C5ORF46	NA	NA	NA	NA	PRKD2	NA	NA	NA	NA	NA
C14ORF28	ANK1	EXOSC10	FMNL1	C7	NA	NA	NA	NA	PTGES	NA	NA	NA	NA	NA
C16ORF72	ANK2	FAM117A	FRAT1	CACNA2D1	NA	NA	NA	NA	RRAGC	NA	NA	NA	NA	NA
C1ORF54	ANKH	FAM43A	FZR1	CADM3	NA	NA	NA	NA	SENP8	NA	NA	NA	NA	NA
C2CD2	ANKRA2	FAM53C	GDF15	CALCOCO1	NA	NA	NA	NA	SESN2	NA	NA	NA	NA	NA
C3ORF35	ANKRD1	FBXL19	GDF5	CALD1	NA	NA	NA	NA	SFRP2	NA	NA	NA	NA	NA
C3ORF52	ANKRD29	FBXO22	GNPDA1	CAMTA2	NA	NA	NA	NA	SLC22A15	NA	NA	NA	NA	NA
C4ORF3	ANKRD37	FDXR	GRASP	CAP2	NA	NA	NA	NA	SOX4	NA	NA	NA	NA	NA
C4ORF36	ANKRD42	GDF15	HDAC11	CASS4	NA	NA	NA	NA	STC2	NA	NA	NA	NA	NA
C5AR1	ANKRD44	GDF5	HPS4	CCDC81	NA	NA	NA	NA	SVIL	NA	NA	NA	NA	NA
C5ORF15	ANKRD46	GGA1	IFFO1	CCIN	NA	NA	NA	NA	TET3	NA	NA	NA	NA	NA
C5ORF46	ANKRD52	GGA2	INHBE	CCL2	NA	NA	NA	NA	TMEM177	NA	NA	NA	NA	NA
C7	ANKS1B	GIGYF2	IP6K1	CCND1	NA	NA	NA	NA	TNRC6C	NA	NA	NA	NA	NA
CACNA2D1	ANO10	GNPDA1	IRF2	CCND2	NA	NA	NA	NA	TRAF1	NA	NA	NA	NA	NA
CADM3	ANTXR1	GPNMB	IRF2BP2	CD109	NA	NA	NA	NA	TRIM4	NA	NA	NA	NA	NA
CALCOCO1	ANXA4	GRASP	ISL2	CD46	NA	NA	NA	NA	TSC22D3	NA	NA	NA	NA	NA
CALD1	ANXA6	HDHD3	JRK	CD63	NA	NA	NA	NA	VEGFA	NA	NA	NA	NA	NA
CAMTA2	APBB2	HDLBP	KALRN	CD9	NA	NA	NA	NA	ZFYVE1	NA	NA	NA	NA	NA
CAP2	APH1B	HEMK1	KCNE4	CDH13	NA	NA	NA	NA	ZNF232	NA	NA	NA	NA	NA
CASS4	APLP1	HKR1	KCNN2	CDK6	NA	NA	NA	NA	ZNF419	NA	NA	NA	NA	NA
CCDC81	APOD	HPS4	KCTD7	CDKN1A	NA	NA	NA	NA	ZNF425	NA	NA	NA	NA	NA
CCIN	AQP4	IFFO1	KDM3B	CDKN2B	NA	NA	NA	NA	ZNF451	NA	NA	NA	NA	NA
CCL2	AR	INHBE	KIAA0513	CDYL2	NA	NA	NA	NA	ZNF552	NA	NA	NA	NA	NA
CCND1	AREG	IRF9	KIAA0586	CENPT	NA	NA	NA	NA	ZNF589	NA	NA	NA	NA	NA
CCND2	ARHGAP24	JRK	KIAA1217	CERCAM	NA	NA	NA	NA	ZNF691	NA	NA	NA	NA	NA
CD109	ARHGAP26	KCNE4	KIAA1958	CFL2	NA	NA	NA	NA	ZNF773	NA	NA	NA	NA	NA
CD46	ARHGAP29	KCNN2	KIF26B	CFLAR	NA	NA	NA	NA	NA	NA	NA	NA	NA	NA
CD63	ARHGAP31	KCTD7	KLF4	CHIC2	NA	NA	NA	NA	NA	NA	NA	NA	NA	NA
CD82	ARHGAP5	KDSR	LIMK2	CHPF	NA	NA	NA	NA	NA	NA	NA	NA	NA	NA
CD9	ARHGAP9	KHNYN	LOC100133091	CHRNA1	NA	NA	NA	NA	NA	NA	NA	NA	NA	NA
CDC42EP3	ARHGDIB	KIAA0513	LYSMD4	CHST11	NA	NA	NA	NA	NA	NA	NA	NA	NA	NA
CDH13	ARHGEF37	KIAA1217	MAP3K12	CITED2	NA	NA	NA	NA	NA	NA	NA	NA	NA	NA
CDK6	ARHGEF4	KLF4	MAVS	CLDN1	NA	NA	NA	NA	NA	NA	NA	NA	NA	NA
CDKN1A	ARL6IP5	KRT17	METTL7A	CLDN16	NA	NA	NA	NA	NA	NA	NA	NA	NA	NA
CDKN2B	ARMCX3	LIMK2	MKNK2	CLN5	NA	NA	NA	NA	NA	NA	NA	NA	NA	NA
CDYL2	ARRDC1	LRRC14	MMAB	CLN8	NA	NA	NA	NA	NA	NA	NA	NA	NA	NA
CENPT	ARRDC4	MAMDC2	MRGPRF	CLTB	NA	NA	NA	NA	NA	NA	NA	NA	NA	NA
CERCAM	ARSA	MAP3K12	MTHFR	CMBL	NA	NA	NA	NA	NA	NA	NA	NA	NA	NA
CFH	ARSD	MAP4K4	MTMR14	CMIP	NA	NA	NA	NA	NA	NA	NA	NA	NA	NA
CFL2	ARSG	MAVS	NAGS	CMPK1	NA	NA	NA	NA	NA	NA	NA	NA	NA	NA
CFLAR	ARSK	MBP	NDE1	CNIH3	NA	NA	NA	NA	NA	NA	NA	NA	NA	NA
CHAC1	ARV1	MDM2	NDST2	CNNM1	NA	NA	NA	NA	NA	NA	NA	NA	NA	NA
CHIC2	ASAH1	MFAP3L	NFATC4	COBLL1	NA	NA	NA	NA	NA	NA	NA	NA	NA	NA
CHPF	ASAP2	MMP11	NFIX	COG6	NA	NA	NA	NA	NA	NA	NA	NA	NA	NA
CHRNA1	ASB16	MTHFR	NIPAL4	COL11A1	NA	NA	NA	NA	NA	NA	NA	NA	NA	NA
CHST11	ASCC3	MXRA8	NIT1	COL8A1	NA	NA	NA	NA	NA	NA	NA	NA	NA	NA
CHST7	ASL	N4BP2L1	OGT	COPZ2	NA	NA	NA	NA	NA	NA	NA	NA	NA	NA
CITED2	ATAD1	NFX1	OLFML2B	COQ10B	NA	NA	NA	NA	NA	NA	NA	NA	NA	NA
CLDN1	ATG4A	NIPAL4	ORAI3	CPEB2	NA	NA	NA	NA	NA	NA	NA	NA	NA	NA
CLDN12	ATL1	NYNRIN	PACSIN2	CPEB4	NA	NA	NA	NA	NA	NA	NA	NA	NA	NA
CLDN16	ATL3	OGT	PALMD	CPPED1	NA	NA	NA	NA	NA	NA	NA	NA	NA	NA
CLN5	ATOX1	OLFML2B	PAQR8	CREB3	NA	NA	NA	NA	NA	NA	NA	NA	NA	NA
CLN8	ATP10A	ORAI3	PEX11B	CSGALNACT2	NA	NA	NA	NA	NA	NA	NA	NA	NA	NA
CLTB	ATP10D	OSBPL3	PHF21A	CST3	NA	NA	NA	NA	NA	NA	NA	NA	NA	NA
CMBL	ATP11A	OXA1L	PITPNM2	CTBS	NA	NA	NA	NA	NA	NA	NA	NA	NA	NA
CMIP	ATP13A2	PARD6G	PLXNB2	CTGF	NA	NA	NA	NA	NA	NA	NA	NA	NA	NA
CMPK1	ATP2B4	PELI3	POLG2	CTSO	NA	NA	NA	NA	NA	NA	NA	NA	NA	NA
CNIH3	ATP2C1	PEX11B	PPFIBP2	CTSZ	NA	NA	NA	NA	NA	NA	NA	NA	NA	NA
CNNM1	ATP6AP1	PHLDA3	PPM1B	CXCL10	NA	NA	NA	NA	NA	NA	NA	NA	NA	NA
CNST	ATP6AP2	PLEKHO2	PPP1R10	CYB5R1	NA	NA	NA	NA	NA	NA	NA	NA	NA	NA
CNTN3	ATP6V0A1	PLXNB2	PRKD2	CYBA	NA	NA	NA	NA	NA	NA	NA	NA	NA	NA
COBLL1	ATP6V0A4	POLG2	PTGES	CYBRD1	NA	NA	NA	NA	NA	NA	NA	NA	NA	NA
COG5	ATP6V0E1	POLH	PXK	CYFIP2	NA	NA	NA	NA	NA	NA	NA	NA	NA	NA
COG6	ATP6V1E1	POU2F2	RCCD1	CYP2U1	NA	NA	NA	NA	NA	NA	NA	NA	NA	NA
COL11A1	ATP6V1G1	PPFIBP2	RERE	CYR61	NA	NA	NA	NA	NA	NA	NA	NA	NA	NA
COL6A1	ATP7B	PPM1B	ROR2	DAP	NA	NA	NA	NA	NA	NA	NA	NA	NA	NA
COL8A1	ATP9A	PPM1D	RRAGC	DDR2	NA	NA	NA	NA	NA	NA	NA	NA	NA	NA
COPZ2	ATRN	PPP1R10	RUNX2	DDX58	NA	NA	NA	NA	NA	NA	NA	NA	NA	NA
COQ10B	ATRNL1	PPP2R5D	SENP8	DGKA	NA	NA	NA	NA	NA	NA	NA	NA	NA	NA
CPEB2	B3GAT2	PRKD2	SESN2	DGKI	NA	NA	NA	NA	NA	NA	NA	NA	NA	NA
CPEB4	B3GAT3	PSEN1	SETBP1	DHRS7	NA	NA	NA	NA	NA	NA	NA	NA	NA	NA
CPPED1	B3GNT4	PSTPIP2	SFRP2	DMD	NA	NA	NA	NA	NA	NA	NA	NA	NA	NA
CREB3	B3GNT9	PTGES	SH3BP2	DMPK	NA	NA	NA	NA	NA	NA	NA	NA	NA	NA
CSGALNACT2	B4GALNT1	RAD52	SLC22A15	DNAJB4	NA	NA	NA	NA	NA	NA	NA	NA	NA	NA
CST3	B4GALT1	RFX5	SMYD4	DNAJB9	NA	NA	NA	NA	NA	NA	NA	NA	NA	NA
CTAGE1	B4GALT7	RRAGC	SOX4	DNAJC6	NA	NA	NA	NA	NA	NA	NA	NA	NA	NA
CTBS	BACH1	SCIN	SPSB2	DNASE1L1	NA	NA	NA	NA	NA	NA	NA	NA	NA	NA
CTGF	BAD	SENP8	SSH2	DOCK9	NA	NA	NA	NA	NA	NA	NA	NA	NA	NA
CTHRC1	BAIAP2L1	SERAC1	STC2	DOK1	NA	NA	NA	NA	NA	NA	NA	NA	NA	NA
CTSK	BANK1	SERPINF1	SUOX	DRAM1	NA	NA	NA	NA	NA	NA	NA	NA	NA	NA
CTSO	BBS2	SESN1	SVIL	DRP2	NA	NA	NA	NA	NA	NA	NA	NA	NA	NA
CTSZ	BCAS3	SESN2	TAF4	DSP	NA	NA	NA	NA	NA	NA	NA	NA	NA	NA
CXCL10	BCL2L1	SFRP2	TET3	DUSP3	NA	NA	NA	NA	NA	NA	NA	NA	NA	NA
CYB5R1	BHLHE40	SHC3	TIGD2	DUSP6	NA	NA	NA	NA	NA	NA	NA	NA	NA	NA
CYBA	BLCAP	SIRT4	TMEM140	DYNLT3	NA	NA	NA	NA	NA	NA	NA	NA	NA	NA
CYBRD1	BLOC1S2	SLC22A15	TMEM177	EBI3	NA	NA	NA	NA	NA	NA	NA	NA	NA	NA
CYFIP2	BLZF1	SLC2A11	TNIK	ECM1	NA	NA	NA	NA	NA	NA	NA	NA	NA	NA
CYLD	BMP1	SLC7A8	TNRC6C	EDA2R	NA	NA	NA	NA	NA	NA	NA	NA	NA	NA
CYP2U1	BMP2	SNRNP48	TPP1	EDEM3	NA	NA	NA	NA	NA	NA	NA	NA	NA	NA
CYR61	BMP6	SOX4	TRAF1	EDIL3	NA	NA	NA	NA	NA	NA	NA	NA	NA	NA
DAP	BMPER	SPATA2	TRIM4	EDN1	NA	NA	NA	NA	NA	NA	NA	NA	NA	NA
DDR2	BPGM	SPP1	TRIM68	EGR2	NA	NA	NA	NA	NA	NA	NA	NA	NA	NA
DDX58	BSDC1	ST5	TSC22D3	ELFN1	NA	NA	NA	NA	NA	NA	NA	NA	NA	NA
DGKA	BTBD1	STC2	USP30	ENC1	NA	NA	NA	NA	NA	NA	NA	NA	NA	NA
DGKI	BTBD9	STOM	VDR	EPHA2	NA	NA	NA	NA	NA	NA	NA	NA	NA	NA
DHRS7	BTG2	SVIL	VEGFA	EPHX4	NA	NA	NA	NA	NA	NA	NA	NA	NA	NA
DMD	BTN2A2	TET3	VGLL3	EPS8L2	NA	NA	NA	NA	NA	NA	NA	NA	NA	NA
DMPK	BTRC	TFEB	WWP2	ERLEC1	NA	NA	NA	NA	NA	NA	NA	NA	NA	NA
DNAJB4	C11ORF87	TMEM144	YPEL2	ERP44	NA	NA	NA	NA	NA	NA	NA	NA	NA	NA
DNAJB9	C12ORF57	TMEM177	ZBTB44	ERRFI1	NA	NA	NA	NA	NA	NA	NA	NA	NA	NA
DNAJC28	C14ORF28	TNFRSF10B	ZFYVE1	ETHE1	NA	NA	NA	NA	NA	NA	NA	NA	NA	NA
DNAJC6	C16ORF74	TNNT3	ZNF232	ETNK2	NA	NA	NA	NA	NA	NA	NA	NA	NA	NA
DNASE1L1	C19ORF18	TNRC6C	ZNF419	ETV5	NA	NA	NA	NA	NA	NA	NA	NA	NA	NA
DOCK9	C1ORF53	TOMM40L	ZNF425	EVI5	NA	NA	NA	NA	NA	NA	NA	NA	NA	NA
DOK1	C1ORF54	TOP2A	ZNF451	EXPH5	NA	NA	NA	NA	NA	NA	NA	NA	NA	NA
DRAM1	C1QTNF7	TP53INP1	ZNF514	EXTL1	NA	NA	NA	NA	NA	NA	NA	NA	NA	NA
DRP2	C20ORF194	TRAF1	ZNF552	F3	NA	NA	NA	NA	NA	NA	NA	NA	NA	NA
DSP	C21ORF62	TRIM4	ZNF589	FABP3	NA	NA	NA	NA	NA	NA	NA	NA	NA	NA
DUSP14	C2ORF66	TSC22D3	ZNF599	FADS3	NA	NA	NA	NA	NA	NA	NA	NA	NA	NA
DUSP3	C3	UAP1L1	ZNF618	FAM151B	NA	NA	NA	NA	NA	NA	NA	NA	NA	NA
DUSP6	C3ORF35	USP29	ZNF638	FAM174A	NA	NA	NA	NA	NA	NA	NA	NA	NA	NA
DUSP8	C3ORF52	VEGFA	ZNF671	FAM43A	NA	NA	NA	NA	NA	NA	NA	NA	NA	NA
DYNLT3	C3ORF70	VWCE	ZNF691	FAP	NA	NA	NA	NA	NA	NA	NA	NA	NA	NA
EBF3	C4ORF3	WBP2	ZNF773	FAR2	NA	NA	NA	NA	NA	NA	NA	NA	NA	NA
EBI3	C4ORF36	WSB1	ZNF774	FAS	NA	NA	NA	NA	NA	NA	NA	NA	NA	NA
ECM1	C5AR1	ZFHX2	ZSCAN21	FBN1	NA	NA	NA	NA	NA	NA	NA	NA	NA	NA
EDA2R	C5ORF15	ZFYVE1	NA	FBN2	NA	NA	NA	NA	NA	NA	NA	NA	NA	NA
EDEM3	C5ORF46	ZKSCAN3	NA	FBXL2	NA	NA	NA	NA	NA	NA	NA	NA	NA	NA
EDIL3	C6ORF222	ZMAT3	NA	FCGRT	NA	NA	NA	NA	NA	NA	NA	NA	NA	NA
EDN1	C7	ZNF202	NA	FCHSD2	NA	NA	NA	NA	NA	NA	NA	NA	NA	NA
EFNB2	C8ORF34	ZNF232	NA	FER1L4	NA	NA	NA	NA	NA	NA	NA	NA	NA	NA
EGR2	C9ORF131	ZNF419	NA	FGD4	NA	NA	NA	NA	NA	NA	NA	NA	NA	NA
ELFN1	C9ORF170	ZNF425	NA	FHOD3	NA	NA	NA	NA	NA	NA	NA	NA	NA	NA
ENC1	CACNA1C	ZNF451	NA	FLT1	NA	NA	NA	NA	NA	NA	NA	NA	NA	NA
EPHA2	CACNA2D1	ZNF513	NA	FMN1	NA	NA	NA	NA	NA	NA	NA	NA	NA	NA
EPHX4	CACNA2D3	ZNF552	NA	FMOD	NA	NA	NA	NA	NA	NA	NA	NA	NA	NA
EPRS	CACNG6	ZNF589	NA	FNDC3B	NA	NA	NA	NA	NA	NA	NA	NA	NA	NA
EPS8L2	CADM3	ZNF691	NA	FNDC4	NA	NA	NA	NA	NA	NA	NA	NA	NA	NA
ERAP2	CALCA	ZNF773	NA	FOXE1	NA	NA	NA	NA	NA	NA	NA	NA	NA	NA
ERLEC1	CALCOCO1	ZNF785	NA	FRMD6	NA	NA	NA	NA	NA	NA	NA	NA	NA	NA
ERP44	CALCOCO2	ZNF79	NA	FRY	NA	NA	NA	NA	NA	NA	NA	NA	NA	NA
ERRFI1	CALD1	ZSCAN30	NA	FSTL3	NA	NA	NA	NA	NA	NA	NA	NA	NA	NA
ETHE1	CAMK1D	NA	NA	FZD6	NA	NA	NA	NA	NA	NA	NA	NA	NA	NA
ETNK2	CAMLG	NA	NA	GADD45A	NA	NA	NA	NA	NA	NA	NA	NA	NA	NA
ETV5	CAMP	NA	NA	GALNT10	NA	NA	NA	NA	NA	NA	NA	NA	NA	NA
EVI5	CAMTA2	NA	NA	GALNT5	NA	NA	NA	NA	NA	NA	NA	NA	NA	NA
EXPH5	CAP2	NA	NA	GAS6	NA	NA	NA	NA	NA	NA	NA	NA	NA	NA
EXTL1	CAPN6	NA	NA	GATA3	NA	NA	NA	NA	NA	NA	NA	NA	NA	NA
F3	CAPNS2	NA	NA	GBE1	NA	NA	NA	NA	NA	NA	NA	NA	NA	NA
FABP3	CAPS	NA	NA	GCNT2	NA	NA	NA	NA	NA	NA	NA	NA	NA	NA
FADS3	CASS4	NA	NA	GCNT4	NA	NA	NA	NA	NA	NA	NA	NA	NA	NA
FAM151B	CATSPERG	NA	NA	GDF15	NA	NA	NA	NA	NA	NA	NA	NA	NA	NA
FAM174A	CBLN3	NA	NA	GDF6	NA	NA	NA	NA	NA	NA	NA	NA	NA	NA
FAM43A	CCDC113	NA	NA	GDPD1	NA	NA	NA	NA	NA	NA	NA	NA	NA	NA
FAP	CCDC153	NA	NA	GFPT1	NA	NA	NA	NA	NA	NA	NA	NA	NA	NA
FAR2	CCDC50	NA	NA	GIPC1	NA	NA	NA	NA	NA	NA	NA	NA	NA	NA
FAS	CCDC68	NA	NA	GK5	NA	NA	NA	NA	NA	NA	NA	NA	NA	NA
FBLIM1	CCDC69	NA	NA	GOLGB1	NA	NA	NA	NA	NA	NA	NA	NA	NA	NA
FBN1	CCDC80	NA	NA	GPR108	NA	NA	NA	NA	NA	NA	NA	NA	NA	NA
FBN2	CCDC81	NA	NA	GPR137B	NA	NA	NA	NA	NA	NA	NA	NA	NA	NA
FBXL2	CCDC90B	NA	NA	GPR155	NA	NA	NA	NA	NA	NA	NA	NA	NA	NA
FCGRT	CCIN	NA	NA	GRAMD1B	NA	NA	NA	NA	NA	NA	NA	NA	NA	NA
FCHSD2	CCL2	NA	NA	GSN	NA	NA	NA	NA	NA	NA	NA	NA	NA	NA
FER1L4	CCL28	NA	NA	GSTM3	NA	NA	NA	NA	NA	NA	NA	NA	NA	NA
FGD4	CCND1	NA	NA	GSTO1	NA	NA	NA	NA	NA	NA	NA	NA	NA	NA
FGF1	CCND2	NA	NA	GYS1	NA	NA	NA	NA	NA	NA	NA	NA	NA	NA
FHOD3	CCNDBP1	NA	NA	H6PD	NA	NA	NA	NA	NA	NA	NA	NA	NA	NA
FLT1	CD109	NA	NA	HCN2	NA	NA	NA	NA	NA	NA	NA	NA	NA	NA
FMN1	CD14	NA	NA	HDAC9	NA	NA	NA	NA	NA	NA	NA	NA	NA	NA
FMOD	CD151	NA	NA	HEATR5A	NA	NA	NA	NA	NA	NA	NA	NA	NA	NA
FNDC3B	CD163L1	NA	NA	HECW1	NA	NA	NA	NA	NA	NA	NA	NA	NA	NA
FNDC4	CD46	NA	NA	HECW2	NA	NA	NA	NA	NA	NA	NA	NA	NA	NA
FNIP2	CD55	NA	NA	HEXB	NA	NA	NA	NA	NA	NA	NA	NA	NA	NA
FOXC1	CD58	NA	NA	HHAT	NA	NA	NA	NA	NA	NA	NA	NA	NA	NA
FOXE1	CD59	NA	NA	HINT3	NA	NA	NA	NA	NA	NA	NA	NA	NA	NA
FRMD6	CD63	NA	NA	HIST1H2BK	NA	NA	NA	NA	NA	NA	NA	NA	NA	NA
FRS2	CD9	NA	NA	HIVEP1	NA	NA	NA	NA	NA	NA	NA	NA	NA	NA
FRY	CDC42BPB	NA	NA	HIVEP2	NA	NA	NA	NA	NA	NA	NA	NA	NA	NA
FSTL3	CDCP1	NA	NA	HK2	NA	NA	NA	NA	NA	NA	NA	NA	NA	NA
FZD6	CDH1	NA	NA	HLA-F	NA	NA	NA	NA	NA	NA	NA	NA	NA	NA
GADD45A	CDH10	NA	NA	HM13	NA	NA	NA	NA	NA	NA	NA	NA	NA	NA
GALNT10	CDH13	NA	NA	HSD17B14	NA	NA	NA	NA	NA	NA	NA	NA	NA	NA
GALNT5	CDH22	NA	NA	ICAM4	NA	NA	NA	NA	NA	NA	NA	NA	NA	NA
GARS	CDIPT	NA	NA	ICAM5	NA	NA	NA	NA	NA	NA	NA	NA	NA	NA
GAS6	CDK6	NA	NA	IDS	NA	NA	NA	NA	NA	NA	NA	NA	NA	NA
GATA3	CDKL3	NA	NA	IDUA	NA	NA	NA	NA	NA	NA	NA	NA	NA	NA
GBE1	CDKL4	NA	NA	IFI27L2	NA	NA	NA	NA	NA	NA	NA	NA	NA	NA
GBP3	CDKN1A	NA	NA	IFI30	NA	NA	NA	NA	NA	NA	NA	NA	NA	NA
GCNT2	CDKN2A	NA	NA	IFI6	NA	NA	NA	NA	NA	NA	NA	NA	NA	NA
GCNT4	CDKN2B	NA	NA	IGDCC4	NA	NA	NA	NA	NA	NA	NA	NA	NA	NA
GDF15	CDNF	NA	NA	IGF2R	NA	NA	NA	NA	NA	NA	NA	NA	NA	NA
GDF6	CDYL2	NA	NA	IGFBP7	NA	NA	NA	NA	NA	NA	NA	NA	NA	NA
GDPD1	CELF2	NA	NA	IL32	NA	NA	NA	NA	NA	NA	NA	NA	NA	NA
GFPT1	CENPT	NA	NA	IL6	NA	NA	NA	NA	NA	NA	NA	NA	NA	NA
GGCX	CERCAM	NA	NA	INA	NA	NA	NA	NA	NA	NA	NA	NA	NA	NA
GIPC1	CES2	NA	NA	INHBB	NA	NA	NA	NA	NA	NA	NA	NA	NA	NA
GK5	CES4A	NA	NA	INPP5A	NA	NA	NA	NA	NA	NA	NA	NA	NA	NA
GLT6D1	CFD	NA	NA	ITGAV	NA	NA	NA	NA	NA	NA	NA	NA	NA	NA
GOLGB1	CFL2	NA	NA	ITGB5	NA	NA	NA	NA	NA	NA	NA	NA	NA	NA
GOPC	CFLAR	NA	NA	ITPR2	NA	NA	NA	NA	NA	NA	NA	NA	NA	NA
GPC1	CGREF1	NA	NA	ITPRIPL2	NA	NA	NA	NA	NA	NA	NA	NA	NA	NA
GPR108	CHIC2	NA	NA	KCNH1	NA	NA	NA	NA	NA	NA	NA	NA	NA	NA
GPR137B	CHMP4C	NA	NA	KCNK6	NA	NA	NA	NA	NA	NA	NA	NA	NA	NA
GPR155	CHPF	NA	NA	KCNN2	NA	NA	NA	NA	NA	NA	NA	NA	NA	NA
GPR176	CHRDL2	NA	NA	KCTD11	NA	NA	NA	NA	NA	NA	NA	NA	NA	NA
GRAMD1B	CHRNA1	NA	NA	KCTD16	NA	NA	NA	NA	NA	NA	NA	NA	NA	NA
GRIK2	CHST11	NA	NA	KCTD4	NA	NA	NA	NA	NA	NA	NA	NA	NA	NA
GRINA	CHST2	NA	NA	KDELR3	NA	NA	NA	NA	NA	NA	NA	NA	NA	NA
GSN	CITED2	NA	NA	KIAA1324	NA	NA	NA	NA	NA	NA	NA	NA	NA	NA
GSTM3	CLCN5	NA	NA	KIRREL3	NA	NA	NA	NA	NA	NA	NA	NA	NA	NA
GSTO1	CLCNKA	NA	NA	KIT	NA	NA	NA	NA	NA	NA	NA	NA	NA	NA
GYG1	CLDN1	NA	NA	KLHL36	NA	NA	NA	NA	NA	NA	NA	NA	NA	NA
GYS1	CLDN16	NA	NA	KRTAP4-2	NA	NA	NA	NA	NA	NA	NA	NA	NA	NA
H6PD	CLEC4G	NA	NA	KRTAP4-4	NA	NA	NA	NA	NA	NA	NA	NA	NA	NA
HCFC2	CLIC3	NA	NA	L1CAM	NA	NA	NA	NA	NA	NA	NA	NA	NA	NA
HCN2	CLIC4	NA	NA	LAMA1	NA	NA	NA	NA	NA	NA	NA	NA	NA	NA
HDAC9	CLN5	NA	NA	LAMB2	NA	NA	NA	NA	NA	NA	NA	NA	NA	NA
HEATR5A	CLN8	NA	NA	LAMC1	NA	NA	NA	NA	NA	NA	NA	NA	NA	NA
HECW1	CLPTM1L	NA	NA	LAMC2	NA	NA	NA	NA	NA	NA	NA	NA	NA	NA
HECW2	CLSTN2	NA	NA	LAMP2	NA	NA	NA	NA	NA	NA	NA	NA	NA	NA
HEXB	CLTB	NA	NA	LCE2A	NA	NA	NA	NA	NA	NA	NA	NA	NA	NA
HHAT	CLTCL1	NA	NA	LCE2B	NA	NA	NA	NA	NA	NA	NA	NA	NA	NA
HINT3	CMBL	NA	NA	LCE2C	NA	NA	NA	NA	NA	NA	NA	NA	NA	NA
HIST1H2BK	CMIP	NA	NA	LGR4	NA	NA	NA	NA	NA	NA	NA	NA	NA	NA
HIVEP1	CMKLR1	NA	NA	LIMK2	NA	NA	NA	NA	NA	NA	NA	NA	NA	NA
HIVEP2	CMPK1	NA	NA	LIPH	NA	NA	NA	NA	NA	NA	NA	NA	NA	NA
HK2	CMTM4	NA	NA	LMO7	NA	NA	NA	NA	NA	NA	NA	NA	NA	NA
HLA-F	CNIH3	NA	NA	LNPEP	NA	NA	NA	NA	NA	NA	NA	NA	NA	NA
HM13	CNNM1	NA	NA	LOC389834	NA	NA	NA	NA	NA	NA	NA	NA	NA	NA
HSD17B14	CNTN1	NA	NA	LOX	NA	NA	NA	NA	NA	NA	NA	NA	NA	NA
HSPA4L	COBLL1	NA	NA	LOXL4	NA	NA	NA	NA	NA	NA	NA	NA	NA	NA
ICAM4	COG6	NA	NA	LPCAT2	NA	NA	NA	NA	NA	NA	NA	NA	NA	NA
ICAM5	COL10A1	NA	NA	LPXN	NA	NA	NA	NA	NA	NA	NA	NA	NA	NA
IDS	COL11A1	NA	NA	LRP10	NA	NA	NA	NA	NA	NA	NA	NA	NA	NA
IDUA	COL25A1	NA	NA	LRRC17	NA	NA	NA	NA	NA	NA	NA	NA	NA	NA
IFI27L2	COL2A1	NA	NA	LRRFIP1	NA	NA	NA	NA	NA	NA	NA	NA	NA	NA
IFI30	COL4A3BP	NA	NA	LRRN3	NA	NA	NA	NA	NA	NA	NA	NA	NA	NA
IFI6	COL4A5	NA	NA	LTBP1	NA	NA	NA	NA	NA	NA	NA	NA	NA	NA
IFIT3	COL4A6	NA	NA	LUZP1	NA	NA	NA	NA	NA	NA	NA	NA	NA	NA
IGDCC4	COL5A1	NA	NA	LYSMD3	NA	NA	NA	NA	NA	NA	NA	NA	NA	NA
IGF2R	COL8A1	NA	NA	MACF1	NA	NA	NA	NA	NA	NA	NA	NA	NA	NA
IGFBP7	COL8A2	NA	NA	MAFF	NA	NA	NA	NA	NA	NA	NA	NA	NA	NA
IKBIP	COMP	NA	NA	MAMDC2	NA	NA	NA	NA	NA	NA	NA	NA	NA	NA
IL1A	COPZ2	NA	NA	MAN1B1	NA	NA	NA	NA	NA	NA	NA	NA	NA	NA
IL32	COQ10B	NA	NA	MAN2A1	NA	NA	NA	NA	NA	NA	NA	NA	NA	NA
IL6	COX7A1	NA	NA	MAST4	NA	NA	NA	NA	NA	NA	NA	NA	NA	NA
INA	CPE	NA	NA	MCFD2	NA	NA	NA	NA	NA	NA	NA	NA	NA	NA
INHBB	CPEB2	NA	NA	MCTP2	NA	NA	NA	NA	NA	NA	NA	NA	NA	NA
INPP5A	CPEB4	NA	NA	MDM2	NA	NA	NA	NA	NA	NA	NA	NA	NA	NA
IRAK2	CPNE3	NA	NA	MFAP2	NA	NA	NA	NA	NA	NA	NA	NA	NA	NA
IRAK4	CPPED1	NA	NA	MFAP5	NA	NA	NA	NA	NA	NA	NA	NA	NA	NA
ITGAV	CRAT	NA	NA	MFSD1	NA	NA	NA	NA	NA	NA	NA	NA	NA	NA
ITGB5	CREB3	NA	NA	MFSD3	NA	NA	NA	NA	NA	NA	NA	NA	NA	NA
ITPR2	CREG1	NA	NA	MGAT5	NA	NA	NA	NA	NA	NA	NA	NA	NA	NA
ITPRIPL2	CRELD1	NA	NA	MGLL	NA	NA	NA	NA	NA	NA	NA	NA	NA	NA
JAZF1	CRIP2	NA	NA	MICA	NA	NA	NA	NA	NA	NA	NA	NA	NA	NA
KCNG1	CRNN	NA	NA	MINK1	NA	NA	NA	NA	NA	NA	NA	NA	NA	NA
KCNH1	CRTAC1	NA	NA	MLLT11	NA	NA	NA	NA	NA	NA	NA	NA	NA	NA
KCNK6	CRYL1	NA	NA	MOGS	NA	NA	NA	NA	NA	NA	NA	NA	NA	NA
KCNN2	CSF2	NA	NA	MPZL1	NA	NA	NA	NA	NA	NA	NA	NA	NA	NA
KCTD11	CSF2RB	NA	NA	MR1	NA	NA	NA	NA	NA	NA	NA	NA	NA	NA
KCTD16	CSGALNACT1	NA	NA	MRAS	NA	NA	NA	NA	NA	NA	NA	NA	NA	NA
KCTD4	CSGALNACT2	NA	NA	MSRB3	NA	NA	NA	NA	NA	NA	NA	NA	NA	NA
KDELR3	CSPG5	NA	NA	MTSS1	NA	NA	NA	NA	NA	NA	NA	NA	NA	NA
KIAA0355	CST1	NA	NA	MXD1	NA	NA	NA	NA	NA	NA	NA	NA	NA	NA
KIAA1324	CST2	NA	NA	MXRA5	NA	NA	NA	NA	NA	NA	NA	NA	NA	NA
KIRREL3	CST3	NA	NA	MYO6	NA	NA	NA	NA	NA	NA	NA	NA	NA	NA
KIT	CST5	NA	NA	NAALADL2	NA	NA	NA	NA	NA	NA	NA	NA	NA	NA
KLHL36	CST9L	NA	NA	NADSYN1	NA	NA	NA	NA	NA	NA	NA	NA	NA	NA
KLHL5	CTBS	NA	NA	NAPB	NA	NA	NA	NA	NA	NA	NA	NA	NA	NA
KLHL7	CTGF	NA	NA	NAV1	NA	NA	NA	NA	NA	NA	NA	NA	NA	NA
KRTAP4-2	CTSD	NA	NA	NBEAL1	NA	NA	NA	NA	NA	NA	NA	NA	NA	NA
KRTAP4-4	CTSO	NA	NA	NCF2	NA	NA	NA	NA	NA	NA	NA	NA	NA	NA
L1CAM	CTSZ	NA	NA	NCOA3	NA	NA	NA	NA	NA	NA	NA	NA	NA	NA
LAMA1	CTTN	NA	NA	NCOA7	NA	NA	NA	NA	NA	NA	NA	NA	NA	NA
LAMB2	CTTNBP2NL	NA	NA	NDEL1	NA	NA	NA	NA	NA	NA	NA	NA	NA	NA
LAMC1	CUBN	NA	NA	NDFIP2	NA	NA	NA	NA	NA	NA	NA	NA	NA	NA
LAMC2	CXADR	NA	NA	NDUFA1	NA	NA	NA	NA	NA	NA	NA	NA	NA	NA
LAMP2	CXCL10	NA	NA	NEDD4L	NA	NA	NA	NA	NA	NA	NA	NA	NA	NA
LCE2A	CXCR4	NA	NA	NEDD9	NA	NA	NA	NA	NA	NA	NA	NA	NA	NA
LCE2B	CYB5D2	NA	NA	NEGR1	NA	NA	NA	NA	NA	NA	NA	NA	NA	NA
LCE2C	CYB5R1	NA	NA	NEO1	NA	NA	NA	NA	NA	NA	NA	NA	NA	NA
LGR4	CYBA	NA	NA	NEXN	NA	NA	NA	NA	NA	NA	NA	NA	NA	NA
LHCGR	CYBRD1	NA	NA	NFAT5	NA	NA	NA	NA	NA	NA	NA	NA	NA	NA
LIMK2	CYFIP2	NA	NA	NFE2L3	NA	NA	NA	NA	NA	NA	NA	NA	NA	NA
LIPH	CYHR1	NA	NA	NFKBIZ	NA	NA	NA	NA	NA	NA	NA	NA	NA	NA
LMO7	CYP2E1	NA	NA	NIPAL2	NA	NA	NA	NA	NA	NA	NA	NA	NA	NA
LNPEP	CYP2S1	NA	NA	NIPAL3	NA	NA	NA	NA	NA	NA	NA	NA	NA	NA
LOC389834	CYP2U1	NA	NA	NLRP10	NA	NA	NA	NA	NA	NA	NA	NA	NA	NA
LOX	CYR61	NA	NA	NMNAT2	NA	NA	NA	NA	NA	NA	NA	NA	NA	NA
LOXL3	CYS1	NA	NA	NOTCH3	NA	NA	NA	NA	NA	NA	NA	NA	NA	NA
LOXL4	DAAM1	NA	NA	NOX4	NA	NA	NA	NA	NA	NA	NA	NA	NA	NA
LPCAT2	DACT1	NA	NA	NPAS2	NA	NA	NA	NA	NA	NA	NA	NA	NA	NA
LPXN	DAG1	NA	NA	NPDC1	NA	NA	NA	NA	NA	NA	NA	NA	NA	NA
LRP10	DAGLB	NA	NA	NRBP2	NA	NA	NA	NA	NA	NA	NA	NA	NA	NA
LRRC17	DAP	NA	NA	NRG1	NA	NA	NA	NA	NA	NA	NA	NA	NA	NA
LRRC2	DCAF6	NA	NA	NTF3	NA	NA	NA	NA	NA	NA	NA	NA	NA	NA
LRRFIP1	DCLK1	NA	NA	NTM	NA	NA	NA	NA	NA	NA	NA	NA	NA	NA
LRRN3	DCTN1	NA	NA	OGFRL1	NA	NA	NA	NA	NA	NA	NA	NA	NA	NA
LTBP1	DCTN6	NA	NA	OPHN1	NA	NA	NA	NA	NA	NA	NA	NA	NA	NA
LUZP1	DCUN1D3	NA	NA	OPTN	NA	NA	NA	NA	NA	NA	NA	NA	NA	NA
LY96	DDA1	NA	NA	OR5B21	NA	NA	NA	NA	NA	NA	NA	NA	NA	NA
LYSMD3	DDAH1	NA	NA	OSBPL3	NA	NA	NA	NA	NA	NA	NA	NA	NA	NA
MACF1	DDR1	NA	NA	OSR2	NA	NA	NA	NA	NA	NA	NA	NA	NA	NA
MAFF	DDR2	NA	NA	OSTC	NA	NA	NA	NA	NA	NA	NA	NA	NA	NA
MAMDC2	DDRGK1	NA	NA	OSTM1	NA	NA	NA	NA	NA	NA	NA	NA	NA	NA
MAN1B1	DDX58	NA	NA	OTUB2	NA	NA	NA	NA	NA	NA	NA	NA	NA	NA
MAN2A1	DEDD2	NA	NA	P4HA1	NA	NA	NA	NA	NA	NA	NA	NA	NA	NA
MAST4	DENND2C	NA	NA	P4HA2	NA	NA	NA	NA	NA	NA	NA	NA	NA	NA
MCFD2	DGAT2	NA	NA	PAG1	NA	NA	NA	NA	NA	NA	NA	NA	NA	NA
MCTP2	DGKA	NA	NA	PAMR1	NA	NA	NA	NA	NA	NA	NA	NA	NA	NA
MDM2	DGKI	NA	NA	PCDHB10	NA	NA	NA	NA	NA	NA	NA	NA	NA	NA
MFAP2	DHCR7	NA	NA	PCDHB11	NA	NA	NA	NA	NA	NA	NA	NA	NA	NA
MFAP3	DHDH	NA	NA	PCDHB13	NA	NA	NA	NA	NA	NA	NA	NA	NA	NA
MFAP5	DHRS1	NA	NA	PCDHB14	NA	NA	NA	NA	NA	NA	NA	NA	NA	NA
MFSD1	DHRS12	NA	NA	PCDHB15	NA	NA	NA	NA	NA	NA	NA	NA	NA	NA
MFSD3	DHRS7	NA	NA	PCDHB16	NA	NA	NA	NA	NA	NA	NA	NA	NA	NA
MGAT5	DHRS7B	NA	NA	PCDHB8	NA	NA	NA	NA	NA	NA	NA	NA	NA	NA
MGLL	DIRC2	NA	NA	PCDHB9	NA	NA	NA	NA	NA	NA	NA	NA	NA	NA
MICA	DIXDC1	NA	NA	PCYT1A	NA	NA	NA	NA	NA	NA	NA	NA	NA	NA
MICAL2	DKK2	NA	NA	PDCD1LG2	NA	NA	NA	NA	NA	NA	NA	NA	NA	NA
MINK1	DKK3	NA	NA	PDCD4	NA	NA	NA	NA	NA	NA	NA	NA	NA	NA
MLLT11	DLL1	NA	NA	PDLIM5	NA	NA	NA	NA	NA	NA	NA	NA	NA	NA
MMP17	DMD	NA	NA	PEA15	NA	NA	NA	NA	NA	NA	NA	NA	NA	NA
MMP2	DMPK	NA	NA	PGM5	NA	NA	NA	NA	NA	NA	NA	NA	NA	NA
MOGS	DMRTA1	NA	NA	PHLDA3	NA	NA	NA	NA	NA	NA	NA	NA	NA	NA
MPZL1	DNAH1	NA	NA	PIK3C3	NA	NA	NA	NA	NA	NA	NA	NA	NA	NA
MR1	DNAJB4	NA	NA	PIK3IP1	NA	NA	NA	NA	NA	NA	NA	NA	NA	NA
MRAS	DNAJB6	NA	NA	PITPNM3	NA	NA	NA	NA	NA	NA	NA	NA	NA	NA
MSRB3	DNAJB9	NA	NA	PLA2G15	NA	NA	NA	NA	NA	NA	NA	NA	NA	NA
MTSS1	DNAJC1	NA	NA	PLA2G16	NA	NA	NA	NA	NA	NA	NA	NA	NA	NA
MXD1	DNAJC6	NA	NA	PLA2G4C	NA	NA	NA	NA	NA	NA	NA	NA	NA	NA
MXRA5	DNASE1L1	NA	NA	PLAT	NA	NA	NA	NA	NA	NA	NA	NA	NA	NA
MYO6	DNER	NA	NA	PLCB4	NA	NA	NA	NA	NA	NA	NA	NA	NA	NA
NAALADL2	DOCK9	NA	NA	PLEKHA1	NA	NA	NA	NA	NA	NA	NA	NA	NA	NA
NADSYN1	DOK1	NA	NA	PLK3	NA	NA	NA	NA	NA	NA	NA	NA	NA	NA
NAPB	DOK7	NA	NA	PLOD2	NA	NA	NA	NA	NA	NA	NA	NA	NA	NA
NAV1	DPH3	NA	NA	PLXNA3	NA	NA	NA	NA	NA	NA	NA	NA	NA	NA
NBEAL1	DPP7	NA	NA	PMAIP1	NA	NA	NA	NA	NA	NA	NA	NA	NA	NA
NCF2	DRAM1	NA	NA	POLD4	NA	NA	NA	NA	NA	NA	NA	NA	NA	NA
NCOA3	DRP2	NA	NA	PORCN	NA	NA	NA	NA	NA	NA	NA	NA	NA	NA
NCOA7	DSP	NA	NA	PPFIBP1	NA	NA	NA	NA	NA	NA	NA	NA	NA	NA
NDEL1	DUSP1	NA	NA	PPFIBP2	NA	NA	NA	NA	NA	NA	NA	NA	NA	NA
NDFIP2	DUSP23	NA	NA	PPM1K	NA	NA	NA	NA	NA	NA	NA	NA	NA	NA
NDUFA1	DUSP3	NA	NA	PPP1R3C	NA	NA	NA	NA	NA	NA	NA	NA	NA	NA
NEDD4L	DUSP6	NA	NA	PPP2R5B	NA	NA	NA	NA	NA	NA	NA	NA	NA	NA
NEDD9	DYNC1I1	NA	NA	PRDM1	NA	NA	NA	NA	NA	NA	NA	NA	NA	NA
NEGR1	DYNC1LI2	NA	NA	PRDX5	NA	NA	NA	NA	NA	NA	NA	NA	NA	NA
NEK10	DYNLT3	NA	NA	PRDX6	NA	NA	NA	NA	NA	NA	NA	NA	NA	NA
NEO1	DYRK1B	NA	NA	PRNP	NA	NA	NA	NA	NA	NA	NA	NA	NA	NA
NETO1	DYSF	NA	NA	PSG1	NA	NA	NA	NA	NA	NA	NA	NA	NA	NA
NEXN	EBI3	NA	NA	PSG2	NA	NA	NA	NA	NA	NA	NA	NA	NA	NA
NFAT5	ECM1	NA	NA	PSG3	NA	NA	NA	NA	NA	NA	NA	NA	NA	NA
NFE2L3	EDA2R	NA	NA	PSTPIP2	NA	NA	NA	NA	NA	NA	NA	NA	NA	NA
NFKB1	EDEM3	NA	NA	PTGFR	NA	NA	NA	NA	NA	NA	NA	NA	NA	NA
NFKB2	EDIL3	NA	NA	PTGIR	NA	NA	NA	NA	NA	NA	NA	NA	NA	NA
NFKBIE	EDN1	NA	NA	PTPN13	NA	NA	NA	NA	NA	NA	NA	NA	NA	NA
NFKBIZ	EEF1A2	NA	NA	PURA	NA	NA	NA	NA	NA	NA	NA	NA	NA	NA
NIPAL2	EFEMP2	NA	NA	QPCT	NA	NA	NA	NA	NA	NA	NA	NA	NA	NA
NIPAL3	EFHD1	NA	NA	QPRT	NA	NA	NA	NA	NA	NA	NA	NA	NA	NA
NKX2-6	EFNA3	NA	NA	RAB11FIP5	NA	NA	NA	NA	NA	NA	NA	NA	NA	NA
NLGN1	EFNA5	NA	NA	RAB5A	NA	NA	NA	NA	NA	NA	NA	NA	NA	NA
NLRP10	EGF	NA	NA	RAI14	NA	NA	NA	NA	NA	NA	NA	NA	NA	NA
NMNAT2	EGLN1	NA	NA	RAPH1	NA	NA	NA	NA	NA	NA	NA	NA	NA	NA
NOTCH3	EGLN3	NA	NA	RASA2	NA	NA	NA	NA	NA	NA	NA	NA	NA	NA
NOX4	EGR2	NA	NA	RASGRP1	NA	NA	NA	NA	NA	NA	NA	NA	NA	NA
NPAS2	EHF	NA	NA	RBM24	NA	NA	NA	NA	NA	NA	NA	NA	NA	NA
NPDC1	EIF4EBP2	NA	NA	RDH10	NA	NA	NA	NA	NA	NA	NA	NA	NA	NA
NRBP2	EIF5A2	NA	NA	RECK	NA	NA	NA	NA	NA	NA	NA	NA	NA	NA
NRG1	ELFN1	NA	NA	REEP2	NA	NA	NA	NA	NA	NA	NA	NA	NA	NA
NTF3	ELMOD1	NA	NA	REN	NA	NA	NA	NA	NA	NA	NA	NA	NA	NA
NTM	EME2	NA	NA	RFTN1	NA	NA	NA	NA	NA	NA	NA	NA	NA	NA
OGFRL1	ENC1	NA	NA	RGS5	NA	NA	NA	NA	NA	NA	NA	NA	NA	NA
OPHN1	ENPP4	NA	NA	RGS9	NA	NA	NA	NA	NA	NA	NA	NA	NA	NA
OPTN	EPB41L1	NA	NA	RHBDF2	NA	NA	NA	NA	NA	NA	NA	NA	NA	NA
OR2L2	EPB42	NA	NA	RHOC	NA	NA	NA	NA	NA	NA	NA	NA	NA	NA
OR5B21	EPHA2	NA	NA	RHOQ	NA	NA	NA	NA	NA	NA	NA	NA	NA	NA
OSBPL3	EPHA8	NA	NA	RIN2	NA	NA	NA	NA	NA	NA	NA	NA	NA	NA
OSR2	EPHX4	NA	NA	RIOK3	NA	NA	NA	NA	NA	NA	NA	NA	NA	NA
OSTC	EPS8L2	NA	NA	RIT1	NA	NA	NA	NA	NA	NA	NA	NA	NA	NA
OSTM1	ERLEC1	NA	NA	RNF144B	NA	NA	NA	NA	NA	NA	NA	NA	NA	NA
OTUB2	ERMAP	NA	NA	RNF150	NA	NA	NA	NA	NA	NA	NA	NA	NA	NA
P4HA1	ERP44	NA	NA	RPS27L	NA	NA	NA	NA	NA	NA	NA	NA	NA	NA
P4HA2	ERRFI1	NA	NA	RRM2B	NA	NA	NA	NA	NA	NA	NA	NA	NA	NA
PAG1	ETHE1	NA	NA	RSPH3	NA	NA	NA	NA	NA	NA	NA	NA	NA	NA
PAMR1	ETNK2	NA	NA	SAMD12	NA	NA	NA	NA	NA	NA	NA	NA	NA	NA
PARP8	ETV5	NA	NA	SAMD4A	NA	NA	NA	NA	NA	NA	NA	NA	NA	NA
PCBP4	EVC	NA	NA	SAMD9L	NA	NA	NA	NA	NA	NA	NA	NA	NA	NA
PCDHB10	EVI5	NA	NA	SAT1	NA	NA	NA	NA	NA	NA	NA	NA	NA	NA
PCDHB11	EVI5L	NA	NA	SCD5	NA	NA	NA	NA	NA	NA	NA	NA	NA	NA
PCDHB13	EXD2	NA	NA	SCN8A	NA	NA	NA	NA	NA	NA	NA	NA	NA	NA
PCDHB14	EXPH5	NA	NA	SCUBE3	NA	NA	NA	NA	NA	NA	NA	NA	NA	NA
PCDHB15	EXTL1	NA	NA	SEC14L1	NA	NA	NA	NA	NA	NA	NA	NA	NA	NA
PCDHB16	F2RL1	NA	NA	SEMA3C	NA	NA	NA	NA	NA	NA	NA	NA	NA	NA
PCDHB7	F2RL2	NA	NA	SEMA5A	NA	NA	NA	NA	NA	NA	NA	NA	NA	NA
PCDHB8	F3	NA	NA	SEMA6A	NA	NA	NA	NA	NA	NA	NA	NA	NA	NA
PCDHB9	F8	NA	NA	SEMA6D	NA	NA	NA	NA	NA	NA	NA	NA	NA	NA
PCYT1A	FABP3	NA	NA	SERINC2	NA	NA	NA	NA	NA	NA	NA	NA	NA	NA
PDCD1LG2	FADS3	NA	NA	SERINC3	NA	NA	NA	NA	NA	NA	NA	NA	NA	NA
PDCD4	FAM107A	NA	NA	SERPINA9	NA	NA	NA	NA	NA	NA	NA	NA	NA	NA
PDHB	FAM129B	NA	NA	SERPINB8	NA	NA	NA	NA	NA	NA	NA	NA	NA	NA
PDLIM4	FAM129C	NA	NA	SERPINE1	NA	NA	NA	NA	NA	NA	NA	NA	NA	NA
PDLIM5	FAM13B	NA	NA	SERPINE2	NA	NA	NA	NA	NA	NA	NA	NA	NA	NA
PEA15	FAM151B	NA	NA	SERTAD4	NA	NA	NA	NA	NA	NA	NA	NA	NA	NA
PGM3	FAM162A	NA	NA	SESN1	NA	NA	NA	NA	NA	NA	NA	NA	NA	NA
PGM5	FAM167A	NA	NA	SETD7	NA	NA	NA	NA	NA	NA	NA	NA	NA	NA
PHLDA2	FAM174A	NA	NA	SFXN3	NA	NA	NA	NA	NA	NA	NA	NA	NA	NA
PHLDA3	FAM187B	NA	NA	SGIP1	NA	NA	NA	NA	NA	NA	NA	NA	NA	NA
PIK3C3	FAM198B	NA	NA	SGK1	NA	NA	NA	NA	NA	NA	NA	NA	NA	NA
PIK3IP1	FAM3C	NA	NA	SGMS2	NA	NA	NA	NA	NA	NA	NA	NA	NA	NA
PITPNM3	FAM43A	NA	NA	SGTB	NA	NA	NA	NA	NA	NA	NA	NA	NA	NA
PKD2	FAM50B	NA	NA	SH3BGRL2	NA	NA	NA	NA	NA	NA	NA	NA	NA	NA
PLA2G15	FAM71F1	NA	NA	SH3GLB1	NA	NA	NA	NA	NA	NA	NA	NA	NA	NA
PLA2G16	FAM71F2	NA	NA	SH3PXD2A	NA	NA	NA	NA	NA	NA	NA	NA	NA	NA
PLA2G4C	FAM8A1	NA	NA	SH3RF1	NA	NA	NA	NA	NA	NA	NA	NA	NA	NA
PLAT	FANK1	NA	NA	SH3TC2	NA	NA	NA	NA	NA	NA	NA	NA	NA	NA
PLCB4	FAP	NA	NA	SHANK1	NA	NA	NA	NA	NA	NA	NA	NA	NA	NA
PLEKHA1	FAR2	NA	NA	SHC3	NA	NA	NA	NA	NA	NA	NA	NA	NA	NA
PLEKHF2	FAS	NA	NA	SHOX2	NA	NA	NA	NA	NA	NA	NA	NA	NA	NA
PLK3	FAT1	NA	NA	SHROOM3	NA	NA	NA	NA	NA	NA	NA	NA	NA	NA
PLOD2	FBN1	NA	NA	SIL1	NA	NA	NA	NA	NA	NA	NA	NA	NA	NA
PLXNA3	FBN2	NA	NA	SLC12A4	NA	NA	NA	NA	NA	NA	NA	NA	NA	NA
PMAIP1	FBXL16	NA	NA	SLC17A5	NA	NA	NA	NA	NA	NA	NA	NA	NA	NA
POLD4	FBXL2	NA	NA	SLC1A1	NA	NA	NA	NA	NA	NA	NA	NA	NA	NA
PORCN	FBXO2	NA	NA	SLC20A2	NA	NA	NA	NA	NA	NA	NA	NA	NA	NA
PPFIBP1	FBXO9	NA	NA	SLC22A18	NA	NA	NA	NA	NA	NA	NA	NA	NA	NA
PPFIBP2	FBXW4	NA	NA	SLC22A4	NA	NA	NA	NA	NA	NA	NA	NA	NA	NA
PPM1K	FCGRT	NA	NA	SLC22A5	NA	NA	NA	NA	NA	NA	NA	NA	NA	NA
PPP1R3C	FCHSD1	NA	NA	SLC25A20	NA	NA	NA	NA	NA	NA	NA	NA	NA	NA
PPP2R5B	FCHSD2	NA	NA	SLC2A13	NA	NA	NA	NA	NA	NA	NA	NA	NA	NA
PRDM1	FER1L4	NA	NA	SLC2A14	NA	NA	NA	NA	NA	NA	NA	NA	NA	NA
PRDX5	FGD4	NA	NA	SLC30A4	NA	NA	NA	NA	NA	NA	NA	NA	NA	NA
PRDX6	FGF11	NA	NA	SLC31A2	NA	NA	NA	NA	NA	NA	NA	NA	NA	NA
PREPL	FGF2	NA	NA	SLC33A1	NA	NA	NA	NA	NA	NA	NA	NA	NA	NA
PRNP	FHDC1	NA	NA	SLC35B3	NA	NA	NA	NA	NA	NA	NA	NA	NA	NA
PSG1	FHL2	NA	NA	SLC35F5	NA	NA	NA	NA	NA	NA	NA	NA	NA	NA
PSG2	FHOD3	NA	NA	SLC36A1	NA	NA	NA	NA	NA	NA	NA	NA	NA	NA
PSG3	FIBCD1	NA	NA	SLC39A13	NA	NA	NA	NA	NA	NA	NA	NA	NA	NA
PSTPIP2	FIBIN	NA	NA	SLC39A6	NA	NA	NA	NA	NA	NA	NA	NA	NA	NA
PTGFR	FILIP1L	NA	NA	SLC41A2	NA	NA	NA	NA	NA	NA	NA	NA	NA	NA
PTGIR	FKBP1A	NA	NA	SLC46A3	NA	NA	NA	NA	NA	NA	NA	NA	NA	NA
PTPN13	FKBP1B	NA	NA	SLC7A5	NA	NA	NA	NA	NA	NA	NA	NA	NA	NA
PTX3	FKBP8	NA	NA	SLC9A3R2	NA	NA	NA	NA	NA	NA	NA	NA	NA	NA
PURA	FKBP9	NA	NA	SLC9A7	NA	NA	NA	NA	NA	NA	NA	NA	NA	NA
QPCT	FLNB	NA	NA	SMURF2	NA	NA	NA	NA	NA	NA	NA	NA	NA	NA
QPRT	FLT1	NA	NA	SP100	NA	NA	NA	NA	NA	NA	NA	NA	NA	NA
RAB11FIP5	FLYWCH1	NA	NA	SPARC	NA	NA	NA	NA	NA	NA	NA	NA	NA	NA
RAB5A	FMN1	NA	NA	SPATA18	NA	NA	NA	NA	NA	NA	NA	NA	NA	NA
RAI14	FMOD	NA	NA	SPOCK1	NA	NA	NA	NA	NA	NA	NA	NA	NA	NA
RANBP17	FN3K	NA	NA	SPTAN1	NA	NA	NA	NA	NA	NA	NA	NA	NA	NA
RAPH1	FNDC1	NA	NA	SRGN	NA	NA	NA	NA	NA	NA	NA	NA	NA	NA
RASA2	FNDC3B	NA	NA	SRPX2	NA	NA	NA	NA	NA	NA	NA	NA	NA	NA
RASGRP1	FNDC4	NA	NA	STARD4	NA	NA	NA	NA	NA	NA	NA	NA	NA	NA
RASGRP3	FOXA1	NA	NA	STIM1	NA	NA	NA	NA	NA	NA	NA	NA	NA	NA
RBM24	FOXE1	NA	NA	STK10	NA	NA	NA	NA	NA	NA	NA	NA	NA	NA
RDH10	FOXJ1	NA	NA	STX12	NA	NA	NA	NA	NA	NA	NA	NA	NA	NA
RECK	FPR3	NA	NA	STX3	NA	NA	NA	NA	NA	NA	NA	NA	NA	NA
REEP2	FRMD3	NA	NA	STX4	NA	NA	NA	NA	NA	NA	NA	NA	NA	NA
RELB	FRMD6	NA	NA	STXBP6	NA	NA	NA	NA	NA	NA	NA	NA	NA	NA
REN	FRY	NA	NA	SVIL	NA	NA	NA	NA	NA	NA	NA	NA	NA	NA
RFTN1	FSCN2	NA	NA	SYNGR2	NA	NA	NA	NA	NA	NA	NA	NA	NA	NA
RFTN2	FSTL3	NA	NA	TAF13	NA	NA	NA	NA	NA	NA	NA	NA	NA	NA
RGS5	FUCA1	NA	NA	TBC1D2	NA	NA	NA	NA	NA	NA	NA	NA	NA	NA
RGS9	FZD6	NA	NA	TBC1D4	NA	NA	NA	NA	NA	NA	NA	NA	NA	NA
RHBDF2	GAA	NA	NA	TBC1D8B	NA	NA	NA	NA	NA	NA	NA	NA	NA	NA
RHOC	GABARAPL1	NA	NA	TCP11L1	NA	NA	NA	NA	NA	NA	NA	NA	NA	NA
RHOQ	GABBR2	NA	NA	TCTA	NA	NA	NA	NA	NA	NA	NA	NA	NA	NA
RIN2	GABRD	NA	NA	TEX2	NA	NA	NA	NA	NA	NA	NA	NA	NA	NA
RIOK3	GADD45A	NA	NA	TFAP2A	NA	NA	NA	NA	NA	NA	NA	NA	NA	NA
RIT1	GADD45B	NA	NA	TFEB	NA	NA	NA	NA	NA	NA	NA	NA	NA	NA
RNF144B	GALC	NA	NA	TG	NA	NA	NA	NA	NA	NA	NA	NA	NA	NA
RNF150	GALNT10	NA	NA	TGFBR2	NA	NA	NA	NA	NA	NA	NA	NA	NA	NA
RPS27L	GALNT11	NA	NA	TGM2	NA	NA	NA	NA	NA	NA	NA	NA	NA	NA
RPS6KC1	GALNT5	NA	NA	THY1	NA	NA	NA	NA	NA	NA	NA	NA	NA	NA
RRM2B	GALR2	NA	NA	TIAM1	NA	NA	NA	NA	NA	NA	NA	NA	NA	NA
RSPH3	GAMT	NA	NA	TIMP3	NA	NA	NA	NA	NA	NA	NA	NA	NA	NA
SAMD12	GAS2L2	NA	NA	TM6SF2	NA	NA	NA	NA	NA	NA	NA	NA	NA	NA
SAMD4A	GAS6	NA	NA	TMEM106A	NA	NA	NA	NA	NA	NA	NA	NA	NA	NA
SAMD9L	GATA3	NA	NA	TMEM117	NA	NA	NA	NA	NA	NA	NA	NA	NA	NA
SAT1	GATA6	NA	NA	TMEM131	NA	NA	NA	NA	NA	NA	NA	NA	NA	NA
SATB2	GBA	NA	NA	TMEM136	NA	NA	NA	NA	NA	NA	NA	NA	NA	NA
SCD5	GBE1	NA	NA	TMEM150A	NA	NA	NA	NA	NA	NA	NA	NA	NA	NA
SCN8A	GCC2	NA	NA	TMEM154	NA	NA	NA	NA	NA	NA	NA	NA	NA	NA
SCUBE3	GCKR	NA	NA	TMEM156	NA	NA	NA	NA	NA	NA	NA	NA	NA	NA
SEC14L1	GCNT2	NA	NA	TMEM200A	NA	NA	NA	NA	NA	NA	NA	NA	NA	NA
SEMA3C	GCNT4	NA	NA	TMEM217	NA	NA	NA	NA	NA	NA	NA	NA	NA	NA
SEMA5A	GDE1	NA	NA	TMEM9B	NA	NA	NA	NA	NA	NA	NA	NA	NA	NA
SEMA6A	GDF11	NA	NA	TNFAIP1	NA	NA	NA	NA	NA	NA	NA	NA	NA	NA
SEMA6D	GDF15	NA	NA	TNFRSF10B	NA	NA	NA	NA	NA	NA	NA	NA	NA	NA
SERINC2	GDF6	NA	NA	TNFRSF10D	NA	NA	NA	NA	NA	NA	NA	NA	NA	NA
SERINC3	GDI1	NA	NA	TNFSF18	NA	NA	NA	NA	NA	NA	NA	NA	NA	NA
SERPINA9	GDNF	NA	NA	TNFSF4	NA	NA	NA	NA	NA	NA	NA	NA	NA	NA
SERPINB8	GDPD1	NA	NA	TNIP1	NA	NA	NA	NA	NA	NA	NA	NA	NA	NA
SERPINE1	GDPD5	NA	NA	TOB1	NA	NA	NA	NA	NA	NA	NA	NA	NA	NA
SERPINE2	GFOD1	NA	NA	TP53INP1	NA	NA	NA	NA	NA	NA	NA	NA	NA	NA
SERTAD4	GFPT1	NA	NA	TPBG	NA	NA	NA	NA	NA	NA	NA	NA	NA	NA
SESN1	GHR	NA	NA	TPM1	NA	NA	NA	NA	NA	NA	NA	NA	NA	NA
SESN2	GIPC1	NA	NA	TPRG1L	NA	NA	NA	NA	NA	NA	NA	NA	NA	NA
SETD7	GJA5	NA	NA	TRAK1	NA	NA	NA	NA	NA	NA	NA	NA	NA	NA
SFXN3	GJB2	NA	NA	TRAK2	NA	NA	NA	NA	NA	NA	NA	NA	NA	NA
SGCZ	GK5	NA	NA	TRIM22	NA	NA	NA	NA	NA	NA	NA	NA	NA	NA
SGIP1	GLB1	NA	NA	TRIML2	NA	NA	NA	NA	NA	NA	NA	NA	NA	NA
SGK1	GLIPR1	NA	NA	TRPC1	NA	NA	NA	NA	NA	NA	NA	NA	NA	NA
SGMS2	GLRX	NA	NA	TRPC4	NA	NA	NA	NA	NA	NA	NA	NA	NA	NA
SGTB	GLS	NA	NA	TRPM4	NA	NA	NA	NA	NA	NA	NA	NA	NA	NA
SH3BGRL2	GLTP	NA	NA	TRPV2	NA	NA	NA	NA	NA	NA	NA	NA	NA	NA
SH3GLB1	GMIP	NA	NA	TSPAN13	NA	NA	NA	NA	NA	NA	NA	NA	NA	NA
SH3PXD2A	GNAI2	NA	NA	TSPAN14	NA	NA	NA	NA	NA	NA	NA	NA	NA	NA
SH3RF1	GNPTAB	NA	NA	TSPAN9	NA	NA	NA	NA	NA	NA	NA	NA	NA	NA
SH3TC2	GNPTG	NA	NA	TTC3	NA	NA	NA	NA	NA	NA	NA	NA	NA	NA
SHANK1	GOLGB1	NA	NA	TUBB2A	NA	NA	NA	NA	NA	NA	NA	NA	NA	NA
SHC3	GPLD1	NA	NA	UBL3	NA	NA	NA	NA	NA	NA	NA	NA	NA	NA
SHOX2	GPR1	NA	NA	UCHL1	NA	NA	NA	NA	NA	NA	NA	NA	NA	NA
SHROOM3	GPR107	NA	NA	UFM1	NA	NA	NA	NA	NA	NA	NA	NA	NA	NA
SIL1	GPR108	NA	NA	ULBP1	NA	NA	NA	NA	NA	NA	NA	NA	NA	NA
SIPA1L3	GPR132	NA	NA	UNC13B	NA	NA	NA	NA	NA	NA	NA	NA	NA	NA
SLC12A4	GPR137	NA	NA	USP53	NA	NA	NA	NA	NA	NA	NA	NA	NA	NA
SLC16A12	GPR137B	NA	NA	VAMP2	NA	NA	NA	NA	NA	NA	NA	NA	NA	NA
SLC16A4	GPR146	NA	NA	VAT1	NA	NA	NA	NA	NA	NA	NA	NA	NA	NA
SLC17A5	GPR151	NA	NA	VGLL3	NA	NA	NA	NA	NA	NA	NA	NA	NA	NA
SLC1A1	GPR155	NA	NA	WDR26	NA	NA	NA	NA	NA	NA	NA	NA	NA	NA
SLC20A2	GPR157	NA	NA	WDR41	NA	NA	NA	NA	NA	NA	NA	NA	NA	NA
SLC22A18	GPR35	NA	NA	WDR63	NA	NA	NA	NA	NA	NA	NA	NA	NA	NA
SLC22A4	GPR52	NA	NA	WDR66	NA	NA	NA	NA	NA	NA	NA	NA	NA	NA
SLC22A5	GPR6	NA	NA	WIPI1	NA	NA	NA	NA	NA	NA	NA	NA	NA	NA
SLC25A20	GPX3	NA	NA	WNT16	NA	NA	NA	NA	NA	NA	NA	NA	NA	NA
SLC2A13	GRAMD1B	NA	NA	WNT5A	NA	NA	NA	NA	NA	NA	NA	NA	NA	NA
SLC2A14	GRB2	NA	NA	WNT5B	NA	NA	NA	NA	NA	NA	NA	NA	NA	NA
SLC30A4	GREB1L	NA	NA	XDH	NA	NA	NA	NA	NA	NA	NA	NA	NA	NA
SLC31A2	GRK4	NA	NA	YPEL2	NA	NA	NA	NA	NA	NA	NA	NA	NA	NA
SLC33A1	GRN	NA	NA	ZBTB46	NA	NA	NA	NA	NA	NA	NA	NA	NA	NA
SLC35B3	GSN	NA	NA	ZDHHC24	NA	NA	NA	NA	NA	NA	NA	NA	NA	NA
SLC35F5	GSTM3	NA	NA	ZFHX2	NA	NA	NA	NA	NA	NA	NA	NA	NA	NA
SLC36A1	GSTO1	NA	NA	ZMAT3	NA	NA	NA	NA	NA	NA	NA	NA	NA	NA
SLC39A13	GUK1	NA	NA	ZNF264	NA	NA	NA	NA	NA	NA	NA	NA	NA	NA
SLC39A6	GYS1	NA	NA	ZNF432	NA	NA	NA	NA	NA	NA	NA	NA	NA	NA
SLC41A2	H6PD	NA	NA	ZNF583	NA	NA	NA	NA	NA	NA	NA	NA	NA	NA
SLC46A3	HAGH	NA	NA	ZNF622	NA	NA	NA	NA	NA	NA	NA	NA	NA	NA
SLC7A5	HAGHL	NA	NA	ZNF654	NA	NA	NA	NA	NA	NA	NA	NA	NA	NA
SLC9A1	HAPLN1	NA	NA	ZNFX1	NA	NA	NA	NA	NA	NA	NA	NA	NA	NA
SLC9A3R2	HAS1	NA	NA	NA	NA	NA	NA	NA	NA	NA	NA	NA	NA	NA
SLC9A7	HBEGF	NA	NA	NA	NA	NA	NA	NA	NA	NA	NA	NA	NA	NA
SLFN12	HCCS	NA	NA	NA	NA	NA	NA	NA	NA	NA	NA	NA	NA	NA
SMURF2	HCN2	NA	NA	NA	NA	NA	NA	NA	NA	NA	NA	NA	NA	NA
SP100	HCN3	NA	NA	NA	NA	NA	NA	NA	NA	NA	NA	NA	NA	NA
SPARC	HCST	NA	NA	NA	NA	NA	NA	NA	NA	NA	NA	NA	NA	NA
SPATA18	HDAC11	NA	NA	NA	NA	NA	NA	NA	NA	NA	NA	NA	NA	NA
SPOCK1	HDAC9	NA	NA	NA	NA	NA	NA	NA	NA	NA	NA	NA	NA	NA
SPRED1	HEATR5A	NA	NA	NA	NA	NA	NA	NA	NA	NA	NA	NA	NA	NA
SPTAN1	HEATR5B	NA	NA	NA	NA	NA	NA	NA	NA	NA	NA	NA	NA	NA
SQLE	HECW1	NA	NA	NA	NA	NA	NA	NA	NA	NA	NA	NA	NA	NA
SRGN	HECW2	NA	NA	NA	NA	NA	NA	NA	NA	NA	NA	NA	NA	NA
SRPX2	HERPUD1	NA	NA	NA	NA	NA	NA	NA	NA	NA	NA	NA	NA	NA
SSTR1	HES3	NA	NA	NA	NA	NA	NA	NA	NA	NA	NA	NA	NA	NA
STARD4	HES4	NA	NA	NA	NA	NA	NA	NA	NA	NA	NA	NA	NA	NA
STIM1	HEXB	NA	NA	NA	NA	NA	NA	NA	NA	NA	NA	NA	NA	NA
STK10	HGSNAT	NA	NA	NA	NA	NA	NA	NA	NA	NA	NA	NA	NA	NA
STX12	HHAT	NA	NA	NA	NA	NA	NA	NA	NA	NA	NA	NA	NA	NA
STX3	HHIP	NA	NA	NA	NA	NA	NA	NA	NA	NA	NA	NA	NA	NA
STX4	HIF1A	NA	NA	NA	NA	NA	NA	NA	NA	NA	NA	NA	NA	NA
STX6	HINT3	NA	NA	NA	NA	NA	NA	NA	NA	NA	NA	NA	NA	NA
STXBP6	HIPK3	NA	NA	NA	NA	NA	NA	NA	NA	NA	NA	NA	NA	NA
SVIL	HIST1H1T	NA	NA	NA	NA	NA	NA	NA	NA	NA	NA	NA	NA	NA
SYNGR2	HIST1H2BK	NA	NA	NA	NA	NA	NA	NA	NA	NA	NA	NA	NA	NA
SYT1	HIST2H2BE	NA	NA	NA	NA	NA	NA	NA	NA	NA	NA	NA	NA	NA
TAC3	HIVEP1	NA	NA	NA	NA	NA	NA	NA	NA	NA	NA	NA	NA	NA
TAF13	HIVEP2	NA	NA	NA	NA	NA	NA	NA	NA	NA	NA	NA	NA	NA
TBC1D2	HK2	NA	NA	NA	NA	NA	NA	NA	NA	NA	NA	NA	NA	NA
TBC1D4	HLA-DPA1	NA	NA	NA	NA	NA	NA	NA	NA	NA	NA	NA	NA	NA
TBC1D8B	HLA-DPB1	NA	NA	NA	NA	NA	NA	NA	NA	NA	NA	NA	NA	NA
TCP11L1	HLA-F	NA	NA	NA	NA	NA	NA	NA	NA	NA	NA	NA	NA	NA
TCTA	HM13	NA	NA	NA	NA	NA	NA	NA	NA	NA	NA	NA	NA	NA
TDG	HNF4A	NA	NA	NA	NA	NA	NA	NA	NA	NA	NA	NA	NA	NA
TEX2	HOXB5	NA	NA	NA	NA	NA	NA	NA	NA	NA	NA	NA	NA	NA
TFAP2A	HSD17B14	NA	NA	NA	NA	NA	NA	NA	NA	NA	NA	NA	NA	NA
TFEB	HSD17B2	NA	NA	NA	NA	NA	NA	NA	NA	NA	NA	NA	NA	NA
TG	HSD3B7	NA	NA	NA	NA	NA	NA	NA	NA	NA	NA	NA	NA	NA
TGFBR2	HSPB6	NA	NA	NA	NA	NA	NA	NA	NA	NA	NA	NA	NA	NA
TGM2	HSPB8	NA	NA	NA	NA	NA	NA	NA	NA	NA	NA	NA	NA	NA
THY1	HSPG2	NA	NA	NA	NA	NA	NA	NA	NA	NA	NA	NA	NA	NA
TIAM1	HTR1D	NA	NA	NA	NA	NA	NA	NA	NA	NA	NA	NA	NA	NA
TIMP3	HTR1E	NA	NA	NA	NA	NA	NA	NA	NA	NA	NA	NA	NA	NA
TLR6	ICAM1	NA	NA	NA	NA	NA	NA	NA	NA	NA	NA	NA	NA	NA
TM6SF1	ICAM4	NA	NA	NA	NA	NA	NA	NA	NA	NA	NA	NA	NA	NA
TM6SF2	ICAM5	NA	NA	NA	NA	NA	NA	NA	NA	NA	NA	NA	NA	NA
TMEM106A	IDS	NA	NA	NA	NA	NA	NA	NA	NA	NA	NA	NA	NA	NA
TMEM117	IDUA	NA	NA	NA	NA	NA	NA	NA	NA	NA	NA	NA	NA	NA
TMEM130	IER3	NA	NA	NA	NA	NA	NA	NA	NA	NA	NA	NA	NA	NA
TMEM131	IFI27L2	NA	NA	NA	NA	NA	NA	NA	NA	NA	NA	NA	NA	NA
TMEM132A	IFI30	NA	NA	NA	NA	NA	NA	NA	NA	NA	NA	NA	NA	NA
TMEM136	IFI6	NA	NA	NA	NA	NA	NA	NA	NA	NA	NA	NA	NA	NA
TMEM150A	IFNGR1	NA	NA	NA	NA	NA	NA	NA	NA	NA	NA	NA	NA	NA
TMEM154	IFNGR2	NA	NA	NA	NA	NA	NA	NA	NA	NA	NA	NA	NA	NA
TMEM156	IGDCC4	NA	NA	NA	NA	NA	NA	NA	NA	NA	NA	NA	NA	NA
TMEM167A	IGF1R	NA	NA	NA	NA	NA	NA	NA	NA	NA	NA	NA	NA	NA
TMEM200A	IGF2R	NA	NA	NA	NA	NA	NA	NA	NA	NA	NA	NA	NA	NA
TMEM217	IGFBP3	NA	NA	NA	NA	NA	NA	NA	NA	NA	NA	NA	NA	NA
TMEM9B	IGFBP7	NA	NA	NA	NA	NA	NA	NA	NA	NA	NA	NA	NA	NA
TNFAIP1	IL10RB	NA	NA	NA	NA	NA	NA	NA	NA	NA	NA	NA	NA	NA
TNFAIP3	IL13	NA	NA	NA	NA	NA	NA	NA	NA	NA	NA	NA	NA	NA
TNFRSF10B	IL1RAP	NA	NA	NA	NA	NA	NA	NA	NA	NA	NA	NA	NA	NA
TNFRSF10D	IL32	NA	NA	NA	NA	NA	NA	NA	NA	NA	NA	NA	NA	NA
TNFRSF9	IL6	NA	NA	NA	NA	NA	NA	NA	NA	NA	NA	NA	NA	NA
TNFSF18	INA	NA	NA	NA	NA	NA	NA	NA	NA	NA	NA	NA	NA	NA
TNFSF4	INF2	NA	NA	NA	NA	NA	NA	NA	NA	NA	NA	NA	NA	NA
TNIP1	INHBA	NA	NA	NA	NA	NA	NA	NA	NA	NA	NA	NA	NA	NA
TOB1	INHBB	NA	NA	NA	NA	NA	NA	NA	NA	NA	NA	NA	NA	NA
TOX2	INPP5A	NA	NA	NA	NA	NA	NA	NA	NA	NA	NA	NA	NA	NA
TP53INP1	INSC	NA	NA	NA	NA	NA	NA	NA	NA	NA	NA	NA	NA	NA
TPBG	INSIG2	NA	NA	NA	NA	NA	NA	NA	NA	NA	NA	NA	NA	NA
TPM1	INTU	NA	NA	NA	NA	NA	NA	NA	NA	NA	NA	NA	NA	NA
TPRG1L	IQSEC3	NA	NA	NA	NA	NA	NA	NA	NA	NA	NA	NA	NA	NA
TRAF1	IRS2	NA	NA	NA	NA	NA	NA	NA	NA	NA	NA	NA	NA	NA
TRAF4	ISCU	NA	NA	NA	NA	NA	NA	NA	NA	NA	NA	NA	NA	NA
TRAK1	ISG15	NA	NA	NA	NA	NA	NA	NA	NA	NA	NA	NA	NA	NA
TRAK2	ISM2	NA	NA	NA	NA	NA	NA	NA	NA	NA	NA	NA	NA	NA
TRIM22	ITFG1	NA	NA	NA	NA	NA	NA	NA	NA	NA	NA	NA	NA	NA
TRIM55	ITGA11	NA	NA	NA	NA	NA	NA	NA	NA	NA	NA	NA	NA	NA
TRIML2	ITGA3	NA	NA	NA	NA	NA	NA	NA	NA	NA	NA	NA	NA	NA
TRPC1	ITGAV	NA	NA	NA	NA	NA	NA	NA	NA	NA	NA	NA	NA	NA
TRPC4	ITGB5	NA	NA	NA	NA	NA	NA	NA	NA	NA	NA	NA	NA	NA
TRPM4	ITGB6	NA	NA	NA	NA	NA	NA	NA	NA	NA	NA	NA	NA	NA
TRPV2	ITGBL1	NA	NA	NA	NA	NA	NA	NA	NA	NA	NA	NA	NA	NA
TSPAN13	ITM2B	NA	NA	NA	NA	NA	NA	NA	NA	NA	NA	NA	NA	NA
TSPAN14	ITPR2	NA	NA	NA	NA	NA	NA	NA	NA	NA	NA	NA	NA	NA
TSPAN9	ITPRIPL2	NA	NA	NA	NA	NA	NA	NA	NA	NA	NA	NA	NA	NA
TSPYL6	IVL	NA	NA	NA	NA	NA	NA	NA	NA	NA	NA	NA	NA	NA
TTC3	JAG2	NA	NA	NA	NA	NA	NA	NA	NA	NA	NA	NA	NA	NA
TUBB2A	JKAMP	NA	NA	NA	NA	NA	NA	NA	NA	NA	NA	NA	NA	NA
TUBB2B	JPH2	NA	NA	NA	NA	NA	NA	NA	NA	NA	NA	NA	NA	NA
UBL3	JUP	NA	NA	NA	NA	NA	NA	NA	NA	NA	NA	NA	NA	NA
UCHL1	KATNAL1	NA	NA	NA	NA	NA	NA	NA	NA	NA	NA	NA	NA	NA
UFM1	KCNA10	NA	NA	NA	NA	NA	NA	NA	NA	NA	NA	NA	NA	NA
ULBP1	KCNAB2	NA	NA	NA	NA	NA	NA	NA	NA	NA	NA	NA	NA	NA
UNC13B	KCNC4	NA	NA	NA	NA	NA	NA	NA	NA	NA	NA	NA	NA	NA
USP53	KCNH1	NA	NA	NA	NA	NA	NA	NA	NA	NA	NA	NA	NA	NA
VAMP2	KCNH4	NA	NA	NA	NA	NA	NA	NA	NA	NA	NA	NA	NA	NA
VAT1	KCNH6	NA	NA	NA	NA	NA	NA	NA	NA	NA	NA	NA	NA	NA
VEPH1	KCNJ10	NA	NA	NA	NA	NA	NA	NA	NA	NA	NA	NA	NA	NA
VGLL3	KCNJ2	NA	NA	NA	NA	NA	NA	NA	NA	NA	NA	NA	NA	NA
WDR26	KCNK12	NA	NA	NA	NA	NA	NA	NA	NA	NA	NA	NA	NA	NA
WDR41	KCNK6	NA	NA	NA	NA	NA	NA	NA	NA	NA	NA	NA	NA	NA
WDR63	KCNMB4	NA	NA	NA	NA	NA	NA	NA	NA	NA	NA	NA	NA	NA
WDR66	KCNN2	NA	NA	NA	NA	NA	NA	NA	NA	NA	NA	NA	NA	NA
WIPI1	KCNQ3	NA	NA	NA	NA	NA	NA	NA	NA	NA	NA	NA	NA	NA
WNT16	KCTD11	NA	NA	NA	NA	NA	NA	NA	NA	NA	NA	NA	NA	NA
WNT5A	KCTD16	NA	NA	NA	NA	NA	NA	NA	NA	NA	NA	NA	NA	NA
WNT5B	KCTD20	NA	NA	NA	NA	NA	NA	NA	NA	NA	NA	NA	NA	NA
XDH	KCTD4	NA	NA	NA	NA	NA	NA	NA	NA	NA	NA	NA	NA	NA
YPEL2	KCTD9	NA	NA	NA	NA	NA	NA	NA	NA	NA	NA	NA	NA	NA
ZBTB46	KDELR3	NA	NA	NA	NA	NA	NA	NA	NA	NA	NA	NA	NA	NA
ZC3HAV1L	KDM4B	NA	NA	NA	NA	NA	NA	NA	NA	NA	NA	NA	NA	NA
ZDHHC24	KDM4C	NA	NA	NA	NA	NA	NA	NA	NA	NA	NA	NA	NA	NA
ZDHHC5	KIAA0319L	NA	NA	NA	NA	NA	NA	NA	NA	NA	NA	NA	NA	NA
ZFC3H1	KIAA1191	NA	NA	NA	NA	NA	NA	NA	NA	NA	NA	NA	NA	NA
ZFHX2	KIAA1324	NA	NA	NA	NA	NA	NA	NA	NA	NA	NA	NA	NA	NA
ZMAT3	KIF1C	NA	NA	NA	NA	NA	NA	NA	NA	NA	NA	NA	NA	NA
ZNF264	KIF26B	NA	NA	NA	NA	NA	NA	NA	NA	NA	NA	NA	NA	NA
ZNF432	KIF5A	NA	NA	NA	NA	NA	NA	NA	NA	NA	NA	NA	NA	NA
ZNF583	KIFC2	NA	NA	NA	NA	NA	NA	NA	NA	NA	NA	NA	NA	NA
ZNF622	KIRREL3	NA	NA	NA	NA	NA	NA	NA	NA	NA	NA	NA	NA	NA
ZNF654	KISS1	NA	NA	NA	NA	NA	NA	NA	NA	NA	NA	NA	NA	NA
ZNF699	KIT	NA	NA	NA	NA	NA	NA	NA	NA	NA	NA	NA	NA	NA
ZNF805	KL	NA	NA	NA	NA	NA	NA	NA	NA	NA	NA	NA	NA	NA
ZNF841	KLC1	NA	NA	NA	NA	NA	NA	NA	NA	NA	NA	NA	NA	NA
ZNFX1	KLF11	NA	NA	NA	NA	NA	NA	NA	NA	NA	NA	NA	NA	NA
ZSWIM4	KLF14	NA	NA	NA	NA	NA	NA	NA	NA	NA	NA	NA	NA	NA
NA	KLF7	NA	NA	NA	NA	NA	NA	NA	NA	NA	NA	NA	NA	NA
NA	KLF8	NA	NA	NA	NA	NA	NA	NA	NA	NA	NA	NA	NA	NA
NA	KLHDC1	NA	NA	NA	NA	NA	NA	NA	NA	NA	NA	NA	NA	NA
NA	KLHL24	NA	NA	NA	NA	NA	NA	NA	NA	NA	NA	NA	NA	NA
NA	KLHL3	NA	NA	NA	NA	NA	NA	NA	NA	NA	NA	NA	NA	NA
NA	KLHL30	NA	NA	NA	NA	NA	NA	NA	NA	NA	NA	NA	NA	NA
NA	KLHL35	NA	NA	NA	NA	NA	NA	NA	NA	NA	NA	NA	NA	NA
NA	KLHL36	NA	NA	NA	NA	NA	NA	NA	NA	NA	NA	NA	NA	NA
NA	KRT15	NA	NA	NA	NA	NA	NA	NA	NA	NA	NA	NA	NA	NA
NA	KRT17	NA	NA	NA	NA	NA	NA	NA	NA	NA	NA	NA	NA	NA
NA	KRT18	NA	NA	NA	NA	NA	NA	NA	NA	NA	NA	NA	NA	NA
NA	KRT8	NA	NA	NA	NA	NA	NA	NA	NA	NA	NA	NA	NA	NA
NA	KRTAP4-2	NA	NA	NA	NA	NA	NA	NA	NA	NA	NA	NA	NA	NA
NA	KRTAP4-4	NA	NA	NA	NA	NA	NA	NA	NA	NA	NA	NA	NA	NA
NA	KRTAP5-7	NA	NA	NA	NA	NA	NA	NA	NA	NA	NA	NA	NA	NA
NA	KRTAP5-8	NA	NA	NA	NA	NA	NA	NA	NA	NA	NA	NA	NA	NA
NA	L1CAM	NA	NA	NA	NA	NA	NA	NA	NA	NA	NA	NA	NA	NA
NA	LAMA1	NA	NA	NA	NA	NA	NA	NA	NA	NA	NA	NA	NA	NA
NA	LAMB1	NA	NA	NA	NA	NA	NA	NA	NA	NA	NA	NA	NA	NA
NA	LAMB2	NA	NA	NA	NA	NA	NA	NA	NA	NA	NA	NA	NA	NA
NA	LAMC1	NA	NA	NA	NA	NA	NA	NA	NA	NA	NA	NA	NA	NA
NA	LAMC2	NA	NA	NA	NA	NA	NA	NA	NA	NA	NA	NA	NA	NA
NA	LAMP2	NA	NA	NA	NA	NA	NA	NA	NA	NA	NA	NA	NA	NA
NA	LATS2	NA	NA	NA	NA	NA	NA	NA	NA	NA	NA	NA	NA	NA
NA	LCE2A	NA	NA	NA	NA	NA	NA	NA	NA	NA	NA	NA	NA	NA
NA	LCE2B	NA	NA	NA	NA	NA	NA	NA	NA	NA	NA	NA	NA	NA
NA	LCE2C	NA	NA	NA	NA	NA	NA	NA	NA	NA	NA	NA	NA	NA
NA	LCE2D	NA	NA	NA	NA	NA	NA	NA	NA	NA	NA	NA	NA	NA
NA	LCE3B	NA	NA	NA	NA	NA	NA	NA	NA	NA	NA	NA	NA	NA
NA	LCN1	NA	NA	NA	NA	NA	NA	NA	NA	NA	NA	NA	NA	NA
NA	LDOC1	NA	NA	NA	NA	NA	NA	NA	NA	NA	NA	NA	NA	NA
NA	LEP	NA	NA	NA	NA	NA	NA	NA	NA	NA	NA	NA	NA	NA
NA	LGMN	NA	NA	NA	NA	NA	NA	NA	NA	NA	NA	NA	NA	NA
NA	LGR4	NA	NA	NA	NA	NA	NA	NA	NA	NA	NA	NA	NA	NA
NA	LILRA5	NA	NA	NA	NA	NA	NA	NA	NA	NA	NA	NA	NA	NA
NA	LIMCH1	NA	NA	NA	NA	NA	NA	NA	NA	NA	NA	NA	NA	NA
NA	LIMK2	NA	NA	NA	NA	NA	NA	NA	NA	NA	NA	NA	NA	NA
NA	LIMS1	NA	NA	NA	NA	NA	NA	NA	NA	NA	NA	NA	NA	NA
NA	LIMS2	NA	NA	NA	NA	NA	NA	NA	NA	NA	NA	NA	NA	NA
NA	LIN7B	NA	NA	NA	NA	NA	NA	NA	NA	NA	NA	NA	NA	NA
NA	LINGO3	NA	NA	NA	NA	NA	NA	NA	NA	NA	NA	NA	NA	NA
NA	LIPG	NA	NA	NA	NA	NA	NA	NA	NA	NA	NA	NA	NA	NA
NA	LIPH	NA	NA	NA	NA	NA	NA	NA	NA	NA	NA	NA	NA	NA
NA	LMBRD1	NA	NA	NA	NA	NA	NA	NA	NA	NA	NA	NA	NA	NA
NA	LMBRD2	NA	NA	NA	NA	NA	NA	NA	NA	NA	NA	NA	NA	NA
NA	LMF1	NA	NA	NA	NA	NA	NA	NA	NA	NA	NA	NA	NA	NA
NA	LMLN	NA	NA	NA	NA	NA	NA	NA	NA	NA	NA	NA	NA	NA
NA	LMO7	NA	NA	NA	NA	NA	NA	NA	NA	NA	NA	NA	NA	NA
NA	LNPEP	NA	NA	NA	NA	NA	NA	NA	NA	NA	NA	NA	NA	NA
NA	LOC389834	NA	NA	NA	NA	NA	NA	NA	NA	NA	NA	NA	NA	NA
NA	LOX	NA	NA	NA	NA	NA	NA	NA	NA	NA	NA	NA	NA	NA
NA	LOXL4	NA	NA	NA	NA	NA	NA	NA	NA	NA	NA	NA	NA	NA
NA	LPCAT2	NA	NA	NA	NA	NA	NA	NA	NA	NA	NA	NA	NA	NA
NA	LPXN	NA	NA	NA	NA	NA	NA	NA	NA	NA	NA	NA	NA	NA
NA	LRP10	NA	NA	NA	NA	NA	NA	NA	NA	NA	NA	NA	NA	NA
NA	LRP12	NA	NA	NA	NA	NA	NA	NA	NA	NA	NA	NA	NA	NA
NA	LRRC1	NA	NA	NA	NA	NA	NA	NA	NA	NA	NA	NA	NA	NA
NA	LRRC17	NA	NA	NA	NA	NA	NA	NA	NA	NA	NA	NA	NA	NA
NA	LRRFIP1	NA	NA	NA	NA	NA	NA	NA	NA	NA	NA	NA	NA	NA
NA	LRRN3	NA	NA	NA	NA	NA	NA	NA	NA	NA	NA	NA	NA	NA
NA	LTBP1	NA	NA	NA	NA	NA	NA	NA	NA	NA	NA	NA	NA	NA
NA	LTBP3	NA	NA	NA	NA	NA	NA	NA	NA	NA	NA	NA	NA	NA
NA	LUZP1	NA	NA	NA	NA	NA	NA	NA	NA	NA	NA	NA	NA	NA
NA	LY6H	NA	NA	NA	NA	NA	NA	NA	NA	NA	NA	NA	NA	NA
NA	LYN	NA	NA	NA	NA	NA	NA	NA	NA	NA	NA	NA	NA	NA
NA	LYNX1	NA	NA	NA	NA	NA	NA	NA	NA	NA	NA	NA	NA	NA
NA	LYPD2	NA	NA	NA	NA	NA	NA	NA	NA	NA	NA	NA	NA	NA
NA	LYSMD3	NA	NA	NA	NA	NA	NA	NA	NA	NA	NA	NA	NA	NA
NA	MAB21L1	NA	NA	NA	NA	NA	NA	NA	NA	NA	NA	NA	NA	NA
NA	MACF1	NA	NA	NA	NA	NA	NA	NA	NA	NA	NA	NA	NA	NA
NA	MAFF	NA	NA	NA	NA	NA	NA	NA	NA	NA	NA	NA	NA	NA
NA	MAFK	NA	NA	NA	NA	NA	NA	NA	NA	NA	NA	NA	NA	NA
NA	MAGI1	NA	NA	NA	NA	NA	NA	NA	NA	NA	NA	NA	NA	NA
NA	MAMDC2	NA	NA	NA	NA	NA	NA	NA	NA	NA	NA	NA	NA	NA
NA	MAML3	NA	NA	NA	NA	NA	NA	NA	NA	NA	NA	NA	NA	NA
NA	MAN1B1	NA	NA	NA	NA	NA	NA	NA	NA	NA	NA	NA	NA	NA
NA	MAN2A1	NA	NA	NA	NA	NA	NA	NA	NA	NA	NA	NA	NA	NA
NA	MAN2B2	NA	NA	NA	NA	NA	NA	NA	NA	NA	NA	NA	NA	NA
NA	MANBA	NA	NA	NA	NA	NA	NA	NA	NA	NA	NA	NA	NA	NA
NA	MAP1LC3A	NA	NA	NA	NA	NA	NA	NA	NA	NA	NA	NA	NA	NA
NA	MAP3K10	NA	NA	NA	NA	NA	NA	NA	NA	NA	NA	NA	NA	NA
NA	MAP3K13	NA	NA	NA	NA	NA	NA	NA	NA	NA	NA	NA	NA	NA
NA	MAP4K3	NA	NA	NA	NA	NA	NA	NA	NA	NA	NA	NA	NA	NA
NA	MAP6	NA	NA	NA	NA	NA	NA	NA	NA	NA	NA	NA	NA	NA
NA	MAPK11	NA	NA	NA	NA	NA	NA	NA	NA	NA	NA	NA	NA	NA
NA	MAPK12	NA	NA	NA	NA	NA	NA	NA	NA	NA	NA	NA	NA	NA
NA	MAPK3	NA	NA	NA	NA	NA	NA	NA	NA	NA	NA	NA	NA	NA
NA	MAPK8IP3	NA	NA	NA	NA	NA	NA	NA	NA	NA	NA	NA	NA	NA
NA	MAPRE2	NA	NA	NA	NA	NA	NA	NA	NA	NA	NA	NA	NA	NA
NA	MAPRE3	NA	NA	NA	NA	NA	NA	NA	NA	NA	NA	NA	NA	NA
NA	MARK4	NA	NA	NA	NA	NA	NA	NA	NA	NA	NA	NA	NA	NA
NA	MAST4	NA	NA	NA	NA	NA	NA	NA	NA	NA	NA	NA	NA	NA
NA	MBOAT7	NA	NA	NA	NA	NA	NA	NA	NA	NA	NA	NA	NA	NA
NA	MCFD2	NA	NA	NA	NA	NA	NA	NA	NA	NA	NA	NA	NA	NA
NA	MCOLN1	NA	NA	NA	NA	NA	NA	NA	NA	NA	NA	NA	NA	NA
NA	MCTP2	NA	NA	NA	NA	NA	NA	NA	NA	NA	NA	NA	NA	NA
NA	MDM2	NA	NA	NA	NA	NA	NA	NA	NA	NA	NA	NA	NA	NA
NA	MEGF6	NA	NA	NA	NA	NA	NA	NA	NA	NA	NA	NA	NA	NA
NA	MFAP2	NA	NA	NA	NA	NA	NA	NA	NA	NA	NA	NA	NA	NA
NA	MFAP3L	NA	NA	NA	NA	NA	NA	NA	NA	NA	NA	NA	NA	NA
NA	MFAP5	NA	NA	NA	NA	NA	NA	NA	NA	NA	NA	NA	NA	NA
NA	MFGE8	NA	NA	NA	NA	NA	NA	NA	NA	NA	NA	NA	NA	NA
NA	MFSD1	NA	NA	NA	NA	NA	NA	NA	NA	NA	NA	NA	NA	NA
NA	MFSD3	NA	NA	NA	NA	NA	NA	NA	NA	NA	NA	NA	NA	NA
NA	MGAT5	NA	NA	NA	NA	NA	NA	NA	NA	NA	NA	NA	NA	NA
NA	MGLL	NA	NA	NA	NA	NA	NA	NA	NA	NA	NA	NA	NA	NA
NA	MGP	NA	NA	NA	NA	NA	NA	NA	NA	NA	NA	NA	NA	NA
NA	MGST2	NA	NA	NA	NA	NA	NA	NA	NA	NA	NA	NA	NA	NA
NA	MICA	NA	NA	NA	NA	NA	NA	NA	NA	NA	NA	NA	NA	NA
NA	MICALCL	NA	NA	NA	NA	NA	NA	NA	NA	NA	NA	NA	NA	NA
NA	MINK1	NA	NA	NA	NA	NA	NA	NA	NA	NA	NA	NA	NA	NA
NA	MLKL	NA	NA	NA	NA	NA	NA	NA	NA	NA	NA	NA	NA	NA
NA	MLLT11	NA	NA	NA	NA	NA	NA	NA	NA	NA	NA	NA	NA	NA
NA	MMP10	NA	NA	NA	NA	NA	NA	NA	NA	NA	NA	NA	NA	NA
NA	MMP12	NA	NA	NA	NA	NA	NA	NA	NA	NA	NA	NA	NA	NA
NA	MMP24	NA	NA	NA	NA	NA	NA	NA	NA	NA	NA	NA	NA	NA
NA	MMP3	NA	NA	NA	NA	NA	NA	NA	NA	NA	NA	NA	NA	NA
NA	MMP9	NA	NA	NA	NA	NA	NA	NA	NA	NA	NA	NA	NA	NA
NA	MOAP1	NA	NA	NA	NA	NA	NA	NA	NA	NA	NA	NA	NA	NA
NA	MOG	NA	NA	NA	NA	NA	NA	NA	NA	NA	NA	NA	NA	NA
NA	MOGS	NA	NA	NA	NA	NA	NA	NA	NA	NA	NA	NA	NA	NA
NA	MORC4	NA	NA	NA	NA	NA	NA	NA	NA	NA	NA	NA	NA	NA
NA	MPP2	NA	NA	NA	NA	NA	NA	NA	NA	NA	NA	NA	NA	NA
NA	MPP4	NA	NA	NA	NA	NA	NA	NA	NA	NA	NA	NA	NA	NA
NA	MPZL1	NA	NA	NA	NA	NA	NA	NA	NA	NA	NA	NA	NA	NA
NA	MPZL3	NA	NA	NA	NA	NA	NA	NA	NA	NA	NA	NA	NA	NA
NA	MR1	NA	NA	NA	NA	NA	NA	NA	NA	NA	NA	NA	NA	NA
NA	MRAS	NA	NA	NA	NA	NA	NA	NA	NA	NA	NA	NA	NA	NA
NA	MRC2	NA	NA	NA	NA	NA	NA	NA	NA	NA	NA	NA	NA	NA
NA	MRGPRX1	NA	NA	NA	NA	NA	NA	NA	NA	NA	NA	NA	NA	NA
NA	MRGPRX3	NA	NA	NA	NA	NA	NA	NA	NA	NA	NA	NA	NA	NA
NA	MRGPRX4	NA	NA	NA	NA	NA	NA	NA	NA	NA	NA	NA	NA	NA
NA	MRS2	NA	NA	NA	NA	NA	NA	NA	NA	NA	NA	NA	NA	NA
NA	MSI2	NA	NA	NA	NA	NA	NA	NA	NA	NA	NA	NA	NA	NA
NA	MSRB3	NA	NA	NA	NA	NA	NA	NA	NA	NA	NA	NA	NA	NA
NA	MT1X	NA	NA	NA	NA	NA	NA	NA	NA	NA	NA	NA	NA	NA
NA	MTNR1B	NA	NA	NA	NA	NA	NA	NA	NA	NA	NA	NA	NA	NA
NA	MTSS1	NA	NA	NA	NA	NA	NA	NA	NA	NA	NA	NA	NA	NA
NA	MUC1	NA	NA	NA	NA	NA	NA	NA	NA	NA	NA	NA	NA	NA
NA	MUC20	NA	NA	NA	NA	NA	NA	NA	NA	NA	NA	NA	NA	NA
NA	MVP	NA	NA	NA	NA	NA	NA	NA	NA	NA	NA	NA	NA	NA
NA	MXD1	NA	NA	NA	NA	NA	NA	NA	NA	NA	NA	NA	NA	NA
NA	MXI1	NA	NA	NA	NA	NA	NA	NA	NA	NA	NA	NA	NA	NA
NA	MXRA5	NA	NA	NA	NA	NA	NA	NA	NA	NA	NA	NA	NA	NA
NA	MXRA7	NA	NA	NA	NA	NA	NA	NA	NA	NA	NA	NA	NA	NA
NA	MYCT1	NA	NA	NA	NA	NA	NA	NA	NA	NA	NA	NA	NA	NA
NA	MYL12A	NA	NA	NA	NA	NA	NA	NA	NA	NA	NA	NA	NA	NA
NA	MYO1D	NA	NA	NA	NA	NA	NA	NA	NA	NA	NA	NA	NA	NA
NA	MYO1E	NA	NA	NA	NA	NA	NA	NA	NA	NA	NA	NA	NA	NA
NA	MYO6	NA	NA	NA	NA	NA	NA	NA	NA	NA	NA	NA	NA	NA
NA	MYOZ1	NA	NA	NA	NA	NA	NA	NA	NA	NA	NA	NA	NA	NA
NA	MYOZ2	NA	NA	NA	NA	NA	NA	NA	NA	NA	NA	NA	NA	NA
NA	NAAA	NA	NA	NA	NA	NA	NA	NA	NA	NA	NA	NA	NA	NA
NA	NAALADL2	NA	NA	NA	NA	NA	NA	NA	NA	NA	NA	NA	NA	NA
NA	NADSYN1	NA	NA	NA	NA	NA	NA	NA	NA	NA	NA	NA	NA	NA
NA	NALCN	NA	NA	NA	NA	NA	NA	NA	NA	NA	NA	NA	NA	NA
NA	NAP1L3	NA	NA	NA	NA	NA	NA	NA	NA	NA	NA	NA	NA	NA
NA	NAP1L5	NA	NA	NA	NA	NA	NA	NA	NA	NA	NA	NA	NA	NA
NA	NAPB	NA	NA	NA	NA	NA	NA	NA	NA	NA	NA	NA	NA	NA
NA	NAV1	NA	NA	NA	NA	NA	NA	NA	NA	NA	NA	NA	NA	NA
NA	NBEAL1	NA	NA	NA	NA	NA	NA	NA	NA	NA	NA	NA	NA	NA
NA	NCF2	NA	NA	NA	NA	NA	NA	NA	NA	NA	NA	NA	NA	NA
NA	NCKAP5L	NA	NA	NA	NA	NA	NA	NA	NA	NA	NA	NA	NA	NA
NA	NCOA3	NA	NA	NA	NA	NA	NA	NA	NA	NA	NA	NA	NA	NA
NA	NCOA7	NA	NA	NA	NA	NA	NA	NA	NA	NA	NA	NA	NA	NA
NA	NDEL1	NA	NA	NA	NA	NA	NA	NA	NA	NA	NA	NA	NA	NA
NA	NDFIP1	NA	NA	NA	NA	NA	NA	NA	NA	NA	NA	NA	NA	NA
NA	NDFIP2	NA	NA	NA	NA	NA	NA	NA	NA	NA	NA	NA	NA	NA
NA	NDST1	NA	NA	NA	NA	NA	NA	NA	NA	NA	NA	NA	NA	NA
NA	NDUFA1	NA	NA	NA	NA	NA	NA	NA	NA	NA	NA	NA	NA	NA
NA	NDUFC1	NA	NA	NA	NA	NA	NA	NA	NA	NA	NA	NA	NA	NA
NA	NEDD4L	NA	NA	NA	NA	NA	NA	NA	NA	NA	NA	NA	NA	NA
NA	NEDD9	NA	NA	NA	NA	NA	NA	NA	NA	NA	NA	NA	NA	NA
NA	NEGR1	NA	NA	NA	NA	NA	NA	NA	NA	NA	NA	NA	NA	NA
NA	NEO1	NA	NA	NA	NA	NA	NA	NA	NA	NA	NA	NA	NA	NA
NA	NEURL3	NA	NA	NA	NA	NA	NA	NA	NA	NA	NA	NA	NA	NA
NA	NEXN	NA	NA	NA	NA	NA	NA	NA	NA	NA	NA	NA	NA	NA
NA	NFAT5	NA	NA	NA	NA	NA	NA	NA	NA	NA	NA	NA	NA	NA
NA	NFE2L1	NA	NA	NA	NA	NA	NA	NA	NA	NA	NA	NA	NA	NA
NA	NFE2L3	NA	NA	NA	NA	NA	NA	NA	NA	NA	NA	NA	NA	NA
NA	NFKBIZ	NA	NA	NA	NA	NA	NA	NA	NA	NA	NA	NA	NA	NA
NA	NIPAL1	NA	NA	NA	NA	NA	NA	NA	NA	NA	NA	NA	NA	NA
NA	NIPAL2	NA	NA	NA	NA	NA	NA	NA	NA	NA	NA	NA	NA	NA
NA	NIPAL3	NA	NA	NA	NA	NA	NA	NA	NA	NA	NA	NA	NA	NA
NA	NIPSNAP3A	NA	NA	NA	NA	NA	NA	NA	NA	NA	NA	NA	NA	NA
NA	NKIRAS2	NA	NA	NA	NA	NA	NA	NA	NA	NA	NA	NA	NA	NA
NA	NKX2-5	NA	NA	NA	NA	NA	NA	NA	NA	NA	NA	NA	NA	NA
NA	NKX3-1	NA	NA	NA	NA	NA	NA	NA	NA	NA	NA	NA	NA	NA
NA	NLRP10	NA	NA	NA	NA	NA	NA	NA	NA	NA	NA	NA	NA	NA
NA	NLRP6	NA	NA	NA	NA	NA	NA	NA	NA	NA	NA	NA	NA	NA
NA	NLRX1	NA	NA	NA	NA	NA	NA	NA	NA	NA	NA	NA	NA	NA
NA	NME3	NA	NA	NA	NA	NA	NA	NA	NA	NA	NA	NA	NA	NA
NA	NMNAT2	NA	NA	NA	NA	NA	NA	NA	NA	NA	NA	NA	NA	NA
NA	NOG	NA	NA	NA	NA	NA	NA	NA	NA	NA	NA	NA	NA	NA
NA	NOS1AP	NA	NA	NA	NA	NA	NA	NA	NA	NA	NA	NA	NA	NA
NA	NOSTRIN	NA	NA	NA	NA	NA	NA	NA	NA	NA	NA	NA	NA	NA
NA	NOTCH3	NA	NA	NA	NA	NA	NA	NA	NA	NA	NA	NA	NA	NA
NA	NOX1	NA	NA	NA	NA	NA	NA	NA	NA	NA	NA	NA	NA	NA
NA	NOX4	NA	NA	NA	NA	NA	NA	NA	NA	NA	NA	NA	NA	NA
NA	NOXA1	NA	NA	NA	NA	NA	NA	NA	NA	NA	NA	NA	NA	NA
NA	NPAS1	NA	NA	NA	NA	NA	NA	NA	NA	NA	NA	NA	NA	NA
NA	NPAS2	NA	NA	NA	NA	NA	NA	NA	NA	NA	NA	NA	NA	NA
NA	NPC1L1	NA	NA	NA	NA	NA	NA	NA	NA	NA	NA	NA	NA	NA
NA	NPDC1	NA	NA	NA	NA	NA	NA	NA	NA	NA	NA	NA	NA	NA
NA	NPL	NA	NA	NA	NA	NA	NA	NA	NA	NA	NA	NA	NA	NA
NA	NPPB	NA	NA	NA	NA	NA	NA	NA	NA	NA	NA	NA	NA	NA
NA	NPPC	NA	NA	NA	NA	NA	NA	NA	NA	NA	NA	NA	NA	NA
NA	NPR2	NA	NA	NA	NA	NA	NA	NA	NA	NA	NA	NA	NA	NA
NA	NR1H2	NA	NA	NA	NA	NA	NA	NA	NA	NA	NA	NA	NA	NA
NA	NRBP2	NA	NA	NA	NA	NA	NA	NA	NA	NA	NA	NA	NA	NA
NA	NRG1	NA	NA	NA	NA	NA	NA	NA	NA	NA	NA	NA	NA	NA
NA	NSF	NA	NA	NA	NA	NA	NA	NA	NA	NA	NA	NA	NA	NA
NA	NT5C2	NA	NA	NA	NA	NA	NA	NA	NA	NA	NA	NA	NA	NA
NA	NT5DC1	NA	NA	NA	NA	NA	NA	NA	NA	NA	NA	NA	NA	NA
NA	NTF3	NA	NA	NA	NA	NA	NA	NA	NA	NA	NA	NA	NA	NA
NA	NTM	NA	NA	NA	NA	NA	NA	NA	NA	NA	NA	NA	NA	NA
NA	NTNG2	NA	NA	NA	NA	NA	NA	NA	NA	NA	NA	NA	NA	NA
NA	NUAK1	NA	NA	NA	NA	NA	NA	NA	NA	NA	NA	NA	NA	NA
NA	NUDT18	NA	NA	NA	NA	NA	NA	NA	NA	NA	NA	NA	NA	NA
NA	NUDT22	NA	NA	NA	NA	NA	NA	NA	NA	NA	NA	NA	NA	NA
NA	NUMB	NA	NA	NA	NA	NA	NA	NA	NA	NA	NA	NA	NA	NA
NA	NXF3	NA	NA	NA	NA	NA	NA	NA	NA	NA	NA	NA	NA	NA
NA	NXPH3	NA	NA	NA	NA	NA	NA	NA	NA	NA	NA	NA	NA	NA
NA	NXPH4	NA	NA	NA	NA	NA	NA	NA	NA	NA	NA	NA	NA	NA
NA	OGFRL1	NA	NA	NA	NA	NA	NA	NA	NA	NA	NA	NA	NA	NA
NA	OPCML	NA	NA	NA	NA	NA	NA	NA	NA	NA	NA	NA	NA	NA
NA	OPHN1	NA	NA	NA	NA	NA	NA	NA	NA	NA	NA	NA	NA	NA
NA	OPRD1	NA	NA	NA	NA	NA	NA	NA	NA	NA	NA	NA	NA	NA
NA	OPRL1	NA	NA	NA	NA	NA	NA	NA	NA	NA	NA	NA	NA	NA
NA	OPTN	NA	NA	NA	NA	NA	NA	NA	NA	NA	NA	NA	NA	NA
NA	OR10A3	NA	NA	NA	NA	NA	NA	NA	NA	NA	NA	NA	NA	NA
NA	OR10Q1	NA	NA	NA	NA	NA	NA	NA	NA	NA	NA	NA	NA	NA
NA	OR1D2	NA	NA	NA	NA	NA	NA	NA	NA	NA	NA	NA	NA	NA
NA	OR1F1	NA	NA	NA	NA	NA	NA	NA	NA	NA	NA	NA	NA	NA
NA	OR1J4	NA	NA	NA	NA	NA	NA	NA	NA	NA	NA	NA	NA	NA
NA	OR1L8	NA	NA	NA	NA	NA	NA	NA	NA	NA	NA	NA	NA	NA
NA	OR1N2	NA	NA	NA	NA	NA	NA	NA	NA	NA	NA	NA	NA	NA
NA	OR1Q1	NA	NA	NA	NA	NA	NA	NA	NA	NA	NA	NA	NA	NA
NA	OR51E1	NA	NA	NA	NA	NA	NA	NA	NA	NA	NA	NA	NA	NA
NA	OR51M1	NA	NA	NA	NA	NA	NA	NA	NA	NA	NA	NA	NA	NA
NA	OR56A5	NA	NA	NA	NA	NA	NA	NA	NA	NA	NA	NA	NA	NA
NA	OR5B21	NA	NA	NA	NA	NA	NA	NA	NA	NA	NA	NA	NA	NA
NA	OR5P2	NA	NA	NA	NA	NA	NA	NA	NA	NA	NA	NA	NA	NA
NA	OR5P3	NA	NA	NA	NA	NA	NA	NA	NA	NA	NA	NA	NA	NA
NA	ORAI3	NA	NA	NA	NA	NA	NA	NA	NA	NA	NA	NA	NA	NA
NA	ORMDL3	NA	NA	NA	NA	NA	NA	NA	NA	NA	NA	NA	NA	NA
NA	OSBPL3	NA	NA	NA	NA	NA	NA	NA	NA	NA	NA	NA	NA	NA
NA	OSM	NA	NA	NA	NA	NA	NA	NA	NA	NA	NA	NA	NA	NA
NA	OSR2	NA	NA	NA	NA	NA	NA	NA	NA	NA	NA	NA	NA	NA
NA	OSTC	NA	NA	NA	NA	NA	NA	NA	NA	NA	NA	NA	NA	NA
NA	OSTM1	NA	NA	NA	NA	NA	NA	NA	NA	NA	NA	NA	NA	NA
NA	OTUB2	NA	NA	NA	NA	NA	NA	NA	NA	NA	NA	NA	NA	NA
NA	OVCH2	NA	NA	NA	NA	NA	NA	NA	NA	NA	NA	NA	NA	NA
NA	OVGP1	NA	NA	NA	NA	NA	NA	NA	NA	NA	NA	NA	NA	NA
NA	OXTR	NA	NA	NA	NA	NA	NA	NA	NA	NA	NA	NA	NA	NA
NA	P4HA1	NA	NA	NA	NA	NA	NA	NA	NA	NA	NA	NA	NA	NA
NA	P4HA2	NA	NA	NA	NA	NA	NA	NA	NA	NA	NA	NA	NA	NA
NA	P4HB	NA	NA	NA	NA	NA	NA	NA	NA	NA	NA	NA	NA	NA
NA	PACS1	NA	NA	NA	NA	NA	NA	NA	NA	NA	NA	NA	NA	NA
NA	PACS2	NA	NA	NA	NA	NA	NA	NA	NA	NA	NA	NA	NA	NA
NA	PAG1	NA	NA	NA	NA	NA	NA	NA	NA	NA	NA	NA	NA	NA
NA	PALMD	NA	NA	NA	NA	NA	NA	NA	NA	NA	NA	NA	NA	NA
NA	PAM	NA	NA	NA	NA	NA	NA	NA	NA	NA	NA	NA	NA	NA
NA	PAMR1	NA	NA	NA	NA	NA	NA	NA	NA	NA	NA	NA	NA	NA
NA	PAPPA	NA	NA	NA	NA	NA	NA	NA	NA	NA	NA	NA	NA	NA
NA	PAPPA2	NA	NA	NA	NA	NA	NA	NA	NA	NA	NA	NA	NA	NA
NA	PAPSS2	NA	NA	NA	NA	NA	NA	NA	NA	NA	NA	NA	NA	NA
NA	PAQR7	NA	NA	NA	NA	NA	NA	NA	NA	NA	NA	NA	NA	NA
NA	PARD6G	NA	NA	NA	NA	NA	NA	NA	NA	NA	NA	NA	NA	NA
NA	PAWR	NA	NA	NA	NA	NA	NA	NA	NA	NA	NA	NA	NA	NA
NA	PBLD	NA	NA	NA	NA	NA	NA	NA	NA	NA	NA	NA	NA	NA
NA	PBXIP1	NA	NA	NA	NA	NA	NA	NA	NA	NA	NA	NA	NA	NA
NA	PCBD1	NA	NA	NA	NA	NA	NA	NA	NA	NA	NA	NA	NA	NA
NA	PCDH1	NA	NA	NA	NA	NA	NA	NA	NA	NA	NA	NA	NA	NA
NA	PCDHA10	NA	NA	NA	NA	NA	NA	NA	NA	NA	NA	NA	NA	NA
NA	PCDHA13	NA	NA	NA	NA	NA	NA	NA	NA	NA	NA	NA	NA	NA
NA	PCDHA3	NA	NA	NA	NA	NA	NA	NA	NA	NA	NA	NA	NA	NA
NA	PCDHA4	NA	NA	NA	NA	NA	NA	NA	NA	NA	NA	NA	NA	NA
NA	PCDHA7	NA	NA	NA	NA	NA	NA	NA	NA	NA	NA	NA	NA	NA
NA	PCDHB10	NA	NA	NA	NA	NA	NA	NA	NA	NA	NA	NA	NA	NA
NA	PCDHB11	NA	NA	NA	NA	NA	NA	NA	NA	NA	NA	NA	NA	NA
NA	PCDHB12	NA	NA	NA	NA	NA	NA	NA	NA	NA	NA	NA	NA	NA
NA	PCDHB13	NA	NA	NA	NA	NA	NA	NA	NA	NA	NA	NA	NA	NA
NA	PCDHB14	NA	NA	NA	NA	NA	NA	NA	NA	NA	NA	NA	NA	NA
NA	PCDHB15	NA	NA	NA	NA	NA	NA	NA	NA	NA	NA	NA	NA	NA
NA	PCDHB16	NA	NA	NA	NA	NA	NA	NA	NA	NA	NA	NA	NA	NA
NA	PCDHB2	NA	NA	NA	NA	NA	NA	NA	NA	NA	NA	NA	NA	NA
NA	PCDHB5	NA	NA	NA	NA	NA	NA	NA	NA	NA	NA	NA	NA	NA
NA	PCDHB6	NA	NA	NA	NA	NA	NA	NA	NA	NA	NA	NA	NA	NA
NA	PCDHB8	NA	NA	NA	NA	NA	NA	NA	NA	NA	NA	NA	NA	NA
NA	PCDHB9	NA	NA	NA	NA	NA	NA	NA	NA	NA	NA	NA	NA	NA
NA	PCMTD1	NA	NA	NA	NA	NA	NA	NA	NA	NA	NA	NA	NA	NA
NA	PCSK5	NA	NA	NA	NA	NA	NA	NA	NA	NA	NA	NA	NA	NA
NA	PCSK7	NA	NA	NA	NA	NA	NA	NA	NA	NA	NA	NA	NA	NA
NA	PCYOX1	NA	NA	NA	NA	NA	NA	NA	NA	NA	NA	NA	NA	NA
NA	PCYT1A	NA	NA	NA	NA	NA	NA	NA	NA	NA	NA	NA	NA	NA
NA	PDCD1LG2	NA	NA	NA	NA	NA	NA	NA	NA	NA	NA	NA	NA	NA
NA	PDCD4	NA	NA	NA	NA	NA	NA	NA	NA	NA	NA	NA	NA	NA
NA	PDE11A	NA	NA	NA	NA	NA	NA	NA	NA	NA	NA	NA	NA	NA
NA	PDE1C	NA	NA	NA	NA	NA	NA	NA	NA	NA	NA	NA	NA	NA
NA	PDE8B	NA	NA	NA	NA	NA	NA	NA	NA	NA	NA	NA	NA	NA
NA	PDGFB	NA	NA	NA	NA	NA	NA	NA	NA	NA	NA	NA	NA	NA
NA	PDK4	NA	NA	NA	NA	NA	NA	NA	NA	NA	NA	NA	NA	NA
NA	PDLIM2	NA	NA	NA	NA	NA	NA	NA	NA	NA	NA	NA	NA	NA
NA	PDLIM5	NA	NA	NA	NA	NA	NA	NA	NA	NA	NA	NA	NA	NA
NA	PDZD7	NA	NA	NA	NA	NA	NA	NA	NA	NA	NA	NA	NA	NA
NA	PEA15	NA	NA	NA	NA	NA	NA	NA	NA	NA	NA	NA	NA	NA
NA	PEBP4	NA	NA	NA	NA	NA	NA	NA	NA	NA	NA	NA	NA	NA
NA	PERP	NA	NA	NA	NA	NA	NA	NA	NA	NA	NA	NA	NA	NA
NA	PFKFB2	NA	NA	NA	NA	NA	NA	NA	NA	NA	NA	NA	NA	NA
NA	PFKFB3	NA	NA	NA	NA	NA	NA	NA	NA	NA	NA	NA	NA	NA
NA	PFKFB4	NA	NA	NA	NA	NA	NA	NA	NA	NA	NA	NA	NA	NA
NA	PGC	NA	NA	NA	NA	NA	NA	NA	NA	NA	NA	NA	NA	NA
NA	PGM2L1	NA	NA	NA	NA	NA	NA	NA	NA	NA	NA	NA	NA	NA
NA	PGM5	NA	NA	NA	NA	NA	NA	NA	NA	NA	NA	NA	NA	NA
NA	PGRMC1	NA	NA	NA	NA	NA	NA	NA	NA	NA	NA	NA	NA	NA
NA	PGRMC2	NA	NA	NA	NA	NA	NA	NA	NA	NA	NA	NA	NA	NA
NA	PHACTR2	NA	NA	NA	NA	NA	NA	NA	NA	NA	NA	NA	NA	NA
NA	PHEX	NA	NA	NA	NA	NA	NA	NA	NA	NA	NA	NA	NA	NA
NA	PHKA1	NA	NA	NA	NA	NA	NA	NA	NA	NA	NA	NA	NA	NA
NA	PHLDA3	NA	NA	NA	NA	NA	NA	NA	NA	NA	NA	NA	NA	NA
NA	PHLDB1	NA	NA	NA	NA	NA	NA	NA	NA	NA	NA	NA	NA	NA
NA	PHLDB3	NA	NA	NA	NA	NA	NA	NA	NA	NA	NA	NA	NA	NA
NA	PI16	NA	NA	NA	NA	NA	NA	NA	NA	NA	NA	NA	NA	NA
NA	PI3	NA	NA	NA	NA	NA	NA	NA	NA	NA	NA	NA	NA	NA
NA	PICALM	NA	NA	NA	NA	NA	NA	NA	NA	NA	NA	NA	NA	NA
NA	PIGV	NA	NA	NA	NA	NA	NA	NA	NA	NA	NA	NA	NA	NA
NA	PIGZ	NA	NA	NA	NA	NA	NA	NA	NA	NA	NA	NA	NA	NA
NA	PIK3AP1	NA	NA	NA	NA	NA	NA	NA	NA	NA	NA	NA	NA	NA
NA	PIK3C3	NA	NA	NA	NA	NA	NA	NA	NA	NA	NA	NA	NA	NA
NA	PIK3CA	NA	NA	NA	NA	NA	NA	NA	NA	NA	NA	NA	NA	NA
NA	PIK3IP1	NA	NA	NA	NA	NA	NA	NA	NA	NA	NA	NA	NA	NA
NA	PIP4K2C	NA	NA	NA	NA	NA	NA	NA	NA	NA	NA	NA	NA	NA
NA	PIP5KL1	NA	NA	NA	NA	NA	NA	NA	NA	NA	NA	NA	NA	NA
NA	PITPNM3	NA	NA	NA	NA	NA	NA	NA	NA	NA	NA	NA	NA	NA
NA	PKP2	NA	NA	NA	NA	NA	NA	NA	NA	NA	NA	NA	NA	NA
NA	PLA2G15	NA	NA	NA	NA	NA	NA	NA	NA	NA	NA	NA	NA	NA
NA	PLA2G16	NA	NA	NA	NA	NA	NA	NA	NA	NA	NA	NA	NA	NA
NA	PLA2G4C	NA	NA	NA	NA	NA	NA	NA	NA	NA	NA	NA	NA	NA
NA	PLA2R1	NA	NA	NA	NA	NA	NA	NA	NA	NA	NA	NA	NA	NA
NA	PLAT	NA	NA	NA	NA	NA	NA	NA	NA	NA	NA	NA	NA	NA
NA	PLBD2	NA	NA	NA	NA	NA	NA	NA	NA	NA	NA	NA	NA	NA
NA	PLCB4	NA	NA	NA	NA	NA	NA	NA	NA	NA	NA	NA	NA	NA
NA	PLCE1	NA	NA	NA	NA	NA	NA	NA	NA	NA	NA	NA	NA	NA
NA	PLD3	NA	NA	NA	NA	NA	NA	NA	NA	NA	NA	NA	NA	NA
NA	PLEKHA1	NA	NA	NA	NA	NA	NA	NA	NA	NA	NA	NA	NA	NA
NA	PLEKHB2	NA	NA	NA	NA	NA	NA	NA	NA	NA	NA	NA	NA	NA
NA	PLK3	NA	NA	NA	NA	NA	NA	NA	NA	NA	NA	NA	NA	NA
NA	PLOD1	NA	NA	NA	NA	NA	NA	NA	NA	NA	NA	NA	NA	NA
NA	PLOD2	NA	NA	NA	NA	NA	NA	NA	NA	NA	NA	NA	NA	NA
NA	PLSCR4	NA	NA	NA	NA	NA	NA	NA	NA	NA	NA	NA	NA	NA
NA	PLXDC2	NA	NA	NA	NA	NA	NA	NA	NA	NA	NA	NA	NA	NA
NA	PLXNA1	NA	NA	NA	NA	NA	NA	NA	NA	NA	NA	NA	NA	NA
NA	PLXNA2	NA	NA	NA	NA	NA	NA	NA	NA	NA	NA	NA	NA	NA
NA	PLXNA3	NA	NA	NA	NA	NA	NA	NA	NA	NA	NA	NA	NA	NA
NA	PLXNB3	NA	NA	NA	NA	NA	NA	NA	NA	NA	NA	NA	NA	NA
NA	PLXND1	NA	NA	NA	NA	NA	NA	NA	NA	NA	NA	NA	NA	NA
NA	PMAIP1	NA	NA	NA	NA	NA	NA	NA	NA	NA	NA	NA	NA	NA
NA	PMEPA1	NA	NA	NA	NA	NA	NA	NA	NA	NA	NA	NA	NA	NA
NA	PNPLA2	NA	NA	NA	NA	NA	NA	NA	NA	NA	NA	NA	NA	NA
NA	PNRC1	NA	NA	NA	NA	NA	NA	NA	NA	NA	NA	NA	NA	NA
NA	POLD4	NA	NA	NA	NA	NA	NA	NA	NA	NA	NA	NA	NA	NA
NA	POLH	NA	NA	NA	NA	NA	NA	NA	NA	NA	NA	NA	NA	NA
NA	POMT1	NA	NA	NA	NA	NA	NA	NA	NA	NA	NA	NA	NA	NA
NA	PON2	NA	NA	NA	NA	NA	NA	NA	NA	NA	NA	NA	NA	NA
NA	PORCN	NA	NA	NA	NA	NA	NA	NA	NA	NA	NA	NA	NA	NA
NA	POU2F2	NA	NA	NA	NA	NA	NA	NA	NA	NA	NA	NA	NA	NA
NA	PPFIA1	NA	NA	NA	NA	NA	NA	NA	NA	NA	NA	NA	NA	NA
NA	PPFIA4	NA	NA	NA	NA	NA	NA	NA	NA	NA	NA	NA	NA	NA
NA	PPFIBP1	NA	NA	NA	NA	NA	NA	NA	NA	NA	NA	NA	NA	NA
NA	PPFIBP2	NA	NA	NA	NA	NA	NA	NA	NA	NA	NA	NA	NA	NA
NA	PPIC	NA	NA	NA	NA	NA	NA	NA	NA	NA	NA	NA	NA	NA
NA	PPM1K	NA	NA	NA	NA	NA	NA	NA	NA	NA	NA	NA	NA	NA
NA	PPME1	NA	NA	NA	NA	NA	NA	NA	NA	NA	NA	NA	NA	NA
NA	PPP1R13L	NA	NA	NA	NA	NA	NA	NA	NA	NA	NA	NA	NA	NA
NA	PPP1R14A	NA	NA	NA	NA	NA	NA	NA	NA	NA	NA	NA	NA	NA
NA	PPP1R16A	NA	NA	NA	NA	NA	NA	NA	NA	NA	NA	NA	NA	NA
NA	PPP1R2	NA	NA	NA	NA	NA	NA	NA	NA	NA	NA	NA	NA	NA
NA	PPP1R3C	NA	NA	NA	NA	NA	NA	NA	NA	NA	NA	NA	NA	NA
NA	PPP2R5B	NA	NA	NA	NA	NA	NA	NA	NA	NA	NA	NA	NA	NA
NA	PPP3CC	NA	NA	NA	NA	NA	NA	NA	NA	NA	NA	NA	NA	NA
NA	PPP4R4	NA	NA	NA	NA	NA	NA	NA	NA	NA	NA	NA	NA	NA
NA	PPP6R2	NA	NA	NA	NA	NA	NA	NA	NA	NA	NA	NA	NA	NA
NA	PRAF2	NA	NA	NA	NA	NA	NA	NA	NA	NA	NA	NA	NA	NA
NA	PRDM1	NA	NA	NA	NA	NA	NA	NA	NA	NA	NA	NA	NA	NA
NA	PRDX4	NA	NA	NA	NA	NA	NA	NA	NA	NA	NA	NA	NA	NA
NA	PRDX5	NA	NA	NA	NA	NA	NA	NA	NA	NA	NA	NA	NA	NA
NA	PRDX6	NA	NA	NA	NA	NA	NA	NA	NA	NA	NA	NA	NA	NA
NA	PRICKLE1	NA	NA	NA	NA	NA	NA	NA	NA	NA	NA	NA	NA	NA
NA	PRICKLE2	NA	NA	NA	NA	NA	NA	NA	NA	NA	NA	NA	NA	NA
NA	PRKAB2	NA	NA	NA	NA	NA	NA	NA	NA	NA	NA	NA	NA	NA
NA	PRKCH	NA	NA	NA	NA	NA	NA	NA	NA	NA	NA	NA	NA	NA
NA	PRLH	NA	NA	NA	NA	NA	NA	NA	NA	NA	NA	NA	NA	NA
NA	PRNP	NA	NA	NA	NA	NA	NA	NA	NA	NA	NA	NA	NA	NA
NA	PROK2	NA	NA	NA	NA	NA	NA	NA	NA	NA	NA	NA	NA	NA
NA	PROS1	NA	NA	NA	NA	NA	NA	NA	NA	NA	NA	NA	NA	NA
NA	PRPS1	NA	NA	NA	NA	NA	NA	NA	NA	NA	NA	NA	NA	NA
NA	PRR5L	NA	NA	NA	NA	NA	NA	NA	NA	NA	NA	NA	NA	NA
NA	PRRG1	NA	NA	NA	NA	NA	NA	NA	NA	NA	NA	NA	NA	NA
NA	PRSS23	NA	NA	NA	NA	NA	NA	NA	NA	NA	NA	NA	NA	NA
NA	PSAP	NA	NA	NA	NA	NA	NA	NA	NA	NA	NA	NA	NA	NA
NA	PSCA	NA	NA	NA	NA	NA	NA	NA	NA	NA	NA	NA	NA	NA
NA	PSD4	NA	NA	NA	NA	NA	NA	NA	NA	NA	NA	NA	NA	NA
NA	PSG1	NA	NA	NA	NA	NA	NA	NA	NA	NA	NA	NA	NA	NA
NA	PSG11	NA	NA	NA	NA	NA	NA	NA	NA	NA	NA	NA	NA	NA
NA	PSG2	NA	NA	NA	NA	NA	NA	NA	NA	NA	NA	NA	NA	NA
NA	PSG3	NA	NA	NA	NA	NA	NA	NA	NA	NA	NA	NA	NA	NA
NA	PSG9	NA	NA	NA	NA	NA	NA	NA	NA	NA	NA	NA	NA	NA
NA	PSPN	NA	NA	NA	NA	NA	NA	NA	NA	NA	NA	NA	NA	NA
NA	PSTPIP2	NA	NA	NA	NA	NA	NA	NA	NA	NA	NA	NA	NA	NA
NA	PTGFR	NA	NA	NA	NA	NA	NA	NA	NA	NA	NA	NA	NA	NA
NA	PTGFRN	NA	NA	NA	NA	NA	NA	NA	NA	NA	NA	NA	NA	NA
NA	PTGIR	NA	NA	NA	NA	NA	NA	NA	NA	NA	NA	NA	NA	NA
NA	PTGS2	NA	NA	NA	NA	NA	NA	NA	NA	NA	NA	NA	NA	NA
NA	PTHLH	NA	NA	NA	NA	NA	NA	NA	NA	NA	NA	NA	NA	NA
NA	PTP4A1	NA	NA	NA	NA	NA	NA	NA	NA	NA	NA	NA	NA	NA
NA	PTP4A3	NA	NA	NA	NA	NA	NA	NA	NA	NA	NA	NA	NA	NA
NA	PTPN13	NA	NA	NA	NA	NA	NA	NA	NA	NA	NA	NA	NA	NA
NA	PTPRB	NA	NA	NA	NA	NA	NA	NA	NA	NA	NA	NA	NA	NA
NA	PTPRE	NA	NA	NA	NA	NA	NA	NA	NA	NA	NA	NA	NA	NA
NA	PTPRF	NA	NA	NA	NA	NA	NA	NA	NA	NA	NA	NA	NA	NA
NA	PTPRK	NA	NA	NA	NA	NA	NA	NA	NA	NA	NA	NA	NA	NA
NA	PTPRM	NA	NA	NA	NA	NA	NA	NA	NA	NA	NA	NA	NA	NA
NA	PTPRU	NA	NA	NA	NA	NA	NA	NA	NA	NA	NA	NA	NA	NA
NA	PURA	NA	NA	NA	NA	NA	NA	NA	NA	NA	NA	NA	NA	NA
NA	PXDNL	NA	NA	NA	NA	NA	NA	NA	NA	NA	NA	NA	NA	NA
NA	PYGB	NA	NA	NA	NA	NA	NA	NA	NA	NA	NA	NA	NA	NA
NA	PYGL	NA	NA	NA	NA	NA	NA	NA	NA	NA	NA	NA	NA	NA
NA	QPCT	NA	NA	NA	NA	NA	NA	NA	NA	NA	NA	NA	NA	NA
NA	QPCTL	NA	NA	NA	NA	NA	NA	NA	NA	NA	NA	NA	NA	NA
NA	QPRT	NA	NA	NA	NA	NA	NA	NA	NA	NA	NA	NA	NA	NA
NA	RAB11A	NA	NA	NA	NA	NA	NA	NA	NA	NA	NA	NA	NA	NA
NA	RAB11FIP5	NA	NA	NA	NA	NA	NA	NA	NA	NA	NA	NA	NA	NA
NA	RAB26	NA	NA	NA	NA	NA	NA	NA	NA	NA	NA	NA	NA	NA
NA	RAB33B	NA	NA	NA	NA	NA	NA	NA	NA	NA	NA	NA	NA	NA
NA	RAB3A	NA	NA	NA	NA	NA	NA	NA	NA	NA	NA	NA	NA	NA
NA	RAB40B	NA	NA	NA	NA	NA	NA	NA	NA	NA	NA	NA	NA	NA
NA	RAB5A	NA	NA	NA	NA	NA	NA	NA	NA	NA	NA	NA	NA	NA
NA	RAB6B	NA	NA	NA	NA	NA	NA	NA	NA	NA	NA	NA	NA	NA
NA	RABGAP1L	NA	NA	NA	NA	NA	NA	NA	NA	NA	NA	NA	NA	NA
NA	RAI14	NA	NA	NA	NA	NA	NA	NA	NA	NA	NA	NA	NA	NA
NA	RAP1GAP2	NA	NA	NA	NA	NA	NA	NA	NA	NA	NA	NA	NA	NA
NA	RAPGEF2	NA	NA	NA	NA	NA	NA	NA	NA	NA	NA	NA	NA	NA
NA	RAPGEF3	NA	NA	NA	NA	NA	NA	NA	NA	NA	NA	NA	NA	NA
NA	RAPH1	NA	NA	NA	NA	NA	NA	NA	NA	NA	NA	NA	NA	NA
NA	RASA2	NA	NA	NA	NA	NA	NA	NA	NA	NA	NA	NA	NA	NA
NA	RASA4	NA	NA	NA	NA	NA	NA	NA	NA	NA	NA	NA	NA	NA
NA	RASGRP1	NA	NA	NA	NA	NA	NA	NA	NA	NA	NA	NA	NA	NA
NA	RASSF7	NA	NA	NA	NA	NA	NA	NA	NA	NA	NA	NA	NA	NA
NA	RBM24	NA	NA	NA	NA	NA	NA	NA	NA	NA	NA	NA	NA	NA
NA	RBMS1	NA	NA	NA	NA	NA	NA	NA	NA	NA	NA	NA	NA	NA
NA	RBMS2	NA	NA	NA	NA	NA	NA	NA	NA	NA	NA	NA	NA	NA
NA	RBP5	NA	NA	NA	NA	NA	NA	NA	NA	NA	NA	NA	NA	NA
NA	RCAN1	NA	NA	NA	NA	NA	NA	NA	NA	NA	NA	NA	NA	NA
NA	RCOR3	NA	NA	NA	NA	NA	NA	NA	NA	NA	NA	NA	NA	NA
NA	RDH10	NA	NA	NA	NA	NA	NA	NA	NA	NA	NA	NA	NA	NA
NA	RECK	NA	NA	NA	NA	NA	NA	NA	NA	NA	NA	NA	NA	NA
NA	REEP2	NA	NA	NA	NA	NA	NA	NA	NA	NA	NA	NA	NA	NA
NA	REEP3	NA	NA	NA	NA	NA	NA	NA	NA	NA	NA	NA	NA	NA
NA	REEP5	NA	NA	NA	NA	NA	NA	NA	NA	NA	NA	NA	NA	NA
NA	REEP6	NA	NA	NA	NA	NA	NA	NA	NA	NA	NA	NA	NA	NA
NA	REN	NA	NA	NA	NA	NA	NA	NA	NA	NA	NA	NA	NA	NA
NA	RETSAT	NA	NA	NA	NA	NA	NA	NA	NA	NA	NA	NA	NA	NA
NA	RFTN1	NA	NA	NA	NA	NA	NA	NA	NA	NA	NA	NA	NA	NA
NA	RGL3	NA	NA	NA	NA	NA	NA	NA	NA	NA	NA	NA	NA	NA
NA	RGS11	NA	NA	NA	NA	NA	NA	NA	NA	NA	NA	NA	NA	NA
NA	RGS4	NA	NA	NA	NA	NA	NA	NA	NA	NA	NA	NA	NA	NA
NA	RGS5	NA	NA	NA	NA	NA	NA	NA	NA	NA	NA	NA	NA	NA
NA	RGS9	NA	NA	NA	NA	NA	NA	NA	NA	NA	NA	NA	NA	NA
NA	RHBDD2	NA	NA	NA	NA	NA	NA	NA	NA	NA	NA	NA	NA	NA
NA	RHBDF1	NA	NA	NA	NA	NA	NA	NA	NA	NA	NA	NA	NA	NA
NA	RHBDF2	NA	NA	NA	NA	NA	NA	NA	NA	NA	NA	NA	NA	NA
NA	RHBDL2	NA	NA	NA	NA	NA	NA	NA	NA	NA	NA	NA	NA	NA
NA	RHCG	NA	NA	NA	NA	NA	NA	NA	NA	NA	NA	NA	NA	NA
NA	RHD	NA	NA	NA	NA	NA	NA	NA	NA	NA	NA	NA	NA	NA
NA	RHOC	NA	NA	NA	NA	NA	NA	NA	NA	NA	NA	NA	NA	NA
NA	RHOJ	NA	NA	NA	NA	NA	NA	NA	NA	NA	NA	NA	NA	NA
NA	RHOQ	NA	NA	NA	NA	NA	NA	NA	NA	NA	NA	NA	NA	NA
NA	RHOV	NA	NA	NA	NA	NA	NA	NA	NA	NA	NA	NA	NA	NA
NA	RIMS1	NA	NA	NA	NA	NA	NA	NA	NA	NA	NA	NA	NA	NA
NA	RIN2	NA	NA	NA	NA	NA	NA	NA	NA	NA	NA	NA	NA	NA
NA	RIOK3	NA	NA	NA	NA	NA	NA	NA	NA	NA	NA	NA	NA	NA
NA	RIT1	NA	NA	NA	NA	NA	NA	NA	NA	NA	NA	NA	NA	NA
NA	RNASET2	NA	NA	NA	NA	NA	NA	NA	NA	NA	NA	NA	NA	NA
NA	RNF11	NA	NA	NA	NA	NA	NA	NA	NA	NA	NA	NA	NA	NA
NA	RNF13	NA	NA	NA	NA	NA	NA	NA	NA	NA	NA	NA	NA	NA
NA	RNF14	NA	NA	NA	NA	NA	NA	NA	NA	NA	NA	NA	NA	NA
NA	RNF141	NA	NA	NA	NA	NA	NA	NA	NA	NA	NA	NA	NA	NA
NA	RNF144B	NA	NA	NA	NA	NA	NA	NA	NA	NA	NA	NA	NA	NA
NA	RNF150	NA	NA	NA	NA	NA	NA	NA	NA	NA	NA	NA	NA	NA
NA	RNF152	NA	NA	NA	NA	NA	NA	NA	NA	NA	NA	NA	NA	NA
NA	RNF170	NA	NA	NA	NA	NA	NA	NA	NA	NA	NA	NA	NA	NA
NA	RNF181	NA	NA	NA	NA	NA	NA	NA	NA	NA	NA	NA	NA	NA
NA	RNF19A	NA	NA	NA	NA	NA	NA	NA	NA	NA	NA	NA	NA	NA
NA	RNF24	NA	NA	NA	NA	NA	NA	NA	NA	NA	NA	NA	NA	NA
NA	ROGDI	NA	NA	NA	NA	NA	NA	NA	NA	NA	NA	NA	NA	NA
NA	ROMO1	NA	NA	NA	NA	NA	NA	NA	NA	NA	NA	NA	NA	NA
NA	ROR1	NA	NA	NA	NA	NA	NA	NA	NA	NA	NA	NA	NA	NA
NA	RORA	NA	NA	NA	NA	NA	NA	NA	NA	NA	NA	NA	NA	NA
NA	RPL3L	NA	NA	NA	NA	NA	NA	NA	NA	NA	NA	NA	NA	NA
NA	RPRM	NA	NA	NA	NA	NA	NA	NA	NA	NA	NA	NA	NA	NA
NA	RPS27L	NA	NA	NA	NA	NA	NA	NA	NA	NA	NA	NA	NA	NA
NA	RPS6KL1	NA	NA	NA	NA	NA	NA	NA	NA	NA	NA	NA	NA	NA
NA	RRAD	NA	NA	NA	NA	NA	NA	NA	NA	NA	NA	NA	NA	NA
NA	RRAGC	NA	NA	NA	NA	NA	NA	NA	NA	NA	NA	NA	NA	NA
NA	RRAS	NA	NA	NA	NA	NA	NA	NA	NA	NA	NA	NA	NA	NA
NA	RRM2B	NA	NA	NA	NA	NA	NA	NA	NA	NA	NA	NA	NA	NA
NA	RSPH3	NA	NA	NA	NA	NA	NA	NA	NA	NA	NA	NA	NA	NA
NA	RSPO1	NA	NA	NA	NA	NA	NA	NA	NA	NA	NA	NA	NA	NA
NA	RSU1	NA	NA	NA	NA	NA	NA	NA	NA	NA	NA	NA	NA	NA
NA	RTN1	NA	NA	NA	NA	NA	NA	NA	NA	NA	NA	NA	NA	NA
NA	RUNX1	NA	NA	NA	NA	NA	NA	NA	NA	NA	NA	NA	NA	NA
NA	RUSC2	NA	NA	NA	NA	NA	NA	NA	NA	NA	NA	NA	NA	NA
NA	RWDD2A	NA	NA	NA	NA	NA	NA	NA	NA	NA	NA	NA	NA	NA
NA	SAA2	NA	NA	NA	NA	NA	NA	NA	NA	NA	NA	NA	NA	NA
NA	SAMD10	NA	NA	NA	NA	NA	NA	NA	NA	NA	NA	NA	NA	NA
NA	SAMD12	NA	NA	NA	NA	NA	NA	NA	NA	NA	NA	NA	NA	NA
NA	SAMD14	NA	NA	NA	NA	NA	NA	NA	NA	NA	NA	NA	NA	NA
NA	SAMD3	NA	NA	NA	NA	NA	NA	NA	NA	NA	NA	NA	NA	NA
NA	SAMD4A	NA	NA	NA	NA	NA	NA	NA	NA	NA	NA	NA	NA	NA
NA	SAMD9	NA	NA	NA	NA	NA	NA	NA	NA	NA	NA	NA	NA	NA
NA	SAMD9L	NA	NA	NA	NA	NA	NA	NA	NA	NA	NA	NA	NA	NA
NA	SASH1	NA	NA	NA	NA	NA	NA	NA	NA	NA	NA	NA	NA	NA
NA	SAT1	NA	NA	NA	NA	NA	NA	NA	NA	NA	NA	NA	NA	NA
NA	SATB1	NA	NA	NA	NA	NA	NA	NA	NA	NA	NA	NA	NA	NA
NA	SBDS	NA	NA	NA	NA	NA	NA	NA	NA	NA	NA	NA	NA	NA
NA	SCAMP1	NA	NA	NA	NA	NA	NA	NA	NA	NA	NA	NA	NA	NA
NA	SCAMP5	NA	NA	NA	NA	NA	NA	NA	NA	NA	NA	NA	NA	NA
NA	SCD5	NA	NA	NA	NA	NA	NA	NA	NA	NA	NA	NA	NA	NA
NA	SCG2	NA	NA	NA	NA	NA	NA	NA	NA	NA	NA	NA	NA	NA
NA	SCG5	NA	NA	NA	NA	NA	NA	NA	NA	NA	NA	NA	NA	NA
NA	SCGB2A1	NA	NA	NA	NA	NA	NA	NA	NA	NA	NA	NA	NA	NA
NA	SCIN	NA	NA	NA	NA	NA	NA	NA	NA	NA	NA	NA	NA	NA
NA	SCN2A	NA	NA	NA	NA	NA	NA	NA	NA	NA	NA	NA	NA	NA
NA	SCN8A	NA	NA	NA	NA	NA	NA	NA	NA	NA	NA	NA	NA	NA
NA	SCOC	NA	NA	NA	NA	NA	NA	NA	NA	NA	NA	NA	NA	NA
NA	SCUBE3	NA	NA	NA	NA	NA	NA	NA	NA	NA	NA	NA	NA	NA
NA	SDF2	NA	NA	NA	NA	NA	NA	NA	NA	NA	NA	NA	NA	NA
NA	SDF4	NA	NA	NA	NA	NA	NA	NA	NA	NA	NA	NA	NA	NA
NA	SEC14L1	NA	NA	NA	NA	NA	NA	NA	NA	NA	NA	NA	NA	NA
NA	SEC14L2	NA	NA	NA	NA	NA	NA	NA	NA	NA	NA	NA	NA	NA
NA	SEL1L3	NA	NA	NA	NA	NA	NA	NA	NA	NA	NA	NA	NA	NA
NA	SEMA3C	NA	NA	NA	NA	NA	NA	NA	NA	NA	NA	NA	NA	NA
NA	SEMA4F	NA	NA	NA	NA	NA	NA	NA	NA	NA	NA	NA	NA	NA
NA	SEMA5A	NA	NA	NA	NA	NA	NA	NA	NA	NA	NA	NA	NA	NA
NA	SEMA6A	NA	NA	NA	NA	NA	NA	NA	NA	NA	NA	NA	NA	NA
NA	SEMA6D	NA	NA	NA	NA	NA	NA	NA	NA	NA	NA	NA	NA	NA
NA	SERINC1	NA	NA	NA	NA	NA	NA	NA	NA	NA	NA	NA	NA	NA
NA	SERINC2	NA	NA	NA	NA	NA	NA	NA	NA	NA	NA	NA	NA	NA
NA	SERINC3	NA	NA	NA	NA	NA	NA	NA	NA	NA	NA	NA	NA	NA
NA	SERINC5	NA	NA	NA	NA	NA	NA	NA	NA	NA	NA	NA	NA	NA
NA	SERPINA1	NA	NA	NA	NA	NA	NA	NA	NA	NA	NA	NA	NA	NA
NA	SERPINA11	NA	NA	NA	NA	NA	NA	NA	NA	NA	NA	NA	NA	NA
NA	SERPINA3	NA	NA	NA	NA	NA	NA	NA	NA	NA	NA	NA	NA	NA
NA	SERPINA9	NA	NA	NA	NA	NA	NA	NA	NA	NA	NA	NA	NA	NA
NA	SERPINB7	NA	NA	NA	NA	NA	NA	NA	NA	NA	NA	NA	NA	NA
NA	SERPINB8	NA	NA	NA	NA	NA	NA	NA	NA	NA	NA	NA	NA	NA
NA	SERPINE1	NA	NA	NA	NA	NA	NA	NA	NA	NA	NA	NA	NA	NA
NA	SERPINE2	NA	NA	NA	NA	NA	NA	NA	NA	NA	NA	NA	NA	NA
NA	SERPINI1	NA	NA	NA	NA	NA	NA	NA	NA	NA	NA	NA	NA	NA
NA	SERTAD4	NA	NA	NA	NA	NA	NA	NA	NA	NA	NA	NA	NA	NA
NA	SESN1	NA	NA	NA	NA	NA	NA	NA	NA	NA	NA	NA	NA	NA
NA	SETD7	NA	NA	NA	NA	NA	NA	NA	NA	NA	NA	NA	NA	NA
NA	SEZ6L2	NA	NA	NA	NA	NA	NA	NA	NA	NA	NA	NA	NA	NA
NA	SFRP1	NA	NA	NA	NA	NA	NA	NA	NA	NA	NA	NA	NA	NA
NA	SFXN3	NA	NA	NA	NA	NA	NA	NA	NA	NA	NA	NA	NA	NA
NA	SGCB	NA	NA	NA	NA	NA	NA	NA	NA	NA	NA	NA	NA	NA
NA	SGIP1	NA	NA	NA	NA	NA	NA	NA	NA	NA	NA	NA	NA	NA
NA	SGK1	NA	NA	NA	NA	NA	NA	NA	NA	NA	NA	NA	NA	NA
NA	SGMS2	NA	NA	NA	NA	NA	NA	NA	NA	NA	NA	NA	NA	NA
NA	SGPP1	NA	NA	NA	NA	NA	NA	NA	NA	NA	NA	NA	NA	NA
NA	SGSH	NA	NA	NA	NA	NA	NA	NA	NA	NA	NA	NA	NA	NA
NA	SGTB	NA	NA	NA	NA	NA	NA	NA	NA	NA	NA	NA	NA	NA
NA	SH2D3A	NA	NA	NA	NA	NA	NA	NA	NA	NA	NA	NA	NA	NA
NA	SH3BGRL	NA	NA	NA	NA	NA	NA	NA	NA	NA	NA	NA	NA	NA
NA	SH3BGRL2	NA	NA	NA	NA	NA	NA	NA	NA	NA	NA	NA	NA	NA
NA	SH3BP5L	NA	NA	NA	NA	NA	NA	NA	NA	NA	NA	NA	NA	NA
NA	SH3GLB1	NA	NA	NA	NA	NA	NA	NA	NA	NA	NA	NA	NA	NA
NA	SH3PXD2A	NA	NA	NA	NA	NA	NA	NA	NA	NA	NA	NA	NA	NA
NA	SH3RF1	NA	NA	NA	NA	NA	NA	NA	NA	NA	NA	NA	NA	NA
NA	SH3RF2	NA	NA	NA	NA	NA	NA	NA	NA	NA	NA	NA	NA	NA
NA	SH3TC2	NA	NA	NA	NA	NA	NA	NA	NA	NA	NA	NA	NA	NA
NA	SHANK1	NA	NA	NA	NA	NA	NA	NA	NA	NA	NA	NA	NA	NA
NA	SHB	NA	NA	NA	NA	NA	NA	NA	NA	NA	NA	NA	NA	NA
NA	SHBG	NA	NA	NA	NA	NA	NA	NA	NA	NA	NA	NA	NA	NA
NA	SHC3	NA	NA	NA	NA	NA	NA	NA	NA	NA	NA	NA	NA	NA
NA	SHC4	NA	NA	NA	NA	NA	NA	NA	NA	NA	NA	NA	NA	NA
NA	SHOX2	NA	NA	NA	NA	NA	NA	NA	NA	NA	NA	NA	NA	NA
NA	SHROOM3	NA	NA	NA	NA	NA	NA	NA	NA	NA	NA	NA	NA	NA
NA	SHROOM4	NA	NA	NA	NA	NA	NA	NA	NA	NA	NA	NA	NA	NA
NA	SIL1	NA	NA	NA	NA	NA	NA	NA	NA	NA	NA	NA	NA	NA
NA	SIPA1L1	NA	NA	NA	NA	NA	NA	NA	NA	NA	NA	NA	NA	NA
NA	SLA	NA	NA	NA	NA	NA	NA	NA	NA	NA	NA	NA	NA	NA
NA	SLAMF8	NA	NA	NA	NA	NA	NA	NA	NA	NA	NA	NA	NA	NA
NA	SLC10A3	NA	NA	NA	NA	NA	NA	NA	NA	NA	NA	NA	NA	NA
NA	SLC10A6	NA	NA	NA	NA	NA	NA	NA	NA	NA	NA	NA	NA	NA
NA	SLC12A4	NA	NA	NA	NA	NA	NA	NA	NA	NA	NA	NA	NA	NA
NA	SLC15A4	NA	NA	NA	NA	NA	NA	NA	NA	NA	NA	NA	NA	NA
NA	SLC16A2	NA	NA	NA	NA	NA	NA	NA	NA	NA	NA	NA	NA	NA
NA	SLC16A3	NA	NA	NA	NA	NA	NA	NA	NA	NA	NA	NA	NA	NA
NA	SLC17A5	NA	NA	NA	NA	NA	NA	NA	NA	NA	NA	NA	NA	NA
NA	SLC19A2	NA	NA	NA	NA	NA	NA	NA	NA	NA	NA	NA	NA	NA
NA	SLC1A1	NA	NA	NA	NA	NA	NA	NA	NA	NA	NA	NA	NA	NA
NA	SLC1A7	NA	NA	NA	NA	NA	NA	NA	NA	NA	NA	NA	NA	NA
NA	SLC20A1	NA	NA	NA	NA	NA	NA	NA	NA	NA	NA	NA	NA	NA
NA	SLC20A2	NA	NA	NA	NA	NA	NA	NA	NA	NA	NA	NA	NA	NA
NA	SLC22A13	NA	NA	NA	NA	NA	NA	NA	NA	NA	NA	NA	NA	NA
NA	SLC22A15	NA	NA	NA	NA	NA	NA	NA	NA	NA	NA	NA	NA	NA
NA	SLC22A18	NA	NA	NA	NA	NA	NA	NA	NA	NA	NA	NA	NA	NA
NA	SLC22A23	NA	NA	NA	NA	NA	NA	NA	NA	NA	NA	NA	NA	NA
NA	SLC22A4	NA	NA	NA	NA	NA	NA	NA	NA	NA	NA	NA	NA	NA
NA	SLC22A5	NA	NA	NA	NA	NA	NA	NA	NA	NA	NA	NA	NA	NA
NA	SLC24A4	NA	NA	NA	NA	NA	NA	NA	NA	NA	NA	NA	NA	NA
NA	SLC25A20	NA	NA	NA	NA	NA	NA	NA	NA	NA	NA	NA	NA	NA
NA	SLC25A23	NA	NA	NA	NA	NA	NA	NA	NA	NA	NA	NA	NA	NA
NA	SLC25A4	NA	NA	NA	NA	NA	NA	NA	NA	NA	NA	NA	NA	NA
NA	SLC25A45	NA	NA	NA	NA	NA	NA	NA	NA	NA	NA	NA	NA	NA
NA	SLC26A1	NA	NA	NA	NA	NA	NA	NA	NA	NA	NA	NA	NA	NA
NA	SLC26A2	NA	NA	NA	NA	NA	NA	NA	NA	NA	NA	NA	NA	NA
NA	SLC27A4	NA	NA	NA	NA	NA	NA	NA	NA	NA	NA	NA	NA	NA
NA	SLC2A1	NA	NA	NA	NA	NA	NA	NA	NA	NA	NA	NA	NA	NA
NA	SLC2A10	NA	NA	NA	NA	NA	NA	NA	NA	NA	NA	NA	NA	NA
NA	SLC2A11	NA	NA	NA	NA	NA	NA	NA	NA	NA	NA	NA	NA	NA
NA	SLC2A13	NA	NA	NA	NA	NA	NA	NA	NA	NA	NA	NA	NA	NA
NA	SLC2A14	NA	NA	NA	NA	NA	NA	NA	NA	NA	NA	NA	NA	NA
NA	SLC2A6	NA	NA	NA	NA	NA	NA	NA	NA	NA	NA	NA	NA	NA
NA	SLC2A9	NA	NA	NA	NA	NA	NA	NA	NA	NA	NA	NA	NA	NA
NA	SLC30A4	NA	NA	NA	NA	NA	NA	NA	NA	NA	NA	NA	NA	NA
NA	SLC31A2	NA	NA	NA	NA	NA	NA	NA	NA	NA	NA	NA	NA	NA
NA	SLC33A1	NA	NA	NA	NA	NA	NA	NA	NA	NA	NA	NA	NA	NA
NA	SLC35A1	NA	NA	NA	NA	NA	NA	NA	NA	NA	NA	NA	NA	NA
NA	SLC35A3	NA	NA	NA	NA	NA	NA	NA	NA	NA	NA	NA	NA	NA
NA	SLC35B3	NA	NA	NA	NA	NA	NA	NA	NA	NA	NA	NA	NA	NA
NA	SLC35E1	NA	NA	NA	NA	NA	NA	NA	NA	NA	NA	NA	NA	NA
NA	SLC35E3	NA	NA	NA	NA	NA	NA	NA	NA	NA	NA	NA	NA	NA
NA	SLC35F3	NA	NA	NA	NA	NA	NA	NA	NA	NA	NA	NA	NA	NA
NA	SLC35F5	NA	NA	NA	NA	NA	NA	NA	NA	NA	NA	NA	NA	NA
NA	SLC36A1	NA	NA	NA	NA	NA	NA	NA	NA	NA	NA	NA	NA	NA
NA	SLC38A11	NA	NA	NA	NA	NA	NA	NA	NA	NA	NA	NA	NA	NA
NA	SLC38A7	NA	NA	NA	NA	NA	NA	NA	NA	NA	NA	NA	NA	NA
NA	SLC38A9	NA	NA	NA	NA	NA	NA	NA	NA	NA	NA	NA	NA	NA
NA	SLC39A10	NA	NA	NA	NA	NA	NA	NA	NA	NA	NA	NA	NA	NA
NA	SLC39A13	NA	NA	NA	NA	NA	NA	NA	NA	NA	NA	NA	NA	NA
NA	SLC39A6	NA	NA	NA	NA	NA	NA	NA	NA	NA	NA	NA	NA	NA
NA	SLC39A8	NA	NA	NA	NA	NA	NA	NA	NA	NA	NA	NA	NA	NA
NA	SLC41A2	NA	NA	NA	NA	NA	NA	NA	NA	NA	NA	NA	NA	NA
NA	SLC43A2	NA	NA	NA	NA	NA	NA	NA	NA	NA	NA	NA	NA	NA
NA	SLC44A3	NA	NA	NA	NA	NA	NA	NA	NA	NA	NA	NA	NA	NA
NA	SLC45A4	NA	NA	NA	NA	NA	NA	NA	NA	NA	NA	NA	NA	NA
NA	SLC46A3	NA	NA	NA	NA	NA	NA	NA	NA	NA	NA	NA	NA	NA
NA	SLC47A1	NA	NA	NA	NA	NA	NA	NA	NA	NA	NA	NA	NA	NA
NA	SLC4A11	NA	NA	NA	NA	NA	NA	NA	NA	NA	NA	NA	NA	NA
NA	SLC4A3	NA	NA	NA	NA	NA	NA	NA	NA	NA	NA	NA	NA	NA
NA	SLC4A5	NA	NA	NA	NA	NA	NA	NA	NA	NA	NA	NA	NA	NA
NA	SLC4A9	NA	NA	NA	NA	NA	NA	NA	NA	NA	NA	NA	NA	NA
NA	SLC5A3	NA	NA	NA	NA	NA	NA	NA	NA	NA	NA	NA	NA	NA
NA	SLC6A18	NA	NA	NA	NA	NA	NA	NA	NA	NA	NA	NA	NA	NA
NA	SLC6A4	NA	NA	NA	NA	NA	NA	NA	NA	NA	NA	NA	NA	NA
NA	SLC6A6	NA	NA	NA	NA	NA	NA	NA	NA	NA	NA	NA	NA	NA
NA	SLC7A5	NA	NA	NA	NA	NA	NA	NA	NA	NA	NA	NA	NA	NA
NA	SLC9A3R2	NA	NA	NA	NA	NA	NA	NA	NA	NA	NA	NA	NA	NA
NA	SLC9A7	NA	NA	NA	NA	NA	NA	NA	NA	NA	NA	NA	NA	NA
NA	SLCO2A1	NA	NA	NA	NA	NA	NA	NA	NA	NA	NA	NA	NA	NA
NA	SLFN5	NA	NA	NA	NA	NA	NA	NA	NA	NA	NA	NA	NA	NA
NA	SLURP1	NA	NA	NA	NA	NA	NA	NA	NA	NA	NA	NA	NA	NA
NA	SMOC1	NA	NA	NA	NA	NA	NA	NA	NA	NA	NA	NA	NA	NA
NA	SMPD1	NA	NA	NA	NA	NA	NA	NA	NA	NA	NA	NA	NA	NA
NA	SMURF2	NA	NA	NA	NA	NA	NA	NA	NA	NA	NA	NA	NA	NA
NA	SNAPC3	NA	NA	NA	NA	NA	NA	NA	NA	NA	NA	NA	NA	NA
NA	SNORA37	NA	NA	NA	NA	NA	NA	NA	NA	NA	NA	NA	NA	NA
NA	SNORA60	NA	NA	NA	NA	NA	NA	NA	NA	NA	NA	NA	NA	NA
NA	SNTA1	NA	NA	NA	NA	NA	NA	NA	NA	NA	NA	NA	NA	NA
NA	SNX24	NA	NA	NA	NA	NA	NA	NA	NA	NA	NA	NA	NA	NA
NA	SNX25	NA	NA	NA	NA	NA	NA	NA	NA	NA	NA	NA	NA	NA
NA	SOHLH1	NA	NA	NA	NA	NA	NA	NA	NA	NA	NA	NA	NA	NA
NA	SORBS1	NA	NA	NA	NA	NA	NA	NA	NA	NA	NA	NA	NA	NA
NA	SORCS2	NA	NA	NA	NA	NA	NA	NA	NA	NA	NA	NA	NA	NA
NA	SORT1	NA	NA	NA	NA	NA	NA	NA	NA	NA	NA	NA	NA	NA
NA	SP100	NA	NA	NA	NA	NA	NA	NA	NA	NA	NA	NA	NA	NA
NA	SPAG4	NA	NA	NA	NA	NA	NA	NA	NA	NA	NA	NA	NA	NA
NA	SPARC	NA	NA	NA	NA	NA	NA	NA	NA	NA	NA	NA	NA	NA
NA	SPATA18	NA	NA	NA	NA	NA	NA	NA	NA	NA	NA	NA	NA	NA
NA	SPATA20	NA	NA	NA	NA	NA	NA	NA	NA	NA	NA	NA	NA	NA
NA	SPATA22	NA	NA	NA	NA	NA	NA	NA	NA	NA	NA	NA	NA	NA
NA	SPINT2	NA	NA	NA	NA	NA	NA	NA	NA	NA	NA	NA	NA	NA
NA	SPNS2	NA	NA	NA	NA	NA	NA	NA	NA	NA	NA	NA	NA	NA
NA	SPOCK1	NA	NA	NA	NA	NA	NA	NA	NA	NA	NA	NA	NA	NA
NA	SPRN	NA	NA	NA	NA	NA	NA	NA	NA	NA	NA	NA	NA	NA
NA	SPRY3	NA	NA	NA	NA	NA	NA	NA	NA	NA	NA	NA	NA	NA
NA	SPRYD3	NA	NA	NA	NA	NA	NA	NA	NA	NA	NA	NA	NA	NA
NA	SPTAN1	NA	NA	NA	NA	NA	NA	NA	NA	NA	NA	NA	NA	NA
NA	SRD5A1	NA	NA	NA	NA	NA	NA	NA	NA	NA	NA	NA	NA	NA
NA	SRD5A3	NA	NA	NA	NA	NA	NA	NA	NA	NA	NA	NA	NA	NA
NA	SRGN	NA	NA	NA	NA	NA	NA	NA	NA	NA	NA	NA	NA	NA
NA	SRPK3	NA	NA	NA	NA	NA	NA	NA	NA	NA	NA	NA	NA	NA
NA	SRPX	NA	NA	NA	NA	NA	NA	NA	NA	NA	NA	NA	NA	NA
NA	SRPX2	NA	NA	NA	NA	NA	NA	NA	NA	NA	NA	NA	NA	NA
NA	SSC5D	NA	NA	NA	NA	NA	NA	NA	NA	NA	NA	NA	NA	NA
NA	ST3GAL5	NA	NA	NA	NA	NA	NA	NA	NA	NA	NA	NA	NA	NA
NA	ST3GAL6	NA	NA	NA	NA	NA	NA	NA	NA	NA	NA	NA	NA	NA
NA	ST6GALNAC5	NA	NA	NA	NA	NA	NA	NA	NA	NA	NA	NA	NA	NA
NA	STARD4	NA	NA	NA	NA	NA	NA	NA	NA	NA	NA	NA	NA	NA
NA	STC2	NA	NA	NA	NA	NA	NA	NA	NA	NA	NA	NA	NA	NA
NA	STIM1	NA	NA	NA	NA	NA	NA	NA	NA	NA	NA	NA	NA	NA
NA	STK10	NA	NA	NA	NA	NA	NA	NA	NA	NA	NA	NA	NA	NA
NA	STK17A	NA	NA	NA	NA	NA	NA	NA	NA	NA	NA	NA	NA	NA
NA	STK38	NA	NA	NA	NA	NA	NA	NA	NA	NA	NA	NA	NA	NA
NA	STK38L	NA	NA	NA	NA	NA	NA	NA	NA	NA	NA	NA	NA	NA
NA	STS	NA	NA	NA	NA	NA	NA	NA	NA	NA	NA	NA	NA	NA
NA	STX11	NA	NA	NA	NA	NA	NA	NA	NA	NA	NA	NA	NA	NA
NA	STX12	NA	NA	NA	NA	NA	NA	NA	NA	NA	NA	NA	NA	NA
NA	STX3	NA	NA	NA	NA	NA	NA	NA	NA	NA	NA	NA	NA	NA
NA	STX4	NA	NA	NA	NA	NA	NA	NA	NA	NA	NA	NA	NA	NA
NA	STX7	NA	NA	NA	NA	NA	NA	NA	NA	NA	NA	NA	NA	NA
NA	STXBP1	NA	NA	NA	NA	NA	NA	NA	NA	NA	NA	NA	NA	NA
NA	STXBP3	NA	NA	NA	NA	NA	NA	NA	NA	NA	NA	NA	NA	NA
NA	STXBP6	NA	NA	NA	NA	NA	NA	NA	NA	NA	NA	NA	NA	NA
NA	STYK1	NA	NA	NA	NA	NA	NA	NA	NA	NA	NA	NA	NA	NA
NA	SVEP1	NA	NA	NA	NA	NA	NA	NA	NA	NA	NA	NA	NA	NA
NA	SVIL	NA	NA	NA	NA	NA	NA	NA	NA	NA	NA	NA	NA	NA
NA	SYNGR2	NA	NA	NA	NA	NA	NA	NA	NA	NA	NA	NA	NA	NA
NA	SYNPO2L	NA	NA	NA	NA	NA	NA	NA	NA	NA	NA	NA	NA	NA
NA	SYPL2	NA	NA	NA	NA	NA	NA	NA	NA	NA	NA	NA	NA	NA
NA	SYT16	NA	NA	NA	NA	NA	NA	NA	NA	NA	NA	NA	NA	NA
NA	SYT17	NA	NA	NA	NA	NA	NA	NA	NA	NA	NA	NA	NA	NA
NA	SYTL3	NA	NA	NA	NA	NA	NA	NA	NA	NA	NA	NA	NA	NA
NA	SYTL5	NA	NA	NA	NA	NA	NA	NA	NA	NA	NA	NA	NA	NA
NA	TAB3	NA	NA	NA	NA	NA	NA	NA	NA	NA	NA	NA	NA	NA
NA	TACC1	NA	NA	NA	NA	NA	NA	NA	NA	NA	NA	NA	NA	NA
NA	TAF13	NA	NA	NA	NA	NA	NA	NA	NA	NA	NA	NA	NA	NA
NA	TAGLN	NA	NA	NA	NA	NA	NA	NA	NA	NA	NA	NA	NA	NA
NA	TAL2	NA	NA	NA	NA	NA	NA	NA	NA	NA	NA	NA	NA	NA
NA	TANC1	NA	NA	NA	NA	NA	NA	NA	NA	NA	NA	NA	NA	NA
NA	TAOK2	NA	NA	NA	NA	NA	NA	NA	NA	NA	NA	NA	NA	NA
NA	TAPBP	NA	NA	NA	NA	NA	NA	NA	NA	NA	NA	NA	NA	NA
NA	TAPT1	NA	NA	NA	NA	NA	NA	NA	NA	NA	NA	NA	NA	NA
NA	TARSL2	NA	NA	NA	NA	NA	NA	NA	NA	NA	NA	NA	NA	NA
NA	TBC1D17	NA	NA	NA	NA	NA	NA	NA	NA	NA	NA	NA	NA	NA
NA	TBC1D19	NA	NA	NA	NA	NA	NA	NA	NA	NA	NA	NA	NA	NA
NA	TBC1D2	NA	NA	NA	NA	NA	NA	NA	NA	NA	NA	NA	NA	NA
NA	TBC1D2B	NA	NA	NA	NA	NA	NA	NA	NA	NA	NA	NA	NA	NA
NA	TBC1D4	NA	NA	NA	NA	NA	NA	NA	NA	NA	NA	NA	NA	NA
NA	TBC1D8B	NA	NA	NA	NA	NA	NA	NA	NA	NA	NA	NA	NA	NA
NA	TBCEL	NA	NA	NA	NA	NA	NA	NA	NA	NA	NA	NA	NA	NA
NA	TCEAL4	NA	NA	NA	NA	NA	NA	NA	NA	NA	NA	NA	NA	NA
NA	TCF23	NA	NA	NA	NA	NA	NA	NA	NA	NA	NA	NA	NA	NA
NA	TCP11L1	NA	NA	NA	NA	NA	NA	NA	NA	NA	NA	NA	NA	NA
NA	TCTA	NA	NA	NA	NA	NA	NA	NA	NA	NA	NA	NA	NA	NA
NA	TDRKH	NA	NA	NA	NA	NA	NA	NA	NA	NA	NA	NA	NA	NA
NA	TERF2IP	NA	NA	NA	NA	NA	NA	NA	NA	NA	NA	NA	NA	NA
NA	TEX2	NA	NA	NA	NA	NA	NA	NA	NA	NA	NA	NA	NA	NA
NA	TEX264	NA	NA	NA	NA	NA	NA	NA	NA	NA	NA	NA	NA	NA
NA	TFAP2A	NA	NA	NA	NA	NA	NA	NA	NA	NA	NA	NA	NA	NA
NA	TFEB	NA	NA	NA	NA	NA	NA	NA	NA	NA	NA	NA	NA	NA
NA	TG	NA	NA	NA	NA	NA	NA	NA	NA	NA	NA	NA	NA	NA
NA	TGFB2	NA	NA	NA	NA	NA	NA	NA	NA	NA	NA	NA	NA	NA
NA	TGFBR2	NA	NA	NA	NA	NA	NA	NA	NA	NA	NA	NA	NA	NA
NA	TGM2	NA	NA	NA	NA	NA	NA	NA	NA	NA	NA	NA	NA	NA
NA	THAP8	NA	NA	NA	NA	NA	NA	NA	NA	NA	NA	NA	NA	NA
NA	THBS2	NA	NA	NA	NA	NA	NA	NA	NA	NA	NA	NA	NA	NA
NA	THEMIS	NA	NA	NA	NA	NA	NA	NA	NA	NA	NA	NA	NA	NA
NA	THY1	NA	NA	NA	NA	NA	NA	NA	NA	NA	NA	NA	NA	NA
NA	TIAM1	NA	NA	NA	NA	NA	NA	NA	NA	NA	NA	NA	NA	NA
NA	TIMP2	NA	NA	NA	NA	NA	NA	NA	NA	NA	NA	NA	NA	NA
NA	TIMP3	NA	NA	NA	NA	NA	NA	NA	NA	NA	NA	NA	NA	NA
NA	TK2	NA	NA	NA	NA	NA	NA	NA	NA	NA	NA	NA	NA	NA
NA	TLL2	NA	NA	NA	NA	NA	NA	NA	NA	NA	NA	NA	NA	NA
NA	TLR4	NA	NA	NA	NA	NA	NA	NA	NA	NA	NA	NA	NA	NA
NA	TM2D1	NA	NA	NA	NA	NA	NA	NA	NA	NA	NA	NA	NA	NA
NA	TM2D2	NA	NA	NA	NA	NA	NA	NA	NA	NA	NA	NA	NA	NA
NA	TM6SF2	NA	NA	NA	NA	NA	NA	NA	NA	NA	NA	NA	NA	NA
NA	TM7SF3	NA	NA	NA	NA	NA	NA	NA	NA	NA	NA	NA	NA	NA
NA	TMBIM1	NA	NA	NA	NA	NA	NA	NA	NA	NA	NA	NA	NA	NA
NA	TMC6	NA	NA	NA	NA	NA	NA	NA	NA	NA	NA	NA	NA	NA
NA	TMCC1	NA	NA	NA	NA	NA	NA	NA	NA	NA	NA	NA	NA	NA
NA	TMCO1	NA	NA	NA	NA	NA	NA	NA	NA	NA	NA	NA	NA	NA
NA	TMED3	NA	NA	NA	NA	NA	NA	NA	NA	NA	NA	NA	NA	NA
NA	TMED4	NA	NA	NA	NA	NA	NA	NA	NA	NA	NA	NA	NA	NA
NA	TMEM102	NA	NA	NA	NA	NA	NA	NA	NA	NA	NA	NA	NA	NA
NA	TMEM106A	NA	NA	NA	NA	NA	NA	NA	NA	NA	NA	NA	NA	NA
NA	TMEM108	NA	NA	NA	NA	NA	NA	NA	NA	NA	NA	NA	NA	NA
NA	TMEM117	NA	NA	NA	NA	NA	NA	NA	NA	NA	NA	NA	NA	NA
NA	TMEM120A	NA	NA	NA	NA	NA	NA	NA	NA	NA	NA	NA	NA	NA
NA	TMEM127	NA	NA	NA	NA	NA	NA	NA	NA	NA	NA	NA	NA	NA
NA	TMEM129	NA	NA	NA	NA	NA	NA	NA	NA	NA	NA	NA	NA	NA
NA	TMEM131	NA	NA	NA	NA	NA	NA	NA	NA	NA	NA	NA	NA	NA
NA	TMEM134	NA	NA	NA	NA	NA	NA	NA	NA	NA	NA	NA	NA	NA
NA	TMEM136	NA	NA	NA	NA	NA	NA	NA	NA	NA	NA	NA	NA	NA
NA	TMEM150A	NA	NA	NA	NA	NA	NA	NA	NA	NA	NA	NA	NA	NA
NA	TMEM154	NA	NA	NA	NA	NA	NA	NA	NA	NA	NA	NA	NA	NA
NA	TMEM156	NA	NA	NA	NA	NA	NA	NA	NA	NA	NA	NA	NA	NA
NA	TMEM159	NA	NA	NA	NA	NA	NA	NA	NA	NA	NA	NA	NA	NA
NA	TMEM165	NA	NA	NA	NA	NA	NA	NA	NA	NA	NA	NA	NA	NA
NA	TMEM173	NA	NA	NA	NA	NA	NA	NA	NA	NA	NA	NA	NA	NA
NA	TMEM175	NA	NA	NA	NA	NA	NA	NA	NA	NA	NA	NA	NA	NA
NA	TMEM179B	NA	NA	NA	NA	NA	NA	NA	NA	NA	NA	NA	NA	NA
NA	TMEM181	NA	NA	NA	NA	NA	NA	NA	NA	NA	NA	NA	NA	NA
NA	TMEM187	NA	NA	NA	NA	NA	NA	NA	NA	NA	NA	NA	NA	NA
NA	TMEM200A	NA	NA	NA	NA	NA	NA	NA	NA	NA	NA	NA	NA	NA
NA	TMEM217	NA	NA	NA	NA	NA	NA	NA	NA	NA	NA	NA	NA	NA
NA	TMEM219	NA	NA	NA	NA	NA	NA	NA	NA	NA	NA	NA	NA	NA
NA	TMEM232	NA	NA	NA	NA	NA	NA	NA	NA	NA	NA	NA	NA	NA
NA	TMEM30A	NA	NA	NA	NA	NA	NA	NA	NA	NA	NA	NA	NA	NA
NA	TMEM41B	NA	NA	NA	NA	NA	NA	NA	NA	NA	NA	NA	NA	NA
NA	TMEM50A	NA	NA	NA	NA	NA	NA	NA	NA	NA	NA	NA	NA	NA
NA	TMEM59	NA	NA	NA	NA	NA	NA	NA	NA	NA	NA	NA	NA	NA
NA	TMEM63A	NA	NA	NA	NA	NA	NA	NA	NA	NA	NA	NA	NA	NA
NA	TMEM63B	NA	NA	NA	NA	NA	NA	NA	NA	NA	NA	NA	NA	NA
NA	TMEM86A	NA	NA	NA	NA	NA	NA	NA	NA	NA	NA	NA	NA	NA
NA	TMEM8A	NA	NA	NA	NA	NA	NA	NA	NA	NA	NA	NA	NA	NA
NA	TMEM95	NA	NA	NA	NA	NA	NA	NA	NA	NA	NA	NA	NA	NA
NA	TMEM9B	NA	NA	NA	NA	NA	NA	NA	NA	NA	NA	NA	NA	NA
NA	TMOD2	NA	NA	NA	NA	NA	NA	NA	NA	NA	NA	NA	NA	NA
NA	TMOD3	NA	NA	NA	NA	NA	NA	NA	NA	NA	NA	NA	NA	NA
NA	TNFAIP1	NA	NA	NA	NA	NA	NA	NA	NA	NA	NA	NA	NA	NA
NA	TNFAIP8L3	NA	NA	NA	NA	NA	NA	NA	NA	NA	NA	NA	NA	NA
NA	TNFRSF10A	NA	NA	NA	NA	NA	NA	NA	NA	NA	NA	NA	NA	NA
NA	TNFRSF10B	NA	NA	NA	NA	NA	NA	NA	NA	NA	NA	NA	NA	NA
NA	TNFRSF10D	NA	NA	NA	NA	NA	NA	NA	NA	NA	NA	NA	NA	NA
NA	TNFRSF13B	NA	NA	NA	NA	NA	NA	NA	NA	NA	NA	NA	NA	NA
NA	TNFRSF21	NA	NA	NA	NA	NA	NA	NA	NA	NA	NA	NA	NA	NA
NA	TNFSF10	NA	NA	NA	NA	NA	NA	NA	NA	NA	NA	NA	NA	NA
NA	TNFSF15	NA	NA	NA	NA	NA	NA	NA	NA	NA	NA	NA	NA	NA
NA	TNFSF18	NA	NA	NA	NA	NA	NA	NA	NA	NA	NA	NA	NA	NA
NA	TNFSF4	NA	NA	NA	NA	NA	NA	NA	NA	NA	NA	NA	NA	NA
NA	TNFSF9	NA	NA	NA	NA	NA	NA	NA	NA	NA	NA	NA	NA	NA
NA	TNIP1	NA	NA	NA	NA	NA	NA	NA	NA	NA	NA	NA	NA	NA
NA	TNNT2	NA	NA	NA	NA	NA	NA	NA	NA	NA	NA	NA	NA	NA
NA	TNP2	NA	NA	NA	NA	NA	NA	NA	NA	NA	NA	NA	NA	NA
NA	TNS1	NA	NA	NA	NA	NA	NA	NA	NA	NA	NA	NA	NA	NA
NA	TOB1	NA	NA	NA	NA	NA	NA	NA	NA	NA	NA	NA	NA	NA
NA	TOM1	NA	NA	NA	NA	NA	NA	NA	NA	NA	NA	NA	NA	NA
NA	TOM1L2	NA	NA	NA	NA	NA	NA	NA	NA	NA	NA	NA	NA	NA
NA	TOR1AIP2	NA	NA	NA	NA	NA	NA	NA	NA	NA	NA	NA	NA	NA
NA	TOR1B	NA	NA	NA	NA	NA	NA	NA	NA	NA	NA	NA	NA	NA
NA	TP53INP1	NA	NA	NA	NA	NA	NA	NA	NA	NA	NA	NA	NA	NA
NA	TP53INP2	NA	NA	NA	NA	NA	NA	NA	NA	NA	NA	NA	NA	NA
NA	TPBG	NA	NA	NA	NA	NA	NA	NA	NA	NA	NA	NA	NA	NA
NA	TPCN1	NA	NA	NA	NA	NA	NA	NA	NA	NA	NA	NA	NA	NA
NA	TPD52L1	NA	NA	NA	NA	NA	NA	NA	NA	NA	NA	NA	NA	NA
NA	TPD52L2	NA	NA	NA	NA	NA	NA	NA	NA	NA	NA	NA	NA	NA
NA	TPM1	NA	NA	NA	NA	NA	NA	NA	NA	NA	NA	NA	NA	NA
NA	TPRG1L	NA	NA	NA	NA	NA	NA	NA	NA	NA	NA	NA	NA	NA
NA	TRAF6	NA	NA	NA	NA	NA	NA	NA	NA	NA	NA	NA	NA	NA
NA	TRAK1	NA	NA	NA	NA	NA	NA	NA	NA	NA	NA	NA	NA	NA
NA	TRAK2	NA	NA	NA	NA	NA	NA	NA	NA	NA	NA	NA	NA	NA
NA	TRAM1	NA	NA	NA	NA	NA	NA	NA	NA	NA	NA	NA	NA	NA
NA	TREM1	NA	NA	NA	NA	NA	NA	NA	NA	NA	NA	NA	NA	NA
NA	TRIB2	NA	NA	NA	NA	NA	NA	NA	NA	NA	NA	NA	NA	NA
NA	TRIM22	NA	NA	NA	NA	NA	NA	NA	NA	NA	NA	NA	NA	NA
NA	TRIM32	NA	NA	NA	NA	NA	NA	NA	NA	NA	NA	NA	NA	NA
NA	TRIML2	NA	NA	NA	NA	NA	NA	NA	NA	NA	NA	NA	NA	NA
NA	TRPC1	NA	NA	NA	NA	NA	NA	NA	NA	NA	NA	NA	NA	NA
NA	TRPC4	NA	NA	NA	NA	NA	NA	NA	NA	NA	NA	NA	NA	NA
NA	TRPM4	NA	NA	NA	NA	NA	NA	NA	NA	NA	NA	NA	NA	NA
NA	TRPS1	NA	NA	NA	NA	NA	NA	NA	NA	NA	NA	NA	NA	NA
NA	TRPV2	NA	NA	NA	NA	NA	NA	NA	NA	NA	NA	NA	NA	NA
NA	TSC22D1	NA	NA	NA	NA	NA	NA	NA	NA	NA	NA	NA	NA	NA
NA	TSC22D3	NA	NA	NA	NA	NA	NA	NA	NA	NA	NA	NA	NA	NA
NA	TSEN34	NA	NA	NA	NA	NA	NA	NA	NA	NA	NA	NA	NA	NA
NA	TSGA10	NA	NA	NA	NA	NA	NA	NA	NA	NA	NA	NA	NA	NA
NA	TSPAN11	NA	NA	NA	NA	NA	NA	NA	NA	NA	NA	NA	NA	NA
NA	TSPAN13	NA	NA	NA	NA	NA	NA	NA	NA	NA	NA	NA	NA	NA
NA	TSPAN14	NA	NA	NA	NA	NA	NA	NA	NA	NA	NA	NA	NA	NA
NA	TSPAN4	NA	NA	NA	NA	NA	NA	NA	NA	NA	NA	NA	NA	NA
NA	TSPAN9	NA	NA	NA	NA	NA	NA	NA	NA	NA	NA	NA	NA	NA
NA	TSPYL1	NA	NA	NA	NA	NA	NA	NA	NA	NA	NA	NA	NA	NA
NA	TSPYL2	NA	NA	NA	NA	NA	NA	NA	NA	NA	NA	NA	NA	NA
NA	TSTA3	NA	NA	NA	NA	NA	NA	NA	NA	NA	NA	NA	NA	NA
NA	TTC13	NA	NA	NA	NA	NA	NA	NA	NA	NA	NA	NA	NA	NA
NA	TTC23L	NA	NA	NA	NA	NA	NA	NA	NA	NA	NA	NA	NA	NA
NA	TTC3	NA	NA	NA	NA	NA	NA	NA	NA	NA	NA	NA	NA	NA
NA	TTC36	NA	NA	NA	NA	NA	NA	NA	NA	NA	NA	NA	NA	NA
NA	TTC9	NA	NA	NA	NA	NA	NA	NA	NA	NA	NA	NA	NA	NA
NA	TUBA4A	NA	NA	NA	NA	NA	NA	NA	NA	NA	NA	NA	NA	NA
NA	TUBB2A	NA	NA	NA	NA	NA	NA	NA	NA	NA	NA	NA	NA	NA
NA	TUBG2	NA	NA	NA	NA	NA	NA	NA	NA	NA	NA	NA	NA	NA
NA	TUFT1	NA	NA	NA	NA	NA	NA	NA	NA	NA	NA	NA	NA	NA
NA	TUSC3	NA	NA	NA	NA	NA	NA	NA	NA	NA	NA	NA	NA	NA
NA	TXNDC11	NA	NA	NA	NA	NA	NA	NA	NA	NA	NA	NA	NA	NA
NA	TXNDC17	NA	NA	NA	NA	NA	NA	NA	NA	NA	NA	NA	NA	NA
NA	TYRP1	NA	NA	NA	NA	NA	NA	NA	NA	NA	NA	NA	NA	NA
NA	UACA	NA	NA	NA	NA	NA	NA	NA	NA	NA	NA	NA	NA	NA
NA	UBASH3B	NA	NA	NA	NA	NA	NA	NA	NA	NA	NA	NA	NA	NA
NA	UBE2B	NA	NA	NA	NA	NA	NA	NA	NA	NA	NA	NA	NA	NA
NA	UBE2E2	NA	NA	NA	NA	NA	NA	NA	NA	NA	NA	NA	NA	NA
NA	UBE2H	NA	NA	NA	NA	NA	NA	NA	NA	NA	NA	NA	NA	NA
NA	UBE2W	NA	NA	NA	NA	NA	NA	NA	NA	NA	NA	NA	NA	NA
NA	UBL3	NA	NA	NA	NA	NA	NA	NA	NA	NA	NA	NA	NA	NA
NA	UBTD1	NA	NA	NA	NA	NA	NA	NA	NA	NA	NA	NA	NA	NA
NA	UCHL1	NA	NA	NA	NA	NA	NA	NA	NA	NA	NA	NA	NA	NA
NA	UFM1	NA	NA	NA	NA	NA	NA	NA	NA	NA	NA	NA	NA	NA
NA	ULBP1	NA	NA	NA	NA	NA	NA	NA	NA	NA	NA	NA	NA	NA
NA	ULBP2	NA	NA	NA	NA	NA	NA	NA	NA	NA	NA	NA	NA	NA
NA	UNC119	NA	NA	NA	NA	NA	NA	NA	NA	NA	NA	NA	NA	NA
NA	UNC13A	NA	NA	NA	NA	NA	NA	NA	NA	NA	NA	NA	NA	NA
NA	UNC13B	NA	NA	NA	NA	NA	NA	NA	NA	NA	NA	NA	NA	NA
NA	UNC93B1	NA	NA	NA	NA	NA	NA	NA	NA	NA	NA	NA	NA	NA
NA	UQCR11	NA	NA	NA	NA	NA	NA	NA	NA	NA	NA	NA	NA	NA
NA	USP35	NA	NA	NA	NA	NA	NA	NA	NA	NA	NA	NA	NA	NA
NA	USP53	NA	NA	NA	NA	NA	NA	NA	NA	NA	NA	NA	NA	NA
NA	USP6	NA	NA	NA	NA	NA	NA	NA	NA	NA	NA	NA	NA	NA
NA	UST	NA	NA	NA	NA	NA	NA	NA	NA	NA	NA	NA	NA	NA
NA	UTS2R	NA	NA	NA	NA	NA	NA	NA	NA	NA	NA	NA	NA	NA
NA	VAMP2	NA	NA	NA	NA	NA	NA	NA	NA	NA	NA	NA	NA	NA
NA	VAMP3	NA	NA	NA	NA	NA	NA	NA	NA	NA	NA	NA	NA	NA
NA	VAT1	NA	NA	NA	NA	NA	NA	NA	NA	NA	NA	NA	NA	NA
NA	VCPIP1	NA	NA	NA	NA	NA	NA	NA	NA	NA	NA	NA	NA	NA
NA	VDAC2	NA	NA	NA	NA	NA	NA	NA	NA	NA	NA	NA	NA	NA
NA	VGLL3	NA	NA	NA	NA	NA	NA	NA	NA	NA	NA	NA	NA	NA
NA	VKORC1	NA	NA	NA	NA	NA	NA	NA	NA	NA	NA	NA	NA	NA
NA	VLDLR	NA	NA	NA	NA	NA	NA	NA	NA	NA	NA	NA	NA	NA
NA	VN1R1	NA	NA	NA	NA	NA	NA	NA	NA	NA	NA	NA	NA	NA
NA	VNN1	NA	NA	NA	NA	NA	NA	NA	NA	NA	NA	NA	NA	NA
NA	VWCE	NA	NA	NA	NA	NA	NA	NA	NA	NA	NA	NA	NA	NA
NA	WDR26	NA	NA	NA	NA	NA	NA	NA	NA	NA	NA	NA	NA	NA
NA	WDR41	NA	NA	NA	NA	NA	NA	NA	NA	NA	NA	NA	NA	NA
NA	WDR44	NA	NA	NA	NA	NA	NA	NA	NA	NA	NA	NA	NA	NA
NA	WDR45	NA	NA	NA	NA	NA	NA	NA	NA	NA	NA	NA	NA	NA
NA	WDR60	NA	NA	NA	NA	NA	NA	NA	NA	NA	NA	NA	NA	NA
NA	WDR63	NA	NA	NA	NA	NA	NA	NA	NA	NA	NA	NA	NA	NA
NA	WDR66	NA	NA	NA	NA	NA	NA	NA	NA	NA	NA	NA	NA	NA
NA	WDR78	NA	NA	NA	NA	NA	NA	NA	NA	NA	NA	NA	NA	NA
NA	WIPI1	NA	NA	NA	NA	NA	NA	NA	NA	NA	NA	NA	NA	NA
NA	WIPI2	NA	NA	NA	NA	NA	NA	NA	NA	NA	NA	NA	NA	NA
NA	WLS	NA	NA	NA	NA	NA	NA	NA	NA	NA	NA	NA	NA	NA
NA	WNK1	NA	NA	NA	NA	NA	NA	NA	NA	NA	NA	NA	NA	NA
NA	WNT16	NA	NA	NA	NA	NA	NA	NA	NA	NA	NA	NA	NA	NA
NA	WNT5A	NA	NA	NA	NA	NA	NA	NA	NA	NA	NA	NA	NA	NA
NA	WNT5B	NA	NA	NA	NA	NA	NA	NA	NA	NA	NA	NA	NA	NA
NA	WNT9B	NA	NA	NA	NA	NA	NA	NA	NA	NA	NA	NA	NA	NA
NA	WRB	NA	NA	NA	NA	NA	NA	NA	NA	NA	NA	NA	NA	NA
NA	WSB1	NA	NA	NA	NA	NA	NA	NA	NA	NA	NA	NA	NA	NA
NA	XDH	NA	NA	NA	NA	NA	NA	NA	NA	NA	NA	NA	NA	NA
NA	XRCC4	NA	NA	NA	NA	NA	NA	NA	NA	NA	NA	NA	NA	NA
NA	XYLT1	NA	NA	NA	NA	NA	NA	NA	NA	NA	NA	NA	NA	NA
NA	XYLT2	NA	NA	NA	NA	NA	NA	NA	NA	NA	NA	NA	NA	NA
NA	YIF1B	NA	NA	NA	NA	NA	NA	NA	NA	NA	NA	NA	NA	NA
NA	YIPF5	NA	NA	NA	NA	NA	NA	NA	NA	NA	NA	NA	NA	NA
NA	YPEL2	NA	NA	NA	NA	NA	NA	NA	NA	NA	NA	NA	NA	NA
NA	YPEL3	NA	NA	NA	NA	NA	NA	NA	NA	NA	NA	NA	NA	NA
NA	YPEL5	NA	NA	NA	NA	NA	NA	NA	NA	NA	NA	NA	NA	NA
NA	ZBTB4	NA	NA	NA	NA	NA	NA	NA	NA	NA	NA	NA	NA	NA
NA	ZBTB46	NA	NA	NA	NA	NA	NA	NA	NA	NA	NA	NA	NA	NA
NA	ZBTB47	NA	NA	NA	NA	NA	NA	NA	NA	NA	NA	NA	NA	NA
NA	ZBTB7B	NA	NA	NA	NA	NA	NA	NA	NA	NA	NA	NA	NA	NA
NA	ZC3H12B	NA	NA	NA	NA	NA	NA	NA	NA	NA	NA	NA	NA	NA
NA	ZDBF2	NA	NA	NA	NA	NA	NA	NA	NA	NA	NA	NA	NA	NA
NA	ZDHHC1	NA	NA	NA	NA	NA	NA	NA	NA	NA	NA	NA	NA	NA
NA	ZDHHC14	NA	NA	NA	NA	NA	NA	NA	NA	NA	NA	NA	NA	NA
NA	ZDHHC23	NA	NA	NA	NA	NA	NA	NA	NA	NA	NA	NA	NA	NA
NA	ZDHHC24	NA	NA	NA	NA	NA	NA	NA	NA	NA	NA	NA	NA	NA
NA	ZDHHC9	NA	NA	NA	NA	NA	NA	NA	NA	NA	NA	NA	NA	NA
NA	ZER1	NA	NA	NA	NA	NA	NA	NA	NA	NA	NA	NA	NA	NA
NA	ZFAND2A	NA	NA	NA	NA	NA	NA	NA	NA	NA	NA	NA	NA	NA
NA	ZFAND3	NA	NA	NA	NA	NA	NA	NA	NA	NA	NA	NA	NA	NA
NA	ZFHX2	NA	NA	NA	NA	NA	NA	NA	NA	NA	NA	NA	NA	NA
NA	ZFHX3	NA	NA	NA	NA	NA	NA	NA	NA	NA	NA	NA	NA	NA
NA	ZFP28	NA	NA	NA	NA	NA	NA	NA	NA	NA	NA	NA	NA	NA
NA	ZG16B	NA	NA	NA	NA	NA	NA	NA	NA	NA	NA	NA	NA	NA
NA	ZHX3	NA	NA	NA	NA	NA	NA	NA	NA	NA	NA	NA	NA	NA
NA	ZMAT3	NA	NA	NA	NA	NA	NA	NA	NA	NA	NA	NA	NA	NA
NA	ZNF175	NA	NA	NA	NA	NA	NA	NA	NA	NA	NA	NA	NA	NA
NA	ZNF219	NA	NA	NA	NA	NA	NA	NA	NA	NA	NA	NA	NA	NA
NA	ZNF264	NA	NA	NA	NA	NA	NA	NA	NA	NA	NA	NA	NA	NA
NA	ZNF391	NA	NA	NA	NA	NA	NA	NA	NA	NA	NA	NA	NA	NA
NA	ZNF425	NA	NA	NA	NA	NA	NA	NA	NA	NA	NA	NA	NA	NA
NA	ZNF432	NA	NA	NA	NA	NA	NA	NA	NA	NA	NA	NA	NA	NA
NA	ZNF517	NA	NA	NA	NA	NA	NA	NA	NA	NA	NA	NA	NA	NA
NA	ZNF528	NA	NA	NA	NA	NA	NA	NA	NA	NA	NA	NA	NA	NA
NA	ZNF582	NA	NA	NA	NA	NA	NA	NA	NA	NA	NA	NA	NA	NA
NA	ZNF583	NA	NA	NA	NA	NA	NA	NA	NA	NA	NA	NA	NA	NA
NA	ZNF610	NA	NA	NA	NA	NA	NA	NA	NA	NA	NA	NA	NA	NA
NA	ZNF622	NA	NA	NA	NA	NA	NA	NA	NA	NA	NA	NA	NA	NA
NA	ZNF654	NA	NA	NA	NA	NA	NA	NA	NA	NA	NA	NA	NA	NA
NA	ZNF69	NA	NA	NA	NA	NA	NA	NA	NA	NA	NA	NA	NA	NA
NA	ZNF763	NA	NA	NA	NA	NA	NA	NA	NA	NA	NA	NA	NA	NA
NA	ZNFX1	NA	NA	NA	NA	NA	NA	NA	NA	NA	NA	NA	NA	NA
NA	ZP1	NA	NA	NA	NA	NA	NA	NA	NA	NA	NA	NA	NA	NA
NA	ZP2	NA	NA	NA	NA	NA	NA	NA	NA	NA	NA	NA	NA	NA
NA	ZPLD1	NA	NA	NA	NA	NA	NA	NA	NA	NA	NA	NA	NA	NA

## Sheet: GSE59861_12h_GSE55118
X1_sets_GSE55118_middle_vs_young	X1_sets_GSE55118_old_vs_young	X1_sets_GSE59861_12h_2Gy	X1_sets_GSE59861_12h_5cGy	X2_sets_GSE55118_middle_vs_young_GSE55118_old_vs_young	X2_sets_GSE55118_middle_vs_young_GSE59861_12h_2Gy	X2_sets_GSE55118_middle_vs_young_GSE59861_12h_5cGy	X2_sets_GSE55118_old_vs_young_GSE59861_12h_2Gy	X2_sets_GSE55118_old_vs_young_GSE59861_12h_5cGy	X2_sets_GSE59861_12h_2Gy_GSE59861_12h_5cGy	X3_sets_GSE55118_middle_vs_young_GSE55118_old_vs_young_GSE59861_12h_2Gy	X3_sets_GSE55118_middle_vs_young_GSE55118_old_vs_young_GSE59861_12h_5cGy	X3_sets_GSE55118_middle_vs_young_GSE59861_12h_2Gy_GSE59861_12h_5cGy	X3_sets_GSE55118_old_vs_young_GSE59861_12h_2Gy_GSE59861_12h_5cGy	X4_sets_GSE55118_middle_vs_young_GSE55118_old_vs_young_GSE59861_12h_2Gy_GSE59861_12h_5cGy
ABCB10	ABCG5	ABCA1	AANAT	ABHD13	SERAC1	C9ORF40	DLL1	KIAA1958	ABCA1	NA	MTMR14	NA	TRAF1	NA
ABCE1	ABHD13	ABHD6	ABCA1	ANKRD33	NA	MTMR14	TRAF1	MTMR14	AKAP1	NA	NA	NA	NA	NA
ABHD13	ABHD3	AKAP1	AKAP1	ANP32C	NA	NA	NA	TRAF1	AKNA	NA	NA	NA	NA	NA
ABHD5	ACBD5	AKNA	AKNA	APIP	NA	NA	NA	NA	ANGPTL2	NA	NA	NA	NA	NA
ACADM	ACOT12	ANGPTL2	ANGPTL2	AQP8	NA	NA	NA	NA	ANK1	NA	NA	NA	NA	NA
ACER2	ACTN3	ANK1	ANK1	ATP2B3	NA	NA	NA	NA	APCDD1	NA	NA	NA	NA	NA
ACTR3C	ACTR3	ANKRD34A	APCDD1	C8ORF58	NA	NA	NA	NA	APOL6	NA	NA	NA	NA	NA
ACTRT2	ADAM9	APCDD1	APOL6	CD300A	NA	NA	NA	NA	ARHGEF2	NA	NA	NA	NA	NA
AGXT	AFMID	APH1A	ARHGEF2	CHST4	NA	NA	NA	NA	ARMC9	NA	NA	NA	NA	NA
AIF1L	ALAS2	APH1B	ARMC9	CLDN16	NA	NA	NA	NA	ARPC3	NA	NA	NA	NA	NA
AJAP1	ALDOB	APOL6	ARPC3	CRYGD	NA	NA	NA	NA	ATG14	NA	NA	NA	NA	NA
ALOX15B	AMN1	ARFIP2	ATG14	DBF4B	NA	NA	NA	NA	ATXN7L1	NA	NA	NA	NA	NA
ALS2CL	ANKRD12	ARHGEF2	ATXN7L1	EFNA1	NA	NA	NA	NA	BBC3	NA	NA	NA	NA	NA
AMPD3	ANKRD33	ARHGEF3	BBC3	FAM81A	NA	NA	NA	NA	BCDIN3D	NA	NA	NA	NA	NA
ANKRD33	ANP32C	ARMC9	BCDIN3D	FAM83E	NA	NA	NA	NA	C12ORF65	NA	NA	NA	NA	NA
ANO10	APIP	ARPC3	BCL11A	FOLR2	NA	NA	NA	NA	C1ORF109	NA	NA	NA	NA	NA
ANP32C	AQP8	ATF4	BCL2L11	GABRA3	NA	NA	NA	NA	CASKIN2	NA	NA	NA	NA	NA
AP1M2	ARGLU1	ATG14	BCORL1	GBGT1	NA	NA	NA	NA	CEP68	NA	NA	NA	NA	NA
APIP	ART3	ATXN7L1	BDH1	GNG8	NA	NA	NA	NA	CHAC1	NA	NA	NA	NA	NA
AQP8	ATF3	B3GALT4	BDKRB2	H1FOO	NA	NA	NA	NA	COQ10A	NA	NA	NA	NA	NA
ARHGAP33	ATMIN	BBC3	BMP2K	HCRTR1	NA	NA	NA	NA	CTNS	NA	NA	NA	NA	NA
ARL6IP6	ATP2B3	BCDIN3D	C12ORF65	HERC3	NA	NA	NA	NA	DAB2IP	NA	NA	NA	NA	NA
ASTL	ATXN10	BCL2L1	C1ORF109	IL18BP	NA	NA	NA	NA	DCLK1	NA	NA	NA	NA	NA
ATP2B3	AZI2	BCL6	C2ORF68	JAK3	NA	NA	NA	NA	DCP1B	NA	NA	NA	NA	NA
ATP8B3	BLNK	BTG2	C9ORF40	KIAA0040	NA	NA	NA	NA	DDIT3	NA	NA	NA	NA	NA
ATXN1	BPNT1	C12ORF65	CACNA2D3	KRTAP3-1	NA	NA	NA	NA	DDIT4	NA	NA	NA	NA	NA
BBS7	BRSK2	C1ORF109	CASKIN2	LCE3C	NA	NA	NA	NA	DOCK3	NA	NA	NA	NA	NA
BCOR	BRWD1	CACNA1C	CCNG2	LCNL1	NA	NA	NA	NA	EGR2	NA	NA	NA	NA	NA
BHLHE23	C1ORF127	CAMK2G	CDKN1C	LONRF3	NA	NA	NA	NA	EVC2	NA	NA	NA	NA	NA
C10ORF120	C1ORF194	CASKIN2	CELF2	LRRC27	NA	NA	NA	NA	FAM117A	NA	NA	NA	NA	NA
C16ORF71	C1QTNF6	CCDC130	CENPP	MFNG	NA	NA	NA	NA	GDF15	NA	NA	NA	NA	NA
C1ORF189	C7	CCNG1	CEP68	MTMR14	NA	NA	NA	NA	GDF5	NA	NA	NA	NA	NA
C8ORF58	C8ORF58	CDKAL1	CHAC1	MUSK	NA	NA	NA	NA	GNPDA1	NA	NA	NA	NA	NA
C9ORF40	CACNA1I	CDKN1A	CKAP2	MYEOV	NA	NA	NA	NA	GRASP	NA	NA	NA	NA	NA
CALML4	CAMSAP1	CEP68	CLDN23	OR7C2	NA	NA	NA	NA	HPS4	NA	NA	NA	NA	NA
CANX	CCDC34	CHAC1	CLK2	OTUD6A	NA	NA	NA	NA	IFFO1	NA	NA	NA	NA	NA
CAPZA2	CCL18	COPS6	CLN8	PACRGL	NA	NA	NA	NA	INHBE	NA	NA	NA	NA	NA
CAV3	CCL7	COQ10A	CNP	PAX7	NA	NA	NA	NA	JRK	NA	NA	NA	NA	NA
CCDC58	CCR1	CPSF4	COQ10A	PKLR	NA	NA	NA	NA	KCNE4	NA	NA	NA	NA	NA
CCDC82	CD300A	CREBZF	CORO2A	PPP6R2	NA	NA	NA	NA	KCNN2	NA	NA	NA	NA	NA
CCT5	CD300E	CTHRC1	CPEB1	PRSS22	NA	NA	NA	NA	KCTD7	NA	NA	NA	NA	NA
CD163	CDH13	CTNS	CPEB3	PTPN6	NA	NA	NA	NA	KIAA0513	NA	NA	NA	NA	NA
CD300A	CGRRF1	DAB2IP	CRYM	RETN	NA	NA	NA	NA	KIAA1217	NA	NA	NA	NA	NA
CD8B	CHIT1	DCLK1	CTDSPL	SLC14A2	NA	NA	NA	NA	KLF4	NA	NA	NA	NA	NA
CDH3	CHST4	DCP1B	CTNS	SLC23A3	NA	NA	NA	NA	LIMK2	NA	NA	NA	NA	NA
CDK10	CISD1	DDB2	DAB2IP	SLC30A3	NA	NA	NA	NA	MAP3K12	NA	NA	NA	NA	NA
CDR1	CLDN16	DDIT3	DAPK1	SLC32A1	NA	NA	NA	NA	MAVS	NA	NA	NA	NA	NA
CHRNB3	CLDN6	DDIT4	DCLK1	SLC6A5	NA	NA	NA	NA	MTHFR	NA	NA	NA	NA	NA
CHST4	CLDND2	DHRS3	DCP1B	SNRPD2P2	NA	NA	NA	NA	NIPAL4	NA	NA	NA	NA	NA
CLCN1	CMPK2	DIDO1	DDIT3	ST8SIA3	NA	NA	NA	NA	OGT	NA	NA	NA	NA	NA
CLDN16	CNGB1	DLL1	DDIT4	TFAM	NA	NA	NA	NA	OLFML2B	NA	NA	NA	NA	NA
CLDN3	COL11A2	DNAJC27	DNAJC18	TTLL9	NA	NA	NA	NA	ORAI3	NA	NA	NA	NA	NA
COMMD6	COL19A1	DNAJC6	DOCK3	VPREB3	NA	NA	NA	NA	PEX11B	NA	NA	NA	NA	NA
CRYGD	COL4A4	DOCK3	EBF1	VWA2	NA	NA	NA	NA	PLXNB2	NA	NA	NA	NA	NA
CXCL5	COLEC11	DVL2	EGR2	WDFY4	NA	NA	NA	NA	POLG2	NA	NA	NA	NA	NA
DBF4B	COX6B2	EDA2R	EVC2	WDR38	NA	NA	NA	NA	PPFIBP2	NA	NA	NA	NA	NA
DCAF12L2	CPLX2	EGR2	FAM117A	WNT1	NA	NA	NA	NA	PPM1B	NA	NA	NA	NA	NA
DEFB129	CRYGD	ENO3	FANCF	WNT4	NA	NA	NA	NA	PPP1R10	NA	NA	NA	NA	NA
DEK	CSMD1	EVC2	FBXO39	ZC3H12D	NA	NA	NA	NA	PRKD2	NA	NA	NA	NA	NA
DNA2	CTSS	EXOSC10	FMNL1	ZIC4	NA	NA	NA	NA	PTGES	NA	NA	NA	NA	NA
DPRX	CYP19A1	FAM117A	FRAT1	ZNF560	NA	NA	NA	NA	RRAGC	NA	NA	NA	NA	NA
EFNA1	D2HGDH	FAM43A	FZR1	ZSCAN1	NA	NA	NA	NA	SENP8	NA	NA	NA	NA	NA
EIF2AK3	DBF4B	FAM53C	GDF15	NA	NA	NA	NA	NA	SESN2	NA	NA	NA	NA	NA
ERI2	DBI	FBXL19	GDF5	NA	NA	NA	NA	NA	SFRP2	NA	NA	NA	NA	NA
FAM120C	DDX27	FBXO22	GNPDA1	NA	NA	NA	NA	NA	SLC22A15	NA	NA	NA	NA	NA
FAM124A	DDX58	FDXR	GRASP	NA	NA	NA	NA	NA	SOX4	NA	NA	NA	NA	NA
FAM3C	DENND4C	GDF15	HDAC11	NA	NA	NA	NA	NA	STC2	NA	NA	NA	NA	NA
FAM81A	DISP2	GDF5	HPS4	NA	NA	NA	NA	NA	SVIL	NA	NA	NA	NA	NA
FAM83E	DLK1	GGA1	IFFO1	NA	NA	NA	NA	NA	TET3	NA	NA	NA	NA	NA
FCN3	DLL1	GGA2	INHBE	NA	NA	NA	NA	NA	TMEM177	NA	NA	NA	NA	NA
FER1L5	DNAH14	GIGYF2	IP6K1	NA	NA	NA	NA	NA	TNRC6C	NA	NA	NA	NA	NA
FEZ2	DNASE1L2	GNPDA1	IRF2	NA	NA	NA	NA	NA	TRAF1	NA	NA	NA	NA	NA
FGF1	DNM3	GPNMB	IRF2BP2	NA	NA	NA	NA	NA	TRIM4	NA	NA	NA	NA	NA
FGFR3	DTWD1	GRASP	ISL2	NA	NA	NA	NA	NA	TSC22D3	NA	NA	NA	NA	NA
FMN2	EBP	HDHD3	JRK	NA	NA	NA	NA	NA	VEGFA	NA	NA	NA	NA	NA
FOLR2	ECEL1	HDLBP	KALRN	NA	NA	NA	NA	NA	ZFYVE1	NA	NA	NA	NA	NA
FOXD1	EFCAB6	HEMK1	KCNE4	NA	NA	NA	NA	NA	ZNF232	NA	NA	NA	NA	NA
FRMD3	EFNA1	HKR1	KCNN2	NA	NA	NA	NA	NA	ZNF419	NA	NA	NA	NA	NA
GABRA3	ENHO	HPS4	KCTD7	NA	NA	NA	NA	NA	ZNF425	NA	NA	NA	NA	NA
GBGT1	EPPK1	IFFO1	KDM3B	NA	NA	NA	NA	NA	ZNF451	NA	NA	NA	NA	NA
GLB1L3	ESCO1	INHBE	KIAA0513	NA	NA	NA	NA	NA	ZNF552	NA	NA	NA	NA	NA
GNG8	ESRP1	IRF9	KIAA0586	NA	NA	NA	NA	NA	ZNF589	NA	NA	NA	NA	NA
GNL2	FAM184A	JRK	KIAA1217	NA	NA	NA	NA	NA	ZNF691	NA	NA	NA	NA	NA
GPR137C	FAM81A	KCNE4	KIAA1958	NA	NA	NA	NA	NA	ZNF773	NA	NA	NA	NA	NA
GPSM3	FAM83E	KCNN2	KIF26B	NA	NA	NA	NA	NA	NA	NA	NA	NA	NA	NA
H1FOO	FFAR2	KCTD7	KLF4	NA	NA	NA	NA	NA	NA	NA	NA	NA	NA	NA
H2AFV	FIBCD1	KDSR	LIMK2	NA	NA	NA	NA	NA	NA	NA	NA	NA	NA	NA
HAUS6	FKTN	KHNYN	LOC100133091	NA	NA	NA	NA	NA	NA	NA	NA	NA	NA	NA
HCRTR1	FOLR2	KIAA0513	LYSMD4	NA	NA	NA	NA	NA	NA	NA	NA	NA	NA	NA
HERC3	FRS3	KIAA1217	MAP3K12	NA	NA	NA	NA	NA	NA	NA	NA	NA	NA	NA
HES6	FTHL17	KLF4	MAVS	NA	NA	NA	NA	NA	NA	NA	NA	NA	NA	NA
HIP1R	FTMT	KRT17	METTL7A	NA	NA	NA	NA	NA	NA	NA	NA	NA	NA	NA
HMGB2	GABRA3	LIMK2	MKNK2	NA	NA	NA	NA	NA	NA	NA	NA	NA	NA	NA
HNF1B	GAL	LRRC14	MMAB	NA	NA	NA	NA	NA	NA	NA	NA	NA	NA	NA
HSPH1	GBGT1	MAMDC2	MRGPRF	NA	NA	NA	NA	NA	NA	NA	NA	NA	NA	NA
IL18BP	GCNT2	MAP3K12	MTHFR	NA	NA	NA	NA	NA	NA	NA	NA	NA	NA	NA
JAK3	GLDN	MAP4K4	MTMR14	NA	NA	NA	NA	NA	NA	NA	NA	NA	NA	NA
JARID2	GNG8	MAVS	NAGS	NA	NA	NA	NA	NA	NA	NA	NA	NA	NA	NA
KIAA0040	GPC3	MBP	NDE1	NA	NA	NA	NA	NA	NA	NA	NA	NA	NA	NA
KIAA0232	GPR15	MDM2	NDST2	NA	NA	NA	NA	NA	NA	NA	NA	NA	NA	NA
KIAA1324L	GPR17	MFAP3L	NFATC4	NA	NA	NA	NA	NA	NA	NA	NA	NA	NA	NA
KIF1C	GPR50	MMP11	NFIX	NA	NA	NA	NA	NA	NA	NA	NA	NA	NA	NA
KIF21A	GRHL2	MTHFR	NIPAL4	NA	NA	NA	NA	NA	NA	NA	NA	NA	NA	NA
KIF21B	GRIN2C	MXRA8	NIT1	NA	NA	NA	NA	NA	NA	NA	NA	NA	NA	NA
KLF16	GSG1	N4BP2L1	OGT	NA	NA	NA	NA	NA	NA	NA	NA	NA	NA	NA
KLF5	H1FOO	NFX1	OLFML2B	NA	NA	NA	NA	NA	NA	NA	NA	NA	NA	NA
KLK3	HCRTR1	NIPAL4	ORAI3	NA	NA	NA	NA	NA	NA	NA	NA	NA	NA	NA
KRT32	HERC3	NYNRIN	PACSIN2	NA	NA	NA	NA	NA	NA	NA	NA	NA	NA	NA
KRTAP10-10	HEXB	OGT	PALMD	NA	NA	NA	NA	NA	NA	NA	NA	NA	NA	NA
KRTAP10-9	HLA-DOA	OLFML2B	PAQR8	NA	NA	NA	NA	NA	NA	NA	NA	NA	NA	NA
KRTAP3-1	HLA-DPB2	ORAI3	PEX11B	NA	NA	NA	NA	NA	NA	NA	NA	NA	NA	NA
LCE3B	HLA-DQB1	OSBPL3	PHF21A	NA	NA	NA	NA	NA	NA	NA	NA	NA	NA	NA
LCE3C	HSPA6	OXA1L	PITPNM2	NA	NA	NA	NA	NA	NA	NA	NA	NA	NA	NA
LCE3D	HSPB7	PARD6G	PLXNB2	NA	NA	NA	NA	NA	NA	NA	NA	NA	NA	NA
LCK	IFI16	PELI3	POLG2	NA	NA	NA	NA	NA	NA	NA	NA	NA	NA	NA
LCNL1	IGFL3	PEX11B	PPFIBP2	NA	NA	NA	NA	NA	NA	NA	NA	NA	NA	NA
LENG8	IL18BP	PHLDA3	PPM1B	NA	NA	NA	NA	NA	NA	NA	NA	NA	NA	NA
LMNB1	INTS8	PLEKHO2	PPP1R10	NA	NA	NA	NA	NA	NA	NA	NA	NA	NA	NA
LMO1	ITIH1	PLXNB2	PRKD2	NA	NA	NA	NA	NA	NA	NA	NA	NA	NA	NA
LONRF3	JAK3	POLG2	PTGES	NA	NA	NA	NA	NA	NA	NA	NA	NA	NA	NA
LRRC27	JKAMP	POLH	PXK	NA	NA	NA	NA	NA	NA	NA	NA	NA	NA	NA
LRRC42	KCNV1	POU2F2	RCCD1	NA	NA	NA	NA	NA	NA	NA	NA	NA	NA	NA
LTA	KIAA0040	PPFIBP2	RERE	NA	NA	NA	NA	NA	NA	NA	NA	NA	NA	NA
LY86	KIAA1958	PPM1B	ROR2	NA	NA	NA	NA	NA	NA	NA	NA	NA	NA	NA
LYPLA1	KIR3DX1	PPM1D	RRAGC	NA	NA	NA	NA	NA	NA	NA	NA	NA	NA	NA
LYSMD3	KISS1	PPP1R10	RUNX2	NA	NA	NA	NA	NA	NA	NA	NA	NA	NA	NA
MAPK12	KLC2	PPP2R5D	SENP8	NA	NA	NA	NA	NA	NA	NA	NA	NA	NA	NA
MARK1	KLF15	PRKD2	SESN2	NA	NA	NA	NA	NA	NA	NA	NA	NA	NA	NA
MBOAT1	KRT31	PSEN1	SETBP1	NA	NA	NA	NA	NA	NA	NA	NA	NA	NA	NA
MDGA2	KRTAP3-1	PSTPIP2	SFRP2	NA	NA	NA	NA	NA	NA	NA	NA	NA	NA	NA
MERTK	KRTAP5-10	PTGES	SH3BP2	NA	NA	NA	NA	NA	NA	NA	NA	NA	NA	NA
MFNG	KRTAP5-2	RAD52	SLC22A15	NA	NA	NA	NA	NA	NA	NA	NA	NA	NA	NA
MFSD6	KRTAP5-5	RFX5	SMYD4	NA	NA	NA	NA	NA	NA	NA	NA	NA	NA	NA
MPRIP	KRTAP6-2	RRAGC	SOX4	NA	NA	NA	NA	NA	NA	NA	NA	NA	NA	NA
MRS2	LARP7	SCIN	SPSB2	NA	NA	NA	NA	NA	NA	NA	NA	NA	NA	NA
MTHFD2L	LCE1B	SENP8	SSH2	NA	NA	NA	NA	NA	NA	NA	NA	NA	NA	NA
MTMR14	LCE3C	SERAC1	STC2	NA	NA	NA	NA	NA	NA	NA	NA	NA	NA	NA
MUSK	LCNL1	SERPINF1	SUOX	NA	NA	NA	NA	NA	NA	NA	NA	NA	NA	NA
MYADML2	LIAS	SESN1	SVIL	NA	NA	NA	NA	NA	NA	NA	NA	NA	NA	NA
MYEOV	LIG4	SESN2	TAF4	NA	NA	NA	NA	NA	NA	NA	NA	NA	NA	NA
NETO1	LIPM	SFRP2	TET3	NA	NA	NA	NA	NA	NA	NA	NA	NA	NA	NA
NQO1	LONRF3	SHC3	TIGD2	NA	NA	NA	NA	NA	NA	NA	NA	NA	NA	NA
NRIP3	LRG1	SIRT4	TMEM140	NA	NA	NA	NA	NA	NA	NA	NA	NA	NA	NA
NUPL2	LRRC27	SLC22A15	TMEM177	NA	NA	NA	NA	NA	NA	NA	NA	NA	NA	NA
OLFM1	LRTM1	SLC2A11	TNIK	NA	NA	NA	NA	NA	NA	NA	NA	NA	NA	NA
OPN3	MALT1	SLC7A8	TNRC6C	NA	NA	NA	NA	NA	NA	NA	NA	NA	NA	NA
OR10C1	MAP3K13	SNRNP48	TPP1	NA	NA	NA	NA	NA	NA	NA	NA	NA	NA	NA
OR3A3	MATN3	SOX4	TRAF1	NA	NA	NA	NA	NA	NA	NA	NA	NA	NA	NA
OR4D11	MCF2L	SPATA2	TRIM4	NA	NA	NA	NA	NA	NA	NA	NA	NA	NA	NA
OR7C2	MED22	SPP1	TRIM68	NA	NA	NA	NA	NA	NA	NA	NA	NA	NA	NA
OTUD6A	MFNG	ST5	TSC22D3	NA	NA	NA	NA	NA	NA	NA	NA	NA	NA	NA
OXSR1	MLANA	STC2	USP30	NA	NA	NA	NA	NA	NA	NA	NA	NA	NA	NA
PACRGL	MMP25	STOM	VDR	NA	NA	NA	NA	NA	NA	NA	NA	NA	NA	NA
PARP1	MRAP	SVIL	VEGFA	NA	NA	NA	NA	NA	NA	NA	NA	NA	NA	NA
PAX7	MSX2	TET3	VGLL3	NA	NA	NA	NA	NA	NA	NA	NA	NA	NA	NA
PAXIP1	MTMR14	TFEB	WWP2	NA	NA	NA	NA	NA	NA	NA	NA	NA	NA	NA
PCDH1	MUC2	TMEM144	YPEL2	NA	NA	NA	NA	NA	NA	NA	NA	NA	NA	NA
PCDHB13	MUSK	TMEM177	ZBTB44	NA	NA	NA	NA	NA	NA	NA	NA	NA	NA	NA
PCMT1	MYEOV	TNFRSF10B	ZFYVE1	NA	NA	NA	NA	NA	NA	NA	NA	NA	NA	NA
PER3	NCK1	TNNT3	ZNF232	NA	NA	NA	NA	NA	NA	NA	NA	NA	NA	NA
PHLDA1	NDOR1	TNRC6C	ZNF419	NA	NA	NA	NA	NA	NA	NA	NA	NA	NA	NA
PHLDB2	NDUFA10	TOMM40L	ZNF425	NA	NA	NA	NA	NA	NA	NA	NA	NA	NA	NA
PI4K2B	NHSL2	TOP2A	ZNF451	NA	NA	NA	NA	NA	NA	NA	NA	NA	NA	NA
PIGW	NIPSNAP3B	TP53INP1	ZNF514	NA	NA	NA	NA	NA	NA	NA	NA	NA	NA	NA
PKLR	NOVA2	TRAF1	ZNF552	NA	NA	NA	NA	NA	NA	NA	NA	NA	NA	NA
PLK2	NPFFR1	TRIM4	ZNF589	NA	NA	NA	NA	NA	NA	NA	NA	NA	NA	NA
PLLP	NTNG1	TSC22D3	ZNF599	NA	NA	NA	NA	NA	NA	NA	NA	NA	NA	NA
PODXL	OR10G8	UAP1L1	ZNF618	NA	NA	NA	NA	NA	NA	NA	NA	NA	NA	NA
POLD3	OR10H1	USP29	ZNF638	NA	NA	NA	NA	NA	NA	NA	NA	NA	NA	NA
PPAT	OR1E1	VEGFA	ZNF671	NA	NA	NA	NA	NA	NA	NA	NA	NA	NA	NA
PPP4R1L	OR51B6	VWCE	ZNF691	NA	NA	NA	NA	NA	NA	NA	NA	NA	NA	NA
PPP6R2	OR5A1	WBP2	ZNF773	NA	NA	NA	NA	NA	NA	NA	NA	NA	NA	NA
PRPS2	OR7C1	WSB1	ZNF774	NA	NA	NA	NA	NA	NA	NA	NA	NA	NA	NA
PRSS22	OR7C2	ZFHX2	ZSCAN21	NA	NA	NA	NA	NA	NA	NA	NA	NA	NA	NA
PTGES3	ORMDL1	ZFYVE1	NA	NA	NA	NA	NA	NA	NA	NA	NA	NA	NA	NA
PTMA	OTOP2	ZKSCAN3	NA	NA	NA	NA	NA	NA	NA	NA	NA	NA	NA	NA
PTPN3	OTP	ZMAT3	NA	NA	NA	NA	NA	NA	NA	NA	NA	NA	NA	NA
PTPN6	OTUD6A	ZNF202	NA	NA	NA	NA	NA	NA	NA	NA	NA	NA	NA	NA
RAB18	PABPC3	ZNF232	NA	NA	NA	NA	NA	NA	NA	NA	NA	NA	NA	NA
RAMP3	PACRGL	ZNF419	NA	NA	NA	NA	NA	NA	NA	NA	NA	NA	NA	NA
RASA2	PATE1	ZNF425	NA	NA	NA	NA	NA	NA	NA	NA	NA	NA	NA	NA
RAVER1	PAX7	ZNF451	NA	NA	NA	NA	NA	NA	NA	NA	NA	NA	NA	NA
RBM6	PBX1	ZNF513	NA	NA	NA	NA	NA	NA	NA	NA	NA	NA	NA	NA
RCC2	PCGF3	ZNF552	NA	NA	NA	NA	NA	NA	NA	NA	NA	NA	NA	NA
RETN	PFDN4	ZNF589	NA	NA	NA	NA	NA	NA	NA	NA	NA	NA	NA	NA
RFWD3	PGC	ZNF691	NA	NA	NA	NA	NA	NA	NA	NA	NA	NA	NA	NA
RGL3	PGLYRP2	ZNF773	NA	NA	NA	NA	NA	NA	NA	NA	NA	NA	NA	NA
RHOA	PGR	ZNF785	NA	NA	NA	NA	NA	NA	NA	NA	NA	NA	NA	NA
RPL13P5	PKLR	ZNF79	NA	NA	NA	NA	NA	NA	NA	NA	NA	NA	NA	NA
RRN3	PLSCR1	ZSCAN30	NA	NA	NA	NA	NA	NA	NA	NA	NA	NA	NA	NA
SACM1L	PLXNA4	NA	NA	NA	NA	NA	NA	NA	NA	NA	NA	NA	NA	NA
SCGB3A1	POM121L12	NA	NA	NA	NA	NA	NA	NA	NA	NA	NA	NA	NA	NA
SCOC	PPP1R16B	NA	NA	NA	NA	NA	NA	NA	NA	NA	NA	NA	NA	NA
SERAC1	PPP6R2	NA	NA	NA	NA	NA	NA	NA	NA	NA	NA	NA	NA	NA
SFI1	PRKAA2	NA	NA	NA	NA	NA	NA	NA	NA	NA	NA	NA	NA	NA
SFMBT1	PRKY	NA	NA	NA	NA	NA	NA	NA	NA	NA	NA	NA	NA	NA
SHISA7	PROM2	NA	NA	NA	NA	NA	NA	NA	NA	NA	NA	NA	NA	NA
SLC14A2	PRRG2	NA	NA	NA	NA	NA	NA	NA	NA	NA	NA	NA	NA	NA
SLC17A3	PRSS22	NA	NA	NA	NA	NA	NA	NA	NA	NA	NA	NA	NA	NA
SLC23A3	PTPN6	NA	NA	NA	NA	NA	NA	NA	NA	NA	NA	NA	NA	NA
SLC2A1	RAB27A	NA	NA	NA	NA	NA	NA	NA	NA	NA	NA	NA	NA	NA
SLC30A3	RAB37	NA	NA	NA	NA	NA	NA	NA	NA	NA	NA	NA	NA	NA
SLC32A1	RABEP1	NA	NA	NA	NA	NA	NA	NA	NA	NA	NA	NA	NA	NA
SLC35A3	RASSF4	NA	NA	NA	NA	NA	NA	NA	NA	NA	NA	NA	NA	NA
SLC6A5	REEP1	NA	NA	NA	NA	NA	NA	NA	NA	NA	NA	NA	NA	NA
SLCO2A1	RETN	NA	NA	NA	NA	NA	NA	NA	NA	NA	NA	NA	NA	NA
SMC3	RETSAT	NA	NA	NA	NA	NA	NA	NA	NA	NA	NA	NA	NA	NA
SMC5	RHOQ	NA	NA	NA	NA	NA	NA	NA	NA	NA	NA	NA	NA	NA
SMCR8	RIPK3	NA	NA	NA	NA	NA	NA	NA	NA	NA	NA	NA	NA	NA
SNORA71C	RNF212	NA	NA	NA	NA	NA	NA	NA	NA	NA	NA	NA	NA	NA
SNRPD2P2	RNF216	NA	NA	NA	NA	NA	NA	NA	NA	NA	NA	NA	NA	NA
SPNS3	RNFT2	NA	NA	NA	NA	NA	NA	NA	NA	NA	NA	NA	NA	NA
SPRR3	RPP25	NA	NA	NA	NA	NA	NA	NA	NA	NA	NA	NA	NA	NA
SSH1	SAMD13	NA	NA	NA	NA	NA	NA	NA	NA	NA	NA	NA	NA	NA
ST8SIA3	SCPEP1	NA	NA	NA	NA	NA	NA	NA	NA	NA	NA	NA	NA	NA
STAG1	SCT	NA	NA	NA	NA	NA	NA	NA	NA	NA	NA	NA	NA	NA
SUSD5	SCUBE1	NA	NA	NA	NA	NA	NA	NA	NA	NA	NA	NA	NA	NA
SYTL1	SEC14L4	NA	NA	NA	NA	NA	NA	NA	NA	NA	NA	NA	NA	NA
TACR2	SESTD1	NA	NA	NA	NA	NA	NA	NA	NA	NA	NA	NA	NA	NA
TANK	SH2D1A	NA	NA	NA	NA	NA	NA	NA	NA	NA	NA	NA	NA	NA
TAOK3	SHMT1	NA	NA	NA	NA	NA	NA	NA	NA	NA	NA	NA	NA	NA
TCF23	SIGLEC14	NA	NA	NA	NA	NA	NA	NA	NA	NA	NA	NA	NA	NA
TCTEX1D4	SLC14A2	NA	NA	NA	NA	NA	NA	NA	NA	NA	NA	NA	NA	NA
TDRD10	SLC15A2	NA	NA	NA	NA	NA	NA	NA	NA	NA	NA	NA	NA	NA
TFAM	SLC22A1	NA	NA	NA	NA	NA	NA	NA	NA	NA	NA	NA	NA	NA
TFDP1	SLC23A3	NA	NA	NA	NA	NA	NA	NA	NA	NA	NA	NA	NA	NA
TFF2	SLC25A15	NA	NA	NA	NA	NA	NA	NA	NA	NA	NA	NA	NA	NA
TGFBR1	SLC29A4	NA	NA	NA	NA	NA	NA	NA	NA	NA	NA	NA	NA	NA
TH	SLC2A13	NA	NA	NA	NA	NA	NA	NA	NA	NA	NA	NA	NA	NA
THBS3	SLC30A3	NA	NA	NA	NA	NA	NA	NA	NA	NA	NA	NA	NA	NA
TM4SF5	SLC30A6	NA	NA	NA	NA	NA	NA	NA	NA	NA	NA	NA	NA	NA
TMEM19	SLC32A1	NA	NA	NA	NA	NA	NA	NA	NA	NA	NA	NA	NA	NA
TMEM87B	SLC35F5	NA	NA	NA	NA	NA	NA	NA	NA	NA	NA	NA	NA	NA
TMPRSS6	SLC38A1	NA	NA	NA	NA	NA	NA	NA	NA	NA	NA	NA	NA	NA
TOPBP1	SLC5A10	NA	NA	NA	NA	NA	NA	NA	NA	NA	NA	NA	NA	NA
TRMT6	SLC5A2	NA	NA	NA	NA	NA	NA	NA	NA	NA	NA	NA	NA	NA
TRPM7	SLC6A5	NA	NA	NA	NA	NA	NA	NA	NA	NA	NA	NA	NA	NA
TSFM	SMCHD1	NA	NA	NA	NA	NA	NA	NA	NA	NA	NA	NA	NA	NA
TSN	SNRPD2P2	NA	NA	NA	NA	NA	NA	NA	NA	NA	NA	NA	NA	NA
TTC9B	SNX14	NA	NA	NA	NA	NA	NA	NA	NA	NA	NA	NA	NA	NA
TTLL9	SPAG7	NA	NA	NA	NA	NA	NA	NA	NA	NA	NA	NA	NA	NA
TUBGCP3	ST7L	NA	NA	NA	NA	NA	NA	NA	NA	NA	NA	NA	NA	NA
UBA2	ST8SIA3	NA	NA	NA	NA	NA	NA	NA	NA	NA	NA	NA	NA	NA
UBE2B	STAG2	NA	NA	NA	NA	NA	NA	NA	NA	NA	NA	NA	NA	NA
UBXN4	STEAP1	NA	NA	NA	NA	NA	NA	NA	NA	NA	NA	NA	NA	NA
URB2	SYPL1	NA	NA	NA	NA	NA	NA	NA	NA	NA	NA	NA	NA	NA
USP1	TACC2	NA	NA	NA	NA	NA	NA	NA	NA	NA	NA	NA	NA	NA
VAV2	TCEANC	NA	NA	NA	NA	NA	NA	NA	NA	NA	NA	NA	NA	NA
VPREB3	TCFL5	NA	NA	NA	NA	NA	NA	NA	NA	NA	NA	NA	NA	NA
VWA2	TDP2	NA	NA	NA	NA	NA	NA	NA	NA	NA	NA	NA	NA	NA
WDFY4	TERF1	NA	NA	NA	NA	NA	NA	NA	NA	NA	NA	NA	NA	NA
WDR38	TEX101	NA	NA	NA	NA	NA	NA	NA	NA	NA	NA	NA	NA	NA
WNT1	TFAM	NA	NA	NA	NA	NA	NA	NA	NA	NA	NA	NA	NA	NA
WNT4	TFR2	NA	NA	NA	NA	NA	NA	NA	NA	NA	NA	NA	NA	NA
XPO1	TMEM38B	NA	NA	NA	NA	NA	NA	NA	NA	NA	NA	NA	NA	NA
ZC3H12D	TMEM50B	NA	NA	NA	NA	NA	NA	NA	NA	NA	NA	NA	NA	NA
ZC3H13	TNFRSF18	NA	NA	NA	NA	NA	NA	NA	NA	NA	NA	NA	NA	NA
ZDHHC5	TNFRSF4	NA	NA	NA	NA	NA	NA	NA	NA	NA	NA	NA	NA	NA
ZIC4	TOMM20L	NA	NA	NA	NA	NA	NA	NA	NA	NA	NA	NA	NA	NA
ZNF205	TOR1B	NA	NA	NA	NA	NA	NA	NA	NA	NA	NA	NA	NA	NA
ZNF365	TPO	NA	NA	NA	NA	NA	NA	NA	NA	NA	NA	NA	NA	NA
ZNF367	TRAF1	NA	NA	NA	NA	NA	NA	NA	NA	NA	NA	NA	NA	NA
ZNF479	TREX2	NA	NA	NA	NA	NA	NA	NA	NA	NA	NA	NA	NA	NA
ZNF560	TRIM29	NA	NA	NA	NA	NA	NA	NA	NA	NA	NA	NA	NA	NA
ZNF680	TRIM62	NA	NA	NA	NA	NA	NA	NA	NA	NA	NA	NA	NA	NA
ZSCAN1	TRPM3	NA	NA	NA	NA	NA	NA	NA	NA	NA	NA	NA	NA	NA
ZYG11A	TRPM5	NA	NA	NA	NA	NA	NA	NA	NA	NA	NA	NA	NA	NA
NA	TRPV5	NA	NA	NA	NA	NA	NA	NA	NA	NA	NA	NA	NA	NA
NA	TSPAN15	NA	NA	NA	NA	NA	NA	NA	NA	NA	NA	NA	NA	NA
NA	TTC16	NA	NA	NA	NA	NA	NA	NA	NA	NA	NA	NA	NA	NA
NA	TTC39A	NA	NA	NA	NA	NA	NA	NA	NA	NA	NA	NA	NA	NA
NA	TTL	NA	NA	NA	NA	NA	NA	NA	NA	NA	NA	NA	NA	NA
NA	TTLL9	NA	NA	NA	NA	NA	NA	NA	NA	NA	NA	NA	NA	NA
NA	UBE2G2	NA	NA	NA	NA	NA	NA	NA	NA	NA	NA	NA	NA	NA
NA	UBR4	NA	NA	NA	NA	NA	NA	NA	NA	NA	NA	NA	NA	NA
NA	UNC13A	NA	NA	NA	NA	NA	NA	NA	NA	NA	NA	NA	NA	NA
NA	UNC5CL	NA	NA	NA	NA	NA	NA	NA	NA	NA	NA	NA	NA	NA
NA	VGLL2	NA	NA	NA	NA	NA	NA	NA	NA	NA	NA	NA	NA	NA
NA	VMAC	NA	NA	NA	NA	NA	NA	NA	NA	NA	NA	NA	NA	NA
NA	VPREB3	NA	NA	NA	NA	NA	NA	NA	NA	NA	NA	NA	NA	NA
NA	VSTM2A	NA	NA	NA	NA	NA	NA	NA	NA	NA	NA	NA	NA	NA
NA	VWA2	NA	NA	NA	NA	NA	NA	NA	NA	NA	NA	NA	NA	NA
NA	WASF3	NA	NA	NA	NA	NA	NA	NA	NA	NA	NA	NA	NA	NA
NA	WDFY4	NA	NA	NA	NA	NA	NA	NA	NA	NA	NA	NA	NA	NA
NA	WDR38	NA	NA	NA	NA	NA	NA	NA	NA	NA	NA	NA	NA	NA
NA	WFDC2	NA	NA	NA	NA	NA	NA	NA	NA	NA	NA	NA	NA	NA
NA	WNK3	NA	NA	NA	NA	NA	NA	NA	NA	NA	NA	NA	NA	NA
NA	WNT1	NA	NA	NA	NA	NA	NA	NA	NA	NA	NA	NA	NA	NA
NA	WNT4	NA	NA	NA	NA	NA	NA	NA	NA	NA	NA	NA	NA	NA
NA	ZBTB8OS	NA	NA	NA	NA	NA	NA	NA	NA	NA	NA	NA	NA	NA
NA	ZC3H12D	NA	NA	NA	NA	NA	NA	NA	NA	NA	NA	NA	NA	NA
NA	ZCRB1	NA	NA	NA	NA	NA	NA	NA	NA	NA	NA	NA	NA	NA
NA	ZFP2	NA	NA	NA	NA	NA	NA	NA	NA	NA	NA	NA	NA	NA
NA	ZIC4	NA	NA	NA	NA	NA	NA	NA	NA	NA	NA	NA	NA	NA
NA	ZNF420	NA	NA	NA	NA	NA	NA	NA	NA	NA	NA	NA	NA	NA
NA	ZNF430	NA	NA	NA	NA	NA	NA	NA	NA	NA	NA	NA	NA	NA
NA	ZNF560	NA	NA	NA	NA	NA	NA	NA	NA	NA	NA	NA	NA	NA
NA	ZSCAN1	NA	NA	NA	NA	NA	NA	NA	NA	NA	NA	NA	NA	NA

## Sheet: GSE59861_24h_EMTAB2086
X1_sets_EMTAB2086_70_vs_30	X1_sets_EMTAB2086_80_vs_30	X1_sets_GSE59861_24h_2Gy	X1_sets_GSE59861_24h_5cGy	X2_sets_EMTAB2086_70_vs_30_EMTAB2086_80_vs_30	X2_sets_EMTAB2086_70_vs_30_GSE59861_24h_2Gy	X2_sets_EMTAB2086_70_vs_30_GSE59861_24h_5cGy	X2_sets_EMTAB2086_80_vs_30_GSE59861_24h_2Gy	X2_sets_EMTAB2086_80_vs_30_GSE59861_24h_5cGy	X2_sets_GSE59861_24h_2Gy_GSE59861_24h_5cGy	X3_sets_EMTAB2086_70_vs_30_EMTAB2086_80_vs_30_GSE59861_24h_2Gy	X3_sets_EMTAB2086_70_vs_30_EMTAB2086_80_vs_30_GSE59861_24h_5cGy	X3_sets_EMTAB2086_70_vs_30_GSE59861_24h_2Gy_GSE59861_24h_5cGy	X3_sets_EMTAB2086_80_vs_30_GSE59861_24h_2Gy_GSE59861_24h_5cGy	X4_sets_EMTAB2086_70_vs_30_EMTAB2086_80_vs_30_GSE59861_24h_2Gy_GSE59861_24h_5cGy
ABCA2	A2M	ABCA1	ABCA1	ABCA2	AHNAK2	AHNAK2	ACOX1	AHNAK2	ABCA1	AHNAK2	AHNAK2	AHNAK2	AHNAK2	AHNAK2
ABCB1	ABAT	ABHD6	ABCB4	ABCB1	ANXA4	ANXA4	AHNAK2	ANK1	ABHD6	ANXA4	ANXA4	ANXA4	ANK1	ANXA4
ABL2	ABCA12	ACOT13	ABHD6	ABL2	ASAH1	CHAC1	ANK1	ANXA4	ACSF2	ASAH1	CLN8	CHAC1	ANXA4	CLN8
ACTBL2	ABCA2	ACOX1	ACSF2	ACTBL2	BAX	CLN8	ANXA4	CACNA2D3	ADA	BBS2	CMBL	CLN8	CACNA2D3	CMBL
ACTR10	ABCA3	ACP6	ADA	ACTR10	BBS2	CMBL	ASAH1	CAMLG	AFF3	BCL2L1	CNIH3	CMBL	CAMLG	CNIH3
ACYP2	ABCA4	ACSF2	AFF3	ACYP2	BCL2L1	CNIH3	BBS2	CELF2	AHNAK2	BTG2	EDA2R	CNIH3	CELF2	EDA2R
ADAM19	ABCA7	ADA	AHNAK2	ADAM19	BTG2	CTSK	BCL2L1	CLN8	AKNA	CD109	EGR2	CTSK	CLN8	EGR2
ADAMTS12	ABCB1	ADAM10	AKAP1	ADAMTS12	CD109	EDA2R	BTG2	CMBL	AKR1C3	CDKN1A	FBN2	EDA2R	CMBL	FBN2
ADAMTSL5	ABCD1	ADSSL1	AKNA	ADAMTSL5	CDKN1A	EGR2	CACNA2D3	CNIH3	ALDH7A1	CLN8	FBXL2	EGR2	CNIH3	FBXL2
ADD3	ABHD12	AFF3	AKR1C3	AGRN	CHAC1	FBN2	CAMLG	CPE	ANGPTL2	CMBL	FRY	FBN2	DCLK1	FRY
AGRN	ABL2	AHNAK2	ALDH7A1	AHNAK2	CLN8	FBXL2	CD109	DCLK1	ANK1	CNIH3	GDF15	FBXL2	DIRC2	GDF15
AHNAK2	ABLIM1	AKNA	AMBP	AIG1	CMBL	FRY	CD59	DIRC2	ANKDD1A	CYFIP2	GDF6	FRY	EDA2R	GDF6
AIG1	ABLIM3	AKR1C3	ANAPC16	ANGPT1	CNIH3	GDF15	CDKL3	EDA2R	ANXA4	DRAM1	IDUA	GDF15	EGR2	IGDCC4
ANGPT1	ABTB2	AKTIP	ANGEL2	ANGPTL4	CTSK	GDF6	CDKN1A	EGR2	APCDD1	EDA2R	IGDCC4	GDF6	ERMAP	KCNH1
ANGPTL4	ACAA1	ALAD	ANGPTL2	ANKH	CYFIP2	IDUA	CELF2	ERMAP	APOL3	EGR2	IGF2R	IGDCC4	FBN2	KIT
ANKH	ACER1	ALDH7A1	ANK1	ANKRA2	DRAM1	IGDCC4	CES2	F2RL2	AQP11	EPS8L2	KCNH1	KCNH1	FBXL2	MAMDC2
ANKRA2	ACER2	ALPK1	ANKDD1A	ANKRD1	EDA2R	IGF2R	CLCN5	FBN2	ARHGEF3	FBN2	KIT	KIT	FIBIN	OPTN
ANKRD1	ACOX1	ANGPTL2	ANXA4	ANKRD42	EGR2	KCNH1	CLN8	FBXL2	ARL4C	FBXL2	LAMA1	MAMDC2	FRY	OSBPL3
ANKRD42	ACSL5	ANK1	APCDD1	ANKRD44	EPS8L2	KIT	CMBL	FIBIN	ARMC9	FRY	LPCAT2	OPTN	GDF15	PAMR1
ANKRD44	ACTBL2	ANKDD1A	APOL3	ANO10	FBN2	LAMA1	CNIH3	FRY	ASAP3	GDF15	MAMDC2	OSBPL3	GDF6	SERTAD4
ANO10	ACTR10	ANXA4	APPL1	ANXA4	FBXL2	LPCAT2	COL4A3BP	GDE1	ATF4	GDF6	OPTN	PAMR1	HDAC11	SGK1
ANO6	ACVR2A	APCDD1	AQP11	APBB2	FRY	MAMDC2	CYFIP2	GDF15	ATXN7L1	GOLGB1	OSBPL3	SERTAD4	IGDCC4	SHC3
ANXA4	ACYP2	APOBEC3C	ARHGEF3	ARHGAP26	GDF15	MMP2	DCLK1	GDF6	BCDIN3D	HIVEP1	PAMR1	SESN2	IGF1R	SP100
APBB2	ADAM12	APOL3	ARL4C	ARHGAP31	GDF6	OPTN	DIRC2	HDAC11	BDKRB2	IGDCC4	SERTAD4	SGK1	JUP	SVIL
ARHGAP10	ADAM19	AQP11	ARMC9	ARHGAP5	GOLGB1	OSBPL3	DRAM1	HNF4A	BOD1	ITPR2	SGK1	SHC3	KCNH1	NA
ARHGAP26	ADAM23	ARHGAP12	ART5	ARRDC1	HIVEP1	PAMR1	EDA2R	HSD17B2	BPTF	KCNH1	SHC3	SP100	KIF26B	NA
ARHGAP31	ADAM32	ARHGAP22	ASAP3	ARSK	IGDCC4	SERTAD4	EGR2	IDUA	C11ORF71	KIAA1324	SLC31A2	SVIL	KIT	NA
ARHGAP5	ADAMTS12	ARHGEF3	ATF2	ASAH1	ITPR2	SESN2	EPB41L1	IGDCC4	C12ORF65	KIT	SP100	NA	KLHL24	NA
ARRDC1	ADAMTS13	ARL4C	ATF4	ASAP2	KCNH1	SGK1	EPS8L2	IGF1R	C12ORF76	MAMDC2	SVIL	NA	MAMDC2	NA
ARSK	ADAMTSL4	ARMC9	ATXN7L1	ASCC3	KIAA1324	SHC3	ERMAP	IGF2R	C14ORF93	MDM2	YPEL2	NA	MSI2	NA
ASAH1	ADAMTSL5	ARMCX1	BBS12	ATP10A	KIT	SLC31A2	FAM198B	JUP	C1RL	MR1	NA	NA	OPRL1	NA
ASAP2	ADCK2	ARNT	BCDIN3D	ATP11A	MAMDC2	SP100	FBN2	KCNH1	C2ORF49	NFAT5	NA	NA	OPTN	NA
ASCC3	ADCY6	ARPC3	BDKRB2	ATP13A2	MDM2	SVIL	FBXL2	KIF26B	CACNA2D3	OPTN	NA	NA	ORAI3	NA
ATP10A	ADHFE1	ASAH1	BFSP1	ATP6AP2	MR1	YPEL2	FIBIN	KIT	CADM1	OSBPL3	NA	NA	OSBPL3	NA
ATP11A	ADIPOR1	ASAP3	BMP4	ATP6V0A1	NFAT5	NA	FRY	KLHL24	CAMLG	PAMR1	NA	NA	PAMR1	NA
ATP13A2	ADRA2C	ATF4	BOD1	ATP9A	OPTN	NA	FUCA1	LAMA1	CCDC115	PCDHB14	NA	NA	POLH	NA
ATP6AP2	ADRB2	ATG14	BPTF	B4GALNT1	OSBPL3	NA	GDF15	LPCAT2	CDKN1C	PHLDA3	NA	NA	PPFIA1	NA
ATP6V0A1	AES	ATG2B	BRD7	BACH1	PAMR1	NA	GDF6	MAMDC2	CELF2	PPP1R3C	NA	NA	PYGL	NA
ATP9A	AFAP1	ATP6V1B2	C11ORF71	BAIAP2L1	PCDHB14	NA	GOLGB1	MAPK3	CEP250	PTPN13	NA	NA	RCOR3	NA
B2M	AFF1	ATRX	C12ORF65	BANK1	PHLDA3	NA	HDAC11	MSI2	CHAC1	QPRT	NA	NA	RRAGC	NA
B4GALNT1	AGRN	ATXN7L1	C12ORF76	BBS2	PPP1R3C	NA	HIVEP1	MXI1	CHD3	RPS27L	NA	NA	SATB1	NA
BAALC	AGXT	AUH	C14ORF93	BCL2L1	PTPN13	NA	IGDCC4	OPRL1	CLCN7	SAMD12	NA	NA	SCIN	NA
BACH1	AHCYL2	B3GALT4	C1RL	BHLHE40	QPRT	NA	IGF1R	OPTN	CLK2	SAT1	NA	NA	SERTAD4	NA
BAIAP2L1	AHNAK2	B4GALNT4	C2ORF49	BLCAP	RPS27L	NA	IL10RB	ORAI3	CLN8	SERTAD4	NA	NA	SGK1	NA
BANK1	AIG1	BAX	C2ORF68	BLOC1S2	SAMD12	NA	ISCU	OSBPL3	CLUAP1	SESN1	NA	NA	SHC3	NA
BAX	AK4	BBC3	CA9	BLZF1	SAT1	NA	ITPR2	PAMR1	CMBL	SGK1	NA	NA	SLC22A15	NA
BBS2	AKAP6	BBS2	CACNA2D3	BPGM	SERTAD4	NA	JUP	POLH	CNIH3	SHC3	NA	NA	SLC2A11	NA
BBS9	ALDH5A1	BCDIN3D	CADM1	BTG2	SESN1	NA	KCNH1	PPFIA1	CPT1C	SP100	NA	NA	SP100	NA
BCL2L1	ALDOAP2	BCL2L1	CAMLG	BTN2A2	SESN2	NA	KIAA1324	PTPRK	CRIPAK	SPATA18	NA	NA	ST3GAL6	NA
BHLHE40	ALKBH6	BCL2L13	CARD10	BTRC	SGK1	NA	KIF26B	PYGL	CRTAP	SVIL	NA	NA	SVIL	NA
BIRC3	ALPK2	BDKRB2	CARD8	C14ORF28	SHC3	NA	KIT	RCOR3	CTNS	TMEM217	NA	NA	SYPL2	NA
BLCAP	ALS2CL	BEX4	CCDC115	C1ORF54	SLC16A4	NA	KLHL24	RRAGC	CTSK	TNFRSF10B	NA	NA	TMEM187	NA
BLOC1S2	AMIGO1	BOD1	CCDC8	C3ORF35	SP100	NA	KRT17	SATB1	DAPK1	TNFRSF10D	NA	NA	ZNF425	NA
BLZF1	AMIGO2	BPTF	CD3E	C3ORF52	SPATA18	NA	LYNX1	SCIN	DBP	TP53INP1	NA	NA	NA	NA
BPGM	AMPD1	BRI3	CDA	C4ORF3	SVIL	NA	MAMDC2	SERTAD4	DCLK1	TRIM22	NA	NA	NA	NA
BTBD3	AMPD3	BTG2	CDKN1C	C4ORF36	TMEM217	NA	MDM2	SGK1	DCP1B	ZMAT3	NA	NA	NA	NA
BTG2	AMZ1	C11ORF71	CELF2	C5AR1	TNFRSF10B	NA	MR1	SHC3	DDIT3	NA	NA	NA	NA	NA
BTN2A2	ANGPT1	C12ORF65	CELSR1	C5ORF15	TNFRSF10D	NA	MSI2	SLC22A15	DDIT4	NA	NA	NA	NA	NA
BTRC	ANGPTL4	C12ORF76	CEP250	C5ORF46	TP53INP1	NA	MYO1D	SLC2A11	DDX17	NA	NA	NA	NA	NA
C14ORF28	ANK1	C14ORF93	CHAC1	C7	TRIM22	NA	NFAT5	SLC31A2	DENND2A	NA	NA	NA	NA	NA
C16ORF72	ANK2	C18ORF21	CHD3	CACNA2D1	ZMAT3	NA	OPRL1	SLC6A6	DHRS3	NA	NA	NA	NA	NA
C1ORF54	ANKH	C1RL	CLCN7	CADM3	NA	NA	OPTN	SP100	DIRC2	NA	NA	NA	NA	NA
C2CD2	ANKRA2	C21ORF91	CLK2	CALCOCO1	NA	NA	ORAI3	ST3GAL6	DISP1	NA	NA	NA	NA	NA
C3ORF35	ANKRD1	C2ORF49	CLN8	CALD1	NA	NA	OSBPL3	SVIL	DMKN	NA	NA	NA	NA	NA
C3ORF52	ANKRD29	C7ORF69	CLUAP1	CAMTA2	NA	NA	PAMR1	SYPL2	DNAJC18	NA	NA	NA	NA	NA
C4ORF3	ANKRD37	CACNA2D3	CMBL	CAP2	NA	NA	PAPPA	TMEM187	DNM1	NA	NA	NA	NA	NA
C4ORF36	ANKRD42	CADM1	CNIH3	CASS4	NA	NA	PARD6G	YPEL2	DOCK3	NA	NA	NA	NA	NA
C5AR1	ANKRD44	CAMK2G	CNOT1	CCDC81	NA	NA	PCDHB14	ZBTB4	DPP4	NA	NA	NA	NA	NA
C5ORF15	ANKRD46	CAMLG	CPE	CCIN	NA	NA	PFKFB2	ZNF425	DYNC1H1	NA	NA	NA	NA	NA
C5ORF46	ANKRD52	CASP1	CPT1C	CCL2	NA	NA	PGM2L1	NA	E2F5	NA	NA	NA	NA	NA
C7	ANKS1B	CCDC102B	CRABP2	CCND1	NA	NA	PHLDA3	NA	EBF1	NA	NA	NA	NA	NA
CACNA2D1	ANO10	CCDC112	CREBBP	CCND2	NA	NA	PLSCR4	NA	EDA2R	NA	NA	NA	NA	NA
CADM3	ANTXR1	CCDC115	CRIPAK	CD109	NA	NA	POLH	NA	EFNB3	NA	NA	NA	NA	NA
CALCOCO1	ANXA4	CCDC93	CRTAP	CD46	NA	NA	POU2F2	NA	EGR2	NA	NA	NA	NA	NA
CALD1	ANXA6	CCL7	CTDSPL	CD63	NA	NA	PPFIA1	NA	EIF1B	NA	NA	NA	NA	NA
CAMTA2	APBB2	CCNG1	CTNS	CD9	NA	NA	PPP1R3C	NA	EPB41	NA	NA	NA	NA	NA
CAP2	APH1B	CD109	CTSK	CDH13	NA	NA	PTPN13	NA	EPHB4	NA	NA	NA	NA	NA
CASS4	APLP1	CD59	DAPK1	CDK6	NA	NA	PYGL	NA	ERMAP	NA	NA	NA	NA	NA
CCDC81	APOD	CD72	DBP	CDKN1A	NA	NA	QPRT	NA	FAM117A	NA	NA	NA	NA	NA
CCIN	AQP4	CDC42EP5	DCAF10	CDKN2B	NA	NA	RCOR3	NA	FAM180A	NA	NA	NA	NA	NA
CCL2	AR	CDKL3	DCLK1	CDYL2	NA	NA	RNF141	NA	FAM20A	NA	NA	NA	NA	NA
CCND1	AREG	CDKN1A	DCP1B	CENPT	NA	NA	RPS27L	NA	FAM20C	NA	NA	NA	NA	NA
CCND2	ARHGAP24	CDKN1C	DDIT3	CERCAM	NA	NA	RRAGC	NA	FAM76A	NA	NA	NA	NA	NA
CD109	ARHGAP26	CELF2	DDIT4	CFL2	NA	NA	SAMD12	NA	FANCF	NA	NA	NA	NA	NA
CD46	ARHGAP29	CENPBD1	DDX17	CFLAR	NA	NA	SAT1	NA	FBN2	NA	NA	NA	NA	NA
CD63	ARHGAP31	CEP250	DENND2A	CHIC2	NA	NA	SATB1	NA	FBXL2	NA	NA	NA	NA	NA
CD82	ARHGAP5	CEP57	DHRS3	CHPF	NA	NA	SCIN	NA	FBXL7	NA	NA	NA	NA	NA
CD9	ARHGAP9	CES2	DIRC2	CHRNA1	NA	NA	SERTAD4	NA	FIBIN	NA	NA	NA	NA	NA
CDC42EP3	ARHGDIB	CH25H	DISP1	CHST11	NA	NA	SESN1	NA	FLCN	NA	NA	NA	NA	NA
CDH13	ARHGEF37	CHAC1	DMKN	CITED2	NA	NA	SGK1	NA	FRY	NA	NA	NA	NA	NA
CDK6	ARHGEF4	CHD3	DNAJC18	CLDN1	NA	NA	SHC3	NA	GDF15	NA	NA	NA	NA	NA
CDKN1A	ARL6IP5	CHD9	DNM1	CLDN16	NA	NA	SLC22A15	NA	GDF6	NA	NA	NA	NA	NA
CDKN2B	ARMCX3	CLCN5	DOCK3	CLN5	NA	NA	SLC2A11	NA	GLI3	NA	NA	NA	NA	NA
CDYL2	ARRDC1	CLCN7	DPP4	CLN8	NA	NA	SLC5A3	NA	GNPDA1	NA	NA	NA	NA	NA
CENPT	ARRDC4	CLIP3	DPY19L3	CLTB	NA	NA	SNAPC3	NA	GPNMB	NA	NA	NA	NA	NA
CERCAM	ARSA	CLK2	DYNC1H1	CMBL	NA	NA	SP100	NA	GRAMD4	NA	NA	NA	NA	NA
CFH	ARSD	CLN8	E2F5	CMIP	NA	NA	SPATA18	NA	GRASP	NA	NA	NA	NA	NA
CFL2	ARSG	CLUAP1	EBF1	CMPK1	NA	NA	ST3GAL6	NA	HDAC11	NA	NA	NA	NA	NA
CFLAR	ARSK	CMBL	EDA2R	CNIH3	NA	NA	SVIL	NA	HEXIM2	NA	NA	NA	NA	NA
CHAC1	ARV1	CNIH3	EFNB3	CNNM1	NA	NA	SYPL2	NA	HMBOX1	NA	NA	NA	NA	NA
CHIC2	ASAH1	COL4A3BP	EGR2	COBLL1	NA	NA	TCEAL4	NA	HPS4	NA	NA	NA	NA	NA
CHPF	ASAP2	COQ10A	EIF1B	COG6	NA	NA	TMEM187	NA	HS1BP3	NA	NA	NA	NA	NA
CHRNA1	ASB16	CPT1C	EPB41	COL11A1	NA	NA	TMEM217	NA	IFI16	NA	NA	NA	NA	NA
CHST11	ASCC3	CRIPAK	EPHB4	COL8A1	NA	NA	TNFRSF10B	NA	IGDCC4	NA	NA	NA	NA	NA
CHST7	ASL	CRTAP	ERMAP	COPZ2	NA	NA	TNFRSF10D	NA	IGF1R	NA	NA	NA	NA	NA
CITED2	ATAD1	CRYM	F2RL2	COQ10B	NA	NA	TP53INP1	NA	INHBE	NA	NA	NA	NA	NA
CLDN1	ATG4A	CTNS	FAM117A	CPEB2	NA	NA	TRIM22	NA	IRF2	NA	NA	NA	NA	NA
CLDN12	ATL1	CTSA	FAM180A	CPEB4	NA	NA	TSPAN11	NA	IRF2BP2	NA	NA	NA	NA	NA
CLDN16	ATL3	CTSK	FAM20A	CPPED1	NA	NA	VWCE	NA	ITPKB	NA	NA	NA	NA	NA
CLN5	ATOX1	CTSS	FAM20C	CREB3	NA	NA	WDR60	NA	ITPR1	NA	NA	NA	NA	NA
CLN8	ATP10A	CUL4B	FAM76A	CSGALNACT2	NA	NA	WSB1	NA	JUP	NA	NA	NA	NA	NA
CLTB	ATP10D	CYFIP2	FANCF	CST3	NA	NA	ZMAT3	NA	KANK2	NA	NA	NA	NA	NA
CMBL	ATP11A	CYTH1	FBN2	CTBS	NA	NA	ZNF425	NA	KBTBD3	NA	NA	NA	NA	NA
CMIP	ATP13A2	D2HGDH	FBXL2	CTGF	NA	NA	ZNF610	NA	KCNH1	NA	NA	NA	NA	NA
CMPK1	ATP2B4	DAPK1	FBXL7	CTSO	NA	NA	NA	NA	KCNS3	NA	NA	NA	NA	NA
CNIH3	ATP2C1	DBP	FIBIN	CTSZ	NA	NA	NA	NA	KCTD7	NA	NA	NA	NA	NA
CNNM1	ATP6AP1	DCLK1	FLCN	CXCL10	NA	NA	NA	NA	KIAA0513	NA	NA	NA	NA	NA
CNST	ATP6AP2	DCP1B	FMO3	CYB5R1	NA	NA	NA	NA	KIAA1217	NA	NA	NA	NA	NA
CNTN3	ATP6V0A1	DDB2	FOXRED2	CYBA	NA	NA	NA	NA	KIAA1522	NA	NA	NA	NA	NA
COBLL1	ATP6V0A4	DDIT3	FRY	CYBRD1	NA	NA	NA	NA	KIAA1671	NA	NA	NA	NA	NA
COG5	ATP6V0E1	DDIT4	FZD2	CYFIP2	NA	NA	NA	NA	KIF13B	NA	NA	NA	NA	NA
COG6	ATP6V1E1	DDX17	GAB1	CYP2U1	NA	NA	NA	NA	KIF26B	NA	NA	NA	NA	NA
COL11A1	ATP6V1G1	DENND2A	GDE1	CYR61	NA	NA	NA	NA	KIT	NA	NA	NA	NA	NA
COL6A1	ATP7B	DHRS3	GDF15	DAP	NA	NA	NA	NA	KLF15	NA	NA	NA	NA	NA
COL8A1	ATP9A	DIRC2	GDF6	DDR2	NA	NA	NA	NA	KLHL24	NA	NA	NA	NA	NA
COPZ2	ATRN	DISP1	GEM	DDX58	NA	NA	NA	NA	LCORL	NA	NA	NA	NA	NA
COQ10B	ATRNL1	DMKN	GFPT2	DGKA	NA	NA	NA	NA	LDB2	NA	NA	NA	NA	NA
CPEB2	B3GAT2	DNAJC14	GLI3	DGKI	NA	NA	NA	NA	LETMD1	NA	NA	NA	NA	NA
CPEB4	B3GAT3	DNAJC18	GLIS1	DHRS7	NA	NA	NA	NA	LITAF	NA	NA	NA	NA	NA
CPPED1	B3GNT4	DNM1	GLIS2	DMD	NA	NA	NA	NA	LRRC15	NA	NA	NA	NA	NA
CREB3	B3GNT9	DOCK3	GNPDA1	DMPK	NA	NA	NA	NA	LRRC32	NA	NA	NA	NA	NA
CSGALNACT2	B4GALNT1	DPH5	GNS	DNAJB4	NA	NA	NA	NA	MAMDC2	NA	NA	NA	NA	NA
CST3	B4GALT1	DPP4	GPNMB	DNAJB9	NA	NA	NA	NA	MAN1C1	NA	NA	NA	NA	NA
CTAGE1	B4GALT7	DRAM1	GPRC5B	DNAJC6	NA	NA	NA	NA	MAP3K12	NA	NA	NA	NA	NA
CTBS	BACH1	DTNA	GRAMD4	DNASE1L1	NA	NA	NA	NA	MAP4K4	NA	NA	NA	NA	NA
CTGF	BAD	DUSP4	GRASP	DOCK9	NA	NA	NA	NA	MASP1	NA	NA	NA	NA	NA
CTHRC1	BAIAP2L1	DYNC1H1	HBZ	DOK1	NA	NA	NA	NA	MAST3	NA	NA	NA	NA	NA
CTSK	BANK1	E2F5	HDAC11	DRAM1	NA	NA	NA	NA	MBP	NA	NA	NA	NA	NA
CTSO	BBS2	EBF1	HEG1	DRP2	NA	NA	NA	NA	MCCC1	NA	NA	NA	NA	NA
CTSZ	BCAS3	EDA2R	HEXIM2	DSP	NA	NA	NA	NA	MEST	NA	NA	NA	NA	NA
CXCL10	BCL2L1	EFNB3	HMBOX1	DUSP3	NA	NA	NA	NA	METTL7A	NA	NA	NA	NA	NA
CYB5R1	BHLHE40	EGR2	HNF4A	DUSP6	NA	NA	NA	NA	MMP11	NA	NA	NA	NA	NA
CYBA	BLCAP	EIF1B	HNRNPD	DYNLT3	NA	NA	NA	NA	MORC2	NA	NA	NA	NA	NA
CYBRD1	BLOC1S2	EIF4G3	HPS4	EBI3	NA	NA	NA	NA	MRGPRF	NA	NA	NA	NA	NA
CYFIP2	BLZF1	ELP2	HS1BP3	ECM1	NA	NA	NA	NA	MSI2	NA	NA	NA	NA	NA
CYLD	BMP1	EML5	HSD17B2	EDA2R	NA	NA	NA	NA	MTHFR	NA	NA	NA	NA	NA
CYP2U1	BMP2	EPB41	IDUA	EDEM3	NA	NA	NA	NA	N4BP2L1	NA	NA	NA	NA	NA
CYR61	BMP6	EPB41L1	IFI16	EDIL3	NA	NA	NA	NA	NACAD	NA	NA	NA	NA	NA
DAP	BMPER	EPHB4	IFT140	EDN1	NA	NA	NA	NA	NDRG4	NA	NA	NA	NA	NA
DDR2	BPGM	EPS8L2	IGDCC4	EGR2	NA	NA	NA	NA	NEU1	NA	NA	NA	NA	NA
DDX58	BSDC1	ERMAP	IGF1R	ELFN1	NA	NA	NA	NA	NFATC4	NA	NA	NA	NA	NA
DGKA	BTBD1	EVC2	IGF2R	ENC1	NA	NA	NA	NA	NFIX	NA	NA	NA	NA	NA
DGKI	BTBD9	EXOC4	INHBE	EPHA2	NA	NA	NA	NA	NFX1	NA	NA	NA	NA	NA
DHRS7	BTG2	F2R	IP6K1	EPHX4	NA	NA	NA	NA	NIPAL4	NA	NA	NA	NA	NA
DMD	BTN2A2	FAHD1	IRF2	EPS8L2	NA	NA	NA	NA	NNT	NA	NA	NA	NA	NA
DMPK	BTRC	FAM117A	IRF2BP2	ERLEC1	NA	NA	NA	NA	NOV	NA	NA	NA	NA	NA
DNAJB4	C11ORF87	FAM118B	ITPKB	ERP44	NA	NA	NA	NA	NR2F2	NA	NA	NA	NA	NA
DNAJB9	C12ORF57	FAM122A	ITPR1	ERRFI1	NA	NA	NA	NA	NUMA1	NA	NA	NA	NA	NA
DNAJC28	C14ORF28	FAM180A	JUP	ETHE1	NA	NA	NA	NA	NYNRIN	NA	NA	NA	NA	NA
DNAJC6	C16ORF74	FAM198B	KANK2	ETNK2	NA	NA	NA	NA	OLFML2B	NA	NA	NA	NA	NA
DNASE1L1	C19ORF18	FAM20A	KBTBD3	ETV5	NA	NA	NA	NA	OPRL1	NA	NA	NA	NA	NA
DOCK9	C1ORF53	FAM20C	KCNH1	EVI5	NA	NA	NA	NA	OPTN	NA	NA	NA	NA	NA
DOK1	C1ORF54	FAM76A	KCNS3	EXPH5	NA	NA	NA	NA	ORAI3	NA	NA	NA	NA	NA
DRAM1	C1QTNF7	FANCF	KCTD7	EXTL1	NA	NA	NA	NA	OSBPL3	NA	NA	NA	NA	NA
DRP2	C20ORF194	FBN2	KDM5B	F3	NA	NA	NA	NA	PAMR1	NA	NA	NA	NA	NA
DSP	C21ORF62	FBXL2	KHNYN	FABP3	NA	NA	NA	NA	PBX3	NA	NA	NA	NA	NA
DUSP14	C2ORF66	FBXL7	KIAA0513	FADS3	NA	NA	NA	NA	PEAR1	NA	NA	NA	NA	NA
DUSP3	C3	FBXO22	KIAA1217	FAM151B	NA	NA	NA	NA	PELI3	NA	NA	NA	NA	NA
DUSP6	C3ORF35	FBXO25	KIAA1522	FAM174A	NA	NA	NA	NA	PER3	NA	NA	NA	NA	NA
DUSP8	C3ORF52	FBXW7	KIAA1671	FAM43A	NA	NA	NA	NA	PFKM	NA	NA	NA	NA	NA
DYNLT3	C3ORF70	FDXR	KIAA1958	FAP	NA	NA	NA	NA	PHF21A	NA	NA	NA	NA	NA
EBF3	C4ORF3	FIBIN	KIF13B	FAR2	NA	NA	NA	NA	PIAS1	NA	NA	NA	NA	NA
EBI3	C4ORF36	FIG4	KIF26B	FAS	NA	NA	NA	NA	PID1	NA	NA	NA	NA	NA
ECM1	C5AR1	FKTN	KIT	FBN1	NA	NA	NA	NA	PIM1	NA	NA	NA	NA	NA
EDA2R	C5ORF15	FLCN	KLF15	FBN2	NA	NA	NA	NA	PKIG	NA	NA	NA	NA	NA
EDEM3	C5ORF46	FLRT2	KLHDC7B	FBXL2	NA	NA	NA	NA	PLD1	NA	NA	NA	NA	NA
EDIL3	C6ORF222	FMNL2	KLHL24	FCGRT	NA	NA	NA	NA	PLEKHA4	NA	NA	NA	NA	NA
EDN1	C7	FNIP1	LAMA1	FCHSD2	NA	NA	NA	NA	POLG2	NA	NA	NA	NA	NA
EFNB2	C8ORF34	FOXK1	LCORL	FER1L4	NA	NA	NA	NA	POLH	NA	NA	NA	NA	NA
EGR2	C9ORF131	FRY	LDB2	FGD4	NA	NA	NA	NA	POLR3GL	NA	NA	NA	NA	NA
ELFN1	C9ORF170	FUCA1	LEF1	FHOD3	NA	NA	NA	NA	PPARG	NA	NA	NA	NA	NA
ENC1	CACNA1C	GAL3ST4	LETMD1	FLT1	NA	NA	NA	NA	PPARGC1A	NA	NA	NA	NA	NA
EPHA2	CACNA2D1	GCLC	LITAF	FMN1	NA	NA	NA	NA	PPFIA1	NA	NA	NA	NA	NA
EPHX4	CACNA2D3	GDF15	LPCAT2	FMOD	NA	NA	NA	NA	PPM1D	NA	NA	NA	NA	NA
EPRS	CACNG6	GDF5	LRP4	FNDC3B	NA	NA	NA	NA	PPP1R3B	NA	NA	NA	NA	NA
EPS8L2	CADM3	GDF6	LRRC15	FNDC4	NA	NA	NA	NA	PRMT2	NA	NA	NA	NA	NA
ERAP2	CALCA	GEMIN8	LRRC32	FOXE1	NA	NA	NA	NA	PRSS12	NA	NA	NA	NA	NA
ERLEC1	CALCOCO1	GGA2	MAMDC2	FRMD6	NA	NA	NA	NA	PTGES	NA	NA	NA	NA	NA
ERP44	CALCOCO2	GIGYF2	MAN1C1	FRY	NA	NA	NA	NA	PTGR1	NA	NA	NA	NA	NA
ERRFI1	CALD1	GLI3	MAOA	FSTL3	NA	NA	NA	NA	PTGS1	NA	NA	NA	NA	NA
ETHE1	CAMK1D	GM2A	MAP3K12	FZD6	NA	NA	NA	NA	PYGL	NA	NA	NA	NA	NA
ETNK2	CAMLG	GNPDA1	MAP4K4	GADD45A	NA	NA	NA	NA	RAB3IL1	NA	NA	NA	NA	NA
ETV5	CAMP	GOLGB1	MAPK3	GALNT10	NA	NA	NA	NA	RARA	NA	NA	NA	NA	NA
EVI5	CAMTA2	GPNMB	MASP1	GALNT5	NA	NA	NA	NA	RASSF4	NA	NA	NA	NA	NA
EXPH5	CAP2	GRAMD4	MAST3	GAS6	NA	NA	NA	NA	RCOR3	NA	NA	NA	NA	NA
EXTL1	CAPN6	GRASP	MAVS	GATA3	NA	NA	NA	NA	RFX5	NA	NA	NA	NA	NA
F3	CAPNS2	HCFC1R1	MBP	GBE1	NA	NA	NA	NA	RNF169	NA	NA	NA	NA	NA
FABP3	CAPS	HDAC11	MCCC1	GCNT2	NA	NA	NA	NA	RNF213	NA	NA	NA	NA	NA
FADS3	CASS4	HEXIM2	MEGF8	GCNT4	NA	NA	NA	NA	RNF214	NA	NA	NA	NA	NA
FAM151B	CATSPERG	HIBADH	MEST	GDF15	NA	NA	NA	NA	ROR2	NA	NA	NA	NA	NA
FAM174A	CBLN3	HIST1H2BD	METTL7A	GDF6	NA	NA	NA	NA	RPAIN	NA	NA	NA	NA	NA
FAM43A	CCDC113	HIVEP1	MGAT3	GDPD1	NA	NA	NA	NA	RPL28	NA	NA	NA	NA	NA
FAP	CCDC153	HMBOX1	MKNK2	GFPT1	NA	NA	NA	NA	RRAGC	NA	NA	NA	NA	NA
FAR2	CCDC50	HOXB13	MMP11	GIPC1	NA	NA	NA	NA	RUFY1	NA	NA	NA	NA	NA
FAS	CCDC68	HPS4	MMP2	GK5	NA	NA	NA	NA	RUNX1T1	NA	NA	NA	NA	NA
FBLIM1	CCDC69	HR	MORC2	GOLGB1	NA	NA	NA	NA	S100PBP	NA	NA	NA	NA	NA
FBN1	CCDC80	HS1BP3	MRGPRF	GPR108	NA	NA	NA	NA	SALL2	NA	NA	NA	NA	NA
FBN2	CCDC81	HSPBAP1	MRPL34	GPR137B	NA	NA	NA	NA	SAT2	NA	NA	NA	NA	NA
FBXL2	CCDC90B	HTATIP2	MSI2	GPR155	NA	NA	NA	NA	SATB1	NA	NA	NA	NA	NA
FCGRT	CCIN	IFFO1	MTHFR	GRAMD1B	NA	NA	NA	NA	SCIN	NA	NA	NA	NA	NA
FCHSD2	CCL2	IFI16	MXI1	GSN	NA	NA	NA	NA	SDCBP	NA	NA	NA	NA	NA
FER1L4	CCL28	IGDCC4	MYF5	GSTM3	NA	NA	NA	NA	SENP8	NA	NA	NA	NA	NA
FGD4	CCND1	IGF1R	N4BP2L1	GSTO1	NA	NA	NA	NA	SERPINF1	NA	NA	NA	NA	NA
FGF1	CCND2	IGF2BP2	NACAD	GYS1	NA	NA	NA	NA	SERTAD4	NA	NA	NA	NA	NA
FHOD3	CCNDBP1	IL10RB	NBEAL2	H6PD	NA	NA	NA	NA	SESN2	NA	NA	NA	NA	NA
FLT1	CD109	INHBE	NDRG4	HCN2	NA	NA	NA	NA	SETBP1	NA	NA	NA	NA	NA
FMN1	CD14	INPP4B	NEK6	HDAC9	NA	NA	NA	NA	SFRP2	NA	NA	NA	NA	NA
FMOD	CD151	IQCF1	NEU1	HEATR5A	NA	NA	NA	NA	SGK1	NA	NA	NA	NA	NA
FNDC3B	CD163L1	IRF2	NEURL2	HECW1	NA	NA	NA	NA	SH3BP5	NA	NA	NA	NA	NA
FNDC4	CD46	IRF2BP2	NFATC4	HECW2	NA	NA	NA	NA	SHC3	NA	NA	NA	NA	NA
FNIP2	CD55	ISCU	NFIX	HEXB	NA	NA	NA	NA	SLC12A8	NA	NA	NA	NA	NA
FOXC1	CD58	ITPKB	NFX1	HHAT	NA	NA	NA	NA	SLC22A15	NA	NA	NA	NA	NA
FOXE1	CD59	ITPR1	NHLRC3	HINT3	NA	NA	NA	NA	SLC2A11	NA	NA	NA	NA	NA
FRMD6	CD63	ITPR2	NIPAL4	HIST1H2BK	NA	NA	NA	NA	SLC2A12	NA	NA	NA	NA	NA
FRS2	CD9	JUP	NIT1	HIVEP1	NA	NA	NA	NA	SLC38A4	NA	NA	NA	NA	NA
FRY	CDC42BPB	KANK2	NNT	HIVEP2	NA	NA	NA	NA	SMARCAL1	NA	NA	NA	NA	NA
FSTL3	CDCP1	KBTBD3	NOV	HK2	NA	NA	NA	NA	SNCA	NA	NA	NA	NA	NA
FZD6	CDH1	KCNE3	NR2F2	HLA-F	NA	NA	NA	NA	SOX4	NA	NA	NA	NA	NA
GADD45A	CDH10	KCNH1	NTHL1	HM13	NA	NA	NA	NA	SP100	NA	NA	NA	NA	NA
GALNT10	CDH13	KCNS3	NUDT7	HSD17B14	NA	NA	NA	NA	SPECC1	NA	NA	NA	NA	NA
GALNT5	CDH22	KCTD7	NUMA1	ICAM4	NA	NA	NA	NA	ST3GAL6	NA	NA	NA	NA	NA
GARS	CDIPT	KDSR	NYNRIN	ICAM5	NA	NA	NA	NA	STAT2	NA	NA	NA	NA	NA
GAS6	CDK6	KIAA0513	OLFML2B	IDS	NA	NA	NA	NA	SULF2	NA	NA	NA	NA	NA
GATA3	CDKL3	KIAA1217	OPRL1	IDUA	NA	NA	NA	NA	SVIL	NA	NA	NA	NA	NA
GBE1	CDKL4	KIAA1324	OPTN	IFI27L2	NA	NA	NA	NA	SYPL2	NA	NA	NA	NA	NA
GBP3	CDKN1A	KIAA1522	OR4F15	IFI30	NA	NA	NA	NA	SYT11	NA	NA	NA	NA	NA
GCNT2	CDKN2A	KIAA1549	ORAI3	IFI6	NA	NA	NA	NA	TESK2	NA	NA	NA	NA	NA
GCNT4	CDKN2B	KIAA1671	OSBPL3	IGDCC4	NA	NA	NA	NA	TFPI	NA	NA	NA	NA	NA
GDF15	CDNF	KIAA2026	PAMR1	IGF2R	NA	NA	NA	NA	TGFBR3	NA	NA	NA	NA	NA
GDF6	CDYL2	KIF13B	PAQR8	IGFBP7	NA	NA	NA	NA	THOC2	NA	NA	NA	NA	NA
GDPD1	CELF2	KIF26B	PARD3	IL32	NA	NA	NA	NA	TIGD2	NA	NA	NA	NA	NA
GFPT1	CENPT	KIT	PBX3	IL6	NA	NA	NA	NA	TM2D3	NA	NA	NA	NA	NA
GGCX	CERCAM	KLF15	PDGFRA	INA	NA	NA	NA	NA	TMEM119	NA	NA	NA	NA	NA
GIPC1	CES2	KLHL24	PDK2	INHBB	NA	NA	NA	NA	TMEM140	NA	NA	NA	NA	NA
GK5	CES4A	KRT17	PEAR1	INPP5A	NA	NA	NA	NA	TMEM187	NA	NA	NA	NA	NA
GLT6D1	CFD	KRT6B	PELI2	ITGAV	NA	NA	NA	NA	TMEM26	NA	NA	NA	NA	NA
GOLGB1	CFL2	LCORL	PELI3	ITGB5	NA	NA	NA	NA	TP53TG1	NA	NA	NA	NA	NA
GOPC	CFLAR	LDB2	PER3	ITPR2	NA	NA	NA	NA	TPP1	NA	NA	NA	NA	NA
GPC1	CGREF1	LETMD1	PFKM	ITPRIPL2	NA	NA	NA	NA	TRIL	NA	NA	NA	NA	NA
GPR108	CHIC2	LIN7A	PHF21A	KCNH1	NA	NA	NA	NA	TRIM4	NA	NA	NA	NA	NA
GPR137B	CHMP4C	LITAF	PIAS1	KCNK6	NA	NA	NA	NA	TTC17	NA	NA	NA	NA	NA
GPR155	CHPF	LOC400464	PID1	KCNN2	NA	NA	NA	NA	UBE2L6	NA	NA	NA	NA	NA
GPR176	CHRDL2	LRRC15	PIM1	KCTD11	NA	NA	NA	NA	ULK2	NA	NA	NA	NA	NA
GRAMD1B	CHRNA1	LRRC32	PITPNM2	KCTD16	NA	NA	NA	NA	VAMP4	NA	NA	NA	NA	NA
GRIK2	CHST11	LTA4H	PKIG	KCTD4	NA	NA	NA	NA	VDR	NA	NA	NA	NA	NA
GRINA	CHST2	LYNX1	PLD1	KDELR3	NA	NA	NA	NA	VIT	NA	NA	NA	NA	NA
GSN	CITED2	LYPLAL1	PLEKHA4	KIAA1324	NA	NA	NA	NA	VWA5A	NA	NA	NA	NA	NA
GSTM3	CLCN5	LYRM1	PMP22	KIRREL3	NA	NA	NA	NA	WARS2	NA	NA	NA	NA	NA
GSTO1	CLCNKA	LYRM2	POLG2	KIT	NA	NA	NA	NA	WDSUB1	NA	NA	NA	NA	NA
GYG1	CLDN1	LYSMD1	POLH	KLHL36	NA	NA	NA	NA	WIPF1	NA	NA	NA	NA	NA
GYS1	CLDN16	LYST	POLR3GL	KRTAP4-2	NA	NA	NA	NA	WISP2	NA	NA	NA	NA	NA
H6PD	CLEC4G	MAF	POU6F1	KRTAP4-4	NA	NA	NA	NA	WNT11	NA	NA	NA	NA	NA
HCFC2	CLIC3	MALAT1	PPARG	L1CAM	NA	NA	NA	NA	ZBTB44	NA	NA	NA	NA	NA
HCN2	CLIC4	MAMDC2	PPARGC1A	LAMA1	NA	NA	NA	NA	ZCCHC24	NA	NA	NA	NA	NA
HDAC9	CLN5	MAN1C1	PPFIA1	LAMB2	NA	NA	NA	NA	ZCCHC7	NA	NA	NA	NA	NA
HEATR5A	CLN8	MAP3K12	PPM1D	LAMC1	NA	NA	NA	NA	ZFYVE1	NA	NA	NA	NA	NA
HECW1	CLPTM1L	MAP4K4	PPP1R3B	LAMC2	NA	NA	NA	NA	ZFYVE26	NA	NA	NA	NA	NA
HECW2	CLSTN2	MASP1	PRDM10	LAMP2	NA	NA	NA	NA	ZNF227	NA	NA	NA	NA	NA
HEXB	CLTB	MAST3	PRELP	LCE2A	NA	NA	NA	NA	ZNF232	NA	NA	NA	NA	NA
HHAT	CLTCL1	MBP	PRMT2	LCE2B	NA	NA	NA	NA	ZNF333	NA	NA	NA	NA	NA
HINT3	CMBL	MCCC1	PRSS12	LCE2C	NA	NA	NA	NA	ZNF423	NA	NA	NA	NA	NA
HIST1H2BK	CMIP	MCF2L2	PTGES	LGR4	NA	NA	NA	NA	ZNF425	NA	NA	NA	NA	NA
HIVEP1	CMKLR1	MDM2	PTGR1	LIMK2	NA	NA	NA	NA	ZNF451	NA	NA	NA	NA	NA
HIVEP2	CMPK1	MECOM	PTGS1	LIPH	NA	NA	NA	NA	ZNF467	NA	NA	NA	NA	NA
HK2	CMTM4	MED28	PTPRK	LMO7	NA	NA	NA	NA	ZNF480	NA	NA	NA	NA	NA
HLA-F	CNIH3	MEIS1	PYGL	LNPEP	NA	NA	NA	NA	ZNF512	NA	NA	NA	NA	NA
HM13	CNNM1	MEST	RAB3IL1	LOC389834	NA	NA	NA	NA	ZNF514	NA	NA	NA	NA	NA
HSD17B14	CNTN1	METTL7A	RAB9B	LOX	NA	NA	NA	NA	ZNF552	NA	NA	NA	NA	NA
HSPA4L	COBLL1	MME	RALGPS1	LOXL4	NA	NA	NA	NA	ZNF557	NA	NA	NA	NA	NA
ICAM4	COG6	MMP11	RARA	LPCAT2	NA	NA	NA	NA	ZNF585A	NA	NA	NA	NA	NA
ICAM5	COL10A1	MMP15	RASSF4	LPXN	NA	NA	NA	NA	ZNF589	NA	NA	NA	NA	NA
IDS	COL11A1	MORC2	RBM4B	LRP10	NA	NA	NA	NA	ZNF74	NA	NA	NA	NA	NA
IDUA	COL25A1	MORN4	RCOR3	LRRC17	NA	NA	NA	NA	ZRSR2	NA	NA	NA	NA	NA
IFI27L2	COL2A1	MOXD1	RERE	LRRFIP1	NA	NA	NA	NA	ZSCAN30	NA	NA	NA	NA	NA
IFI30	COL4A3BP	MPDZ	RFX5	LRRN3	NA	NA	NA	NA	NA	NA	NA	NA	NA	NA
IFI6	COL4A5	MR1	RNF169	LTBP1	NA	NA	NA	NA	NA	NA	NA	NA	NA	NA
IFIT3	COL4A6	MRGPRF	RNF213	LUZP1	NA	NA	NA	NA	NA	NA	NA	NA	NA	NA
IGDCC4	COL5A1	MRPL45	RNF214	LYSMD3	NA	NA	NA	NA	NA	NA	NA	NA	NA	NA
IGF2R	COL8A1	MRPS25	ROCK1	MACF1	NA	NA	NA	NA	NA	NA	NA	NA	NA	NA
IGFBP7	COL8A2	MSI2	ROR2	MAFF	NA	NA	NA	NA	NA	NA	NA	NA	NA	NA
IKBIP	COMP	MTHFR	RPAIN	MAMDC2	NA	NA	NA	NA	NA	NA	NA	NA	NA	NA
IL1A	COPZ2	MTHFSD	RPL28	MAN1B1	NA	NA	NA	NA	NA	NA	NA	NA	NA	NA
IL32	COQ10B	MTSS1L	RRAGC	MAN2A1	NA	NA	NA	NA	NA	NA	NA	NA	NA	NA
IL6	COX7A1	MTUS1	RTP4	MAST4	NA	NA	NA	NA	NA	NA	NA	NA	NA	NA
INA	CPE	MYO1D	RUFY1	MCFD2	NA	NA	NA	NA	NA	NA	NA	NA	NA	NA
INHBB	CPEB2	MYRIP	RUNX1T1	MCTP2	NA	NA	NA	NA	NA	NA	NA	NA	NA	NA
INPP5A	CPEB4	N4BP2L1	S100PBP	MDM2	NA	NA	NA	NA	NA	NA	NA	NA	NA	NA
IRAK2	CPNE3	NACAD	SALL2	MFAP2	NA	NA	NA	NA	NA	NA	NA	NA	NA	NA
IRAK4	CPPED1	NAPEPLD	SAP30L	MFAP5	NA	NA	NA	NA	NA	NA	NA	NA	NA	NA
ITGAV	CRAT	NDRG4	SAT2	MFSD1	NA	NA	NA	NA	NA	NA	NA	NA	NA	NA
ITGB5	CREB3	NEU1	SATB1	MFSD3	NA	NA	NA	NA	NA	NA	NA	NA	NA	NA
ITPR2	CREG1	NFAT5	SCIN	MGAT5	NA	NA	NA	NA	NA	NA	NA	NA	NA	NA
ITPRIPL2	CRELD1	NFATC4	SDCBP	MGLL	NA	NA	NA	NA	NA	NA	NA	NA	NA	NA
JAZF1	CRIP2	NFIX	SECTM1	MICA	NA	NA	NA	NA	NA	NA	NA	NA	NA	NA
KCNG1	CRNN	NFX1	SENP8	MINK1	NA	NA	NA	NA	NA	NA	NA	NA	NA	NA
KCNH1	CRTAC1	NIPAL4	SERPINF1	MLLT11	NA	NA	NA	NA	NA	NA	NA	NA	NA	NA
KCNK6	CRYL1	NKIRAS1	SERTAD4	MOGS	NA	NA	NA	NA	NA	NA	NA	NA	NA	NA
KCNN2	CSF2	NNT	SESN2	MPZL1	NA	NA	NA	NA	NA	NA	NA	NA	NA	NA
KCTD11	CSF2RB	NOL8	SETBP1	MR1	NA	NA	NA	NA	NA	NA	NA	NA	NA	NA
KCTD16	CSGALNACT1	NOV	SFRP2	MRAS	NA	NA	NA	NA	NA	NA	NA	NA	NA	NA
KCTD4	CSGALNACT2	NPEPPS	SGK1	MSRB3	NA	NA	NA	NA	NA	NA	NA	NA	NA	NA
KDELR3	CSPG5	NR2F2	SH3BP5	MTSS1	NA	NA	NA	NA	NA	NA	NA	NA	NA	NA
KIAA0355	CST1	NTN4	SHC3	MXD1	NA	NA	NA	NA	NA	NA	NA	NA	NA	NA
KIAA1324	CST2	NUMA1	SIK2	MXRA5	NA	NA	NA	NA	NA	NA	NA	NA	NA	NA
KIRREL3	CST3	NYNRIN	SLC12A8	MYO6	NA	NA	NA	NA	NA	NA	NA	NA	NA	NA
KIT	CST5	OFD1	SLC22A15	NAALADL2	NA	NA	NA	NA	NA	NA	NA	NA	NA	NA
KLHL36	CST9L	OGT	SLC2A11	NADSYN1	NA	NA	NA	NA	NA	NA	NA	NA	NA	NA
KLHL5	CTBS	OLFML2B	SLC2A12	NAPB	NA	NA	NA	NA	NA	NA	NA	NA	NA	NA
KLHL7	CTGF	OPRL1	SLC31A2	NAV1	NA	NA	NA	NA	NA	NA	NA	NA	NA	NA
KRTAP4-2	CTSD	OPTN	SLC38A4	NBEAL1	NA	NA	NA	NA	NA	NA	NA	NA	NA	NA
KRTAP4-4	CTSO	ORAI3	SLC6A6	NCF2	NA	NA	NA	NA	NA	NA	NA	NA	NA	NA
L1CAM	CTSZ	OSBPL1A	SLC9A9	NCOA3	NA	NA	NA	NA	NA	NA	NA	NA	NA	NA
LAMA1	CTTN	OSBPL3	SMARCAL1	NCOA7	NA	NA	NA	NA	NA	NA	NA	NA	NA	NA
LAMB2	CTTNBP2NL	P4HA3	SNCA	NDEL1	NA	NA	NA	NA	NA	NA	NA	NA	NA	NA
LAMC1	CUBN	PAMR1	SNED1	NDFIP2	NA	NA	NA	NA	NA	NA	NA	NA	NA	NA
LAMC2	CXADR	PAPPA	SOX30	NDUFA1	NA	NA	NA	NA	NA	NA	NA	NA	NA	NA
LAMP2	CXCL10	PARD6G	SOX4	NEDD4L	NA	NA	NA	NA	NA	NA	NA	NA	NA	NA
LCE2A	CXCR4	PBX1	SP100	NEDD9	NA	NA	NA	NA	NA	NA	NA	NA	NA	NA
LCE2B	CYB5D2	PBX3	SPATA24	NEGR1	NA	NA	NA	NA	NA	NA	NA	NA	NA	NA
LCE2C	CYB5R1	PCDHB14	SPECC1	NEO1	NA	NA	NA	NA	NA	NA	NA	NA	NA	NA
LGR4	CYBA	PDZRN3	SPSB1	NEXN	NA	NA	NA	NA	NA	NA	NA	NA	NA	NA
LHCGR	CYBRD1	PEAR1	SPTBN1	NFAT5	NA	NA	NA	NA	NA	NA	NA	NA	NA	NA
LIMK2	CYFIP2	PECR	ST14	NFE2L3	NA	NA	NA	NA	NA	NA	NA	NA	NA	NA
LIPH	CYHR1	PELI3	ST3GAL6	NFKBIZ	NA	NA	NA	NA	NA	NA	NA	NA	NA	NA
LMO7	CYP2E1	PER3	STAC	NIPAL2	NA	NA	NA	NA	NA	NA	NA	NA	NA	NA
LNPEP	CYP2S1	PEX11A	STAT2	NIPAL3	NA	NA	NA	NA	NA	NA	NA	NA	NA	NA
LOC389834	CYP2U1	PFKFB2	SULF2	NLRP10	NA	NA	NA	NA	NA	NA	NA	NA	NA	NA
LOX	CYR61	PFKM	SVIL	NMNAT2	NA	NA	NA	NA	NA	NA	NA	NA	NA	NA
LOXL3	CYS1	PGM2L1	SYNPO	NOTCH3	NA	NA	NA	NA	NA	NA	NA	NA	NA	NA
LOXL4	DAAM1	PHF21A	SYPL2	NOX4	NA	NA	NA	NA	NA	NA	NA	NA	NA	NA
LPCAT2	DACT1	PHF3	SYT11	NPAS2	NA	NA	NA	NA	NA	NA	NA	NA	NA	NA
LPXN	DAG1	PHLDA3	TACC2	NPDC1	NA	NA	NA	NA	NA	NA	NA	NA	NA	NA
LRP10	DAGLB	PHYH	TAF1A	NRBP2	NA	NA	NA	NA	NA	NA	NA	NA	NA	NA
LRRC17	DAP	PIAS1	TAF4	NRG1	NA	NA	NA	NA	NA	NA	NA	NA	NA	NA
LRRC2	DCAF6	PID1	TESK2	NTF3	NA	NA	NA	NA	NA	NA	NA	NA	NA	NA
LRRFIP1	DCLK1	PIM1	TFPI	NTM	NA	NA	NA	NA	NA	NA	NA	NA	NA	NA
LRRN3	DCTN1	PKIG	TGFB3	OGFRL1	NA	NA	NA	NA	NA	NA	NA	NA	NA	NA
LTBP1	DCTN6	PLD1	TGFBR3	OPHN1	NA	NA	NA	NA	NA	NA	NA	NA	NA	NA
LUZP1	DCUN1D3	PLEKHA4	THOC2	OPTN	NA	NA	NA	NA	NA	NA	NA	NA	NA	NA
LY96	DDA1	PLK2	TIGD2	OR5B21	NA	NA	NA	NA	NA	NA	NA	NA	NA	NA
LYSMD3	DDAH1	PLSCR4	TM2D3	OSBPL3	NA	NA	NA	NA	NA	NA	NA	NA	NA	NA
MACF1	DDR1	PLXNB2	TMEM119	OSR2	NA	NA	NA	NA	NA	NA	NA	NA	NA	NA
MAFF	DDR2	POLG2	TMEM140	OSTC	NA	NA	NA	NA	NA	NA	NA	NA	NA	NA
MAMDC2	DDRGK1	POLH	TMEM187	OSTM1	NA	NA	NA	NA	NA	NA	NA	NA	NA	NA
MAN1B1	DDX58	POLR1D	TMEM26	OTUB2	NA	NA	NA	NA	NA	NA	NA	NA	NA	NA
MAN2A1	DEDD2	POLR3GL	TNNT3	P4HA1	NA	NA	NA	NA	NA	NA	NA	NA	NA	NA
MAST4	DENND2C	POU2F2	TNS3	P4HA2	NA	NA	NA	NA	NA	NA	NA	NA	NA	NA
MCFD2	DGAT2	PPARG	TP53TG1	PAG1	NA	NA	NA	NA	NA	NA	NA	NA	NA	NA
MCTP2	DGKA	PPARGC1A	TPP1	PAMR1	NA	NA	NA	NA	NA	NA	NA	NA	NA	NA
MDM2	DGKI	PPFIA1	TRERF1	PCDHB10	NA	NA	NA	NA	NA	NA	NA	NA	NA	NA
MFAP2	DHCR7	PPIL6	TRIL	PCDHB11	NA	NA	NA	NA	NA	NA	NA	NA	NA	NA
MFAP3	DHDH	PPM1D	TRIM4	PCDHB13	NA	NA	NA	NA	NA	NA	NA	NA	NA	NA
MFAP5	DHRS1	PPP1R3B	TRIM56	PCDHB14	NA	NA	NA	NA	NA	NA	NA	NA	NA	NA
MFSD1	DHRS12	PPP1R3C	TSC2	PCDHB15	NA	NA	NA	NA	NA	NA	NA	NA	NA	NA
MFSD3	DHRS7	PRMT2	TSHZ1	PCDHB16	NA	NA	NA	NA	NA	NA	NA	NA	NA	NA
MGAT5	DHRS7B	PRSS12	TTC17	PCDHB8	NA	NA	NA	NA	NA	NA	NA	NA	NA	NA
MGLL	DIRC2	PTEN	UBE2L6	PCDHB9	NA	NA	NA	NA	NA	NA	NA	NA	NA	NA
MICA	DIXDC1	PTGES	ULK2	PCYT1A	NA	NA	NA	NA	NA	NA	NA	NA	NA	NA
MICAL2	DKK2	PTGR1	USP29	PDCD1LG2	NA	NA	NA	NA	NA	NA	NA	NA	NA	NA
MINK1	DKK3	PTGR2	USP30	PDCD4	NA	NA	NA	NA	NA	NA	NA	NA	NA	NA
MLLT11	DLL1	PTGS1	VAC14	PDLIM5	NA	NA	NA	NA	NA	NA	NA	NA	NA	NA
MMP17	DMD	PTPN13	VAMP4	PEA15	NA	NA	NA	NA	NA	NA	NA	NA	NA	NA
MMP2	DMPK	PUS3	VDR	PGM5	NA	NA	NA	NA	NA	NA	NA	NA	NA	NA
MOGS	DMRTA1	PYGL	VIT	PHLDA3	NA	NA	NA	NA	NA	NA	NA	NA	NA	NA
MPZL1	DNAH1	QPRT	VWA5A	PIK3C3	NA	NA	NA	NA	NA	NA	NA	NA	NA	NA
MR1	DNAJB4	RAB13	WARS2	PIK3IP1	NA	NA	NA	NA	NA	NA	NA	NA	NA	NA
MRAS	DNAJB6	RAB3IL1	WDR48	PITPNM3	NA	NA	NA	NA	NA	NA	NA	NA	NA	NA
MSRB3	DNAJB9	RAB8B	WDR81	PLA2G15	NA	NA	NA	NA	NA	NA	NA	NA	NA	NA
MTSS1	DNAJC1	RABEP1	WDSUB1	PLA2G16	NA	NA	NA	NA	NA	NA	NA	NA	NA	NA
MXD1	DNAJC6	RAD52	WIPF1	PLA2G4C	NA	NA	NA	NA	NA	NA	NA	NA	NA	NA
MXRA5	DNASE1L1	RARA	WISP2	PLAT	NA	NA	NA	NA	NA	NA	NA	NA	NA	NA
MYO6	DNER	RASSF4	WNT11	PLCB4	NA	NA	NA	NA	NA	NA	NA	NA	NA	NA
NAALADL2	DOCK9	RBM41	WNT2	PLEKHA1	NA	NA	NA	NA	NA	NA	NA	NA	NA	NA
NADSYN1	DOK1	RBMX2	XKR6	PLK3	NA	NA	NA	NA	NA	NA	NA	NA	NA	NA
NAPB	DOK7	RBP1	YPEL2	PLOD2	NA	NA	NA	NA	NA	NA	NA	NA	NA	NA
NAV1	DPH3	RCAN2	ZBTB4	PLXNA3	NA	NA	NA	NA	NA	NA	NA	NA	NA	NA
NBEAL1	DPP7	RCBTB1	ZBTB44	PMAIP1	NA	NA	NA	NA	NA	NA	NA	NA	NA	NA
NCF2	DRAM1	RCHY1	ZC3H10	POLD4	NA	NA	NA	NA	NA	NA	NA	NA	NA	NA
NCOA3	DRP2	RCOR3	ZCCHC24	PORCN	NA	NA	NA	NA	NA	NA	NA	NA	NA	NA
NCOA7	DSP	REL	ZCCHC7	PPFIBP1	NA	NA	NA	NA	NA	NA	NA	NA	NA	NA
NDEL1	DUSP1	REV3L	ZFP36L1	PPFIBP2	NA	NA	NA	NA	NA	NA	NA	NA	NA	NA
NDFIP2	DUSP23	RFX5	ZFYVE1	PPM1K	NA	NA	NA	NA	NA	NA	NA	NA	NA	NA
NDUFA1	DUSP3	RHOBTB3	ZFYVE26	PPP1R3C	NA	NA	NA	NA	NA	NA	NA	NA	NA	NA
NEDD4L	DUSP6	RINL	ZMIZ1	PPP2R5B	NA	NA	NA	NA	NA	NA	NA	NA	NA	NA
NEDD9	DYNC1I1	RMND1	ZNF169	PRDM1	NA	NA	NA	NA	NA	NA	NA	NA	NA	NA
NEGR1	DYNC1LI2	RNF141	ZNF2	PRDX5	NA	NA	NA	NA	NA	NA	NA	NA	NA	NA
NEK10	DYNLT3	RNF144A	ZNF227	PRDX6	NA	NA	NA	NA	NA	NA	NA	NA	NA	NA
NEO1	DYRK1B	RNF169	ZNF232	PRNP	NA	NA	NA	NA	NA	NA	NA	NA	NA	NA
NETO1	DYSF	RNF213	ZNF236	PSG1	NA	NA	NA	NA	NA	NA	NA	NA	NA	NA
NEXN	EBI3	RNF214	ZNF318	PSG2	NA	NA	NA	NA	NA	NA	NA	NA	NA	NA
NFAT5	ECM1	ROR2	ZNF333	PSG3	NA	NA	NA	NA	NA	NA	NA	NA	NA	NA
NFE2L3	EDA2R	RPAIN	ZNF341	PSTPIP2	NA	NA	NA	NA	NA	NA	NA	NA	NA	NA
NFKB1	EDEM3	RPGRIP1L	ZNF423	PTGFR	NA	NA	NA	NA	NA	NA	NA	NA	NA	NA
NFKB2	EDIL3	RPL28	ZNF425	PTGIR	NA	NA	NA	NA	NA	NA	NA	NA	NA	NA
NFKBIE	EDN1	RPL31	ZNF451	PTPN13	NA	NA	NA	NA	NA	NA	NA	NA	NA	NA
NFKBIZ	EEF1A2	RPS27L	ZNF467	PURA	NA	NA	NA	NA	NA	NA	NA	NA	NA	NA
NIPAL2	EFEMP2	RPS29	ZNF480	QPCT	NA	NA	NA	NA	NA	NA	NA	NA	NA	NA
NIPAL3	EFHD1	RPUSD4	ZNF488	QPRT	NA	NA	NA	NA	NA	NA	NA	NA	NA	NA
NKX2-6	EFNA3	RRAGB	ZNF512	RAB11FIP5	NA	NA	NA	NA	NA	NA	NA	NA	NA	NA
NLGN1	EFNA5	RRAGC	ZNF514	RAB5A	NA	NA	NA	NA	NA	NA	NA	NA	NA	NA
NLRP10	EGF	RSL1D1	ZNF552	RAI14	NA	NA	NA	NA	NA	NA	NA	NA	NA	NA
NMNAT2	EGLN1	RSRC2	ZNF557	RAPH1	NA	NA	NA	NA	NA	NA	NA	NA	NA	NA
NOTCH3	EGLN3	RUFY1	ZNF585A	RASA2	NA	NA	NA	NA	NA	NA	NA	NA	NA	NA
NOX4	EGR2	RUFY3	ZNF589	RASGRP1	NA	NA	NA	NA	NA	NA	NA	NA	NA	NA
NPAS2	EHF	RUNX1T1	ZNF618	RBM24	NA	NA	NA	NA	NA	NA	NA	NA	NA	NA
NPDC1	EIF4EBP2	RUNX2	ZNF671	RDH10	NA	NA	NA	NA	NA	NA	NA	NA	NA	NA
NRBP2	EIF5A2	S100PBP	ZNF74	RECK	NA	NA	NA	NA	NA	NA	NA	NA	NA	NA
NRG1	ELFN1	SALL2	ZNF740	REEP2	NA	NA	NA	NA	NA	NA	NA	NA	NA	NA
NTF3	ELMOD1	SAMD12	ZNF77	REN	NA	NA	NA	NA	NA	NA	NA	NA	NA	NA
NTM	EME2	SAT1	ZNF775	RFTN1	NA	NA	NA	NA	NA	NA	NA	NA	NA	NA
OGFRL1	ENC1	SAT2	ZNF785	RGS5	NA	NA	NA	NA	NA	NA	NA	NA	NA	NA
OPHN1	ENPP4	SATB1	ZRSR2	RGS9	NA	NA	NA	NA	NA	NA	NA	NA	NA	NA
OPTN	EPB41L1	SCIN	ZSCAN30	RHBDF2	NA	NA	NA	NA	NA	NA	NA	NA	NA	NA
OR2L2	EPB42	SDAD1	NA	RHOC	NA	NA	NA	NA	NA	NA	NA	NA	NA	NA
OR5B21	EPHA2	SDCBP	NA	RHOQ	NA	NA	NA	NA	NA	NA	NA	NA	NA	NA
OSBPL3	EPHA8	SENP8	NA	RIN2	NA	NA	NA	NA	NA	NA	NA	NA	NA	NA
OSR2	EPHX4	SERPINB1	NA	RIOK3	NA	NA	NA	NA	NA	NA	NA	NA	NA	NA
OSTC	EPS8L2	SERPINF1	NA	RIT1	NA	NA	NA	NA	NA	NA	NA	NA	NA	NA
OSTM1	ERLEC1	SERTAD4	NA	RNF144B	NA	NA	NA	NA	NA	NA	NA	NA	NA	NA
OTUB2	ERMAP	SESN1	NA	RNF150	NA	NA	NA	NA	NA	NA	NA	NA	NA	NA
P4HA1	ERP44	SESN2	NA	RPS27L	NA	NA	NA	NA	NA	NA	NA	NA	NA	NA
P4HA2	ERRFI1	SETBP1	NA	RRM2B	NA	NA	NA	NA	NA	NA	NA	NA	NA	NA
PAG1	ETHE1	SFRP2	NA	RSPH3	NA	NA	NA	NA	NA	NA	NA	NA	NA	NA
PAMR1	ETNK2	SGK1	NA	SAMD12	NA	NA	NA	NA	NA	NA	NA	NA	NA	NA
PARP8	ETV5	SH3BP5	NA	SAMD4A	NA	NA	NA	NA	NA	NA	NA	NA	NA	NA
PCBP4	EVC	SHC3	NA	SAMD9L	NA	NA	NA	NA	NA	NA	NA	NA	NA	NA
PCDHB10	EVI5	SIK3	NA	SAT1	NA	NA	NA	NA	NA	NA	NA	NA	NA	NA
PCDHB11	EVI5L	SIPA1L2	NA	SCD5	NA	NA	NA	NA	NA	NA	NA	NA	NA	NA
PCDHB13	EXD2	SIRT4	NA	SCN8A	NA	NA	NA	NA	NA	NA	NA	NA	NA	NA
PCDHB14	EXPH5	SLC12A8	NA	SCUBE3	NA	NA	NA	NA	NA	NA	NA	NA	NA	NA
PCDHB15	EXTL1	SLC16A4	NA	SEC14L1	NA	NA	NA	NA	NA	NA	NA	NA	NA	NA
PCDHB16	F2RL1	SLC22A15	NA	SEMA3C	NA	NA	NA	NA	NA	NA	NA	NA	NA	NA
PCDHB7	F2RL2	SLC2A11	NA	SEMA5A	NA	NA	NA	NA	NA	NA	NA	NA	NA	NA
PCDHB8	F3	SLC2A12	NA	SEMA6A	NA	NA	NA	NA	NA	NA	NA	NA	NA	NA
PCDHB9	F8	SLC38A4	NA	SEMA6D	NA	NA	NA	NA	NA	NA	NA	NA	NA	NA
PCYT1A	FABP3	SLC38A6	NA	SERINC2	NA	NA	NA	NA	NA	NA	NA	NA	NA	NA
PDCD1LG2	FADS3	SLC5A3	NA	SERINC3	NA	NA	NA	NA	NA	NA	NA	NA	NA	NA
PDCD4	FAM107A	SLC7A8	NA	SERPINA9	NA	NA	NA	NA	NA	NA	NA	NA	NA	NA
PDHB	FAM129B	SLTM	NA	SERPINB8	NA	NA	NA	NA	NA	NA	NA	NA	NA	NA
PDLIM4	FAM129C	SMAD2	NA	SERPINE1	NA	NA	NA	NA	NA	NA	NA	NA	NA	NA
PDLIM5	FAM13B	SMARCAL1	NA	SERPINE2	NA	NA	NA	NA	NA	NA	NA	NA	NA	NA
PEA15	FAM151B	SNAPC3	NA	SERTAD4	NA	NA	NA	NA	NA	NA	NA	NA	NA	NA
PGM3	FAM162A	SNCA	NA	SESN1	NA	NA	NA	NA	NA	NA	NA	NA	NA	NA
PGM5	FAM167A	SOX4	NA	SETD7	NA	NA	NA	NA	NA	NA	NA	NA	NA	NA
PHLDA2	FAM174A	SP100	NA	SFXN3	NA	NA	NA	NA	NA	NA	NA	NA	NA	NA
PHLDA3	FAM187B	SPATA18	NA	SGIP1	NA	NA	NA	NA	NA	NA	NA	NA	NA	NA
PIK3C3	FAM198B	SPATA7	NA	SGK1	NA	NA	NA	NA	NA	NA	NA	NA	NA	NA
PIK3IP1	FAM3C	SPECC1	NA	SGMS2	NA	NA	NA	NA	NA	NA	NA	NA	NA	NA
PITPNM3	FAM43A	SPG11	NA	SGTB	NA	NA	NA	NA	NA	NA	NA	NA	NA	NA
PKD2	FAM50B	SPHKAP	NA	SH3BGRL2	NA	NA	NA	NA	NA	NA	NA	NA	NA	NA
PLA2G15	FAM71F1	SPP1	NA	SH3GLB1	NA	NA	NA	NA	NA	NA	NA	NA	NA	NA
PLA2G16	FAM71F2	SSPN	NA	SH3PXD2A	NA	NA	NA	NA	NA	NA	NA	NA	NA	NA
PLA2G4C	FAM8A1	ST3GAL6	NA	SH3RF1	NA	NA	NA	NA	NA	NA	NA	NA	NA	NA
PLAT	FANK1	STAT2	NA	SH3TC2	NA	NA	NA	NA	NA	NA	NA	NA	NA	NA
PLCB4	FAP	STK4	NA	SHANK1	NA	NA	NA	NA	NA	NA	NA	NA	NA	NA
PLEKHA1	FAR2	STOM	NA	SHC3	NA	NA	NA	NA	NA	NA	NA	NA	NA	NA
PLEKHF2	FAS	STRBP	NA	SHOX2	NA	NA	NA	NA	NA	NA	NA	NA	NA	NA
PLK3	FAT1	SULF2	NA	SHROOM3	NA	NA	NA	NA	NA	NA	NA	NA	NA	NA
PLOD2	FBN1	SVIL	NA	SIL1	NA	NA	NA	NA	NA	NA	NA	NA	NA	NA
PLXNA3	FBN2	SWAP70	NA	SLC12A4	NA	NA	NA	NA	NA	NA	NA	NA	NA	NA
PMAIP1	FBXL16	SYPL2	NA	SLC17A5	NA	NA	NA	NA	NA	NA	NA	NA	NA	NA
POLD4	FBXL2	SYT11	NA	SLC1A1	NA	NA	NA	NA	NA	NA	NA	NA	NA	NA
PORCN	FBXO2	TBC1D5	NA	SLC20A2	NA	NA	NA	NA	NA	NA	NA	NA	NA	NA
PPFIBP1	FBXO9	TCEA3	NA	SLC22A18	NA	NA	NA	NA	NA	NA	NA	NA	NA	NA
PPFIBP2	FBXW4	TCEAL4	NA	SLC22A4	NA	NA	NA	NA	NA	NA	NA	NA	NA	NA
PPM1K	FCGRT	TCEAL7	NA	SLC22A5	NA	NA	NA	NA	NA	NA	NA	NA	NA	NA
PPP1R3C	FCHSD1	TESK2	NA	SLC25A20	NA	NA	NA	NA	NA	NA	NA	NA	NA	NA
PPP2R5B	FCHSD2	TFPI	NA	SLC2A13	NA	NA	NA	NA	NA	NA	NA	NA	NA	NA
PRDM1	FER1L4	TGFBR3	NA	SLC2A14	NA	NA	NA	NA	NA	NA	NA	NA	NA	NA
PRDX5	FGD4	THNSL1	NA	SLC30A4	NA	NA	NA	NA	NA	NA	NA	NA	NA	NA
PRDX6	FGF11	THOC2	NA	SLC31A2	NA	NA	NA	NA	NA	NA	NA	NA	NA	NA
PREPL	FGF2	THYN1	NA	SLC33A1	NA	NA	NA	NA	NA	NA	NA	NA	NA	NA
PRNP	FHDC1	TIGD2	NA	SLC35B3	NA	NA	NA	NA	NA	NA	NA	NA	NA	NA
PSG1	FHL2	TKT	NA	SLC35F5	NA	NA	NA	NA	NA	NA	NA	NA	NA	NA
PSG2	FHOD3	TM2D3	NA	SLC36A1	NA	NA	NA	NA	NA	NA	NA	NA	NA	NA
PSG3	FIBCD1	TMEM119	NA	SLC39A13	NA	NA	NA	NA	NA	NA	NA	NA	NA	NA
PSTPIP2	FIBIN	TMEM140	NA	SLC39A6	NA	NA	NA	NA	NA	NA	NA	NA	NA	NA
PTGFR	FILIP1L	TMEM144	NA	SLC41A2	NA	NA	NA	NA	NA	NA	NA	NA	NA	NA
PTGIR	FKBP1A	TMEM187	NA	SLC46A3	NA	NA	NA	NA	NA	NA	NA	NA	NA	NA
PTPN13	FKBP1B	TMEM217	NA	SLC7A5	NA	NA	NA	NA	NA	NA	NA	NA	NA	NA
PTX3	FKBP8	TMEM26	NA	SLC9A3R2	NA	NA	NA	NA	NA	NA	NA	NA	NA	NA
PURA	FKBP9	TMEM60	NA	SLC9A7	NA	NA	NA	NA	NA	NA	NA	NA	NA	NA
QPCT	FLNB	TMTC1	NA	SMURF2	NA	NA	NA	NA	NA	NA	NA	NA	NA	NA
QPRT	FLT1	TNFRSF10B	NA	SP100	NA	NA	NA	NA	NA	NA	NA	NA	NA	NA
RAB11FIP5	FLYWCH1	TNFRSF10D	NA	SPARC	NA	NA	NA	NA	NA	NA	NA	NA	NA	NA
RAB5A	FMN1	TOMM40L	NA	SPATA18	NA	NA	NA	NA	NA	NA	NA	NA	NA	NA
RAI14	FMOD	TOX	NA	SPOCK1	NA	NA	NA	NA	NA	NA	NA	NA	NA	NA
RANBP17	FN3K	TP53BP1	NA	SPTAN1	NA	NA	NA	NA	NA	NA	NA	NA	NA	NA
RAPH1	FNDC1	TP53INP1	NA	SRGN	NA	NA	NA	NA	NA	NA	NA	NA	NA	NA
RASA2	FNDC3B	TP53TG1	NA	SRPX2	NA	NA	NA	NA	NA	NA	NA	NA	NA	NA
RASGRP1	FNDC4	TPP1	NA	STARD4	NA	NA	NA	NA	NA	NA	NA	NA	NA	NA
RASGRP3	FOXA1	TRIL	NA	STIM1	NA	NA	NA	NA	NA	NA	NA	NA	NA	NA
RBM24	FOXE1	TRIM22	NA	STK10	NA	NA	NA	NA	NA	NA	NA	NA	NA	NA
RDH10	FOXJ1	TRIM4	NA	STX12	NA	NA	NA	NA	NA	NA	NA	NA	NA	NA
RECK	FPR3	TRIM45	NA	STX3	NA	NA	NA	NA	NA	NA	NA	NA	NA	NA
REEP2	FRMD3	TRPM7	NA	STX4	NA	NA	NA	NA	NA	NA	NA	NA	NA	NA
RELB	FRMD6	TSPAN10	NA	STXBP6	NA	NA	NA	NA	NA	NA	NA	NA	NA	NA
REN	FRY	TSPAN11	NA	SVIL	NA	NA	NA	NA	NA	NA	NA	NA	NA	NA
RFTN1	FSCN2	TSPAN6	NA	SYNGR2	NA	NA	NA	NA	NA	NA	NA	NA	NA	NA
RFTN2	FSTL3	TTC17	NA	TAF13	NA	NA	NA	NA	NA	NA	NA	NA	NA	NA
RGS5	FUCA1	TTC8	NA	TBC1D2	NA	NA	NA	NA	NA	NA	NA	NA	NA	NA
RGS9	FZD6	TUBD1	NA	TBC1D4	NA	NA	NA	NA	NA	NA	NA	NA	NA	NA
RHBDF2	GAA	UBE2L6	NA	TBC1D8B	NA	NA	NA	NA	NA	NA	NA	NA	NA	NA
RHOC	GABARAPL1	ULK2	NA	TCP11L1	NA	NA	NA	NA	NA	NA	NA	NA	NA	NA
RHOQ	GABBR2	USP32	NA	TCTA	NA	NA	NA	NA	NA	NA	NA	NA	NA	NA
RIN2	GABRD	VAMP4	NA	TEX2	NA	NA	NA	NA	NA	NA	NA	NA	NA	NA
RIOK3	GADD45A	VDR	NA	TFAP2A	NA	NA	NA	NA	NA	NA	NA	NA	NA	NA
RIT1	GADD45B	VIT	NA	TFEB	NA	NA	NA	NA	NA	NA	NA	NA	NA	NA
RNF144B	GALC	VPS13C	NA	TG	NA	NA	NA	NA	NA	NA	NA	NA	NA	NA
RNF150	GALNT10	VPS41	NA	TGFBR2	NA	NA	NA	NA	NA	NA	NA	NA	NA	NA
RPS27L	GALNT11	VPS8	NA	TGM2	NA	NA	NA	NA	NA	NA	NA	NA	NA	NA
RPS6KC1	GALNT5	VWA2	NA	THY1	NA	NA	NA	NA	NA	NA	NA	NA	NA	NA
RRM2B	GALR2	VWA5A	NA	TIAM1	NA	NA	NA	NA	NA	NA	NA	NA	NA	NA
RSPH3	GAMT	VWCE	NA	TIMP3	NA	NA	NA	NA	NA	NA	NA	NA	NA	NA
SAMD12	GAS2L2	WARS2	NA	TM6SF2	NA	NA	NA	NA	NA	NA	NA	NA	NA	NA
SAMD4A	GAS6	WBP2	NA	TMEM106A	NA	NA	NA	NA	NA	NA	NA	NA	NA	NA
SAMD9L	GATA3	WBP4	NA	TMEM117	NA	NA	NA	NA	NA	NA	NA	NA	NA	NA
SAT1	GATA6	WDFY3	NA	TMEM131	NA	NA	NA	NA	NA	NA	NA	NA	NA	NA
SATB2	GBA	WDR60	NA	TMEM136	NA	NA	NA	NA	NA	NA	NA	NA	NA	NA
SCD5	GBE1	WDSUB1	NA	TMEM150A	NA	NA	NA	NA	NA	NA	NA	NA	NA	NA
SCN8A	GCC2	WIPF1	NA	TMEM154	NA	NA	NA	NA	NA	NA	NA	NA	NA	NA
SCUBE3	GCKR	WISP2	NA	TMEM156	NA	NA	NA	NA	NA	NA	NA	NA	NA	NA
SEC14L1	GCNT2	WNT11	NA	TMEM200A	NA	NA	NA	NA	NA	NA	NA	NA	NA	NA
SEMA3C	GCNT4	WSB1	NA	TMEM217	NA	NA	NA	NA	NA	NA	NA	NA	NA	NA
SEMA5A	GDE1	XPC	NA	TMEM9B	NA	NA	NA	NA	NA	NA	NA	NA	NA	NA
SEMA6A	GDF11	ZBTB44	NA	TNFAIP1	NA	NA	NA	NA	NA	NA	NA	NA	NA	NA
SEMA6D	GDF15	ZC3H8	NA	TNFRSF10B	NA	NA	NA	NA	NA	NA	NA	NA	NA	NA
SERINC2	GDF6	ZCCHC24	NA	TNFRSF10D	NA	NA	NA	NA	NA	NA	NA	NA	NA	NA
SERINC3	GDI1	ZCCHC7	NA	TNFSF18	NA	NA	NA	NA	NA	NA	NA	NA	NA	NA
SERPINA9	GDNF	ZEB1	NA	TNFSF4	NA	NA	NA	NA	NA	NA	NA	NA	NA	NA
SERPINB8	GDPD1	ZFP64	NA	TNIP1	NA	NA	NA	NA	NA	NA	NA	NA	NA	NA
SERPINE1	GDPD5	ZFP90	NA	TOB1	NA	NA	NA	NA	NA	NA	NA	NA	NA	NA
SERPINE2	GFOD1	ZFYVE1	NA	TP53INP1	NA	NA	NA	NA	NA	NA	NA	NA	NA	NA
SERTAD4	GFPT1	ZFYVE26	NA	TPBG	NA	NA	NA	NA	NA	NA	NA	NA	NA	NA
SESN1	GHR	ZMAT3	NA	TPM1	NA	NA	NA	NA	NA	NA	NA	NA	NA	NA
SESN2	GIPC1	ZMYM5	NA	TPRG1L	NA	NA	NA	NA	NA	NA	NA	NA	NA	NA
SETD7	GJA5	ZNF135	NA	TRAK1	NA	NA	NA	NA	NA	NA	NA	NA	NA	NA
SFXN3	GJB2	ZNF154	NA	TRAK2	NA	NA	NA	NA	NA	NA	NA	NA	NA	NA
SGCZ	GK5	ZNF16	NA	TRIM22	NA	NA	NA	NA	NA	NA	NA	NA	NA	NA
SGIP1	GLB1	ZNF197	NA	TRIML2	NA	NA	NA	NA	NA	NA	NA	NA	NA	NA
SGK1	GLIPR1	ZNF211	NA	TRPC1	NA	NA	NA	NA	NA	NA	NA	NA	NA	NA
SGMS2	GLRX	ZNF227	NA	TRPC4	NA	NA	NA	NA	NA	NA	NA	NA	NA	NA
SGTB	GLS	ZNF232	NA	TRPM4	NA	NA	NA	NA	NA	NA	NA	NA	NA	NA
SH3BGRL2	GLTP	ZNF277	NA	TRPV2	NA	NA	NA	NA	NA	NA	NA	NA	NA	NA
SH3GLB1	GMIP	ZNF285	NA	TSPAN13	NA	NA	NA	NA	NA	NA	NA	NA	NA	NA
SH3PXD2A	GNAI2	ZNF30	NA	TSPAN14	NA	NA	NA	NA	NA	NA	NA	NA	NA	NA
SH3RF1	GNPTAB	ZNF333	NA	TSPAN9	NA	NA	NA	NA	NA	NA	NA	NA	NA	NA
SH3TC2	GNPTG	ZNF33A	NA	TTC3	NA	NA	NA	NA	NA	NA	NA	NA	NA	NA
SHANK1	GOLGB1	ZNF345	NA	TUBB2A	NA	NA	NA	NA	NA	NA	NA	NA	NA	NA
SHC3	GPLD1	ZNF354B	NA	UBL3	NA	NA	NA	NA	NA	NA	NA	NA	NA	NA
SHOX2	GPR1	ZNF37A	NA	UCHL1	NA	NA	NA	NA	NA	NA	NA	NA	NA	NA
SHROOM3	GPR107	ZNF382	NA	UFM1	NA	NA	NA	NA	NA	NA	NA	NA	NA	NA
SIL1	GPR108	ZNF397	NA	ULBP1	NA	NA	NA	NA	NA	NA	NA	NA	NA	NA
SIPA1L3	GPR132	ZNF419	NA	UNC13B	NA	NA	NA	NA	NA	NA	NA	NA	NA	NA
SLC12A4	GPR137	ZNF423	NA	USP53	NA	NA	NA	NA	NA	NA	NA	NA	NA	NA
SLC16A12	GPR137B	ZNF425	NA	VAMP2	NA	NA	NA	NA	NA	NA	NA	NA	NA	NA
SLC16A4	GPR146	ZNF451	NA	VAT1	NA	NA	NA	NA	NA	NA	NA	NA	NA	NA
SLC17A5	GPR151	ZNF467	NA	VGLL3	NA	NA	NA	NA	NA	NA	NA	NA	NA	NA
SLC1A1	GPR155	ZNF480	NA	WDR26	NA	NA	NA	NA	NA	NA	NA	NA	NA	NA
SLC20A2	GPR157	ZNF512	NA	WDR41	NA	NA	NA	NA	NA	NA	NA	NA	NA	NA
SLC22A18	GPR35	ZNF514	NA	WDR63	NA	NA	NA	NA	NA	NA	NA	NA	NA	NA
SLC22A4	GPR52	ZNF549	NA	WDR66	NA	NA	NA	NA	NA	NA	NA	NA	NA	NA
SLC22A5	GPR6	ZNF552	NA	WIPI1	NA	NA	NA	NA	NA	NA	NA	NA	NA	NA
SLC25A20	GPX3	ZNF557	NA	WNT16	NA	NA	NA	NA	NA	NA	NA	NA	NA	NA
SLC2A13	GRAMD1B	ZNF585A	NA	WNT5A	NA	NA	NA	NA	NA	NA	NA	NA	NA	NA
SLC2A14	GRB2	ZNF589	NA	WNT5B	NA	NA	NA	NA	NA	NA	NA	NA	NA	NA
SLC30A4	GREB1L	ZNF608	NA	XDH	NA	NA	NA	NA	NA	NA	NA	NA	NA	NA
SLC31A2	GRK4	ZNF610	NA	YPEL2	NA	NA	NA	NA	NA	NA	NA	NA	NA	NA
SLC33A1	GRN	ZNF616	NA	ZBTB46	NA	NA	NA	NA	NA	NA	NA	NA	NA	NA
SLC35B3	GSN	ZNF74	NA	ZDHHC24	NA	NA	NA	NA	NA	NA	NA	NA	NA	NA
SLC35F5	GSTM3	ZNF79	NA	ZFHX2	NA	NA	NA	NA	NA	NA	NA	NA	NA	NA
SLC36A1	GSTO1	ZNF879	NA	ZMAT3	NA	NA	NA	NA	NA	NA	NA	NA	NA	NA
SLC39A13	GUK1	ZRSR2	NA	ZNF264	NA	NA	NA	NA	NA	NA	NA	NA	NA	NA
SLC39A6	GYS1	ZSCAN21	NA	ZNF432	NA	NA	NA	NA	NA	NA	NA	NA	NA	NA
SLC41A2	H6PD	ZSCAN30	NA	ZNF583	NA	NA	NA	NA	NA	NA	NA	NA	NA	NA
SLC46A3	HAGH	NA	NA	ZNF622	NA	NA	NA	NA	NA	NA	NA	NA	NA	NA
SLC7A5	HAGHL	NA	NA	ZNF654	NA	NA	NA	NA	NA	NA	NA	NA	NA	NA
SLC9A1	HAPLN1	NA	NA	ZNFX1	NA	NA	NA	NA	NA	NA	NA	NA	NA	NA
SLC9A3R2	HAS1	NA	NA	NA	NA	NA	NA	NA	NA	NA	NA	NA	NA	NA
SLC9A7	HBEGF	NA	NA	NA	NA	NA	NA	NA	NA	NA	NA	NA	NA	NA
SLFN12	HCCS	NA	NA	NA	NA	NA	NA	NA	NA	NA	NA	NA	NA	NA
SMURF2	HCN2	NA	NA	NA	NA	NA	NA	NA	NA	NA	NA	NA	NA	NA
SP100	HCN3	NA	NA	NA	NA	NA	NA	NA	NA	NA	NA	NA	NA	NA
SPARC	HCST	NA	NA	NA	NA	NA	NA	NA	NA	NA	NA	NA	NA	NA
SPATA18	HDAC11	NA	NA	NA	NA	NA	NA	NA	NA	NA	NA	NA	NA	NA
SPOCK1	HDAC9	NA	NA	NA	NA	NA	NA	NA	NA	NA	NA	NA	NA	NA
SPRED1	HEATR5A	NA	NA	NA	NA	NA	NA	NA	NA	NA	NA	NA	NA	NA
SPTAN1	HEATR5B	NA	NA	NA	NA	NA	NA	NA	NA	NA	NA	NA	NA	NA
SQLE	HECW1	NA	NA	NA	NA	NA	NA	NA	NA	NA	NA	NA	NA	NA
SRGN	HECW2	NA	NA	NA	NA	NA	NA	NA	NA	NA	NA	NA	NA	NA
SRPX2	HERPUD1	NA	NA	NA	NA	NA	NA	NA	NA	NA	NA	NA	NA	NA
SSTR1	HES3	NA	NA	NA	NA	NA	NA	NA	NA	NA	NA	NA	NA	NA
STARD4	HES4	NA	NA	NA	NA	NA	NA	NA	NA	NA	NA	NA	NA	NA
STIM1	HEXB	NA	NA	NA	NA	NA	NA	NA	NA	NA	NA	NA	NA	NA
STK10	HGSNAT	NA	NA	NA	NA	NA	NA	NA	NA	NA	NA	NA	NA	NA
STX12	HHAT	NA	NA	NA	NA	NA	NA	NA	NA	NA	NA	NA	NA	NA
STX3	HHIP	NA	NA	NA	NA	NA	NA	NA	NA	NA	NA	NA	NA	NA
STX4	HIF1A	NA	NA	NA	NA	NA	NA	NA	NA	NA	NA	NA	NA	NA
STX6	HINT3	NA	NA	NA	NA	NA	NA	NA	NA	NA	NA	NA	NA	NA
STXBP6	HIPK3	NA	NA	NA	NA	NA	NA	NA	NA	NA	NA	NA	NA	NA
SVIL	HIST1H1T	NA	NA	NA	NA	NA	NA	NA	NA	NA	NA	NA	NA	NA
SYNGR2	HIST1H2BK	NA	NA	NA	NA	NA	NA	NA	NA	NA	NA	NA	NA	NA
SYT1	HIST2H2BE	NA	NA	NA	NA	NA	NA	NA	NA	NA	NA	NA	NA	NA
TAC3	HIVEP1	NA	NA	NA	NA	NA	NA	NA	NA	NA	NA	NA	NA	NA
TAF13	HIVEP2	NA	NA	NA	NA	NA	NA	NA	NA	NA	NA	NA	NA	NA
TBC1D2	HK2	NA	NA	NA	NA	NA	NA	NA	NA	NA	NA	NA	NA	NA
TBC1D4	HLA-DPA1	NA	NA	NA	NA	NA	NA	NA	NA	NA	NA	NA	NA	NA
TBC1D8B	HLA-DPB1	NA	NA	NA	NA	NA	NA	NA	NA	NA	NA	NA	NA	NA
TCP11L1	HLA-F	NA	NA	NA	NA	NA	NA	NA	NA	NA	NA	NA	NA	NA
TCTA	HM13	NA	NA	NA	NA	NA	NA	NA	NA	NA	NA	NA	NA	NA
TDG	HNF4A	NA	NA	NA	NA	NA	NA	NA	NA	NA	NA	NA	NA	NA
TEX2	HOXB5	NA	NA	NA	NA	NA	NA	NA	NA	NA	NA	NA	NA	NA
TFAP2A	HSD17B14	NA	NA	NA	NA	NA	NA	NA	NA	NA	NA	NA	NA	NA
TFEB	HSD17B2	NA	NA	NA	NA	NA	NA	NA	NA	NA	NA	NA	NA	NA
TG	HSD3B7	NA	NA	NA	NA	NA	NA	NA	NA	NA	NA	NA	NA	NA
TGFBR2	HSPB6	NA	NA	NA	NA	NA	NA	NA	NA	NA	NA	NA	NA	NA
TGM2	HSPB8	NA	NA	NA	NA	NA	NA	NA	NA	NA	NA	NA	NA	NA
THY1	HSPG2	NA	NA	NA	NA	NA	NA	NA	NA	NA	NA	NA	NA	NA
TIAM1	HTR1D	NA	NA	NA	NA	NA	NA	NA	NA	NA	NA	NA	NA	NA
TIMP3	HTR1E	NA	NA	NA	NA	NA	NA	NA	NA	NA	NA	NA	NA	NA
TLR6	ICAM1	NA	NA	NA	NA	NA	NA	NA	NA	NA	NA	NA	NA	NA
TM6SF1	ICAM4	NA	NA	NA	NA	NA	NA	NA	NA	NA	NA	NA	NA	NA
TM6SF2	ICAM5	NA	NA	NA	NA	NA	NA	NA	NA	NA	NA	NA	NA	NA
TMEM106A	IDS	NA	NA	NA	NA	NA	NA	NA	NA	NA	NA	NA	NA	NA
TMEM117	IDUA	NA	NA	NA	NA	NA	NA	NA	NA	NA	NA	NA	NA	NA
TMEM130	IER3	NA	NA	NA	NA	NA	NA	NA	NA	NA	NA	NA	NA	NA
TMEM131	IFI27L2	NA	NA	NA	NA	NA	NA	NA	NA	NA	NA	NA	NA	NA
TMEM132A	IFI30	NA	NA	NA	NA	NA	NA	NA	NA	NA	NA	NA	NA	NA
TMEM136	IFI6	NA	NA	NA	NA	NA	NA	NA	NA	NA	NA	NA	NA	NA
TMEM150A	IFNGR1	NA	NA	NA	NA	NA	NA	NA	NA	NA	NA	NA	NA	NA
TMEM154	IFNGR2	NA	NA	NA	NA	NA	NA	NA	NA	NA	NA	NA	NA	NA
TMEM156	IGDCC4	NA	NA	NA	NA	NA	NA	NA	NA	NA	NA	NA	NA	NA
TMEM167A	IGF1R	NA	NA	NA	NA	NA	NA	NA	NA	NA	NA	NA	NA	NA
TMEM200A	IGF2R	NA	NA	NA	NA	NA	NA	NA	NA	NA	NA	NA	NA	NA
TMEM217	IGFBP3	NA	NA	NA	NA	NA	NA	NA	NA	NA	NA	NA	NA	NA
TMEM9B	IGFBP7	NA	NA	NA	NA	NA	NA	NA	NA	NA	NA	NA	NA	NA
TNFAIP1	IL10RB	NA	NA	NA	NA	NA	NA	NA	NA	NA	NA	NA	NA	NA
TNFAIP3	IL13	NA	NA	NA	NA	NA	NA	NA	NA	NA	NA	NA	NA	NA
TNFRSF10B	IL1RAP	NA	NA	NA	NA	NA	NA	NA	NA	NA	NA	NA	NA	NA
TNFRSF10D	IL32	NA	NA	NA	NA	NA	NA	NA	NA	NA	NA	NA	NA	NA
TNFRSF9	IL6	NA	NA	NA	NA	NA	NA	NA	NA	NA	NA	NA	NA	NA
TNFSF18	INA	NA	NA	NA	NA	NA	NA	NA	NA	NA	NA	NA	NA	NA
TNFSF4	INF2	NA	NA	NA	NA	NA	NA	NA	NA	NA	NA	NA	NA	NA
TNIP1	INHBA	NA	NA	NA	NA	NA	NA	NA	NA	NA	NA	NA	NA	NA
TOB1	INHBB	NA	NA	NA	NA	NA	NA	NA	NA	NA	NA	NA	NA	NA
TOX2	INPP5A	NA	NA	NA	NA	NA	NA	NA	NA	NA	NA	NA	NA	NA
TP53INP1	INSC	NA	NA	NA	NA	NA	NA	NA	NA	NA	NA	NA	NA	NA
TPBG	INSIG2	NA	NA	NA	NA	NA	NA	NA	NA	NA	NA	NA	NA	NA
TPM1	INTU	NA	NA	NA	NA	NA	NA	NA	NA	NA	NA	NA	NA	NA
TPRG1L	IQSEC3	NA	NA	NA	NA	NA	NA	NA	NA	NA	NA	NA	NA	NA
TRAF1	IRS2	NA	NA	NA	NA	NA	NA	NA	NA	NA	NA	NA	NA	NA
TRAF4	ISCU	NA	NA	NA	NA	NA	NA	NA	NA	NA	NA	NA	NA	NA
TRAK1	ISG15	NA	NA	NA	NA	NA	NA	NA	NA	NA	NA	NA	NA	NA
TRAK2	ISM2	NA	NA	NA	NA	NA	NA	NA	NA	NA	NA	NA	NA	NA
TRIM22	ITFG1	NA	NA	NA	NA	NA	NA	NA	NA	NA	NA	NA	NA	NA
TRIM55	ITGA11	NA	NA	NA	NA	NA	NA	NA	NA	NA	NA	NA	NA	NA
TRIML2	ITGA3	NA	NA	NA	NA	NA	NA	NA	NA	NA	NA	NA	NA	NA
TRPC1	ITGAV	NA	NA	NA	NA	NA	NA	NA	NA	NA	NA	NA	NA	NA
TRPC4	ITGB5	NA	NA	NA	NA	NA	NA	NA	NA	NA	NA	NA	NA	NA
TRPM4	ITGB6	NA	NA	NA	NA	NA	NA	NA	NA	NA	NA	NA	NA	NA
TRPV2	ITGBL1	NA	NA	NA	NA	NA	NA	NA	NA	NA	NA	NA	NA	NA
TSPAN13	ITM2B	NA	NA	NA	NA	NA	NA	NA	NA	NA	NA	NA	NA	NA
TSPAN14	ITPR2	NA	NA	NA	NA	NA	NA	NA	NA	NA	NA	NA	NA	NA
TSPAN9	ITPRIPL2	NA	NA	NA	NA	NA	NA	NA	NA	NA	NA	NA	NA	NA
TSPYL6	IVL	NA	NA	NA	NA	NA	NA	NA	NA	NA	NA	NA	NA	NA
TTC3	JAG2	NA	NA	NA	NA	NA	NA	NA	NA	NA	NA	NA	NA	NA
TUBB2A	JKAMP	NA	NA	NA	NA	NA	NA	NA	NA	NA	NA	NA	NA	NA
TUBB2B	JPH2	NA	NA	NA	NA	NA	NA	NA	NA	NA	NA	NA	NA	NA
UBL3	JUP	NA	NA	NA	NA	NA	NA	NA	NA	NA	NA	NA	NA	NA
UCHL1	KATNAL1	NA	NA	NA	NA	NA	NA	NA	NA	NA	NA	NA	NA	NA
UFM1	KCNA10	NA	NA	NA	NA	NA	NA	NA	NA	NA	NA	NA	NA	NA
ULBP1	KCNAB2	NA	NA	NA	NA	NA	NA	NA	NA	NA	NA	NA	NA	NA
UNC13B	KCNC4	NA	NA	NA	NA	NA	NA	NA	NA	NA	NA	NA	NA	NA
USP53	KCNH1	NA	NA	NA	NA	NA	NA	NA	NA	NA	NA	NA	NA	NA
VAMP2	KCNH4	NA	NA	NA	NA	NA	NA	NA	NA	NA	NA	NA	NA	NA
VAT1	KCNH6	NA	NA	NA	NA	NA	NA	NA	NA	NA	NA	NA	NA	NA
VEPH1	KCNJ10	NA	NA	NA	NA	NA	NA	NA	NA	NA	NA	NA	NA	NA
VGLL3	KCNJ2	NA	NA	NA	NA	NA	NA	NA	NA	NA	NA	NA	NA	NA
WDR26	KCNK12	NA	NA	NA	NA	NA	NA	NA	NA	NA	NA	NA	NA	NA
WDR41	KCNK6	NA	NA	NA	NA	NA	NA	NA	NA	NA	NA	NA	NA	NA
WDR63	KCNMB4	NA	NA	NA	NA	NA	NA	NA	NA	NA	NA	NA	NA	NA
WDR66	KCNN2	NA	NA	NA	NA	NA	NA	NA	NA	NA	NA	NA	NA	NA
WIPI1	KCNQ3	NA	NA	NA	NA	NA	NA	NA	NA	NA	NA	NA	NA	NA
WNT16	KCTD11	NA	NA	NA	NA	NA	NA	NA	NA	NA	NA	NA	NA	NA
WNT5A	KCTD16	NA	NA	NA	NA	NA	NA	NA	NA	NA	NA	NA	NA	NA
WNT5B	KCTD20	NA	NA	NA	NA	NA	NA	NA	NA	NA	NA	NA	NA	NA
XDH	KCTD4	NA	NA	NA	NA	NA	NA	NA	NA	NA	NA	NA	NA	NA
YPEL2	KCTD9	NA	NA	NA	NA	NA	NA	NA	NA	NA	NA	NA	NA	NA
ZBTB46	KDELR3	NA	NA	NA	NA	NA	NA	NA	NA	NA	NA	NA	NA	NA
ZC3HAV1L	KDM4B	NA	NA	NA	NA	NA	NA	NA	NA	NA	NA	NA	NA	NA
ZDHHC24	KDM4C	NA	NA	NA	NA	NA	NA	NA	NA	NA	NA	NA	NA	NA
ZDHHC5	KIAA0319L	NA	NA	NA	NA	NA	NA	NA	NA	NA	NA	NA	NA	NA
ZFC3H1	KIAA1191	NA	NA	NA	NA	NA	NA	NA	NA	NA	NA	NA	NA	NA
ZFHX2	KIAA1324	NA	NA	NA	NA	NA	NA	NA	NA	NA	NA	NA	NA	NA
ZMAT3	KIF1C	NA	NA	NA	NA	NA	NA	NA	NA	NA	NA	NA	NA	NA
ZNF264	KIF26B	NA	NA	NA	NA	NA	NA	NA	NA	NA	NA	NA	NA	NA
ZNF432	KIF5A	NA	NA	NA	NA	NA	NA	NA	NA	NA	NA	NA	NA	NA
ZNF583	KIFC2	NA	NA	NA	NA	NA	NA	NA	NA	NA	NA	NA	NA	NA
ZNF622	KIRREL3	NA	NA	NA	NA	NA	NA	NA	NA	NA	NA	NA	NA	NA
ZNF654	KISS1	NA	NA	NA	NA	NA	NA	NA	NA	NA	NA	NA	NA	NA
ZNF699	KIT	NA	NA	NA	NA	NA	NA	NA	NA	NA	NA	NA	NA	NA
ZNF805	KL	NA	NA	NA	NA	NA	NA	NA	NA	NA	NA	NA	NA	NA
ZNF841	KLC1	NA	NA	NA	NA	NA	NA	NA	NA	NA	NA	NA	NA	NA
ZNFX1	KLF11	NA	NA	NA	NA	NA	NA	NA	NA	NA	NA	NA	NA	NA
ZSWIM4	KLF14	NA	NA	NA	NA	NA	NA	NA	NA	NA	NA	NA	NA	NA
NA	KLF7	NA	NA	NA	NA	NA	NA	NA	NA	NA	NA	NA	NA	NA
NA	KLF8	NA	NA	NA	NA	NA	NA	NA	NA	NA	NA	NA	NA	NA
NA	KLHDC1	NA	NA	NA	NA	NA	NA	NA	NA	NA	NA	NA	NA	NA
NA	KLHL24	NA	NA	NA	NA	NA	NA	NA	NA	NA	NA	NA	NA	NA
NA	KLHL3	NA	NA	NA	NA	NA	NA	NA	NA	NA	NA	NA	NA	NA
NA	KLHL30	NA	NA	NA	NA	NA	NA	NA	NA	NA	NA	NA	NA	NA
NA	KLHL35	NA	NA	NA	NA	NA	NA	NA	NA	NA	NA	NA	NA	NA
NA	KLHL36	NA	NA	NA	NA	NA	NA	NA	NA	NA	NA	NA	NA	NA
NA	KRT15	NA	NA	NA	NA	NA	NA	NA	NA	NA	NA	NA	NA	NA
NA	KRT17	NA	NA	NA	NA	NA	NA	NA	NA	NA	NA	NA	NA	NA
NA	KRT18	NA	NA	NA	NA	NA	NA	NA	NA	NA	NA	NA	NA	NA
NA	KRT8	NA	NA	NA	NA	NA	NA	NA	NA	NA	NA	NA	NA	NA
NA	KRTAP4-2	NA	NA	NA	NA	NA	NA	NA	NA	NA	NA	NA	NA	NA
NA	KRTAP4-4	NA	NA	NA	NA	NA	NA	NA	NA	NA	NA	NA	NA	NA
NA	KRTAP5-7	NA	NA	NA	NA	NA	NA	NA	NA	NA	NA	NA	NA	NA
NA	KRTAP5-8	NA	NA	NA	NA	NA	NA	NA	NA	NA	NA	NA	NA	NA
NA	L1CAM	NA	NA	NA	NA	NA	NA	NA	NA	NA	NA	NA	NA	NA
NA	LAMA1	NA	NA	NA	NA	NA	NA	NA	NA	NA	NA	NA	NA	NA
NA	LAMB1	NA	NA	NA	NA	NA	NA	NA	NA	NA	NA	NA	NA	NA
NA	LAMB2	NA	NA	NA	NA	NA	NA	NA	NA	NA	NA	NA	NA	NA
NA	LAMC1	NA	NA	NA	NA	NA	NA	NA	NA	NA	NA	NA	NA	NA
NA	LAMC2	NA	NA	NA	NA	NA	NA	NA	NA	NA	NA	NA	NA	NA
NA	LAMP2	NA	NA	NA	NA	NA	NA	NA	NA	NA	NA	NA	NA	NA
NA	LATS2	NA	NA	NA	NA	NA	NA	NA	NA	NA	NA	NA	NA	NA
NA	LCE2A	NA	NA	NA	NA	NA	NA	NA	NA	NA	NA	NA	NA	NA
NA	LCE2B	NA	NA	NA	NA	NA	NA	NA	NA	NA	NA	NA	NA	NA
NA	LCE2C	NA	NA	NA	NA	NA	NA	NA	NA	NA	NA	NA	NA	NA
NA	LCE2D	NA	NA	NA	NA	NA	NA	NA	NA	NA	NA	NA	NA	NA
NA	LCE3B	NA	NA	NA	NA	NA	NA	NA	NA	NA	NA	NA	NA	NA
NA	LCN1	NA	NA	NA	NA	NA	NA	NA	NA	NA	NA	NA	NA	NA
NA	LDOC1	NA	NA	NA	NA	NA	NA	NA	NA	NA	NA	NA	NA	NA
NA	LEP	NA	NA	NA	NA	NA	NA	NA	NA	NA	NA	NA	NA	NA
NA	LGMN	NA	NA	NA	NA	NA	NA	NA	NA	NA	NA	NA	NA	NA
NA	LGR4	NA	NA	NA	NA	NA	NA	NA	NA	NA	NA	NA	NA	NA
NA	LILRA5	NA	NA	NA	NA	NA	NA	NA	NA	NA	NA	NA	NA	NA
NA	LIMCH1	NA	NA	NA	NA	NA	NA	NA	NA	NA	NA	NA	NA	NA
NA	LIMK2	NA	NA	NA	NA	NA	NA	NA	NA	NA	NA	NA	NA	NA
NA	LIMS1	NA	NA	NA	NA	NA	NA	NA	NA	NA	NA	NA	NA	NA
NA	LIMS2	NA	NA	NA	NA	NA	NA	NA	NA	NA	NA	NA	NA	NA
NA	LIN7B	NA	NA	NA	NA	NA	NA	NA	NA	NA	NA	NA	NA	NA
NA	LINGO3	NA	NA	NA	NA	NA	NA	NA	NA	NA	NA	NA	NA	NA
NA	LIPG	NA	NA	NA	NA	NA	NA	NA	NA	NA	NA	NA	NA	NA
NA	LIPH	NA	NA	NA	NA	NA	NA	NA	NA	NA	NA	NA	NA	NA
NA	LMBRD1	NA	NA	NA	NA	NA	NA	NA	NA	NA	NA	NA	NA	NA
NA	LMBRD2	NA	NA	NA	NA	NA	NA	NA	NA	NA	NA	NA	NA	NA
NA	LMF1	NA	NA	NA	NA	NA	NA	NA	NA	NA	NA	NA	NA	NA
NA	LMLN	NA	NA	NA	NA	NA	NA	NA	NA	NA	NA	NA	NA	NA
NA	LMO7	NA	NA	NA	NA	NA	NA	NA	NA	NA	NA	NA	NA	NA
NA	LNPEP	NA	NA	NA	NA	NA	NA	NA	NA	NA	NA	NA	NA	NA
NA	LOC389834	NA	NA	NA	NA	NA	NA	NA	NA	NA	NA	NA	NA	NA
NA	LOX	NA	NA	NA	NA	NA	NA	NA	NA	NA	NA	NA	NA	NA
NA	LOXL4	NA	NA	NA	NA	NA	NA	NA	NA	NA	NA	NA	NA	NA
NA	LPCAT2	NA	NA	NA	NA	NA	NA	NA	NA	NA	NA	NA	NA	NA
NA	LPXN	NA	NA	NA	NA	NA	NA	NA	NA	NA	NA	NA	NA	NA
NA	LRP10	NA	NA	NA	NA	NA	NA	NA	NA	NA	NA	NA	NA	NA
NA	LRP12	NA	NA	NA	NA	NA	NA	NA	NA	NA	NA	NA	NA	NA
NA	LRRC1	NA	NA	NA	NA	NA	NA	NA	NA	NA	NA	NA	NA	NA
NA	LRRC17	NA	NA	NA	NA	NA	NA	NA	NA	NA	NA	NA	NA	NA
NA	LRRFIP1	NA	NA	NA	NA	NA	NA	NA	NA	NA	NA	NA	NA	NA
NA	LRRN3	NA	NA	NA	NA	NA	NA	NA	NA	NA	NA	NA	NA	NA
NA	LTBP1	NA	NA	NA	NA	NA	NA	NA	NA	NA	NA	NA	NA	NA
NA	LTBP3	NA	NA	NA	NA	NA	NA	NA	NA	NA	NA	NA	NA	NA
NA	LUZP1	NA	NA	NA	NA	NA	NA	NA	NA	NA	NA	NA	NA	NA
NA	LY6H	NA	NA	NA	NA	NA	NA	NA	NA	NA	NA	NA	NA	NA
NA	LYN	NA	NA	NA	NA	NA	NA	NA	NA	NA	NA	NA	NA	NA
NA	LYNX1	NA	NA	NA	NA	NA	NA	NA	NA	NA	NA	NA	NA	NA
NA	LYPD2	NA	NA	NA	NA	NA	NA	NA	NA	NA	NA	NA	NA	NA
NA	LYSMD3	NA	NA	NA	NA	NA	NA	NA	NA	NA	NA	NA	NA	NA
NA	MAB21L1	NA	NA	NA	NA	NA	NA	NA	NA	NA	NA	NA	NA	NA
NA	MACF1	NA	NA	NA	NA	NA	NA	NA	NA	NA	NA	NA	NA	NA
NA	MAFF	NA	NA	NA	NA	NA	NA	NA	NA	NA	NA	NA	NA	NA
NA	MAFK	NA	NA	NA	NA	NA	NA	NA	NA	NA	NA	NA	NA	NA
NA	MAGI1	NA	NA	NA	NA	NA	NA	NA	NA	NA	NA	NA	NA	NA
NA	MAMDC2	NA	NA	NA	NA	NA	NA	NA	NA	NA	NA	NA	NA	NA
NA	MAML3	NA	NA	NA	NA	NA	NA	NA	NA	NA	NA	NA	NA	NA
NA	MAN1B1	NA	NA	NA	NA	NA	NA	NA	NA	NA	NA	NA	NA	NA
NA	MAN2A1	NA	NA	NA	NA	NA	NA	NA	NA	NA	NA	NA	NA	NA
NA	MAN2B2	NA	NA	NA	NA	NA	NA	NA	NA	NA	NA	NA	NA	NA
NA	MANBA	NA	NA	NA	NA	NA	NA	NA	NA	NA	NA	NA	NA	NA
NA	MAP1LC3A	NA	NA	NA	NA	NA	NA	NA	NA	NA	NA	NA	NA	NA
NA	MAP3K10	NA	NA	NA	NA	NA	NA	NA	NA	NA	NA	NA	NA	NA
NA	MAP3K13	NA	NA	NA	NA	NA	NA	NA	NA	NA	NA	NA	NA	NA
NA	MAP4K3	NA	NA	NA	NA	NA	NA	NA	NA	NA	NA	NA	NA	NA
NA	MAP6	NA	NA	NA	NA	NA	NA	NA	NA	NA	NA	NA	NA	NA
NA	MAPK11	NA	NA	NA	NA	NA	NA	NA	NA	NA	NA	NA	NA	NA
NA	MAPK12	NA	NA	NA	NA	NA	NA	NA	NA	NA	NA	NA	NA	NA
NA	MAPK3	NA	NA	NA	NA	NA	NA	NA	NA	NA	NA	NA	NA	NA
NA	MAPK8IP3	NA	NA	NA	NA	NA	NA	NA	NA	NA	NA	NA	NA	NA
NA	MAPRE2	NA	NA	NA	NA	NA	NA	NA	NA	NA	NA	NA	NA	NA
NA	MAPRE3	NA	NA	NA	NA	NA	NA	NA	NA	NA	NA	NA	NA	NA
NA	MARK4	NA	NA	NA	NA	NA	NA	NA	NA	NA	NA	NA	NA	NA
NA	MAST4	NA	NA	NA	NA	NA	NA	NA	NA	NA	NA	NA	NA	NA
NA	MBOAT7	NA	NA	NA	NA	NA	NA	NA	NA	NA	NA	NA	NA	NA
NA	MCFD2	NA	NA	NA	NA	NA	NA	NA	NA	NA	NA	NA	NA	NA
NA	MCOLN1	NA	NA	NA	NA	NA	NA	NA	NA	NA	NA	NA	NA	NA
NA	MCTP2	NA	NA	NA	NA	NA	NA	NA	NA	NA	NA	NA	NA	NA
NA	MDM2	NA	NA	NA	NA	NA	NA	NA	NA	NA	NA	NA	NA	NA
NA	MEGF6	NA	NA	NA	NA	NA	NA	NA	NA	NA	NA	NA	NA	NA
NA	MFAP2	NA	NA	NA	NA	NA	NA	NA	NA	NA	NA	NA	NA	NA
NA	MFAP3L	NA	NA	NA	NA	NA	NA	NA	NA	NA	NA	NA	NA	NA
NA	MFAP5	NA	NA	NA	NA	NA	NA	NA	NA	NA	NA	NA	NA	NA
NA	MFGE8	NA	NA	NA	NA	NA	NA	NA	NA	NA	NA	NA	NA	NA
NA	MFSD1	NA	NA	NA	NA	NA	NA	NA	NA	NA	NA	NA	NA	NA
NA	MFSD3	NA	NA	NA	NA	NA	NA	NA	NA	NA	NA	NA	NA	NA
NA	MGAT5	NA	NA	NA	NA	NA	NA	NA	NA	NA	NA	NA	NA	NA
NA	MGLL	NA	NA	NA	NA	NA	NA	NA	NA	NA	NA	NA	NA	NA
NA	MGP	NA	NA	NA	NA	NA	NA	NA	NA	NA	NA	NA	NA	NA
NA	MGST2	NA	NA	NA	NA	NA	NA	NA	NA	NA	NA	NA	NA	NA
NA	MICA	NA	NA	NA	NA	NA	NA	NA	NA	NA	NA	NA	NA	NA
NA	MICALCL	NA	NA	NA	NA	NA	NA	NA	NA	NA	NA	NA	NA	NA
NA	MINK1	NA	NA	NA	NA	NA	NA	NA	NA	NA	NA	NA	NA	NA
NA	MLKL	NA	NA	NA	NA	NA	NA	NA	NA	NA	NA	NA	NA	NA
NA	MLLT11	NA	NA	NA	NA	NA	NA	NA	NA	NA	NA	NA	NA	NA
NA	MMP10	NA	NA	NA	NA	NA	NA	NA	NA	NA	NA	NA	NA	NA
NA	MMP12	NA	NA	NA	NA	NA	NA	NA	NA	NA	NA	NA	NA	NA
NA	MMP24	NA	NA	NA	NA	NA	NA	NA	NA	NA	NA	NA	NA	NA
NA	MMP3	NA	NA	NA	NA	NA	NA	NA	NA	NA	NA	NA	NA	NA
NA	MMP9	NA	NA	NA	NA	NA	NA	NA	NA	NA	NA	NA	NA	NA
NA	MOAP1	NA	NA	NA	NA	NA	NA	NA	NA	NA	NA	NA	NA	NA
NA	MOG	NA	NA	NA	NA	NA	NA	NA	NA	NA	NA	NA	NA	NA
NA	MOGS	NA	NA	NA	NA	NA	NA	NA	NA	NA	NA	NA	NA	NA
NA	MORC4	NA	NA	NA	NA	NA	NA	NA	NA	NA	NA	NA	NA	NA
NA	MPP2	NA	NA	NA	NA	NA	NA	NA	NA	NA	NA	NA	NA	NA
NA	MPP4	NA	NA	NA	NA	NA	NA	NA	NA	NA	NA	NA	NA	NA
NA	MPZL1	NA	NA	NA	NA	NA	NA	NA	NA	NA	NA	NA	NA	NA
NA	MPZL3	NA	NA	NA	NA	NA	NA	NA	NA	NA	NA	NA	NA	NA
NA	MR1	NA	NA	NA	NA	NA	NA	NA	NA	NA	NA	NA	NA	NA
NA	MRAS	NA	NA	NA	NA	NA	NA	NA	NA	NA	NA	NA	NA	NA
NA	MRC2	NA	NA	NA	NA	NA	NA	NA	NA	NA	NA	NA	NA	NA
NA	MRGPRX1	NA	NA	NA	NA	NA	NA	NA	NA	NA	NA	NA	NA	NA
NA	MRGPRX3	NA	NA	NA	NA	NA	NA	NA	NA	NA	NA	NA	NA	NA
NA	MRGPRX4	NA	NA	NA	NA	NA	NA	NA	NA	NA	NA	NA	NA	NA
NA	MRS2	NA	NA	NA	NA	NA	NA	NA	NA	NA	NA	NA	NA	NA
NA	MSI2	NA	NA	NA	NA	NA	NA	NA	NA	NA	NA	NA	NA	NA
NA	MSRB3	NA	NA	NA	NA	NA	NA	NA	NA	NA	NA	NA	NA	NA
NA	MT1X	NA	NA	NA	NA	NA	NA	NA	NA	NA	NA	NA	NA	NA
NA	MTNR1B	NA	NA	NA	NA	NA	NA	NA	NA	NA	NA	NA	NA	NA
NA	MTSS1	NA	NA	NA	NA	NA	NA	NA	NA	NA	NA	NA	NA	NA
NA	MUC1	NA	NA	NA	NA	NA	NA	NA	NA	NA	NA	NA	NA	NA
NA	MUC20	NA	NA	NA	NA	NA	NA	NA	NA	NA	NA	NA	NA	NA
NA	MVP	NA	NA	NA	NA	NA	NA	NA	NA	NA	NA	NA	NA	NA
NA	MXD1	NA	NA	NA	NA	NA	NA	NA	NA	NA	NA	NA	NA	NA
NA	MXI1	NA	NA	NA	NA	NA	NA	NA	NA	NA	NA	NA	NA	NA
NA	MXRA5	NA	NA	NA	NA	NA	NA	NA	NA	NA	NA	NA	NA	NA
NA	MXRA7	NA	NA	NA	NA	NA	NA	NA	NA	NA	NA	NA	NA	NA
NA	MYCT1	NA	NA	NA	NA	NA	NA	NA	NA	NA	NA	NA	NA	NA
NA	MYL12A	NA	NA	NA	NA	NA	NA	NA	NA	NA	NA	NA	NA	NA
NA	MYO1D	NA	NA	NA	NA	NA	NA	NA	NA	NA	NA	NA	NA	NA
NA	MYO1E	NA	NA	NA	NA	NA	NA	NA	NA	NA	NA	NA	NA	NA
NA	MYO6	NA	NA	NA	NA	NA	NA	NA	NA	NA	NA	NA	NA	NA
NA	MYOZ1	NA	NA	NA	NA	NA	NA	NA	NA	NA	NA	NA	NA	NA
NA	MYOZ2	NA	NA	NA	NA	NA	NA	NA	NA	NA	NA	NA	NA	NA
NA	NAAA	NA	NA	NA	NA	NA	NA	NA	NA	NA	NA	NA	NA	NA
NA	NAALADL2	NA	NA	NA	NA	NA	NA	NA	NA	NA	NA	NA	NA	NA
NA	NADSYN1	NA	NA	NA	NA	NA	NA	NA	NA	NA	NA	NA	NA	NA
NA	NALCN	NA	NA	NA	NA	NA	NA	NA	NA	NA	NA	NA	NA	NA
NA	NAP1L3	NA	NA	NA	NA	NA	NA	NA	NA	NA	NA	NA	NA	NA
NA	NAP1L5	NA	NA	NA	NA	NA	NA	NA	NA	NA	NA	NA	NA	NA
NA	NAPB	NA	NA	NA	NA	NA	NA	NA	NA	NA	NA	NA	NA	NA
NA	NAV1	NA	NA	NA	NA	NA	NA	NA	NA	NA	NA	NA	NA	NA
NA	NBEAL1	NA	NA	NA	NA	NA	NA	NA	NA	NA	NA	NA	NA	NA
NA	NCF2	NA	NA	NA	NA	NA	NA	NA	NA	NA	NA	NA	NA	NA
NA	NCKAP5L	NA	NA	NA	NA	NA	NA	NA	NA	NA	NA	NA	NA	NA
NA	NCOA3	NA	NA	NA	NA	NA	NA	NA	NA	NA	NA	NA	NA	NA
NA	NCOA7	NA	NA	NA	NA	NA	NA	NA	NA	NA	NA	NA	NA	NA
NA	NDEL1	NA	NA	NA	NA	NA	NA	NA	NA	NA	NA	NA	NA	NA
NA	NDFIP1	NA	NA	NA	NA	NA	NA	NA	NA	NA	NA	NA	NA	NA
NA	NDFIP2	NA	NA	NA	NA	NA	NA	NA	NA	NA	NA	NA	NA	NA
NA	NDST1	NA	NA	NA	NA	NA	NA	NA	NA	NA	NA	NA	NA	NA
NA	NDUFA1	NA	NA	NA	NA	NA	NA	NA	NA	NA	NA	NA	NA	NA
NA	NDUFC1	NA	NA	NA	NA	NA	NA	NA	NA	NA	NA	NA	NA	NA
NA	NEDD4L	NA	NA	NA	NA	NA	NA	NA	NA	NA	NA	NA	NA	NA
NA	NEDD9	NA	NA	NA	NA	NA	NA	NA	NA	NA	NA	NA	NA	NA
NA	NEGR1	NA	NA	NA	NA	NA	NA	NA	NA	NA	NA	NA	NA	NA
NA	NEO1	NA	NA	NA	NA	NA	NA	NA	NA	NA	NA	NA	NA	NA
NA	NEURL3	NA	NA	NA	NA	NA	NA	NA	NA	NA	NA	NA	NA	NA
NA	NEXN	NA	NA	NA	NA	NA	NA	NA	NA	NA	NA	NA	NA	NA
NA	NFAT5	NA	NA	NA	NA	NA	NA	NA	NA	NA	NA	NA	NA	NA
NA	NFE2L1	NA	NA	NA	NA	NA	NA	NA	NA	NA	NA	NA	NA	NA
NA	NFE2L3	NA	NA	NA	NA	NA	NA	NA	NA	NA	NA	NA	NA	NA
NA	NFKBIZ	NA	NA	NA	NA	NA	NA	NA	NA	NA	NA	NA	NA	NA
NA	NIPAL1	NA	NA	NA	NA	NA	NA	NA	NA	NA	NA	NA	NA	NA
NA	NIPAL2	NA	NA	NA	NA	NA	NA	NA	NA	NA	NA	NA	NA	NA
NA	NIPAL3	NA	NA	NA	NA	NA	NA	NA	NA	NA	NA	NA	NA	NA
NA	NIPSNAP3A	NA	NA	NA	NA	NA	NA	NA	NA	NA	NA	NA	NA	NA
NA	NKIRAS2	NA	NA	NA	NA	NA	NA	NA	NA	NA	NA	NA	NA	NA
NA	NKX2-5	NA	NA	NA	NA	NA	NA	NA	NA	NA	NA	NA	NA	NA
NA	NKX3-1	NA	NA	NA	NA	NA	NA	NA	NA	NA	NA	NA	NA	NA
NA	NLRP10	NA	NA	NA	NA	NA	NA	NA	NA	NA	NA	NA	NA	NA
NA	NLRP6	NA	NA	NA	NA	NA	NA	NA	NA	NA	NA	NA	NA	NA
NA	NLRX1	NA	NA	NA	NA	NA	NA	NA	NA	NA	NA	NA	NA	NA
NA	NME3	NA	NA	NA	NA	NA	NA	NA	NA	NA	NA	NA	NA	NA
NA	NMNAT2	NA	NA	NA	NA	NA	NA	NA	NA	NA	NA	NA	NA	NA
NA	NOG	NA	NA	NA	NA	NA	NA	NA	NA	NA	NA	NA	NA	NA
NA	NOS1AP	NA	NA	NA	NA	NA	NA	NA	NA	NA	NA	NA	NA	NA
NA	NOSTRIN	NA	NA	NA	NA	NA	NA	NA	NA	NA	NA	NA	NA	NA
NA	NOTCH3	NA	NA	NA	NA	NA	NA	NA	NA	NA	NA	NA	NA	NA
NA	NOX1	NA	NA	NA	NA	NA	NA	NA	NA	NA	NA	NA	NA	NA
NA	NOX4	NA	NA	NA	NA	NA	NA	NA	NA	NA	NA	NA	NA	NA
NA	NOXA1	NA	NA	NA	NA	NA	NA	NA	NA	NA	NA	NA	NA	NA
NA	NPAS1	NA	NA	NA	NA	NA	NA	NA	NA	NA	NA	NA	NA	NA
NA	NPAS2	NA	NA	NA	NA	NA	NA	NA	NA	NA	NA	NA	NA	NA
NA	NPC1L1	NA	NA	NA	NA	NA	NA	NA	NA	NA	NA	NA	NA	NA
NA	NPDC1	NA	NA	NA	NA	NA	NA	NA	NA	NA	NA	NA	NA	NA
NA	NPL	NA	NA	NA	NA	NA	NA	NA	NA	NA	NA	NA	NA	NA
NA	NPPB	NA	NA	NA	NA	NA	NA	NA	NA	NA	NA	NA	NA	NA
NA	NPPC	NA	NA	NA	NA	NA	NA	NA	NA	NA	NA	NA	NA	NA
NA	NPR2	NA	NA	NA	NA	NA	NA	NA	NA	NA	NA	NA	NA	NA
NA	NR1H2	NA	NA	NA	NA	NA	NA	NA	NA	NA	NA	NA	NA	NA
NA	NRBP2	NA	NA	NA	NA	NA	NA	NA	NA	NA	NA	NA	NA	NA
NA	NRG1	NA	NA	NA	NA	NA	NA	NA	NA	NA	NA	NA	NA	NA
NA	NSF	NA	NA	NA	NA	NA	NA	NA	NA	NA	NA	NA	NA	NA
NA	NT5C2	NA	NA	NA	NA	NA	NA	NA	NA	NA	NA	NA	NA	NA
NA	NT5DC1	NA	NA	NA	NA	NA	NA	NA	NA	NA	NA	NA	NA	NA
NA	NTF3	NA	NA	NA	NA	NA	NA	NA	NA	NA	NA	NA	NA	NA
NA	NTM	NA	NA	NA	NA	NA	NA	NA	NA	NA	NA	NA	NA	NA
NA	NTNG2	NA	NA	NA	NA	NA	NA	NA	NA	NA	NA	NA	NA	NA
NA	NUAK1	NA	NA	NA	NA	NA	NA	NA	NA	NA	NA	NA	NA	NA
NA	NUDT18	NA	NA	NA	NA	NA	NA	NA	NA	NA	NA	NA	NA	NA
NA	NUDT22	NA	NA	NA	NA	NA	NA	NA	NA	NA	NA	NA	NA	NA
NA	NUMB	NA	NA	NA	NA	NA	NA	NA	NA	NA	NA	NA	NA	NA
NA	NXF3	NA	NA	NA	NA	NA	NA	NA	NA	NA	NA	NA	NA	NA
NA	NXPH3	NA	NA	NA	NA	NA	NA	NA	NA	NA	NA	NA	NA	NA
NA	NXPH4	NA	NA	NA	NA	NA	NA	NA	NA	NA	NA	NA	NA	NA
NA	OGFRL1	NA	NA	NA	NA	NA	NA	NA	NA	NA	NA	NA	NA	NA
NA	OPCML	NA	NA	NA	NA	NA	NA	NA	NA	NA	NA	NA	NA	NA
NA	OPHN1	NA	NA	NA	NA	NA	NA	NA	NA	NA	NA	NA	NA	NA
NA	OPRD1	NA	NA	NA	NA	NA	NA	NA	NA	NA	NA	NA	NA	NA
NA	OPRL1	NA	NA	NA	NA	NA	NA	NA	NA	NA	NA	NA	NA	NA
NA	OPTN	NA	NA	NA	NA	NA	NA	NA	NA	NA	NA	NA	NA	NA
NA	OR10A3	NA	NA	NA	NA	NA	NA	NA	NA	NA	NA	NA	NA	NA
NA	OR10Q1	NA	NA	NA	NA	NA	NA	NA	NA	NA	NA	NA	NA	NA
NA	OR1D2	NA	NA	NA	NA	NA	NA	NA	NA	NA	NA	NA	NA	NA
NA	OR1F1	NA	NA	NA	NA	NA	NA	NA	NA	NA	NA	NA	NA	NA
NA	OR1J4	NA	NA	NA	NA	NA	NA	NA	NA	NA	NA	NA	NA	NA
NA	OR1L8	NA	NA	NA	NA	NA	NA	NA	NA	NA	NA	NA	NA	NA
NA	OR1N2	NA	NA	NA	NA	NA	NA	NA	NA	NA	NA	NA	NA	NA
NA	OR1Q1	NA	NA	NA	NA	NA	NA	NA	NA	NA	NA	NA	NA	NA
NA	OR51E1	NA	NA	NA	NA	NA	NA	NA	NA	NA	NA	NA	NA	NA
NA	OR51M1	NA	NA	NA	NA	NA	NA	NA	NA	NA	NA	NA	NA	NA
NA	OR56A5	NA	NA	NA	NA	NA	NA	NA	NA	NA	NA	NA	NA	NA
NA	OR5B21	NA	NA	NA	NA	NA	NA	NA	NA	NA	NA	NA	NA	NA
NA	OR5P2	NA	NA	NA	NA	NA	NA	NA	NA	NA	NA	NA	NA	NA
NA	OR5P3	NA	NA	NA	NA	NA	NA	NA	NA	NA	NA	NA	NA	NA
NA	ORAI3	NA	NA	NA	NA	NA	NA	NA	NA	NA	NA	NA	NA	NA
NA	ORMDL3	NA	NA	NA	NA	NA	NA	NA	NA	NA	NA	NA	NA	NA
NA	OSBPL3	NA	NA	NA	NA	NA	NA	NA	NA	NA	NA	NA	NA	NA
NA	OSM	NA	NA	NA	NA	NA	NA	NA	NA	NA	NA	NA	NA	NA
NA	OSR2	NA	NA	NA	NA	NA	NA	NA	NA	NA	NA	NA	NA	NA
NA	OSTC	NA	NA	NA	NA	NA	NA	NA	NA	NA	NA	NA	NA	NA
NA	OSTM1	NA	NA	NA	NA	NA	NA	NA	NA	NA	NA	NA	NA	NA
NA	OTUB2	NA	NA	NA	NA	NA	NA	NA	NA	NA	NA	NA	NA	NA
NA	OVCH2	NA	NA	NA	NA	NA	NA	NA	NA	NA	NA	NA	NA	NA
NA	OVGP1	NA	NA	NA	NA	NA	NA	NA	NA	NA	NA	NA	NA	NA
NA	OXTR	NA	NA	NA	NA	NA	NA	NA	NA	NA	NA	NA	NA	NA
NA	P4HA1	NA	NA	NA	NA	NA	NA	NA	NA	NA	NA	NA	NA	NA
NA	P4HA2	NA	NA	NA	NA	NA	NA	NA	NA	NA	NA	NA	NA	NA
NA	P4HB	NA	NA	NA	NA	NA	NA	NA	NA	NA	NA	NA	NA	NA
NA	PACS1	NA	NA	NA	NA	NA	NA	NA	NA	NA	NA	NA	NA	NA
NA	PACS2	NA	NA	NA	NA	NA	NA	NA	NA	NA	NA	NA	NA	NA
NA	PAG1	NA	NA	NA	NA	NA	NA	NA	NA	NA	NA	NA	NA	NA
NA	PALMD	NA	NA	NA	NA	NA	NA	NA	NA	NA	NA	NA	NA	NA
NA	PAM	NA	NA	NA	NA	NA	NA	NA	NA	NA	NA	NA	NA	NA
NA	PAMR1	NA	NA	NA	NA	NA	NA	NA	NA	NA	NA	NA	NA	NA
NA	PAPPA	NA	NA	NA	NA	NA	NA	NA	NA	NA	NA	NA	NA	NA
NA	PAPPA2	NA	NA	NA	NA	NA	NA	NA	NA	NA	NA	NA	NA	NA
NA	PAPSS2	NA	NA	NA	NA	NA	NA	NA	NA	NA	NA	NA	NA	NA
NA	PAQR7	NA	NA	NA	NA	NA	NA	NA	NA	NA	NA	NA	NA	NA
NA	PARD6G	NA	NA	NA	NA	NA	NA	NA	NA	NA	NA	NA	NA	NA
NA	PAWR	NA	NA	NA	NA	NA	NA	NA	NA	NA	NA	NA	NA	NA
NA	PBLD	NA	NA	NA	NA	NA	NA	NA	NA	NA	NA	NA	NA	NA
NA	PBXIP1	NA	NA	NA	NA	NA	NA	NA	NA	NA	NA	NA	NA	NA
NA	PCBD1	NA	NA	NA	NA	NA	NA	NA	NA	NA	NA	NA	NA	NA
NA	PCDH1	NA	NA	NA	NA	NA	NA	NA	NA	NA	NA	NA	NA	NA
NA	PCDHA10	NA	NA	NA	NA	NA	NA	NA	NA	NA	NA	NA	NA	NA
NA	PCDHA13	NA	NA	NA	NA	NA	NA	NA	NA	NA	NA	NA	NA	NA
NA	PCDHA3	NA	NA	NA	NA	NA	NA	NA	NA	NA	NA	NA	NA	NA
NA	PCDHA4	NA	NA	NA	NA	NA	NA	NA	NA	NA	NA	NA	NA	NA
NA	PCDHA7	NA	NA	NA	NA	NA	NA	NA	NA	NA	NA	NA	NA	NA
NA	PCDHB10	NA	NA	NA	NA	NA	NA	NA	NA	NA	NA	NA	NA	NA
NA	PCDHB11	NA	NA	NA	NA	NA	NA	NA	NA	NA	NA	NA	NA	NA
NA	PCDHB12	NA	NA	NA	NA	NA	NA	NA	NA	NA	NA	NA	NA	NA
NA	PCDHB13	NA	NA	NA	NA	NA	NA	NA	NA	NA	NA	NA	NA	NA
NA	PCDHB14	NA	NA	NA	NA	NA	NA	NA	NA	NA	NA	NA	NA	NA
NA	PCDHB15	NA	NA	NA	NA	NA	NA	NA	NA	NA	NA	NA	NA	NA
NA	PCDHB16	NA	NA	NA	NA	NA	NA	NA	NA	NA	NA	NA	NA	NA
NA	PCDHB2	NA	NA	NA	NA	NA	NA	NA	NA	NA	NA	NA	NA	NA
NA	PCDHB5	NA	NA	NA	NA	NA	NA	NA	NA	NA	NA	NA	NA	NA
NA	PCDHB6	NA	NA	NA	NA	NA	NA	NA	NA	NA	NA	NA	NA	NA
NA	PCDHB8	NA	NA	NA	NA	NA	NA	NA	NA	NA	NA	NA	NA	NA
NA	PCDHB9	NA	NA	NA	NA	NA	NA	NA	NA	NA	NA	NA	NA	NA
NA	PCMTD1	NA	NA	NA	NA	NA	NA	NA	NA	NA	NA	NA	NA	NA
NA	PCSK5	NA	NA	NA	NA	NA	NA	NA	NA	NA	NA	NA	NA	NA
NA	PCSK7	NA	NA	NA	NA	NA	NA	NA	NA	NA	NA	NA	NA	NA
NA	PCYOX1	NA	NA	NA	NA	NA	NA	NA	NA	NA	NA	NA	NA	NA
NA	PCYT1A	NA	NA	NA	NA	NA	NA	NA	NA	NA	NA	NA	NA	NA
NA	PDCD1LG2	NA	NA	NA	NA	NA	NA	NA	NA	NA	NA	NA	NA	NA
NA	PDCD4	NA	NA	NA	NA	NA	NA	NA	NA	NA	NA	NA	NA	NA
NA	PDE11A	NA	NA	NA	NA	NA	NA	NA	NA	NA	NA	NA	NA	NA
NA	PDE1C	NA	NA	NA	NA	NA	NA	NA	NA	NA	NA	NA	NA	NA
NA	PDE8B	NA	NA	NA	NA	NA	NA	NA	NA	NA	NA	NA	NA	NA
NA	PDGFB	NA	NA	NA	NA	NA	NA	NA	NA	NA	NA	NA	NA	NA
NA	PDK4	NA	NA	NA	NA	NA	NA	NA	NA	NA	NA	NA	NA	NA
NA	PDLIM2	NA	NA	NA	NA	NA	NA	NA	NA	NA	NA	NA	NA	NA
NA	PDLIM5	NA	NA	NA	NA	NA	NA	NA	NA	NA	NA	NA	NA	NA
NA	PDZD7	NA	NA	NA	NA	NA	NA	NA	NA	NA	NA	NA	NA	NA
NA	PEA15	NA	NA	NA	NA	NA	NA	NA	NA	NA	NA	NA	NA	NA
NA	PEBP4	NA	NA	NA	NA	NA	NA	NA	NA	NA	NA	NA	NA	NA
NA	PERP	NA	NA	NA	NA	NA	NA	NA	NA	NA	NA	NA	NA	NA
NA	PFKFB2	NA	NA	NA	NA	NA	NA	NA	NA	NA	NA	NA	NA	NA
NA	PFKFB3	NA	NA	NA	NA	NA	NA	NA	NA	NA	NA	NA	NA	NA
NA	PFKFB4	NA	NA	NA	NA	NA	NA	NA	NA	NA	NA	NA	NA	NA
NA	PGC	NA	NA	NA	NA	NA	NA	NA	NA	NA	NA	NA	NA	NA
NA	PGM2L1	NA	NA	NA	NA	NA	NA	NA	NA	NA	NA	NA	NA	NA
NA	PGM5	NA	NA	NA	NA	NA	NA	NA	NA	NA	NA	NA	NA	NA
NA	PGRMC1	NA	NA	NA	NA	NA	NA	NA	NA	NA	NA	NA	NA	NA
NA	PGRMC2	NA	NA	NA	NA	NA	NA	NA	NA	NA	NA	NA	NA	NA
NA	PHACTR2	NA	NA	NA	NA	NA	NA	NA	NA	NA	NA	NA	NA	NA
NA	PHEX	NA	NA	NA	NA	NA	NA	NA	NA	NA	NA	NA	NA	NA
NA	PHKA1	NA	NA	NA	NA	NA	NA	NA	NA	NA	NA	NA	NA	NA
NA	PHLDA3	NA	NA	NA	NA	NA	NA	NA	NA	NA	NA	NA	NA	NA
NA	PHLDB1	NA	NA	NA	NA	NA	NA	NA	NA	NA	NA	NA	NA	NA
NA	PHLDB3	NA	NA	NA	NA	NA	NA	NA	NA	NA	NA	NA	NA	NA
NA	PI16	NA	NA	NA	NA	NA	NA	NA	NA	NA	NA	NA	NA	NA
NA	PI3	NA	NA	NA	NA	NA	NA	NA	NA	NA	NA	NA	NA	NA
NA	PICALM	NA	NA	NA	NA	NA	NA	NA	NA	NA	NA	NA	NA	NA
NA	PIGV	NA	NA	NA	NA	NA	NA	NA	NA	NA	NA	NA	NA	NA
NA	PIGZ	NA	NA	NA	NA	NA	NA	NA	NA	NA	NA	NA	NA	NA
NA	PIK3AP1	NA	NA	NA	NA	NA	NA	NA	NA	NA	NA	NA	NA	NA
NA	PIK3C3	NA	NA	NA	NA	NA	NA	NA	NA	NA	NA	NA	NA	NA
NA	PIK3CA	NA	NA	NA	NA	NA	NA	NA	NA	NA	NA	NA	NA	NA
NA	PIK3IP1	NA	NA	NA	NA	NA	NA	NA	NA	NA	NA	NA	NA	NA
NA	PIP4K2C	NA	NA	NA	NA	NA	NA	NA	NA	NA	NA	NA	NA	NA
NA	PIP5KL1	NA	NA	NA	NA	NA	NA	NA	NA	NA	NA	NA	NA	NA
NA	PITPNM3	NA	NA	NA	NA	NA	NA	NA	NA	NA	NA	NA	NA	NA
NA	PKP2	NA	NA	NA	NA	NA	NA	NA	NA	NA	NA	NA	NA	NA
NA	PLA2G15	NA	NA	NA	NA	NA	NA	NA	NA	NA	NA	NA	NA	NA
NA	PLA2G16	NA	NA	NA	NA	NA	NA	NA	NA	NA	NA	NA	NA	NA
NA	PLA2G4C	NA	NA	NA	NA	NA	NA	NA	NA	NA	NA	NA	NA	NA
NA	PLA2R1	NA	NA	NA	NA	NA	NA	NA	NA	NA	NA	NA	NA	NA
NA	PLAT	NA	NA	NA	NA	NA	NA	NA	NA	NA	NA	NA	NA	NA
NA	PLBD2	NA	NA	NA	NA	NA	NA	NA	NA	NA	NA	NA	NA	NA
NA	PLCB4	NA	NA	NA	NA	NA	NA	NA	NA	NA	NA	NA	NA	NA
NA	PLCE1	NA	NA	NA	NA	NA	NA	NA	NA	NA	NA	NA	NA	NA
NA	PLD3	NA	NA	NA	NA	NA	NA	NA	NA	NA	NA	NA	NA	NA
NA	PLEKHA1	NA	NA	NA	NA	NA	NA	NA	NA	NA	NA	NA	NA	NA
NA	PLEKHB2	NA	NA	NA	NA	NA	NA	NA	NA	NA	NA	NA	NA	NA
NA	PLK3	NA	NA	NA	NA	NA	NA	NA	NA	NA	NA	NA	NA	NA
NA	PLOD1	NA	NA	NA	NA	NA	NA	NA	NA	NA	NA	NA	NA	NA
NA	PLOD2	NA	NA	NA	NA	NA	NA	NA	NA	NA	NA	NA	NA	NA
NA	PLSCR4	NA	NA	NA	NA	NA	NA	NA	NA	NA	NA	NA	NA	NA
NA	PLXDC2	NA	NA	NA	NA	NA	NA	NA	NA	NA	NA	NA	NA	NA
NA	PLXNA1	NA	NA	NA	NA	NA	NA	NA	NA	NA	NA	NA	NA	NA
NA	PLXNA2	NA	NA	NA	NA	NA	NA	NA	NA	NA	NA	NA	NA	NA
NA	PLXNA3	NA	NA	NA	NA	NA	NA	NA	NA	NA	NA	NA	NA	NA
NA	PLXNB3	NA	NA	NA	NA	NA	NA	NA	NA	NA	NA	NA	NA	NA
NA	PLXND1	NA	NA	NA	NA	NA	NA	NA	NA	NA	NA	NA	NA	NA
NA	PMAIP1	NA	NA	NA	NA	NA	NA	NA	NA	NA	NA	NA	NA	NA
NA	PMEPA1	NA	NA	NA	NA	NA	NA	NA	NA	NA	NA	NA	NA	NA
NA	PNPLA2	NA	NA	NA	NA	NA	NA	NA	NA	NA	NA	NA	NA	NA
NA	PNRC1	NA	NA	NA	NA	NA	NA	NA	NA	NA	NA	NA	NA	NA
NA	POLD4	NA	NA	NA	NA	NA	NA	NA	NA	NA	NA	NA	NA	NA
NA	POLH	NA	NA	NA	NA	NA	NA	NA	NA	NA	NA	NA	NA	NA
NA	POMT1	NA	NA	NA	NA	NA	NA	NA	NA	NA	NA	NA	NA	NA
NA	PON2	NA	NA	NA	NA	NA	NA	NA	NA	NA	NA	NA	NA	NA
NA	PORCN	NA	NA	NA	NA	NA	NA	NA	NA	NA	NA	NA	NA	NA
NA	POU2F2	NA	NA	NA	NA	NA	NA	NA	NA	NA	NA	NA	NA	NA
NA	PPFIA1	NA	NA	NA	NA	NA	NA	NA	NA	NA	NA	NA	NA	NA
NA	PPFIA4	NA	NA	NA	NA	NA	NA	NA	NA	NA	NA	NA	NA	NA
NA	PPFIBP1	NA	NA	NA	NA	NA	NA	NA	NA	NA	NA	NA	NA	NA
NA	PPFIBP2	NA	NA	NA	NA	NA	NA	NA	NA	NA	NA	NA	NA	NA
NA	PPIC	NA	NA	NA	NA	NA	NA	NA	NA	NA	NA	NA	NA	NA
NA	PPM1K	NA	NA	NA	NA	NA	NA	NA	NA	NA	NA	NA	NA	NA
NA	PPME1	NA	NA	NA	NA	NA	NA	NA	NA	NA	NA	NA	NA	NA
NA	PPP1R13L	NA	NA	NA	NA	NA	NA	NA	NA	NA	NA	NA	NA	NA
NA	PPP1R14A	NA	NA	NA	NA	NA	NA	NA	NA	NA	NA	NA	NA	NA
NA	PPP1R16A	NA	NA	NA	NA	NA	NA	NA	NA	NA	NA	NA	NA	NA
NA	PPP1R2	NA	NA	NA	NA	NA	NA	NA	NA	NA	NA	NA	NA	NA
NA	PPP1R3C	NA	NA	NA	NA	NA	NA	NA	NA	NA	NA	NA	NA	NA
NA	PPP2R5B	NA	NA	NA	NA	NA	NA	NA	NA	NA	NA	NA	NA	NA
NA	PPP3CC	NA	NA	NA	NA	NA	NA	NA	NA	NA	NA	NA	NA	NA
NA	PPP4R4	NA	NA	NA	NA	NA	NA	NA	NA	NA	NA	NA	NA	NA
NA	PPP6R2	NA	NA	NA	NA	NA	NA	NA	NA	NA	NA	NA	NA	NA
NA	PRAF2	NA	NA	NA	NA	NA	NA	NA	NA	NA	NA	NA	NA	NA
NA	PRDM1	NA	NA	NA	NA	NA	NA	NA	NA	NA	NA	NA	NA	NA
NA	PRDX4	NA	NA	NA	NA	NA	NA	NA	NA	NA	NA	NA	NA	NA
NA	PRDX5	NA	NA	NA	NA	NA	NA	NA	NA	NA	NA	NA	NA	NA
NA	PRDX6	NA	NA	NA	NA	NA	NA	NA	NA	NA	NA	NA	NA	NA
NA	PRICKLE1	NA	NA	NA	NA	NA	NA	NA	NA	NA	NA	NA	NA	NA
NA	PRICKLE2	NA	NA	NA	NA	NA	NA	NA	NA	NA	NA	NA	NA	NA
NA	PRKAB2	NA	NA	NA	NA	NA	NA	NA	NA	NA	NA	NA	NA	NA
NA	PRKCH	NA	NA	NA	NA	NA	NA	NA	NA	NA	NA	NA	NA	NA
NA	PRLH	NA	NA	NA	NA	NA	NA	NA	NA	NA	NA	NA	NA	NA
NA	PRNP	NA	NA	NA	NA	NA	NA	NA	NA	NA	NA	NA	NA	NA
NA	PROK2	NA	NA	NA	NA	NA	NA	NA	NA	NA	NA	NA	NA	NA
NA	PROS1	NA	NA	NA	NA	NA	NA	NA	NA	NA	NA	NA	NA	NA
NA	PRPS1	NA	NA	NA	NA	NA	NA	NA	NA	NA	NA	NA	NA	NA
NA	PRR5L	NA	NA	NA	NA	NA	NA	NA	NA	NA	NA	NA	NA	NA
NA	PRRG1	NA	NA	NA	NA	NA	NA	NA	NA	NA	NA	NA	NA	NA
NA	PRSS23	NA	NA	NA	NA	NA	NA	NA	NA	NA	NA	NA	NA	NA
NA	PSAP	NA	NA	NA	NA	NA	NA	NA	NA	NA	NA	NA	NA	NA
NA	PSCA	NA	NA	NA	NA	NA	NA	NA	NA	NA	NA	NA	NA	NA
NA	PSD4	NA	NA	NA	NA	NA	NA	NA	NA	NA	NA	NA	NA	NA
NA	PSG1	NA	NA	NA	NA	NA	NA	NA	NA	NA	NA	NA	NA	NA
NA	PSG11	NA	NA	NA	NA	NA	NA	NA	NA	NA	NA	NA	NA	NA
NA	PSG2	NA	NA	NA	NA	NA	NA	NA	NA	NA	NA	NA	NA	NA
NA	PSG3	NA	NA	NA	NA	NA	NA	NA	NA	NA	NA	NA	NA	NA
NA	PSG9	NA	NA	NA	NA	NA	NA	NA	NA	NA	NA	NA	NA	NA
NA	PSPN	NA	NA	NA	NA	NA	NA	NA	NA	NA	NA	NA	NA	NA
NA	PSTPIP2	NA	NA	NA	NA	NA	NA	NA	NA	NA	NA	NA	NA	NA
NA	PTGFR	NA	NA	NA	NA	NA	NA	NA	NA	NA	NA	NA	NA	NA
NA	PTGFRN	NA	NA	NA	NA	NA	NA	NA	NA	NA	NA	NA	NA	NA
NA	PTGIR	NA	NA	NA	NA	NA	NA	NA	NA	NA	NA	NA	NA	NA
NA	PTGS2	NA	NA	NA	NA	NA	NA	NA	NA	NA	NA	NA	NA	NA
NA	PTHLH	NA	NA	NA	NA	NA	NA	NA	NA	NA	NA	NA	NA	NA
NA	PTP4A1	NA	NA	NA	NA	NA	NA	NA	NA	NA	NA	NA	NA	NA
NA	PTP4A3	NA	NA	NA	NA	NA	NA	NA	NA	NA	NA	NA	NA	NA
NA	PTPN13	NA	NA	NA	NA	NA	NA	NA	NA	NA	NA	NA	NA	NA
NA	PTPRB	NA	NA	NA	NA	NA	NA	NA	NA	NA	NA	NA	NA	NA
NA	PTPRE	NA	NA	NA	NA	NA	NA	NA	NA	NA	NA	NA	NA	NA
NA	PTPRF	NA	NA	NA	NA	NA	NA	NA	NA	NA	NA	NA	NA	NA
NA	PTPRK	NA	NA	NA	NA	NA	NA	NA	NA	NA	NA	NA	NA	NA
NA	PTPRM	NA	NA	NA	NA	NA	NA	NA	NA	NA	NA	NA	NA	NA
NA	PTPRU	NA	NA	NA	NA	NA	NA	NA	NA	NA	NA	NA	NA	NA
NA	PURA	NA	NA	NA	NA	NA	NA	NA	NA	NA	NA	NA	NA	NA
NA	PXDNL	NA	NA	NA	NA	NA	NA	NA	NA	NA	NA	NA	NA	NA
NA	PYGB	NA	NA	NA	NA	NA	NA	NA	NA	NA	NA	NA	NA	NA
NA	PYGL	NA	NA	NA	NA	NA	NA	NA	NA	NA	NA	NA	NA	NA
NA	QPCT	NA	NA	NA	NA	NA	NA	NA	NA	NA	NA	NA	NA	NA
NA	QPCTL	NA	NA	NA	NA	NA	NA	NA	NA	NA	NA	NA	NA	NA
NA	QPRT	NA	NA	NA	NA	NA	NA	NA	NA	NA	NA	NA	NA	NA
NA	RAB11A	NA	NA	NA	NA	NA	NA	NA	NA	NA	NA	NA	NA	NA
NA	RAB11FIP5	NA	NA	NA	NA	NA	NA	NA	NA	NA	NA	NA	NA	NA
NA	RAB26	NA	NA	NA	NA	NA	NA	NA	NA	NA	NA	NA	NA	NA
NA	RAB33B	NA	NA	NA	NA	NA	NA	NA	NA	NA	NA	NA	NA	NA
NA	RAB3A	NA	NA	NA	NA	NA	NA	NA	NA	NA	NA	NA	NA	NA
NA	RAB40B	NA	NA	NA	NA	NA	NA	NA	NA	NA	NA	NA	NA	NA
NA	RAB5A	NA	NA	NA	NA	NA	NA	NA	NA	NA	NA	NA	NA	NA
NA	RAB6B	NA	NA	NA	NA	NA	NA	NA	NA	NA	NA	NA	NA	NA
NA	RABGAP1L	NA	NA	NA	NA	NA	NA	NA	NA	NA	NA	NA	NA	NA
NA	RAI14	NA	NA	NA	NA	NA	NA	NA	NA	NA	NA	NA	NA	NA
NA	RAP1GAP2	NA	NA	NA	NA	NA	NA	NA	NA	NA	NA	NA	NA	NA
NA	RAPGEF2	NA	NA	NA	NA	NA	NA	NA	NA	NA	NA	NA	NA	NA
NA	RAPGEF3	NA	NA	NA	NA	NA	NA	NA	NA	NA	NA	NA	NA	NA
NA	RAPH1	NA	NA	NA	NA	NA	NA	NA	NA	NA	NA	NA	NA	NA
NA	RASA2	NA	NA	NA	NA	NA	NA	NA	NA	NA	NA	NA	NA	NA
NA	RASA4	NA	NA	NA	NA	NA	NA	NA	NA	NA	NA	NA	NA	NA
NA	RASGRP1	NA	NA	NA	NA	NA	NA	NA	NA	NA	NA	NA	NA	NA
NA	RASSF7	NA	NA	NA	NA	NA	NA	NA	NA	NA	NA	NA	NA	NA
NA	RBM24	NA	NA	NA	NA	NA	NA	NA	NA	NA	NA	NA	NA	NA
NA	RBMS1	NA	NA	NA	NA	NA	NA	NA	NA	NA	NA	NA	NA	NA
NA	RBMS2	NA	NA	NA	NA	NA	NA	NA	NA	NA	NA	NA	NA	NA
NA	RBP5	NA	NA	NA	NA	NA	NA	NA	NA	NA	NA	NA	NA	NA
NA	RCAN1	NA	NA	NA	NA	NA	NA	NA	NA	NA	NA	NA	NA	NA
NA	RCOR3	NA	NA	NA	NA	NA	NA	NA	NA	NA	NA	NA	NA	NA
NA	RDH10	NA	NA	NA	NA	NA	NA	NA	NA	NA	NA	NA	NA	NA
NA	RECK	NA	NA	NA	NA	NA	NA	NA	NA	NA	NA	NA	NA	NA
NA	REEP2	NA	NA	NA	NA	NA	NA	NA	NA	NA	NA	NA	NA	NA
NA	REEP3	NA	NA	NA	NA	NA	NA	NA	NA	NA	NA	NA	NA	NA
NA	REEP5	NA	NA	NA	NA	NA	NA	NA	NA	NA	NA	NA	NA	NA
NA	REEP6	NA	NA	NA	NA	NA	NA	NA	NA	NA	NA	NA	NA	NA
NA	REN	NA	NA	NA	NA	NA	NA	NA	NA	NA	NA	NA	NA	NA
NA	RETSAT	NA	NA	NA	NA	NA	NA	NA	NA	NA	NA	NA	NA	NA
NA	RFTN1	NA	NA	NA	NA	NA	NA	NA	NA	NA	NA	NA	NA	NA
NA	RGL3	NA	NA	NA	NA	NA	NA	NA	NA	NA	NA	NA	NA	NA
NA	RGS11	NA	NA	NA	NA	NA	NA	NA	NA	NA	NA	NA	NA	NA
NA	RGS4	NA	NA	NA	NA	NA	NA	NA	NA	NA	NA	NA	NA	NA
NA	RGS5	NA	NA	NA	NA	NA	NA	NA	NA	NA	NA	NA	NA	NA
NA	RGS9	NA	NA	NA	NA	NA	NA	NA	NA	NA	NA	NA	NA	NA
NA	RHBDD2	NA	NA	NA	NA	NA	NA	NA	NA	NA	NA	NA	NA	NA
NA	RHBDF1	NA	NA	NA	NA	NA	NA	NA	NA	NA	NA	NA	NA	NA
NA	RHBDF2	NA	NA	NA	NA	NA	NA	NA	NA	NA	NA	NA	NA	NA
NA	RHBDL2	NA	NA	NA	NA	NA	NA	NA	NA	NA	NA	NA	NA	NA
NA	RHCG	NA	NA	NA	NA	NA	NA	NA	NA	NA	NA	NA	NA	NA
NA	RHD	NA	NA	NA	NA	NA	NA	NA	NA	NA	NA	NA	NA	NA
NA	RHOC	NA	NA	NA	NA	NA	NA	NA	NA	NA	NA	NA	NA	NA
NA	RHOJ	NA	NA	NA	NA	NA	NA	NA	NA	NA	NA	NA	NA	NA
NA	RHOQ	NA	NA	NA	NA	NA	NA	NA	NA	NA	NA	NA	NA	NA
NA	RHOV	NA	NA	NA	NA	NA	NA	NA	NA	NA	NA	NA	NA	NA
NA	RIMS1	NA	NA	NA	NA	NA	NA	NA	NA	NA	NA	NA	NA	NA
NA	RIN2	NA	NA	NA	NA	NA	NA	NA	NA	NA	NA	NA	NA	NA
NA	RIOK3	NA	NA	NA	NA	NA	NA	NA	NA	NA	NA	NA	NA	NA
NA	RIT1	NA	NA	NA	NA	NA	NA	NA	NA	NA	NA	NA	NA	NA
NA	RNASET2	NA	NA	NA	NA	NA	NA	NA	NA	NA	NA	NA	NA	NA
NA	RNF11	NA	NA	NA	NA	NA	NA	NA	NA	NA	NA	NA	NA	NA
NA	RNF13	NA	NA	NA	NA	NA	NA	NA	NA	NA	NA	NA	NA	NA
NA	RNF14	NA	NA	NA	NA	NA	NA	NA	NA	NA	NA	NA	NA	NA
NA	RNF141	NA	NA	NA	NA	NA	NA	NA	NA	NA	NA	NA	NA	NA
NA	RNF144B	NA	NA	NA	NA	NA	NA	NA	NA	NA	NA	NA	NA	NA
NA	RNF150	NA	NA	NA	NA	NA	NA	NA	NA	NA	NA	NA	NA	NA
NA	RNF152	NA	NA	NA	NA	NA	NA	NA	NA	NA	NA	NA	NA	NA
NA	RNF170	NA	NA	NA	NA	NA	NA	NA	NA	NA	NA	NA	NA	NA
NA	RNF181	NA	NA	NA	NA	NA	NA	NA	NA	NA	NA	NA	NA	NA
NA	RNF19A	NA	NA	NA	NA	NA	NA	NA	NA	NA	NA	NA	NA	NA
NA	RNF24	NA	NA	NA	NA	NA	NA	NA	NA	NA	NA	NA	NA	NA
NA	ROGDI	NA	NA	NA	NA	NA	NA	NA	NA	NA	NA	NA	NA	NA
NA	ROMO1	NA	NA	NA	NA	NA	NA	NA	NA	NA	NA	NA	NA	NA
NA	ROR1	NA	NA	NA	NA	NA	NA	NA	NA	NA	NA	NA	NA	NA
NA	RORA	NA	NA	NA	NA	NA	NA	NA	NA	NA	NA	NA	NA	NA
NA	RPL3L	NA	NA	NA	NA	NA	NA	NA	NA	NA	NA	NA	NA	NA
NA	RPRM	NA	NA	NA	NA	NA	NA	NA	NA	NA	NA	NA	NA	NA
NA	RPS27L	NA	NA	NA	NA	NA	NA	NA	NA	NA	NA	NA	NA	NA
NA	RPS6KL1	NA	NA	NA	NA	NA	NA	NA	NA	NA	NA	NA	NA	NA
NA	RRAD	NA	NA	NA	NA	NA	NA	NA	NA	NA	NA	NA	NA	NA
NA	RRAGC	NA	NA	NA	NA	NA	NA	NA	NA	NA	NA	NA	NA	NA
NA	RRAS	NA	NA	NA	NA	NA	NA	NA	NA	NA	NA	NA	NA	NA
NA	RRM2B	NA	NA	NA	NA	NA	NA	NA	NA	NA	NA	NA	NA	NA
NA	RSPH3	NA	NA	NA	NA	NA	NA	NA	NA	NA	NA	NA	NA	NA
NA	RSPO1	NA	NA	NA	NA	NA	NA	NA	NA	NA	NA	NA	NA	NA
NA	RSU1	NA	NA	NA	NA	NA	NA	NA	NA	NA	NA	NA	NA	NA
NA	RTN1	NA	NA	NA	NA	NA	NA	NA	NA	NA	NA	NA	NA	NA
NA	RUNX1	NA	NA	NA	NA	NA	NA	NA	NA	NA	NA	NA	NA	NA
NA	RUSC2	NA	NA	NA	NA	NA	NA	NA	NA	NA	NA	NA	NA	NA
NA	RWDD2A	NA	NA	NA	NA	NA	NA	NA	NA	NA	NA	NA	NA	NA
NA	SAA2	NA	NA	NA	NA	NA	NA	NA	NA	NA	NA	NA	NA	NA
NA	SAMD10	NA	NA	NA	NA	NA	NA	NA	NA	NA	NA	NA	NA	NA
NA	SAMD12	NA	NA	NA	NA	NA	NA	NA	NA	NA	NA	NA	NA	NA
NA	SAMD14	NA	NA	NA	NA	NA	NA	NA	NA	NA	NA	NA	NA	NA
NA	SAMD3	NA	NA	NA	NA	NA	NA	NA	NA	NA	NA	NA	NA	NA
NA	SAMD4A	NA	NA	NA	NA	NA	NA	NA	NA	NA	NA	NA	NA	NA
NA	SAMD9	NA	NA	NA	NA	NA	NA	NA	NA	NA	NA	NA	NA	NA
NA	SAMD9L	NA	NA	NA	NA	NA	NA	NA	NA	NA	NA	NA	NA	NA
NA	SASH1	NA	NA	NA	NA	NA	NA	NA	NA	NA	NA	NA	NA	NA
NA	SAT1	NA	NA	NA	NA	NA	NA	NA	NA	NA	NA	NA	NA	NA
NA	SATB1	NA	NA	NA	NA	NA	NA	NA	NA	NA	NA	NA	NA	NA
NA	SBDS	NA	NA	NA	NA	NA	NA	NA	NA	NA	NA	NA	NA	NA
NA	SCAMP1	NA	NA	NA	NA	NA	NA	NA	NA	NA	NA	NA	NA	NA
NA	SCAMP5	NA	NA	NA	NA	NA	NA	NA	NA	NA	NA	NA	NA	NA
NA	SCD5	NA	NA	NA	NA	NA	NA	NA	NA	NA	NA	NA	NA	NA
NA	SCG2	NA	NA	NA	NA	NA	NA	NA	NA	NA	NA	NA	NA	NA
NA	SCG5	NA	NA	NA	NA	NA	NA	NA	NA	NA	NA	NA	NA	NA
NA	SCGB2A1	NA	NA	NA	NA	NA	NA	NA	NA	NA	NA	NA	NA	NA
NA	SCIN	NA	NA	NA	NA	NA	NA	NA	NA	NA	NA	NA	NA	NA
NA	SCN2A	NA	NA	NA	NA	NA	NA	NA	NA	NA	NA	NA	NA	NA
NA	SCN8A	NA	NA	NA	NA	NA	NA	NA	NA	NA	NA	NA	NA	NA
NA	SCOC	NA	NA	NA	NA	NA	NA	NA	NA	NA	NA	NA	NA	NA
NA	SCUBE3	NA	NA	NA	NA	NA	NA	NA	NA	NA	NA	NA	NA	NA
NA	SDF2	NA	NA	NA	NA	NA	NA	NA	NA	NA	NA	NA	NA	NA
NA	SDF4	NA	NA	NA	NA	NA	NA	NA	NA	NA	NA	NA	NA	NA
NA	SEC14L1	NA	NA	NA	NA	NA	NA	NA	NA	NA	NA	NA	NA	NA
NA	SEC14L2	NA	NA	NA	NA	NA	NA	NA	NA	NA	NA	NA	NA	NA
NA	SEL1L3	NA	NA	NA	NA	NA	NA	NA	NA	NA	NA	NA	NA	NA
NA	SEMA3C	NA	NA	NA	NA	NA	NA	NA	NA	NA	NA	NA	NA	NA
NA	SEMA4F	NA	NA	NA	NA	NA	NA	NA	NA	NA	NA	NA	NA	NA
NA	SEMA5A	NA	NA	NA	NA	NA	NA	NA	NA	NA	NA	NA	NA	NA
NA	SEMA6A	NA	NA	NA	NA	NA	NA	NA	NA	NA	NA	NA	NA	NA
NA	SEMA6D	NA	NA	NA	NA	NA	NA	NA	NA	NA	NA	NA	NA	NA
NA	SERINC1	NA	NA	NA	NA	NA	NA	NA	NA	NA	NA	NA	NA	NA
NA	SERINC2	NA	NA	NA	NA	NA	NA	NA	NA	NA	NA	NA	NA	NA
NA	SERINC3	NA	NA	NA	NA	NA	NA	NA	NA	NA	NA	NA	NA	NA
NA	SERINC5	NA	NA	NA	NA	NA	NA	NA	NA	NA	NA	NA	NA	NA
NA	SERPINA1	NA	NA	NA	NA	NA	NA	NA	NA	NA	NA	NA	NA	NA
NA	SERPINA11	NA	NA	NA	NA	NA	NA	NA	NA	NA	NA	NA	NA	NA
NA	SERPINA3	NA	NA	NA	NA	NA	NA	NA	NA	NA	NA	NA	NA	NA
NA	SERPINA9	NA	NA	NA	NA	NA	NA	NA	NA	NA	NA	NA	NA	NA
NA	SERPINB7	NA	NA	NA	NA	NA	NA	NA	NA	NA	NA	NA	NA	NA
NA	SERPINB8	NA	NA	NA	NA	NA	NA	NA	NA	NA	NA	NA	NA	NA
NA	SERPINE1	NA	NA	NA	NA	NA	NA	NA	NA	NA	NA	NA	NA	NA
NA	SERPINE2	NA	NA	NA	NA	NA	NA	NA	NA	NA	NA	NA	NA	NA
NA	SERPINI1	NA	NA	NA	NA	NA	NA	NA	NA	NA	NA	NA	NA	NA
NA	SERTAD4	NA	NA	NA	NA	NA	NA	NA	NA	NA	NA	NA	NA	NA
NA	SESN1	NA	NA	NA	NA	NA	NA	NA	NA	NA	NA	NA	NA	NA
NA	SETD7	NA	NA	NA	NA	NA	NA	NA	NA	NA	NA	NA	NA	NA
NA	SEZ6L2	NA	NA	NA	NA	NA	NA	NA	NA	NA	NA	NA	NA	NA
NA	SFRP1	NA	NA	NA	NA	NA	NA	NA	NA	NA	NA	NA	NA	NA
NA	SFXN3	NA	NA	NA	NA	NA	NA	NA	NA	NA	NA	NA	NA	NA
NA	SGCB	NA	NA	NA	NA	NA	NA	NA	NA	NA	NA	NA	NA	NA
NA	SGIP1	NA	NA	NA	NA	NA	NA	NA	NA	NA	NA	NA	NA	NA
NA	SGK1	NA	NA	NA	NA	NA	NA	NA	NA	NA	NA	NA	NA	NA
NA	SGMS2	NA	NA	NA	NA	NA	NA	NA	NA	NA	NA	NA	NA	NA
NA	SGPP1	NA	NA	NA	NA	NA	NA	NA	NA	NA	NA	NA	NA	NA
NA	SGSH	NA	NA	NA	NA	NA	NA	NA	NA	NA	NA	NA	NA	NA
NA	SGTB	NA	NA	NA	NA	NA	NA	NA	NA	NA	NA	NA	NA	NA
NA	SH2D3A	NA	NA	NA	NA	NA	NA	NA	NA	NA	NA	NA	NA	NA
NA	SH3BGRL	NA	NA	NA	NA	NA	NA	NA	NA	NA	NA	NA	NA	NA
NA	SH3BGRL2	NA	NA	NA	NA	NA	NA	NA	NA	NA	NA	NA	NA	NA
NA	SH3BP5L	NA	NA	NA	NA	NA	NA	NA	NA	NA	NA	NA	NA	NA
NA	SH3GLB1	NA	NA	NA	NA	NA	NA	NA	NA	NA	NA	NA	NA	NA
NA	SH3PXD2A	NA	NA	NA	NA	NA	NA	NA	NA	NA	NA	NA	NA	NA
NA	SH3RF1	NA	NA	NA	NA	NA	NA	NA	NA	NA	NA	NA	NA	NA
NA	SH3RF2	NA	NA	NA	NA	NA	NA	NA	NA	NA	NA	NA	NA	NA
NA	SH3TC2	NA	NA	NA	NA	NA	NA	NA	NA	NA	NA	NA	NA	NA
NA	SHANK1	NA	NA	NA	NA	NA	NA	NA	NA	NA	NA	NA	NA	NA
NA	SHB	NA	NA	NA	NA	NA	NA	NA	NA	NA	NA	NA	NA	NA
NA	SHBG	NA	NA	NA	NA	NA	NA	NA	NA	NA	NA	NA	NA	NA
NA	SHC3	NA	NA	NA	NA	NA	NA	NA	NA	NA	NA	NA	NA	NA
NA	SHC4	NA	NA	NA	NA	NA	NA	NA	NA	NA	NA	NA	NA	NA
NA	SHOX2	NA	NA	NA	NA	NA	NA	NA	NA	NA	NA	NA	NA	NA
NA	SHROOM3	NA	NA	NA	NA	NA	NA	NA	NA	NA	NA	NA	NA	NA
NA	SHROOM4	NA	NA	NA	NA	NA	NA	NA	NA	NA	NA	NA	NA	NA
NA	SIL1	NA	NA	NA	NA	NA	NA	NA	NA	NA	NA	NA	NA	NA
NA	SIPA1L1	NA	NA	NA	NA	NA	NA	NA	NA	NA	NA	NA	NA	NA
NA	SLA	NA	NA	NA	NA	NA	NA	NA	NA	NA	NA	NA	NA	NA
NA	SLAMF8	NA	NA	NA	NA	NA	NA	NA	NA	NA	NA	NA	NA	NA
NA	SLC10A3	NA	NA	NA	NA	NA	NA	NA	NA	NA	NA	NA	NA	NA
NA	SLC10A6	NA	NA	NA	NA	NA	NA	NA	NA	NA	NA	NA	NA	NA
NA	SLC12A4	NA	NA	NA	NA	NA	NA	NA	NA	NA	NA	NA	NA	NA
NA	SLC15A4	NA	NA	NA	NA	NA	NA	NA	NA	NA	NA	NA	NA	NA
NA	SLC16A2	NA	NA	NA	NA	NA	NA	NA	NA	NA	NA	NA	NA	NA
NA	SLC16A3	NA	NA	NA	NA	NA	NA	NA	NA	NA	NA	NA	NA	NA
NA	SLC17A5	NA	NA	NA	NA	NA	NA	NA	NA	NA	NA	NA	NA	NA
NA	SLC19A2	NA	NA	NA	NA	NA	NA	NA	NA	NA	NA	NA	NA	NA
NA	SLC1A1	NA	NA	NA	NA	NA	NA	NA	NA	NA	NA	NA	NA	NA
NA	SLC1A7	NA	NA	NA	NA	NA	NA	NA	NA	NA	NA	NA	NA	NA
NA	SLC20A1	NA	NA	NA	NA	NA	NA	NA	NA	NA	NA	NA	NA	NA
NA	SLC20A2	NA	NA	NA	NA	NA	NA	NA	NA	NA	NA	NA	NA	NA
NA	SLC22A13	NA	NA	NA	NA	NA	NA	NA	NA	NA	NA	NA	NA	NA
NA	SLC22A15	NA	NA	NA	NA	NA	NA	NA	NA	NA	NA	NA	NA	NA
NA	SLC22A18	NA	NA	NA	NA	NA	NA	NA	NA	NA	NA	NA	NA	NA
NA	SLC22A23	NA	NA	NA	NA	NA	NA	NA	NA	NA	NA	NA	NA	NA
NA	SLC22A4	NA	NA	NA	NA	NA	NA	NA	NA	NA	NA	NA	NA	NA
NA	SLC22A5	NA	NA	NA	NA	NA	NA	NA	NA	NA	NA	NA	NA	NA
NA	SLC24A4	NA	NA	NA	NA	NA	NA	NA	NA	NA	NA	NA	NA	NA
NA	SLC25A20	NA	NA	NA	NA	NA	NA	NA	NA	NA	NA	NA	NA	NA
NA	SLC25A23	NA	NA	NA	NA	NA	NA	NA	NA	NA	NA	NA	NA	NA
NA	SLC25A4	NA	NA	NA	NA	NA	NA	NA	NA	NA	NA	NA	NA	NA
NA	SLC25A45	NA	NA	NA	NA	NA	NA	NA	NA	NA	NA	NA	NA	NA
NA	SLC26A1	NA	NA	NA	NA	NA	NA	NA	NA	NA	NA	NA	NA	NA
NA	SLC26A2	NA	NA	NA	NA	NA	NA	NA	NA	NA	NA	NA	NA	NA
NA	SLC27A4	NA	NA	NA	NA	NA	NA	NA	NA	NA	NA	NA	NA	NA
NA	SLC2A1	NA	NA	NA	NA	NA	NA	NA	NA	NA	NA	NA	NA	NA
NA	SLC2A10	NA	NA	NA	NA	NA	NA	NA	NA	NA	NA	NA	NA	NA
NA	SLC2A11	NA	NA	NA	NA	NA	NA	NA	NA	NA	NA	NA	NA	NA
NA	SLC2A13	NA	NA	NA	NA	NA	NA	NA	NA	NA	NA	NA	NA	NA
NA	SLC2A14	NA	NA	NA	NA	NA	NA	NA	NA	NA	NA	NA	NA	NA
NA	SLC2A6	NA	NA	NA	NA	NA	NA	NA	NA	NA	NA	NA	NA	NA
NA	SLC2A9	NA	NA	NA	NA	NA	NA	NA	NA	NA	NA	NA	NA	NA
NA	SLC30A4	NA	NA	NA	NA	NA	NA	NA	NA	NA	NA	NA	NA	NA
NA	SLC31A2	NA	NA	NA	NA	NA	NA	NA	NA	NA	NA	NA	NA	NA
NA	SLC33A1	NA	NA	NA	NA	NA	NA	NA	NA	NA	NA	NA	NA	NA
NA	SLC35A1	NA	NA	NA	NA	NA	NA	NA	NA	NA	NA	NA	NA	NA
NA	SLC35A3	NA	NA	NA	NA	NA	NA	NA	NA	NA	NA	NA	NA	NA
NA	SLC35B3	NA	NA	NA	NA	NA	NA	NA	NA	NA	NA	NA	NA	NA
NA	SLC35E1	NA	NA	NA	NA	NA	NA	NA	NA	NA	NA	NA	NA	NA
NA	SLC35E3	NA	NA	NA	NA	NA	NA	NA	NA	NA	NA	NA	NA	NA
NA	SLC35F3	NA	NA	NA	NA	NA	NA	NA	NA	NA	NA	NA	NA	NA
NA	SLC35F5	NA	NA	NA	NA	NA	NA	NA	NA	NA	NA	NA	NA	NA
NA	SLC36A1	NA	NA	NA	NA	NA	NA	NA	NA	NA	NA	NA	NA	NA
NA	SLC38A11	NA	NA	NA	NA	NA	NA	NA	NA	NA	NA	NA	NA	NA
NA	SLC38A7	NA	NA	NA	NA	NA	NA	NA	NA	NA	NA	NA	NA	NA
NA	SLC38A9	NA	NA	NA	NA	NA	NA	NA	NA	NA	NA	NA	NA	NA
NA	SLC39A10	NA	NA	NA	NA	NA	NA	NA	NA	NA	NA	NA	NA	NA
NA	SLC39A13	NA	NA	NA	NA	NA	NA	NA	NA	NA	NA	NA	NA	NA
NA	SLC39A6	NA	NA	NA	NA	NA	NA	NA	NA	NA	NA	NA	NA	NA
NA	SLC39A8	NA	NA	NA	NA	NA	NA	NA	NA	NA	NA	NA	NA	NA
NA	SLC41A2	NA	NA	NA	NA	NA	NA	NA	NA	NA	NA	NA	NA	NA
NA	SLC43A2	NA	NA	NA	NA	NA	NA	NA	NA	NA	NA	NA	NA	NA
NA	SLC44A3	NA	NA	NA	NA	NA	NA	NA	NA	NA	NA	NA	NA	NA
NA	SLC45A4	NA	NA	NA	NA	NA	NA	NA	NA	NA	NA	NA	NA	NA
NA	SLC46A3	NA	NA	NA	NA	NA	NA	NA	NA	NA	NA	NA	NA	NA
NA	SLC47A1	NA	NA	NA	NA	NA	NA	NA	NA	NA	NA	NA	NA	NA
NA	SLC4A11	NA	NA	NA	NA	NA	NA	NA	NA	NA	NA	NA	NA	NA
NA	SLC4A3	NA	NA	NA	NA	NA	NA	NA	NA	NA	NA	NA	NA	NA
NA	SLC4A5	NA	NA	NA	NA	NA	NA	NA	NA	NA	NA	NA	NA	NA
NA	SLC4A9	NA	NA	NA	NA	NA	NA	NA	NA	NA	NA	NA	NA	NA
NA	SLC5A3	NA	NA	NA	NA	NA	NA	NA	NA	NA	NA	NA	NA	NA
NA	SLC6A18	NA	NA	NA	NA	NA	NA	NA	NA	NA	NA	NA	NA	NA
NA	SLC6A4	NA	NA	NA	NA	NA	NA	NA	NA	NA	NA	NA	NA	NA
NA	SLC6A6	NA	NA	NA	NA	NA	NA	NA	NA	NA	NA	NA	NA	NA
NA	SLC7A5	NA	NA	NA	NA	NA	NA	NA	NA	NA	NA	NA	NA	NA
NA	SLC9A3R2	NA	NA	NA	NA	NA	NA	NA	NA	NA	NA	NA	NA	NA
NA	SLC9A7	NA	NA	NA	NA	NA	NA	NA	NA	NA	NA	NA	NA	NA
NA	SLCO2A1	NA	NA	NA	NA	NA	NA	NA	NA	NA	NA	NA	NA	NA
NA	SLFN5	NA	NA	NA	NA	NA	NA	NA	NA	NA	NA	NA	NA	NA
NA	SLURP1	NA	NA	NA	NA	NA	NA	NA	NA	NA	NA	NA	NA	NA
NA	SMOC1	NA	NA	NA	NA	NA	NA	NA	NA	NA	NA	NA	NA	NA
NA	SMPD1	NA	NA	NA	NA	NA	NA	NA	NA	NA	NA	NA	NA	NA
NA	SMURF2	NA	NA	NA	NA	NA	NA	NA	NA	NA	NA	NA	NA	NA
NA	SNAPC3	NA	NA	NA	NA	NA	NA	NA	NA	NA	NA	NA	NA	NA
NA	SNORA37	NA	NA	NA	NA	NA	NA	NA	NA	NA	NA	NA	NA	NA
NA	SNORA60	NA	NA	NA	NA	NA	NA	NA	NA	NA	NA	NA	NA	NA
NA	SNTA1	NA	NA	NA	NA	NA	NA	NA	NA	NA	NA	NA	NA	NA
NA	SNX24	NA	NA	NA	NA	NA	NA	NA	NA	NA	NA	NA	NA	NA
NA	SNX25	NA	NA	NA	NA	NA	NA	NA	NA	NA	NA	NA	NA	NA
NA	SOHLH1	NA	NA	NA	NA	NA	NA	NA	NA	NA	NA	NA	NA	NA
NA	SORBS1	NA	NA	NA	NA	NA	NA	NA	NA	NA	NA	NA	NA	NA
NA	SORCS2	NA	NA	NA	NA	NA	NA	NA	NA	NA	NA	NA	NA	NA
NA	SORT1	NA	NA	NA	NA	NA	NA	NA	NA	NA	NA	NA	NA	NA
[truncated: 303 more rows]

## Sheet: GSE59861_24h_GSE55118
X1_sets_GSE55118_middle_vs_young	X1_sets_GSE55118_old_vs_young	X1_sets_GSE59861_24h_2Gy	X1_sets_GSE59861_24h_5cGy	X2_sets_GSE55118_middle_vs_young_GSE55118_old_vs_young	X2_sets_GSE55118_middle_vs_young_GSE59861_24h_2Gy	X2_sets_GSE55118_middle_vs_young_GSE59861_24h_5cGy	X2_sets_GSE55118_old_vs_young_GSE59861_24h_2Gy	X2_sets_GSE55118_old_vs_young_GSE59861_24h_5cGy	X2_sets_GSE59861_24h_2Gy_GSE59861_24h_5cGy	X3_sets_GSE55118_middle_vs_young_GSE55118_old_vs_young_GSE59861_24h_2Gy	X3_sets_GSE55118_middle_vs_young_GSE55118_old_vs_young_GSE59861_24h_5cGy	X3_sets_GSE55118_middle_vs_young_GSE59861_24h_2Gy_GSE59861_24h_5cGy	X3_sets_GSE55118_old_vs_young_GSE59861_24h_2Gy_GSE59861_24h_5cGy	X4_sets_GSE55118_middle_vs_young_GSE55118_old_vs_young_GSE59861_24h_2Gy_GSE59861_24h_5cGy
[truncated: 585 more rows]
